# Supplementary material
Source: Research Square preprint supplement (doi:10.21203/rs.3.rs-5333191/v1)
Supplement: Supplementary file 1 [file 1a02cfd1e3052f86232bc8e5.xlsx]

## Sheet: DEG_48hpf_prolLEC
48 hpf prol LEC	p_val	avg_log2FC	pct.1	pct.2	p_val_adj	cluster	gene
prc1a.2	1.339e-30	3.43179	0.674	0.433	3.38351e-26	48h-prol-LEC	prc1a
si:ch211-69g19.2.2	2.34632e-34	3.4083	0.831	0.633	5.92891e-30	48h-prol-LEC	si:ch211-69g19.2
ccnb1.2	1.67447e-34	3.39937	0.783	0.578	4.23121e-30	48h-prol-LEC	ccnb1
tacc3.2	4.26035e-30	3.21585	0.674	0.433	1.07655e-25	48h-prol-LEC	tacc3
kpna2.2	3.46811e-56	3.17528	0.97	0.916	8.76357e-52	48h-prol-LEC	kpna2
ccnb3.2	3.66469e-25	3.16362	0.509	0.251	9.26029e-21	48h-prol-LEC	ccnb3
depdc1a.2	7.60259e-23	3.09905	0.565	0.331	1.9211e-18	48h-prol-LEC	depdc1a
ndc80.2	3.49688e-36	3.05454	0.657	0.377	8.83626e-32	48h-prol-LEC	ndc80
kif2c.2	5.62071e-29	3.04218	0.651	0.409	1.4203e-24	48h-prol-LEC	kif2c
kif11.2	2.95978e-40	2.97291	0.876	0.705	7.47908e-36	48h-prol-LEC	kif11
prc1b.2	4.50369e-32	2.86918	0.644	0.368	1.13804e-27	48h-prol-LEC	prc1b
nusap1.2	1.49451e-49	2.83041	0.834	0.564	3.77648e-45	48h-prol-LEC	nusap1
racgap1.2	6.50606e-24	2.80539	0.696	0.494	1.64402e-19	48h-prol-LEC	racgap1
kif20bb.2	4.50055e-23	2.75465	0.522	0.283	1.13724e-18	48h-prol-LEC	kif20bb
si:dkey-225f5.4.2	5.15334e-25	2.73493	0.53	0.28	1.3022e-20	48h-prol-LEC	si:dkey-225f5.4
cdk1.2	2.57337e-59	2.70148	0.916	0.738	6.50266e-55	48h-prol-LEC	cdk1
hmmr.2	2.72691e-20	2.67063	0.505	0.283	6.89064e-16	48h-prol-LEC	hmmr
kif20a.2	2.14831e-25	2.66967	0.686	0.467	5.42857e-21	48h-prol-LEC	kif20a
kifc1.2	6.74093e-32	2.64276	0.818	0.647	1.70337e-27	48h-prol-LEC	kifc1
arhgef39.2	1.55715e-18	2.61443	0.533	0.333	3.93476e-14	48h-prol-LEC	arhgef39
top2a.2	3.46633e-35	2.61081	0.907	0.788	8.75907e-31	48h-prol-LEC	top2a
tpx2.2	2.77081e-44	2.60174	0.898	0.748	7.00155e-40	48h-prol-LEC	tpx2
aurka.2	8.08185e-31	2.59816	0.683	0.414	2.0422e-26	48h-prol-LEC	aurka
fbxo5.2	4.54796e-15	2.598	0.582	0.405	1.14922e-10	48h-prol-LEC	fbxo5
cdc20.2	4.58341e-38	2.59045	0.75	0.499	1.15818e-33	48h-prol-LEC	cdc20
cdc45.2	3.57201e-24	2.57076	0.551	0.317	9.02611e-20	48h-prol-LEC	cdc45
si:ch211-156j22.4.2	1.14131e-20	2.56245	0.587	0.382	2.88398e-16	48h-prol-LEC	si:ch211-156j22.4
mad2l1.2	1.46849e-47	2.54952	0.716	0.405	3.71072e-43	48h-prol-LEC	mad2l1
cenpe.2	8.2728e-19	2.54455	0.63	0.443	2.09045e-14	48h-prol-LEC	cenpe
ncapg.2	1.20475e-29	2.54193	0.753	0.569	3.04429e-25	48h-prol-LEC	ncapg
dlgap5.2	2.36783e-40	2.53826	0.825	0.582	5.98327e-36	48h-prol-LEC	dlgap5
sgo1.2	6.96529e-34	2.53401	0.661	0.39	1.76006e-29	48h-prol-LEC	sgo1
cdca8.2	8.12201e-34	2.53154	0.602	0.322	2.05235e-29	48h-prol-LEC	cdca8
cenpf.2	3.67732e-32	2.52343	0.744	0.53	9.29223e-28	48h-prol-LEC	cenpf
ttk.2	7.89668e-26	2.49657	0.742	0.54	1.99541e-21	48h-prol-LEC	ttk
esco2.2	1.01819e-24	2.49547	0.755	0.588	2.57287e-20	48h-prol-LEC	esco2
ncaph.2	5.40767e-42	2.47841	0.758	0.499	1.36646e-37	48h-prol-LEC	ncaph
zgc:110540.2	3.1421e-23	2.46121	0.593	0.356	7.93977e-19	48h-prol-LEC	zgc:110540
armc1l.2	1.93658e-34	2.45445	0.581	0.29	4.89356e-30	48h-prol-LEC	armc1l
aspm.2	1.90971e-34	2.43597	0.755	0.501	4.82566e-30	48h-prol-LEC	aspm
bub1.2	2.12421e-22	2.39054	0.643	0.421	5.36766e-18	48h-prol-LEC	bub1
spdl1.2	6.20765e-27	2.38337	0.616	0.36	1.56861e-22	48h-prol-LEC	spdl1
haus4.2	3.63839e-21	2.3814	0.505	0.28	9.19384e-17	48h-prol-LEC	haus4
ube2c:1.2	2.05032e-35	2.37312	0.711	0.465	5.18097e-31	48h-prol-LEC	ube2c:1
anln.2	1.50507e-18	2.32988	0.643	0.47	3.80316e-14	48h-prol-LEC	anln
aurkb.2	4.22308e-54	2.32146	0.888	0.678	1.06713e-49	48h-prol-LEC	aurkb
cks1b.2	1.87826e-34	2.29875	0.609	0.344	4.74617e-30	48h-prol-LEC	cks1b
plk1.2	1.23995e-41	2.27551	0.974	0.882	3.13322e-37	48h-prol-LEC	plk1
prr11.2	1.14795e-18	2.25334	0.526	0.319	2.90076e-14	48h-prol-LEC	prr11
e2f8.2	4.47117e-22	2.24612	0.689	0.48	1.12982e-17	48h-prol-LEC	e2f8
tk1.2	5.9837e-22	2.23961	0.59	0.378	1.51202e-17	48h-prol-LEC	tk1
hist1h4l:21.2	3.45056e-31	2.22796	0.553	0.273	8.71923e-27	48h-prol-LEC	hist1h4l:21
krcp.2	4.71672e-15	2.22269	0.543	0.364	1.19187e-10	48h-prol-LEC	krcp
rrm2.2	1.60463e-29	2.209	0.688	0.445	4.05474e-25	48h-prol-LEC	rrm2
ska3.2	7.15874e-18	2.19469	0.606	0.412	1.80894e-13	48h-prol-LEC	ska3
ccnf.2	8.11897e-19	2.19365	0.599	0.397	2.05158e-14	48h-prol-LEC	ccnf
mki67.2	4.70875e-53	2.18593	0.933	0.793	1.18985e-48	48h-prol-LEC	mki67
mibp.2	2.39304e-40	2.15387	0.859	0.664	6.04697e-36	48h-prol-LEC	mibp
slc29a2.2	7.02e-15	2.13138	0.59	0.419	1.77388e-10	48h-prol-LEC	slc29a2
asf1ba.2	1.23744e-33	2.12278	0.71	0.459	3.1269e-29	48h-prol-LEC	asf1ba
bub1ba.2	3.5747e-24	2.11839	0.553	0.307	9.03292e-20	48h-prol-LEC	bub1ba
si:ch211-244o22.2.2	1.10016e-28	2.11734	0.576	0.336	2.78001e-24	48h-prol-LEC	si:ch211-244o22.2
kif15.2	1.88334e-14	2.11215	0.679	0.51	4.75901e-10	48h-prol-LEC	kif15
ect2.2	8.40885e-18	2.10765	0.53	0.336	2.12483e-13	48h-prol-LEC	ect2
haus6.2	1.41144e-19	2.10067	0.623	0.405	3.56657e-15	48h-prol-LEC	haus6
kif22.2	2.19948e-39	2.08538	0.898	0.721	5.55785e-35	48h-prol-LEC	kif22
spc24.2	6.08979e-25	2.08187	0.559	0.313	1.53883e-20	48h-prol-LEC	spc24
ccna2.2	7.09591e-57	2.04211	0.939	0.786	1.79307e-52	48h-prol-LEC	ccna2
pole2.2	9.85666e-21	2.03798	0.543	0.319	2.49068e-16	48h-prol-LEC	pole2
ncaph2.2	2.67314e-18	2.02428	0.559	0.364	6.75475e-14	48h-prol-LEC	ncaph2
smc2.2	8.05442e-32	2.0153	0.851	0.666	2.03527e-27	48h-prol-LEC	smc2
si:dkey-30c15.10.2	2.65137e-37	2.00381	0.877	0.676	6.69975e-33	48h-prol-LEC	si:dkey-30c15.10
si:ch211-266i6.3.2	1.81961e-22	1.99588	0.539	0.295	4.59797e-18	48h-prol-LEC	si:ch211-266i6.3
zgc:86764.2	3.08974e-31	1.97835	0.674	0.405	7.80745e-27	48h-prol-LEC	zgc:86764
ncapg2.2	1.49674e-18	1.942	0.601	0.398	3.78212e-14	48h-prol-LEC	ncapg2
cahz.1	1.13863e-17	1.93934	0.654	0.516	2.87721e-13	48h-prol-LEC	cahz
cdca5.2	1.88723e-23	1.90168	0.613	0.391	4.76883e-19	48h-prol-LEC	cdca5
suv39h1b.2	3.64289e-14	1.88659	0.59	0.404	9.20522e-10	48h-prol-LEC	suv39h1b
tmeff2a.1	1.14908e-14	1.85116	0.509	0.316	2.90361e-10	48h-prol-LEC	tmeff2a
and1.1	1.31193e-13	1.8503	0.554	0.398	3.3151e-09	48h-prol-LEC	and1
ccne2.2	1.89268e-12	1.82825	0.568	0.416	4.78262e-08	48h-prol-LEC	ccne2
pbk.2	1.68976e-24	1.82596	0.616	0.365	4.26986e-20	48h-prol-LEC	pbk
pclaf.2	4.70519e-28	1.82225	0.542	0.269	1.18895e-23	48h-prol-LEC	pclaf
kif23.2	2.60055e-23	1.81272	0.831	0.629	6.57132e-19	48h-prol-LEC	kif23
znfl2a.1	1.78603e-17	1.81009	0.584	0.402	4.51313e-13	48h-prol-LEC	znfl2a
arhgap11a.2	3.21806e-17	1.79293	0.537	0.333	8.13171e-13	48h-prol-LEC	arhgap11a
ncapd2.2	3.68315e-31	1.77758	0.842	0.657	9.30696e-27	48h-prol-LEC	ncapd2
mybl2b.2	7.36808e-11	1.77069	0.52	0.37	1.86184e-06	48h-prol-LEC	mybl2b
aqp3a.1	9.50449e-11	1.76805	0.503	0.381	2.40169e-06	48h-prol-LEC	aqp3a
tmem59l.1	1.86962e-11	1.74733	0.626	0.475	4.72435e-07	48h-prol-LEC	tmem59l
hbbe2.1	1.7376e-14	1.74611	0.584	0.439	4.39074e-10	48h-prol-LEC	hbbe2
cdc25b.2	9.08999e-33	1.73107	0.801	0.593	2.29695e-28	48h-prol-LEC	cdc25b
raver1.2	1.78078e-15	1.71672	0.537	0.344	4.49985e-11	48h-prol-LEC	raver1
rrm1.2	4.27408e-60	1.70996	0.997	0.984	1.08002e-55	48h-prol-LEC	rrm1
TUBB4B.2	5.16981e-21	1.70987	0.582	0.367	1.30636e-16	48h-prol-LEC	TUBB4B
tspan36.1	1.78668e-23	1.70842	0.655	0.438	4.51477e-19	48h-prol-LEC	tspan36
CABZ01058261.1.2	6.19134e-39	1.69707	0.902	0.744	1.56449e-34	48h-prol-LEC	CABZ01058261.1
and2.1	2.48654e-13	1.69372	0.593	0.439	6.28325e-09	48h-prol-LEC	and2
tyms.2	3.28635e-23	1.69141	0.606	0.385	8.30427e-19	48h-prol-LEC	tyms
CABZ01074130.1.1	1.3697e-13	1.68889	0.584	0.426	3.4611e-09	48h-prol-LEC	CABZ01074130.1
pola2.2	1.33827e-19	1.68796	0.661	0.459	3.38167e-15	48h-prol-LEC	pola2
hbbe3.1	4.04746e-11	1.68734	0.672	0.592	1.02275e-06	48h-prol-LEC	hbbe3
lrrc17.1	3.6667e-13	1.6827	0.509	0.353	9.26537e-09	48h-prol-LEC	lrrc17
rad51.2	2.34189e-19	1.67644	0.651	0.443	5.91772e-15	48h-prol-LEC	rad51
hbae3.1	1.90823e-12	1.64283	0.761	0.68	4.82191e-08	48h-prol-LEC	hbae3
shmt1.2	1.6882e-33	1.63665	0.793	0.591	4.2659e-29	48h-prol-LEC	shmt1
pold1.2	9.81514e-23	1.62742	0.812	0.686	2.48019e-18	48h-prol-LEC	pold1
dclre1b.2	3.21999e-16	1.61991	0.536	0.33	8.1366e-12	48h-prol-LEC	dclre1b
slbp.2	1.07141e-27	1.6195	0.839	0.697	2.70735e-23	48h-prol-LEC	slbp
pah.1	3.58332e-13	1.61697	0.533	0.38	9.05468e-09	48h-prol-LEC	pah
pcna.2	3.66534e-61	1.61493	1	0.996	9.26195e-57	48h-prol-LEC	pcna
ctsh.1	7.14762e-20	1.60888	0.649	0.446	1.80613e-15	48h-prol-LEC	ctsh
fen1.2	1.28401e-41	1.60615	0.882	0.69	3.24458e-37	48h-prol-LEC	fen1
lbr.2	2.21725e-48	1.60541	0.98	0.943	5.60277e-44	48h-prol-LEC	lbr
smc4.2	1.63446e-39	1.60244	0.901	0.744	4.13012e-35	48h-prol-LEC	smc4
tent5ab.1	3.33821e-16	1.60049	0.657	0.497	8.43532e-12	48h-prol-LEC	tent5ab
slc4a1a.1	4.9003e-16	1.59887	0.665	0.533	1.23826e-11	48h-prol-LEC	slc4a1a
chaf1a.2	1.28491e-33	1.59039	0.899	0.759	3.24683e-29	48h-prol-LEC	chaf1a
alas2.1	4.91999e-18	1.58629	0.661	0.517	1.24323e-13	48h-prol-LEC	alas2
hbae1.3.1	4.88163e-12	1.58577	0.651	0.541	1.23354e-07	48h-prol-LEC	hbae1.3
rfc1.2	2.99746e-10	1.58557	0.528	0.371	7.57428e-06	48h-prol-LEC	rfc1
wnt11.1	7.68753e-17	1.58258	0.606	0.422	1.94256e-12	48h-prol-LEC	wnt11
mafa.1	5.08528e-17	1.578	0.612	0.436	1.285e-12	48h-prol-LEC	mafa
stmn1a.2	2.40607e-44	1.57078	0.846	0.592	6.07989e-40	48h-prol-LEC	stmn1a
aaas.2	1.57092e-22	1.56763	0.691	0.477	3.96955e-18	48h-prol-LEC	aaas
ivns1abpb.2	4.10494e-19	1.55089	0.79	0.633	1.03728e-14	48h-prol-LEC	ivns1abpb
fn1a.1	1.54335e-08	1.53907	0.592	0.438	0.00038999	48h-prol-LEC	fn1a
pom121.2	9.82898e-32	1.53547	0.854	0.68	2.48369e-27	48h-prol-LEC	pom121
hbae1.3:1.1	5.23874e-13	1.52733	0.63	0.508	1.32378e-08	48h-prol-LEC	hbae1.3:1
dsn1.2	2.20061e-18	1.52618	0.526	0.307	5.56073e-14	48h-prol-LEC	dsn1
dhfr.2	1.75983e-20	1.50314	0.54	0.309	4.44691e-16	48h-prol-LEC	dhfr
vcanb.1	1.04492e-12	1.49018	0.561	0.405	2.6404e-08	48h-prol-LEC	vcanb
zgc:110425.2	5.27022e-15	1.45562	0.57	0.394	1.33173e-10	48h-prol-LEC	zgc:110425
nt5c2l1.1	1.77012e-15	1.45109	0.551	0.384	4.47293e-11	48h-prol-LEC	nt5c2l1
rrm2:1.2	1.35597e-20	1.44324	0.526	0.282	3.4264e-16	48h-prol-LEC	rrm2:1
hbae1.1.1	2.46301e-13	1.44293	0.663	0.542	6.22377e-09	48h-prol-LEC	hbae1.1
myca.2	5.81237e-23	1.4421	0.713	0.499	1.46873e-18	48h-prol-LEC	myca
cyp1c1.1	1.14444e-14	1.44173	0.922	0.907	2.89189e-10	48h-prol-LEC	cyp1c1
nasp.2	9.62488e-31	1.41766	0.974	0.912	2.43211e-26	48h-prol-LEC	nasp
prim1.2	2.01684e-13	1.41663	0.584	0.415	5.09636e-09	48h-prol-LEC	prim1
hbbe1.2.1	7.05127e-12	1.41352	0.699	0.591	1.78179e-07	48h-prol-LEC	hbbe1.2
hbbe1.3.1	2.01631e-11	1.40482	0.727	0.65	5.095e-07	48h-prol-LEC	hbbe1.3
prim2.2	1.01399e-24	1.3957	0.741	0.506	2.56224e-20	48h-prol-LEC	prim2
chaf1b.2	2.26221e-17	1.39208	0.688	0.5	5.71637e-13	48h-prol-LEC	chaf1b
cdc6.2	3.11018e-21	1.39174	0.78	0.599	7.85912e-17	48h-prol-LEC	cdc6
dek.2	5.4699e-19	1.39035	0.658	0.469	1.38219e-14	48h-prol-LEC	dek
cxcl12a.2	2.30331e-31	1.37139	0.898	0.721	5.82024e-27	48h-prol-LEC	cxcl12a
hgd.1	2.40633e-14	1.36305	0.592	0.419	6.08055e-10	48h-prol-LEC	hgd
col18a1a.1	4.60148e-17	1.35162	0.741	0.586	1.16275e-12	48h-prol-LEC	col18a1a
fbln1.1	8.22272e-13	1.35059	0.561	0.395	2.0778e-08	48h-prol-LEC	fbln1
dnmt1.2	6.37503e-21	1.34266	0.828	0.667	1.61091e-16	48h-prol-LEC	dnmt1
tuba1b.2	9.25144e-22	1.34257	0.915	0.778	2.33775e-17	48h-prol-LEC	tuba1b
stab2.2	3.45992e-30	1.34028	0.997	0.969	8.74288e-26	48h-prol-LEC	stab2
npl.1	7.34841e-08	1.33703	0.672	0.601	0.00185687	48h-prol-LEC	npl
si:ch211-161h7.4.2	3.64577e-17	1.32942	0.609	0.414	9.2125e-13	48h-prol-LEC	si:ch211-161h7.4
atad5a.2	3.89993e-13	1.32605	0.557	0.402	9.85474e-09	48h-prol-LEC	atad5a
nucks1b.2	4.17591e-24	1.31278	0.828	0.63	1.05521e-19	48h-prol-LEC	nucks1b
plk4.2	2.42286e-11	1.30723	0.553	0.391	6.12233e-07	48h-prol-LEC	plk4
hat1.2	2.7233e-27	1.3001	0.817	0.593	6.88151e-23	48h-prol-LEC	hat1
pold2.2	3.70957e-08	1.29846	0.523	0.38	0.000937372	48h-prol-LEC	pold2
napsa.1	1.93485e-18	1.29729	0.688	0.51	4.88917e-14	48h-prol-LEC	napsa
arpp19b.2	1.89149e-31	1.28993	0.806	0.598	4.7796e-27	48h-prol-LEC	arpp19b
rnaseh2a.2	2.59855e-23	1.28581	0.689	0.452	6.56627e-19	48h-prol-LEC	rnaseh2a
fah.1	2.72149e-14	1.28323	0.545	0.373	6.87693e-10	48h-prol-LEC	fah
rpa2.2	6.64627e-34	1.27866	0.868	0.686	1.67945e-29	48h-prol-LEC	rpa2
sinhcafl.2	1.83812e-24	1.27361	0.752	0.541	4.64475e-20	48h-prol-LEC	sinhcafl
cbx2.2	2.47571e-15	1.27116	0.553	0.358	6.25588e-11	48h-prol-LEC	cbx2
rnaseh2c.2	5.73874e-18	1.26057	0.531	0.32	1.45012e-13	48h-prol-LEC	rnaseh2c
tp53inp2.1	1.20824e-19	1.25862	0.693	0.473	3.0531e-15	48h-prol-LEC	tp53inp2
atad2.2	6.12573e-18	1.25226	0.773	0.632	1.54791e-13	48h-prol-LEC	atad2
si:ch73-281n10.2.2	3.23793e-58	1.25217	1	0.973	8.18193e-54	48h-prol-LEC	si:ch73-281n10.2
bcl2l16.2	2.01765e-43	1.24465	0.922	0.782	5.09841e-39	48h-prol-LEC	bcl2l16
capn12.1	2.51678e-12	1.24214	0.503	0.353	6.35964e-08	48h-prol-LEC	capn12
mxd1.2	1.34763e-14	1.2361	0.528	0.327	3.40532e-10	48h-prol-LEC	mxd1
wee1.2	1.3057e-18	1.23525	0.643	0.445	3.29937e-14	48h-prol-LEC	wee1
sema3fa.1	1.2133e-13	1.23462	0.533	0.361	3.06589e-09	48h-prol-LEC	sema3fa
spc25.2	4.92945e-20	1.22843	0.503	0.278	1.24562e-15	48h-prol-LEC	spc25
tipin.2	3.51774e-11	1.22754	0.525	0.357	8.88897e-07	48h-prol-LEC	tipin
lyve1b.2	3.17203e-45	1.22688	0.998	0.99	8.01541e-41	48h-prol-LEC	lyve1b
bub3.2	2.44242e-35	1.2258	0.874	0.67	6.17174e-31	48h-prol-LEC	bub3
dnmt3bb.1.2	1.32338e-23	1.22317	0.806	0.659	3.34404e-19	48h-prol-LEC	dnmt3bb.1
pold3.2	4.67211e-13	1.22118	0.542	0.371	1.1806e-08	48h-prol-LEC	pold3
rfc4.2	4.4936e-25	1.21695	0.834	0.653	1.13549e-20	48h-prol-LEC	rfc4
sele.2	3.06736e-28	1.21012	0.988	0.977	7.7509e-24	48h-prol-LEC	sele
rfc2.2	2.23126e-22	1.19548	0.654	0.416	5.63817e-18	48h-prol-LEC	rfc2
ctcf.2	4.84507e-22	1.18451	0.839	0.69	1.2243e-17	48h-prol-LEC	ctcf
f10.1	2.80558e-12	1.18268	0.59	0.422	7.08941e-08	48h-prol-LEC	f10
si:ch211-66k16.27.1	7.15895e-14	1.18214	0.503	0.312	1.80899e-09	48h-prol-LEC	si:ch211-66k16.27
nanos1.2	2.1955e-11	1.17954	0.522	0.364	5.5478e-07	48h-prol-LEC	nanos1
bop1.2	1.51723e-18	1.17421	0.53	0.333	3.83388e-14	48h-prol-LEC	bop1
cse1l.2	8.20487e-26	1.17345	0.866	0.745	2.07329e-21	48h-prol-LEC	cse1l
ptx3a.1	6.20731e-12	1.17238	0.545	0.39	1.56853e-07	48h-prol-LEC	ptx3a
msh2.2	7.28402e-17	1.16645	0.561	0.363	1.8406e-12	48h-prol-LEC	msh2
zgc:110239.1	3.40171e-36	1.16631	0.975	0.867	8.59578e-32	48h-prol-LEC	zgc:110239
dnajc9.2	2.20655e-20	1.16542	0.772	0.574	5.57574e-16	48h-prol-LEC	dnajc9
hpdb.1	1.57957e-12	1.16278	0.556	0.422	3.99142e-08	48h-prol-LEC	hpdb
ubr7.2	7.37923e-24	1.15732	0.8	0.627	1.86466e-19	48h-prol-LEC	ubr7
nup58.2	1.7943e-29	1.14959	0.821	0.635	4.53401e-25	48h-prol-LEC	nup58
ndc1.2	2.84745e-23	1.14883	0.719	0.534	7.19522e-19	48h-prol-LEC	ndc1
nup37.2	1.05341e-16	1.13838	0.522	0.313	2.66187e-12	48h-prol-LEC	nup37
blvrb.1	8.89697e-15	1.13649	0.593	0.442	2.24818e-10	48h-prol-LEC	blvrb
mafbb.2	6.0248e-27	1.13276	0.98	0.953	1.52241e-22	48h-prol-LEC	mafbb
orc4.2	6.15911e-21	1.1309	0.7	0.501	1.55634e-16	48h-prol-LEC	orc4
fuca1.1.1	1.76589e-19	1.12869	0.75	0.574	4.46224e-15	48h-prol-LEC	fuca1.1
znf503.1	5.02478e-20	1.12255	0.755	0.589	1.26971e-15	48h-prol-LEC	znf503
si:dkey-21c19.3.1	8.22027e-13	1.12244	0.519	0.34	2.07718e-08	48h-prol-LEC	si:dkey-21c19.3
uhrf1.2	7.87938e-24	1.11677	0.882	0.789	1.99104e-19	48h-prol-LEC	uhrf1
nsd2.2	3.81446e-15	1.11604	0.657	0.492	9.63875e-11	48h-prol-LEC	nsd2
hmgb2a.2	1.58247e-46	1.11502	0.95	0.807	3.99875e-42	48h-prol-LEC	hmgb2a
msh6.1	3.64877e-12	1.11216	0.534	0.364	9.22009e-08	48h-prol-LEC	msh6
ptgr1.1	7.27867e-19	1.10807	0.565	0.356	1.83925e-14	48h-prol-LEC	ptgr1
col1a1a.1	8.72448e-10	1.10682	0.764	0.68	2.20459e-05	48h-prol-LEC	col1a1a
gpr182.2	3.51891e-39	1.10604	1	1	8.89194e-35	48h-prol-LEC	gpr182
cthrc1a.1	4.37044e-09	1.10261	0.745	0.635	0.000110437	48h-prol-LEC	cthrc1a
il13ra2.2	7.74616e-19	1.10178	0.82	0.693	1.95738e-14	48h-prol-LEC	il13ra2
mtrex.2	1.06208e-13	1.10136	0.632	0.472	2.68377e-09	48h-prol-LEC	mtrex
tgm2b.1	1.83899e-11	1.09913	0.672	0.506	4.64694e-07	48h-prol-LEC	tgm2b
si:ch211-286o17.1.1	3.17965e-20	1.09831	0.674	0.466	8.03467e-16	48h-prol-LEC	si:ch211-286o17.1
wdhd1.2	2.14466e-18	1.09448	0.756	0.567	5.41934e-14	48h-prol-LEC	wdhd1
rcc1.2	7.35671e-16	1.09264	0.601	0.428	1.85897e-11	48h-prol-LEC	rcc1
hbbe1.1.1	2.71197e-11	1.08804	0.685	0.579	6.85289e-07	48h-prol-LEC	hbbe1.1
nup160.2	4.17637e-15	1.08656	0.671	0.516	1.05533e-10	48h-prol-LEC	nup160
si:ch211-212k18.7.1	3.32863e-09	1.08617	0.509	0.375	8.41112e-05	48h-prol-LEC	si:ch211-212k18.7
zgc:110591.2	1.50533e-25	1.08188	0.93	0.802	3.80382e-21	48h-prol-LEC	zgc:110591
anapc1.2	2.26697e-12	1.08172	0.661	0.511	5.7284e-08	48h-prol-LEC	anapc1
nup133.2	1.27934e-20	1.08158	0.756	0.559	3.23276e-16	48h-prol-LEC	nup133
nup35.1	2.69509e-11	1.07851	0.626	0.449	6.81023e-07	48h-prol-LEC	nup35
lig1.2	5.5786e-16	1.07643	0.683	0.523	1.40966e-11	48h-prol-LEC	lig1
mrc1a.2	1.98657e-37	1.07627	1	0.997	5.01987e-33	48h-prol-LEC	mrc1a
rbbp4.2	1.39336e-40	1.07328	0.986	0.95	3.52087e-36	48h-prol-LEC	rbbp4
prxl2b.2	1.34892e-15	1.07314	0.584	0.384	3.40858e-11	48h-prol-LEC	prxl2b
sumo3b.2	1.40529e-37	1.06213	0.953	0.841	3.55103e-33	48h-prol-LEC	sumo3b
cebpd.1	9.69131e-18	1.06188	0.53	0.327	2.4489e-13	48h-prol-LEC	cebpd
ndnl2.1	7.03905e-15	1.04807	0.573	0.368	1.7787e-10	48h-prol-LEC	ndnl2
strbp.2	1.42428e-13	1.04645	0.776	0.637	3.59901e-09	48h-prol-LEC	strbp
dut.2	1.62013e-26	1.04318	0.579	0.313	4.09391e-22	48h-prol-LEC	dut
btg3.2	5.52184e-16	1.04313	0.595	0.401	1.39531e-11	48h-prol-LEC	btg3
tmpoa.1	8.97114e-26	1.03894	0.885	0.749	2.26692e-21	48h-prol-LEC	tmpoa
cdc14b.2	3.69304e-17	1.03889	0.884	0.751	9.33194e-13	48h-prol-LEC	cdc14b
mxd3.2	6.32347e-07	1.03804	0.508	0.409	0.0159788	48h-prol-LEC	mxd3
prrx1a.1	3.96857e-12	1.03726	0.528	0.391	1.00282e-07	48h-prol-LEC	prrx1a
lgmn.2	3.24182e-27	1.03666	1	1	8.19176e-23	48h-prol-LEC	lgmn
ampd2a.1	1.84465e-16	1.03202	0.71	0.55	4.66124e-12	48h-prol-LEC	ampd2a
sema3fb.1	2.43703e-11	1.03101	0.55	0.398	6.15814e-07	48h-prol-LEC	sema3fb
h3f3b.1.2	1.75165e-40	1.02675	1	0.997	4.42624e-36	48h-prol-LEC	h3f3b.1
ppa1b.1	7.30997e-17	1.02591	0.637	0.465	1.84716e-12	48h-prol-LEC	ppa1b
nop2.1	1.61577e-11	1.02182	0.585	0.441	4.08288e-07	48h-prol-LEC	nop2
nup85.2	1.62114e-18	1.02122	0.655	0.453	4.09645e-14	48h-prol-LEC	nup85
mier1a.2	1.50503e-13	1.01991	0.635	0.45	3.80305e-09	48h-prol-LEC	mier1a
cdon.1	4.57117e-08	1.01794	0.669	0.593	0.00115509	48h-prol-LEC	cdon
gnpda1.2	4.20347e-07	1.01369	0.502	0.385	0.0106217	48h-prol-LEC	gnpda1
rangap1b.2	1.42074e-23	1.01204	0.697	0.465	3.59006e-19	48h-prol-LEC	rangap1b
mcm7.2	2.83623e-34	1.01135	0.995	0.966	7.16687e-30	48h-prol-LEC	mcm7
hexb.2	1.6508e-18	1.00823	0.98	0.956	4.17141e-14	48h-prol-LEC	hexb
msx3.1	1.05162e-11	1.00246	0.503	0.368	2.65734e-07	48h-prol-LEC	msx3
ctdspl3.2	5.23702e-16	1.00175	0.665	0.452	1.32334e-11	48h-prol-LEC	ctdspl3
cdk2.2	1.45209e-12	1.00023	0.762	0.633	3.66929e-08	48h-prol-LEC	cdk2
anp32b.2	1.76069e-35	1.00005	0.998	0.986	4.44909e-31	48h-prol-LEC	anp32b
wdr46.1	2.71498e-16	0.997661	0.612	0.435	6.86049e-12	48h-prol-LEC	wdr46
utp4.1	1.98886e-19	0.997458	0.517	0.314	5.02566e-15	48h-prol-LEC	utp4
si:ch211-288g17.3.2	2.39887e-37	0.996739	0.997	0.984	6.06171e-33	48h-prol-LEC	si:ch211-288g17.3
lyar.1	8.83136e-23	0.994285	0.612	0.385	2.2316e-18	48h-prol-LEC	lyar
rpa1.2	7.64646e-25	0.993753	0.975	0.939	1.93218e-20	48h-prol-LEC	rpa1
thap12a.1	1.31467e-14	0.989284	0.621	0.456	3.32204e-10	48h-prol-LEC	thap12a
wdr18.2	5.033e-16	0.987553	0.634	0.443	1.27179e-11	48h-prol-LEC	wdr18
cst14b.1.2	2.99923e-12	0.98494	0.604	0.416	7.57876e-08	48h-prol-LEC	cst14b.1
hmbsb.1	4.75734e-16	0.983148	0.596	0.436	1.20213e-11	48h-prol-LEC	hmbsb
si:ch211-156b7.4.2	1.96007e-23	0.979172	0.683	0.466	4.9529e-19	48h-prol-LEC	si:ch211-156b7.4
setdb1a.2	1.16765e-10	0.978549	0.599	0.463	2.95053e-06	48h-prol-LEC	setdb1a
ash2l.1	2.51626e-14	0.977541	0.783	0.629	6.35834e-10	48h-prol-LEC	ash2l
lonp1.2	4.08326e-16	0.977466	0.503	0.303	1.0318e-11	48h-prol-LEC	lonp1
postnb.2	4.99381e-24	0.977377	0.963	0.922	1.26189e-19	48h-prol-LEC	postnb
nutf2l.2	1.62623e-25	0.976187	0.736	0.497	4.10931e-21	48h-prol-LEC	nutf2l
hmgb2b.2	1.58042e-48	0.976073	1	0.999	3.99357e-44	48h-prol-LEC	hmgb2b
orc5.2	1.91097e-15	0.973242	0.561	0.378	4.82882e-11	48h-prol-LEC	orc5
rarab.1	4.61816e-12	0.973099	0.562	0.39	1.16696e-07	48h-prol-LEC	rarab
pds5b.2	5.10024e-10	0.97206	0.641	0.492	1.28878e-05	48h-prol-LEC	pds5b
thbs1b.1	1.18334e-17	0.969192	0.944	0.89	2.99017e-13	48h-prol-LEC	thbs1b
nup210.2	2.4239e-22	0.966953	0.795	0.644	6.12496e-18	48h-prol-LEC	nup210
pdzrn3b.1	1.17312e-10	0.957748	0.758	0.613	2.96436e-06	48h-prol-LEC	pdzrn3b
nup93.2	4.08029e-20	0.950909	0.905	0.824	1.03105e-15	48h-prol-LEC	nup93
exosc2.1	7.25339e-16	0.949725	0.509	0.3	1.83286e-11	48h-prol-LEC	exosc2
selenoh.2	1.98781e-21	0.943924	0.731	0.533	5.023e-17	48h-prol-LEC	selenoh
h2ax.2	2.75378e-16	0.941888	0.626	0.421	6.95852e-12	48h-prol-LEC	h2ax
asf1bb.2	1.04444e-23	0.940187	0.795	0.629	2.63918e-19	48h-prol-LEC	asf1bb
hnrnpa1b.1	8.70086e-16	0.938452	0.559	0.344	2.19862e-11	48h-prol-LEC	hnrnpa1b
ppan.1	4.99938e-13	0.936116	0.502	0.317	1.26329e-08	48h-prol-LEC	ppan
timp2b.1	1.88283e-15	0.933319	0.78	0.606	4.75773e-11	48h-prol-LEC	timp2b
sash1b.2	2.95253e-10	0.932578	0.755	0.618	7.46074e-06	48h-prol-LEC	sash1b
tuba8l.2	5.32403e-25	0.930268	1	1	1.34533e-20	48h-prol-LEC	tuba8l
ssb.2	5.77223e-24	0.927706	0.739	0.507	1.45859e-19	48h-prol-LEC	ssb
spen	9.00074e-06	0.925803	0.55	0.422	0.22744	48h-prol-LEC	spen
myo7aa.2	1.80128e-08	0.92579	0.665	0.551	0.000455165	48h-prol-LEC	myo7aa
nifk.2	7.25863e-11	0.925674	0.592	0.452	1.83418e-06	48h-prol-LEC	nifk
utp15.1	1.31627e-21	0.925559	0.581	0.346	3.32609e-17	48h-prol-LEC	utp15
tmem209.1	4.29883e-13	0.922946	0.789	0.653	1.08627e-08	48h-prol-LEC	tmem209
pole3.2	1.52458e-12	0.921427	0.553	0.387	3.85246e-08	48h-prol-LEC	pole3
c1qbp.2	5.50772e-13	0.919457	0.568	0.416	1.39175e-08	48h-prol-LEC	c1qbp
npm1a.2	6.25042e-21	0.915896	0.882	0.768	1.57942e-16	48h-prol-LEC	npm1a
NUP85.2	1.11521e-17	0.913649	0.568	0.348	2.81803e-13	48h-prol-LEC	NUP85
ssrp1a.2	2.72771e-20	0.911824	0.89	0.775	6.89264e-16	48h-prol-LEC	ssrp1a
umps.2	4.14394e-17	0.910847	0.556	0.373	1.04713e-12	48h-prol-LEC	umps
lman2lb.1	7.94374e-18	0.905696	0.742	0.551	2.0073e-13	48h-prol-LEC	lman2lb
slc17a5.1	2.11528e-12	0.905608	0.671	0.497	5.34511e-08	48h-prol-LEC	slc17a5
afap1l1a.1	5.32256e-15	0.902492	0.545	0.35	1.34496e-10	48h-prol-LEC	afap1l1a
cbr1l.1	2.85223e-14	0.902416	0.618	0.477	7.2073e-10	48h-prol-LEC	cbr1l
ctsz.1	1.78623e-14	0.901955	0.887	0.814	4.51363e-10	48h-prol-LEC	ctsz
men1.2	4.44972e-12	0.894411	0.602	0.452	1.1244e-07	48h-prol-LEC	men1
nrp2a.1	1.80659e-17	0.893988	0.943	0.874	4.56507e-13	48h-prol-LEC	nrp2a
rfc5.2	7.94026e-17	0.889659	0.756	0.579	2.00642e-12	48h-prol-LEC	rfc5
adssl.2	2.21669e-22	0.883853	0.874	0.729	5.60136e-18	48h-prol-LEC	adssl
ruvbl2.2	6.14395e-12	0.882425	0.548	0.385	1.55252e-07	48h-prol-LEC	ruvbl2
rnaseh2b.2	6.46511e-17	0.881609	0.556	0.326	1.63367e-12	48h-prol-LEC	rnaseh2b
mxra5b.1	1.07932e-08	0.880148	0.528	0.409	0.000272733	48h-prol-LEC	mxra5b
ddx47.2	6.89342e-18	0.879809	0.748	0.567	1.7419e-13	48h-prol-LEC	ddx47
asph.1	3.83732e-16	0.879409	0.834	0.708	9.69652e-12	48h-prol-LEC	asph
ctps1a.1	6.35187e-15	0.879067	0.913	0.88	1.60505e-10	48h-prol-LEC	ctps1a
stab1.2	3.22901e-20	0.878036	0.995	0.984	8.15939e-16	48h-prol-LEC	stab1
ogna.2	5.00406e-18	0.878	0.776	0.635	1.26448e-13	48h-prol-LEC	ogna
rfc3.2	8.98451e-15	0.875483	0.607	0.425	2.2703e-10	48h-prol-LEC	rfc3
akr1a1b.2	2.74348e-10	0.873295	0.719	0.582	6.93251e-06	48h-prol-LEC	akr1a1b
cdca7b.2	6.50218e-18	0.873046	0.733	0.552	1.64303e-13	48h-prol-LEC	cdca7b
zgc:158343.1	7.77658e-18	0.871031	0.919	0.813	1.96507e-13	48h-prol-LEC	zgc:158343
ctdspl2b.2	9.04676e-15	0.869094	0.595	0.399	2.28602e-10	48h-prol-LEC	ctdspl2b
ablim3.1	4.6665e-12	0.86871	0.523	0.339	1.17918e-07	48h-prol-LEC	ablim3
nup62l.2	4.8765e-25	0.865781	0.88	0.738	1.23224e-20	48h-prol-LEC	nup62l
dnajc5ga.1	2.83092e-13	0.864348	0.666	0.482	7.15345e-09	48h-prol-LEC	dnajc5ga
matn4.1	4.44557e-13	0.86412	0.894	0.826	1.12335e-08	48h-prol-LEC	matn4
lipf.1	1.55947e-11	0.858236	0.634	0.46	3.94062e-07	48h-prol-LEC	lipf
snu13b.2	8.24482e-20	0.857459	0.697	0.493	2.08338e-15	48h-prol-LEC	snu13b
dnmt3ba.1	1.33805e-20	0.856765	0.62	0.407	3.38112e-16	48h-prol-LEC	dnmt3ba
si:dkey-28n18.9.2	3.26246e-21	0.856616	0.988	0.946	8.24392e-17	48h-prol-LEC	si:dkey-28n18.9
htatsf1.1	7.82585e-09	0.854743	0.573	0.436	0.000197751	48h-prol-LEC	htatsf1
slit3.1	9.40702e-18	0.854313	0.724	0.511	2.37706e-13	48h-prol-LEC	slit3
pola1.2	1.29055e-20	0.853872	0.724	0.523	3.26109e-16	48h-prol-LEC	pola1
zc3hc1.1	2.35915e-08	0.851602	0.533	0.419	0.000596133	48h-prol-LEC	zc3hc1
dnajb11.1	1.03198e-18	0.851033	0.904	0.772	2.60771e-14	48h-prol-LEC	dnajb11
mybbp1a.1	5.98395e-19	0.849558	0.537	0.331	1.51209e-14	48h-prol-LEC	mybbp1a
nid2a.1	6.89811e-08	0.845658	0.565	0.453	0.00174308	48h-prol-LEC	nid2a
mars1.1	7.80736e-16	0.845242	0.755	0.61	1.97284e-11	48h-prol-LEC	mars1
anp32a.1	7.65707e-27	0.844883	0.998	0.973	1.93486e-22	48h-prol-LEC	anp32a
thop1.2	2.95513e-22	0.844881	0.86	0.721	7.46732e-18	48h-prol-LEC	thop1
samd11.1	6.77277e-14	0.843488	0.573	0.382	1.71141e-09	48h-prol-LEC	samd11
h2az2b.1	4.30794e-31	0.842542	0.998	0.977	1.08857e-26	48h-prol-LEC	h2az2b
dab2.2	1.03221e-33	0.84216	1	1	2.6083e-29	48h-prol-LEC	dab2
mmp2.2	2.52656e-14	0.839246	0.913	0.847	6.38436e-10	48h-prol-LEC	mmp2
xrcc1.1	4.91207e-07	0.838684	0.543	0.429	0.0124123	48h-prol-LEC	xrcc1
si:ch211-212k18.8.2	4.17917e-12	0.838342	0.722	0.576	1.05603e-07	48h-prol-LEC	si:ch211-212k18.8
polr2h.2	1.28525e-16	0.837101	0.506	0.289	3.24769e-12	48h-prol-LEC	polr2h
ppm1g.2	2.98326e-24	0.836166	0.949	0.86	7.5384e-20	48h-prol-LEC	ppm1g
prdx1.1	5.60008e-21	0.830791	0.955	0.864	1.41509e-16	48h-prol-LEC	prdx1
mcm5.2	1.02913e-22	0.827969	0.981	0.959	2.6005e-18	48h-prol-LEC	mcm5
zgc:112980.1	6.98357e-08	0.824276	0.542	0.391	0.00176468	48h-prol-LEC	zgc:112980
mettl2a.1	1.19744e-09	0.823728	0.508	0.348	3.02581e-05	48h-prol-LEC	mettl2a
setb.2	4.03505e-25	0.823404	0.997	0.98	1.01962e-20	48h-prol-LEC	setb
usp1.2	1.86567e-18	0.822899	0.789	0.62	4.71435e-14	48h-prol-LEC	usp1
hmgn2.2	4.66488e-43	0.821472	1	1	1.17877e-38	48h-prol-LEC	hmgn2
tubg1.2	3.29393e-20	0.819757	0.871	0.749	8.32343e-16	48h-prol-LEC	tubg1
nrf1.1	1.4092e-09	0.818015	0.663	0.506	3.56091e-05	48h-prol-LEC	nrf1
nup205.2	1.14318e-15	0.816831	0.758	0.608	2.88871e-11	48h-prol-LEC	nup205
prss16.1	1.90318e-15	0.816514	0.621	0.428	4.80915e-11	48h-prol-LEC	prss16
serpinf1.2	7.71165e-13	0.816409	0.801	0.744	1.94866e-08	48h-prol-LEC	serpinf1
ralgapa2.2	1.57755e-08	0.815077	0.804	0.72	0.000398631	48h-prol-LEC	ralgapa2
nol6.2	2.09565e-10	0.815051	0.565	0.399	5.29549e-06	48h-prol-LEC	nol6
zgc:65851.2	2.06572e-09	0.81502	0.989	0.99	5.21986e-05	48h-prol-LEC	zgc:65851
ctsba.2	2.16924e-15	0.815011	0.98	0.938	5.48146e-11	48h-prol-LEC	ctsba
ptbp2b	2.26277e-05	0.813296	0.641	0.53	0.571778	48h-prol-LEC	ptbp2b
tpcn2.1	1.26718e-07	0.812475	0.547	0.416	0.00320203	48h-prol-LEC	tpcn2
bmp16.1	4.59964e-10	0.81047	0.852	0.742	1.16228e-05	48h-prol-LEC	bmp16
prcp.2	2.32007e-26	0.810076	1	0.996	5.86259e-22	48h-prol-LEC	prcp
parp1.2	5.02714e-22	0.808653	0.817	0.664	1.27031e-17	48h-prol-LEC	parp1
mcm3.2	1.92149e-25	0.807182	0.958	0.932	4.85541e-21	48h-prol-LEC	mcm3
usp36.1	5.27441e-13	0.807047	0.615	0.46	1.33279e-08	48h-prol-LEC	usp36
mrpl45.2	3.19634e-13	0.804449	0.531	0.344	8.07684e-09	48h-prol-LEC	mrpl45
mcm4.2	2.88859e-28	0.802858	0.988	0.942	7.29917e-24	48h-prol-LEC	mcm4
fthl31.1	1.83024e-07	0.802052	0.877	0.829	0.00462483	48h-prol-LEC	fthl31
marcksa.2	2.98993e-09	0.801709	0.624	0.47	7.55525e-05	48h-prol-LEC	marcksa
mrpl16.2	3.14242e-25	0.800916	0.688	0.47	7.94059e-21	48h-prol-LEC	mrpl16
timeless.2	7.06058e-10	0.799648	0.587	0.415	1.78414e-05	48h-prol-LEC	timeless
pwp1.1	1.85519e-16	0.797314	0.516	0.305	4.68788e-12	48h-prol-LEC	pwp1
ube2g1b.1	8.90018e-13	0.796636	0.609	0.443	2.24899e-08	48h-prol-LEC	ube2g1b
kri1.1	2.34114e-12	0.795952	0.548	0.363	5.91582e-08	48h-prol-LEC	kri1
nol12.2	2.01372e-16	0.793718	0.522	0.305	5.08847e-12	48h-prol-LEC	nol12
slc20a1b.2	1.46896e-24	0.792748	0.989	0.952	3.71192e-20	48h-prol-LEC	slc20a1b
celf2.1	1.00173e-14	0.791965	0.742	0.569	2.53127e-10	48h-prol-LEC	celf2
si:ch211-122f10.4.1	5.59858e-08	0.79181	0.592	0.458	0.00141471	48h-prol-LEC	si:ch211-122f10.4
dkc1.2	4.25679e-17	0.790594	0.877	0.782	1.07565e-12	48h-prol-LEC	dkc1
hmga1a.2	1.64251e-39	0.788982	1	1	4.15045e-35	48h-prol-LEC	hmga1a
nrp2b.2	2.17176e-16	0.788976	0.997	0.976	5.48782e-12	48h-prol-LEC	nrp2b
si:ch211-66e2.3.2	3.85787e-16	0.788976	0.93	0.809	9.74846e-12	48h-prol-LEC	si:ch211-66e2.3
utp6.2	8.24774e-13	0.787875	0.512	0.331	2.08412e-08	48h-prol-LEC	utp6
zgc:152830.1	2.24923e-15	0.787547	0.927	0.87	5.68358e-11	48h-prol-LEC	zgc:152830
mapre1a.2	4.67487e-12	0.786758	0.576	0.418	1.18129e-07	48h-prol-LEC	mapre1a
rangap1a.2	5.392e-18	0.785797	0.793	0.62	1.36251e-13	48h-prol-LEC	rangap1a
aplnra.2	9.13249e-27	0.78428	1	0.996	2.30769e-22	48h-prol-LEC	aplnra
tmem176.2	1.60547e-14	0.783894	0.705	0.528	4.05686e-10	48h-prol-LEC	tmem176
snx2.2	1.44393e-16	0.783761	0.91	0.797	3.64867e-12	48h-prol-LEC	snx2
cdca7a.2	1.58386e-22	0.780772	0.916	0.806	4.00225e-18	48h-prol-LEC	cdca7a
nop58.2	1.02407e-15	0.779146	0.919	0.86	2.58771e-11	48h-prol-LEC	nop58
anapc5.2	1.49203e-17	0.778423	0.575	0.354	3.7702e-13	48h-prol-LEC	anapc5
naa40.1	9.87539e-14	0.777088	0.734	0.571	2.49541e-09	48h-prol-LEC	naa40
arrdc3b.1	4.1576e-14	0.775731	0.772	0.627	1.05059e-09	48h-prol-LEC	arrdc3b
rb1.1	8.69753e-11	0.774429	0.835	0.755	2.19778e-06	48h-prol-LEC	rb1
npm3.1	4.61605e-12	0.774291	0.582	0.397	1.16643e-07	48h-prol-LEC	npm3
lmcd1.1	4.07906e-10	0.77421	0.598	0.435	1.03074e-05	48h-prol-LEC	lmcd1
CABZ01068251.1.2	1.72016e-12	0.770507	0.517	0.344	4.34667e-08	48h-prol-LEC	CABZ01068251.1
pin1.1	8.61229e-16	0.767432	0.832	0.745	2.17624e-11	48h-prol-LEC	pin1
tfdp1b.1	1.06076e-17	0.76495	0.742	0.585	2.68042e-13	48h-prol-LEC	tfdp1b
bxdc2.2	3.17022e-15	0.764797	0.643	0.47	8.01084e-11	48h-prol-LEC	bxdc2
ahcy.1	6.5469e-25	0.762618	0.981	0.926	1.65434e-20	48h-prol-LEC	ahcy
vac14.1	4.19265e-10	0.761557	0.561	0.38	1.05944e-05	48h-prol-LEC	vac14
trim33.1	1.32271e-12	0.760076	0.526	0.348	3.34236e-08	48h-prol-LEC	trim33
thbs3b.1	1.04766e-11	0.757858	0.545	0.385	2.64733e-07	48h-prol-LEC	thbs3b
ms4a17a.9.1	6.09712e-21	0.757054	0.96	0.907	1.54068e-16	48h-prol-LEC	ms4a17a.9
ctsk.1	3.71892e-20	0.75663	0.863	0.722	9.39734e-16	48h-prol-LEC	ctsk
aldh2.2.1	2.10565e-18	0.752732	0.773	0.569	5.32076e-14	48h-prol-LEC	aldh2.2
aebp1	3.03158e-06	0.749481	0.548	0.418	0.076605	48h-prol-LEC	aebp1
aldh7a1.1	3.02302e-13	0.749037	0.736	0.618	7.63887e-09	48h-prol-LEC	aldh7a1
aars1.1	3.90841e-14	0.747791	0.78	0.646	9.87615e-10	48h-prol-LEC	aars1
mcm2.2	1.66772e-26	0.74745	0.994	0.979	4.21417e-22	48h-prol-LEC	mcm2
arl4aa.2	1.00277e-19	0.746267	0.717	0.503	2.53391e-15	48h-prol-LEC	arl4aa
uchl5.2	6.15233e-18	0.744905	0.644	0.446	1.55463e-13	48h-prol-LEC	uchl5
banf1.2	1.97776e-21	0.744669	0.924	0.813	4.9976e-17	48h-prol-LEC	banf1
xrcc6.1	1.67219e-10	0.744372	0.52	0.361	4.22545e-06	48h-prol-LEC	xrcc6
cbx3a.2	1.99221e-20	0.743204	0.902	0.783	5.03411e-16	48h-prol-LEC	cbx3a
appl2:1.1	2.77096e-10	0.743053	0.637	0.469	7.00193e-06	48h-prol-LEC	appl2:1
tmpob.1	1.66837e-14	0.743031	0.812	0.664	4.2158e-10	48h-prol-LEC	tmpob
ddx18.2	4.37757e-13	0.743009	0.689	0.561	1.10617e-08	48h-prol-LEC	ddx18
retsat.2	6.44428e-17	0.737241	0.682	0.463	1.6284e-12	48h-prol-LEC	retsat
seta.2	5.2095e-29	0.736105	0.998	0.994	1.31639e-24	48h-prol-LEC	seta
stk35.2	9.52179e-09	0.735954	0.542	0.425	0.000240606	48h-prol-LEC	stk35
prdx2.1	2.97398e-22	0.735116	0.977	0.924	7.51495e-18	48h-prol-LEC	prdx2
prodha.2	1.76233e-10	0.733084	0.519	0.354	4.45323e-06	48h-prol-LEC	prodha
prpf19.2	9.72572e-23	0.72814	0.972	0.921	2.45759e-18	48h-prol-LEC	prpf19
si:ch211-222l21.1.2	1.08967e-28	0.727375	1	1	2.75349e-24	48h-prol-LEC	si:ch211-222l21.1
smc5.1	5.29261e-14	0.72719	0.661	0.469	1.33739e-09	48h-prol-LEC	smc5
tdh.2	2.92738e-14	0.726088	0.753	0.622	7.3972e-10	48h-prol-LEC	tdh
atp5if1a.1	6.37793e-16	0.724368	0.772	0.564	1.61164e-11	48h-prol-LEC	atp5if1a
mfsd2ab.1	1.17128e-09	0.722367	0.533	0.388	2.9597e-05	48h-prol-LEC	mfsd2ab
gmps.2	8.1579e-10	0.722063	0.728	0.622	2.06142e-05	48h-prol-LEC	gmps
rab11fip1b.2	6.00285e-09	0.721457	0.536	0.388	0.000151686	48h-prol-LEC	rab11fip1b
nop56.2	1.93571e-21	0.720195	0.95	0.868	4.89134e-17	48h-prol-LEC	nop56
zfp36l1b.2	9.20811e-20	0.719723	0.998	0.994	2.3268e-15	48h-prol-LEC	zfp36l1b
slco2b1.2	1.29752e-10	0.719482	0.849	0.741	3.27869e-06	48h-prol-LEC	slco2b1
phf3.1	5.3611e-08	0.716966	0.68	0.523	0.0013547	48h-prol-LEC	phf3
rrp1.2	1.19994e-17	0.71631	0.657	0.458	3.03214e-13	48h-prol-LEC	rrp1
ctsa.1	1.26103e-09	0.714779	0.702	0.538	3.18649e-05	48h-prol-LEC	ctsa
cdk11b.1	4.29897e-10	0.714438	0.658	0.53	1.08631e-05	48h-prol-LEC	cdk11b
mcmbp.2	1.63516e-08	0.71117	0.708	0.586	0.000413188	48h-prol-LEC	mcmbp
mcm6.2	3.52996e-21	0.71099	0.933	0.867	8.91985e-17	48h-prol-LEC	mcm6
lamp2.2	1.10135e-13	0.707306	0.995	0.993	2.783e-09	48h-prol-LEC	lamp2
meox1.1	9.50723e-17	0.707117	0.713	0.541	2.40238e-12	48h-prol-LEC	meox1
pdia3.2	4.9622e-16	0.704848	0.988	0.975	1.2539e-11	48h-prol-LEC	pdia3
fbl.2	4.39797e-14	0.704262	0.752	0.605	1.11132e-09	48h-prol-LEC	fbl
alg12.2	1.54491e-12	0.703935	0.551	0.374	3.90384e-08	48h-prol-LEC	alg12
e2f4.1	2.04863e-13	0.701581	0.602	0.428	5.17667e-09	48h-prol-LEC	e2f4
hmgn7.1	3.48449e-24	0.696824	0.995	0.98	8.80495e-20	48h-prol-LEC	hmgn7
fam107b.2	6.57358e-21	0.696808	0.989	0.931	1.66108e-16	48h-prol-LEC	fam107b
atp1b1a.1	5.33734e-20	0.695926	0.994	0.958	1.34869e-15	48h-prol-LEC	atp1b1a
galns.1	2.23064e-09	0.695725	0.579	0.441	5.6366e-05	48h-prol-LEC	galns
pagr1.1	1.15539e-12	0.695612	0.663	0.489	2.91955e-08	48h-prol-LEC	pagr1
eif4ebp1.1	1.02993e-15	0.694101	0.792	0.642	2.60254e-11	48h-prol-LEC	eif4ebp1
mycn.1	3.84392e-16	0.692017	0.916	0.81	9.7132e-12	48h-prol-LEC	mycn
hcfc1b.2	5.75751e-15	0.691971	0.955	0.882	1.45487e-10	48h-prol-LEC	hcfc1b
yars1.2	2.07034e-19	0.691599	0.716	0.54	5.23154e-15	48h-prol-LEC	yars1
si:ch73-1a9.3.1	1.01858e-24	0.691564	0.967	0.884	2.57385e-20	48h-prol-LEC	si:ch73-1a9.3
tpcn3.1	2.99113e-11	0.691488	0.922	0.833	7.55828e-07	48h-prol-LEC	tpcn3
creb1a.1	4.00667e-09	0.691456	0.643	0.49	0.000101245	48h-prol-LEC	creb1a
fbln2.1	5.37976e-16	0.690248	0.606	0.394	1.35941e-11	48h-prol-LEC	fbln2
mmgt1.1	2.92124e-09	0.690218	0.705	0.564	7.38167e-05	48h-prol-LEC	mmgt1
slc25a25a.2	7.94324e-12	0.689104	0.519	0.336	2.00718e-07	48h-prol-LEC	slc25a25a
gas1a.1	1.57648e-15	0.686234	0.803	0.642	3.9836e-11	48h-prol-LEC	gas1a
flt4.2	1.31742e-15	0.684974	0.998	0.999	3.32899e-11	48h-prol-LEC	flt4
fthl28.2	4.65918e-07	0.684492	0.843	0.799	0.0117733	48h-prol-LEC	fthl28
pepd.1	5.60365e-11	0.684406	0.769	0.65	1.41599e-06	48h-prol-LEC	pepd
eif5.1	7.67635e-19	0.683852	0.963	0.892	1.93974e-14	48h-prol-LEC	eif5
slc3a2b.1	2.12841e-08	0.683467	0.646	0.551	0.000537828	48h-prol-LEC	slc3a2b
phax.1	2.74314e-10	0.682219	0.711	0.591	6.93165e-06	48h-prol-LEC	phax
riok2.1	2.97219e-11	0.681324	0.565	0.397	7.51044e-07	48h-prol-LEC	riok2
BX572619.1.1	4.30546e-15	0.67797	0.654	0.463	1.08795e-10	48h-prol-LEC	BX572619.1
creg1.1	2.87601e-14	0.677579	0.644	0.483	7.2674e-10	48h-prol-LEC	creg1
ddx39ab.2	1.95501e-24	0.677028	0.988	0.96	4.94013e-20	48h-prol-LEC	ddx39ab
tle3b.1	5.54776e-06	0.676917	0.694	0.568	0.140186	48h-prol-LEC	tle3b
ranbp1.2	7.96027e-20	0.673647	0.984	0.938	2.01148e-15	48h-prol-LEC	ranbp1
rab11bb.2	3.55855e-19	0.673333	0.989	0.952	8.99211e-15	48h-prol-LEC	rab11bb
apool.1	7.46446e-15	0.669597	0.503	0.306	1.8862e-10	48h-prol-LEC	apool
mafba.2	3.83613e-13	0.669007	0.977	0.931	9.69351e-09	48h-prol-LEC	mafba
SCARF2.1	9.438e-15	0.668391	0.705	0.518	2.38489e-10	48h-prol-LEC	SCARF2
dap3.1	2.45266e-14	0.667702	0.643	0.466	6.19762e-10	48h-prol-LEC	dap3
dhdhl.1	7.24984e-11	0.666413	0.565	0.39	1.83196e-06	48h-prol-LEC	dhdhl
si:ch211-11k18.4.1	3.5688e-14	0.66411	0.857	0.756	9.018e-10	48h-prol-LEC	si:ch211-11k18.4
hmgb1b.1	9.56874e-16	0.663818	0.957	0.894	2.41792e-11	48h-prol-LEC	hmgb1b
cycsb.1	4.25821e-12	0.663298	0.756	0.598	1.07601e-07	48h-prol-LEC	cycsb
pmp22a.1	3.08292e-20	0.663083	0.994	0.98	7.79024e-16	48h-prol-LEC	pmp22a
ldhba.1	3.59889e-14	0.662277	0.964	0.909	9.09402e-10	48h-prol-LEC	ldhba
tspy.1	6.15653e-07	0.661783	0.52	0.384	0.0155569	48h-prol-LEC	tspy
mcm3ap.1	2.08962e-08	0.660519	0.573	0.418	0.000528027	48h-prol-LEC	mcm3ap
r3hcc1l	4.08003e-09	0.660509	0.584	0.429	0.000103098	48h-prol-LEC	r3hcc1l
mrpl2.2	2.37119e-16	0.660323	0.766	0.626	5.99175e-12	48h-prol-LEC	mrpl2
tfam.2	9.35674e-11	0.65997	0.675	0.514	2.36436e-06	48h-prol-LEC	tfam
serpinh1b.1	2.60431e-10	0.659628	0.654	0.531	6.58084e-06	48h-prol-LEC	serpinh1b
adam8a.1	3.10649e-08	0.658911	0.742	0.584	0.000784978	48h-prol-LEC	adam8a
smc3.1	2.46402e-18	0.658693	0.907	0.819	6.22634e-14	48h-prol-LEC	smc3
vstm4a.1	1.68532e-12	0.65792	0.531	0.377	4.25864e-08	48h-prol-LEC	vstm4a
hmgb3b.1	2.48376e-13	0.655933	0.675	0.504	6.27623e-09	48h-prol-LEC	hmgb3b
sephs1.2	6.53249e-15	0.655365	0.8	0.691	1.65069e-10	48h-prol-LEC	sephs1
nudt21.2	2.69502e-12	0.654861	0.797	0.659	6.81005e-08	48h-prol-LEC	nudt21
phtf1.1	3.19847e-11	0.654739	0.576	0.419	8.08222e-07	48h-prol-LEC	phtf1
cd82a.1	6.74464e-13	0.652923	0.728	0.605	1.7043e-08	48h-prol-LEC	cd82a
efemp2b	1.19464e-06	0.652012	0.691	0.555	0.0301875	48h-prol-LEC	efemp2b
timm17a.1	3.57513e-10	0.649191	0.679	0.487	9.034e-06	48h-prol-LEC	timm17a
pelo.2	1.18906e-14	0.649176	0.657	0.489	3.00464e-10	48h-prol-LEC	pelo
pdcd4a.1	7.52965e-15	0.648882	0.731	0.599	1.90267e-10	48h-prol-LEC	pdcd4a
ctsd.2	4.97194e-16	0.648517	0.998	0.993	1.25636e-11	48h-prol-LEC	ctsd
iba57.1	1.71178e-12	0.6482	0.523	0.343	4.32549e-08	48h-prol-LEC	iba57
eif6.1	2.70675e-15	0.646844	0.738	0.548	6.83969e-11	48h-prol-LEC	eif6
snx1a.2	1.78168e-19	0.646803	1	0.999	4.50214e-15	48h-prol-LEC	snx1a
snrpd1.2	2.23146e-19	0.646608	0.834	0.654	5.63868e-15	48h-prol-LEC	snrpd1
cdt1.1	3.31685e-09	0.645861	0.68	0.581	8.38135e-05	48h-prol-LEC	cdt1
si:rp71-1g18.1	1.90337e-10	0.645232	0.615	0.467	4.80962e-06	48h-prol-LEC	si:rp71-1g18.1
hmbsa.1	3.11407e-14	0.645116	0.533	0.358	7.86894e-10	48h-prol-LEC	hmbsa
bcas2.1	7.2229e-13	0.644866	0.7	0.541	1.82516e-08	48h-prol-LEC	bcas2
tgm1l1.1	6.48057e-07	0.644652	0.581	0.446	0.0163758	48h-prol-LEC	tgm1l1
ranbp3b.1	1.8412e-08	0.643682	0.564	0.405	0.000465254	48h-prol-LEC	ranbp3b
si:ch211-114n24.6.2	5.60769e-15	0.64326	0.992	0.95	1.41701e-10	48h-prol-LEC	si:ch211-114n24.6
rbm12b.1	5.69136e-08	0.642828	0.537	0.398	0.00143815	48h-prol-LEC	rbm12b
dcaf13.1	2.01166e-13	0.642532	0.595	0.418	5.08326e-09	48h-prol-LEC	dcaf13
tbck	1.4523e-10	0.640635	0.562	0.398	3.66982e-06	48h-prol-LEC	tbck
si:dkey-266m15.6.1	4.4732e-09	0.640187	0.573	0.421	0.000113033	48h-prol-LEC	si:dkey-266m15.6
bhmt.1	1.19527e-12	0.639961	0.585	0.429	3.02032e-08	48h-prol-LEC	bhmt
fam210b.1	3.22229e-13	0.639957	0.745	0.612	8.1424e-09	48h-prol-LEC	fam210b
bnc2.1	7.90437e-07	0.639601	0.565	0.441	0.0199736	48h-prol-LEC	bnc2
rcn1.1	7.04932e-15	0.639136	0.772	0.663	1.78129e-10	48h-prol-LEC	rcn1
dpp7.1	3.13801e-11	0.637477	0.851	0.735	7.92944e-07	48h-prol-LEC	dpp7
uggt2	1.08718e-05	0.636274	0.643	0.544	0.27472	48h-prol-LEC	uggt2
ezh2.2	6.37139e-14	0.635427	0.801	0.698	1.60999e-09	48h-prol-LEC	ezh2
ndufa10.2	6.82314e-14	0.633444	0.874	0.749	1.72414e-09	48h-prol-LEC	ndufa10
znf318.1	2.42965e-11	0.633105	0.64	0.475	6.13948e-07	48h-prol-LEC	znf318
fzd7a.2	3.4702e-18	0.632648	0.97	0.941	8.76885e-14	48h-prol-LEC	fzd7a
got1.1	1.00464e-09	0.632536	0.719	0.602	2.53864e-05	48h-prol-LEC	got1
ptpn1.1	6.82595e-15	0.632094	0.753	0.601	1.72485e-10	48h-prol-LEC	ptpn1
hnrnpabb.1	6.31076e-24	0.631923	0.998	0.994	1.59467e-19	48h-prol-LEC	hnrnpabb
tomm34.2	3.2733e-10	0.631428	0.581	0.404	8.2713e-06	48h-prol-LEC	tomm34
zw10.2	5.36163e-13	0.631126	0.669	0.496	1.35483e-08	48h-prol-LEC	zw10
lsm7.1	7.01545e-16	0.630554	0.773	0.558	1.77274e-11	48h-prol-LEC	lsm7
si:dkey-52l18.4.2	3.82955e-16	0.629993	0.894	0.766	9.67688e-12	48h-prol-LEC	si:dkey-52l18.4
cbx5.2	2.42617e-17	0.629978	1	0.983	6.13069e-13	48h-prol-LEC	cbx5
igf2b.2	4.06569e-17	0.629918	0.761	0.582	1.02736e-12	48h-prol-LEC	igf2b
akirin2.2	2.60129e-15	0.629887	0.947	0.85	6.5732e-11	48h-prol-LEC	akirin2
ciao2a.1	8.88241e-09	0.629261	0.575	0.443	0.00022445	48h-prol-LEC	ciao2a
aldh2.1.1	2.07031e-11	0.628876	0.668	0.52	5.23147e-07	48h-prol-LEC	aldh2.1
syncripl.1	4.81093e-18	0.626903	0.898	0.756	1.21567e-13	48h-prol-LEC	syncripl
gnl3.1	6.61979e-15	0.626126	0.769	0.64	1.67275e-10	48h-prol-LEC	gnl3
ipo9.2	7.04861e-15	0.625746	0.753	0.605	1.78111e-10	48h-prol-LEC	ipo9
ing1.1	1.48067e-08	0.624415	0.55	0.399	0.00037415	48h-prol-LEC	ing1
psmd11b.2	1.99918e-17	0.623582	0.907	0.819	5.05172e-13	48h-prol-LEC	psmd11b
pfdn2.1	2.99464e-08	0.6223	0.599	0.46	0.000756715	48h-prol-LEC	pfdn2
eif2a	1.80044e-15	0.620898	0.707	0.533	4.54952e-11	48h-prol-LEC	eif2a
dnm1l.1	2.44575e-08	0.620835	0.602	0.46	0.000618018	48h-prol-LEC	dnm1l
drg1.2	4.95947e-19	0.618512	0.842	0.687	1.25321e-14	48h-prol-LEC	drg1
cst14a.2.2	3.65551e-09	0.617722	0.761	0.625	9.23712e-05	48h-prol-LEC	cst14a.2
hoxa4a.1	3.64462e-13	0.617513	0.654	0.473	9.20959e-09	48h-prol-LEC	hoxa4a
ppih.2	8.59681e-17	0.615352	0.64	0.415	2.17233e-12	48h-prol-LEC	ppih
mrps36	7.03203e-07	0.614014	0.519	0.371	0.0177692	48h-prol-LEC	mrps36
rars1.1	2.72808e-14	0.611644	0.783	0.669	6.89359e-10	48h-prol-LEC	rars1
nrip1b.1	7.49814e-07	0.61151	0.734	0.642	0.018947	48h-prol-LEC	nrip1b
pleca.1	2.76905e-09	0.611396	0.733	0.609	6.99711e-05	48h-prol-LEC	pleca
kmt5c.1	3.10723e-13	0.609811	0.654	0.479	7.85166e-09	48h-prol-LEC	kmt5c
mapk14a.2	2.68987e-09	0.609505	0.807	0.693	6.79704e-05	48h-prol-LEC	mapk14a
hm13.1	1.04013e-15	0.609216	0.98	0.924	2.6283e-11	48h-prol-LEC	hm13
nr2f1a.2	4.06397e-12	0.609049	0.977	0.941	1.02693e-07	48h-prol-LEC	nr2f1a
rpl7l1.2	1.62221e-13	0.608266	0.727	0.544	4.09916e-09	48h-prol-LEC	rpl7l1
si:ch211-74m13.1	5.27659e-10	0.608056	0.716	0.582	1.33334e-05	48h-prol-LEC	si:ch211-74m13.1
pphln1.1	1.18993e-11	0.606881	0.738	0.562	3.00684e-07	48h-prol-LEC	pphln1
ruvbl1.1	1.84266e-14	0.606343	0.755	0.616	4.65622e-10	48h-prol-LEC	ruvbl1
dnajc11a.2	1.81801e-11	0.606179	0.576	0.425	4.59394e-07	48h-prol-LEC	dnajc11a
ergic3.1	3.34569e-10	0.605748	0.657	0.507	8.45422e-06	48h-prol-LEC	ergic3
rnf168.1	1.15003e-07	0.604975	0.685	0.557	0.00290601	48h-prol-LEC	rnf168
cnbpa.2	2.76407e-19	0.604686	0.986	0.942	6.98452e-15	48h-prol-LEC	cnbpa
slc9a7.1	5.26502e-09	0.604326	0.787	0.677	0.000133042	48h-prol-LEC	slc9a7
pld7.1	2.00937e-11	0.603708	0.651	0.47	5.07747e-07	48h-prol-LEC	pld7
atp6ap1b.1	1.28011e-11	0.603496	0.929	0.86	3.23472e-07	48h-prol-LEC	atp6ap1b
parp2.1	1.36857e-10	0.603352	0.516	0.361	3.45824e-06	48h-prol-LEC	parp2
clgn.2	3.11847e-09	0.602229	0.798	0.718	7.88005e-05	48h-prol-LEC	clgn
tefa.1	3.54526e-11	0.601857	0.724	0.533	8.95852e-07	48h-prol-LEC	tefa
odc1.2	1.03895e-23	0.601628	0.991	0.952	2.62532e-19	48h-prol-LEC	odc1
ms4a17a.11.1	9.37877e-11	0.601411	0.828	0.708	2.36992e-06	48h-prol-LEC	ms4a17a.11
aprt.1	1.038e-10	0.601137	0.512	0.348	2.62293e-06	48h-prol-LEC	aprt
kirrel3l.2	2.25217e-17	0.601086	1	0.994	5.69101e-13	48h-prol-LEC	kirrel3l
ckap5.2	1.11993e-15	0.600846	0.792	0.646	2.82996e-11	48h-prol-LEC	ckap5
pspc1.1	4.20563e-12	0.600107	0.651	0.472	1.06272e-07	48h-prol-LEC	pspc1
mrpl4.1	1.46614e-09	0.598198	0.551	0.381	3.70478e-05	48h-prol-LEC	mrpl4
smarca5.2	4.4668e-14	0.59745	0.981	0.949	1.12871e-09	48h-prol-LEC	smarca5
si:ch73-311h14.2.1	1.34634e-08	0.597424	0.562	0.409	0.000340207	48h-prol-LEC	si:ch73-311h14.2
scamp4.1	2.40733e-13	0.596917	0.894	0.819	6.08309e-09	48h-prol-LEC	scamp4
marcksb.1	8.64177e-19	0.596782	0.98	0.938	2.18369e-14	48h-prol-LEC	marcksb
mrpl12.2	6.11226e-12	0.596614	0.585	0.443	1.54451e-07	48h-prol-LEC	mrpl12
metrnla.1	9.89741e-13	0.595828	0.747	0.589	2.50098e-08	48h-prol-LEC	metrnla
ccnt2a.1	6.9637e-06	0.594985	0.502	0.391	0.175966	48h-prol-LEC	ccnt2a
snrpb.2	1.13721e-18	0.594416	0.991	0.952	2.87361e-14	48h-prol-LEC	snrpb
tecrb.1	1.09834e-09	0.593257	0.596	0.445	2.77539e-05	48h-prol-LEC	tecrb
pdcd11.1	4.37075e-17	0.593215	0.53	0.32	1.10444e-12	48h-prol-LEC	pdcd11
usp39.2	3.28334e-17	0.59177	0.745	0.554	8.29667e-13	48h-prol-LEC	usp39
sub1b.2	1.37976e-11	0.591724	0.514	0.339	3.48651e-07	48h-prol-LEC	sub1b
slc38a7.1	1.69849e-08	0.590936	0.634	0.482	0.000429191	48h-prol-LEC	slc38a7
srrt.2	4.87268e-14	0.590625	0.783	0.656	1.23128e-09	48h-prol-LEC	srrt
tubgcp4.1	2.6494e-08	0.589584	0.54	0.381	0.000669476	48h-prol-LEC	tubgcp4
orc3.2	2.77817e-12	0.588731	0.533	0.353	7.02016e-08	48h-prol-LEC	orc3
isg20.2	5.22538e-15	0.588274	0.55	0.371	1.3204e-10	48h-prol-LEC	isg20
mbd3b.1	9.72632e-11	0.588203	0.585	0.411	2.45774e-06	48h-prol-LEC	mbd3b
phgdh.1	1.38378e-12	0.586152	0.651	0.535	3.49668e-08	48h-prol-LEC	phgdh
tmem39b.1	1.05073e-09	0.586097	0.599	0.459	2.65508e-05	48h-prol-LEC	tmem39b
agfg1a.1	4.39083e-06	0.585771	0.554	0.442	0.110952	48h-prol-LEC	agfg1a
vars1.1	4.08745e-12	0.583591	0.679	0.558	1.03286e-07	48h-prol-LEC	vars1
tdrd3.1	4.16883e-09	0.583518	0.537	0.371	0.000105342	48h-prol-LEC	tdrd3
wdr36.2	4.90643e-13	0.583509	0.599	0.455	1.2398e-08	48h-prol-LEC	wdr36
prmt1.1	1.55389e-17	0.582503	0.992	0.953	3.92652e-13	48h-prol-LEC	prmt1
magoh.1	1.04068e-12	0.582218	0.609	0.426	2.6297e-08	48h-prol-LEC	magoh
paxip1.1	6.86878e-08	0.582182	0.595	0.462	0.00173567	48h-prol-LEC	paxip1
mrgbp.1	1.17986e-08	0.581539	0.503	0.347	0.000298139	48h-prol-LEC	mrgbp
cryl1.1	7.16361e-10	0.581514	0.593	0.433	1.81017e-05	48h-prol-LEC	cryl1
mat2aa.1	6.28175e-16	0.581444	0.879	0.751	1.58733e-11	48h-prol-LEC	mat2aa
gpc4.1	4.2775e-11	0.581392	0.784	0.663	1.08088e-06	48h-prol-LEC	gpc4
fam91a1	1.15898e-07	0.581088	0.567	0.449	0.00292864	48h-prol-LEC	fam91a1
rrs1.1	3.47155e-17	0.580885	0.638	0.446	8.77225e-13	48h-prol-LEC	rrs1
naga.1	1.01912e-11	0.580686	0.958	0.909	2.57522e-07	48h-prol-LEC	naga
ran.1	1.17541e-19	0.580577	1	0.999	2.97014e-15	48h-prol-LEC	ran
bysl.2	8.76299e-14	0.579778	0.766	0.629	2.21432e-09	48h-prol-LEC	bysl
emd.1	2.31466e-10	0.579653	0.68	0.513	5.84893e-06	48h-prol-LEC	emd
uba2.2	1.05912e-16	0.579172	0.921	0.824	2.67628e-12	48h-prol-LEC	uba2
ncl.2	1.02542e-15	0.579062	0.932	0.919	2.59113e-11	48h-prol-LEC	ncl
zgc:153018.2	1.17255e-06	0.577427	0.548	0.414	0.0296292	48h-prol-LEC	zgc:153018
tuba8l4.2	1.09593e-14	0.576424	1	1	2.76931e-10	48h-prol-LEC	tuba8l4
slc43a1a.2	1.25303e-13	0.575052	0.888	0.8	3.16629e-09	48h-prol-LEC	slc43a1a
nap1l4a.1	4.9256e-13	0.57364	0.545	0.377	1.24465e-08	48h-prol-LEC	nap1l4a
mtor	3.39209e-08	0.573417	0.533	0.385	0.000857148	48h-prol-LEC	mtor
gars1.2	3.51147e-22	0.572465	0.958	0.888	8.87314e-18	48h-prol-LEC	gars1
lmnb2.1	5.89419e-12	0.572437	0.803	0.632	1.4894e-07	48h-prol-LEC	lmnb2
taldo1.1	1.72827e-16	0.571525	0.96	0.899	4.36717e-12	48h-prol-LEC	taldo1
terfa	1.0225e-08	0.571004	0.717	0.575	0.000258374	48h-prol-LEC	terfa
slc10a7.1	1.09346e-09	0.57048	0.607	0.446	2.76306e-05	48h-prol-LEC	slc10a7
nelfb.1	2.64328e-08	0.56837	0.595	0.456	0.00066793	48h-prol-LEC	nelfb
eif3jb.2	2.52691e-10	0.56821	0.531	0.363	6.38526e-06	48h-prol-LEC	eif3jb
prpf8.1	3.97111e-17	0.568108	0.884	0.744	1.00346e-12	48h-prol-LEC	prpf8
tlr5b.1	1.3437e-07	0.567895	0.581	0.433	0.00339539	48h-prol-LEC	tlr5b
u2af1.1	2.52695e-11	0.56771	0.679	0.507	6.38536e-07	48h-prol-LEC	u2af1
lmnb1.2	2.04009e-21	0.566444	0.958	0.881	5.15511e-17	48h-prol-LEC	lmnb1
pa2g4b.1	1.51365e-16	0.565833	0.984	0.932	3.82483e-12	48h-prol-LEC	pa2g4b
smg7.1	1.76596e-08	0.565561	0.609	0.462	0.000446241	48h-prol-LEC	smg7
tex10	1.12832e-09	0.564281	0.738	0.636	2.85115e-05	48h-prol-LEC	tex10
tent4b.1	1.01877e-07	0.563251	0.575	0.448	0.00257433	48h-prol-LEC	tent4b
bmp6.1	6.63176e-06	0.562877	0.505	0.397	0.167578	48h-prol-LEC	bmp6
cpvl.1	7.48731e-15	0.562538	0.901	0.759	1.89197e-10	48h-prol-LEC	cpvl
fam76b.1	1.81888e-15	0.562334	0.876	0.792	4.59613e-11	48h-prol-LEC	fam76b
naa15a.1	7.03086e-17	0.562251	0.758	0.596	1.77663e-12	48h-prol-LEC	naa15a
lgals3b.1	1.00557e-12	0.561954	0.731	0.613	2.54096e-08	48h-prol-LEC	lgals3b
tubb4b.2	3.65395e-19	0.561592	1	1	9.23316e-15	48h-prol-LEC	tubb4b
mdh1aa.1	3.90793e-11	0.56144	0.89	0.84	9.87495e-07	48h-prol-LEC	mdh1aa
srsf2a.1	1.80226e-16	0.560627	0.997	0.982	4.55412e-12	48h-prol-LEC	srsf2a
tsc22d1	1.33667e-08	0.560564	0.567	0.415	0.000337763	48h-prol-LEC	tsc22d1
cdc16.1	1.23607e-09	0.560025	0.525	0.354	3.12341e-05	48h-prol-LEC	cdc16
hspd1.2	3.25588e-18	0.559961	0.873	0.754	8.22729e-14	48h-prol-LEC	hspd1
pa2g4a.2	2.89011e-15	0.559736	0.911	0.83	7.30301e-11	48h-prol-LEC	pa2g4a
scpep1.1	1.08903e-11	0.559453	0.817	0.727	2.75188e-07	48h-prol-LEC	scpep1
rbm4.3.1	1.28427e-07	0.558843	0.571	0.424	0.00324522	48h-prol-LEC	rbm4.3
alad.2	8.55216e-16	0.557844	0.705	0.516	2.16105e-11	48h-prol-LEC	alad
meis2a:1.1	3.5391e-13	0.556476	0.806	0.63	8.94296e-09	48h-prol-LEC	meis2a:1
MYG1.2	2.11757e-14	0.556088	0.88	0.79	5.3509e-10	48h-prol-LEC	MYG1
tbc1d1.1	7.93749e-07	0.554956	0.62	0.489	0.0200572	48h-prol-LEC	tbc1d1
f2r.1	1.76569e-08	0.553798	0.655	0.511	0.000446172	48h-prol-LEC	f2r
abcf1.1	3.88465e-17	0.553248	0.825	0.708	9.81613e-13	48h-prol-LEC	abcf1
tmed1b.1	4.10215e-11	0.553238	0.559	0.392	1.03657e-06	48h-prol-LEC	tmed1b
dock7.1	3.89686e-06	0.55282	0.537	0.382	0.0984697	48h-prol-LEC	dock7
flrt2.1	2.67813e-10	0.552257	0.602	0.432	6.76737e-06	48h-prol-LEC	flrt2
entpd1.1	3.92023e-13	0.551696	0.975	0.938	9.90603e-09	48h-prol-LEC	entpd1
dhrs13a.3.1	2.7254e-07	0.551351	0.587	0.456	0.0068868	48h-prol-LEC	dhrs13a.3
gsta.1.1	8.84802e-12	0.55042	0.508	0.309	2.2358e-07	48h-prol-LEC	gsta.1
cnbpb.2	2.40904e-15	0.550207	0.988	0.95	6.08741e-11	48h-prol-LEC	cnbpb
nme3.1	5.91412e-08	0.549002	0.53	0.371	0.00149444	48h-prol-LEC	nme3
lmf2b.2	1.92864e-15	0.548494	0.955	0.874	4.87347e-11	48h-prol-LEC	lmf2b
rbm42.1	1.80955e-08	0.54836	0.612	0.479	0.000457254	48h-prol-LEC	rbm42
ERC1	6.41344e-07	0.548242	0.537	0.392	0.0162061	48h-prol-LEC	ERC1
glud1a.1	8.72574e-09	0.547958	0.946	0.905	0.000220491	48h-prol-LEC	glud1a
selenbp1.1	6.94225e-13	0.547248	0.918	0.844	1.75424e-08	48h-prol-LEC	selenbp1
med6.1	5.92385e-11	0.546622	0.651	0.475	1.4969e-06	48h-prol-LEC	med6
eif2b3.1	1.88147e-08	0.54555	0.607	0.448	0.000475427	48h-prol-LEC	eif2b3
hars.2	3.04545e-19	0.544506	0.908	0.805	7.69555e-15	48h-prol-LEC	hars
jade3.1	3.45966e-11	0.543463	0.696	0.554	8.74222e-07	48h-prol-LEC	jade3
stag2b.2	9.1072e-14	0.543274	0.994	0.975	2.3013e-09	48h-prol-LEC	stag2b
sigmar1	2.60957e-06	0.542914	0.615	0.486	0.0659412	48h-prol-LEC	sigmar1
heatr3.1	7.84048e-11	0.540641	0.543	0.402	1.98121e-06	48h-prol-LEC	heatr3
casp20.1	1.49371e-09	0.540464	0.621	0.448	3.77447e-05	48h-prol-LEC	casp20
eri1.1	1.63346e-12	0.538519	0.561	0.378	4.1276e-08	48h-prol-LEC	eri1
iars1.1	9.62136e-15	0.538238	0.769	0.663	2.43122e-10	48h-prol-LEC	iars1
si:ch73-334d15.1.1	2.61863e-11	0.538187	0.682	0.518	6.61702e-07	48h-prol-LEC	si:ch73-334d15.1
wdr75.2	1.29289e-20	0.537775	0.64	0.404	3.26701e-16	48h-prol-LEC	wdr75
mta3.1	8.20401e-10	0.537292	0.727	0.591	2.07307e-05	48h-prol-LEC	mta3
lsm3.1	2.73277e-08	0.535803	0.511	0.353	0.000690544	48h-prol-LEC	lsm3
hadh.1	6.72067e-10	0.535511	0.829	0.695	1.69825e-05	48h-prol-LEC	hadh
atf4a.2	2.74351e-11	0.534576	0.915	0.834	6.93258e-07	48h-prol-LEC	atf4a
foxp4.2	9.09154e-15	0.534239	0.88	0.768	2.29734e-10	48h-prol-LEC	foxp4
tpst1l.1	4.06036e-10	0.533702	0.689	0.567	1.02601e-05	48h-prol-LEC	tpst1l
prdx6.2	5.74974e-14	0.533154	0.551	0.367	1.4529e-09	48h-prol-LEC	prdx6
tomm20a:1.2	1.82704e-13	0.532492	0.672	0.492	4.61676e-09	48h-prol-LEC	tomm20a:1
hmgb3a.2	3.20412e-13	0.532233	0.995	0.948	8.0965e-09	48h-prol-LEC	hmgb3a
cnot3a.1	6.20261e-06	0.531626	0.599	0.46	0.156734	48h-prol-LEC	cnot3a
snrnp200.2	1.21809e-14	0.530812	0.767	0.592	3.078e-10	48h-prol-LEC	snrnp200
lfng.2	2.98563e-08	0.529833	0.998	0.992	0.000754438	48h-prol-LEC	lfng
dcn.1	3.357e-09	0.529304	0.894	0.841	8.48281e-05	48h-prol-LEC	dcn
slc12a7b.2	5.74542e-08	0.527953	0.89	0.83	0.00145181	48h-prol-LEC	slc12a7b
hhex.2	1.11679e-13	0.527704	0.964	0.921	2.82202e-09	48h-prol-LEC	hhex
aqp7.1	1.00225e-08	0.527297	0.637	0.483	0.000253257	48h-prol-LEC	aqp7
aldob.1	8.65969e-10	0.526499	0.52	0.394	2.18822e-05	48h-prol-LEC	aldob
tmem9b	6.53914e-06	0.525654	0.674	0.535	0.165237	48h-prol-LEC	tmem9b
med24.1	7.26928e-14	0.525155	0.607	0.426	1.83687e-09	48h-prol-LEC	med24
decr1.1	6.54978e-09	0.52513	0.585	0.436	0.000165506	48h-prol-LEC	decr1
bloc1s6.2	1.29236e-10	0.525113	0.607	0.425	3.26565e-06	48h-prol-LEC	bloc1s6
metrnlb.1	3.54303e-08	0.524902	0.842	0.744	0.000895289	48h-prol-LEC	metrnlb
smarcad1a.1	9.76112e-11	0.523506	0.668	0.51	2.46654e-06	48h-prol-LEC	smarcad1a
got2b.1	3.48241e-13	0.523332	0.787	0.666	8.7997e-09	48h-prol-LEC	got2b
akr7a3.1	6.26378e-10	0.523003	0.601	0.483	1.5828e-05	48h-prol-LEC	akr7a3
zc3h7a.1	3.90819e-12	0.521341	0.557	0.382	9.87561e-08	48h-prol-LEC	zc3h7a
usp22.1	1.63481e-10	0.521243	0.526	0.341	4.131e-06	48h-prol-LEC	usp22
psme3.1	9.7571e-16	0.517953	0.714	0.547	2.46552e-11	48h-prol-LEC	psme3
cbx1a.2	3.84038e-09	0.516438	0.845	0.746	9.70425e-05	48h-prol-LEC	cbx1a
prmt5.2	2.63892e-15	0.516269	0.688	0.501	6.66829e-11	48h-prol-LEC	prmt5
ints10.1	1.59333e-09	0.516076	0.596	0.436	4.02618e-05	48h-prol-LEC	ints10
fkbp3.1	3.78483e-12	0.515971	0.803	0.643	9.56389e-08	48h-prol-LEC	fkbp3
snrnp40.1	4.5455e-13	0.515479	0.776	0.657	1.1486e-08	48h-prol-LEC	snrnp40
mych.2	5.7194e-14	0.514969	0.767	0.656	1.44524e-09	48h-prol-LEC	mych
mhc1zba.1	9.60993e-09	0.514386	0.523	0.397	0.000242833	48h-prol-LEC	mhc1zba
mfap2.1	4.24657e-11	0.512699	0.7	0.569	1.07307e-06	48h-prol-LEC	mfap2
asah1b.1	2.41748e-10	0.511958	0.7	0.535	6.10872e-06	48h-prol-LEC	asah1b
gask1b.1	3.55363e-13	0.511411	0.994	0.966	8.97967e-09	48h-prol-LEC	gask1b
si:ch211-214j24.10.1	6.95656e-13	0.510655	0.815	0.69	1.75785e-08	48h-prol-LEC	si:ch211-214j24.10
pcid2.1	5.2633e-11	0.510197	0.689	0.528	1.32998e-06	48h-prol-LEC	pcid2
dcp2.1	1.16746e-11	0.509288	0.643	0.459	2.95005e-07	48h-prol-LEC	dcp2
nsun2.1	1.03149e-17	0.509211	0.644	0.424	2.60647e-13	48h-prol-LEC	nsun2
sdc2.2	3.39694e-11	0.509131	0.61	0.442	8.58372e-07	48h-prol-LEC	sdc2
nup107.2	4.26917e-12	0.507673	0.848	0.789	1.07878e-07	48h-prol-LEC	nup107
si:dkey-111e8.1.1	1.07354e-12	0.507295	0.52	0.331	2.71272e-08	48h-prol-LEC	si:dkey-111e8.1
rbb4l.1	1.33224e-13	0.506989	0.941	0.874	3.36643e-09	48h-prol-LEC	rbb4l
naa25.2	1.87273e-11	0.506592	0.595	0.416	4.73221e-07	48h-prol-LEC	naa25
golt1bb.1	3.27434e-11	0.506048	0.68	0.476	8.27393e-07	48h-prol-LEC	golt1bb
sh3tc2.2	1.3339e-06	0.50589	0.988	0.973	0.0337064	48h-prol-LEC	sh3tc2
adka.2	7.83031e-09	0.505333	0.666	0.537	0.000197864	48h-prol-LEC	adka
nudc.1	8.07142e-08	0.504455	0.787	0.72	0.00203957	48h-prol-LEC	nudc
morc2.1	2.5364e-08	0.504335	0.637	0.496	0.000640924	48h-prol-LEC	morc2
dpp3.1	7.30696e-09	0.503047	0.795	0.712	0.00018464	48h-prol-LEC	dpp3
get3.1	2.65296e-05	0.502848	0.629	0.523	0.670376	48h-prol-LEC	get3
edc4.1	5.28149e-09	0.502807	0.514	0.354	0.000133458	48h-prol-LEC	edc4
prr12a	1.69293e-10	0.502775	0.8	0.673	4.27785e-06	48h-prol-LEC	prr12a
ctnnbl1.1	9.95497e-16	0.502562	0.814	0.666	2.51552e-11	48h-prol-LEC	ctnnbl1
poglut3.1	5.69746e-10	0.501766	0.505	0.331	1.43969e-05	48h-prol-LEC	poglut3
dact2.1	1.85267e-06	0.501314	0.702	0.601	0.0468151	48h-prol-LEC	dact2
zgc:109744.2	2.73877e-13	0.500034	0.581	0.387	6.92059e-09	48h-prol-LEC	zgc:109744
BX649250.2.1	7.75431e-08	0.499956	0.54	0.407	0.00195944	48h-prol-LEC	BX649250.2
sb:cb81.1	8.65079e-11	0.499913	0.787	0.69	2.18597e-06	48h-prol-LEC	sb:cb81
xpo4.1	7.83783e-10	0.499202	0.573	0.424	1.98054e-05	48h-prol-LEC	xpo4
ppil2.2	2.17408e-13	0.499135	0.626	0.435	5.49367e-09	48h-prol-LEC	ppil2
abce1.2	7.25885e-19	0.49774	0.98	0.959	1.83424e-14	48h-prol-LEC	abce1
nat9.1	9.0987e-07	0.497599	0.52	0.385	0.0229915	48h-prol-LEC	nat9
nktr.1	5.18686e-07	0.496976	0.585	0.433	0.0131067	48h-prol-LEC	nktr
hnrnpa0b.1	6.88359e-10	0.496485	0.935	0.834	1.73942e-05	48h-prol-LEC	hnrnpa0b
carhsp1.2	2.11323e-14	0.496154	0.935	0.81	5.33992e-10	48h-prol-LEC	carhsp1
chst2a.1	9.25414e-08	0.494615	0.567	0.424	0.00233843	48h-prol-LEC	chst2a
lin54.1	1.64774e-07	0.494467	0.587	0.448	0.00416367	48h-prol-LEC	lin54
slc16a10.1	2.67125e-13	0.494291	0.745	0.605	6.74999e-09	48h-prol-LEC	slc16a10
gamt.2	2.7403e-07	0.493448	0.506	0.361	0.00692445	48h-prol-LEC	gamt
camk2g2.1	3.18915e-10	0.492959	0.669	0.507	8.05867e-06	48h-prol-LEC	camk2g2
pacc1.1	2.01893e-10	0.492728	0.568	0.378	5.10164e-06	48h-prol-LEC	pacc1
gpsm2.1	7.39681e-07	0.492615	0.696	0.589	0.018691	48h-prol-LEC	gpsm2
znf703.1	1.44885e-10	0.491621	0.925	0.88	3.6611e-06	48h-prol-LEC	znf703
flad1.1	1.77622e-10	0.490684	0.682	0.508	4.48834e-06	48h-prol-LEC	flad1
ubxn1.1	6.36305e-11	0.490349	0.755	0.599	1.60788e-06	48h-prol-LEC	ubxn1
hexa.1	3.40973e-15	0.490067	0.734	0.557	8.61604e-11	48h-prol-LEC	hexa
cog2.1	6.19404e-10	0.489134	0.547	0.381	1.56517e-05	48h-prol-LEC	cog2
ddx10.1	6.35464e-12	0.489124	0.55	0.381	1.60575e-07	48h-prol-LEC	ddx10
ubap2l.1	9.21155e-06	0.48908	0.592	0.459	0.232767	48h-prol-LEC	ubap2l
mrpl44	3.07495e-10	0.4888	0.64	0.499	7.77008e-06	48h-prol-LEC	mrpl44
zc3h15.2	3.55132e-12	0.487639	0.786	0.664	8.97384e-08	48h-prol-LEC	zc3h15
nap1l1.2	1.0374e-13	0.487538	0.992	0.977	2.6214e-09	48h-prol-LEC	nap1l1
rpf2.1	1.20131e-13	0.486369	0.641	0.493	3.0356e-09	48h-prol-LEC	rpf2
eif2s1a.2	3.93784e-13	0.483261	0.77	0.642	9.95052e-09	48h-prol-LEC	eif2s1a
bckdhb.1	9.74802e-13	0.482932	0.807	0.667	2.46323e-08	48h-prol-LEC	bckdhb
hspa5.1	1.31967e-12	0.482932	0.991	0.969	3.33466e-08	48h-prol-LEC	hspa5
nup54.1	9.74796e-11	0.482837	0.764	0.66	2.46321e-06	48h-prol-LEC	nup54
slc35e1.1	2.40708e-09	0.482266	0.559	0.398	6.08245e-05	48h-prol-LEC	slc35e1
cyth3a.1	1.35178e-06	0.481659	0.792	0.703	0.0341582	48h-prol-LEC	cyth3a
dnttip2.2	3.78413e-15	0.481132	0.64	0.477	9.56212e-11	48h-prol-LEC	dnttip2
psmd9.1	1.89713e-10	0.480603	0.581	0.416	4.79385e-06	48h-prol-LEC	psmd9
kars1.1	7.0506e-17	0.480442	0.992	0.973	1.78162e-12	48h-prol-LEC	kars1
caskb.1	4.87302e-07	0.48019	0.638	0.513	0.0123136	48h-prol-LEC	caskb
med14.1	5.83769e-06	0.479014	0.651	0.551	0.147513	48h-prol-LEC	med14
tle2a.1	1.21814e-12	0.478357	0.894	0.752	3.07811e-08	48h-prol-LEC	tle2a
nfs1.1	1.38404e-12	0.477924	0.508	0.341	3.49733e-08	48h-prol-LEC	nfs1
pfn1.1	1.44572e-05	0.47781	0.96	0.935	0.365319	48h-prol-LEC	pfn1
qdpra	5.62074e-08	0.477283	0.545	0.443	0.00142031	48h-prol-LEC	qdpra
ppp4r3b.1	7.02586e-10	0.476866	0.874	0.769	1.77536e-05	48h-prol-LEC	ppp4r3b
stambpa	6.45029e-12	0.476801	0.561	0.394	1.62992e-07	48h-prol-LEC	stambpa
kpnb3.2	3.98904e-11	0.474697	0.915	0.853	1.00799e-06	48h-prol-LEC	kpnb3
prps1b.1	4.24221e-09	0.474448	0.635	0.484	0.000107196	48h-prol-LEC	prps1b
ehmt1b.1	2.70813e-10	0.473491	0.565	0.384	6.84317e-06	48h-prol-LEC	ehmt1b
pcf11.1	3.49231e-08	0.472395	0.668	0.54	0.000882472	48h-prol-LEC	pcf11
sec13.1	2.30124e-09	0.472391	0.789	0.688	5.815e-05	48h-prol-LEC	sec13
drap1.1	2.63643e-12	0.472181	0.97	0.914	6.662e-08	48h-prol-LEC	drap1
PLBD2.1	1.15935e-12	0.471988	0.705	0.523	2.92957e-08	48h-prol-LEC	PLBD2
srsf1a.1	9.87894e-12	0.471335	0.957	0.895	2.49631e-07	48h-prol-LEC	srsf1a
CABZ01054965.1.1	2.51745e-07	0.470931	0.592	0.455	0.00636133	48h-prol-LEC	CABZ01054965.1
nenf.1	5.26706e-09	0.470846	0.578	0.422	0.000133093	48h-prol-LEC	nenf
glula.2	9.85089e-14	0.470569	0.986	0.932	2.48922e-09	48h-prol-LEC	glula
klf12a.1	1.3025e-09	0.470549	0.766	0.635	3.29129e-05	48h-prol-LEC	klf12a
atox1.2	6.18162e-06	0.470396	0.576	0.431	0.156203	48h-prol-LEC	atox1
clta.2	1.42831e-10	0.470156	0.998	0.993	3.6092e-06	48h-prol-LEC	clta
fth1a.1	4.00575e-16	0.469716	1	0.989	1.01221e-11	48h-prol-LEC	fth1a
sox11a.1	2.02544e-07	0.469657	0.811	0.735	0.0051181	48h-prol-LEC	sox11a
sec22a.1	3.13348e-07	0.468935	0.516	0.377	0.00791799	48h-prol-LEC	sec22a
hcfc1a.2	4.23092e-17	0.468604	0.887	0.741	1.06911e-12	48h-prol-LEC	hcfc1a
srprb.1	3.31793e-08	0.468472	0.556	0.411	0.000838409	48h-prol-LEC	srprb
cnot8.1	1.75209e-11	0.466358	0.693	0.544	4.42734e-07	48h-prol-LEC	cnot8
mrps34	2.86292e-15	0.465632	0.589	0.387	7.23431e-11	48h-prol-LEC	mrps34
ddx39aa.1	2.06194e-12	0.465589	0.986	0.945	5.21032e-08	48h-prol-LEC	ddx39aa
banp.1	4.05882e-08	0.464224	0.53	0.391	0.00102562	48h-prol-LEC	banp
fbxw4.1	7.3149e-10	0.463277	0.511	0.347	1.8484e-05	48h-prol-LEC	fbxw4
pabpc1b	1.15212e-07	0.462699	0.621	0.52	0.00291129	48h-prol-LEC	pabpc1b
rbms1a.2	2.98852e-10	0.462482	0.919	0.874	7.55169e-06	48h-prol-LEC	rbms1a
urod.1	1.92036e-17	0.462069	0.739	0.578	4.85256e-13	48h-prol-LEC	urod
fzr1a	3.07104e-13	0.461411	0.857	0.748	7.7602e-09	48h-prol-LEC	fzr1a
adsl.1	1.22144e-10	0.461	0.812	0.681	3.08646e-06	48h-prol-LEC	adsl
mrpl38.1	2.34422e-10	0.46098	0.561	0.414	5.92361e-06	48h-prol-LEC	mrpl38
vamp5.1	1.31804e-08	0.460312	0.915	0.857	0.000333056	48h-prol-LEC	vamp5
prdx3.1	2.54286e-11	0.459592	0.845	0.717	6.42555e-07	48h-prol-LEC	prdx3
hnrnpul1l.1	9.4125e-15	0.457064	0.983	0.925	2.37845e-10	48h-prol-LEC	hnrnpul1l
tmem147.1	6.86122e-08	0.45692	0.781	0.691	0.00173376	48h-prol-LEC	tmem147
si:ch211-51e12.7.1	9.49256e-09	0.456139	0.963	0.919	0.000239868	48h-prol-LEC	si:ch211-51e12.7
ndufab1b.1	1.44633e-09	0.45576	0.703	0.528	3.65474e-05	48h-prol-LEC	ndufab1b
zgc:114119.1	1.07774e-10	0.454776	0.564	0.404	2.72335e-06	48h-prol-LEC	zgc:114119
mrps5.1	1.61361e-08	0.453744	0.554	0.402	0.000407743	48h-prol-LEC	mrps5
gcsha.1	1.8183e-09	0.452153	0.509	0.354	4.59465e-05	48h-prol-LEC	gcsha
npc2.1	1.61784e-07	0.451744	0.86	0.783	0.00408813	48h-prol-LEC	npc2
srrm1.1	3.63706e-11	0.451612	0.974	0.949	9.19049e-07	48h-prol-LEC	srrm1
ncdn.1	1.04331e-11	0.451131	0.525	0.363	2.63634e-07	48h-prol-LEC	ncdn
arid4a.2	2.23613e-10	0.450202	0.814	0.694	5.65047e-06	48h-prol-LEC	arid4a
fgfr4.1	5.95731e-14	0.450069	0.736	0.574	1.50535e-09	48h-prol-LEC	fgfr4
cdkn2aipnl.1	4.70829e-12	0.44981	0.562	0.392	1.18974e-07	48h-prol-LEC	cdkn2aipnl
syncrip.1	5.27699e-09	0.447421	0.828	0.718	0.000133344	48h-prol-LEC	syncrip
rbl1.2	3.49698e-08	0.44621	0.612	0.467	0.000883652	48h-prol-LEC	rbl1
hspa9.2	9.73244e-16	0.446158	0.89	0.783	2.45929e-11	48h-prol-LEC	hspa9
snrnp27.1	5.40365e-07	0.445817	0.688	0.561	0.0136545	48h-prol-LEC	snrnp27
cpsf1.1	4.52021e-12	0.445326	0.776	0.618	1.14221e-07	48h-prol-LEC	cpsf1
mta2.1	2.07485e-08	0.445187	0.738	0.61	0.000524294	48h-prol-LEC	mta2
eif4a2.1	1.12548e-06	0.444953	0.556	0.412	0.0284397	48h-prol-LEC	eif4a2
sidt2.1	2.16492e-05	0.443388	0.616	0.503	0.547054	48h-prol-LEC	sidt2
ifi30.1	2.29888e-07	0.442608	0.879	0.768	0.00580905	48h-prol-LEC	ifi30
si:zfos-1192g2.3.1	1.67075e-07	0.442216	0.523	0.388	0.00422183	48h-prol-LEC	si:zfos-1192g2.3
selenop.2	2.69951e-07	0.44217	0.992	0.99	0.00682139	48h-prol-LEC	selenop
ubap2b.1	4.08604e-12	0.441827	0.804	0.695	1.0325e-07	48h-prol-LEC	ubap2b
zmym2.1	1.06775e-08	0.440203	0.635	0.489	0.000269809	48h-prol-LEC	zmym2
hdgfl2.2	4.61654e-11	0.439698	0.753	0.61	1.16655e-06	48h-prol-LEC	hdgfl2
mak16.2	1.72389e-06	0.43925	0.54	0.416	0.0435611	48h-prol-LEC	mak16
dram2b.1	1.87784e-08	0.438502	0.716	0.603	0.00047451	48h-prol-LEC	dram2b
snrpa.1	6.59728e-09	0.437947	0.863	0.759	0.000166707	48h-prol-LEC	snrpa
mycla.1	5.98674e-12	0.437422	0.826	0.732	1.51279e-07	48h-prol-LEC	mycla
atp1a1a.1.2	3.78584e-11	0.437266	1	0.999	9.56645e-07	48h-prol-LEC	atp1a1a.1
cldn11b	1.74757e-06	0.43682	0.734	0.633	0.0441593	48h-prol-LEC	cldn11b
si:ch211-133n4.4.1	5.88267e-10	0.434965	0.725	0.585	1.48649e-05	48h-prol-LEC	si:ch211-133n4.4
man2a1.1	5.29087e-07	0.433457	0.747	0.612	0.0133695	48h-prol-LEC	man2a1
snx3.1	1.38943e-11	0.432983	0.825	0.714	3.51094e-07	48h-prol-LEC	snx3
cirbpa.1	2.2935e-14	0.432863	0.997	0.966	5.79544e-10	48h-prol-LEC	cirbpa
gusb.2	1.19387e-12	0.432319	0.978	0.949	3.01679e-08	48h-prol-LEC	gusb
pes.1	2.94302e-11	0.432014	0.652	0.513	7.43672e-07	48h-prol-LEC	pes
h2az2a.1	2.78583e-09	0.431952	0.936	0.837	7.03952e-05	48h-prol-LEC	h2az2a
bambib.1	2.10735e-11	0.431848	0.63	0.5	5.32505e-07	48h-prol-LEC	bambib
ptges3b.1	2.16568e-11	0.431785	0.891	0.768	5.47246e-07	48h-prol-LEC	ptges3b
smc1al.2	5.24222e-10	0.431028	0.939	0.867	1.32466e-05	48h-prol-LEC	smc1al
TADA1.1	1.4754e-11	0.430075	0.537	0.35	3.72819e-07	48h-prol-LEC	TADA1
zfr2	2.90336e-06	0.429429	0.627	0.504	0.0733651	48h-prol-LEC	zfr2
eif4h.2	6.93171e-08	0.429346	0.91	0.831	0.00175157	48h-prol-LEC	eif4h
ints14.1	1.32976e-06	0.428931	0.55	0.425	0.0336018	48h-prol-LEC	ints14
eif1axa.1	5.0449e-08	0.428384	0.764	0.619	0.0012748	48h-prol-LEC	eif1axa
mydgf.1	5.74917e-07	0.427156	0.849	0.799	0.0145276	48h-prol-LEC	mydgf
rmnd5b.1	2.20118e-06	0.4263	0.63	0.518	0.0556215	48h-prol-LEC	rmnd5b
ak2.1	1.53483e-10	0.423925	0.907	0.824	3.87835e-06	48h-prol-LEC	ak2
prpf18	1.29352e-05	0.422717	0.542	0.407	0.32686	48h-prol-LEC	prpf18
smarcd2.1	3.68586e-15	0.422658	0.545	0.363	9.31381e-11	48h-prol-LEC	smarcd2
wdr82.2	1.1024e-15	0.42232	0.879	0.727	2.78566e-11	48h-prol-LEC	wdr82
isy1.1	2.93343e-07	0.42165	0.606	0.493	0.00741248	48h-prol-LEC	isy1
meis1b.1	9.69043e-17	0.421578	0.72	0.541	2.44868e-12	48h-prol-LEC	meis1b
xrcc5.2	3.25514e-15	0.420822	0.79	0.664	8.2254e-11	48h-prol-LEC	xrcc5
prpf38b.2	5.38987e-07	0.420406	0.66	0.541	0.0136197	48h-prol-LEC	prpf38b
tmx1.2	1.77081e-09	0.419838	0.675	0.527	4.47465e-05	48h-prol-LEC	tmx1
srsf10b.1	1.08007e-15	0.418271	0.728	0.527	2.72923e-11	48h-prol-LEC	srsf10b
zgc:66427.1	6.48659e-09	0.418203	0.762	0.654	0.00016391	48h-prol-LEC	zgc:66427
svild.2	1.52943e-05	0.418185	0.829	0.722	0.386473	48h-prol-LEC	svild
nhp2.2	5.85018e-10	0.417511	0.773	0.625	1.47828e-05	48h-prol-LEC	nhp2
elf2b.2	4.1016e-10	0.41722	0.891	0.802	1.03643e-05	48h-prol-LEC	elf2b
idh3a.2	4.74645e-09	0.41714	0.809	0.708	0.000119938	48h-prol-LEC	idh3a
fubp1.1	6.14137e-07	0.415784	0.856	0.755	0.0155186	48h-prol-LEC	fubp1
tomm40l.1	1.15443e-11	0.415371	0.564	0.416	2.91714e-07	48h-prol-LEC	tomm40l
ptmaa.2	5.01401e-18	0.414945	0.991	0.973	1.26699e-13	48h-prol-LEC	ptmaa
ckap4.1	1.22e-10	0.414899	0.734	0.595	3.08281e-06	48h-prol-LEC	ckap4
dusp22b.1	8.28807e-16	0.41477	0.559	0.348	2.09431e-11	48h-prol-LEC	dusp22b
tp53bp1.2	1.30493e-12	0.414657	0.626	0.46	3.29743e-08	48h-prol-LEC	tp53bp1
eif4e1c.1	2.00154e-08	0.414371	0.829	0.725	0.00050577	48h-prol-LEC	eif4e1c
eed.1	4.3318e-08	0.413821	0.741	0.618	0.0010946	48h-prol-LEC	eed
snrpe.1	2.58539e-09	0.413386	0.651	0.479	6.53303e-05	48h-prol-LEC	snrpe
blmh.2	8.9621e-09	0.412487	0.834	0.728	0.000226463	48h-prol-LEC	blmh
baz1b.2	3.97684e-15	0.411887	0.894	0.759	1.00491e-10	48h-prol-LEC	baz1b
larp1b.1	5.66612e-09	0.411613	0.59	0.466	0.000143177	48h-prol-LEC	larp1b
sh3bgrl3.1	7.97121e-11	0.411605	0.969	0.941	2.01425e-06	48h-prol-LEC	sh3bgrl3
rrbp1a.1	2.58159e-07	0.411371	0.825	0.758	0.00652342	48h-prol-LEC	rrbp1a
fkbp9.1	1.82426e-11	0.410939	0.983	0.925	4.60972e-07	48h-prol-LEC	fkbp9
eftud2.1	9.90837e-11	0.410212	0.775	0.659	2.50375e-06	48h-prol-LEC	eftud2
uck2b.2	2.9234e-15	0.409756	0.849	0.698	7.38715e-11	48h-prol-LEC	uck2b
ndufa8.1	6.5038e-06	0.409457	0.717	0.593	0.164345	48h-prol-LEC	ndufa8
yy1b.1	1.09269e-07	0.409409	0.554	0.407	0.00276112	48h-prol-LEC	yy1b
eif2b1.2	2.57839e-12	0.408812	0.533	0.346	6.51534e-08	48h-prol-LEC	eif2b1
ss18.1	2.49751e-16	0.408751	0.837	0.698	6.31095e-12	48h-prol-LEC	ss18
zgc:114200.1	2.95963e-08	0.408564	0.551	0.414	0.000747868	48h-prol-LEC	zgc:114200
rbm12.1	1.32819e-08	0.408178	0.646	0.497	0.000335619	48h-prol-LEC	rbm12
eml2	4.31529e-09	0.407179	0.503	0.344	0.000109043	48h-prol-LEC	eml2
tfdp1a.2	4.80211e-15	0.40687	0.891	0.749	1.21345e-10	48h-prol-LEC	tfdp1a
med23.2	3.02056e-11	0.40656	0.697	0.541	7.63264e-07	48h-prol-LEC	med23
wdr61.1	5.35442e-10	0.406353	0.623	0.455	1.35301e-05	48h-prol-LEC	wdr61
prps1a.2	3.11119e-11	0.406146	0.755	0.659	7.86166e-07	48h-prol-LEC	prps1a
calr3b.1	1.44298e-07	0.406128	0.941	0.884	0.00364628	48h-prol-LEC	calr3b
cachd1.1	1.56775e-07	0.405801	0.55	0.415	0.00396154	48h-prol-LEC	cachd1
pip4k2ca.1	1.13564e-09	0.405759	0.868	0.779	2.86966e-05	48h-prol-LEC	pip4k2ca
rad21a.2	4.84819e-10	0.405574	1	1	1.22509e-05	48h-prol-LEC	rad21a
mtch2.1	6.24957e-09	0.405031	0.812	0.711	0.00015792	48h-prol-LEC	mtch2
aifm2.1	2.1639e-11	0.404784	0.756	0.613	5.46796e-07	48h-prol-LEC	aifm2
crnkl1.2	4.82187e-13	0.40366	0.84	0.735	1.21844e-08	48h-prol-LEC	crnkl1
hypk.1	1.41952e-08	0.403162	0.674	0.524	0.000358699	48h-prol-LEC	hypk
aph1b.1	2.20795e-10	0.403055	0.932	0.875	5.57926e-06	48h-prol-LEC	aph1b
snx5.2	3.38615e-10	0.402175	0.974	0.948	8.55646e-06	48h-prol-LEC	snx5
phf20b.1	5.23181e-09	0.401436	0.593	0.432	0.000132202	48h-prol-LEC	phf20b
hsp90b1.1	1.14216e-11	0.401322	0.967	0.966	2.88613e-07	48h-prol-LEC	hsp90b1
eif4a1a.1	1.33085e-10	0.401075	0.998	0.999	3.36292e-06	48h-prol-LEC	eif4a1a
sox6.1	2.34725e-05	0.400534	0.509	0.394	0.593127	48h-prol-LEC	sox6
sf3b4.2	2.28631e-16	0.400058	0.901	0.778	5.77727e-12	48h-prol-LEC	sf3b4
kpnb1.2	1.59125e-15	0.399502	0.97	0.945	4.02092e-11	48h-prol-LEC	kpnb1
nr2f2.2	2.00151e-08	0.399198	0.946	0.882	0.000505763	48h-prol-LEC	nr2f2
naxd.1	2.41474e-08	0.397908	0.722	0.61	0.000610181	48h-prol-LEC	naxd
noc3l.2	2.47426e-12	0.397888	0.502	0.336	6.2522e-08	48h-prol-LEC	noc3l
si:ch211-155e24.3	6.87259e-06	0.39771	0.545	0.425	0.173664	48h-prol-LEC	si:ch211-155e24.3
klf17.1	1.02193e-10	0.397587	0.582	0.442	2.58231e-06	48h-prol-LEC	klf17
rnmt.2	4.96428e-16	0.39722	0.615	0.426	1.25442e-11	48h-prol-LEC	rnmt
abcf2a.1	3.63106e-13	0.397047	0.983	0.953	9.17532e-09	48h-prol-LEC	abcf2a
thumpd1.1	5.00377e-13	0.39703	0.643	0.49	1.2644e-08	48h-prol-LEC	thumpd1
eif2s1b.1	3.59976e-14	0.396948	0.936	0.839	9.09624e-10	48h-prol-LEC	eif2s1b
srsf7a.1	1.51889e-13	0.396547	0.989	0.963	3.83808e-09	48h-prol-LEC	srsf7a
sub1a.1	6.86877e-09	0.394938	0.866	0.771	0.000173567	48h-prol-LEC	sub1a
ckba.1	2.46424e-06	0.394708	0.97	0.932	0.0622689	48h-prol-LEC	ckba
tfe3a.1	1.21602e-09	0.394492	0.671	0.507	3.07275e-05	48h-prol-LEC	tfe3a
si:ch211-173p18.3	2.14322e-05	0.394469	0.694	0.588	0.54157	48h-prol-LEC	si:ch211-173p18.3
ube2g2.1	1.93946e-08	0.394441	0.677	0.554	0.000490081	48h-prol-LEC	ube2g2
brd3b.1	2.43458e-08	0.394415	0.93	0.856	0.000615195	48h-prol-LEC	brd3b
marveld2a	2.3147e-06	0.393343	0.748	0.606	0.0584903	48h-prol-LEC	marveld2a
snrpd3l.1	2.13191e-12	0.392685	0.64	0.432	5.38713e-08	48h-prol-LEC	snrpd3l
sypl2b.1	7.80944e-15	0.392121	0.655	0.486	1.97337e-10	48h-prol-LEC	sypl2b
peak1.2	5.48964e-07	0.39204	0.953	0.909	0.0138718	48h-prol-LEC	peak1
mrpl51.1	1.32252e-11	0.391953	0.502	0.314	3.34187e-07	48h-prol-LEC	mrpl51
dyrk1ab.1	4.93669e-09	0.391719	0.719	0.588	0.000124745	48h-prol-LEC	dyrk1ab
kat6a.1	2.81951e-07	0.39166	0.542	0.408	0.00712463	48h-prol-LEC	kat6a
ylpm1.2	1.66152e-08	0.391005	0.898	0.805	0.000419848	48h-prol-LEC	ylpm1
ifrd2.1	6.79226e-10	0.390999	0.691	0.554	1.71634e-05	48h-prol-LEC	ifrd2
clk2b	1.10654e-07	0.390648	0.533	0.381	0.00279611	48h-prol-LEC	clk2b
chchd6b.1	2.89713e-08	0.390376	0.658	0.507	0.000732077	48h-prol-LEC	chchd6b
huwe1.1	2.87821e-06	0.390151	0.863	0.797	0.0727294	48h-prol-LEC	huwe1
gdpd4b.1	2.30083e-08	0.390081	0.921	0.843	0.000581397	48h-prol-LEC	gdpd4b
hyal2b.1	1.62137e-07	0.389984	0.713	0.555	0.00409705	48h-prol-LEC	hyal2b
dnajc2.1	2.27817e-12	0.389841	0.624	0.449	5.7567e-08	48h-prol-LEC	dnajc2
cnih1.1	2.41631e-07	0.389169	0.876	0.8	0.00610578	48h-prol-LEC	cnih1
ppwd1.1	8.45511e-13	0.389053	0.505	0.319	2.13652e-08	48h-prol-LEC	ppwd1
fkbp4.2	5.20313e-11	0.388504	0.811	0.707	1.31478e-06	48h-prol-LEC	fkbp4
itga8.1	1.26645e-07	0.388423	0.508	0.394	0.00320019	48h-prol-LEC	itga8
kmt2a.1	1.26912e-05	0.388372	0.547	0.422	0.320694	48h-prol-LEC	kmt2a
ubr5.1	1.75571e-07	0.388082	0.843	0.748	0.00443651	48h-prol-LEC	ubr5
zfp36l1a.2	8.90344e-09	0.387528	1	0.999	0.000224981	48h-prol-LEC	zfp36l1a
ugdh.1	5.58255e-14	0.387265	0.661	0.476	1.41066e-09	48h-prol-LEC	ugdh
trir.1	8.31651e-10	0.38673	0.679	0.503	2.1015e-05	48h-prol-LEC	trir
xpo1b.2	3.4267e-08	0.386227	0.818	0.725	0.000865893	48h-prol-LEC	xpo1b
rbm17	4.53594e-07	0.385466	0.551	0.416	0.0114619	48h-prol-LEC	rbm17
map7d1a.1	2.55988e-05	0.385206	0.578	0.453	0.646856	48h-prol-LEC	map7d1a
pdia6.1	1.06127e-07	0.384832	0.974	0.943	0.00268172	48h-prol-LEC	pdia6
tmem11.1	3.73691e-09	0.384511	0.703	0.579	9.4428e-05	48h-prol-LEC	tmem11
eif4a3.1	1.09998e-09	0.384393	0.975	0.942	2.77953e-05	48h-prol-LEC	eif4a3
calm3a.2	5.31856e-10	0.382879	0.998	0.997	1.34395e-05	48h-prol-LEC	calm3a
vma21.1	1.05173e-09	0.381517	0.696	0.565	2.65761e-05	48h-prol-LEC	vma21
si:ch211-114c12.2.1	9.90681e-08	0.381383	0.901	0.84	0.00250335	48h-prol-LEC	si:ch211-114c12.2
atp1b3a.1	3.52531e-09	0.381307	0.526	0.375	8.90811e-05	48h-prol-LEC	atp1b3a
tmem106a.1	1.56516e-12	0.380093	0.556	0.365	3.955e-08	48h-prol-LEC	tmem106a
txnrd3.2	6.35385e-15	0.379545	0.975	0.95	1.60555e-10	48h-prol-LEC	txnrd3
pfdn5.1	2.283e-06	0.379072	0.689	0.564	0.0576892	48h-prol-LEC	pfdn5
sod1.1	2.9091e-09	0.378259	0.627	0.462	7.35101e-05	48h-prol-LEC	sod1
inka1b.1	4.61361e-09	0.377048	0.88	0.78	0.000116581	48h-prol-LEC	inka1b
nup188.2	6.03002e-14	0.376134	0.683	0.497	1.52372e-09	48h-prol-LEC	nup188
si:ch73-375g18.1.2	2.33517e-06	0.375906	0.536	0.404	0.0590073	48h-prol-LEC	si:ch73-375g18.1
ppdpfb.2	6.31459e-07	0.37563	0.977	0.976	0.0159563	48h-prol-LEC	ppdpfb
plvapb.1	1.60249e-05	0.375427	1	1	0.404933	48h-prol-LEC	plvapb
eno3.1	4.07997e-10	0.375034	0.952	0.899	1.03097e-05	48h-prol-LEC	eno3
eif4e2rs1.1	1.51365e-10	0.375022	0.801	0.701	3.82484e-06	48h-prol-LEC	eif4e2rs1
h1-10.1	4.34171e-11	0.374813	0.835	0.749	1.09711e-06	48h-prol-LEC	h1-10
oser1	2.23039e-09	0.374006	0.648	0.489	5.63598e-05	48h-prol-LEC	oser1
gpd1l.1	1.36151e-06	0.373628	0.519	0.399	0.034404	48h-prol-LEC	gpd1l
arl6ip1.1	3.84404e-07	0.37362	0.967	0.922	0.0097135	48h-prol-LEC	arl6ip1
si:dkeyp-113d7.1.1	2.51551e-13	0.37346	0.865	0.772	6.35644e-09	48h-prol-LEC	si:dkeyp-113d7.1
serpinb1l3	3.43843e-10	0.373143	0.68	0.523	8.68858e-06	48h-prol-LEC	serpinb1l3
fgfr1op.1	4.10846e-07	0.372783	0.581	0.432	0.0103817	48h-prol-LEC	fgfr1op
idh3b	1.724e-05	0.372404	0.604	0.535	0.435638	48h-prol-LEC	idh3b
snx7.1	9.94221e-09	0.37198	0.657	0.51	0.00025123	48h-prol-LEC	snx7
tomm22.1	3.38449e-09	0.371877	0.778	0.637	8.55228e-05	48h-prol-LEC	tomm22
ssr4.1	1.34361e-06	0.371669	0.957	0.899	0.0339516	48h-prol-LEC	ssr4
acat1.1	1.92815e-07	0.371565	0.598	0.463	0.00487224	48h-prol-LEC	acat1
rrp12.2	2.3817e-10	0.37081	0.646	0.513	6.01831e-06	48h-prol-LEC	rrp12
msl1b	2.14674e-05	0.37024	0.651	0.531	0.542459	48h-prol-LEC	msl1b
bcl7a.1	6.9778e-08	0.370148	0.7	0.537	0.00176322	48h-prol-LEC	bcl7a
uap1l1.2	3.87887e-06	0.3688	0.686	0.586	0.0980151	48h-prol-LEC	uap1l1
mzt2b.1	1.30228e-05	0.368757	0.649	0.531	0.329074	48h-prol-LEC	mzt2b
snrpd2.1	1.88485e-08	0.368737	0.748	0.639	0.000476283	48h-prol-LEC	snrpd2
polr2gl.1	3.71221e-10	0.368615	0.592	0.402	9.38038e-06	48h-prol-LEC	polr2gl
TXN.1	1.97612e-12	0.368108	0.994	0.982	4.99346e-08	48h-prol-LEC	TXN
itgb1a.1	1.65113e-11	0.367977	0.55	0.358	4.17224e-07	48h-prol-LEC	itgb1a
timm13.1	2.23279e-11	0.3669	0.502	0.331	5.64205e-07	48h-prol-LEC	timm13
hnrnpk.1	2.22773e-09	0.366762	0.98	0.924	5.62926e-05	48h-prol-LEC	hnrnpk
psma8.1	4.70569e-11	0.366695	0.991	0.972	1.18908e-06	48h-prol-LEC	psma8
rac2.1	9.66259e-10	0.36636	0.651	0.525	2.44164e-05	48h-prol-LEC	rac2
pdcd5.1	3.1169e-07	0.364778	0.596	0.456	0.00787608	48h-prol-LEC	pdcd5
tma7.1	1.0274e-11	0.364695	0.804	0.639	2.59613e-07	48h-prol-LEC	tma7
mrpl3.1	3.37956e-13	0.363336	0.674	0.493	8.53981e-09	48h-prol-LEC	mrpl3
aifm1.1	2.61096e-10	0.363201	0.534	0.384	6.59765e-06	48h-prol-LEC	aifm1
lima1a.2	2.74199e-07	0.362534	0.964	0.928	0.00692875	48h-prol-LEC	lima1a
inpp5l.1	1.30989e-11	0.362179	0.509	0.331	3.30995e-07	48h-prol-LEC	inpp5l
mcts1.1	1.64315e-09	0.36132	0.618	0.467	4.15206e-05	48h-prol-LEC	mcts1
fthl27.2	3.58105e-07	0.360851	0.998	0.992	0.00904896	48h-prol-LEC	fthl27
tram2.1	4.29363e-10	0.36059	0.899	0.779	1.08496e-05	48h-prol-LEC	tram2
psmd12.1	8.42454e-09	0.360229	0.961	0.926	0.00021288	48h-prol-LEC	psmd12
lpcat3.1	1.55164e-07	0.360031	0.582	0.455	0.00392084	48h-prol-LEC	lpcat3
rpn1.1	3.03126e-08	0.359584	1	0.994	0.000765969	48h-prol-LEC	rpn1
cpsf3.2	4.58875e-08	0.35947	0.82	0.718	0.00115953	48h-prol-LEC	cpsf3
lsm6.1	7.43886e-09	0.358932	0.571	0.409	0.000187973	48h-prol-LEC	lsm6
ccz1.1	6.75174e-11	0.358561	0.742	0.574	1.7061e-06	48h-prol-LEC	ccz1
pnn.1	2.92802e-10	0.358423	0.806	0.684	7.39881e-06	48h-prol-LEC	pnn
rbm14a.1	1.82317e-10	0.357419	0.908	0.813	4.60697e-06	48h-prol-LEC	rbm14a
usp44.1	1.0025e-11	0.35729	0.668	0.511	2.53323e-07	48h-prol-LEC	usp44
ptp4a3b.1	1.07935e-10	0.357165	0.651	0.456	2.7274e-06	48h-prol-LEC	ptp4a3b
enoph1.1	9.04862e-08	0.356292	0.638	0.487	0.0022865	48h-prol-LEC	enoph1
gtf2e2.1	1.13941e-08	0.356091	0.68	0.524	0.000287919	48h-prol-LEC	gtf2e2
eif3g.1	2.8886e-07	0.355251	0.975	0.925	0.0072992	48h-prol-LEC	eif3g
rbm7.1	1.12515e-07	0.355094	0.559	0.397	0.00284313	48h-prol-LEC	rbm7
cyp1a.1	1.88587e-13	0.35454	1	1	4.76541e-09	48h-prol-LEC	cyp1a
mrps9.1	1.00719e-10	0.353322	0.575	0.415	2.54508e-06	48h-prol-LEC	mrps9
cotl1.2	6.89551e-09	0.353091	0.997	0.982	0.000174243	48h-prol-LEC	cotl1
rreb1b.1	5.5232e-06	0.352811	0.548	0.425	0.139566	48h-prol-LEC	rreb1b
brwd1	3.63897e-06	0.352054	0.557	0.418	0.0919533	48h-prol-LEC	brwd1
rell1	3.18058e-08	0.351954	0.753	0.629	0.0008037	48h-prol-LEC	rell1
tp53.1	9.16214e-10	0.35194	0.943	0.888	2.31518e-05	48h-prol-LEC	tp53
prdx4.1	1.07123e-09	0.351769	0.952	0.875	2.70689e-05	48h-prol-LEC	prdx4
nr2f6a.1	8.84246e-08	0.351408	0.812	0.729	0.0022344	48h-prol-LEC	nr2f6a
tgfbi.1	4.38225e-10	0.35135	0.977	0.98	1.10735e-05	48h-prol-LEC	tgfbi
p3h3.1	3.72864e-10	0.349672	0.658	0.55	9.4219e-06	48h-prol-LEC	p3h3
pycard.1	1.2296e-09	0.3493	0.708	0.559	3.10709e-05	48h-prol-LEC	pycard
denr.1	6.45046e-10	0.347903	0.854	0.738	1.62997e-05	48h-prol-LEC	denr
esd.2	7.94967e-08	0.347041	0.817	0.712	0.0020088	48h-prol-LEC	esd
noc2l.2	3.40498e-11	0.347019	0.548	0.397	8.60405e-07	48h-prol-LEC	noc2l
sarnp.1	7.82584e-08	0.346974	0.623	0.47	0.00197751	48h-prol-LEC	sarnp
polr2l.1	3.86345e-05	0.346452	0.551	0.429	0.976255	48h-prol-LEC	polr2l
ube2ib.1	1.32205e-13	0.345702	0.944	0.839	3.34068e-09	48h-prol-LEC	ube2ib
nkx2.3.2	1.44166e-10	0.344849	0.561	0.39	3.64292e-06	48h-prol-LEC	nkx2.3
dcp1b	4.78858e-06	0.344402	0.565	0.431	0.121003	48h-prol-LEC	dcp1b
taf9.1	1.26031e-05	0.344122	0.616	0.487	0.318468	48h-prol-LEC	taf9
nucks1a.1	5.74317e-11	0.343861	0.972	0.945	1.45124e-06	48h-prol-LEC	nucks1a
sms.2	1.33537e-12	0.343354	0.505	0.323	3.37433e-08	48h-prol-LEC	sms
sult6b1.1	1.20436e-11	0.343201	0.901	0.806	3.04331e-07	48h-prol-LEC	sult6b1
tufm.1	1.03481e-13	0.343199	0.821	0.68	2.61487e-09	48h-prol-LEC	tufm
u2surp.1	5.35592e-08	0.342408	0.691	0.55	0.00135339	48h-prol-LEC	u2surp
spns2	5.52066e-06	0.342377	0.998	0.99	0.139502	48h-prol-LEC	spns2
pafah1b1a.2	3.31227e-09	0.34128	0.904	0.817	8.36977e-05	48h-prol-LEC	pafah1b1a
glrx5.1	1.04053e-11	0.341009	0.744	0.592	2.62931e-07	48h-prol-LEC	glrx5
znf1035.1	8.10376e-08	0.340493	0.784	0.663	0.00204774	48h-prol-LEC	znf1035
actl6a.2	1.76743e-11	0.339888	0.848	0.715	4.46612e-07	48h-prol-LEC	actl6a
adh5.1	7.37848e-09	0.339743	0.929	0.891	0.000186447	48h-prol-LEC	adh5
ints9	1.17593e-07	0.339638	0.505	0.367	0.00297145	48h-prol-LEC	ints9
aplnrb.2	4.40844e-06	0.339327	1	1	0.111397	48h-prol-LEC	aplnrb
snrpg.1	2.76033e-08	0.33898	0.696	0.548	0.000697507	48h-prol-LEC	snrpg
myef2.1	1.51977e-08	0.338844	0.919	0.885	0.000384031	48h-prol-LEC	myef2
hspa4b.1	8.56079e-12	0.337357	0.95	0.915	2.16323e-07	48h-prol-LEC	hspa4b
ddost.1	1.16685e-09	0.336578	0.991	0.986	2.94851e-05	48h-prol-LEC	ddost
trappc3.1	1.05001e-07	0.336572	0.57	0.421	0.00265328	48h-prol-LEC	trappc3
eif2b4.1	5.89458e-12	0.336537	0.71	0.54	1.4895e-07	48h-prol-LEC	eif2b4
jpt1b.2	1.14994e-05	0.336387	0.977	0.958	0.290577	48h-prol-LEC	jpt1b
si:ch211-195d17.2.1	3.27644e-08	0.335891	0.587	0.453	0.000827924	48h-prol-LEC	si:ch211-195d17.2
pigs.2	1.23775e-10	0.335328	0.842	0.678	3.12767e-06	48h-prol-LEC	pigs
ube2nb.2	3.3487e-10	0.334651	0.851	0.725	8.46184e-06	48h-prol-LEC	ube2nb
si:ch211-198a12.6.1	2.72329e-06	0.334456	0.994	0.98	0.0688149	48h-prol-LEC	si:ch211-198a12.6
vaspb.1	1.15616e-07	0.333571	0.663	0.535	0.00292151	48h-prol-LEC	vaspb
ppp1caa.1	4.90805e-08	0.333451	0.97	0.933	0.00124022	48h-prol-LEC	ppp1caa
ndufaf1.1	1.855e-09	0.332612	0.551	0.381	4.68739e-05	48h-prol-LEC	ndufaf1
cops2.1	7.89694e-11	0.332292	0.825	0.695	1.99548e-06	48h-prol-LEC	cops2
babam2.1	7.00531e-06	0.331835	0.621	0.476	0.177017	48h-prol-LEC	babam2
tspan11	7.64814e-06	0.331576	0.502	0.377	0.193261	48h-prol-LEC	tspan11
gtf2f2a	8.05502e-09	0.331194	0.582	0.425	0.000203542	48h-prol-LEC	gtf2f2a
UBB.1	3.10844e-08	0.331031	0.96	0.912	0.000785472	48h-prol-LEC	UBB
mff.1	1.01212e-07	0.329889	0.582	0.433	0.00255751	48h-prol-LEC	mff
cops7a.1	9.25932e-12	0.329626	0.77	0.595	2.33974e-07	48h-prol-LEC	cops7a
eif4bb.2	8.33102e-12	0.329582	0.975	0.945	2.10517e-07	48h-prol-LEC	eif4bb
idh3g.1	1.75702e-06	0.329342	0.624	0.506	0.0443982	48h-prol-LEC	idh3g
khsrp.2	2.4688e-13	0.329023	0.964	0.881	6.23842e-09	48h-prol-LEC	khsrp
bri3	3.54885e-06	0.328412	0.509	0.378	0.0896758	48h-prol-LEC	bri3
eya3.1	1.02312e-06	0.328096	0.505	0.38	0.0258532	48h-prol-LEC	eya3
srsf3b.1	1.89699e-08	0.327885	0.994	0.962	0.000479351	48h-prol-LEC	srsf3b
asdurf.1	6.87094e-11	0.327829	0.512	0.353	1.73622e-06	48h-prol-LEC	asdurf
dync1i2a.1	3.12847e-09	0.327766	0.936	0.86	7.90533e-05	48h-prol-LEC	dync1i2a
sept9a.1	1.48201e-07	0.325728	0.963	0.929	0.00374488	48h-prol-LEC	sept9a
atp5f1c.1	5.46283e-08	0.325666	0.991	0.956	0.0013804	48h-prol-LEC	atp5f1c
wdr43.2	5.21544e-16	0.325624	0.866	0.752	1.31789e-11	48h-prol-LEC	wdr43
mfap3l.1	3.75134e-06	0.325351	0.634	0.523	0.0947927	48h-prol-LEC	mfap3l
papolg.2	8.28868e-12	0.324877	0.804	0.67	2.09447e-07	48h-prol-LEC	papolg
pias4a.1	2.36389e-08	0.324773	0.644	0.531	0.00059733	48h-prol-LEC	pias4a
cnot9.1	1.25546e-10	0.324607	0.859	0.78	3.17241e-06	48h-prol-LEC	cnot9
pmpcb.1	1.28828e-07	0.324552	0.545	0.402	0.00325535	48h-prol-LEC	pmpcb
nos1apa	2.11214e-06	0.324452	0.503	0.373	0.0533716	48h-prol-LEC	nos1apa
COLGALT1	3.76041e-08	0.324141	0.741	0.62	0.000950218	48h-prol-LEC	COLGALT1
washc2c	6.05693e-06	0.323317	0.7	0.574	0.153053	48h-prol-LEC	washc2c
ywhaqa.1	2.42508e-08	0.323237	0.963	0.916	0.000612794	48h-prol-LEC	ywhaqa
mgat1b.2	9.02443e-08	0.322993	0.939	0.877	0.00228038	48h-prol-LEC	mgat1b
nfyc.1	1.96094e-09	0.322762	0.784	0.654	4.9551e-05	48h-prol-LEC	nfyc
il6st.1	6.41154e-06	0.322659	0.599	0.459	0.162013	48h-prol-LEC	il6st
polr2f.1	1.31667e-07	0.322327	0.509	0.353	0.0033271	48h-prol-LEC	polr2f
si:ch211-259g3.4	1.16689e-05	0.321848	0.525	0.394	0.294862	48h-prol-LEC	si:ch211-259g3.4
ncoa5.1	1.56308e-08	0.321725	0.882	0.783	0.000394974	48h-prol-LEC	ncoa5
asap1b.2	1.47384e-08	0.321696	0.907	0.822	0.000372425	48h-prol-LEC	asap1b
celf1.1	1.34092e-11	0.321358	0.843	0.687	3.38838e-07	48h-prol-LEC	celf1
nup50.2	8.48635e-11	0.321108	0.916	0.86	2.14442e-06	48h-prol-LEC	nup50
eif3ba.1	2.05955e-09	0.32057	1	0.997	5.20428e-05	48h-prol-LEC	eif3ba
pygo2.1	1.23506e-07	0.320328	0.835	0.703	0.00312088	48h-prol-LEC	pygo2
cdc40	4.45664e-10	0.319451	0.725	0.637	1.12615e-05	48h-prol-LEC	cdc40
tspan18b.2	8.39908e-08	0.319267	0.998	0.994	0.00212236	48h-prol-LEC	tspan18b
calua	1.39141e-05	0.318736	0.992	0.982	0.351596	48h-prol-LEC	calua
psmc3.1	4.82391e-08	0.318466	0.986	0.967	0.00121895	48h-prol-LEC	psmc3
adi1.1	3.08926e-08	0.317496	0.547	0.391	0.000780625	48h-prol-LEC	adi1
psmb10.1	2.54305e-13	0.316808	0.523	0.343	6.42602e-09	48h-prol-LEC	psmb10
washc5	2.56274e-06	0.316479	0.554	0.421	0.0647578	48h-prol-LEC	washc5
nck1a.1	9.76856e-12	0.3163	0.733	0.582	2.46842e-07	48h-prol-LEC	nck1a
mrps18b.2	1.33883e-16	0.315544	0.519	0.305	3.38308e-12	48h-prol-LEC	mrps18b
hnrnpaba.1	7.37018e-09	0.315474	1	0.997	0.000186237	48h-prol-LEC	hnrnpaba
DAB2.1	7.21386e-07	0.315382	0.697	0.541	0.0182287	48h-prol-LEC	DAB2
galnt7.2	3.05436e-11	0.314834	0.694	0.5	7.71806e-07	48h-prol-LEC	galnt7
zcchc24.1	1.73527e-05	0.313953	0.84	0.744	0.438485	48h-prol-LEC	zcchc24
znf143a	1.43298e-07	0.313925	0.655	0.541	0.00362099	48h-prol-LEC	znf143a
CABZ01029422.1.2	1.93069e-06	0.313872	0.641	0.516	0.0487866	48h-prol-LEC	CABZ01029422.1
znf330.1	1.44678e-07	0.31378	0.734	0.615	0.00365586	48h-prol-LEC	znf330
eif2s2.1	8.14602e-07	0.313754	0.981	0.956	0.0205842	48h-prol-LEC	eif2s2
cstf1.1	2.03242e-08	0.313655	0.764	0.686	0.000513573	48h-prol-LEC	cstf1
atp5f1b.1	1.55148e-08	0.313008	1	1	0.000392043	48h-prol-LEC	atp5f1b
ddx56.2	7.36724e-09	0.312982	0.592	0.46	0.000186163	48h-prol-LEC	ddx56
xpo1a.1	2.17795e-14	0.31275	0.862	0.748	5.50347e-10	48h-prol-LEC	xpo1a
pno1	1.6459e-11	0.312117	0.668	0.48	4.15902e-07	48h-prol-LEC	pno1
naa35.1	8.42047e-07	0.311797	0.738	0.626	0.0212777	48h-prol-LEC	naa35
polr2a.1	1.93985e-10	0.311397	0.863	0.749	4.9018e-06	48h-prol-LEC	polr2a
rbm8a.1	1.98883e-06	0.31134	0.952	0.915	0.0502558	48h-prol-LEC	rbm8a
tlk2.1	2.65305e-05	0.311248	0.613	0.483	0.670399	48h-prol-LEC	tlk2
serinc2	7.81384e-06	0.31117	0.946	0.925	0.197448	48h-prol-LEC	serinc2
trim71.1	6.22836e-07	0.31075	0.797	0.717	0.0157385	48h-prol-LEC	trim71
cd81a.2	7.11723e-09	0.310589	1	1	0.000179845	48h-prol-LEC	cd81a
rcc2.1	5.92592e-09	0.309891	0.905	0.837	0.000149742	48h-prol-LEC	rcc2
khdrbs1a.1	3.91583e-10	0.307296	1	1	9.8949e-06	48h-prol-LEC	khdrbs1a
jpt2.1	2.26328e-07	0.307084	0.992	0.973	0.00571909	48h-prol-LEC	jpt2
atoh8.2	3.64306e-08	0.306662	0.941	0.907	0.000920564	48h-prol-LEC	atoh8
st13.1	4.51934e-08	0.306552	0.714	0.633	0.00114199	48h-prol-LEC	st13
lsm4.1	9.59403e-08	0.30496	0.714	0.584	0.00242431	48h-prol-LEC	lsm4
drg2.2	2.5313e-10	0.30473	0.761	0.619	6.39634e-06	48h-prol-LEC	drg2
snap23.1.2	2.27239e-09	0.304642	0.97	0.928	5.74209e-05	48h-prol-LEC	snap23.1
suz12a	4.88109e-10	0.304482	0.694	0.582	1.2334e-05	48h-prol-LEC	suz12a
manf.1	1.45228e-13	0.30408	0.707	0.521	3.66977e-09	48h-prol-LEC	manf
phc2a	5.21268e-15	0.303819	0.615	0.416	1.31719e-10	48h-prol-LEC	phc2a
wdr12.2	9.49426e-09	0.303683	0.514	0.388	0.000239911	48h-prol-LEC	wdr12
smu1a.1	8.8627e-09	0.303666	0.849	0.744	0.000223951	48h-prol-LEC	smu1a
lman1.1	1.09948e-06	0.303621	0.557	0.418	0.0277827	48h-prol-LEC	lman1
osbpl9.1	2.7667e-07	0.303223	0.565	0.422	0.00699116	48h-prol-LEC	osbpl9
pitrm1.1	7.19185e-10	0.303079	0.578	0.438	1.81731e-05	48h-prol-LEC	pitrm1
atp13a1.1	8.62689e-09	0.30278	0.797	0.694	0.000217993	48h-prol-LEC	atp13a1
rbm26.1	1.06823e-08	0.302074	0.879	0.771	0.000269931	48h-prol-LEC	rbm26
khdrbs1b.1	1.53052e-12	0.302012	0.95	0.854	3.86746e-08	48h-prol-LEC	khdrbs1b
tmem263	1.15575e-12	0.300863	0.73	0.602	2.92046e-08	48h-prol-LEC	tmem263
taf10.1	5.92745e-07	0.300514	0.731	0.62	0.0149781	48h-prol-LEC	taf10
nedd8.1	9.53663e-06	0.300274	0.643	0.503	0.240981	48h-prol-LEC	nedd8
anp32e.2	4.3011e-11	0.299768	0.981	0.958	1.08684e-06	48h-prol-LEC	anp32e
lsm14ab.1	5.80798e-09	0.299279	0.852	0.795	0.000146762	48h-prol-LEC	lsm14ab
hnrnph1l.1	3.99113e-07	0.298746	0.938	0.897	0.0100852	48h-prol-LEC	hnrnph1l
baxa	1.6128e-06	0.298383	0.64	0.52	0.0407537	48h-prol-LEC	baxa
pla2g15.1	1.71529e-08	0.297589	0.778	0.652	0.000433437	48h-prol-LEC	pla2g15
cltca.2	1.10667e-06	0.297208	0.997	0.987	0.0279643	48h-prol-LEC	cltca
zgc:55733	2.25028e-05	0.297109	0.733	0.635	0.568624	48h-prol-LEC	zgc:55733
dhx15.2	6.52943e-08	0.294739	0.977	0.956	0.00164992	48h-prol-LEC	dhx15
nmt1a.1	3.43894e-10	0.29389	0.893	0.822	8.68985e-06	48h-prol-LEC	nmt1a
calr3a.1	4.27509e-08	0.293602	0.949	0.902	0.00108027	48h-prol-LEC	calr3a
cnp.2	2.36181e-12	0.293266	0.936	0.846	5.96805e-08	48h-prol-LEC	cnp
wdr83os	1.08568e-06	0.293194	0.798	0.647	0.0274339	48h-prol-LEC	wdr83os
vkorc1l1.1	7.88609e-09	0.293141	0.73	0.562	0.000199273	48h-prol-LEC	vkorc1l1
ewsr1b.1	5.24761e-10	0.29197	0.981	0.918	1.32602e-05	48h-prol-LEC	ewsr1b
hoxb3a.1	5.63802e-08	0.291961	0.545	0.392	0.00142467	48h-prol-LEC	hoxb3a
polr2eb.2	9.61692e-08	0.291337	0.66	0.5	0.0024301	48h-prol-LEC	polr2eb
rpl18a.2	2.33872e-05	0.291187	1	1	0.590972	48h-prol-LEC	rpl18a
tgif1.1	2.55363e-09	0.291171	0.953	0.888	6.45278e-05	48h-prol-LEC	tgif1
puf60b.2	2.25262e-08	0.291086	0.936	0.874	0.000569215	48h-prol-LEC	puf60b
rpn2.1	3.07021e-08	0.289535	1	0.993	0.000775811	48h-prol-LEC	rpn2
sumo3a.1	2.82249e-08	0.289177	0.988	0.963	0.000713216	48h-prol-LEC	sumo3a
pcdh17.1	3.10886e-07	0.288779	0.891	0.813	0.00785577	48h-prol-LEC	pcdh17
acadvl.1	1.64367e-11	0.288571	0.904	0.851	4.15339e-07	48h-prol-LEC	acadvl
cwc22.1	4.96174e-07	0.287957	0.711	0.633	0.0125378	48h-prol-LEC	cwc22
naa10.1	2.67493e-09	0.287691	0.752	0.639	6.75928e-05	48h-prol-LEC	naa10
safb.1	7.81999e-08	0.287445	0.823	0.693	0.00197603	48h-prol-LEC	safb
pcca.2	4.11435e-08	0.287266	0.654	0.527	0.00103965	48h-prol-LEC	pcca
sptlc2a.2	9.75326e-08	0.287105	0.96	0.912	0.00246455	48h-prol-LEC	sptlc2a
dnajc8	2.25712e-05	0.286735	0.86	0.805	0.570351	48h-prol-LEC	dnajc8
ide.1	3.79165e-08	0.286542	0.758	0.659	0.000958111	48h-prol-LEC	ide
tnpo2.2	1.62008e-12	0.286397	0.797	0.657	4.09378e-08	48h-prol-LEC	tnpo2
fbn2b.1	4.37056e-15	0.286396	0.885	0.751	1.1044e-10	48h-prol-LEC	fbn2b
thap11.1	4.13938e-07	0.286303	0.519	0.38	0.0104598	48h-prol-LEC	thap11
rtcb.1	1.47621e-12	0.286291	0.626	0.463	3.73024e-08	48h-prol-LEC	rtcb
ndufa6.1	9.16575e-06	0.286282	0.714	0.575	0.231609	48h-prol-LEC	ndufa6
sgta.1	2.49017e-08	0.285152	0.846	0.741	0.00062924	48h-prol-LEC	sgta
cnep1r1	3.07234e-09	0.284945	0.526	0.343	7.76351e-05	48h-prol-LEC	cnep1r1
pbrm1l.1	1.15135e-06	0.284089	0.755	0.656	0.0290935	48h-prol-LEC	pbrm1l
mrtfab	1.62911e-06	0.283796	0.644	0.5	0.0411659	48h-prol-LEC	mrtfab
apex1.1	9.20949e-06	0.283553	0.876	0.788	0.232715	48h-prol-LEC	apex1
rbm6.1	8.95247e-06	0.283476	0.691	0.574	0.22622	48h-prol-LEC	rbm6
gpatch1.1	1.81387e-06	0.282989	0.602	0.472	0.0458346	48h-prol-LEC	gpatch1
tmem88a.2	2.40691e-08	0.282399	0.998	0.997	0.000608201	48h-prol-LEC	tmem88a
ndufv1.1	2.28534e-12	0.281936	0.908	0.839	5.77483e-08	48h-prol-LEC	ndufv1
poldip3.1	3.45992e-14	0.281768	0.72	0.527	8.74288e-10	48h-prol-LEC	poldip3
chpt1	3.56909e-07	0.281447	0.728	0.625	0.00901873	48h-prol-LEC	chpt1
rad54l2	4.95168e-10	0.280993	0.609	0.431	1.25124e-05	48h-prol-LEC	rad54l2
tmem33	5.151e-10	0.280407	0.927	0.844	1.30161e-05	48h-prol-LEC	tmem33
rbmx.2	6.1612e-08	0.280273	0.919	0.858	0.00155687	48h-prol-LEC	rbmx
cndp2.2	5.77316e-10	0.279946	0.852	0.748	1.45882e-05	48h-prol-LEC	cndp2
thumpd3.2	8.10501e-15	0.279893	0.509	0.319	2.04806e-10	48h-prol-LEC	thumpd3
rer1	5.93023e-08	0.279586	0.919	0.885	0.00149851	48h-prol-LEC	rer1
hnrnpua	3.77548e-05	0.278919	0.57	0.448	0.954027	48h-prol-LEC	hnrnpua
cpsf6.1	3.74346e-09	0.278815	0.863	0.735	9.45935e-05	48h-prol-LEC	cpsf6
yipf5	1.84792e-10	0.278779	0.714	0.54	4.6695e-06	48h-prol-LEC	yipf5
si:ch211-15b10.6.1	1.14673e-07	0.278587	0.629	0.492	0.00289768	48h-prol-LEC	si:ch211-15b10.6
prpf39.1	3.14208e-10	0.278347	0.974	0.938	7.93972e-06	48h-prol-LEC	prpf39
cpox.1	3.96058e-12	0.278283	0.595	0.45	1.0008e-07	48h-prol-LEC	cpox
pdia5.1	3.07794e-14	0.27797	0.812	0.669	7.77764e-10	48h-prol-LEC	pdia5
amdhd2	1.52565e-07	0.277918	0.722	0.596	0.00385516	48h-prol-LEC	amdhd2
znf395a.1	1.59939e-08	0.277153	0.713	0.598	0.000404151	48h-prol-LEC	znf395a
agpat4	1.88454e-07	0.276395	0.747	0.64	0.00476204	48h-prol-LEC	agpat4
hexim1.1	1.50749e-11	0.276181	0.852	0.739	3.80927e-07	48h-prol-LEC	hexim1
tnfaip2b.1	4.11992e-08	0.275743	0.966	0.932	0.00104106	48h-prol-LEC	tnfaip2b
rbm39a.1	5.23317e-14	0.275681	0.955	0.89	1.32237e-09	48h-prol-LEC	rbm39a
bud31.1	2.62277e-07	0.275562	0.736	0.602	0.00662748	48h-prol-LEC	bud31
marcksl1b.2	5.58513e-06	0.275475	1	1	0.141131	48h-prol-LEC	marcksl1b
dcun1d5.1	2.70876e-09	0.275441	0.688	0.518	6.84477e-05	48h-prol-LEC	dcun1d5
pfn2.2	3.09821e-07	0.275195	1	1	0.00782887	48h-prol-LEC	pfn2
patl1.1	3.14794e-09	0.275131	0.866	0.775	7.95452e-05	48h-prol-LEC	patl1
ndufaf3.1	1.4712e-10	0.27435	0.519	0.334	3.71756e-06	48h-prol-LEC	ndufaf3
ddx42.1	4.99309e-08	0.27396	0.629	0.479	0.0012617	48h-prol-LEC	ddx42
casc3	2.72466e-08	0.273683	0.643	0.483	0.000688495	48h-prol-LEC	casc3
higd1a.1	3.0635e-09	0.273433	0.669	0.534	7.74116e-05	48h-prol-LEC	higd1a
psmd7.1	8.5347e-08	0.273352	0.882	0.793	0.00215663	48h-prol-LEC	psmd7
hells.2	6.248e-16	0.272916	0.801	0.659	1.57881e-11	48h-prol-LEC	hells
tm9sf4.2	2.81842e-11	0.272316	0.939	0.833	7.12185e-07	48h-prol-LEC	tm9sf4
ddt	2.6347e-07	0.271889	0.615	0.476	0.00665762	48h-prol-LEC	ddt
dda1.1	1.72135e-05	0.271773	0.57	0.453	0.434968	48h-prol-LEC	dda1
ccnl1b.1	1.17355e-08	0.271335	0.904	0.814	0.000296543	48h-prol-LEC	ccnl1b
srsf6b.1	2.70627e-08	0.27133	0.88	0.813	0.000683847	48h-prol-LEC	srsf6b
vps26c.1	2.90459e-08	0.270936	0.742	0.629	0.000733961	48h-prol-LEC	vps26c
cant1a.1	1.56043e-07	0.270369	0.747	0.64	0.00394305	48h-prol-LEC	cant1a
lap3.1	5.97776e-10	0.270183	0.599	0.442	1.51052e-05	48h-prol-LEC	lap3
pmp22b	4.55237e-06	0.269789	1	1	0.115034	48h-prol-LEC	pmp22b
ppp6c.1	1.42224e-09	0.269704	0.904	0.79	3.59386e-05	48h-prol-LEC	ppp6c
atp5po.1	1.13984e-05	0.269596	0.981	0.933	0.288025	48h-prol-LEC	atp5po
igf2bp3	1.58976e-05	0.267035	0.804	0.752	0.401717	48h-prol-LEC	igf2bp3
ndrg3b.1	1.6697e-06	0.26601	0.683	0.548	0.0421917	48h-prol-LEC	ndrg3b
angel2.1	2.05539e-08	0.265686	0.595	0.433	0.000519377	48h-prol-LEC	angel2
sdhb.1	1.80556e-10	0.265433	0.938	0.851	4.56248e-06	48h-prol-LEC	sdhb
midn.2	1.16153e-06	0.265051	0.983	0.955	0.0293508	48h-prol-LEC	midn
acvr1l	5.86734e-07	0.264754	0.898	0.827	0.0148262	48h-prol-LEC	acvr1l
ppib.2	5.93276e-08	0.264666	1	0.996	0.00149915	48h-prol-LEC	ppib
pitpnb	4.74217e-09	0.264554	0.683	0.511	0.00011983	48h-prol-LEC	pitpnb
elavl1a.1	5.4276e-09	0.263631	0.638	0.487	0.00013715	48h-prol-LEC	elavl1a
atp5mc1.1	3.35884e-08	0.262878	0.957	0.868	0.000848745	48h-prol-LEC	atp5mc1
CABZ01101813.1.1	3.92454e-05	0.262734	0.587	0.469	0.991692	48h-prol-LEC	CABZ01101813.1
mrpl28.1	3.14265e-06	0.262487	0.519	0.391	0.0794115	48h-prol-LEC	mrpl28
dmap1.1	3.3072e-08	0.261991	0.668	0.527	0.000835695	48h-prol-LEC	dmap1
polr2c.1	6.57419e-09	0.261045	0.739	0.593	0.000166123	48h-prol-LEC	polr2c
lman2.1	2.56023e-07	0.260982	0.978	0.935	0.00646945	48h-prol-LEC	lman2
dhx8.1	5.96333e-06	0.26075	0.618	0.497	0.150687	48h-prol-LEC	dhx8
bzw1b.2	1.65346e-11	0.260725	0.963	0.911	4.17813e-07	48h-prol-LEC	bzw1b
phb2b.1	2.29936e-09	0.260715	0.519	0.365	5.81026e-05	48h-prol-LEC	phb2b
ikbkg.1	7.74546e-12	0.258875	0.632	0.449	1.9572e-07	48h-prol-LEC	ikbkg
mibp2.1	1.90276e-07	0.258607	0.961	0.915	0.0048081	48h-prol-LEC	mibp2
hnrnpa0l.1	3.76352e-08	0.258564	1	1	0.000951004	48h-prol-LEC	hnrnpa0l
cd99l2.1	1.7893e-07	0.258385	0.97	0.921	0.00452138	48h-prol-LEC	cd99l2
sap30l.1	2.74251e-07	0.258246	0.893	0.799	0.00693005	48h-prol-LEC	sap30l
entpd6.1	6.36135e-09	0.258207	0.733	0.576	0.000160745	48h-prol-LEC	entpd6
wdr33.2	1.07351e-09	0.257622	0.705	0.511	2.71265e-05	48h-prol-LEC	wdr33
ppid.1	5.39315e-13	0.257399	0.806	0.653	1.36279e-08	48h-prol-LEC	ppid
morf4l1.1	6.47419e-09	0.256902	0.938	0.854	0.000163596	48h-prol-LEC	morf4l1
vps18.1	1.24345e-07	0.256157	0.635	0.508	0.00314208	48h-prol-LEC	vps18
ptmab.2	2.78184e-09	0.254649	1	1	7.02944e-05	48h-prol-LEC	ptmab
rwdd1.1	3.67152e-08	0.254611	0.761	0.632	0.000927756	48h-prol-LEC	rwdd1
riok3.2	1.09501e-07	0.254576	0.688	0.555	0.00276697	48h-prol-LEC	riok3
rimkla.1	2.42473e-11	0.254226	0.925	0.892	6.12704e-07	48h-prol-LEC	rimkla
prpf40a.2	2.76913e-13	0.253896	0.899	0.78	6.99732e-09	48h-prol-LEC	prpf40a
fam234a	1.01089e-06	0.253175	0.68	0.542	0.0255441	48h-prol-LEC	fam234a
pi4k2b	1.07266e-09	0.252889	0.55	0.381	2.71052e-05	48h-prol-LEC	pi4k2b
coro1cb.1	1.01577e-06	0.252815	0.898	0.819	0.0256676	48h-prol-LEC	coro1cb
pabpn1.1	1.50323e-08	0.252067	0.915	0.806	0.000379851	48h-prol-LEC	pabpn1
ciao1.1	2.1909e-11	0.251044	0.738	0.584	5.5362e-07	48h-prol-LEC	ciao1
CABZ01072952.1	5.47508e-06	0.250723	0.516	0.37	0.13835	48h-prol-LEC	CABZ01072952.1
ddx19.1	6.34354e-10	0.250636	0.747	0.591	1.60295e-05	48h-prol-LEC	ddx19
abcf3.1	2.2468e-08	0.250443	0.511	0.358	0.000567745	48h-prol-LEC	abcf3
man1a1.1	8.98357e-06	0.250317	0.685	0.569	0.227006	48h-prol-LEC	man1a1
tor4aa.1	1.26632e-07	0.250306	0.806	0.707	0.00319985	48h-prol-LEC	tor4aa
hnrnpl2.1	1.36597e-08	0.250243	0.984	0.975	0.000345167	48h-prol-LEC	hnrnpl2
psma1.1	6.10461e-08	0.250047	0.994	0.95	0.00154257	48h-prol-LEC	psma1
nudcd1.1	1.03869e-08	0.248883	0.553	0.407	0.000262468	48h-prol-LEC	nudcd1
polr2d.1	1.93277e-05	0.248313	0.539	0.399	0.488391	48h-prol-LEC	polr2d
tia1l.1	1.04691e-08	0.248051	0.981	0.935	0.000264544	48h-prol-LEC	tia1l
rae1.1	6.67398e-10	0.24757	0.803	0.684	1.68645e-05	48h-prol-LEC	rae1
CABZ01112656.1	1.71194e-07	0.247382	0.694	0.538	0.0043259	48h-prol-LEC	CABZ01112656.1
bcat2.1	1.25155e-10	0.247237	0.707	0.565	3.16255e-06	48h-prol-LEC	bcat2
acin1a.2	1.66226e-05	0.24718	0.966	0.933	0.420038	48h-prol-LEC	acin1a
si:ch211-226m16.2.1	2.72189e-13	0.246516	0.638	0.477	6.87795e-09	48h-prol-LEC	si:ch211-226m16.2
vps37c	5.67557e-07	0.246397	0.522	0.382	0.0143416	48h-prol-LEC	vps37c
dcaf7.1	1.55547e-09	0.246213	0.975	0.932	3.93051e-05	48h-prol-LEC	dcaf7
atp8b5a.1	2.33485e-08	0.246163	0.601	0.446	0.000589994	48h-prol-LEC	atp8b5a
suclg1.1	7.37108e-07	0.245936	0.894	0.805	0.018626	48h-prol-LEC	suclg1
pus7.2	4.34749e-14	0.245921	0.506	0.324	1.09857e-09	48h-prol-LEC	pus7
ppm1bb	3.31758e-06	0.245665	0.761	0.661	0.0838319	48h-prol-LEC	ppm1bb
yju2	1.78426e-06	0.245357	0.697	0.595	0.0450864	48h-prol-LEC	yju2
paip2b.1	2.96229e-05	0.245139	0.589	0.472	0.74854	48h-prol-LEC	paip2b
tpra.2	1.35225e-09	0.244786	0.648	0.489	3.417e-05	48h-prol-LEC	tpra
fzd7b.1	7.0581e-08	0.244765	0.856	0.748	0.00178351	48h-prol-LEC	fzd7b
tnfsf10.2	2.3364e-05	0.244383	0.648	0.538	0.590384	48h-prol-LEC	tnfsf10
cebpb.1	3.70262e-06	0.244319	0.548	0.439	0.0935615	48h-prol-LEC	cebpb
rpl15.2	2.09493e-06	0.243577	1	1	0.0529369	48h-prol-LEC	rpl15
pdzd11.1	1.5593e-06	0.243498	0.731	0.633	0.039402	48h-prol-LEC	pdzd11
sap130b.1	9.4738e-06	0.243437	0.755	0.649	0.239393	48h-prol-LEC	sap130b
eif1axb.1	3.52528e-05	0.24338	0.893	0.793	0.890804	48h-prol-LEC	eif1axb
atf4b	4.52634e-06	0.242923	0.989	0.979	0.114376	48h-prol-LEC	atf4b
lamtor4.1	3.27566e-08	0.242663	0.573	0.432	0.000827727	48h-prol-LEC	lamtor4
smarcd1.1	6.42578e-07	0.242215	0.957	0.928	0.0162373	48h-prol-LEC	smarcd1
farsa.1	1.7624e-10	0.241969	0.772	0.653	4.45341e-06	48h-prol-LEC	farsa
tmco1.2	7.01401e-10	0.241509	0.624	0.458	1.77237e-05	48h-prol-LEC	tmco1
hspa14.1	1.23688e-06	0.24129	0.724	0.649	0.0312548	48h-prol-LEC	hspa14
chtopa.1	8.17518e-07	0.241221	0.885	0.81	0.0206579	48h-prol-LEC	chtopa
nutf2.1	1.11134e-12	0.240979	0.887	0.758	2.80824e-08	48h-prol-LEC	nutf2
hspa4a.1	6.92575e-13	0.240919	0.724	0.574	1.75007e-08	48h-prol-LEC	hspa4a
pgrmc2.1	2.50149e-08	0.240626	0.941	0.884	0.000632103	48h-prol-LEC	pgrmc2
ip6k2a.2	3.39427e-06	0.240371	0.845	0.759	0.0857699	48h-prol-LEC	ip6k2a
acp2.1	3.30537e-08	0.240117	0.604	0.45	0.000835234	48h-prol-LEC	acp2
ponzr1	3.81943e-06	0.239924	0.944	0.887	0.0965132	48h-prol-LEC	ponzr1
sumo2b.1	3.64382e-06	0.239909	0.922	0.86	0.0920756	48h-prol-LEC	sumo2b
si:ch211-266o15.1.1	4.2338e-07	0.239114	0.705	0.593	0.0106984	48h-prol-LEC	si:ch211-266o15.1
dohh.1	8.34753e-09	0.238901	0.589	0.438	0.000210934	48h-prol-LEC	dohh
gstr.1	2.82313e-06	0.23875	0.89	0.778	0.0713376	48h-prol-LEC	gstr
ndufs7.1	7.92575e-08	0.238496	0.775	0.629	0.00200276	48h-prol-LEC	ndufs7
tek.2	2.10373e-05	0.238374	1	0.999	0.531592	48h-prol-LEC	tek
hnrnpc.1	8.64009e-12	0.238046	0.893	0.785	2.18327e-07	48h-prol-LEC	hnrnpc
aqr.1	8.96285e-14	0.237886	0.592	0.421	2.26482e-09	48h-prol-LEC	aqr
ppme1.1	1.69423e-07	0.237757	0.59	0.459	0.00428115	48h-prol-LEC	ppme1
zgc:162698.1	5.41255e-06	0.23768	0.748	0.626	0.13677	48h-prol-LEC	zgc:162698
srsf11	5.53455e-06	0.236945	0.986	0.967	0.139853	48h-prol-LEC	srsf11
spg21.2	1.1139e-07	0.236446	0.542	0.384	0.00281471	48h-prol-LEC	spg21
psmb2.1	2.87057e-05	0.236221	0.911	0.858	0.725365	48h-prol-LEC	psmb2
glrx.1	7.829e-07	0.23621	0.694	0.535	0.0197831	48h-prol-LEC	glrx
meaf6.1	7.04065e-08	0.235141	0.705	0.567	0.0017791	48h-prol-LEC	meaf6
upf1.1	1.85682e-07	0.234896	0.772	0.649	0.00469199	48h-prol-LEC	upf1
eef1b2.1	1.54998e-07	0.234826	1	1	0.00391664	48h-prol-LEC	eef1b2
arid2.1	3.05604e-07	0.234738	0.556	0.424	0.00772231	48h-prol-LEC	arid2
caska.1	1.04039e-06	0.234712	0.505	0.365	0.0262896	48h-prol-LEC	caska
laynb.1	1.59696e-06	0.234466	0.545	0.399	0.0403537	48h-prol-LEC	laynb
hs6st2.2	1.99965e-09	0.234105	0.691	0.559	5.0529e-05	48h-prol-LEC	hs6st2
szrd1.1	9.32585e-06	0.233858	0.72	0.599	0.235655	48h-prol-LEC	szrd1
spry2.1	1.77373e-08	0.23304	0.905	0.858	0.000448204	48h-prol-LEC	spry2
aurkaip1.1	2.93524e-07	0.232923	0.598	0.46	0.00741706	48h-prol-LEC	aurkaip1
mapkapk2a.2	3.32466e-10	0.232708	0.873	0.779	8.40108e-06	48h-prol-LEC	mapkapk2a
rprd2a.1	2.63423e-07	0.232553	0.565	0.418	0.00665644	48h-prol-LEC	rprd2a
flrt3.2	1.34235e-05	0.232501	0.961	0.933	0.339199	48h-prol-LEC	flrt3
nansa.1	4.1739e-06	0.232335	0.629	0.507	0.10547	48h-prol-LEC	nansa
siah1	2.55742e-09	0.23209	0.693	0.547	6.46235e-05	48h-prol-LEC	siah1
nup153.1	2.60924e-06	0.232005	0.826	0.729	0.0659328	48h-prol-LEC	nup153
mob3a.1	9.35309e-10	0.231537	0.821	0.705	2.36343e-05	48h-prol-LEC	mob3a
wbp1	5.76859e-08	0.231317	0.675	0.514	0.00145766	48h-prol-LEC	wbp1
rpl6.2	8.36769e-09	0.231196	1	1	0.000211443	48h-prol-LEC	rpl6
asap1a.1	1.34597e-05	0.231124	0.699	0.581	0.340114	48h-prol-LEC	asap1a
sart3.1	5.57254e-08	0.23091	0.623	0.507	0.00140813	48h-prol-LEC	sart3
nkain1.1	1.73108e-06	0.230654	0.697	0.576	0.0437427	48h-prol-LEC	nkain1
plrg1.1	2.36253e-09	0.23056	0.711	0.584	5.96989e-05	48h-prol-LEC	plrg1
echs1.1	1.15291e-10	0.230438	0.781	0.644	2.91328e-06	48h-prol-LEC	echs1
daxx	3.04224e-06	0.230345	0.556	0.408	0.0768743	48h-prol-LEC	daxx
katnb1	6.50538e-08	0.230218	0.731	0.585	0.00164384	48h-prol-LEC	katnb1
ctsc.1	3.60297e-05	0.229689	0.807	0.734	0.910436	48h-prol-LEC	ctsc
ap2m1b.1	8.14902e-07	0.229265	0.952	0.918	0.0205918	48h-prol-LEC	ap2m1b
cab39l1	1.8472e-05	0.228994	0.752	0.637	0.466769	48h-prol-LEC	cab39l1
hikeshi.1	2.00659e-06	0.228799	0.547	0.432	0.0507045	48h-prol-LEC	hikeshi
gadd45gip1	1.87969e-06	0.228681	0.62	0.48	0.0474979	48h-prol-LEC	gadd45gip1
slc35b4.1	7.61887e-10	0.228593	0.702	0.55	1.92521e-05	48h-prol-LEC	slc35b4
ap2a1.2	1.81333e-05	0.228422	0.977	0.943	0.458209	48h-prol-LEC	ap2a1
senp2.2	1.15457e-10	0.22841	0.675	0.523	2.91747e-06	48h-prol-LEC	senp2
si:ch211-59o9.10.2	9.36529e-09	0.22802	0.634	0.501	0.000236652	48h-prol-LEC	si:ch211-59o9.10
C23H1orf52.1	1.39992e-08	0.227797	0.767	0.659	0.000353745	48h-prol-LEC	C23H1orf52
ybx1.1	1.51898e-08	0.227598	1	1	0.000383832	48h-prol-LEC	ybx1
klhl4.1	2.10415e-05	0.227457	0.955	0.899	0.531697	48h-prol-LEC	klhl4
tbl2.1	7.23546e-09	0.227316	0.769	0.65	0.000182833	48h-prol-LEC	tbl2
mettl3	8.21168e-07	0.22729	0.562	0.433	0.0207501	48h-prol-LEC	mettl3
arid1aa.1	6.16582e-06	0.227179	0.666	0.537	0.155804	48h-prol-LEC	arid1aa
ndufb5.1	3.51396e-08	0.227098	0.648	0.479	0.000887942	48h-prol-LEC	ndufb5
mrps30.1	3.01837e-07	0.226935	0.747	0.643	0.00762713	48h-prol-LEC	mrps30
smarca4a.1	1.17939e-05	0.225963	0.986	0.969	0.298019	48h-prol-LEC	smarca4a
srsf3a.1	1.95323e-08	0.225887	0.714	0.541	0.000493561	48h-prol-LEC	srsf3a
hmcn2.1	2.17064e-13	0.225242	0.547	0.378	5.485e-09	48h-prol-LEC	hmcn2
tktb.2	3.97241e-12	0.224749	0.913	0.817	1.00379e-07	48h-prol-LEC	tktb
rpl4.1	3.17224e-08	0.224496	1	1	0.000801594	48h-prol-LEC	rpl4
tomm40.1	8.58114e-07	0.224135	0.887	0.82	0.0216837	48h-prol-LEC	tomm40
ythdf1	3.86546e-06	0.224091	0.742	0.642	0.0976762	48h-prol-LEC	ythdf1
trim33l	2.65775e-06	0.223485	0.542	0.404	0.0671586	48h-prol-LEC	trim33l
acp1.1	5.87814e-09	0.22255	0.714	0.596	0.000148535	48h-prol-LEC	acp1
psmc6.1	3.66893e-06	0.222427	0.991	0.973	0.0927101	48h-prol-LEC	psmc6
slc39a7.2	2.81212e-08	0.222245	0.952	0.909	0.000710594	48h-prol-LEC	slc39a7
rhd.1	1.02267e-12	0.221704	0.537	0.363	2.58418e-08	48h-prol-LEC	rhd
tra2b.1	1.56558e-07	0.221582	0.615	0.48	0.00395608	48h-prol-LEC	tra2b
gpx4b.1	2.61627e-05	0.221555	0.97	0.929	0.661106	48h-prol-LEC	gpx4b
ndufa9a.1	2.37038e-06	0.221115	0.797	0.68	0.059897	48h-prol-LEC	ndufa9a
rpl3.2	3.28279e-08	0.220744	1	1	0.000829527	48h-prol-LEC	rpl3
ube2v2.1	1.24169e-06	0.220734	0.818	0.715	0.0313763	48h-prol-LEC	ube2v2
plscr3b.1	1.87524e-08	0.220438	0.925	0.873	0.000473855	48h-prol-LEC	plscr3b
gpatch3	4.81067e-06	0.220141	0.635	0.518	0.121561	48h-prol-LEC	gpatch3
hacd3.1	9.07291e-07	0.22009	0.553	0.458	0.0229263	48h-prol-LEC	hacd3
sel1l	6.02967e-06	0.22	0.809	0.738	0.152364	48h-prol-LEC	sel1l
rpsa.2	1.83468e-07	0.219666	1	1	0.00463606	48h-prol-LEC	rpsa
epc2.1	2.02684e-09	0.219555	0.655	0.511	5.12163e-05	48h-prol-LEC	epc2
dhrs12.1	3.91967e-07	0.219297	0.533	0.381	0.00990462	48h-prol-LEC	dhrs12
psmg2.1	8.75504e-06	0.219104	0.615	0.52	0.221231	48h-prol-LEC	psmg2
slc35c2.1	2.46931e-05	0.218938	0.722	0.596	0.62397	48h-prol-LEC	slc35c2
commd7.1	1.45077e-05	0.218899	0.573	0.452	0.366596	48h-prol-LEC	commd7
tardbpl.1	4.82635e-08	0.218708	0.978	0.946	0.00121957	48h-prol-LEC	tardbpl
xpnpep1.1	1.22834e-08	0.218261	0.711	0.574	0.000310388	48h-prol-LEC	xpnpep1
ppp4cb.1	1.37948e-09	0.217786	0.941	0.841	3.4858e-05	48h-prol-LEC	ppp4cb
eif4g2b.1	1.58316e-06	0.21766	0.998	0.996	0.0400049	48h-prol-LEC	eif4g2b
zgc:113411.1	8.01621e-09	0.217422	0.556	0.394	0.000202562	48h-prol-LEC	zgc:113411
ptges3a.1	3.60172e-08	0.21715	0.73	0.596	0.00091012	48h-prol-LEC	ptges3a
larp7	4.65676e-08	0.216921	0.539	0.388	0.00117672	48h-prol-LEC	larp7
gmpr2	5.41254e-10	0.216731	0.519	0.357	1.36769e-05	48h-prol-LEC	gmpr2
hnrnpl.1	1.7605e-05	0.216684	0.994	0.989	0.444861	48h-prol-LEC	hnrnpl
eif4ba.1	4.50809e-06	0.216678	0.548	0.421	0.113915	48h-prol-LEC	eif4ba
ube2ia.1	3.30146e-07	0.216515	0.834	0.68	0.00834245	48h-prol-LEC	ube2ia
zc4h2	6.71149e-08	0.216427	0.747	0.633	0.00169593	48h-prol-LEC	zc4h2
cpsf2.2	1.04445e-10	0.215586	0.778	0.643	2.63923e-06	48h-prol-LEC	cpsf2
gpkow.1	1.79116e-08	0.215486	0.674	0.534	0.000452609	48h-prol-LEC	gpkow
psma5.1	1.79629e-07	0.21545	0.969	0.914	0.00453905	48h-prol-LEC	psma5
rnf14.1	6.90295e-09	0.215357	0.73	0.588	0.000174431	48h-prol-LEC	rnf14
snrpa1.1	1.23477e-08	0.215072	0.702	0.545	0.000312014	48h-prol-LEC	snrpa1
srsf5a.2	2.5766e-06	0.214972	1	1	0.0651081	48h-prol-LEC	srsf5a
hdac1.1	7.95252e-06	0.214883	1	1	0.200952	48h-prol-LEC	hdac1
cct6a.1	3.44848e-07	0.214438	0.989	0.972	0.00871397	48h-prol-LEC	cct6a
lonrf1l.1	1.10176e-09	0.214349	0.655	0.455	2.78403e-05	48h-prol-LEC	lonrf1l
mmp14b.1	1.37062e-08	0.213974	0.997	0.984	0.000346342	48h-prol-LEC	mmp14b
rps7.2	2.42742e-06	0.212854	1	1	0.0613385	48h-prol-LEC	rps7
rtraf.1	4.90612e-07	0.212802	0.534	0.381	0.0123973	48h-prol-LEC	rtraf
cdc27.1	1.06534e-08	0.212771	0.75	0.635	0.000269202	48h-prol-LEC	cdc27
tshz3a.1	2.83276e-08	0.21196	0.7	0.574	0.000715809	48h-prol-LEC	tshz3a
hmg20b	4.86889e-08	0.211786	0.654	0.52	0.00123032	48h-prol-LEC	hmg20b
txn2.1	8.80251e-09	0.211134	0.52	0.351	0.000222431	48h-prol-LEC	txn2
suz12b.1	1.12186e-06	0.210564	0.607	0.472	0.0283483	48h-prol-LEC	suz12b
ndufs4	1.10838e-05	0.210555	0.531	0.392	0.280076	48h-prol-LEC	ndufs4
mtmr8.2	1.61001e-06	0.210516	0.888	0.83	0.0406833	48h-prol-LEC	mtmr8
aimp1a.1	2.83993e-12	0.210146	0.769	0.606	7.17622e-08	48h-prol-LEC	aimp1a
psmd14.1	3.53436e-10	0.208673	0.89	0.785	8.93098e-06	48h-prol-LEC	psmd14
ptp4a2b.2	7.47096e-10	0.208605	0.884	0.775	1.88784e-05	48h-prol-LEC	ptp4a2b
nars1.1	5.81175e-09	0.208499	0.89	0.841	0.000146857	48h-prol-LEC	nars1
med25	5.45563e-07	0.207659	0.702	0.568	0.0137858	48h-prol-LEC	med25
farsb.1	2.1904e-08	0.207521	0.731	0.616	0.000553493	48h-prol-LEC	farsb
nol10.2	1.81153e-12	0.206822	0.607	0.435	4.57755e-08	48h-prol-LEC	nol10
cct7.1	2.87615e-06	0.206578	0.997	0.984	0.0726775	48h-prol-LEC	cct7
arpc1b	2.06503e-07	0.205971	0.831	0.735	0.00521812	48h-prol-LEC	arpc1b
cct5.1	2.68337e-05	0.205944	1	0.987	0.67806	48h-prol-LEC	cct5
znf576.2.1	2.14951e-07	0.205909	0.783	0.686	0.0054316	48h-prol-LEC	znf576.2
pdia7.1	1.37866e-09	0.20527	0.935	0.853	3.48373e-05	48h-prol-LEC	pdia7
pdia4.1	7.10716e-12	0.204079	0.859	0.748	1.79591e-07	48h-prol-LEC	pdia4
eif2s3.1	2.73073e-07	0.203538	0.991	0.98	0.00690029	48h-prol-LEC	eif2s3
fdx2.1	7.40927e-07	0.20291	0.564	0.436	0.0187225	48h-prol-LEC	fdx2
psat1.2	3.37197e-15	0.20287	0.818	0.646	8.52062e-11	48h-prol-LEC	psat1
ZNF521.2	2.12209e-07	0.20205	0.571	0.432	0.00536232	48h-prol-LEC	ZNF521
luc7l3.1	6.78343e-07	0.200609	0.654	0.535	0.017141	48h-prol-LEC	luc7l3
nat10.2	2.55072e-13	0.200538	0.57	0.402	6.44542e-09	48h-prol-LEC	nat10
psmb3.1	4.39291e-07	0.200514	0.966	0.887	0.0111004	48h-prol-LEC	psmb3
ndnf.2	1.04801e-05	0.200317	0.693	0.601	0.26482	48h-prol-LEC	ndnf
tal1.1	9.01308e-12	0.200022	0.798	0.673	2.27752e-07	48h-prol-LEC	tal1
rlf.1	1.07478e-10	0.199759	0.575	0.388	2.71586e-06	48h-prol-LEC	rlf
uba3	1.89162e-06	0.199607	0.557	0.421	0.0477993	48h-prol-LEC	uba3
psmc1a.1	7.50391e-08	0.199201	0.981	0.936	0.00189616	48h-prol-LEC	psmc1a
sart1	1.09584e-09	0.199155	0.859	0.769	2.76907e-05	48h-prol-LEC	sart1
mbd3a.1	2.51113e-06	0.199117	0.915	0.814	0.0634538	48h-prol-LEC	mbd3a
ankrd12.1	7.42267e-09	0.199109	0.717	0.561	0.000187563	48h-prol-LEC	ankrd12
nup98.1	1.25527e-07	0.199079	0.702	0.578	0.00317195	48h-prol-LEC	nup98
dnajc21.2	5.95321e-10	0.198672	0.542	0.399	1.50432e-05	48h-prol-LEC	dnajc21
phf2	3.92113e-05	0.198252	0.616	0.507	0.990831	48h-prol-LEC	phf2
xrn2.1	2.8907e-07	0.198239	0.828	0.722	0.00730451	48h-prol-LEC	xrn2
syf2	1.13339e-07	0.198133	0.716	0.567	0.00286396	48h-prol-LEC	syf2
sh3glb1b	1.47941e-07	0.197822	0.724	0.591	0.00373831	48h-prol-LEC	sh3glb1b
slc25a55a.2	3.56013e-09	0.197816	0.901	0.822	8.99609e-05	48h-prol-LEC	slc25a55a
lrrc8aa.1	3.70604e-11	0.197308	0.73	0.586	9.36479e-07	48h-prol-LEC	lrrc8aa
psmd6.1	4.69653e-09	0.197016	0.969	0.911	0.000118677	48h-prol-LEC	psmd6
mccc1.1	7.5634e-11	0.196424	0.748	0.632	1.91119e-06	48h-prol-LEC	mccc1
smarcc1a.1	7.43887e-09	0.196174	0.969	0.919	0.000187973	48h-prol-LEC	smarcc1a
usp5.1	5.10644e-11	0.195972	0.941	0.892	1.29035e-06	48h-prol-LEC	usp5
brd7.1	1.56336e-05	0.195922	0.734	0.643	0.395044	48h-prol-LEC	brd7
hibadhb.1	7.70401e-07	0.195176	0.787	0.704	0.0194673	48h-prol-LEC	hibadhb
srsf4.1	1.09998e-08	0.194311	0.91	0.819	0.000277954	48h-prol-LEC	srsf4
fabp3.1	3.89653e-08	0.193889	0.509	0.363	0.000984613	48h-prol-LEC	fabp3
cyc1	4.63693e-07	0.193793	0.977	0.918	0.0117171	48h-prol-LEC	cyc1
pgghg.1	2.35926e-07	0.192952	0.528	0.397	0.00596161	48h-prol-LEC	pgghg
chsy1.1	5.17412e-08	0.192785	0.553	0.426	0.00130745	48h-prol-LEC	chsy1
stx5al	9.07008e-09	0.191599	0.526	0.36	0.000229192	48h-prol-LEC	stx5al
mrpl23.1	2.26633e-10	0.190564	0.612	0.443	5.72679e-06	48h-prol-LEC	mrpl23
srm	4.31711e-08	0.190426	0.646	0.503	0.00109089	48h-prol-LEC	srm
psen2	6.2059e-08	0.190358	0.585	0.438	0.00156817	48h-prol-LEC	psen2
spcs2	5.54633e-08	0.190044	0.871	0.788	0.0014015	48h-prol-LEC	spcs2
psmb6.1	1.97292e-06	0.189992	0.924	0.856	0.0498538	48h-prol-LEC	psmb6
lemd3	9.36596e-06	0.189348	0.775	0.694	0.236668	48h-prol-LEC	lemd3
ccn1.1	7.98971e-10	0.189175	0.669	0.544	2.01892e-05	48h-prol-LEC	ccn1
usp3.1	9.66322e-12	0.188953	0.554	0.381	2.4418e-07	48h-prol-LEC	usp3
psmd4b.1	6.03009e-09	0.188921	0.876	0.754	0.000152374	48h-prol-LEC	psmd4b
ftsj3.2	2.72071e-10	0.188494	0.514	0.35	6.87496e-06	48h-prol-LEC	ftsj3
slc16a9b.1	3.85549e-09	0.188116	0.575	0.432	9.74244e-05	48h-prol-LEC	slc16a9b
gsk3ab	5.29843e-07	0.18811	0.936	0.865	0.0133886	48h-prol-LEC	gsk3ab
cdv3.1	5.64317e-11	0.186823	0.933	0.85	1.42597e-06	48h-prol-LEC	cdv3
uqcc1.1	1.13055e-11	0.186217	0.739	0.551	2.8568e-07	48h-prol-LEC	uqcc1
psmb7.1	1.82216e-06	0.185796	0.995	0.987	0.0460441	48h-prol-LEC	psmb7
rsl1d1.1	2.80331e-14	0.185773	0.517	0.329	7.08367e-10	48h-prol-LEC	rsl1d1
med7.1	1.73707e-07	0.185333	0.52	0.364	0.00438941	48h-prol-LEC	med7
baz2a.1	4.32425e-07	0.185091	0.711	0.591	0.010927	48h-prol-LEC	baz2a
si:dkey-73n10.1.1	3.84543e-07	0.184284	0.579	0.453	0.00971702	48h-prol-LEC	si:dkey-73n10.1
dbi	2.64055e-05	0.184165	0.826	0.722	0.66724	48h-prol-LEC	dbi
mcl1a.1	4.56287e-08	0.184015	0.842	0.718	0.00115299	48h-prol-LEC	mcl1a
rabggtb.1	1.65584e-06	0.183938	0.738	0.601	0.0418415	48h-prol-LEC	rabggtb
col5a2a.1	5.50643e-11	0.181687	0.505	0.361	1.39142e-06	48h-prol-LEC	col5a2a
EML4	6.26133e-06	0.181354	0.654	0.504	0.158217	48h-prol-LEC	EML4
gtf2ird1	2.24327e-05	0.181298	0.585	0.462	0.566852	48h-prol-LEC	gtf2ird1
m6pr.1	2.37244e-11	0.181152	0.568	0.375	5.99492e-07	48h-prol-LEC	m6pr
kat7b.1	5.73706e-06	0.180846	0.717	0.623	0.14497	48h-prol-LEC	kat7b
gabpa.1	6.56039e-06	0.180835	0.978	0.962	0.165774	48h-prol-LEC	gabpa
rbfox2.1	1.85421e-05	0.180546	0.77	0.684	0.46854	48h-prol-LEC	rbfox2
bckdha.1	9.47653e-09	0.180249	0.7	0.568	0.000239463	48h-prol-LEC	bckdha
srpra.1	1.13858e-10	0.179152	0.787	0.673	2.87708e-06	48h-prol-LEC	srpra
znf827	2.56026e-07	0.178806	0.964	0.912	0.00646953	48h-prol-LEC	znf827
tnfrsf1a.1	8.14802e-09	0.178433	0.561	0.412	0.000205892	48h-prol-LEC	tnfrsf1a
plod3.1	7.42356e-09	0.178416	0.936	0.88	0.000187586	48h-prol-LEC	plod3
sf3b3.1	3.64197e-11	0.177914	0.834	0.718	9.20289e-07	48h-prol-LEC	sf3b3
fkbp10b.1	1.34713e-07	0.177881	0.671	0.589	0.00340405	48h-prol-LEC	fkbp10b
hmgb1a.1	3.08377e-08	0.176769	0.969	0.897	0.000779238	48h-prol-LEC	hmgb1a
napab	1.84552e-09	0.175623	0.849	0.732	4.66344e-05	48h-prol-LEC	napab
fam49a	6.46888e-09	0.175399	0.585	0.418	0.000163462	48h-prol-LEC	fam49a
tcp1.1	5.46991e-07	0.174838	0.998	0.989	0.0138219	48h-prol-LEC	tcp1
fh	3.53885e-08	0.174759	0.806	0.664	0.000894233	48h-prol-LEC	fh
porb.1	9.18402e-14	0.174736	0.585	0.364	2.32071e-09	48h-prol-LEC	porb
pdha1a.1	4.6343e-07	0.174732	0.922	0.824	0.0117104	48h-prol-LEC	pdha1a
anxa4.2	1.16681e-06	0.174668	0.974	0.922	0.0294842	48h-prol-LEC	anxa4
ilf2.2	3.24624e-06	0.174029	0.995	0.992	0.0820294	48h-prol-LEC	ilf2
cyth1b	1.34716e-06	0.173379	0.766	0.636	0.0340414	48h-prol-LEC	cyth1b
si:dkey-156n14.3.1	1.87796e-07	0.172477	0.528	0.377	0.00474541	48h-prol-LEC	si:dkey-156n14.3
aplp2.1	1.36663e-05	0.172442	0.944	0.899	0.345334	48h-prol-LEC	aplp2
mfsd12a.1	6.99098e-10	0.172392	0.551	0.385	1.76655e-05	48h-prol-LEC	mfsd12a
jkamp.2	1.6343e-08	0.172336	0.626	0.46	0.000412972	48h-prol-LEC	jkamp
c1galt1b.1	6.22201e-07	0.172118	0.641	0.496	0.0157224	48h-prol-LEC	c1galt1b
preb	1.36738e-06	0.171825	0.543	0.433	0.0345524	48h-prol-LEC	preb
txndc5.1	5.28039e-10	0.17178	0.969	0.929	1.3343e-05	48h-prol-LEC	txndc5
fip1l1b.1	2.98064e-09	0.170247	0.857	0.746	7.53177e-05	48h-prol-LEC	fip1l1b
G3BP2.1	2.22981e-06	0.170097	0.978	0.96	0.0563451	48h-prol-LEC	G3BP2
blzf1.1	7.86751e-07	0.169473	0.548	0.399	0.0198804	48h-prol-LEC	blzf1
gnl2.1	4.39819e-11	0.169343	0.554	0.391	1.11138e-06	48h-prol-LEC	gnl2
ergic2	3.85242e-07	0.169148	0.762	0.636	0.00973469	48h-prol-LEC	ergic2
aldh6a1.1	6.95614e-10	0.168762	0.918	0.891	1.75775e-05	48h-prol-LEC	aldh6a1
cdc73	8.73139e-13	0.168751	0.825	0.663	2.20633e-08	48h-prol-LEC	cdc73
phb.1	1.81306e-08	0.168134	0.795	0.674	0.000458143	48h-prol-LEC	phb
thrap3b.1	4.54482e-07	0.167995	0.888	0.769	0.0114843	48h-prol-LEC	thrap3b
ift74	9.11673e-08	0.166637	0.705	0.582	0.00230371	48h-prol-LEC	ift74
prelid1a	7.41618e-10	0.166323	0.804	0.671	1.874e-05	48h-prol-LEC	prelid1a
rps4x.1	7.55716e-06	0.165712	1	1	0.190962	48h-prol-LEC	rps4x
ccdc174	5.63881e-06	0.165676	0.512	0.368	0.142487	48h-prol-LEC	ccdc174
oxa1l.2	5.57e-17	0.165646	0.683	0.467	1.40748e-12	48h-prol-LEC	oxa1l
scaf4a.1	1.6605e-06	0.165518	0.691	0.595	0.041959	48h-prol-LEC	scaf4a
prpf31.2	1.10406e-11	0.165495	0.783	0.601	2.78985e-07	48h-prol-LEC	prpf31
pofut1.1	3.64547e-07	0.165195	0.68	0.542	0.00921174	48h-prol-LEC	pofut1
rnf130.1	8.7788e-06	0.165092	0.756	0.664	0.221832	48h-prol-LEC	rnf130
si:ch211-262i1.6.1	2.77375e-05	0.164438	0.674	0.569	0.7009	48h-prol-LEC	si:ch211-262i1.6
anxa11a	4.58841e-08	0.164266	0.984	0.966	0.00115944	48h-prol-LEC	anxa11a
hira	1.27342e-05	0.163836	0.565	0.438	0.321781	48h-prol-LEC	hira
baz1a:1.1	7.32958e-06	0.163801	0.54	0.412	0.185211	48h-prol-LEC	baz1a:1
spag1a	3.88123e-05	0.163417	0.571	0.47	0.980748	48h-prol-LEC	spag1a
pafah1b3.1	3.85182e-05	0.163205	0.807	0.697	0.973315	48h-prol-LEC	pafah1b3
brd3a	7.02147e-11	0.162718	0.835	0.694	1.77426e-06	48h-prol-LEC	brd3a
gspt1l.1	4.51223e-08	0.162633	0.978	0.962	0.0011402	48h-prol-LEC	gspt1l
slc25a51b.1	5.41439e-07	0.162579	0.528	0.388	0.0136816	48h-prol-LEC	slc25a51b
kctd5a	1.23675e-05	0.162094	0.898	0.839	0.312515	48h-prol-LEC	kctd5a
psph	4.91754e-06	0.161763	0.885	0.806	0.124261	48h-prol-LEC	psph
psmc4.1	1.57431e-05	0.161711	0.991	0.984	0.397813	48h-prol-LEC	psmc4
txndc9	5.18215e-06	0.16159	0.82	0.717	0.130948	48h-prol-LEC	txndc9
psma6a.1	3.93497e-08	0.161446	0.882	0.763	0.000994327	48h-prol-LEC	psma6a
dbt.1	4.18107e-06	0.161377	0.814	0.705	0.105652	48h-prol-LEC	dbt
nipa2.1	1.04012e-08	0.160985	0.731	0.589	0.000262827	48h-prol-LEC	nipa2
anxa13l	1.58955e-06	0.160405	0.536	0.392	0.0401664	48h-prol-LEC	anxa13l
hnrnpul1.2	1.83991e-10	0.160072	0.854	0.727	4.64927e-06	48h-prol-LEC	hnrnpul1
atg3	2.42775e-05	0.159783	0.593	0.497	0.613467	48h-prol-LEC	atg3
mpc2.1	1.20565e-07	0.158841	0.738	0.595	0.00304656	48h-prol-LEC	mpc2
tor1	2.66295e-08	0.158688	0.902	0.82	0.0006729	48h-prol-LEC	tor1
necap2.1	1.06139e-11	0.158533	0.837	0.66	2.68203e-07	48h-prol-LEC	necap2
glo1	1.97948e-07	0.157665	0.865	0.773	0.00500196	48h-prol-LEC	glo1
naa15b.1	9.89832e-10	0.157566	0.643	0.479	2.50121e-05	48h-prol-LEC	naa15b
calr.2	3.53925e-05	0.157282	0.905	0.865	0.894334	48h-prol-LEC	calr
actr3.1	1.02261e-05	0.157242	0.921	0.846	0.258403	48h-prol-LEC	actr3
tars1.1	1.00268e-13	0.156862	0.894	0.806	2.53367e-09	48h-prol-LEC	tars1
ccn2a.1	1.26994e-09	0.156556	0.781	0.637	3.20902e-05	48h-prol-LEC	ccn2a
uqcrc1.1	8.41487e-07	0.156299	0.992	0.966	0.0212635	48h-prol-LEC	uqcrc1
snx4.1	1.35287e-05	0.15605	0.688	0.581	0.341857	48h-prol-LEC	snx4
nol9.1	2.15929e-07	0.156022	0.669	0.551	0.00545631	48h-prol-LEC	nol9
sae1.1	2.54634e-11	0.155488	0.854	0.752	6.43434e-07	48h-prol-LEC	sae1
srrm2	2.25122e-06	0.155124	0.719	0.606	0.0568862	48h-prol-LEC	srrm2
atf1	2.16152e-07	0.154586	0.899	0.788	0.00546195	48h-prol-LEC	atf1
nt5c2a.2	1.72402e-09	0.154377	0.551	0.392	4.35641e-05	48h-prol-LEC	nt5c2a
nolc1.2	1.00472e-15	0.154297	0.736	0.588	2.53883e-11	48h-prol-LEC	nolc1
slc11a2.1	1.18862e-09	0.154221	0.885	0.786	3.00353e-05	48h-prol-LEC	slc11a2
ackr3b.1	1.92922e-08	0.153724	0.96	0.894	0.000487496	48h-prol-LEC	ackr3b
aamp.1	5.47492e-14	0.153495	0.615	0.443	1.38346e-09	48h-prol-LEC	aamp
mboat7.1	1.96498e-08	0.153311	0.711	0.562	0.00049653	48h-prol-LEC	mboat7
atf5b.1	2.34157e-05	0.153306	0.562	0.462	0.591692	48h-prol-LEC	atf5b
aimp2.1	6.03682e-08	0.152759	0.755	0.67	0.00152544	48h-prol-LEC	aimp2
ier2b	5.27552e-06	0.152365	0.793	0.698	0.133307	48h-prol-LEC	ier2b
clasrp	2.73004e-10	0.151188	0.61	0.441	6.89853e-06	48h-prol-LEC	clasrp
psmd13.1	6.67819e-06	0.151122	0.978	0.935	0.168751	48h-prol-LEC	psmd13
vbp1.1	5.25573e-08	0.150211	0.62	0.48	0.00132807	48h-prol-LEC	vbp1
canx.2	1.02294e-06	0.149808	0.994	0.983	0.0258486	48h-prol-LEC	canx
b3galt2	1.16177e-07	0.149693	0.512	0.368	0.00293568	48h-prol-LEC	b3galt2
cdc37.1	8.90177e-08	0.149293	0.91	0.868	0.00224939	48h-prol-LEC	cdc37
xirp2a	1.53367e-08	0.148675	0.893	0.786	0.000387542	48h-prol-LEC	xirp2a
nup88.1	3.05965e-09	0.148378	0.77	0.629	7.73144e-05	48h-prol-LEC	nup88
tpd52l2b	2.12148e-05	0.148318	0.974	0.935	0.536077	48h-prol-LEC	tpd52l2b
ZNF276	1.21919e-07	0.148252	0.593	0.462	0.00308076	48h-prol-LEC	ZNF276
sgsh.1	9.41453e-15	0.148246	0.596	0.375	2.37896e-10	48h-prol-LEC	sgsh
babam1	1.16401e-06	0.147197	0.648	0.511	0.0294133	48h-prol-LEC	babam1
tbl1xr1a.1	5.93403e-07	0.146736	0.829	0.721	0.0149947	48h-prol-LEC	tbl1xr1a
api5.1	8.76799e-09	0.146511	0.927	0.86	0.000221558	48h-prol-LEC	api5
srsf1b	3.34496e-08	0.146473	0.641	0.501	0.000845238	48h-prol-LEC	srsf1b
ipo7.2	7.57755e-08	0.146394	0.978	0.952	0.00191477	48h-prol-LEC	ipo7
etv5b	3.79414e-05	0.146016	0.734	0.643	0.958742	48h-prol-LEC	etv5b
cdk9	1.07914e-07	0.145986	0.893	0.81	0.00272687	48h-prol-LEC	cdk9
cox15.1	1.56733e-07	0.145944	0.602	0.465	0.00396049	48h-prol-LEC	cox15
zgc:91910	1.50838e-05	0.145673	0.839	0.742	0.381152	48h-prol-LEC	zgc:91910
cry4.1	8.42108e-07	0.14491	0.725	0.606	0.0212792	48h-prol-LEC	cry4
h3f3d.1	1.53898e-07	0.144754	0.817	0.677	0.00388885	48h-prol-LEC	h3f3d
sec31b	6.6043e-06	0.143384	0.585	0.473	0.166884	48h-prol-LEC	sec31b
serpina10a.1	5.70831e-07	0.142696	0.598	0.46	0.0144243	48h-prol-LEC	serpina10a
kctd6b.1	1.0017e-05	0.141985	0.503	0.368	0.25312	48h-prol-LEC	kctd6b
seh1l.1	5.84212e-10	0.141879	0.84	0.732	1.47625e-05	48h-prol-LEC	seh1l
cmtm3.1	4.48743e-10	0.141143	0.8	0.661	1.13393e-05	48h-prol-LEC	cmtm3
srsf9.1	4.50961e-07	0.14097	0.772	0.661	0.0113953	48h-prol-LEC	srsf9
mthfd2.1	2.30207e-12	0.140666	0.671	0.527	5.81709e-08	48h-prol-LEC	mthfd2
ahsa1b	5.87431e-08	0.140646	0.742	0.647	0.00148438	48h-prol-LEC	ahsa1b
thoc2.1	1.21584e-08	0.1406	0.89	0.839	0.00030723	48h-prol-LEC	thoc2
mrps31	2.80181e-08	0.140189	0.534	0.399	0.000707989	48h-prol-LEC	mrps31
hnrnpa0a.1	1.61499e-06	0.140186	0.95	0.904	0.0408091	48h-prol-LEC	hnrnpa0a
rarga.2	2.61145e-05	0.140122	0.877	0.82	0.659888	48h-prol-LEC	rarga
dpf2l.1	2.90237e-06	0.139803	0.849	0.759	0.0733399	48h-prol-LEC	dpf2l
psma6b.1	2.65316e-06	0.13948	0.654	0.533	0.0670427	48h-prol-LEC	psma6b
ctr9.2	1.42138e-12	0.139307	0.843	0.703	3.59168e-08	48h-prol-LEC	ctr9
ppp3r1b	2.61093e-06	0.139176	0.825	0.721	0.0659755	48h-prol-LEC	ppp3r1b
dido1.1	7.13108e-07	0.138901	0.795	0.664	0.0180195	48h-prol-LEC	dido1
znf346.1	6.38785e-08	0.138835	0.814	0.752	0.00161415	48h-prol-LEC	znf346
ddx61.1	6.62064e-06	0.137581	0.925	0.864	0.167297	48h-prol-LEC	ddx61
ISCU.1	1.36891e-09	0.136767	0.649	0.47	3.45911e-05	48h-prol-LEC	ISCU
usp10.2	2.15378e-09	0.136737	0.957	0.902	5.44238e-05	48h-prol-LEC	usp10
pak4.1	1.5575e-06	0.136625	0.637	0.487	0.0393564	48h-prol-LEC	pak4
toporsb	2.56701e-05	0.135556	0.556	0.446	0.648657	48h-prol-LEC	toporsb
snip1	2.63779e-08	0.13432	0.666	0.518	0.000666542	48h-prol-LEC	snip1
znf706	6.69506e-06	0.134151	0.825	0.749	0.169178	48h-prol-LEC	znf706
ganab	1.2836e-07	0.134132	0.713	0.588	0.00324352	48h-prol-LEC	ganab
cops3.1	1.08778e-05	0.133867	0.635	0.507	0.274872	48h-prol-LEC	cops3
tbcb.1	3.73173e-11	0.133322	0.873	0.728	9.4297e-07	48h-prol-LEC	tbcb
pbx2	4.2876e-06	0.13332	0.727	0.616	0.108343	48h-prol-LEC	pbx2
ube2d2l.1	1.15027e-07	0.133266	0.62	0.493	0.00290661	48h-prol-LEC	ube2d2l
nsfl1c.1	5.73698e-06	0.133263	0.974	0.963	0.144968	48h-prol-LEC	nsfl1c
ccnt2b.1	1.83527e-08	0.132926	0.835	0.712	0.000463755	48h-prol-LEC	ccnt2b
bcap31.1	2.12864e-06	0.132659	0.778	0.65	0.0537886	48h-prol-LEC	bcap31
sumo1	1.69917e-05	0.132262	0.828	0.766	0.429364	48h-prol-LEC	sumo1
zgc:153990	9.20342e-06	0.13207	0.62	0.499	0.232561	48h-prol-LEC	zgc:153990
smarcb1a	4.82708e-07	0.131476	0.801	0.711	0.0121975	48h-prol-LEC	smarcb1a
clns1a	5.20246e-10	0.13087	0.852	0.727	1.31461e-05	48h-prol-LEC	clns1a
unc50	1.03211e-06	0.130779	0.578	0.429	0.0260803	48h-prol-LEC	unc50
si:ch211-197h24.6	1.06379e-06	0.130587	0.811	0.664	0.026881	48h-prol-LEC	si:ch211-197h24.6
akt2l	5.92947e-07	0.130195	0.624	0.497	0.0149832	48h-prol-LEC	akt2l
rnf185.1	6.99685e-09	0.130079	0.579	0.424	0.000176804	48h-prol-LEC	rnf185
selenon.1	2.78807e-09	0.129763	0.898	0.78	7.04518e-05	48h-prol-LEC	selenon
si:dkeyp-87e7.4.1	2.14374e-08	0.12962	0.657	0.52	0.000541702	48h-prol-LEC	si:dkeyp-87e7.4
luc7l	3.33724e-07	0.12929	0.887	0.78	0.00843287	48h-prol-LEC	luc7l
ppp1r10.1	3.09388e-06	0.129208	0.814	0.72	0.0781793	48h-prol-LEC	ppp1r10
ap2s1	4.16897e-07	0.129111	0.974	0.946	0.0105346	48h-prol-LEC	ap2s1
rap2c.1	3.62987e-05	0.128395	0.983	0.965	0.917231	48h-prol-LEC	rap2c
rap1ab.1	3.81691e-06	0.128354	0.537	0.411	0.0964495	48h-prol-LEC	rap1ab
timm23a.1	2.29029e-13	0.128221	0.668	0.465	5.78733e-09	48h-prol-LEC	timm23a
atp5mc3a.1	5.78932e-06	0.126534	0.97	0.935	0.14629	48h-prol-LEC	atp5mc3a
ppp6r3.1	3.88324e-08	0.125703	0.958	0.891	0.000981255	48h-prol-LEC	ppp6r3
si:ch211-210c8.7.1	9.39912e-07	0.12503	0.531	0.38	0.0237506	48h-prol-LEC	si:ch211-210c8.7
acaa2.1	2.98548e-05	0.122431	0.742	0.65	0.754401	48h-prol-LEC	acaa2
cnot11.1	2.83816e-07	0.122333	0.781	0.674	0.00717174	48h-prol-LEC	cnot11
slc30a9.1	3.12082e-07	0.12167	0.582	0.436	0.007886	48h-prol-LEC	slc30a9
tox4a.1	1.02496e-06	0.121659	0.571	0.424	0.0258998	48h-prol-LEC	tox4a
zgc:56525.1	1.83954e-05	0.12145	0.905	0.843	0.464833	48h-prol-LEC	zgc:56525
sdr16c5b.1	3.95368e-07	0.121376	0.807	0.663	0.00999056	48h-prol-LEC	sdr16c5b
praf2	1.8151e-06	0.120599	0.606	0.473	0.0458658	48h-prol-LEC	praf2
sars1.1	1.10273e-13	0.120553	0.929	0.829	2.78648e-09	48h-prol-LEC	sars1
u2af2b.1	1.31702e-05	0.12031	0.922	0.864	0.332798	48h-prol-LEC	u2af2b
dlat.1	9.93462e-08	0.120236	0.851	0.785	0.00251038	48h-prol-LEC	dlat
elof1.1	9.47874e-07	0.120056	0.714	0.584	0.0239518	48h-prol-LEC	elof1
2024-09-15	8.10392e-06	0.12005	0.876	0.8	0.204778	48h-prol-LEC	2024-09-15
arid1b.1	8.71887e-08	0.119574	0.534	0.39	0.00220317	48h-prol-LEC	arid1b
crebzf.1	1.16837e-08	0.119568	0.902	0.759	0.000295236	48h-prol-LEC	crebzf
nomo.1	1.83004e-08	0.119444	0.859	0.786	0.000462434	48h-prol-LEC	nomo
epn1.2	1.71558e-09	0.118563	0.769	0.618	4.3351e-05	48h-prol-LEC	epn1
ciapin1.2	1.00805e-09	0.118013	0.753	0.619	2.54724e-05	48h-prol-LEC	ciapin1
wdr45b.1	4.85016e-06	0.117594	0.615	0.493	0.122559	48h-prol-LEC	wdr45b
foxn2b.1	2.98104e-07	0.117031	0.561	0.416	0.00753279	48h-prol-LEC	foxn2b
snw1	1.4945e-08	0.116946	0.967	0.95	0.000377646	48h-prol-LEC	snw1
ap1b1.2	2.13993e-06	0.116831	0.992	0.963	0.0540739	48h-prol-LEC	ap1b1
sf3a2.1	5.55838e-08	0.116065	0.795	0.677	0.00140455	48h-prol-LEC	sf3a2
lars1b.2	8.67675e-07	0.115861	0.598	0.484	0.0219253	48h-prol-LEC	lars1b
ormdl1.1	9.01915e-09	0.115247	0.651	0.483	0.000227905	48h-prol-LEC	ormdl1
usf1l.1	4.29579e-08	0.114544	0.705	0.548	0.0010855	48h-prol-LEC	usf1l
glrx3.1	3.09938e-06	0.114257	0.669	0.541	0.0783182	48h-prol-LEC	glrx3
mtfr1l.1	1.16868e-07	0.11369	0.766	0.626	0.00295314	48h-prol-LEC	mtfr1l
tssc4.1	1.57152e-09	0.113542	0.693	0.54	3.97108e-05	48h-prol-LEC	tssc4
strap.1	7.65793e-08	0.113215	0.842	0.707	0.00193508	48h-prol-LEC	strap
immt.2	6.78519e-12	0.113123	0.935	0.816	1.71455e-07	48h-prol-LEC	immt
gpx4a.1	3.8759e-05	0.112318	0.537	0.404	0.979401	48h-prol-LEC	gpx4a
pik3r1.1	8.10275e-06	0.112161	0.811	0.722	0.204748	48h-prol-LEC	pik3r1
rtn4a.1	2.19826e-05	0.111841	0.975	0.933	0.555479	48h-prol-LEC	rtn4a
tcea1.1	4.81124e-10	0.111543	0.772	0.642	1.21575e-05	48h-prol-LEC	tcea1
trappc13.1	1.73989e-06	0.110439	0.601	0.475	0.0439654	48h-prol-LEC	trappc13
eci2.1	1.54876e-06	0.110233	0.616	0.475	0.0391356	48h-prol-LEC	eci2
uspl1	5.44717e-09	0.109475	0.514	0.358	0.000137644	48h-prol-LEC	uspl1
tspo.1	5.48997e-14	0.109183	0.668	0.487	1.38726e-09	48h-prol-LEC	tspo
akap1b.1	1.45716e-09	0.108894	0.63	0.463	3.6821e-05	48h-prol-LEC	akap1b
impa1	5.75953e-07	0.108668	0.581	0.435	0.0145538	48h-prol-LEC	impa1
TST	4.61494e-08	0.107763	0.553	0.399	0.00116615	48h-prol-LEC	TST
smad6a	8.52707e-06	0.106365	0.812	0.751	0.215471	48h-prol-LEC	smad6a
mrpl39.1	1.86337e-08	0.105344	0.621	0.475	0.000470854	48h-prol-LEC	mrpl39
atrxl.1	1.92683e-07	0.105217	0.616	0.48	0.00486889	48h-prol-LEC	atrxl
eif2b2.1	1.68512e-06	0.104643	0.648	0.527	0.0425812	48h-prol-LEC	eif2b2
si:dkeyp-121d4.3	3.0506e-05	0.10455	0.575	0.452	0.770857	48h-prol-LEC	si:dkeyp-121d4.3
pelp1.1	1.23809e-10	0.10442	0.699	0.579	3.12854e-06	48h-prol-LEC	pelp1
bcl7bb	7.46413e-08	0.104366	0.643	0.476	0.00188611	48h-prol-LEC	bcl7bb
rab40c.1	5.30554e-07	0.104238	0.829	0.715	0.0134066	48h-prol-LEC	rab40c
ppp1r15a	4.9197e-08	0.104233	0.556	0.398	0.00124316	48h-prol-LEC	ppp1r15a
pccb	4.86265e-09	0.104086	0.733	0.602	0.000122874	48h-prol-LEC	pccb
thoc1	1.18073e-07	0.103937	0.843	0.755	0.0029836	48h-prol-LEC	thoc1
hdac8	1.00214e-08	0.103846	0.545	0.374	0.000253231	48h-prol-LEC	hdac8
itm2bb	6.13075e-06	0.103633	0.82	0.711	0.154918	48h-prol-LEC	itm2bb
usp14.1	4.72901e-08	0.1033	0.911	0.844	0.00119497	48h-prol-LEC	usp14
txnl1.1	4.04436e-07	0.101859	0.957	0.897	0.0102197	48h-prol-LEC	txnl1
me3.1	1.01954e-06	0.101845	0.936	0.88	0.0257628	48h-prol-LEC	me3
irf2bp2b.1	5.77193e-11	0.101815	0.943	0.868	1.45851e-06	48h-prol-LEC	irf2bp2b
PRRC2B.1	1.62961e-05	0.100305	0.714	0.574	0.411785	48h-prol-LEC	PRRC2B
nob1.1	6.20169e-10	0.100198	0.575	0.433	1.56711e-05	48h-prol-LEC	nob1
laptm4b.1	3.68847e-05	0.100021	0.674	0.54	0.932039	48h-prol-LEC	laptm4b
mogs.2	1.03671e-05	-0.100913	0.75	0.671	0.261967	48h-prol-LEC	mogs
mgat2	3.7197e-06	-0.102691	0.669	0.531	0.093993	48h-prol-LEC	mgat2
srp19.1	9.37226e-08	-0.103951	0.502	0.343	0.00236828	48h-prol-LEC	srp19
smad6b.2	1.0291e-07	-0.104163	0.781	0.684	0.00260044	48h-prol-LEC	smad6b
ap1m1.1	2.45311e-06	-0.10525	0.814	0.712	0.0619876	48h-prol-LEC	ap1m1
stk11	9.75328e-09	-0.107207	0.755	0.623	0.000246456	48h-prol-LEC	stk11
march5l.1	2.9044e-11	-0.107277	0.609	0.425	7.33913e-07	48h-prol-LEC	march5l
cops5.1	4.83892e-08	-0.107916	0.728	0.575	0.00122275	48h-prol-LEC	cops5
slc7a6os.1	2.11343e-06	-0.108375	0.648	0.521	0.0534042	48h-prol-LEC	slc7a6os
cdh2.1	3.65579e-08	-0.108878	0.62	0.476	0.000923782	48h-prol-LEC	cdh2
rabep1	2.12443e-06	-0.109455	0.511	0.375	0.0536821	48h-prol-LEC	rabep1
psmc1b.1	2.36865e-05	-0.111125	0.901	0.819	0.598534	48h-prol-LEC	psmc1b
cyb5r1	2.79352e-06	-0.113894	0.675	0.517	0.0705895	48h-prol-LEC	cyb5r1
sucla2.1	1.80777e-07	-0.113989	0.939	0.863	0.00456806	48h-prol-LEC	sucla2
atp6v0b	1.38712e-05	-0.114934	0.769	0.65	0.35051	48h-prol-LEC	atp6v0b
snx14	1.44281e-05	-0.117099	0.764	0.644	0.364584	48h-prol-LEC	snx14
arfgap2.1	2.94446e-05	-0.117101	0.606	0.473	0.744035	48h-prol-LEC	arfgap2
mtmr6.1	7.32229e-06	-0.117881	0.624	0.52	0.185027	48h-prol-LEC	mtmr6
nsd1a	2.60287e-05	-0.117959	0.806	0.684	0.65772	48h-prol-LEC	nsd1a
acadl.1	3.34317e-08	-0.118459	0.61	0.472	0.000844785	48h-prol-LEC	acadl
spag7.1	1.67249e-07	-0.118635	0.554	0.404	0.00422622	48h-prol-LEC	spag7
zfhx3.1	3.69486e-05	-0.118979	0.66	0.568	0.933653	48h-prol-LEC	zfhx3
aida	1.05548e-06	-0.119665	0.66	0.517	0.026671	48h-prol-LEC	aida
caprin1a	4.3815e-06	-0.119715	0.876	0.8	0.110716	48h-prol-LEC	caprin1a
socs6b.1	6.62228e-06	-0.121189	0.648	0.545	0.167338	48h-prol-LEC	socs6b
bod1	1.9053e-06	-0.121644	0.55	0.398	0.0481451	48h-prol-LEC	bod1
tab2	1.79187e-06	-0.121989	0.784	0.659	0.0452788	48h-prol-LEC	tab2
map1sa.1	5.42696e-06	-0.122036	0.634	0.494	0.137134	48h-prol-LEC	map1sa
qpctla.1	6.69918e-08	-0.124643	0.651	0.528	0.00169282	48h-prol-LEC	qpctla
rnf38.1	1.20203e-06	-0.124843	0.686	0.545	0.0303741	48h-prol-LEC	rnf38
alg9	2.16531e-05	-0.126012	0.7	0.627	0.547153	48h-prol-LEC	alg9
cdc5l.1	9.79944e-09	-0.130279	0.88	0.768	0.000247622	48h-prol-LEC	cdc5l
spns1	3.38702e-09	-0.131685	0.859	0.741	8.55867e-05	48h-prol-LEC	spns1
hccsb.2	9.83942e-07	-0.131733	0.578	0.433	0.0248632	48h-prol-LEC	hccsb
hmgcrb	5.86048e-07	-0.132177	0.814	0.711	0.0148088	48h-prol-LEC	hmgcrb
cry2	3.55333e-06	-0.132573	0.679	0.554	0.0897892	48h-prol-LEC	cry2
ccdc93.1	3.9065e-05	-0.134202	0.675	0.574	0.987133	48h-prol-LEC	ccdc93
chm	9.92547e-06	-0.134368	0.705	0.601	0.250807	48h-prol-LEC	chm
ckbb.1	1.11238e-06	-0.135734	0.644	0.537	0.0281087	48h-prol-LEC	ckbb
ugp2b.1	2.32769e-05	-0.137315	0.548	0.443	0.588183	48h-prol-LEC	ugp2b
pgd.1	2.13296e-05	-0.138539	0.938	0.891	0.538978	48h-prol-LEC	pgd
si:ch73-199g24.2	1.43855e-05	-0.138737	0.578	0.448	0.363507	48h-prol-LEC	si:ch73-199g24.2
atp6v0d1.1	6.88546e-06	-0.139518	0.689	0.564	0.173989	48h-prol-LEC	atp6v0d1
kdm6bb.1	6.58293e-09	-0.143331	0.837	0.734	0.000166344	48h-prol-LEC	kdm6bb
sbno2a	5.68397e-06	-0.143612	0.533	0.394	0.143628	48h-prol-LEC	sbno2a
dcun1d1	9.70538e-06	-0.145731	0.582	0.439	0.245245	48h-prol-LEC	dcun1d1
lysmd2.1	2.80954e-07	-0.146305	0.62	0.456	0.00709943	48h-prol-LEC	lysmd2
map2.1	5.33602e-06	-0.148118	0.582	0.463	0.134836	48h-prol-LEC	map2
foxj2	5.91313e-06	-0.148622	0.562	0.424	0.149419	48h-prol-LEC	foxj2
selenoj.1	7.17123e-06	-0.149134	0.63	0.492	0.18121	48h-prol-LEC	selenoj
zgc:66474.1	4.88509e-06	-0.149236	0.516	0.381	0.123441	48h-prol-LEC	zgc:66474
uxs1	6.28052e-06	-0.151617	0.724	0.582	0.158703	48h-prol-LEC	uxs1
raraa.1	2.38897e-05	-0.152058	0.68	0.552	0.60367	48h-prol-LEC	raraa
ptpn2b.1	3.48245e-06	-0.15262	0.565	0.426	0.0879979	48h-prol-LEC	ptpn2b
purba	3.1602e-06	-0.152791	0.564	0.402	0.0798551	48h-prol-LEC	purba
nnt.1	1.13167e-05	-0.153039	0.977	0.945	0.28596	48h-prol-LEC	nnt
selenow2a.1	3.87135e-06	-0.153135	0.699	0.565	0.0978252	48h-prol-LEC	selenow2a
ppp1r13bb	3.32169e-05	-0.153704	0.811	0.72	0.839359	48h-prol-LEC	ppp1r13bb
pwwp2a.1	2.75056e-09	-0.154007	0.598	0.416	6.95039e-05	48h-prol-LEC	pwwp2a
eps15l1a	3.75358e-05	-0.154526	0.655	0.535	0.948493	48h-prol-LEC	eps15l1a
hiat1a	1.25347e-05	-0.155111	0.592	0.47	0.316739	48h-prol-LEC	hiat1a
impdh1b	9.12595e-06	-0.155936	0.671	0.578	0.230604	48h-prol-LEC	impdh1b
znf281b.1	7.97347e-06	-0.157786	0.592	0.445	0.201482	48h-prol-LEC	znf281b
zgc:153115.1	6.12697e-08	-0.158716	0.921	0.827	0.00154823	48h-prol-LEC	zgc:153115
trrap.1	1.36648e-05	-0.161086	0.511	0.391	0.345296	48h-prol-LEC	trrap
prickle1b.1	9.68936e-08	-0.161483	0.702	0.593	0.0024484	48h-prol-LEC	prickle1b
cpdp.1	2.96616e-06	-0.162293	0.784	0.671	0.074952	48h-prol-LEC	cpdp
eprs1.1	3.5519e-08	-0.164548	0.745	0.635	0.000897529	48h-prol-LEC	eprs1
arrb2a	1.88093e-10	-0.1651	0.505	0.329	4.75292e-06	48h-prol-LEC	arrb2a
hadhab.1	1.29853e-05	-0.166186	0.885	0.816	0.328124	48h-prol-LEC	hadhab
arglu1b	4.67766e-06	-0.16668	0.627	0.508	0.1182	48h-prol-LEC	arglu1b
rybpb	5.20145e-06	-0.166713	0.607	0.479	0.131435	48h-prol-LEC	rybpb
zbtb2b	6.62014e-06	-0.166963	0.893	0.834	0.167284	48h-prol-LEC	zbtb2b
rnf20.1	1.27967e-10	-0.167111	0.8	0.653	3.2336e-06	48h-prol-LEC	rnf20
pggt1b.1	1.36032e-05	-0.167222	0.702	0.591	0.343739	48h-prol-LEC	pggt1b
CAPN1	1.00852e-09	-0.16976	0.648	0.499	2.54842e-05	48h-prol-LEC	CAPN1
bsdc1	5.47908e-06	-0.170283	0.84	0.765	0.138451	48h-prol-LEC	bsdc1
timp2a	3.73109e-07	-0.171487	0.916	0.831	0.0094281	48h-prol-LEC	timp2a
letm2.1	3.15988e-05	-0.1754	0.817	0.715	0.79847	48h-prol-LEC	letm2
cherp.1	8.4776e-07	-0.176105	0.832	0.727	0.021422	48h-prol-LEC	cherp
setd2	5.19143e-08	-0.179035	0.613	0.448	0.00131182	48h-prol-LEC	setd2
glud1b.1	1.60279e-05	-0.180023	0.904	0.853	0.405008	48h-prol-LEC	glud1b
pam.1	5.11554e-06	-0.181417	0.835	0.735	0.129265	48h-prol-LEC	pam
nol11.2	4.2439e-10	-0.182768	0.717	0.576	1.07239e-05	48h-prol-LEC	nol11
ap3m1	3.44317e-06	-0.188125	0.607	0.456	0.0870056	48h-prol-LEC	ap3m1
aclya	1.16056e-06	-0.188152	0.679	0.54	0.0293262	48h-prol-LEC	aclya
txlna	2.68637e-05	-0.188227	0.708	0.585	0.678818	48h-prol-LEC	txlna
commd2.1	3.95992e-06	-0.1916	0.562	0.414	0.100063	48h-prol-LEC	commd2
etfdh	2.00035e-06	-0.196569	0.863	0.772	0.0505467	48h-prol-LEC	etfdh
mrpl37.2	2.07081e-05	-0.197557	0.637	0.535	0.523272	48h-prol-LEC	mrpl37
wdr37.1	2.09203e-06	-0.197892	0.576	0.441	0.0528636	48h-prol-LEC	wdr37
rab14l	1.33616e-05	-0.199066	0.672	0.54	0.337635	48h-prol-LEC	rab14l
aspscr1	1.66376e-05	-0.199702	0.657	0.569	0.420416	48h-prol-LEC	aspscr1
dcaf5.1	1.40643e-08	-0.200148	0.543	0.368	0.00035539	48h-prol-LEC	dcaf5
zgc:153993.1	2.36343e-06	-0.201377	0.657	0.51	0.0597214	48h-prol-LEC	zgc:153993
wdfy1.1	1.27041e-05	-0.201378	0.713	0.558	0.321021	48h-prol-LEC	wdfy1
keap1b.1	1.51466e-11	-0.202296	0.764	0.625	3.8274e-07	48h-prol-LEC	keap1b
arl8ba.1	1.02811e-06	-0.203355	0.607	0.465	0.0259792	48h-prol-LEC	arl8ba
SPEN.1	1.92724e-06	-0.206761	0.669	0.55	0.0486994	48h-prol-LEC	SPEN
LO017877.2.1	3.25073e-07	-0.210829	0.975	0.992	0.00821426	48h-prol-LEC	LO017877.2
ankhd1.1	4.00964e-11	-0.211093	0.772	0.599	1.0132e-06	48h-prol-LEC	ankhd1
ska2	2.15608e-05	-0.211486	0.53	0.404	0.544819	48h-prol-LEC	ska2
rtn4b	4.81765e-08	-0.21576	0.697	0.545	0.00121737	48h-prol-LEC	rtn4b
ncoa6	9.5276e-08	-0.218427	0.679	0.548	0.00240753	48h-prol-LEC	ncoa6
rps19bp1	6.53588e-06	-0.219453	0.511	0.381	0.165155	48h-prol-LEC	rps19bp1
prrc2c.1	6.49685e-06	-0.221151	0.696	0.571	0.164169	48h-prol-LEC	prrc2c
eif2b5.1	3.06366e-07	-0.222117	0.665	0.548	0.00774157	48h-prol-LEC	eif2b5
si:ch211-140m22.7.2	1.41306e-05	-0.224885	0.556	0.424	0.357066	48h-prol-LEC	si:ch211-140m22.7
fli1a.1	2.19856e-06	-0.225193	1	1	0.0555554	48h-prol-LEC	fli1a
parn.1	1.13323e-06	-0.22558	0.846	0.688	0.0286356	48h-prol-LEC	parn
ctdsp1.1	8.74e-07	-0.227208	0.78	0.643	0.0220851	48h-prol-LEC	ctdsp1
kmt5aa.1	7.05432e-08	-0.227404	0.79	0.674	0.00178256	48h-prol-LEC	kmt5aa
itgb5.1	8.94516e-06	-0.22922	0.79	0.724	0.226035	48h-prol-LEC	itgb5
sestd1.1	1.78536e-05	-0.233634	0.575	0.446	0.451143	48h-prol-LEC	sestd1
sbno1.1	5.27927e-11	-0.234515	0.703	0.561	1.33402e-06	48h-prol-LEC	sbno1
mios	1.88618e-05	-0.235193	0.54	0.416	0.476618	48h-prol-LEC	mios
tmtc3	9.63696e-07	-0.237131	0.505	0.353	0.0243516	48h-prol-LEC	tmtc3
cebpg	2.99952e-05	-0.239741	0.644	0.538	0.757949	48h-prol-LEC	cebpg
CT956002.2.1	1.172e-06	-0.244403	0.902	0.949	0.0296153	48h-prol-LEC	CT956002.2
creb3l2	2.25299e-05	-0.24717	0.828	0.749	0.569308	48h-prol-LEC	creb3l2
faf1	1.65386e-05	-0.247265	0.71	0.574	0.417915	48h-prol-LEC	faf1
ireb2.1	4.00949e-07	-0.247324	0.536	0.397	0.0101316	48h-prol-LEC	ireb2
gpr107	1.96283e-07	-0.249028	0.685	0.535	0.00495987	48h-prol-LEC	gpr107
eif3c.1	2.66869e-06	-0.24942	0.927	0.874	0.0674352	48h-prol-LEC	eif3c
nploc4.1	1.24176e-07	-0.249812	0.747	0.618	0.00313781	48h-prol-LEC	nploc4
tsr1.1	2.12717e-07	-0.252114	0.783	0.671	0.00537515	48h-prol-LEC	tsr1
zp3e.1	1.15988e-05	-0.252349	0.874	0.928	0.293091	48h-prol-LEC	zp3e
si:ch211-225b11.1	7.55207e-08	-0.254458	0.682	0.518	0.00190833	48h-prol-LEC	si:ch211-225b11.1
zdhhc13	2.95142e-05	-0.255546	0.705	0.585	0.745794	48h-prol-LEC	zdhhc13
mbd1b	4.9321e-06	-0.257741	0.559	0.424	0.124629	48h-prol-LEC	mbd1b
ano10a	1.97065e-06	-0.257843	0.766	0.635	0.0497962	48h-prol-LEC	ano10a
eif4eb.1	2.60958e-05	-0.262519	0.626	0.51	0.659416	48h-prol-LEC	eif4eb
plaa.1	7.07654e-06	-0.263145	0.719	0.627	0.178817	48h-prol-LEC	plaa
cmasa.1	1.60091e-05	-0.265032	0.668	0.544	0.404533	48h-prol-LEC	cmasa
cbx6a	4.27994e-06	-0.265253	0.646	0.506	0.10815	48h-prol-LEC	cbx6a
dnm2a.1	4.93974e-07	-0.267529	0.64	0.466	0.0124822	48h-prol-LEC	dnm2a
unc5c	8.49168e-08	-0.267639	0.553	0.415	0.00214576	48h-prol-LEC	unc5c
rnf111	1.99581e-05	-0.272079	0.781	0.69	0.504321	48h-prol-LEC	rnf111
si:ch211-183d21.1.1	2.0939e-05	-0.274482	0.637	0.544	0.529108	48h-prol-LEC	si:ch211-183d21.1
stk35l.1	2.94633e-05	-0.274854	0.707	0.589	0.744509	48h-prol-LEC	stk35l
NFX1.1	1.56624e-05	-0.275096	0.719	0.633	0.395772	48h-prol-LEC	NFX1
herc1	1.24706e-08	-0.277777	0.568	0.397	0.000315119	48h-prol-LEC	herc1
colec12.1	5.91041e-09	-0.279112	0.807	0.705	0.00014935	48h-prol-LEC	colec12
dip2ba.1	1.04026e-05	-0.281846	0.734	0.615	0.262862	48h-prol-LEC	dip2ba
xpo6.1	5.97727e-09	-0.282888	0.776	0.633	0.00015104	48h-prol-LEC	xpo6
gps2	1.81486e-05	-0.290513	0.682	0.558	0.458597	48h-prol-LEC	gps2
hmcn1.1	6.13648e-09	-0.292284	0.531	0.38	0.000155063	48h-prol-LEC	hmcn1
zfand2a	1.5834e-05	-0.296157	0.627	0.489	0.400109	48h-prol-LEC	zfand2a
erlec1	2.17421e-05	-0.296983	0.78	0.646	0.549402	48h-prol-LEC	erlec1
trap1.1	1.44323e-06	-0.297129	0.693	0.574	0.036469	48h-prol-LEC	trap1
btaf1	1.77428e-05	-0.304619	0.634	0.5	0.448342	48h-prol-LEC	btaf1
mdm2.1	8.47373e-07	-0.305273	0.571	0.425	0.0214123	48h-prol-LEC	mdm2
larp6a.1	6.48266e-06	-0.309513	0.804	0.686	0.16381	48h-prol-LEC	larp6a
usp33	5.15524e-06	-0.310712	0.689	0.55	0.130268	48h-prol-LEC	usp33
CABZ01046949.1	2.13467e-05	-0.314109	0.615	0.703	0.539411	48h-prol-LEC	CABZ01046949.1
xab2	7.23099e-07	-0.315717	0.663	0.544	0.018272	48h-prol-LEC	xab2
aldh16a1	2.84763e-07	-0.317381	0.536	0.405	0.00719569	48h-prol-LEC	aldh16a1
slc25a12.1	1.10634e-07	-0.317831	0.725	0.576	0.0027956	48h-prol-LEC	slc25a12
ogt.1	2.81357e-06	-0.320665	0.772	0.63	0.0710962	48h-prol-LEC	ogt.1
fntb.1	5.80147e-08	-0.327079	0.537	0.37	0.00146597	48h-prol-LEC	fntb
tram1.1	1.68619e-05	-0.327094	0.854	0.783	0.426083	48h-prol-LEC	tram1
gmds.1	2.90709e-06	-0.329555	0.579	0.448	0.0734592	48h-prol-LEC	gmds
slc25a39.1	1.57886e-06	-0.334175	0.634	0.484	0.0398962	48h-prol-LEC	slc25a39
actb2.1	3.43515e-20	-0.340587	1	1	8.68027e-16	48h-prol-LEC	actb2
atp6v0a1a	1.09295e-05	-0.346734	0.849	0.755	0.276178	48h-prol-LEC	atp6v0a1a
zfx	6.88488e-08	-0.353024	0.598	0.443	0.00173974	48h-prol-LEC	zfx
sdf4.1	1.54413e-05	-0.361654	0.767	0.678	0.390187	48h-prol-LEC	sdf4
maff.1	1.1305e-10	-0.371914	0.624	0.463	2.85666e-06	48h-prol-LEC	maff
gigyf1b.1	2.27305e-06	-0.373495	0.516	0.377	0.0574378	48h-prol-LEC	gigyf1b
C2H7orf25.1	1.47725e-05	-0.375696	0.559	0.429	0.373286	48h-prol-LEC	C2H7orf25
traf6.1	2.49851e-07	-0.3821	0.643	0.494	0.00631349	48h-prol-LEC	traf6
tfdp2	2.89913e-07	-0.384588	0.564	0.415	0.00732581	48h-prol-LEC	tfdp2
strada.1	2.75398e-07	-0.391703	0.691	0.554	0.00695904	48h-prol-LEC	strada
alas1	2.31532e-05	-0.401033	0.857	0.79	0.585059	48h-prol-LEC	alas1
flot1a	3.75519e-05	-0.402802	0.564	0.425	0.9489	48h-prol-LEC	flot1a
dnajc3b	1.00506e-06	-0.404197	0.599	0.483	0.0253967	48h-prol-LEC	dnajc3b
crlf3	1.07674e-06	-0.404863	0.778	0.656	0.0272081	48h-prol-LEC	crlf3
gclc.1	2.334e-10	-0.414968	0.73	0.589	5.89778e-06	48h-prol-LEC	gclc
krt18a.1.1	8.15943e-12	-0.416272	1	1	2.06181e-07	48h-prol-LEC	krt18a.1
ushbp1.1	1.91082e-06	-0.420202	0.992	0.994	0.0482845	48h-prol-LEC	ushbp1
ints13	2.25456e-05	-0.426537	0.613	0.493	0.569705	48h-prol-LEC	ints13
lsg1.1	2.21833e-07	-0.437043	0.629	0.467	0.00560551	48h-prol-LEC	lsg1
ncalda.1	4.13312e-07	-0.44102	0.998	1	0.010444	48h-prol-LEC	ncalda
mmp14a.1	1.94089e-07	-0.442662	0.509	0.409	0.00490444	48h-prol-LEC	mmp14a
gfm1.1	2.53051e-06	-0.449148	0.509	0.387	0.0639434	48h-prol-LEC	gfm1
tspan4b.1	1.35427e-05	-0.450781	0.997	0.993	0.34221	48h-prol-LEC	tspan4b
krt8.2	4.21536e-17	-0.452558	1	1	1.06518e-12	48h-prol-LEC	krt8
wasf3b.2	9.05934e-09	-0.465315	1	1	0.00022892	48h-prol-LEC	wasf3b
ercc2	1.17378e-05	-0.467402	0.522	0.384	0.296602	48h-prol-LEC	ercc2
gcn1	4.23916e-08	-0.468776	0.72	0.588	0.00107119	48h-prol-LEC	gcn1
pik3r6a.2	6.85062e-07	-0.483278	0.781	0.669	0.0173108	48h-prol-LEC	pik3r6a
fbxo9	5.44385e-08	-0.490139	0.525	0.36	0.00137561	48h-prol-LEC	fbxo9
abcb7.1	1.98559e-05	-0.498313	0.624	0.527	0.501738	48h-prol-LEC	abcb7
tmsb4x.1	2.58892e-32	-0.513515	1	1	6.54195e-28	48h-prol-LEC	tmsb4x
gnai2a.2	1.03034e-08	-0.51807	1	1	0.000260357	48h-prol-LEC	gnai2a
histh1l.1	3.82326e-06	-0.51987	1	1	0.0966101	48h-prol-LEC	histh1l
nae1.1	1.35832e-05	-0.521404	0.77	0.652	0.343235	48h-prol-LEC	nae1
ccdc9	2.76937e-05	-0.529106	0.517	0.371	0.699792	48h-prol-LEC	ccdc9
cdh5.2	1.05076e-13	-0.53467	1	1	2.65516e-09	48h-prol-LEC	cdh5
il17rd.1	7.34385e-09	-0.535172	0.55	0.404	0.000185572	48h-prol-LEC	il17rd
si:ch211-156j16.1.2	1.57018e-16	-0.549606	1	1	3.9677e-12	48h-prol-LEC	si:ch211-156j16.1
golga5.1	7.43347e-12	-0.55263	0.568	0.378	1.87836e-07	48h-prol-LEC	golga5
arhgap29a.1	6.45143e-07	-0.554306	0.792	0.826	0.0163021	48h-prol-LEC	arhgap29a
aldh1l1	2.27051e-05	-0.556672	0.511	0.388	0.573736	48h-prol-LEC	aldh1l1
plekhg5a.1	1.45157e-05	-0.566246	0.998	0.994	0.366797	48h-prol-LEC	plekhg5a
akap12b.1	8.05654e-07	-0.566536	1	1	0.0203581	48h-prol-LEC	akap12b
galnt2.1	6.63453e-06	-0.567429	0.573	0.476	0.167648	48h-prol-LEC	galnt2
pecam1.1	2.13568e-18	-0.571086	1	1	5.39665e-14	48h-prol-LEC	pecam1
me2.1	1.41413e-05	-0.575243	0.624	0.521	0.357337	48h-prol-LEC	me2
ywhabl.2	2.26919e-11	-0.580197	1	1	5.73401e-07	48h-prol-LEC	ywhabl
jam2a.2	1.65804e-09	-0.605906	0.998	0.996	4.18971e-05	48h-prol-LEC	jam2a
adipor1b	3.49083e-05	-0.610253	0.502	0.374	0.882097	48h-prol-LEC	adipor1b
fscn1a.1	2.4713e-07	-0.61455	0.998	1	0.00624474	48h-prol-LEC	fscn1a
sox18.2	1.62761e-07	-0.617819	0.998	0.996	0.00411281	48h-prol-LEC	sox18
anxa11b.1	9.75417e-07	-0.624286	1	1	0.0246478	48h-prol-LEC	anxa11b
sat1a.2	2.05048e-06	-0.641628	0.984	0.986	0.0518136	48h-prol-LEC	sat1a.2
mcamb.2	2.20902e-07	-0.661996	1	0.997	0.00558198	48h-prol-LEC	mcamb
afap1l1b.2	4.33633e-07	-0.663251	0.998	0.993	0.0109575	48h-prol-LEC	afap1l1b
anxa13.1	7.62638e-07	-0.684868	0.989	0.982	0.0192711	48h-prol-LEC	anxa13
bcl2l10	1.3843e-08	-0.686724	0.54	0.368	0.000349798	48h-prol-LEC	bcl2l10
cldn5b.2	6.20796e-09	-0.695998	1	1	0.000156869	48h-prol-LEC	cldn5b
vat1.2	5.94385e-06	-0.718804	1	0.996	0.150195	48h-prol-LEC	vat1
cnn3a.1	2.70918e-09	-0.720334	0.994	0.99	6.84584e-05	48h-prol-LEC	cnn3a
acsl4a.1	3.43987e-06	-0.726669	0.561	0.411	0.086922	48h-prol-LEC	acsl4a
robo4.2	6.58043e-10	-0.731847	1	1	1.66281e-05	48h-prol-LEC	robo4
hif1ab.1	2.13016e-05	-0.741553	0.998	0.989	0.53827	48h-prol-LEC	hif1ab
perp.2	3.93765e-07	-0.761549	0.994	0.996	0.00995005	48h-prol-LEC	perp
tspan14.1	9.83949e-13	-0.765483	1	0.996	2.48634e-08	48h-prol-LEC	tspan14
podxl.2	1.22583e-15	-0.785118	0.998	1	3.09754e-11	48h-prol-LEC	podxl
sptbn1.1	1.31213e-08	-0.793683	0.969	0.977	0.000331561	48h-prol-LEC	sptbn1
hlx1.2	2.64718e-10	-0.80514	0.997	0.994	6.68915e-06	48h-prol-LEC	hlx1
[truncated: 76 more rows]

## Sheet: DEG_7dpf_prolLEC
7 dpf prol LEC	p_val	avg_log2FC	pct.1	pct.2	p_val_adj	cluster	gene
mcm6.2	3.51493e-12	3.03057	0.753	0.489	8.88189e-08	7d-prol-LEC	mcm6
orc4.1	8.1677e-09	2.41215	0.531	0.273	0.00020639	7d-prol-LEC	orc4
cdca7a.2	1.10701e-05	2.16226	0.63	0.46	0.27973	7d-prol-LEC	cdca7a
rfc4.1	2.30637e-05	2.11035	0.519	0.352	0.582796	7d-prol-LEC	rfc4
nasp.2	4.13048e-06	1.89682	0.667	0.509	0.104373	7d-prol-LEC	nasp
mcm2.2	2.003e-06	1.87008	0.753	0.614	0.0506139	7d-prol-LEC	mcm2
chaf1a.1	2.36211e-06	1.82979	0.568	0.362	0.0596882	7d-prol-LEC	chaf1a
mcm5.2	1.70742e-10	1.7693	0.778	0.54	4.31447e-06	7d-prol-LEC	mcm5
fen1.2	2.16706e-10	1.76369	0.63	0.378	5.47593e-06	7d-prol-LEC	fen1
si:ch211-122f10.4.1	1.14289e-05	1.7467	0.556	0.339	0.288796	7d-prol-LEC	si:ch211-122f10.4
pcna.2	9.41413e-12	1.73685	0.901	0.735	2.37886e-07	7d-prol-LEC	pcna
rpa1.2	1.98595e-08	1.73187	0.728	0.494	0.00050183	7d-prol-LEC	rpa1
mcm7.2	4.49809e-06	1.71384	0.642	0.456	0.113662	7d-prol-LEC	mcm7
rrm1.2	2.5933e-06	1.68436	0.642	0.464	0.0655302	7d-prol-LEC	rrm1
si:ch211-227m13.1.2	7.50564e-08	1.67239	0.667	0.507	0.0018966	7d-prol-LEC	si:ch211-227m13.1
dnajc9.1	2.41878e-05	1.61647	0.531	0.346	0.611201	7d-prol-LEC	dnajc9
adgrl3.1.2	1.0564e-07	1.59162	0.753	0.504	0.00266941	7d-prol-LEC	adgrl3.1
tspan18a.1	1.42285e-07	1.55705	0.728	0.592	0.00359539	7d-prol-LEC	tspan18a
mcm4.2	3.65878e-07	1.54405	0.728	0.559	0.00924538	7d-prol-LEC	mcm4
akr1a1b.2	6.56631e-06	1.54201	0.654	0.483	0.165924	7d-prol-LEC	akr1a1b
psma6b	1.82019e-05	1.51885	0.531	0.329	0.459945	7d-prol-LEC	psma6b
f2r.2	2.19109e-09	1.50198	0.864	0.746	5.53666e-05	7d-prol-LEC	f2r
si:ch211-152c2.3.2	4.32923e-13	1.47968	0.951	0.847	1.09395e-08	7d-prol-LEC	si:ch211-152c2.3
b3gnt7.2	5.26303e-09	1.46578	0.716	0.459	0.000132992	7d-prol-LEC	b3gnt7
cdh6.2	5.12729e-14	1.46348	0.951	0.869	1.29562e-09	7d-prol-LEC	cdh6
lbr.1	2.5353e-07	1.43575	0.765	0.606	0.00640645	7d-prol-LEC	lbr
cldn11b.2	1.94407e-12	1.4194	0.938	0.84	4.91247e-08	7d-prol-LEC	cldn11b
aph1b.1	3.01654e-05	1.40081	0.704	0.54	0.762249	7d-prol-LEC	aph1b
osr1.2	5.25052e-06	1.38249	0.679	0.56	0.132675	7d-prol-LEC	osr1
ctsk.2	3.03361e-07	1.37218	0.778	0.61	0.00766564	7d-prol-LEC	ctsk
dab2.2	4.74395e-09	1.34754	0.901	0.8	0.000119875	7d-prol-LEC	dab2
letmd1.2	1.93999e-06	1.33571	0.728	0.527	0.0490216	7d-prol-LEC	letmd1
znf521.2	1.16481e-05	1.33167	0.679	0.482	0.294335	7d-prol-LEC	znf521
adam8a.2	2.81501e-06	1.32471	0.815	0.771	0.0711325	7d-prol-LEC	adam8a
strip1	4.76417e-06	1.31401	0.765	0.575	0.120386	7d-prol-LEC	strip1
hyal2b.2	5.40351e-09	1.30541	0.914	0.774	0.000136541	7d-prol-LEC	hyal2b
gpr183a.2	8.85595e-12	1.28684	0.914	0.724	2.23781e-07	7d-prol-LEC	gpr183a
calua.2	2.93495e-06	1.27603	0.827	0.723	0.0741632	7d-prol-LEC	calua
ctsh.2	9.7893e-06	1.22761	0.691	0.559	0.247366	7d-prol-LEC	ctsh
hapln3.2	8.85189e-10	1.22517	0.963	0.901	2.23678e-05	7d-prol-LEC	hapln3
cdipt.1	3.07141e-05	1.22112	0.79	0.622	0.776114	7d-prol-LEC	cdipt
ctsba.2	5.09249e-08	1.21769	0.852	0.693	0.00128682	7d-prol-LEC	ctsba
tpte.2	3.58052e-09	1.21678	0.877	0.73	9.04762e-05	7d-prol-LEC	tpte
rpa2.2	3.70778e-05	1.20973	0.58	0.386	0.936918	7d-prol-LEC	rpa2
rpz5.2	2.67239e-07	1.17645	0.889	0.773	0.00675286	7d-prol-LEC	rpz5
cbx5.2	2.56425e-06	1.16875	0.852	0.687	0.0647959	7d-prol-LEC	cbx5
si:ch211-288g17.3.2	2.8984e-05	1.16704	0.765	0.589	0.732396	7d-prol-LEC	si:ch211-288g17.3
syvn1	4.00535e-06	1.16609	0.753	0.594	0.101211	7d-prol-LEC	syvn1
napsa.2	3.77198e-06	1.16413	0.741	0.564	0.0953143	7d-prol-LEC	napsa
BX664622.1.2	1.52718e-05	1.15327	0.556	0.336	0.385902	7d-prol-LEC	BX664622.1
CU984579.1.2	2.79465e-11	1.1516	0.802	0.555	7.06181e-07	7d-prol-LEC	CU984579.1
krt18b.2	3.12239e-08	1.14436	0.951	0.864	0.000788997	7d-prol-LEC	krt18b
tbx1.2	2.28405e-11	1.14265	0.963	0.837	5.77156e-07	7d-prol-LEC	tbx1
pear1.2	2.93089e-08	1.1361	0.741	0.561	0.000740606	7d-prol-LEC	pear1
slc3a2b.2	1.54445e-05	1.12925	0.901	0.775	0.390267	7d-prol-LEC	slc3a2b
tm4sf18.2	3.55945e-08	1.12792	0.938	0.898	0.000899438	7d-prol-LEC	tm4sf18
rab11bb.2	6.49889e-10	1.09959	0.889	0.739	1.6422e-05	7d-prol-LEC	rab11bb
cdkn1a.1	1.35736e-05	1.09346	0.58	0.361	0.342992	7d-prol-LEC	cdkn1a
lgmn.2	2.21342e-09	1.08244	0.951	0.944	5.59309e-05	7d-prol-LEC	lgmn
si:dkey-28n18.9.2	3.89558e-06	1.07296	0.765	0.632	0.0984375	7d-prol-LEC	si:dkey-28n18.9
ssuh2rs1.1	2.29359e-06	1.06292	0.889	0.705	0.0579566	7d-prol-LEC	ssuh2rs1
ebf3a:1.2	4.90824e-08	1.05678	0.765	0.54	0.00124026	7d-prol-LEC	ebf3a:1
ptx3a.2	8.55672e-07	1.05137	0.815	0.713	0.021622	7d-prol-LEC	ptx3a
lamp2.2	2.84482e-07	1.0214	0.926	0.873	0.00718858	7d-prol-LEC	lamp2
smad5.2	1.41983e-06	1.01511	0.926	0.804	0.0358776	7d-prol-LEC	smad5
marcksl1a.2	5.54264e-10	0.989957	0.975	0.937	1.40057e-05	7d-prol-LEC	marcksl1a
ms4a17a.9.2	2.15867e-10	0.988082	0.975	0.905	5.45474e-06	7d-prol-LEC	ms4a17a.9
pmp22a.2	3.913e-08	0.98682	0.926	0.813	0.000988775	7d-prol-LEC	pmp22a
add3a.2	1.75491e-07	0.979525	0.901	0.822	0.00443448	7d-prol-LEC	add3a
gcnt4a.2	2.37103e-06	0.97563	0.889	0.825	0.0599136	7d-prol-LEC	gcnt4a
lima1a.2	1.48304e-05	0.968278	0.852	0.784	0.37475	7d-prol-LEC	lima1a
si:ch211-212k18.8.2	6.352e-06	0.964151	0.778	0.64	0.160509	7d-prol-LEC	si:ch211-212k18.8
fkbp1ab	3.85646e-05	0.962265	0.605	0.426	0.97449	7d-prol-LEC	fkbp1ab
si:ch211-195m9.3.1	4.97838e-06	0.958806	0.58	0.356	0.125799	7d-prol-LEC	si:ch211-195m9.3
mgat4b.2	1.15979e-05	0.954247	0.654	0.474	0.293066	7d-prol-LEC	mgat4b
cxcl12a.2	3.734e-07	0.947921	0.914	0.833	0.00943545	7d-prol-LEC	cxcl12a
hexb.2	2.39372e-09	0.94576	0.963	0.818	6.04869e-05	7d-prol-LEC	hexb
tuba8l4.1	4.50416e-07	0.935785	0.901	0.839	0.0113816	7d-prol-LEC	tuba8l4
zgc:110591.2	7.4149e-06	0.926834	0.815	0.726	0.187367	7d-prol-LEC	zgc:110591
tor1	2.27588e-05	0.918456	0.741	0.532	0.575091	7d-prol-LEC	tor1
sumo3b.2	1.52372e-06	0.911576	0.765	0.57	0.0385029	7d-prol-LEC	sumo3b
cd63.2	1.20606e-10	0.879852	1	0.994	3.04759e-06	7d-prol-LEC	cd63
ctsla.2	2.14644e-11	0.879701	0.988	0.995	5.42383e-07	7d-prol-LEC	ctsla
si:ch73-44m9.3:1.1	1.18091e-05	0.860543	0.741	0.538	0.298404	7d-prol-LEC	si:ch73-44m9.3:1
lyve1b.2	7.93696e-10	0.854808	0.988	0.944	2.00559e-05	7d-prol-LEC	lyve1b
psap.2	2.01783e-06	0.844871	0.975	0.882	0.0509884	7d-prol-LEC	psap
morf4l1.1	1.26495e-05	0.838776	0.765	0.565	0.319641	7d-prol-LEC	morf4l1
clic2.2	2.74857e-07	0.822533	1	0.935	0.00694536	7d-prol-LEC	clic2
hsd3b7.2	1.55001e-10	0.814656	0.975	0.911	3.91672e-06	7d-prol-LEC	hsd3b7
bcl2l16.1	4.81721e-09	0.813482	0.617	0.338	0.000121726	7d-prol-LEC	bcl2l16
mafba.2	7.55782e-08	0.812642	0.914	0.836	0.00190978	7d-prol-LEC	mafba
snx2.2	1.38283e-06	0.793331	0.79	0.644	0.0349428	7d-prol-LEC	snx2
ralgapa2.2	2.44505e-06	0.784924	0.79	0.624	0.0617839	7d-prol-LEC	ralgapa2
metrnla.2	2.04941e-08	0.767787	0.889	0.717	0.000517865	7d-prol-LEC	metrnla
ctsd.2	2.75449e-05	0.766149	0.914	0.88	0.696031	7d-prol-LEC	ctsd
myct1a.2	4.14309e-08	0.75507	0.963	0.911	0.00104692	7d-prol-LEC	myct1a
mrc1a.2	6.59191e-07	0.742094	0.901	0.878	0.0166571	7d-prol-LEC	mrc1a
tgfbi.2	4.13668e-07	0.734102	0.951	0.866	0.010453	7d-prol-LEC	tgfbi
akap12a.2	1.02169e-06	0.717512	0.642	0.42	0.0258171	7d-prol-LEC	akap12a
snx1a.2	2.05808e-06	0.712076	0.938	0.819	0.0520057	7d-prol-LEC	snx1a
rab5c.1	1.23614e-06	0.708057	0.963	0.857	0.0312361	7d-prol-LEC	rab5c
fn1a.2	3.85352e-06	0.698328	0.79	0.633	0.0973745	7d-prol-LEC	fn1a
stab1.2	3.53319e-06	0.695928	0.926	0.896	0.0892802	7d-prol-LEC	stab1
si:dkey-52l18.4.1	1.24695e-06	0.673998	0.877	0.726	0.0315092	7d-prol-LEC	si:dkey-52l18.4
mmp14b.2	3.2181e-06	0.659409	0.889	0.79	0.0813182	7d-prol-LEC	mmp14b
zgc:171679.2	1.62458e-05	0.649097	0.889	0.748	0.410516	7d-prol-LEC	zgc:171679
arl4aa.2	2.11732e-07	0.628743	0.84	0.663	0.00535026	7d-prol-LEC	arl4aa
dhrs3a.2	3.63924e-05	0.586164	0.815	0.697	0.919599	7d-prol-LEC	dhrs3a
hmgb2b.2	2.46891e-05	0.577482	0.864	0.771	0.623868	7d-prol-LEC	hmgb2b
im:7151449.2	1.86141e-05	0.548453	0.753	0.596	0.470361	7d-prol-LEC	im:7151449
loxl1.2	6.34035e-06	0.468673	0.988	0.944	0.160214	7d-prol-LEC	loxl1
mrc1b.2	5.22522e-06	0.44887	0.864	0.736	0.132036	7d-prol-LEC	mrc1b
slc22a16.2	7.50894e-06	0.207561	0.556	0.321	0.189743	7d-prol-LEC	slc22a16
arrdc2.2	3.02551e-05	0.161424	0.901	0.847	0.764517	7d-prol-LEC	arrdc2
polr2b.2	7.50846e-08	-1.25221	0.988	0.985	0.00189731	7d-prol-LEC	polr2b
igfbp7.2	1.47788e-07	-1.30528	0.963	0.972	0.00373445	7d-prol-LEC	igfbp7
krt18a.1.2	6.10339e-10	-1.3778	1	0.993	1.54226e-05	7d-prol-LEC	krt18a.1
id1.2	5.29988e-07	-2.0102	0.889	0.901	0.0133923	7d-prol-LEC	id1
ehd4.2	7.99454e-09	-2.04847	0.914	0.95	0.000202014	7d-prol-LEC	ehd4
podxl.2	3.61825e-05	-2.0589	0.901	0.898	0.914297	7d-prol-LEC	podxl
jam2a.2	1.19637e-05	-2.0939	0.864	0.877	0.302311	7d-prol-LEC	jam2a
kdrl.2	3.65294e-12	-2.3315	0.988	0.978	9.23062e-08	7d-prol-LEC	kdrl
zgc:64106.2	2.93373e-05	-2.35732	0.556	0.714	0.741324	7d-prol-LEC	zgc:64106
hopx.2	9.8766e-06	-2.38468	0.753	0.812	0.249572	7d-prol-LEC	hopx
aoc2.2	6.7506e-06	-2.55282	1	0.999	0.170581	7d-prol-LEC	aoc2
igfbp1a.2	1.10853e-06	-2.76021	0.864	0.933	0.0280116	7d-prol-LEC	igfbp1a
epas1a.2	2.86019e-06	-2.86788	0.543	0.748	0.0722743	7d-prol-LEC	epas1a
aplnrb.2	1.67022e-06	-2.90802	0.864	0.888	0.0422047	7d-prol-LEC	aplnrb
cdh5.2	3.24762e-08	-3.18494	0.852	0.864	0.000820641	7d-prol-LEC	cdh5
oit3.2	2.93435e-05	-3.23451	0.58	0.776	0.741482	7d-prol-LEC	oit3
rgcc.2	6.1005e-07	-3.24631	0.877	0.863	0.0154154	7d-prol-LEC	rgcc
flt1.2	1.215e-05	-3.55762	0.827	0.851	0.307018	7d-prol-LEC	flt1
