# Supplementary material
Source: Research Square preprint supplement (doi:10.21203/rs.3.rs-5333191/v1)
Supplement: Supplementary file 2 [file 8510b91aa61bb3ecd5080cb7.xlsx]

## Sheet: healthy prol lCap LEC
Cell Type:	LEC
Dataset:	ECs from healthy mice			Petkova et al. 2023
Comaprison:	Proliferating cluster compared to tall other clusters
Up-regulated								Down-regulated
	p_val	avg_log2FC	pct.1	pct.2	p_val_adj				p_val	avg_log2FC	pct.1	pct.2	p_val_adj
Gm14091	1.70728e-77	6.46955	0.714	0.016	4.64961e-73			Aldoa	7.37225e-07	-1.38485	1	1	0.0200776
Gm14024	4.26106e-64	7.41111	0.571	0.012	1.16046e-59			Cp	2.94204e-06	-2.01024	1	0.999	0.0801234
Hist1h2ae	1.11214e-55	6.17644	0.476	0.009	3.02881e-51			S100a16	1.47475e-05	-1.21328	1	1	0.401632
Depdc1a	3.455e-54	7.80668	0.714	0.03	9.40933e-50
Gm38037	8.69105e-50	7.64192	0.571	0.019	2.36692e-45
4933413g19rik	7.86917e-43	6.49115	0.429	0.011	2.14309e-38
Hist1h2af	1.41916e-42	6.14119	0.381	0.008	3.86495e-38
Ac034285.3	2.18167e-42	5.88097	0.381	0.008	5.94156e-38
Kifc5b	7.21701e-36	7.43157	0.381	0.011	1.96548e-31
Mmu-Mir-9769	1.53699e-35	5.62558	0.429	0.015	4.18585e-31
Bub1	2.59419e-35	6.36756	0.667	0.046	7.06501e-31
Kifc1	2.84972e-35	7.24655	0.667	0.047	7.76094e-31
Al590388.1	4.70833e-35	6.11873	0.286	0.005	1.28227e-30
Hist1h2ab	9.92494e-35	6.38776	0.333	0.008	2.70296e-30
Kif23	5.32477e-34	7.1917	0.857	0.092	1.45015e-29
Cep55	6.76237e-33	7.99193	0.667	0.051	1.84166e-28
Cks2	9.06915e-33	5.44717	0.905	0.111	2.46989e-28
Depdc1b	1.16107e-30	6.98523	0.333	0.01	3.16206e-26
Bub1b	1.92887e-30	7.02408	0.762	0.079	5.25308e-26
Rp23-45g16.9	1.30998e-29	5.10924	0.524	0.032	3.56759e-25
Knstrn	1.45007e-29	6.76159	0.905	0.131	3.94912e-25
Melk	7.85e-29	7.20167	0.619	0.051	2.13787e-24
Phf19	1.01877e-28	4.26491	0.667	0.058	2.77452e-24
Ska1	4.32746e-28	7.55191	0.476	0.028	1.17854e-23
Pmch	1.24111e-27	7.17487	0.286	0.008	3.38003e-23
Cdkn3	1.40353e-27	6.05651	0.667	0.064	3.82236e-23
Hist1h1b	1.55718e-27	5.41357	0.429	0.022	4.24081e-23
Cdc25c	6.4365e-27	7.09231	0.571	0.045	1.75292e-22
Ccnb1	6.89596e-27	7.3136	0.857	0.124	1.87804e-22
Ckap2	1.14317e-26	6.71683	0.857	0.123	3.11331e-22
Ckap2l	1.2341e-26	7.96774	0.81	0.112	3.36094e-22
Aspm	1.69927e-26	8.24961	0.667	0.069	4.62779e-22
Cdca3	1.31196e-25	7.15776	0.857	0.138	3.573e-21
Mir5134	1.54531e-24	5.71578	0.238	0.006	4.20849e-20
Ccnb2	1.42515e-23	6.56943	1	0.254	3.88126e-19
Rp23-114e15.17	1.91992e-23	5.0597	0.333	0.015	5.22871e-19
Anln	2.27679e-23	6.92078	0.81	0.132	6.2006e-19
Shcbp1	3.59564e-23	7.21545	0.571	0.056	9.79237e-19
Kif20b	1.39564e-22	5.52132	0.667	0.081	3.80088e-18
Nek2	1.56565e-22	7.72393	0.762	0.115	4.26388e-18
Stil	1.75481e-22	5.50171	0.476	0.037	4.77906e-18
Ect2	2.01673e-22	6.25943	0.667	0.084	5.49235e-18
Cenpw	2.80938e-22	3.20848	0.619	0.063	7.65105e-18
Cenpe	3.8258e-22	7.10606	0.714	0.1	1.04192e-17
Kif15	5.1726e-22	6.62713	0.667	0.085	1.40871e-17
Tpx2	6.75869e-22	6.52517	0.857	0.161	1.84066e-17
Mki67	1.19442e-21	6.85734	0.952	0.24	3.25288e-17
Cdca5	1.91371e-21	7.00221	0.571	0.06	5.2118e-17
Sapcd2	4.05088e-21	8.262	0.571	0.062	1.10322e-16
Dbf4	4.17448e-21	3.74529	0.857	0.154	1.13688e-16
Ndc80	7.18728e-21	6.87225	0.667	0.091	1.95738e-16
Gm6461	1.98019e-20	5.19975	0.381	0.024	5.39286e-16
Kif2c	2.12756e-20	7.58656	0.762	0.13	5.79419e-16
Ac125099.2	2.19781e-20	4.61378	0.238	0.008	5.98552e-16
Fam64a	3.87642e-20	7.54136	0.81	0.163	1.0557e-15
Ac122428.1	3.886e-20	5.3771	0.619	0.079	1.05831e-15
Kif18b	5.11302e-20	6.00831	0.524	0.054	1.39248e-15
Birc5	5.18892e-20	6.46272	0.857	0.192	1.41315e-15
Foxm1	8.70607e-20	6.71655	0.571	0.066	2.37101e-15
Hist2h2ac	8.7371e-20	4.11477	0.286	0.013	2.37946e-15
Hist1h1d	2.90846e-19	5.45239	0.238	0.009	7.92091e-15
Sgol2a	4.22634e-19	5.71396	0.524	0.057	1.151e-14
Prc1	4.38228e-19	7.17481	0.905	0.223	1.19347e-14
Plk1	9.51286e-19	6.6899	0.81	0.172	2.59073e-14
Arhgef39	1.15095e-18	7.22588	0.619	0.088	3.1345e-14
Cenpa	2.00148e-18	5.07703	0.952	0.304	5.45082e-14
Pif1	2.17197e-18	8.23805	0.524	0.059	5.91514e-14
Hist1h2ap	2.58074e-18	5.17238	0.667	0.102	7.02838e-14
Spag5	3.85173e-18	7.53963	0.619	0.091	1.04898e-13
2700099c18rik	5.40873e-18	6.14608	0.429	0.039	1.47301e-13
Nuf2	5.80396e-18	7.10738	0.714	0.133	1.58065e-13
Sgol1	1.14857e-17	6.93435	0.429	0.04	3.12803e-13
Spc25	2.05857e-17	5.91754	0.667	0.114	5.6063e-13
Hmgb1-Ps8	2.08822e-17	5.53992	0.19	0.006	5.68706e-13
Hist1h3e	2.25192e-17	5.34766	0.19	0.006	6.13287e-13
Mis18bp1	2.30952e-17	5.58863	0.476	0.051	6.28975e-13
Cenpf	2.36838e-17	6.65879	0.857	0.226	6.45004e-13
Arhgap11a	2.81057e-17	6.25458	0.429	0.041	7.6543e-13
Ncapg	4.02543e-17	5.60722	0.571	0.079	1.09629e-12
H1fx	4.14437e-17	4.49308	0.286	0.016	1.12868e-12
Diap3	4.29744e-17	4.80786	0.476	0.05	1.17037e-12
Parpbp	4.58522e-17	7.34782	0.429	0.042	1.24874e-12
Kif20a	5.77511e-17	5.81383	0.952	0.343	1.57279e-12
Espl1	8.50865e-17	6.70534	0.619	0.098	2.31724e-12
Cenpp	9.99332e-17	4.87078	0.524	0.066	2.72158e-12
Troap	1.34813e-16	7.84657	0.571	0.082	3.67149e-12
Gm26765	2.60579e-16	3.54599	0.714	0.128	7.0966e-12
Iqgap3	2.88027e-16	6.16885	0.762	0.157	7.84412e-12
Top2a	3.27888e-16	6.76779	0.857	0.23	8.92971e-12
Dlgap5	5.11578e-16	7.21873	0.762	0.184	1.39323e-11
Spdl1	6.30041e-16	7.24156	0.381	0.035	1.71585e-11
2610203c22rik	6.76455e-16	6.74005	0.19	0.007	1.84226e-11
Gm20470	7.87512e-16	2.72027	0.667	0.101	2.14471e-11
Ska3	1.54747e-15	5.6656	0.524	0.073	4.21438e-11
Ube2c	1.57313e-15	6.16429	0.762	0.19	4.28427e-11
Cdca8	1.85338e-15	6.62946	0.81	0.232	5.04749e-11
Racgap1	2.88314e-15	4.77514	1	0.605	7.85195e-11
Kif11	3.03166e-15	6.7644	0.619	0.112	8.25643e-11
Mastl	3.26381e-15	4.52479	0.476	0.059	8.88865e-11
Cdc20	4.11213e-15	6.04262	0.905	0.337	1.1199e-10
Ccna2	4.22915e-15	6.04312	0.857	0.286	1.15177e-10
Tacc3	7.63669e-15	5.25933	0.857	0.292	2.07977e-10
Cdca2	1.27456e-14	6.62661	0.619	0.115	3.47115e-10
Cenpk	1.30869e-14	4.37452	0.429	0.048	3.56408e-10
Aurka	2.09144e-14	6.80435	0.667	0.138	5.69583e-10
Pbk	4.72117e-14	6.6964	0.524	0.083	1.28576e-09
Kif22	4.93579e-14	5.59229	0.762	0.208	1.34421e-09
Rad54b	5.12172e-14	5.71874	0.333	0.03	1.39485e-09
Hmgn2	5.79202e-14	2.46725	1	0.76	1.5774e-09
Gm37676	6.53868e-14	5.03795	0.238	0.014	1.78074e-09
Zwilch	7.97585e-14	4.39912	0.476	0.063	2.17214e-09
Prr11	1.0284e-13	4.39328	0.476	0.063	2.80075e-09
Gm27254	2.28622e-13	5.33441	0.19	0.009	6.2263e-09
Cenpm	2.28651e-13	7.15607	0.429	0.056	6.22707e-09
2700094k13rik	2.90009e-13	3.8447	0.762	0.198	7.89811e-09
Hspb6	3.44826e-13	3.26708	0.762	0.193	9.391e-09
Lmnb1	3.55465e-13	4.11012	0.857	0.294	9.68074e-09
Kif4	5.96629e-13	5.03126	0.619	0.128	1.62486e-08
Cdk1	7.77885e-13	7.09687	0.667	0.167	2.11849e-08
Kif14	9.45628e-13	6.93394	0.381	0.045	2.57532e-08
Gm11192	9.6973e-13	4.22943	0.286	0.023	2.64096e-08
Tubb4b-Ps1	1.0658e-12	4.92151	0.286	0.023	2.9026e-08
Casc5	2.06705e-12	6.43036	0.619	0.133	5.62939e-08
Mad2l1	2.33434e-12	4.11698	0.667	0.164	6.35733e-08
Gm9211	2.38198e-12	5.19802	0.238	0.016	6.4871e-08
Gm12811	2.992e-12	4.91595	0.286	0.025	8.1484e-08
Gm26625	3.04528e-12	3.27797	0.333	0.033	8.29352e-08
Spc24	3.51155e-12	6.52906	0.619	0.147	9.56337e-08
Hmmr	3.88015e-12	6.51105	0.667	0.17	1.05672e-07
Gm26623	4.13996e-12	3.82558	0.476	0.071	1.12748e-07
Gm10184	4.39975e-12	5.32391	0.238	0.017	1.19823e-07
Hirip3	4.48179e-12	4.23185	0.619	0.13	1.22057e-07
Rp23-472g22.2	6.97166e-12	5.06119	0.238	0.017	1.89866e-07
Tk1	8.31802e-12	4.48141	0.762	0.248	2.26533e-07
Lmnb2	8.61667e-12	4.97047	0.81	0.316	2.34666e-07
Hmgb2	9.80315e-12	4.4522	0.905	0.417	2.66979e-07
Gm37416	1.10549e-11	4.02505	0.476	0.078	3.01069e-07
Fgf14	1.36005e-11	5.57585	0.095	0.002	3.70395e-07
Rrm1	1.54097e-11	3.43464	0.952	0.461	4.19668e-07
Gm6651	1.64555e-11	5.32613	0.19	0.011	4.4815e-07
Cdc45	2.35709e-11	4.75926	0.524	0.098	6.4193e-07
Tuba1c	2.98605e-11	4.9706	0.762	0.275	8.1322e-07
Esco2	4.09277e-11	5.96384	0.476	0.081	1.11463e-06
Ube2s	5.01674e-11	3.19174	0.762	0.236	1.36626e-06
Hist1h4i	5.64717e-11	3.50019	0.238	0.019	1.53795e-06
Plk4	5.708e-11	3.41072	0.667	0.171	1.55452e-06
Ncapd2	6.22126e-11	4.74766	0.81	0.304	1.6943e-06
Rp23-326p16.4	6.4821e-11	4.4662	0.286	0.028	1.76534e-06
Fignl1	7.51404e-11	4.62088	0.381	0.051	2.04637e-06
Lctl	7.96816e-11	3.37358	0.19	0.012	2.17005e-06
Cenpn	8.14852e-11	5.01695	0.429	0.07	2.21917e-06
Gm15443	9.41672e-11	2.88107	0.476	0.074	2.56455e-06
Stmn1	1.06739e-10	2.67714	0.952	0.562	2.90694e-06
Trim59	1.141e-10	4.30883	0.571	0.134	3.10739e-06
Rp24-230j14.4	1.26178e-10	3.64143	0.524	0.102	3.43632e-06
Gm14150	1.47397e-10	3.96314	0.571	0.129	4.01421e-06
Gm29488	1.51356e-10	4.66404	0.238	0.02	4.12202e-06
Arhgap33	1.84182e-10	3.05282	0.524	0.102	5.01602e-06
Gm6293	1.99414e-10	3.22364	0.333	0.039	5.43085e-06
Cntrob	2.73891e-10	4.11922	0.476	0.085	7.45915e-06
Al662809.1	2.81185e-10	2.12655	0.571	0.107	7.65779e-06
Gm23865	2.87384e-10	2.61698	0.571	0.12	7.82662e-06
Tubb6	2.95681e-10	3.77113	0.952	0.7	8.05257e-06
Chek2	3.26759e-10	4.79935	0.714	0.237	8.89895e-06
H2afx	3.58936e-10	5.07113	0.714	0.236	9.77527e-06
Gm10524	3.78502e-10	2.80728	0.714	0.184	1.03081e-05
Psrc1	4.1287e-10	6.47768	0.571	0.142	1.12441e-05
Gm17097	4.31815e-10	6.24023	0.143	0.007	1.17601e-05
Arhgap19	4.40309e-10	5.69245	0.476	0.09	1.19914e-05
Gm12122	4.69702e-10	4.62131	0.143	0.007	1.27919e-05
Rrm2	4.71401e-10	5.44726	0.524	0.115	1.28381e-05
Hist1h4c	4.83037e-10	4.76087	0.143	0.007	1.3155e-05
Xkr5	4.96261e-10	5.96404	0.333	0.043	1.35152e-05
Kntc1	5.32004e-10	4.94786	0.286	0.032	1.44886e-05
Gm8807	5.71162e-10	5.33568	0.143	0.007	1.5555e-05
Tubb4b	5.75395e-10	2.08837	1	0.944	1.56703e-05
Gm15195	5.9317e-10	3.95532	0.524	0.12	1.61544e-05
Nusap1	6.17034e-10	6.13698	0.524	0.121	1.68043e-05
3010026o09rik	8.23523e-10	3.69082	0.476	0.09	2.24278e-05
Gen1	8.31861e-10	5.97186	0.19	0.014	2.26549e-05
Mns1	9.36239e-10	4.08043	0.429	0.074	2.54975e-05
Gm28727	9.52407e-10	3.8356	0.238	0.022	2.59378e-05
Cep192	9.55921e-10	2.13381	0.762	0.232	2.60336e-05
Incenp	9.59617e-10	4.12542	0.667	0.217	2.61342e-05
Lrr1	1.04353e-09	6.21736	0.19	0.014	2.84195e-05
Proser3	1.04499e-09	3.67784	0.476	0.096	2.84593e-05
1190002f15rik	1.13842e-09	4.38045	0.667	0.211	3.10037e-05
Ccnf	1.20942e-09	6.65989	0.476	0.102	3.29374e-05
Kif18a	1.31864e-09	5.34331	0.476	0.101	3.59118e-05
Klhl41	1.33438e-09	6.03981	0.19	0.014	3.63404e-05
Fbxo5	1.44811e-09	3.20092	0.571	0.135	3.9438e-05
Ttk	1.45524e-09	4.77926	0.286	0.034	3.9632e-05
Gm14820	1.64066e-09	3.35549	0.429	0.075	4.46818e-05
Bex2	1.91753e-09	4.01228	0.238	0.023	5.22221e-05
Cenpu	2.21437e-09	3.62064	0.381	0.061	6.03061e-05
Gm4890	2.61071e-09	3.86165	0.238	0.023	7.11001e-05
Gm23634	2.81659e-09	2.62154	0.81	0.345	7.67071e-05
Cdc6	2.90138e-09	4.1709	0.429	0.078	7.90161e-05
Emc1	3.27715e-09	1.08011	1	0.979	8.925e-05
Vmn2r-Ps54	3.28189e-09	4.82853	0.143	0.008	8.93789e-05
4930568a12rik	3.37167e-09	5.39749	0.19	0.015	9.1824e-05
4930422m22rik	3.45307e-09	4.37624	0.143	0.008	9.40409e-05
Rp23-262j12.2	3.86166e-09	4.39334	0.19	0.015	0.000105169
Gm16436	4.02042e-09	5.20903	0.143	0.008	0.000109492
Hist1h2ac	4.12341e-09	4.58159	0.143	0.008	0.000112297
Gsg2	4.34649e-09	6.15709	0.381	0.062	0.000118372
Pmf1	4.39517e-09	2.44424	0.905	0.414	0.000119698
Ccdc18	4.64817e-09	4.43014	0.286	0.036	0.000126588
C330027c09rik	4.96371e-09	5.37458	0.429	0.08	0.000135182
Smc2	5.02435e-09	3.44407	0.762	0.295	0.000136833
Gm34267	5.35803e-09	5.09614	0.19	0.015	0.000145921
Gm13889	5.59136e-09	2.68195	0.333	0.045	0.000152275
Wi1-49p9.2	6.44638e-09	3.50977	0.571	0.151	0.000175561
Plxnb3	6.44946e-09	1.32877	1	1	0.000175645
H2afz	6.69663e-09	2.89367	0.81	0.504	0.000182376
Eldr	6.87324e-09	5.87075	0.238	0.025	0.000187186
Asf1b	7.42215e-09	4.95063	0.524	0.133	0.000202135
Adcy5	7.62928e-09	5.01726	0.19	0.016	0.000207776
Ppp1r18os	7.67113e-09	3.18531	0.524	0.126	0.000208915
Tmem194	8.96128e-09	3.98047	0.429	0.084	0.000244052
Gtse1	9.50119e-09	6.9737	0.429	0.089	0.000258755
Ccsap	9.65672e-09	5.88821	0.286	0.037	0.000262991
Mxd3	1.01305e-08	3.2879	0.857	0.538	0.000275895
Fam73a	1.0416e-08	3.22039	0.762	0.353	0.000283669
Mroh8	1.05354e-08	2.52751	0.857	0.337	0.000286922
Ube2t	1.15044e-08	3.89062	0.476	0.106	0.00031331
Gm5620	1.24628e-08	3.75989	0.524	0.127	0.000339412
Gm37499	1.25819e-08	4.92868	0.238	0.025	0.000342655
Ac124745.1	1.62624e-08	6.2523	0.143	0.009	0.00044289
Adhfe1	1.66459e-08	4.92196	0.143	0.009	0.000453335
Gm11198	1.66459e-08	5.48044	0.143	0.009	0.000453335
Gm10282	1.77087e-08	5.03028	0.19	0.016	0.000482279
Gm10182	1.79767e-08	3.27273	0.619	0.202	0.000489578
Hist1h4j	1.82697e-08	5.11078	0.143	0.009	0.000497557
Rtel1	1.90619e-08	3.71666	0.524	0.131	0.000519131
1700020g17rik	2.05167e-08	5.08962	0.143	0.009	0.000558753
Hs3st3b1	2.08241e-08	3.48872	0.19	0.017	0.000567123
Cfhr1	2.09973e-08	5.29195	0.143	0.009	0.00057184
Ubald2	2.15653e-08	1.91387	0.952	0.614	0.00058731
1700120k04rik	2.48147e-08	4.05232	0.19	0.017	0.000675805
Aunip	2.57005e-08	5.34671	0.238	0.027	0.000699929
Kpna2	2.71945e-08	3.98475	0.762	0.351	0.000740614
Apba1	3.16893e-08	2.70305	0.429	0.084	0.000863027
Kdm8	3.27491e-08	3.32939	0.476	0.11	0.00089189
Aipl1	3.28482e-08	5.51576	0.333	0.055	0.000894588
Gm37397	3.76452e-08	1.71207	1	0.843	0.00102523
9630013d21rik	4.07105e-08	5.15674	0.286	0.041	0.00110871
Aurkb	4.18013e-08	6.62593	0.524	0.155	0.00113842
9030407p20rik	4.33323e-08	2.98998	0.238	0.027	0.00118011
Gas2l3	4.44548e-08	4.80764	0.476	0.12	0.00121068
G2e3	4.75421e-08	3.29604	0.619	0.202	0.00129476
Gm16510	4.80307e-08	3.97144	0.429	0.088	0.00130807
Rp24-127m20.11	4.94381e-08	2.77066	0.333	0.053	0.0013464
Gm36975	5.04924e-08	1.70628	0.333	0.051	0.00137511
Ncapg2	5.74357e-08	2.77744	0.571	0.164	0.0015642
Gm21985	5.76383e-08	2.06531	0.714	0.233	0.00156972
1700031a10rik	6.31933e-08	5.58864	0.143	0.01	0.00172101
2810417h13rik	6.39773e-08	5.19087	0.524	0.152	0.00174236
Tuba1b	6.40743e-08	1.89908	1	0.956	0.001745
Gm21897	6.67828e-08	1.24456	0.667	0.179	0.00181876
Hist1h2be	6.85737e-08	2.63576	0.238	0.027	0.00186754
Gm4353	6.91017e-08	3.44578	0.381	0.07	0.00188192
Gm11491	7.00985e-08	3.37839	0.333	0.056	0.00190906
Trp53tg5	7.24021e-08	3.93304	0.19	0.018	0.0019718
Rp24-378g4.3	7.3036e-08	3.16686	0.81	0.489	0.00198906
Cit	7.57675e-08	3.05002	0.952	0.618	0.00206345
Zfp382	7.93703e-08	3.6728	0.381	0.073	0.00216157
Gm20379	8.68099e-08	3.60656	0.19	0.018	0.00236418
Neurl1b	9.3099e-08	4.83398	0.476	0.123	0.00253546
Neil3	9.63215e-08	5.40375	0.619	0.215	0.00262322
4933404o12rik	9.90921e-08	1.71869	1	0.592	0.00269867
Kera	1.05752e-07	4.18721	0.381	0.072	0.00288006
Rp23-92m3.4	1.05884e-07	2.33403	0.714	0.242	0.00288363
Gm14892	1.07738e-07	5.3721	0.143	0.01	0.00293414
Ncaph	1.08857e-07	3.91251	0.619	0.226	0.0029646
Bora	1.25079e-07	2.92017	0.476	0.121	0.00340641
Fam83d	1.39248e-07	6.54278	0.429	0.105	0.00379229
Rp24-535m14.2	1.48317e-07	4.40359	0.286	0.043	0.00403926
Ccl25	1.53918e-07	1.27355	0.667	0.209	0.00419181
Odf2	1.54614e-07	1.87099	0.952	0.645	0.00421075
Gm17233	1.57414e-07	3.46657	0.333	0.058	0.00428703
Lum	1.57984e-07	1.60946	0.762	0.255	0.00430253
Fam166a	1.60904e-07	2.447	0.81	0.479	0.00438207
Kmt5a	1.76037e-07	1.5206	0.714	0.237	0.00479419
Tmpo	1.77702e-07	2.66528	0.905	0.638	0.00483955
Rps15a-Ps6	1.85153e-07	4.84522	0.238	0.03	0.00504246
Gm7308	1.96242e-07	4.83688	0.238	0.029	0.00534444
Snhg5	1.9853e-07	1.3137	0.667	0.206	0.00540678
Tmem37	2.1967e-07	6.21576	0.143	0.011	0.0059825
Rp23-151c5.2	2.2409e-07	5.41725	0.143	0.011	0.00610287
Cenpl	2.2455e-07	3.90461	0.524	0.155	0.0061154
Pbdc1	2.37858e-07	2.04406	0.667	0.226	0.00647782
Gm38012	2.52469e-07	4.72509	0.143	0.011	0.00687575
Ckap5	2.63839e-07	2.1172	0.905	0.494	0.00718539
Tubb3	2.64016e-07	4.57708	0.238	0.029	0.00719022
1700086o06rik	2.73889e-07	2.71608	0.619	0.195	0.00745909
Anp32e	2.78186e-07	2.25158	0.857	0.548	0.00757611
Gm26737	2.78312e-07	3.55981	0.476	0.125	0.00757955
Akap14	2.89975e-07	4.1681	0.143	0.011	0.00789719
Platr22	2.89975e-07	3.75765	0.143	0.011	0.00789719
Apool	3.0146e-07	1.75222	0.619	0.189	0.00820995
Apitd1	3.13223e-07	4.25346	0.19	0.02	0.0085303
Rp23-225m12.1	3.13766e-07	5.19031	0.143	0.011	0.00854511
Zfp518b	3.16869e-07	1.55073	1	0.992	0.00862962
Poc1a	3.63102e-07	3.38076	0.429	0.101	0.00988871
Gm27037	3.67128e-07	5.08529	0.143	0.011	0.00999836
Gm37060	3.76006e-07	3.25775	0.333	0.061	0.0102401
Tagap1	3.78974e-07	2.54217	0.476	0.12	0.010321
E030024n20rik	3.90958e-07	4.40472	0.286	0.044	0.0106474
Ddias	4.05909e-07	5.86615	0.19	0.021	0.0110545
Fads2	4.15243e-07	4.10914	0.381	0.083	0.0113087
Cdc23	4.29535e-07	2.25509	0.952	0.651	0.011698
Gm4617	4.41341e-07	3.72539	0.429	0.093	0.0120195
E2f7	4.45676e-07	2.94018	0.619	0.238	0.0121375
Cks1b	5.09907e-07	2.45217	0.762	0.368	0.0138868
Tmem237	5.30924e-07	2.31354	0.762	0.358	0.0144592
Zbtb10	6.15954e-07	1.67246	0.952	0.829	0.0167749
5033403f01rik	6.36176e-07	5.8184	0.143	0.012	0.0173256
Hist1h4d	6.41291e-07	2.62805	0.476	0.116	0.0174649
Polh	6.44375e-07	1.98962	0.524	0.146	0.0175489
Gm1976	6.53557e-07	3.78305	0.381	0.085	0.017799
Ccdc38	6.89307e-07	2.00876	0.762	0.303	0.0187726
Nop9	7.18806e-07	1.12231	0.714	0.255	0.019576
Vbp1	7.46996e-07	1.90897	0.762	0.322	0.0203437
Rp24-142b15.7	7.51444e-07	4.64542	0.143	0.012	0.0204648
Ulbp1	7.58283e-07	3.53309	0.333	0.065	0.0206511
Gm11788	7.96572e-07	2.76218	0.333	0.062	0.0216938
Hn1	8.69625e-07	2.74789	0.81	0.501	0.0236834
Hist1h2br	8.70587e-07	5.20684	0.143	0.012	0.0237096
Rnf26	9.17098e-07	3.22811	0.619	0.232	0.0249762
Gm16596	9.32786e-07	2.36019	0.476	0.118	0.0254035
Rp24-230j14.5	9.50864e-07	2.58788	0.81	0.49	0.0258958
Gm26770	9.79598e-07	2.90598	0.476	0.133	0.0266784
Gm3222	1.00389e-06	4.36218	0.238	0.032	0.02734
Suv39h1	1.04078e-06	2.80415	0.619	0.21	0.0283447
Rp24-503l4.2	1.05111e-06	3.35035	0.524	0.139	0.028626
Setd8	1.11421e-06	2.59849	0.476	0.131	0.0303444
Rad51ap1	1.13341e-06	5.44436	0.476	0.151	0.0308674
Gm16023	1.14536e-06	2.427	0.476	0.123	0.0311927
Gm17200	1.19693e-06	1.08124	1	0.986	0.0325971
Gp1bb	1.22351e-06	2.43568	0.429	0.098	0.0333212
Tmem106a	1.27775e-06	1.56842	0.762	0.298	0.0347983
Slc35f2	1.31637e-06	2.02092	0.476	0.127	0.0358499
Cenpt	1.5161e-06	1.98909	0.81	0.454	0.0412895
Clip2	1.627e-06	1.15654	1	0.951	0.0443097
Pln	1.70649e-06	2.52619	0.286	0.048	0.0464745
Gm9008	1.77299e-06	4.7686	0.238	0.035	0.0482857
Zfp748	1.80017e-06	1.65852	0.81	0.547	0.0490258
Ticam2	1.81582e-06	1.16436	1	0.914	0.0494521
Nudcd3	1.82776e-06	1.36074	0.476	0.12	0.0497773
Pcnt	1.84704e-06	2.75625	0.81	0.513	0.0503022
Nde1	1.87928e-06	2.13483	0.905	0.772	0.0511802
Tcaim	1.95708e-06	1.15733	0.429	0.11	0.0532991
Oip5	2.00233e-06	3.80641	0.286	0.05	0.0545314
Wee1	2.00383e-06	3.47922	0.476	0.142	0.0545722
A930015d03rik	2.00744e-06	2.67026	0.286	0.049	0.0546707
Usp11	2.02975e-06	3.22562	0.429	0.107	0.0552782
Gm38118	2.07258e-06	1.50488	0.667	0.253	0.0564445
Gm28535	2.13044e-06	3.9335	0.143	0.013	0.0580205
2810408i11rik	2.17096e-06	4.88477	0.238	0.037	0.0591238
4930579g24rik	2.27708e-06	3.61995	0.429	0.112	0.0620141
Nrm	2.28321e-06	2.03325	0.81	0.418	0.0621809
Gm6644	2.36119e-06	5.24064	0.143	0.013	0.0643046
Ab041806	2.40191e-06	5.20443	0.143	0.013	0.0654136
Tmem253	2.40191e-06	6.20086	0.143	0.013	0.0654136
St3gal2	2.44359e-06	1.49838	0.952	0.796	0.0665486
Gm3695	2.47611e-06	3.32791	0.19	0.023	0.0674344
Grin2d	2.47952e-06	1.74709	0.333	0.064	0.0675274
Rp23-38l11.2	2.48942e-06	4.02699	0.381	0.084	0.0677968
Ntf5	2.56458e-06	5.63429	0.286	0.049	0.0698437
Gm7251	2.70663e-06	4.57783	0.238	0.034	0.0737124
1110001j03rik	2.74289e-06	2.16601	0.429	0.109	0.0746998
Rp23-92n2.2	2.84146e-06	4.59736	0.238	0.035	0.0773843
Fmr1	2.84475e-06	2.00137	0.476	0.128	0.077474
Megf8	3.05246e-06	1.68152	0.762	0.333	0.0831308
4933408j17rik	3.06559e-06	1.90205	0.667	0.244	0.0834882
Cenpi	3.25612e-06	4.86273	0.429	0.121	0.0886771
Rad51	3.288e-06	3.07258	0.619	0.224	0.0895453
Gm26827	3.5921e-06	2.29539	0.381	0.089	0.0978272
Bard1	3.63074e-06	3.33579	0.19	0.024	0.0988795
Gm26916	3.74308e-06	2.44098	0.619	0.219	0.101939
Ncmap	3.91094e-06	1.55404	0.905	0.672	0.106511
Gm10481	4.03454e-06	5.58941	0.095	0.006	0.109877
Nsl1	4.11696e-06	5.37069	0.333	0.075	0.112121
Diaph3	4.13073e-06	6.06446	0.095	0.006	0.112496
B930082k07rik	4.15579e-06	2.81855	0.286	0.049	0.113179
Gab3	4.18359e-06	2.13034	0.667	0.282	0.113936
Bc055324	4.1891e-06	3.24461	0.429	0.112	0.114086
Capn10	4.19197e-06	1.78901	0.905	0.758	0.114164
Gm5812	4.31176e-06	1.14503	0.619	0.232	0.117427
Azin1	4.32375e-06	2.06946	0.857	0.531	0.117753
Zfp759	4.55216e-06	1.57968	0.619	0.203	0.123974
Gm13216	4.64559e-06	5.5477	0.095	0.006	0.126518
Ccdc61	4.72825e-06	1.88624	0.857	0.52	0.128769
4930556j24rik	4.75081e-06	1.63967	0.905	0.537	0.129384
Lrfn4	4.78823e-06	3.5866	0.286	0.053	0.130403
1810043h04rik	5.12295e-06	2.08484	0.524	0.157	0.139518
Mis12	5.32462e-06	1.92077	0.762	0.347	0.145011
Odf4	5.34656e-06	2.7468	0.143	0.014	0.145608
Gm13024	5.43305e-06	5.21291	0.143	0.014	0.147964
Pou3f3	5.43305e-06	5.07503	0.143	0.014	0.147964
Tgtp2	5.62195e-06	1.3061	1	0.896	0.153108
1700094j05rik	5.63523e-06	3.29087	0.238	0.038	0.15347
Col7a1	5.82779e-06	1.54748	0.762	0.359	0.158714
Trip13	6.13067e-06	4.46064	0.333	0.077	0.166963
B230398e01rik	6.37174e-06	2.14979	0.333	0.072	0.173528
1500002c15rik	6.38059e-06	1.24282	1	0.683	0.173769
Fam111a	6.41659e-06	2.08631	0.571	0.2	0.17475
Gapdh-Ps14	6.58645e-06	3.85499	0.429	0.114	0.179376
Rp23-293k21.2	6.63561e-06	3.19568	0.19	0.025	0.180714
A830018l16rik	6.66878e-06	3.58735	0.333	0.068	0.181617
Ncapd3	6.73737e-06	2.22076	0.667	0.285	0.183485
Sept5	6.77094e-06	1.90123	0.524	0.155	0.1844
Hunk	6.96846e-06	3.73631	0.19	0.025	0.189779
4930513n10rik	7.12355e-06	1.76935	0.905	0.744	0.194003
Hist1h1e	7.23497e-06	3.0897	0.429	0.124	0.197037
Gm8580	7.23738e-06	3.7675	0.333	0.071	0.197103
Npnt	7.40442e-06	3.23189	0.524	0.174	0.201652
Sytl3	7.63786e-06	4.2467	0.238	0.039	0.20801
Fank1	7.91895e-06	5.35503	0.143	0.015	0.215665
Asb18	7.97182e-06	3.37931	0.333	0.07	0.217105
Gm13056	8.16353e-06	2.48654	0.333	0.075	0.222325
Gng3	8.36218e-06	2.42403	0.381	0.091	0.227736
Gm12319	8.41951e-06	5.13071	0.143	0.015	0.229297
Gm26616	8.43446e-06	1.56002	0.476	0.146	0.229704
Cd276	8.68763e-06	2.31707	0.81	0.363	0.236599
Vamp7-Ps	8.79993e-06	1.86289	0.429	0.101	0.239657
Ap4e1	8.88706e-06	1.42002	0.619	0.213	0.24203
Prr7	8.94186e-06	1.49424	0.714	0.289	0.243522
Gm13199	8.95962e-06	2.6085	0.333	0.076	0.244006
Gm6316	8.99475e-06	4.83877	0.19	0.025	0.244963
Ercc6l	9.16757e-06	3.14599	0.286	0.054	0.24967
Kbtbd6	9.22745e-06	6.28127	0.143	0.015	0.2513
Rbmxl1	9.25524e-06	1.23895	0.429	0.107	0.252057
Rp23-339i6.1	9.30139e-06	4.8932	0.19	0.026	0.253314
Ska2	9.30489e-06	2.64211	0.571	0.211	0.25341
Cenpc1	9.4363e-06	2.72464	0.714	0.37	0.256988
Ctf1	9.52506e-06	1.02123	1	0.817	0.259405
Gm26852	9.54674e-06	1.25476	1	0.919	0.259996
Gpsm2	9.59274e-06	2.07988	0.905	0.702	0.261249
Fam129b	9.62243e-06	1.82827	0.714	0.326	0.262057
H2afv	9.63493e-06	1.9942	0.81	0.499	0.262398
Maz	9.69107e-06	1.45097	0.952	0.861	0.263927
Lbr	1.01603e-05	1.94434	0.905	0.696	0.276706
Msl3l2	1.04852e-05	1.46669	0.952	0.602	0.285554
Gm12328	1.07717e-05	3.07274	0.524	0.154	0.293355
Gm5687	1.15056e-05	4.80711	0.19	0.026	0.313342
Eef1akmt1	1.15318e-05	1.43081	0.952	0.779	0.314058
Tbxas1	1.16305e-05	3.04937	0.333	0.072	0.316746
4932414n04rik	1.19386e-05	4.90861	0.143	0.015	0.325136
Dynlt1a	1.20973e-05	3.09159	0.333	0.074	0.329458
Ndc1	1.22123e-05	3.10711	0.524	0.198	0.332589
Reep4	1.25695e-05	2.76938	0.762	0.457	0.342319
Gm12568	1.26791e-05	4.92894	0.143	0.015	0.345302
Taf1	1.27726e-05	2.31708	0.714	0.332	0.34785
Tmem8b	1.29003e-05	1.75206	0.524	0.164	0.351326
Nup107	1.29531e-05	2.38768	0.619	0.265	0.352763
Gm12395	1.32337e-05	1.7832	0.952	0.745	0.360406
Gins3	1.33228e-05	3.50768	0.381	0.096	0.362833
Phf7	1.36171e-05	2.34245	0.762	0.368	0.370848
Nup37	1.37238e-05	1.95424	0.524	0.178	0.373754
Snord55	1.38725e-05	3.63399	0.143	0.015	0.377803
Gm12356	1.39457e-05	1.43244	0.81	0.398	0.379796
Cep112	1.43838e-05	2.02986	0.571	0.2	0.391727
B3glct	1.43912e-05	1.86495	0.81	0.382	0.39193
Fancb	1.45584e-05	4.16642	0.238	0.041	0.396484
B230377a18rik	1.47506e-05	1.76514	0.429	0.12	0.401718
Ankrd61	1.50927e-05	1.31308	1	0.924	0.411035
Cep41	1.51751e-05	1.91288	0.524	0.178	0.413279
Gm10093	1.52298e-05	2.64005	0.429	0.118	0.414769
Rp24-322e13.1	1.55088e-05	4.94621	0.19	0.027	0.422367
Lmbr1	1.55521e-05	1.37503	1	0.826	0.423547
Pkmyt1	1.56803e-05	2.64886	0.667	0.344	0.427038
Zscan18	1.59763e-05	1.13608	0.714	0.324	0.435098
Xrcc5	1.60316e-05	1.5626	0.429	0.121	0.436606
Rangap1	1.63064e-05	2.33471	0.857	0.566	0.44409
Ttc16	1.63475e-05	1.60225	0.762	0.349	0.445207
Cstf1	1.68284e-05	1.224	0.952	0.547	0.458306
Gm14305	1.69507e-05	1.71563	0.714	0.312	0.461635
Cdc25b	1.69671e-05	2.96446	0.762	0.473	0.462083
Apoc1	1.6985e-05	1.58576	0.571	0.195	0.46257
Gm26938	1.7044e-05	2.24078	0.476	0.151	0.464177
Gm16938	1.73788e-05	2.89964	0.19	0.027	0.473295
Tesmin	1.7474e-05	5.81265	0.095	0.007	0.475888
Ubxn10	1.81174e-05	3.9348	0.238	0.042	0.49341
Trim43c	1.84217e-05	4.90271	0.143	0.016	0.501695
Cntrl	1.84235e-05	1.83941	0.905	0.626	0.501745
Gm8419	1.9388e-05	4.93571	0.095	0.007	0.528014
Zfp455	1.94694e-05	1.65548	0.762	0.462	0.530229
Gm38304	1.99738e-05	2.07578	0.429	0.111	0.543967
Gopc	2.01494e-05	1.03142	1	0.938	0.548749
Gm11659	2.02082e-05	5.38119	0.095	0.007	0.55035
Gm13932	2.02082e-05	5.38364	0.095	0.007	0.55035
Tlr5	2.05434e-05	1.41203	0.476	0.149	0.55948
Rp23-169h9.3	2.05739e-05	1.02923	1	0.946	0.560309
Selenot	2.13516e-05	1.39711	0.857	0.61	0.58149
Gm36401	2.13547e-05	3.42741	0.381	0.097	0.581574
Nkap	2.15008e-05	1.55009	0.286	0.059	0.585552
9330182l06rik	2.22172e-05	4.4616	0.19	0.029	0.605063
Gm29237	2.22629e-05	1.29604	0.714	0.321	0.606307
2310040g07rik	2.25075e-05	4.03561	0.143	0.016	0.612971
Cox11	2.26177e-05	1.03257	1	0.826	0.615969
Ruvbl2	2.27354e-05	1.39843	0.762	0.374	0.619176
Sept10	2.27612e-05	2.18962	0.619	0.263	0.619879
Prdx4	2.2863e-05	2.15695	0.714	0.447	0.622651
Rp23-201d22.4	2.30379e-05	3.21039	0.238	0.041	0.627414
Ttll12	2.32288e-05	1.75679	0.571	0.186	0.632613
A530040e14rik	2.34889e-05	4.63289	0.143	0.016	0.639696
Gm26510	2.34889e-05	5.22053	0.143	0.016	0.639696
Gm16340	2.34962e-05	1.79843	0.905	0.572	0.639896
Hace1	2.35938e-05	1.34487	1	0.919	0.642553
Asxl1	2.39528e-05	1.62037	0.952	0.912	0.652332
Zik1	2.40783e-05	1.42586	0.81	0.435	0.655748
Mcm8	2.46083e-05	1.2212	0.714	0.358	0.670182
Gm37945	2.48608e-05	5.0495	0.143	0.016	0.67706
Gm9864	2.4975e-05	1.5958	0.571	0.206	0.680169
Emx2os	2.5575e-05	4.92381	0.143	0.016	0.696511
Gpr89	2.56147e-05	1.24347	1	0.727	0.69759
2310081o03rik	2.58208e-05	1.24457	0.905	0.551	0.703204
Gm14304	2.59394e-05	5.0366	0.143	0.016	0.706435
Rp2h	2.59979e-05	2.00681	0.476	0.156	0.708027
Atp10a	2.60694e-05	3.47646	0.333	0.081	0.709974
Clspn	2.63751e-05	2.66549	0.238	0.044	0.718299
3010003l21rik	2.71095e-05	2.22228	0.429	0.115	0.738301
Fbln1	0.00639911	3.73033	0.381	0.177	0.748365
Nt5c2	0.0208069	1.31027	0.333	0.147	0.753826
Rcc1	6.37723e-05	2.58084	0.667	0.326	0.754937
6030443j06rik	2.77893e-05	2.80117	0.381	0.1	0.756814
Lig1	0.000820884	2.82433	0.571	0.273	0.759382
Uhrf1	2.81246e-05	2.77728	0.333	0.076	0.765945
Helz2	2.84834e-05	1.65998	0.905	0.629	0.775716
A430106g13rik	2.87974e-05	1.47799	0.667	0.287	0.784269
Mir7036	2.88661e-05	3.13834	0.19	0.028	0.786139
Mcm7	0.00960451	1.12899	0.714	0.396	0.794615
Wdr62	2.92703e-05	2.96431	0.619	0.281	0.797149
Rp23-391p21.2	2.98016e-05	2.42874	0.429	0.127	0.811618
Hat1	0.0742756	1.17776	0.238	0.115	0.825748
Gm7221	3.03823e-05	4.75856	0.143	0.017	0.827431
Pom121	6.60829e-05	2.33246	0.81	0.486	0.832484
Nupl1	0.000175253	1.74772	0.19	0.033	0.836294
Raver1	0.00121622	1.1796	0.952	0.927	0.838267
Rp24-492o4.5	3.08275e-05	2.07602	0.476	0.148	0.839555
Armc1	0.0715825	1.12757	0.524	0.325	0.84294
Rpl36-Ps3	3.13176e-05	3.89953	0.333	0.077	0.852905
Aaas	0.0212967	1.33262	0.381	0.069	0.859266
1700084c06rik	3.15913e-05	1.65754	0.524	0.17	0.860358
Rp23-31j24.2	3.17232e-05	2.86566	0.476	0.145	0.863949
Dnajc9	0.00785222	1.01656	1	0.884	0.864674
Ubr7	0.0657735	1.12272	0.381	0.224	0.874736
Nup133	0.00629591	1.97068	0.667	0.454	0.884629
Gm8337	3.26435e-05	4.52343	0.238	0.044	0.889013
Cse1l	0.0249533	1.3811	0.333	0.219	0.892849
Dnmt1	0.0826829	1.8097	0.286	0.139	0.893572
Bub3	0.00330811	1.03068	0.952	0.748	0.895627
Ap1s2	3.44434e-05	1.91956	0.714	0.315	0.938032
Haus4	0.0978439	1.45663	0.381	0.381	0.942843
Tyms	0.0727309	1.68189	0.286	0.248	0.946383
B930036n10rik	3.48109e-05	2.27706	0.381	0.097	0.948041
E2f8	0.0332979	2.08147	0.238	0.18	0.948392
Anapc1	0.00406223	1.08534	0.81	0.499	0.953821
Slbp	0.000627671	1.13772	0.667	0.362	0.954739
Nasp	0.0642946	1.03825	0.81	0.61	0.956427
Tmem229b	3.51708e-05	1.53211	0.619	0.236	0.957843
Cdk5rap2	3.53285e-05	3.01346	0.524	0.22	0.962137
Fen1	0.0233544	1.81	0.19	0.104	0.964728
Cpxm1	3.59621e-05	1.58824	0.81	0.392	0.979391
Nup85	0.0707607	1.39119	0.248	0.069	0.981573
Pold2	0.0900147	1.07619	0.381	0.413	0.985376
Ctcf	0.0245009	1.03961	0.333	0.24	0.985839

## Sheet: prol Plex2 BEC
Cell Type:	BEC
Dataset:	BECs from embryonic mice			Chen et al. 2024
Comaprison:	Proliferating cluster compared to tall other clusters
Up-regulated								Down-regulated
	p_val	avg_log2FC	pct.1	pct.2	p_val_adj				p_val	avg_log2FC	pct.1	pct.2	p_val_adj
Ube2c	0	2.68922	0.966	0.502	0			Ung	4.69196e-29	-2.02977	0.119	0.291	1.45699e-24
Cenpf	3.99024e-298	2.65111	0.893	0.286	1.23909e-293			Ccl21a	7.14754e-28	-9.38296	0.009	0.135	2.21953e-23
Cks2	1.1976e-246	1.72913	0.972	0.668	3.71891e-242			Mxd4	1.3285e-27	-1.32347	0.271	0.444	4.1254e-23
Ccnb1	9.31093e-246	2.34448	0.84	0.28	2.89132e-241			Pdpn	1.44423e-21	-5.78868	0.005	0.103	4.48478e-17
Nusap1	4.41487e-245	2.67301	0.744	0.172	1.37095e-240			Ptx3	3.35961e-19	-6.24712	0.004	0.091	1.04326e-14
Hmgb2	2.17873e-243	1.26148	0.999	0.9	6.76562e-239			Prox1	2.25146e-18	-3.86636	0.034	0.135	6.99147e-14
Prc1	3.44842e-240	2.62215	0.78	0.221	1.07084e-235			Fos	4.67766e-18	-1.09498	0.436	0.555	1.45255e-13
Cdc20	6.9872e-229	2.11844	0.868	0.328	2.16973e-224			Btg2	4.98485e-18	-1.03653	0.468	0.575	1.54794e-13
Hmmr	9.25566e-222	2.54386	0.73	0.187	2.87416e-217			Cdkn1a	6.67018e-17	-1.43215	0.163	0.293	2.07129e-12
Arl6ip1	4.05903e-219	1.73024	0.973	0.76	1.26045e-214			Lmna	1.22219e-16	-1.07144	0.183	0.317	3.79526e-12
Plk1	1.03984e-216	2.6207	0.697	0.17	3.22902e-212			Reln	1.18677e-15	-4.20326	0.012	0.089	3.68528e-11
Aurka	4.50144e-214	2.70558	0.663	0.153	1.39783e-209			Scn1b	3.36395e-15	-1.52293	0.118	0.232	1.04461e-10
Cdca8	5.8997e-214	1.76557	0.922	0.45	1.83203e-209			Fbln5	4.02632e-15	-2.65154	0.025	0.11	1.25029e-10
Cdk1	3.4186e-213	1.81231	0.928	0.581	1.06158e-208			Timp2	2.89951e-14	-1.87972	0.101	0.205	9.00385e-10
H2afx	1.60486e-212	1.58669	0.963	0.658	4.98356e-208			Slc45a3	1.62584e-13	-5.32563	0.002	0.061	5.04871e-09
Birc5	6.38711e-211	1.47896	0.972	0.594	1.98339e-206			Sgk3	1.15771e-12	-1.87892	0.093	0.186	3.59503e-08
Top2a	4.39173e-209	1.78054	0.917	0.454	1.36376e-204			Lgals9	3.68974e-12	-1.04023	0.166	0.276	1.14577e-07
Cenpe	2.90782e-200	2.16972	0.813	0.301	9.02965e-196			Fam174b	4.52198e-12	-1.40849	0.134	0.232	1.40421e-07
Tpx2	8.28412e-200	1.85764	0.852	0.35	2.57247e-195			Scn3a	7.79552e-11	-4.12588	0.005	0.056	2.42074e-06
Pimreg	9.10934e-198	2.12266	0.796	0.282	2.82872e-193			Thy1	9.63912e-11	-2.90527	0.015	0.073	2.99324e-06
Cenpa	2.64759e-186	1.49242	0.939	0.539	8.22155e-182			Fibin	1.06719e-10	-5.67864	0.003	0.051	3.31395e-06
Mki67	1.05885e-182	1.87134	0.837	0.334	3.28806e-178			Apba2	1.28655e-10	-3.9268	0.004	0.053	3.99512e-06
Ube2s	1.3628e-171	1.18181	0.974	0.811	4.2319e-167			Prkcz	1.44158e-10	-2.45863	0.023	0.084	4.47655e-06
Kif20b	1.26247e-158	2.11094	0.668	0.206	3.92034e-154			Prss23	1.65566e-10	-1.32887	0.187	0.28	5.14132e-06
Mis18bp1	1.58117e-158	2.30098	0.602	0.16	4.90999e-154			Hspb1	1.87081e-10	-1.18801	0.157	0.254	5.80943e-06
Aurkb	6.93203e-157	1.91765	0.709	0.247	2.1526e-152			Lbp	2.32166e-10	-1.36057	0.187	0.278	7.20945e-06
Ccna2	7.18822e-154	1.63073	0.822	0.379	2.23216e-149			Nts	3.83683e-10	-2.59861	0.06	0.131	1.19145e-05
Kif23	6.90791e-153	2.21316	0.63	0.186	2.14511e-148			E2f1	4.08193e-10	-1.02048	0.132	0.224	1.26756e-05
Tubb4b	1.01941e-150	1.17638	0.963	0.78	3.16556e-146			Ctgf	5.68509e-10	-1.47907	0.129	0.215	1.76539e-05
Jpt1	6.38696e-147	1.01941	0.966	0.856	1.98334e-142			Cxadr	1.0884e-09	-3.1869	0.005	0.051	3.3798e-05
Kif22	8.49703e-144	1.95216	0.654	0.213	2.63858e-139			Pard6g	1.26075e-09	-2.78805	0.024	0.081	3.91502e-05
Spc25	3.29326e-143	1.78422	0.712	0.26	1.02266e-138			Pdlim4	1.70526e-09	-2.30107	0.038	0.101	5.29535e-05
Cdca3	5.14376e-140	1.67928	0.745	0.297	1.59729e-135			Fcgrt	3.24427e-09	-1.18265	0.118	0.199	0.000100744
Aspm	5.34264e-136	2.50055	0.467	0.096	1.65905e-131			Celsr1	6.10692e-09	-1.15624	0.031	0.089	0.000189638
Ckap2l	5.19388e-134	1.95182	0.573	0.163	1.61285e-129			Pgm5	6.22883e-09	-2.33597	0.017	0.068	0.000193424
Sgo2a	3.25588e-130	2.14463	0.575	0.176	1.01105e-125			Trp53inp1	6.48895e-09	-1.81266	0.05	0.114	0.000201501
Incenp	2.26653e-129	1.79853	0.666	0.242	7.03825e-125			Cthrc1	9.37589e-09	-1.30359	0.109	0.187	0.00029115
Smc2	1.84049e-128	1.14192	0.926	0.605	5.71527e-124			Tnfrsf11a	1.36228e-08	-2.78973	0.008	0.049	0.000423029
Kif11	1.4711e-125	2.05288	0.555	0.163	4.56821e-121			Meox1	1.42741e-08	-1.07424	0.132	0.213	0.000443254
Smc4	6.39455e-124	1.11919	0.932	0.642	1.9857e-119			Cldn11	1.84633e-08	-5.00326	0.003	0.04	0.000573342
Tacc3	6.08431e-123	1.61715	0.714	0.302	1.88936e-118			Kbtbd11	1.85126e-08	-1.87936	0.039	0.097	0.000574871
Kif2c	2.90246e-122	2.3204	0.481	0.119	9.01301e-118			Angpt2	3.39892e-08	-1.32073	0.031	0.086	0.00105547
Kpna2	2.9813e-112	2.28839	0.478	0.13	9.25782e-108			Cpne8	3.92375e-08	-1.07637	0.103	0.178	0.00121844
Bub3	3.67297e-112	1.07822	0.909	0.689	1.14057e-107			Rnase4	5.99598e-08	-1.44683	0.083	0.15	0.00186193
Depdc1a	8.02159e-112	2.33337	0.457	0.118	2.49094e-107			Pdcd4	6.28537e-08	-1.11586	0.128	0.202	0.0019518
Tuba1c	7.8158e-110	2.0177	0.536	0.172	2.42704e-105			Klf4	6.30996e-08	-1.03999	0.251	0.328	0.00195943
Knl1	1.32111e-108	1.99973	0.51	0.153	4.10245e-104			Tfeb	9.88974e-08	-1.59995	0.023	0.071	0.00307106
Dbf4	2.37895e-107	1.43435	0.735	0.349	7.38734e-103			Gsdmd	1.34482e-07	-1.79201	0.022	0.068	0.00417606
Racgap1	3.13867e-103	1.55011	0.66	0.28	9.74651e-99			Plce1	1.87891e-07	-4.27064	0.002	0.033	0.00583459
Bub1	3.41878e-101	1.76121	0.548	0.19	1.06163e-96			Tnc	1.91302e-07	-2.38546	0.012	0.051	0.00594051
Fzr1	4.92109e-101	1.81429	0.536	0.183	1.52815e-96			Prkcq	1.92894e-07	-1.79954	0.011	0.05	0.00598994
Ccnf	1.4289e-97	2.30526	0.381	0.087	4.43715e-93			Sema3d	2.02138e-07	-1.88449	0.005	0.04	0.006277
Sgo1	2.3126e-97	2.04591	0.438	0.121	7.18131e-93			Olfml2a	2.14611e-07	-2.70799	0.01	0.048	0.00666432
Fam83d	2.87116e-97	2.63688	0.355	0.076	8.91583e-93			Dcxr	2.38295e-07	-1.77993	0.061	0.118	0.00739978
Cdca2	1.17009e-96	2.19514	0.414	0.107	3.63348e-92			Plcd1	2.42206e-07	-1.74098	0.03	0.079	0.00752122
Pttg1	1.02138e-94	1.36012	0.764	0.406	3.17169e-90			Irf1	2.8583e-07	-1.10191	0.098	0.164	0.00887588
Kif20a	1.33429e-93	1.83599	0.465	0.14	4.14338e-89			Fgl2	3.32293e-07	-4.51528	0.008	0.043	0.0103187
Sapcd2	1.64899e-89	2.64112	0.3	0.053	5.12062e-85			Adamtsl1	3.75893e-07	-2.77479	0.008	0.043	0.0116726
Ccnb2	8.01329e-88	1.24835	0.735	0.381	2.48837e-83			Fbxl20	4.40107e-07	-1.40052	0.045	0.097	0.0136666
Ncapg	8.61038e-88	1.70343	0.539	0.205	2.67378e-83			Ltbp4	6.51718e-07	-1.70635	0.041	0.092	0.0202378
Bora	4.00686e-87	1.57114	0.573	0.231	1.24425e-82			Mustn1	6.69015e-07	-1.61271	0.035	0.083	0.0207749
Nuf2	1.91496e-86	1.68819	0.489	0.165	5.94653e-82			Ccl2	6.93226e-07	-2.28347	0.06	0.115	0.0215267
Ckap5	4.44209e-86	1.39026	0.675	0.338	1.3794e-81			Pgf	9.40116e-07	-1.84258	0.017	0.057	0.0291934
Anln	3.11088e-84	1.76631	0.476	0.165	9.6602e-80			Ccne2	9.90512e-07	-1.2029	0.112	0.174	0.0307584
Ndc80	5.23838e-79	1.70988	0.434	0.139	1.62668e-74			Rassf9	9.95809e-07	-1.75325	0.036	0.083	0.0309229
Bub1b	6.84463e-75	1.56121	0.484	0.181	2.12546e-70			Tcp11l2	1.2537e-06	-1.46094	0.038	0.086	0.0389311
Kif4	5.70808e-74	1.6089	0.426	0.139	1.77253e-69			Grina	1.39226e-06	-1.29056	0.074	0.13	0.0432337
Spc24	8.28102e-74	1.03867	0.767	0.438	2.57151e-69			Gdf15	1.59228e-06	-4.29026	0.001	0.027	0.049445
Cdkn3	1.1479e-73	1.64143	0.442	0.153	3.56456e-69			Pcsk6	1.64507e-06	-1.38476	0.049	0.099	0.0510844
Dlgap5	3.20202e-72	1.73637	0.405	0.131	9.94322e-68			Sh3gl3	1.72428e-06	-1.69445	0.038	0.085	0.053544
Pif1	3.672e-72	3.39526	0.179	0.017	1.14027e-67			Neat1	1.81445e-06	-1.48279	0.045	0.093	0.0563441
Knstrn	2.27867e-68	1.31654	0.535	0.236	7.07595e-64			Tmem86a	2.36389e-06	-1.02926	0.104	0.165	0.073406
Cenpl	3.11564e-68	2.20545	0.288	0.068	9.67498e-64			Hivep3	2.6265e-06	-1.68139	0.033	0.076	0.0815606
Rangap1	3.4666e-68	1.08541	0.721	0.403	1.07648e-63			Edn1	2.62884e-06	-1.18476	0.112	0.172	0.0816335
Ska1	6.28051e-68	1.58997	0.446	0.167	1.95029e-63			Synpo	3.8445e-06	-1.86943	0.015	0.05	0.119383
Shcbp1	1.03088e-67	1.44628	0.498	0.203	3.20119e-63			Fam189a2	3.94144e-06	-1.45724	0.035	0.079	0.122393
Reep4	1.19969e-67	1.85383	0.376	0.119	3.72539e-63			Aig1	4.4886e-06	-1.09681	0.126	0.185	0.139384
Kif18a	1.57471e-67	2.27909	0.27	0.06	4.88996e-63			March11.	4.802e-06	-3.49238	0.002	0.027	0.149117
C330027C09Rik	1.02737e-65	1.69889	0.414	0.149	3.19029e-61			Gsap	5.13635e-06	-1.7097	0.025	0.064	0.159499
Gas2l3	1.09685e-65	1.94565	0.333	0.096	3.40606e-61			Gprc5b	5.59039e-06	-1.15746	0.071	0.123	0.173598
Kif15	1.75627e-64	1.35479	0.519	0.227	5.45374e-60			Ddit4	6.3711e-06	-1.2568	0.072	0.124	0.197842
Ckap2	3.41127e-64	1.5265	0.47	0.193	1.0593e-59			Tapbp	7.27545e-06	-1.11784	0.068	0.119	0.225925
Arhgap11a	2.09504e-63	1.85831	0.344	0.105	6.50573e-59			Dmtn	8.86596e-06	-1.09589	0.091	0.146	0.275315
Plk4	3.7776e-63	1.20919	0.548	0.249	1.17306e-58			Hist1h2bc	9.55068e-06	-1.03465	0.165	0.225	0.296577
Ect2	9.97936e-62	2.03591	0.299	0.082	3.09889e-57			Maf	9.59655e-06	-1.33077	0.114	0.17	0.298002
Cdc25c	1.78705e-61	1.72866	0.313	0.088	5.54931e-57			Rtkn	9.6734e-06	-1.02851	0.164	0.221	0.300388
Spdl1	2.34019e-60	1.75556	0.337	0.106	7.26699e-56			Lyve1	1.09072e-05	-2.08563	0.077	0.128	0.338701
Cep55	1.16168e-59	1.77018	0.351	0.116	3.60735e-55			Lck	1.36059e-05	-1.02069	0.086	0.139	0.422505
Ttk	1.67389e-59	1.6622	0.358	0.119	5.19792e-55			Fam131a	1.3692e-05	-1.47391	0.016	0.049	0.425178
Hapln1	2.68862e-59	1.62245	0.537	0.28	8.34896e-55			Clca3a1	1.46758e-05	-1.97203	0.026	0.063	0.455729
Arhgap19	2.79429e-59	2.1133	0.255	0.061	8.67712e-55			Ctnnal1	2.52415e-05	-1.27588	0.039	0.08	0.783824
Trim59	8.05047e-59	1.50362	0.408	0.154	2.49991e-54			Phldb3	2.6293e-05	-4.01337	0.001	0.021	0.816477
Troap	8.18676e-59	2.5183	0.211	0.039	2.54224e-54
Rnf26	3.00494e-58	1.37546	0.445	0.181	9.33124e-54
G2e3	5.03314e-58	1.71163	0.365	0.126	1.56294e-53
Melk	5.0641e-56	1.50896	0.376	0.135	1.57255e-51
Pbk	1.04914e-55	1.33246	0.472	0.204	3.25791e-51
Hba-x	4.23929e-55	1.50837	0.407	0.165	1.31643e-50
Gm49359	2.18126e-53	1.65044	0.316	0.102	6.77347e-49
Nde1	6.18876e-53	1.06765	0.59	0.311	1.9218e-48
Nek2	8.48376e-53	2.538	0.213	0.047	2.63446e-48
Espl1	3.09373e-52	1.85466	0.256	0.069	9.60695e-48
Hjurp	7.14714e-50	1.12112	0.557	0.292	2.2194e-45
Trip13	5.51729e-48	1.18654	0.473	0.225	1.71328e-43
Hbb-bh1	5.94889e-47	1.43312	0.273	0.083	1.84731e-42
Etv2	1.02524e-46	2.88514	0.167	0.031	3.18368e-42
Cdc25b	1.11947e-46	2.79151	0.166	0.031	3.4763e-42
Psrc1	2.91439e-46	1.39292	0.29	0.094	9.05005e-42
Prtg	1.02316e-45	1.64109	0.292	0.099	3.17721e-41
Ska3	2.29313e-45	1.7967	0.26	0.08	7.12086e-41
Nup37	2.90714e-45	1.16145	0.458	0.218	9.02755e-41
Terf1	9.79861e-43	1.23141	0.448	0.219	3.04276e-38
Mxd3	3.37085e-42	1.84839	0.268	0.092	1.04675e-37
Parpbp	1.84516e-41	2.34204	0.164	0.034	5.72977e-37
Ncapd2	2.73831e-41	1.2385	0.369	0.158	8.50328e-37
Miip	8.27051e-41	1.40252	0.255	0.082	2.56824e-36
Depdc1b	2.33036e-40	2.83015	0.138	0.024	7.23647e-36
Prr11	2.41861e-38	2.1489	0.162	0.036	7.51052e-34
Cdkn2d	3.5556e-38	1.133	0.446	0.23	1.10412e-33
Spag5	5.19733e-38	1.57776	0.243	0.081	1.61393e-33
Kifc1	5.57863e-38	1.93151	0.205	0.059	1.73233e-33
Cenpn	6.71385e-38	1.19413	0.35	0.151	2.08485e-33
Hyls1	2.07435e-36	2.70728	0.131	0.024	6.44148e-32
Ifitm1	2.88593e-36	2.08393	0.182	0.05	8.96168e-32
Mphosph9	3.00264e-36	1.44327	0.296	0.12	9.3241e-32
Arhgef39	1.15022e-35	2.49377	0.126	0.022	3.57176e-31
Ccdc18	1.61734e-34	1.71433	0.195	0.058	5.02232e-30
Lockd	4.54033e-34	1.5356	0.294	0.124	1.40991e-29
Spag7	6.80799e-34	1.14099	0.358	0.168	2.11409e-29
Fbxo5	4.82272e-33	1.10927	0.395	0.198	1.4976e-28
Slc16a3	7.97842e-33	1.20796	0.338	0.156	2.47754e-28
Ncaph	1.62259e-32	1.13641	0.355	0.169	5.03863e-28
Emb	1.77524e-32	1.12708	0.219	0.073	5.51265e-28
Kif14	6.99484e-32	2.43418	0.119	0.023	2.17211e-27
Clec1b	1.18947e-31	1.36522	0.326	0.151	3.69365e-27
Crabp1	4.53615e-31	1.81383	0.18	0.055	1.40861e-26
Sall4	5.79114e-30	2.19901	0.107	0.019	1.79832e-25
AC160336.1	7.62998e-30	1.19662	0.62	0.464	2.36934e-25
Hmga1	1.71501e-29	1.11299	0.302	0.137	5.32562e-25
Hbb-y	1.27109e-28	1.26345	0.621	0.397	3.94713e-24
Nup35	1.64971e-28	1.08974	0.364	0.188	5.12283e-24
Lin28a	2.15262e-28	1.64902	0.128	0.03	6.68452e-24
Diaph3	2.42551e-28	1.24573	0.277	0.121	7.53193e-24
Cep89	3.97438e-28	1.33337	0.214	0.08	1.23416e-23
Mastl	8.15145e-28	1.48609	0.197	0.069	2.53127e-23
Ube2t	1.15958e-27	1.08913	0.301	0.137	3.60085e-23
Cit	7.58112e-27	1.04529	0.357	0.186	2.35417e-22
Lrp11	1.12725e-26	1.47849	0.186	0.065	3.50046e-22
D030007L05Rik	1.25785e-26	1.03787	0.52	0.338	3.90599e-22
Twist1	2.20756e-26	1.5699	0.153	0.046	6.85515e-22
Zwilch	2.85101e-26	1.21227	0.241	0.101	8.85324e-22
Slc2a3	3.26846e-26	1.59658	0.138	0.038	1.01495e-21
Bnip3	7.6392e-26	1.40601	0.25	0.11	2.3722e-21
Cenpp	2.40551e-25	1.00741	0.313	0.154	7.46984e-21
Eme1	2.6517e-25	1.22586	0.221	0.09	8.23433e-21
Ankle1	3.58407e-25	2.0564	0.123	0.032	1.11296e-20
Gpc3	6.13941e-25	1.35145	0.161	0.052	1.90647e-20
Esco2	6.60089e-25	1.11556	0.281	0.131	2.04977e-20
Pmp22	3.9107e-24	1.11492	0.383	0.225	1.21439e-19
Dlk1	2.31379e-23	1.24196	0.162	0.056	7.185e-19
Tiam1	1.90982e-22	1.15421	0.249	0.116	5.93056e-18
Fzd2	2.23614e-22	2.10413	0.081	0.015	6.94387e-18
B230312C02Rik	2.94708e-21	1.59361	0.102	0.026	9.15156e-17
Tspan8	3.52095e-21	1.47403	0.11	0.03	1.09336e-16
Trim71	4.16675e-21	1.1815	0.206	0.089	1.2939e-16
Iqgap3	1.75632e-20	1.50863	0.159	0.06	5.45391e-16
Bex4	2.48689e-20	1.06611	0.337	0.197	7.72254e-16
Stk17b	3.29832e-20	1.33574	0.141	0.049	1.02423e-15
Pak4	4.12136e-20	1.00046	0.254	0.125	1.27981e-15
Haspin	4.15198e-20	1.15504	0.197	0.084	1.28932e-15
Rab34	1.23971e-19	1.34237	0.16	0.062	3.84966e-15
Cep70	1.39485e-19	1.27102	0.186	0.078	4.33142e-15
Aunip	1.82158e-19	1.0377	0.2	0.088	5.65654e-15
Foxm1	5.98479e-19	1.13083	0.207	0.095	1.85846e-14
Fgf8	6.97134e-19	2.68842	0.048	0.005	2.16481e-14
Papd7	7.32308e-19	1.16914	0.2	0.09	2.27404e-14
Cdkn2c	1.56109e-18	1.81219	0.123	0.041	4.84767e-14
Krt8	1.72625e-18	2.17317	0.058	0.009	5.36052e-14
Mirg	2.9779e-18	2.08619	0.066	0.013	9.24728e-14
Hoxb2	1.99859e-17	1.02401	0.207	0.099	6.20622e-13
Car14	3.72554e-17	1.8933	0.074	0.017	1.15689e-12
Hoxb5	3.88277e-17	1.10971	0.157	0.065	1.20572e-12
Kif18b	4.48966e-17	2.37501	0.088	0.025	1.39417e-12
Oip5	6.62514e-17	1.2933	0.153	0.064	2.0573e-12
Ccsap	7.04831e-17	1.58934	0.119	0.042	2.18871e-12
2700046A07Rik	1.37335e-16	1.75147	0.078	0.02	4.26467e-12
Mdm1	1.38462e-16	1.32075	0.148	0.061	4.29965e-12
Cenpi	1.66616e-16	1.11736	0.152	0.063	5.17392e-12
Neil3	3.30441e-16	1.14012	0.207	0.104	1.02612e-11
Plpp7	1.71974e-15	1.55146	0.086	0.025	5.34031e-11
Dnph1	5.75534e-15	1.09182	0.169	0.078	1.7872e-10
Rrp12	6.99966e-15	1.01918	0.156	0.069	2.1736e-10
Stil	1.62865e-14	1.01762	0.139	0.058	5.05744e-10
Bmpr1a	2.45293e-14	1.61785	0.077	0.022	7.6171e-10
Gm42047	2.81165e-14	1.74009	0.068	0.018	8.73102e-10
Rbpms2	1.06764e-13	1.0072	0.142	0.063	3.31535e-09
Hey1	1.38419e-13	1.09486	0.202	0.108	4.29831e-09
Eno3	2.38208e-13	1.29397	0.08	0.025	7.39707e-09
Cadm1	8.74309e-13	1.62649	0.079	0.026	2.71499e-08
Mmp9	1.40228e-12	2.28336	0.042	0.008	4.35451e-08
Pde5a	1.6479e-12	1.62381	0.062	0.017	5.11723e-08
Gm38037	3.0189e-12	2.7881	0.042	0.008	9.3746e-08
Wfdc2	3.92863e-12	1.75337	0.061	0.017	1.21996e-07
Scd1	4.86276e-12	2.08418	0.046	0.01	1.51003e-07
Ndufa4l2	5.36956e-12	1.80046	0.084	0.03	1.66741e-07
Nsl1	5.50031e-12	1.07837	0.122	0.053	1.70801e-07
Kifc5b	5.55497e-12	1.43748	0.06	0.016	1.72498e-07
Gprc5a	5.93927e-12	1.47468	0.078	0.027	1.84432e-07
Gpc6	6.82134e-12	1.91234	0.039	0.007	2.11823e-07
Gm36503	7.09847e-12	1.44965	0.064	0.019	2.20429e-07
Prrx2	7.19679e-12	1.78417	0.074	0.024	2.23482e-07
Gm10184	8.59425e-12	1.97759	0.047	0.01	2.66877e-07
Gm45889	1.22266e-11	2.94952	0.026	0.002	3.79673e-07
Krt18	1.3926e-11	1.85007	0.051	0.013	4.32445e-07
Rtkn2	1.49478e-11	3.22937	0.029	0.003	4.64173e-07
Ptprn	1.92366e-11	1.92176	0.039	0.007	5.97354e-07
Phlda2	3.67086e-11	1.44647	0.04	0.008	1.13991e-06
Foxf1	1.02131e-10	1.531	0.064	0.021	3.17148e-06
Fam72a	1.21675e-10	1.09455	0.113	0.051	3.77837e-06
Gm3550	1.5992e-10	1.61618	0.083	0.032	4.96601e-06
Was	6.55359e-10	2.41882	0.028	0.004	2.03509e-05
Tinf2	6.78275e-10	1.0165	0.134	0.067	2.10625e-05
Gm3839	9.48651e-10	1.26976	0.051	0.015	2.94585e-05
Grm6	9.58563e-10	2.47683	0.033	0.006	2.97662e-05
Tnnt3	1.31712e-09	1.46072	0.042	0.011	4.09006e-05
Gypa	1.49578e-09	2.26133	0.03	0.005	4.64483e-05
Fev	1.49855e-09	1.28811	0.055	0.018	4.65345e-05
Efcab11	1.78162e-09	1.13984	0.092	0.04	5.53246e-05
Hoxb5os	1.91941e-09	2.52807	0.034	0.007	5.96033e-05
Sun2	2.45366e-09	1.01313	0.137	0.072	7.61935e-05
Fjx1	2.89733e-09	1.06974	0.083	0.034	8.99709e-05
Uevld	3.46739e-09	1.10014	0.096	0.043	0.000107673
Fam169a	3.86758e-09	1.46326	0.05	0.015	0.0001201
Meis1	4.15273e-09	1.07056	0.084	0.035	0.000128955
Sall3	4.38816e-09	1.38801	0.05	0.015	0.000136266
Naaa	5.10923e-09	1.27439	0.051	0.016	0.000158657
Cox4i2	5.72007e-09	1.40209	0.045	0.013	0.000177625
Actg2	6.77608e-09	2.15028	0.027	0.005	0.000210418
Hist1h3c	6.79255e-09	1.0123	0.118	0.06	0.000210929
Mmp17	6.94978e-09	2.2073	0.027	0.005	0.000215812
Hist2h2ac	8.77644e-09	1.43259	0.085	0.037	0.000272535
Polq	1.12144e-08	1.18224	0.068	0.027	0.000348242
Gm14091	1.20471e-08	2.1018	0.029	0.006	0.000374097
Sall1	1.24606e-08	1.51184	0.037	0.009	0.000386938
Poc5	1.36366e-08	1.11261	0.121	0.063	0.000423456
Tubd1	1.3687e-08	1.03383	0.08	0.034	0.000425022
Sorcs2	1.38575e-08	1.08275	0.059	0.021	0.000430317
Cpa2	2.43421e-08	1.22315	0.086	0.039	0.000755894
Hoxb6	2.9999e-08	1.45589	0.063	0.024	0.000931559
Gldc	3.52553e-08	1.68118	0.045	0.014	0.00109478
Ninl	5.17903e-08	1.4533	0.039	0.011	0.00160824
Tnnt2	5.63308e-08	1.4556	0.066	0.027	0.00174924
Mtfr2	6.57386e-08	1.15718	0.069	0.029	0.00204138
Tcf7	8.80267e-08	1.03773	0.083	0.038	0.00273349
Rab3b	8.90677e-08	1.58453	0.043	0.014	0.00276582
Rbp4	8.92486e-08	1.61891	0.031	0.008	0.00277144
Shisa9	9.35978e-08	1.92295	0.028	0.006	0.00290649
Fut10	9.87591e-08	1.28065	0.058	0.022	0.00306676
Sema3g	1.02257e-07	1.06936	0.073	0.032	0.00317539
Speg	1.06118e-07	2.07554	0.031	0.008	0.00329529
Gm26737	1.16835e-07	1.6623	0.054	0.02	0.00362807
Isl1	1.30394e-07	1.0334	0.045	0.014	0.00404913
Aplf	1.43564e-07	1.0732	0.083	0.038	0.00445808
Acta2	1.45358e-07	1.15431	0.061	0.024	0.00451381
Snhg11	1.48174e-07	2.04562	0.026	0.005	0.00460123
Cep128	1.70258e-07	1.27304	0.09	0.044	0.00528702
Greb1	2.02671e-07	1.35157	0.048	0.017	0.00629354
Hist1h2bb	2.34943e-07	1.38764	0.04	0.013	0.00729568
Kank1	2.37502e-07	1.09363	0.056	0.022	0.00737514
H2-Ab1	3.07743e-07	1.5732	0.037	0.011	0.00955633
Unc5c	3.94563e-07	1.20145	0.042	0.014	0.0122524
Efs	5.38037e-07	1.96102	0.03	0.008	0.0167077
2010110K18Rik	5.55899e-07	1.72144	0.03	0.008	0.0172623
Fanci	6.32859e-07	1.22794	0.06	0.025	0.0196522
Vill	7.27524e-07	1.0692	0.046	0.016	0.0225918
Steap1	7.80906e-07	1.89036	0.026	0.006	0.0242495
Thsd4	8.83045e-07	1.25703	0.041	0.014	0.0274212
Hist2h2bb	1.18814e-06	1.24215	0.051	0.02	0.0368952
Grip1	1.33969e-06	1.83684	0.036	0.011	0.0416012
Gm45184	1.63529e-06	1.26499	0.05	0.02	0.0507807
Fancd2	1.63798e-06	1.06652	0.077	0.038	0.0508642
Hopx	2.07517e-06	2.06386	0.042	0.016	0.0644404
Pth1r	2.24342e-06	1.29471	0.046	0.018	0.0696651
Hoxa1	2.42722e-06	1.20479	0.058	0.025	0.0753723
Hist1h2bm	3.19748e-06	1.04402	0.062	0.028	0.0992912
Csn3	4.07484e-06	1.06051	0.046	0.018	0.126536
Hist1h3e	5.57527e-06	1.00068	0.072	0.036	0.173129
Zfp128	7.26637e-06	1.20816	0.026	0.007	0.225643
Pcsk1n	7.34876e-06	1.24636	0.04	0.015	0.228201
Tsga10	9.11282e-06	1.2587	0.055	0.025	0.28298
Dnah8	1.04999e-05	1.08116	0.038	0.014	0.326055
Arhgdig	1.28855e-05	1.02625	0.046	0.019	0.400132
Gpm6b	1.37187e-05	1.08169	0.052	0.023	0.426008
Meis3	2.39253e-05	1.49389	0.028	0.009	0.742951

## Sheet: retinal Prol BEC
Cell Type:	BEC
Dataset:	BECs from mice retina			Chavkin et al. 2022
Comaprison:	Proliferating cluster compared to tall other clusters
Up-regulated								Down-regulated
	p_val	avg_log2FC	pct.1	pct.2	p_val_adj				p_val	avg_log2FC	pct.1	pct.2	p_val_adj
Ccna2	1.06497e-231	4.49548	0.748	0.055	1.77659e-227			Apod	1.73e-17	-1.76423	0.315	0.567	2.88e-13
Pclaf	5.09705e-221	4.07262	0.933	0.128	8.5029e-217
Birc5	3.25818e-213	3.99979	0.861	0.106	5.43529e-209
Cdca8	2.67766e-211	4.21323	0.773	0.075	4.46688e-207
Ckap2	6.97622e-204	4.97062	0.58	0.03	1.16377e-199
Pimreg	2.16478e-195	4.70747	0.609	0.04	3.61128e-191
Tpx2	1.38289e-194	4.41516	0.651	0.05	2.30693e-190
Ccnb1	4.71054e-193	4.63428	0.639	0.047	7.85812e-189
Pbk	1.7825e-188	4.28579	0.634	0.048	2.97357e-184
Cenpf	6.08901e-187	4.70976	0.538	0.028	1.01577e-182
Plk1	2.02221e-186	4.57483	0.559	0.032	3.37345e-182
Top2a	1.15499e-183	4.40358	0.773	0.1	1.92676e-179
Hmmr	7.78357e-177	5.39197	0.433	0.013	1.29845e-172
Cdc20	5.5026e-176	4.64907	0.668	0.067	9.17943e-172
Ube2c	8.72184e-174	4.05554	0.714	0.081	1.45498e-169
Knl1	4.30185e-173	5.15808	0.437	0.015	7.17634e-169
Cenpe	1.38525e-172	5.20967	0.483	0.023	2.31087e-168
Spc24	1.79369e-172	3.78336	0.714	0.081	2.99223e-168
Mki67	6.84969e-166	4.27158	0.546	0.038	1.14266e-161
Shcbp1	3.98346e-160	4.53589	0.458	0.022	6.64521e-156
Aurkb	1.19032e-159	4.42736	0.55	0.043	1.98568e-155
Cks2	7.88665e-159	3.73294	0.853	0.169	1.31565e-154
Bub1	2.97603e-157	5.00603	0.408	0.015	4.9646e-153
Lockd	3.29079e-157	3.88411	0.592	0.053	5.48969e-153
Nusap1	7.49034e-157	4.82291	0.567	0.05	1.24954e-152
Cdca3	4.20341e-155	3.88029	0.613	0.062	7.01212e-151
Tk1	1.32198e-154	3.67376	0.727	0.101	2.20533e-150
Nuf2	2.22864e-152	4.86428	0.42	0.019	3.71781e-148
Mis18bp1	1.46457e-142	4.92743	0.374	0.014	2.4432e-138
Kif22	2.23752e-141	3.6624	0.672	0.094	3.73263e-137
Sgo1	3.70337e-140	4.60755	0.399	0.019	6.17796e-136
Ccnb2	1.3171e-139	3.86216	0.63	0.08	2.19718e-135
Kif2c	3.19037e-139	4.96984	0.382	0.017	5.32217e-135
Cenpa	6.45485e-138	3.89274	0.689	0.107	1.0768e-133
Hmgb2	3.17536e-134	3.33115	0.983	0.5	5.29713e-130
Rrm2	1.05375e-133	3.80808	0.63	0.084	1.75786e-129
Neil3	2.9992e-130	4.8005	0.37	0.017	5.00326e-126
Smc2	5.03926e-130	3.38337	0.756	0.151	8.40649e-126
Cdca2	6.63234e-129	4.73358	0.387	0.021	1.10641e-124
Kif20b	1.71624e-125	4.32427	0.42	0.029	2.86303e-121
Knstrn	2.38037e-125	3.87788	0.538	0.06	3.97093e-121
Cdk1	6.81396e-125	3.26339	0.819	0.2	1.1367e-120
Cks1b	7.46471e-125	2.94627	0.874	0.236	1.24526e-120
Tacc3	8.75085e-122	3.54316	0.534	0.06	1.45982e-117
Lmnb1	1.02808e-121	2.93234	0.878	0.257	1.71504e-117
Mad2l1	1.15758e-121	3.48706	0.592	0.08	1.93107e-117
Fbxo5	2.75768e-121	4.24806	0.437	0.035	4.60036e-117
Melk	1.33992e-120	4.35253	0.374	0.021	2.23525e-116
Tyms	3.60257e-120	3.08085	0.769	0.168	6.0098e-116
Kif23	2.17675e-115	3.69137	0.555	0.073	3.63126e-111
Prc1	7.54548e-114	4.12145	0.399	0.03	1.25874e-109
Tuba1b	8.1464e-112	2.55431	0.996	0.725	1.35898e-107
Cenpw	3.64803e-109	3.06334	0.63	0.108	6.08564e-105
Mxd3	1.2995e-108	4.19365	0.357	0.023	2.16783e-104
Asf1b	5.53848e-107	3.75424	0.424	0.039	9.23929e-103
H2ax	2.45685e-103	2.95411	0.786	0.222	4.09851e-99
Stmn1	1.77175e-102	2.36806	0.975	0.642	2.95563e-98
Ttk	5.52378e-102	4.468	0.311	0.017	9.21477e-98
Sapcd2	8.76813e-101	5.39479	0.235	0.006	1.4627e-96
Bub1b	2.35791e-100	3.88784	0.382	0.033	3.93347e-96
Cip2a	2.37694e-100	4.1171	0.315	0.018	3.96522e-96
H2az1	4.27681e-98	2.15332	0.983	0.672	7.13458e-94
Trip13	2.94482e-95	3.91331	0.361	0.031	4.91254e-91
Trim59	3.32069e-94	3.50322	0.42	0.047	5.53958e-90
Tmpo	5.94359e-93	2.57234	0.861	0.344	9.9151e-89
Ccdc34	5.0173e-92	2.62717	0.735	0.198	8.36987e-88
Tubb4b	1.96415e-91	2.52987	0.882	0.373	3.27659e-87
Smc4	1.27293e-90	2.65053	0.819	0.281	2.1235e-86
Selenoh	1.33902e-88	2.15944	0.941	0.484	2.23376e-84
Lig1	7.04273e-87	3.12547	0.576	0.114	1.17487e-82
Nrm	1.11017e-86	3.16252	0.529	0.092	1.85199e-82
Ran	6.24926e-86	1.90771	0.983	0.718	1.0425e-81
Hmgn2	2.10905e-85	2.35636	0.828	0.299	3.51832e-81
Rrm1	2.18919e-83	2.77344	0.664	0.173	3.652e-79
Hmgb1	3.33166e-81	1.66853	0.987	0.84	5.55787e-77
Dnajc9	3.01146e-79	2.82637	0.592	0.133	5.02372e-75
Nucks1	9.0992e-79	2.38911	0.798	0.309	1.51793e-74
Plk4	1.02093e-78	3.28818	0.374	0.044	1.70311e-74
Anp32e	1.39893e-77	2.39187	0.786	0.296	2.3337e-73
Spc25	1.51362e-77	2.8283	0.555	0.115	2.52503e-73
Mcm5	8.6794e-76	2.94651	0.517	0.1	1.4479e-71
Ckap2l	4.82217e-75	4.73104	0.206	0.009	8.04434e-71
Ptma	1.62739e-73	1.38751	1	0.985	2.71481e-69
Cenpk	2.90544e-71	3.53839	0.29	0.027	4.84685e-67
Pmf1	1.7986e-70	2.49316	0.571	0.132	3.00043e-66
Cdkn2c	3.05799e-70	3.08908	0.441	0.077	5.10133e-66
Jpt1	1.0273e-69	2.12411	0.866	0.42	1.71374e-65
Kif18a	3.45792e-69	4.40237	0.202	0.01	5.7685e-65
Tubb5	1.0337e-68	1.60017	1	0.971	1.72442e-64
Gm10282	1.06589e-68	2.46416	0.576	0.142	1.77811e-64
Ncapg	5.50095e-66	3.5883	0.273	0.026	9.17668e-62
Lsm2	1.04456e-65	1.97979	0.836	0.402	1.74254e-61
Dut	6.67878e-65	2.51544	0.626	0.184	1.11415e-60
Prim1	1.16948e-64	2.93059	0.37	0.055	1.95093e-60
Prdx4	2.27519e-64	1.80578	0.882	0.501	3.79547e-60
Mcm7	9.77426e-64	2.77356	0.546	0.139	1.63054e-59
Mns1	1.04169e-62	4.17007	0.202	0.012	1.73775e-58
Syce2	8.35092e-62	3.45978	0.298	0.036	1.3931e-57
Cenpn	1.36627e-61	3.74573	0.244	0.021	2.27921e-57
Kif4	6.56245e-61	4.07533	0.21	0.015	1.09475e-56
Dctpp1	9.55903e-61	2.20255	0.655	0.207	1.59464e-56
Dek	1.00582e-60	2.15886	0.744	0.301	1.67791e-56
Snrpg	6.11716e-60	1.25013	0.987	0.864	1.02046e-55
Aspm	6.17878e-60	4.19592	0.185	0.01	1.03074e-55
Anp32b	1.50387e-59	1.77843	0.899	0.512	2.50876e-55
Gmnn	1.68551e-59	2.64771	0.546	0.15	2.81177e-55
Psat1	3.68476e-59	2.61107	0.445	0.092	6.14691e-55
Hmgb3	3.8027e-59	1.86147	0.811	0.377	6.34366e-55
Uhrf1	7.93978e-59	3.02773	0.357	0.058	1.32451e-54
Hint1	1.16622e-58	1.32205	0.979	0.849	1.94548e-54
Ranbp1	1.22475e-57	1.50631	0.966	0.715	2.04313e-53
Ppia	2.60354e-57	1.08053	0.992	0.974	4.34322e-53
Gapdh	6.17682e-57	1.36289	0.996	0.87	1.03042e-52
Alyref	1.77588e-55	1.99041	0.693	0.267	2.96252e-51
Spdl1	2.74613e-52	4.22289	0.172	0.011	4.58109e-48
Tipin	4.80997e-52	2.19203	0.643	0.233	8.024e-48
Tceal9	6.21647e-52	1.49087	0.937	0.632	1.03703e-47
Exosc8	1.00211e-51	2.00681	0.584	0.18	1.67173e-47
H1f10	1.59846e-51	3.37489	0.239	0.027	2.66655e-47
Rad51	5.48066e-51	3.2905	0.244	0.028	9.14283e-47
Hnrnpa2b1	2.04966e-50	1.18864	0.966	0.857	3.41925e-46
Npm1	2.22503e-50	1.41526	0.983	0.832	3.71179e-46
Prdx1	4.26592e-50	1.03836	0.996	0.972	7.11641e-46
Sox11	4.79002e-50	1.94723	0.723	0.304	7.99071e-46
Ddx39	6.60462e-50	1.73409	0.765	0.353	1.10178e-45
Fam111a	8.42904e-50	2.26339	0.517	0.148	1.40613e-45
Rpsa	1.52351e-49	1.25313	0.983	0.908	2.54152e-45
Nsl1	6.41947e-49	3.37489	0.214	0.022	1.0709e-44
Gm3756	1.01173e-48	2.41039	0.42	0.097	1.68777e-44
Txn1	1.08649e-48	1.1759	0.983	0.821	1.81248e-44
Snrpe	1.68129e-48	1.28655	0.929	0.732	2.80472e-44
Rpa1	2.84378e-48	2.29264	0.496	0.141	4.74399e-44
Dtymk	9.62678e-48	1.99181	0.689	0.288	1.60594e-43
Nasp	2.21923e-47	1.9015	0.706	0.313	3.70212e-43
Cbx5	2.52921e-47	2.06183	0.655	0.26	4.21923e-43
Ckap4	7.54019e-46	1.83884	0.727	0.337	1.25785e-41
Fbln1	2.07876e-45	2.07081	0.492	0.141	3.46778e-41
H4c9	2.08805e-45	2.82646	0.269	0.041	3.48329e-41
Cdk4	2.4048e-45	1.42743	0.895	0.585	4.01169e-41
H2ac8	2.76368e-45	3.95986	0.172	0.014	4.61038e-41
Rplp2	2.78624e-45	1.03601	0.987	0.972	4.648e-41
Ddx39b	6.23613e-45	1.4413	0.861	0.538	1.04031e-40
Hsp90aa1	7.4004e-45	1.48149	0.857	0.539	1.23454e-40
Hells	1.64027e-44	2.61732	0.332	0.065	2.7363e-40
H2az2	1.83753e-44	1.45024	0.882	0.655	3.06537e-40
Hat1	4.02118e-44	2.24012	0.525	0.172	6.70813e-40
Sae1	8.74062e-44	1.62838	0.79	0.432	1.45811e-39
Tfdp1	9.08396e-44	2.00319	0.58	0.205	1.51539e-39
Ncapg2	1.48007e-43	3.35443	0.214	0.026	2.46905e-39
Ilf3	1.52339e-43	1.67739	0.71	0.325	2.54132e-39
Gpsm2	2.03066e-43	3.64283	0.185	0.018	3.38755e-39
Gm3699	2.04019e-43	1.27063	0.954	0.787	3.40345e-39
Rps2	2.37283e-43	1.19318	0.992	0.968	3.95835e-39
Pcna	2.66845e-43	2.27536	0.613	0.248	4.45151e-39
Serbp1	4.42284e-43	1.23311	0.971	0.839	7.37818e-39
Ybx1	8.00347e-43	1.18412	0.992	0.907	1.33514e-38
Rps26	9.60454e-43	1.02952	0.992	0.956	1.60223e-38
Hnrnpdl	9.65218e-43	1.46662	0.824	0.47	1.61018e-38
Tagln2	8.44178e-42	1.1559	0.971	0.831	1.40826e-37
Lmnb2	2.32986e-41	2.49775	0.328	0.068	3.88667e-37
Hnrnpf	3.82871e-41	1.07322	0.979	0.875	6.38705e-37
Nmral1	4.54031e-41	2.74929	0.256	0.041	7.57415e-37
Hnrnpl	7.99502e-41	1.04192	0.958	0.854	1.33373e-36
Hnrnpu	1.30209e-40	1.12106	0.941	0.736	2.17214e-36
Rplp1	1.78269e-40	1.00868	0.996	0.969	2.97388e-36
Slc25a5	3.19734e-40	1.08968	0.979	0.899	5.3338e-36
Nudt21	3.35829e-40	1.49926	0.739	0.354	5.6023e-36
Rps12	3.96393e-40	1.11768	0.975	0.881	6.61262e-36
Srsf1	1.66212e-39	1.55008	0.744	0.365	2.77275e-35
Lsm5	2.03273e-39	1.42672	0.807	0.488	3.391e-35
Eif5a	3.0362e-39	1.15426	0.975	0.874	5.06498e-35
Vrk1	3.27431e-39	2.051	0.45	0.131	5.46221e-35
Calm3	5.21928e-39	1.14685	0.92	0.684	8.7068e-35
Ssrp1	7.07609e-39	1.4763	0.744	0.384	1.18043e-34
Usp1	9.5418e-39	2.1079	0.471	0.149	1.59176e-34
Nde1	1.02546e-38	1.8643	0.605	0.258	1.71067e-34
Pa2g4	1.45233e-38	1.59262	0.752	0.431	2.42278e-34
Bex3	1.75645e-38	1.7027	0.672	0.31	2.93012e-34
Nme1	2.63612e-38	1.37856	0.84	0.556	4.39758e-34
Idh2	5.42926e-38	1.58976	0.639	0.269	9.05709e-34
Siva1	5.45847e-38	1.94064	0.563	0.224	9.10582e-34
Atpif1	8.81181e-38	1.00013	0.958	0.835	1.46999e-33
Rpl12	9.62213e-38	1.1027	0.971	0.832	1.60516e-33
Mrpl51	1.62115e-37	1.46076	0.773	0.441	2.70439e-33
Ptges3	2.39157e-37	1.52638	0.761	0.432	3.98962e-33
Arhgef39	2.45254e-37	4.17136	0.118	0.007	4.09132e-33
Gm21596	4.29857e-37	1.57768	0.647	0.285	7.17088e-33
Mlf1	1.66218e-36	2.82235	0.244	0.042	2.77285e-32
Larp7	1.84507e-36	1.71891	0.567	0.222	3.07794e-32
Smc6	2.20329e-36	1.61361	0.651	0.295	3.67552e-32
Cenps	4.71583e-36	2.91883	0.231	0.038	7.86694e-32
Hpf1	6.02013e-36	1.7664	0.571	0.229	1.00428e-31
Crip1	1.36863e-35	1.51396	0.786	0.475	2.28316e-31
Nsg1	7.31477e-35	2.27437	0.307	0.069	1.22025e-30
Mcm3	7.72378e-35	2.08864	0.521	0.206	1.28848e-30
Oxct1	7.74943e-35	2.18155	0.382	0.107	1.29276e-30
Bub3	9.03118e-35	1.3929	0.803	0.532	1.50658e-30
Rack1	1.32362e-34	1.04384	0.966	0.821	2.20807e-30
G3bp1	4.16797e-34	1.27504	0.857	0.64	6.953e-30
Gm4739	4.76539e-34	3.80231	0.13	0.011	7.94963e-30
Marcks	4.78172e-34	1.24385	0.895	0.682	7.97687e-30
Nudc	5.10282e-34	1.3945	0.794	0.516	8.51252e-30
X2810025M15Rik	7.43245e-34	1.20045	0.828	0.513	1.23988e-29
Snrpd2	9.1735e-34	1.11953	0.899	0.691	1.53032e-29
Lsm6	1.29813e-33	1.31871	0.786	0.47	2.16554e-29
Rbbp7	1.45347e-33	1.28971	0.79	0.49	2.42467e-29
Aprt	1.61605e-33	1.36396	0.794	0.511	2.6959e-29
Hjurp	3.82892e-33	1.96622	0.555	0.244	6.38741e-29
Sfpq	5.84431e-33	1.18387	0.874	0.654	9.74947e-29
Mif	1.2486e-32	1.31021	0.866	0.634	2.08292e-28
Hnrnpa3	2.88991e-32	1.18898	0.84	0.603	4.82095e-28
Rps27l	3.06762e-32	1.02317	0.924	0.778	5.1174e-28
Erh	9.9508e-32	1.07542	0.895	0.691	1.65999e-27
Psip1	5.38872e-31	1.65176	0.584	0.27	8.98946e-27
Tkt	6.25844e-31	1.35465	0.744	0.43	1.04403e-26
Ncl	8.35052e-31	1.21859	0.891	0.731	1.39303e-26
Nop10	8.85466e-31	1.05983	0.903	0.689	1.47714e-26
Lsm8	9.56999e-31	1.42493	0.655	0.335	1.59647e-26
Pdap1	1.16047e-30	1.15957	0.828	0.561	1.93589e-26
Ilf2	2.32956e-30	1.39172	0.714	0.392	3.88617e-26
Cbfb	3.4306e-30	1.61512	0.601	0.278	5.72293e-26
Tubg1	4.9721e-30	1.8098	0.496	0.199	8.29446e-26
Set	7.61482e-30	1.29384	0.836	0.6	1.2703e-25
Pola1	1.09789e-29	2.66707	0.206	0.037	1.83151e-25
Ulbp1	1.74676e-29	2.76296	0.185	0.03	2.91394e-25
Cdc6	2.86219e-29	2.91769	0.176	0.027	4.7747e-25
Hnrnpd	2.88007e-29	1.5764	0.597	0.287	4.80452e-25
Smc1a	3.92458e-29	1.35032	0.664	0.346	6.54698e-25
Snrpa1	4.38095e-29	1.42476	0.651	0.329	7.3083e-25
Anapc5	5.50324e-29	1.15308	0.828	0.57	9.18051e-25
Magoh	6.26282e-29	1.36247	0.706	0.393	1.04476e-24
Rpa3	7.36899e-29	1.61642	0.571	0.269	1.22929e-24
Nxt1	7.40918e-29	1.76296	0.504	0.215	1.236e-24
Tmem37	3.29015e-28	1.39337	0.651	0.341	5.48863e-24
Ywhah	3.31573e-28	1.00654	0.924	0.765	5.53131e-24
Nhp2	8.31355e-28	1.27885	0.727	0.43	1.38687e-23
Arl6ip1	1.63014e-27	1.32544	0.912	0.802	2.7194e-23
C1qbp	1.92037e-27	1.36384	0.655	0.355	3.20357e-23
Nop56	3.34671e-27	1.65465	0.576	0.286	5.58299e-23
Ssna1	1.73779e-26	1.2455	0.739	0.468	2.89897e-22
Bola2	2.84722e-26	1.17805	0.765	0.493	4.74973e-22
Mrpl18	3.00087e-26	1.38464	0.639	0.356	5.00605e-22
Ccne2	4.69231e-26	2.6807	0.21	0.044	7.82771e-22
Gm10275	6.03266e-26	1.18367	0.714	0.43	1.00637e-21
Cbx3	1.31752e-25	1.28771	0.651	0.366	2.19788e-21
Impdh2	1.52839e-25	1.16536	0.782	0.522	2.54965e-21
Naa15	1.55921e-25	1.63084	0.5	0.223	2.60107e-21
Eloc	1.99012e-25	1.01405	0.857	0.606	3.31992e-21
Lsm4	2.32361e-25	1.10872	0.782	0.52	3.87624e-21
Srsf10	2.71381e-25	1.24982	0.735	0.467	4.52718e-21
Trim28	2.76579e-25	1.29365	0.664	0.387	4.61388e-21
Mcm2	3.69979e-25	1.78993	0.387	0.138	6.17199e-21
Sf3b5	3.78526e-25	1.28442	0.723	0.456	6.31457e-21
Dazap1	4.83697e-25	1.11931	0.79	0.562	8.06903e-21
Cct8	5.72595e-25	1.0199	0.828	0.588	9.55203e-21
Ubald2	6.20931e-25	1.10591	0.773	0.533	1.03584e-20
Ndufa5	7.49507e-25	1.03526	0.836	0.638	1.25033e-20
Emg1	9.33831e-25	1.1032	0.718	0.442	1.55782e-20
Acat1	1.9847e-24	1.20731	0.697	0.424	3.31088e-20
Hdac2	2.99186e-24	1.19122	0.718	0.442	4.99103e-20
Fbl	3.98337e-24	1.2551	0.739	0.471	6.64506e-20
Dscc1	4.40476e-24	3.20983	0.118	0.014	7.34803e-20
Ppig	8.07129e-24	1.17642	0.702	0.457	1.34645e-19
E2f1	1.61407e-23	2.50944	0.202	0.045	2.69259e-19
Rfc3	7.04237e-23	1.89274	0.34	0.119	1.17481e-18
Snrpd3	7.74066e-23	1.10307	0.773	0.534	1.2913e-18
Gar1	8.33946e-23	1.16375	0.651	0.371	1.39119e-18
Rps12.ps9	9.56241e-23	1.0239	0.798	0.543	1.5952e-18
Uba2	2.18859e-22	1.20997	0.697	0.432	3.65101e-18
Cct3	6.91331e-22	1.05946	0.765	0.513	1.15328e-17
Fubp1	1.08753e-21	1.05887	0.777	0.537	1.81422e-17
Cbx1	1.09884e-21	1.04905	0.761	0.542	1.83309e-17
Txndc12	1.35591e-21	1.11459	0.693	0.422	2.26194e-17
Stt3b	3.86084e-21	1.03665	0.626	0.323	6.44066e-17
Smarca5	5.03154e-21	1.2496	0.592	0.327	8.39361e-17
Snrnp40	5.21169e-21	1.27671	0.609	0.352	8.69414e-17
Ncaph2	2.45771e-20	1.3708	0.492	0.242	4.09996e-16
Eif4a3	3.33782e-20	1.12353	0.689	0.441	5.56816e-16
Tmed5	1.18757e-19	1.06391	0.702	0.464	1.9811e-15
Nsmce4a	1.6384e-19	1.14805	0.609	0.356	2.73319e-15
Hdgf	2.22912e-19	1.08381	0.676	0.417	3.71861e-15
Macroh2a1	2.86628e-19	1.03436	0.634	0.376	4.78152e-15
Luc7l3	3.51282e-19	1.07743	0.609	0.333	5.86009e-15
Idh3a	5.64315e-19	1.20582	0.529	0.273	9.4139e-15
Trp53	3.38695e-18	1.05895	0.723	0.557	5.65011e-14
Khdrbs1	5.88751e-18	1.04003	0.681	0.449	9.82154e-14
Nsmce1	2.18117e-17	1.05471	0.676	0.46	3.63862e-13
Bcas2	2.27964e-17	1.05113	0.664	0.44	3.8029e-13
Psmd14	3.82534e-17	1.09346	0.571	0.33	6.38143e-13
Fanca	4.14216e-17	3.55547	0.063	0.005	6.90994e-13
Npm3	4.40882e-17	1.50042	0.361	0.153	7.35479e-13
Mrpl14	8.77148e-17	1.18415	0.559	0.337	1.46326e-12
Paics	9.09001e-17	1.1525	0.609	0.385	1.5164e-12
Nudt4	9.5406e-17	1.19703	0.437	0.205	1.59156e-12
Mcm6	1.24321e-16	1.37075	0.513	0.293	2.07393e-12
Mir5136	1.55533e-16	1.87739	0.189	0.052	2.59461e-12
X2700038G22Rik	1.92098e-16	2.27803	0.139	0.03	3.20457e-12
Hnrnpab	2.98015e-16	1.19151	0.471	0.247	4.97149e-12
Acot7	1.85434e-15	1.15048	0.441	0.221	3.09342e-11
Erg28	4.13028e-15	1.12185	0.471	0.25	6.89014e-11
Mybl1	5.08554e-15	3.20497	0.063	0.006	8.48369e-11
Naa20	1.07815e-14	1.02111	0.555	0.332	1.79857e-10
Dcps	2.89982e-14	1.21077	0.458	0.253	4.83748e-10
U2af2	3.18976e-14	1.00674	0.563	0.34	5.32116e-10
Lrwd1	1.07271e-13	1.5409	0.248	0.094	1.78949e-09
Umps	9.74644e-13	1.71593	0.193	0.066	1.6259e-08
Brix1	1.43646e-12	1.11503	0.441	0.244	2.3963e-08
Ppat	1.46667e-12	1.63193	0.231	0.09	2.44671e-08
Wbp11	3.48835e-11	1.01209	0.466	0.284	5.81926e-07
Arxes1	6.9538e-11	1.18437	0.29	0.134	1.16003e-06
Ass1	6.09502e-10	1.36699	0.261	0.121	1.01677e-05
Cntln	7.73481e-10	1.28882	0.223	0.095	1.29032e-05
Raet1e	8.33534e-10	1.84882	0.101	0.026	1.3905e-05
X3110082I17Rik	1.87833e-09	1.52376	0.181	0.071	3.13342e-05
Pan2	5.97559e-09	1.41796	0.185	0.076	9.96848e-05
Plekho1	6.07063e-08	1.28743	0.176	0.075	0.0010127
Mphosph9	1.9576e-07	1.61408	0.126	0.047	0.00326567
Nup153	6.86433e-07	1.40089	0.113	0.041	0.0114511
Nrgn	3.62313e-06	1.8203	0.063	0.017	0.060441
Nol10	5.63836e-06	1.1414	0.147	0.066	0.094059
Ncoa5	1.0638e-05	1.13253	0.155	0.074	0.177462
Cep72	1.24299e-05	2.13785	0.05	0.013	0.207355
Scpep1	2.44706e-05	1.56754	0.092	0.036	0.408219

## Sheet: Pik3caGOF prol lCap LEC
Cell Type:	LEC
Dataset:	ECs from integrated healthy and Pik3ca GOF mutant mice					Petkova et al. 2023
Comaprison:	Proliferating cluster compared to tall other clusters
Up-regulated								Down-regulated
	p_val	avg_log2FC	pct.1	pct.2	p_val_adj				p_val	avg_log2FC	pct.1	pct.2	p_val_adj
Gm14091	1.73441e-178	5.91815	0.804	0.032	4.65255e-174			Fgl2	3.28905e-29	-2.86254	0.991	0.998	8.82287e-25
Gm14024	6.28302e-133	5.54493	0.679	0.036	1.68542e-128			Timp3	1.839e-27	-1.18893	1	1	4.93312e-23
Gm38037	1.18833e-122	6.52324	0.536	0.018	3.1877e-118			Cp	6.1987e-27	-2.27142	0.92	0.976	1.6628e-22
RP23-45G16.9	5.52732e-121	4.59311	0.777	0.065	1.4827e-116			Syn3	6.52586e-25	-1.24024	0.991	0.999	1.75056e-20
Cep55	2.90643e-111	6.9128	0.768	0.081	7.79651e-107			Ctsl	7.58304e-25	-1.69356	0.955	0.983	2.03415e-20
Depdc1a	2.58842e-109	6.32634	0.688	0.058	6.94343e-105			Sepp1	3.3158e-24	-1.65565	1	1	8.89463e-20
Ckap2	5.57183e-107	7.08264	0.929	0.164	1.49464e-102			Gpm6a	2.89367e-23	-2.01098	0.929	0.974	7.76227e-19
Cenpw	8.53671e-107	4.01373	0.884	0.119	2.28997e-102			Palm	5.24897e-23	-1.4569	0.991	0.995	1.40804e-18
Bub1	2.62851e-101	6.53759	0.705	0.072	7.05099e-97			Ltbp4	1.85733e-21	-1.17651	1	1	4.9823e-17
Aspm	3.79879e-101	6.96978	0.75	0.089	1.01903e-96			Mmrn1	3.57456e-19	-1.05894	1	1	9.58874e-15
Pmch	1.64423e-100	6.31065	0.429	0.013	4.41065e-96			Txnip	2.90797e-18	-1.00651	1	1	7.80062e-14
Cdkn3	9.81797e-99	5.33517	0.839	0.129	2.63367e-94			Pard6g	1.79177e-17	-1.14307	1	0.996	4.80641e-13
Knstrn	2.45649e-98	5.77086	0.911	0.174	6.58952e-94			Lbp	2.50055e-17	-1.02555	1	1	6.70773e-13
Ska1	1.18671e-97	6.26715	0.598	0.046	3.18334e-93			Grina	3.50906e-17	-1.51684	0.964	0.982	9.41305e-13
Shcbp1	2.74675e-97	6.54705	0.741	0.092	7.36815e-93			Fmo1	4.62499e-17	-4.02194	0.75	0.856	1.24065e-12
Anln	5.906e-96	5.89009	0.946	0.216	1.58428e-91			Dtx1	4.76268e-17	-2.70993	0.812	0.892	1.27759e-12
Nuf2	2.06304e-95	6.20712	0.866	0.153	5.53411e-91			Prss23	6.62806e-17	-1.20507	0.982	0.997	1.77798e-12
Ect2	6.84083e-95	5.72075	0.768	0.102	1.83505e-90			Slc45a3	1.23004e-16	-1.54893	0.973	0.981	3.29958e-12
Fam64a	3.97689e-94	6.90971	0.875	0.169	1.0668e-89			Hspb1	1.30722e-16	-2.14519	0.571	0.794	3.50662e-12
Kif15	1.18793e-92	5.95247	0.705	0.084	3.18661e-88			Fxyd6	1.77809e-16	-1.05426	1	0.999	4.76973e-12
Parpbp	2.77038e-92	6.36312	0.554	0.04	7.43154e-88			Gja4	3.35928e-16	-2.65351	0.848	0.926	9.01127e-12
Ckap2l	7.81389e-92	5.63151	0.884	0.171	2.09608e-87			Arl4a	3.57179e-16	-1.59681	1	0.962	9.58134e-12
Diap3	1.00851e-91	4.52282	0.75	0.094	2.70533e-87			Prss23os	5.67446e-16	-1.17724	0.946	0.984	1.52217e-11
Cdca3	1.13921e-91	5.86341	0.946	0.239	3.05592e-87			Dock9	6.60457e-16	-1.48235	0.946	0.978	1.77168e-11
Cdc25c	7.64876e-91	6.36537	0.652	0.067	2.05178e-86			Clca3a1	1.96871e-15	-3.70283	0.625	0.781	5.28106e-11
Gen1	1.80831e-88	5.90211	0.446	0.021	4.85079e-84			RP23-317I8.1	2.54693e-15	-2.8217	0.304	0.629	6.83213e-11
Mki67	3.36412e-88	5.87011	1	0.328	9.02425e-84			Tmod2	3.43519e-15	-1.88482	0.884	0.951	9.21489e-11
Birc5	4.05356e-87	5.73234	0.964	0.283	1.08737e-82			Igfbp5	3.8259e-15	-3.10796	0.884	0.926	1.0263e-10
Ccnb1	8.51951e-87	6.09662	0.857	0.171	2.28536e-82			Cracr2b	5.57685e-15	-1.88413	0.848	0.928	1.49599e-10
Cdca8	1.29514e-86	5.95629	0.946	0.254	3.47423e-82			Tm4sf1	1.15272e-14	-1.46971	1	0.999	3.09216e-10
Kif18b	2.35006e-85	7.48505	0.464	0.027	6.30405e-81			Hs3st1	4.41998e-14	-1.92471	0.75	0.87	1.18566e-09
Bub1b	1.04668e-84	5.93439	0.777	0.13	2.80772e-80			Nrep	4.47265e-14	-2.02023	0.741	0.907	1.19979e-09
Spag5	3.95924e-84	7.58743	0.643	0.075	1.06207e-79			Sult1a1	4.56189e-14	-2.03071	0.875	0.92	1.22373e-09
Cks2	2.79011e-83	4.64939	0.955	0.263	7.48447e-79			Lamb1	8.7606e-14	-1.70968	0.893	0.935	2.35003e-09
Tpx2	2.56767e-81	6.33702	0.946	0.294	6.88777e-77			Prelp	9.4527e-14	-1.29529	0.991	0.995	2.53569e-09
Kif23	1.32764e-80	6.36738	0.83	0.171	3.5614e-76			Cd300lg	1.67267e-13	-4.12544	0.812	0.893	4.48693e-09
Cenpa	8.18702e-80	4.93583	0.973	0.319	2.19617e-75			Gucy1a3	2.50375e-13	-4.9341	0.482	0.705	6.71631e-09
Plk1	1.13689e-79	6.79899	0.83	0.173	3.04971e-75			Stmn2	1.25264e-12	-2.27666	0.848	0.905	3.36021e-08
Sgol1	1.90947e-78	6.33714	0.5	0.039	5.12216e-74			Tanc2	1.31048e-12	-2.96193	0.536	0.74	3.51536e-08
Gm23634	3.65297e-78	3.34937	0.946	0.256	9.79908e-74			Tgm2	2.37104e-12	-1.05422	1	1	6.3603e-08
Ccnb2	1.07127e-77	5.04732	0.982	0.376	2.87368e-73			Gm29103	3.52641e-12	-1.61588	0.741	0.835	9.45959e-08
Spc24	1.55753e-77	5.30049	0.839	0.182	4.17806e-73			Gm15851	5.87517e-12	-1.29832	0.83	0.907	1.57602e-07
Cenpe	1.61322e-77	5.84309	0.786	0.156	4.32746e-73			Cd24a	1.02356e-11	-4.08043	0.384	0.661	2.74571e-07
Kif20b	3.30978e-77	4.74768	0.696	0.103	8.87849e-73			Sox4	1.63599e-11	-3.3388	0.33	0.592	4.38854e-07
H1fx	9.69249e-77	4.41579	0.482	0.034	2.60001e-72			Lrg1	2.14992e-11	-1.73568	0.964	0.976	5.76715e-07
Nek2	1.33343e-76	7.04203	0.679	0.102	3.57694e-72			Lcn2	3.26595e-11	-1.53691	0.929	0.945	8.76092e-07
Cenpm	5.59554e-76	5.33446	0.625	0.078	1.501e-71			Pdlim3	3.59652e-11	-3.17502	0.482	0.691	9.64767e-07
Ska3	9.24476e-76	6.19017	0.58	0.065	2.47991e-71			Nrxn2	5.56392e-11	-2.9694	0.188	0.479	1.49252e-06
Arhgap11a	1.80719e-74	4.94469	0.58	0.065	4.84779e-70			Olfm1	6.80479e-11	-1.63045	0.884	0.932	1.82538e-06
Gtse1	1.4629e-73	5.02803	0.652	0.091	3.92423e-69			Flot1	7.33056e-11	-2.12301	0.768	0.85	1.96642e-06
Cenpf	1.20195e-72	5.91945	0.902	0.267	3.22422e-68			Stxbp6	8.62818e-11	-2.2327	0.696	0.8	2.31451e-06
Kif22	1.64368e-71	5.25621	0.848	0.213	4.40918e-67			Reln	1.04787e-10	-1.47726	0.955	0.951	2.81091e-06
Casc5	1.74544e-70	6.96466	0.705	0.126	4.68213e-66			Apoe	1.1913e-10	-3.32378	0.911	0.93	3.19567e-06
Gm26623	2.81969e-70	2.94562	0.777	0.142	7.56382e-66			Map3k1	1.34497e-10	-1.67328	0.795	0.885	3.60789e-06
Ncapd2	3.60969e-70	3.87535	0.902	0.258	9.683e-66			Ecm2	1.75846e-10	-1.98136	0.554	0.744	4.71707e-06
Tacc3	3.95609e-70	4.52821	0.929	0.311	1.06122e-65			Nudt4	2.46354e-10	-2.05289	0.946	0.94	6.60846e-06
Nusap1	5.85412e-70	6.6559	0.696	0.12	1.57037e-65			Serpine2	3.22085e-10	-1.47991	0.946	0.957	8.63993e-06
Kif11	7.27181e-70	6.12351	0.714	0.133	1.95066e-65			Pink1	3.38215e-10	-1.73163	0.875	0.937	9.07261e-06
Cenpp	6.70218e-69	4.49081	0.58	0.07	1.79786e-64			Slco2b1	6.53642e-10	-2.10436	0.812	0.866	1.75339e-05
Sgol2a	9.83746e-69	5.61847	0.616	0.089	2.6389e-64			Serping1	6.67159e-10	-2.02004	0.75	0.839	1.78965e-05
Cdk1	1.02023e-68	5.73757	0.857	0.238	2.73677e-64			Gm14964	6.97527e-10	-3.73701	0.098	0.379	1.87112e-05
Mastl	3.65159e-68	4.41191	0.58	0.074	9.7954e-64			Gm26735	7.27988e-10	-3.35764	0.214	0.476	1.95283e-05
Melk	4.05316e-68	6.47045	0.58	0.078	1.08726e-63			RP24-321M14.5	7.41855e-10	-2.96895	0.134	0.41	1.99003e-05
Pif1	6.23347e-68	8.22603	0.402	0.027	1.67213e-63			H2-T23	8.88941e-10	-1.20299	0.938	0.943	2.38458e-05
Troap	8.23723e-68	7.15718	0.545	0.065	2.20964e-63			Rhoj	9.49192e-10	-1.12998	0.991	0.979	2.54621e-05
1190002F15Rik	2.99958e-67	4.30618	0.857	0.226	8.04638e-63			Bgn	1.03942e-09	-1.73294	0.911	0.955	2.78824e-05
Spdl1	4.39643e-67	5.83393	0.482	0.046	1.17934e-62			Utrn	2.6538e-09	-1.09549	0.991	0.972	7.11883e-05
Hist1h2ab	4.59137e-67	4.97355	0.286	0.008	1.23164e-62			Wipf3	3.25923e-09	-1.80557	0.357	0.572	8.74287e-05
Kif2c	3.92816e-66	6.84392	0.634	0.104	1.05373e-61			Il6st	3.78253e-09	-1.67271	0.982	0.98	0.000101466
Tk1	1.63997e-64	5.05266	0.875	0.254	4.39922e-60			Neat1	6.50762e-09	-1.34819	0.973	0.964	0.000174567
Ttk	2.36784e-64	5.54535	0.455	0.042	6.35173e-60			Sgk1	7.52544e-09	-1.6908	0.902	0.93	0.00020187
Pbk	1.11689e-63	6.26522	0.679	0.131	2.99607e-59			Cd36	9.61627e-09	-2.16014	0.839	0.877	0.000257956
Lmnb1	1.34096e-63	4.16997	0.723	0.144	3.59712e-59			Pim3	1.03428e-08	-2.49113	0.527	0.711	0.000277446
Ndc80	1.56601e-63	5.34921	0.625	0.102	4.20083e-59			Foxp2	1.12888e-08	-3.52107	0.348	0.573	0.000302821
2810417H13Rik	1.69562e-63	4.71181	0.804	0.219	4.54849e-59			Bcr	1.18928e-08	-1.60243	0.83	0.888	0.000319024
Sapcd2	2.12908e-62	7.41177	0.518	0.064	5.71126e-58			Gstm1	1.21825e-08	-2.17345	0.616	0.752	0.000326797
Mir5134	2.1342e-62	4.77856	0.277	0.009	5.725e-58			Il7	1.3905e-08	-1.68818	0.589	0.76	0.000373001
Ube2c	3.56147e-62	6.14481	0.83	0.238	9.55364e-58			Tcn2	1.44766e-08	-1.15765	0.964	0.964	0.000388335
Kif20a	3.97585e-62	4.83011	0.973	0.484	1.06652e-57			Gm27646	2.34077e-08	-1.88736	0.402	0.604	0.000627912
Stmn1	3.12674e-61	3.28456	1	0.602	8.38749e-57			Comp	2.57868e-08	-4.07027	0.366	0.563	0.000691731
Cdc20	3.81168e-61	5.25678	0.911	0.362	1.02248e-56			Tspan7	2.61328e-08	-1.61587	0.839	0.908	0.000701013
Aurka	8.19881e-61	5.75921	0.688	0.143	2.19933e-56			Sesn1	3.71717e-08	-2.44569	0.643	0.769	0.00099713
Lctl	9.50829e-61	3.59607	0.402	0.031	2.5506e-56			Ccdc3	5.79765e-08	-3.10325	0.616	0.721	0.00155522
Dlgap5	3.31539e-60	5.51024	0.768	0.193	8.89353e-56			Mmrn2	8.53255e-08	-2.53524	0.884	0.923	0.00228886
Hmmr	9.82489e-60	6.00434	0.768	0.211	2.63553e-55			Pdcd4	1.03934e-07	-2.18492	0.554	0.692	0.00278803
Racgap1	3.64168e-59	4.19735	0.991	0.892	9.7688e-55			Tcp11l2	1.35607e-07	-2.45355	0.652	0.743	0.00363766
4933413G19Rik	8.70534e-59	4.49678	0.339	0.02	2.33521e-54			Ebf1	1.62516e-07	-2.57673	0.661	0.781	0.00435948
Foxm1	3.10046e-58	4.46049	0.652	0.123	8.31699e-54			Sfxn3	1.67017e-07	-1.3661	0.92	0.914	0.00448022
Ccna2	3.35803e-58	4.90773	0.973	0.512	9.00792e-54			Gm26776	1.86562e-07	-3.06958	0.536	0.662	0.00500453
Iqgap3	2.60589e-57	6.00683	0.741	0.188	6.99031e-53			Gucy1b3	2.30828e-07	-2.36894	0.491	0.644	0.00619196
Ncapg	2.84297e-57	4.93394	0.661	0.136	7.62626e-53			Rasgrf2	3.37991e-07	-4.42961	0.205	0.424	0.0090666
Kifc1	2.86093e-57	5.03919	0.357	0.026	7.67445e-53			Osmr	4.28428e-07	-2.45682	0.616	0.781	0.0114926
Mns1	3.24229e-57	4.18737	0.661	0.128	8.69745e-53			A230059L01Rik	4.39883e-07	-2.19248	0.321	0.516	0.0117999
Cdca2	3.59199e-57	6.28059	0.571	0.094	9.63551e-53			Abca1	4.45819e-07	-1.99348	0.759	0.809	0.0119591
Spc25	1.19753e-56	5.13585	0.688	0.155	3.21236e-52			Epas1	4.52291e-07	-1.40719	0.875	0.922	0.0121327
Zwilch	1.98826e-56	3.84087	0.562	0.085	5.33352e-52			Ogt	4.91975e-07	-1.47575	0.893	0.928	0.0131972
Mad2l1	2.50745e-56	3.43437	0.795	0.206	6.72624e-52			Gm26809	5.48103e-07	-1.30171	0.857	0.868	0.0147029
Depdc1b	1.03315e-55	5.0872	0.268	0.011	2.77143e-51			Anpep	5.63198e-07	-2.08476	0.366	0.552	0.0151078
BC030867	2.80817e-55	6.72441	0.339	0.024	7.53291e-51			Mir7010	6.24004e-07	-5.88107	0.009	0.199	0.0167389
Cks1b	7.4805e-55	2.81106	0.973	0.4	2.00664e-50			Zbtb20	6.41189e-07	-1.04581	0.982	0.982	0.0171999
Mis18bp1	1.59152e-54	6.22715	0.536	0.084	4.26925e-50			Bmx	7.01636e-07	-3.94014	0.304	0.485	0.0188214
Prr11	2.08902e-54	4.79497	0.661	0.138	5.60379e-50			Cpe	8.0609e-07	-2.27963	0.598	0.717	0.0216234
Stil	3.92802e-54	5.0059	0.438	0.049	1.05369e-49			Fabp4	8.15856e-07	-1.21324	0.991	0.984	0.0218853
Phf19	1.69071e-53	5.34019	0.42	0.044	4.53533e-49			Gpihbp1	8.86206e-07	-1.77431	0.875	0.91	0.0237725
Prc1	2.9252e-53	5.96853	0.839	0.297	7.84686e-49			Trim7	1.02034e-06	-1.89358	0.286	0.117	0.0273706
AC122428.1	4.00402e-53	3.34981	0.679	0.143	1.07408e-48			Psen2	1.03092e-06	-1.68188	0.804	0.82	0.0276544
H2afz	8.30175e-53	1.98196	1	0.926	2.22694e-48			Adgrl4	1.13264e-06	-2.18324	0.643	0.754	0.030383
Cdca5	1.66872e-52	6.10028	0.411	0.044	4.47635e-48			Emcn	1.38294e-06	-1.17039	0.982	0.976	0.0370973
Hist1h2ag	6.96444e-52	3.48594	0.375	0.032	1.86821e-47			RP23-148L8.3	1.38584e-06	-2.01336	0.545	0.631	0.0371751
Cenpk	1.05505e-51	4.13279	0.438	0.051	2.83017e-47			Slc10a6	1.43385e-06	-3.01227	0.268	0.455	0.0384631
Tuba1c	1.71636e-51	3.85926	0.893	0.386	4.60413e-47			Tshz2	1.93655e-06	-1.75493	0.661	0.754	0.0519479
AL590388.1	1.87027e-51	5.16241	0.223	0.007	5.01701e-47			Ushbp1	3.22555e-06	-1.68924	0.812	0.884	0.0865254
Bora	2.24327e-51	3.92011	0.58	0.105	6.01758e-47			Gabarapl1	3.73422e-06	-1.57158	0.714	0.784	0.10017
Incenp	2.75969e-51	4.27978	0.75	0.206	7.40286e-47			Tifa	3.93277e-06	-3.84867	0.205	0.396	0.105497
Hist1h4i	3.33277e-51	3.62708	0.464	0.057	8.94015e-47			Mical2	4.93215e-06	-1.1846	0.58	0.684	0.132305
Top2a	5.70424e-51	6.01105	0.83	0.287	1.53016e-46			Gm29325	6.50284e-06	-1.12031	0.259	0.46	0.174439
Hmgn2	8.92818e-51	1.80124	1	0.879	2.39498e-46			Pnrc1	7.02556e-06	-1.68887	0.759	0.786	0.188461
Hist1h3c	9.15208e-51	5.03549	0.232	0.008	2.45505e-46			Sned1	8.6476e-06	-1.04294	0.902	0.92	0.231972
Pmf1	6.33807e-50	2.78106	0.929	0.418	1.70019e-45			Gm10475	8.69054e-06	-1.57736	0.357	0.519	0.233124
Arhgef39	6.3706e-50	7.98557	0.393	0.043	1.70891e-45			Btg1	8.88278e-06	-1.17472	0.946	0.937	0.23828
C330027C09Rik	1.76233e-49	5.07847	0.589	0.121	4.72746e-45			Fmo2	8.91857e-06	-6.20381	0.339	0.491	0.239241
Gng13	2.35666e-49	4.23175	0.277	0.016	6.32175e-45			Tek	9.46804e-06	-1.71057	0.875	0.901	0.25398
2700094K13Rik	3.39842e-48	2.36632	0.982	0.493	9.11627e-44			Lrrc8d	9.47665e-06	-1.45587	0.527	0.652	0.254211
Aurkb	5.76525e-48	6.05425	0.625	0.144	1.54653e-43			Efna1	1.04024e-05	-1.82693	0.902	0.899	0.279043
Trim59	6.31406e-48	3.78546	0.696	0.179	1.69375e-43			Sema6a	1.13164e-05	-1.26176	0.893	0.889	0.303562
Hist1h2ap	1.67829e-47	5.04446	0.536	0.094	4.50201e-43			Gm15635	1.15458e-05	-1.63084	0.339	0.517	0.309715
Hist1h2ae	2.25882e-47	4.76449	0.464	0.066	6.05927e-43			Efnb2	1.29094e-05	-1.69933	0.545	0.665	0.346294
Tubb6	5.91885e-46	2.65268	0.982	0.742	1.58773e-41			Rab3il1	1.46909e-05	-1.3141	0.866	0.865	0.394084
2700099C18Rik	1.84241e-45	3.5732	0.491	0.08	4.94228e-41			Dll4	1.49771e-05	-2.47066	0.491	0.63	0.401761
Hist1h1b	1.10591e-44	5.41821	0.304	0.025	2.9666e-40			G0s2	1.8771e-05	-3.9157	0.214	0.376	0.503533
Rrm2	1.55568e-44	4.42345	0.732	0.23	4.1731e-40			Foxc2	1.87809e-05	-1.90843	0.634	0.699	0.503799
AC034285.2	1.71019e-44	5.16228	0.312	0.027	4.58759e-40			Pgm5	2.31568e-05	-1.55319	0.634	0.704	0.621181
Hist1h2ak	2.48231e-44	5.58281	0.232	0.011	6.6588e-40			Ldb2	2.33703e-05	-1.19978	0.875	0.902	0.626908
Cenpn	2.6643e-44	4.13616	0.491	0.084	7.14698e-40			Gbp9	2.34923e-05	-2.98664	0.321	0.472	0.63018
Tubb4b	3.07587e-44	1.6989	1	0.949	8.25102e-40			Fzd6	2.78054e-05	-1.14943	0.848	0.881	0.745881
Dbf4	3.14515e-44	3.66502	0.643	0.161	8.43688e-40			Sgip1	3.24969e-05	-1.486	0.536	0.648	0.871729
Smc2	3.80398e-44	3.43442	0.83	0.348	1.02042e-39			Cpne2	3.25733e-05	-1.74923	0.732	0.781	0.873778
Tuba1b	3.82639e-44	1.47011	1	0.976	1.02643e-39			Nr3c1	3.29886e-05	-1.15928	0.857	0.872	0.884919
H2afx	4.16471e-44	3.36646	0.902	0.38	1.11718e-39			Sncaip	3.49347e-05	-2.86048	0.393	0.53	0.937123
Dynlt1a	1.87516e-43	3.00667	0.554	0.107	5.03012e-39
Ndc1	1.40996e-42	2.98751	0.741	0.238	3.78223e-38
Gm15599	1.47592e-42	3.08266	0.536	0.101	3.95915e-38
Kif14	2.35335e-42	5.44557	0.375	0.046	6.31285e-38
Gas2l3	3.18634e-42	4.02615	0.607	0.14	8.54736e-38
Hmgb2	6.34792e-42	3.28843	0.893	0.511	1.70283e-37
Fam166a	6.37186e-42	1.59134	1	0.823	1.70925e-37
Lmnb2	6.79436e-41	3.29349	0.705	0.215	1.82259e-36
Trip13	7.48138e-41	3.70852	0.42	0.061	2.00688e-36
Ube2s	8.52119e-41	2.78915	0.812	0.322	2.28581e-36
Asf1b	2.20776e-40	4.18637	0.58	0.139	5.92231e-36
Cdc23	3.83328e-40	2.07835	0.982	0.602	1.02828e-35
Kif4	2.31825e-39	4.6857	0.759	0.276	6.21872e-35
Clspn	2.88807e-39	3.99941	0.384	0.053	7.74726e-35
Ran	3.44533e-39	1.38174	1	0.94	9.24209e-35
Hist1h2af	3.58559e-39	5.39833	0.196	0.009	9.61835e-35
Gm26765	1.04644e-38	2.35717	0.67	0.175	2.80707e-34
Rangap1	1.4943e-38	2.53104	0.911	0.505	4.00845e-34
Ncaph	6.49697e-38	4.08003	0.598	0.163	1.74281e-33
Psat1	1.0752e-37	2.26508	0.911	0.459	2.88421e-33
Cdk5rap2	1.60128e-37	2.65782	0.634	0.171	4.29544e-33
Fbxo5	2.17415e-37	3.28372	0.482	0.094	5.83217e-33
RP23-114E15.17	3.96514e-37	3.88446	0.304	0.032	1.06365e-32
Plk4	4.86938e-37	3.81908	0.616	0.174	1.30621e-32
Ccnf	5.27547e-37	4.65153	0.473	0.094	1.41515e-32
Ppp1r18os	7.0148e-37	2.13451	0.741	0.232	1.88172e-32
Fam83d	8.94684e-37	4.47192	0.589	0.161	2.39999e-32
Anp32e	1.20158e-36	2.12508	0.929	0.538	3.22323e-32
Rrm1	2.47069e-36	2.6076	0.911	0.552	6.62761e-32
Kntc1	3.55757e-36	3.72876	0.295	0.031	9.54318e-32
Hist1h3g	1.00662e-35	5.85604	0.143	0.003	2.70025e-31
AL590614.2	1.5556e-35	3.17568	0.277	0.026	4.1729e-31
Kif18a	2.661e-35	4.64409	0.464	0.094	7.13814e-31
Gsg2	3.23736e-35	4.42344	0.312	0.038	8.68421e-31
Arhgap19	6.87878e-35	4.6531	0.402	0.069	1.84523e-30
Mxd3	1.18007e-34	2.15329	0.991	0.878	3.16553e-30
Gm37676	1.46111e-34	1.59884	0.482	0.091	3.91943e-30
Ckap5	2.6849e-34	2.10475	0.875	0.396	7.20225e-30
AC034285.3	3.07059e-34	5.13704	0.179	0.009	8.23686e-30
Ulbp1	5.73913e-34	2.73361	0.589	0.157	1.53952e-29
Nrm	2.36055e-33	2.44987	0.83	0.394	6.33218e-29
Poln	5.06464e-33	2.40013	0.411	0.07	1.35859e-28
Eldr	1.34793e-32	3.58226	0.214	0.016	3.61583e-28
Spata24	2.05382e-32	2.36765	0.589	0.157	5.50938e-28
Gm27038	2.735e-32	7.17159	0.125	0.003	7.33664e-28
Chtf18	3.83115e-32	3.88896	0.321	0.045	1.02771e-27
Tmpo	1.32105e-31	2.3116	0.902	0.559	3.54372e-27
1500009L16Rik	1.4491e-31	1.84089	0.875	0.386	3.8872e-27
Anapc15	1.87466e-31	1.89833	0.723	0.256	5.02878e-27
Hn1	2.2024e-31	2.13299	0.955	0.651	5.90795e-27
Rnf26	2.51141e-31	2.1194	0.714	0.252	6.73685e-27
Ube2t	2.68284e-31	3.91735	0.402	0.077	7.19671e-27
Hist1h2an	2.93838e-31	5.48983	0.134	0.004	7.88221e-27
Tyms	3.48793e-31	1.91664	0.938	0.585	9.35636e-27
Tomt	4.46991e-31	1.86136	0.679	0.223	1.19905e-26
Oip5	4.77122e-31	4.05298	0.357	0.059	1.27988e-26
Chek2	5.80956e-31	3.53307	0.598	0.194	1.55841e-26
Poc1a	6.29877e-31	3.3106	0.536	0.142	1.68965e-26
Ahcy	6.92451e-31	2.25649	0.554	0.141	1.8575e-26
Hist1h4b	8.15623e-31	3.05684	0.25	0.025	2.18791e-26
Lgals1	8.21899e-31	1.50375	1	0.866	2.20474e-26
Exosc9	1.39154e-30	1.63212	0.964	0.574	3.73281e-26
Mtfr2	1.77502e-30	6.10758	0.152	0.007	4.76149e-26
Nucks1	2.05904e-30	1.75548	0.964	0.607	5.52337e-26
4930558J22Rik	3.32304e-30	3.428	0.241	0.024	8.91407e-26
Gm5620	5.2156e-30	2.23796	0.679	0.229	1.39908e-25
Hist1h3f	2.61321e-29	4.65238	0.143	0.006	7.00994e-25
Gmnn	5.34287e-29	2.39875	0.554	0.152	1.43323e-24
Efcab11	6.5065e-29	6.81863	0.214	0.02	1.74537e-24
Rad51	7.91242e-29	2.59992	0.741	0.3	2.12251e-24
Uhrf1	1.01829e-28	2.65566	0.491	0.126	2.73156e-24
Lrr1	1.05034e-28	4.62021	0.232	0.024	2.81754e-24
Ncapg2	2.31899e-28	2.58516	0.589	0.193	6.22068e-24
Cep89	2.35476e-28	2.85842	0.705	0.296	6.31665e-24
Neil3	3.43383e-28	5.51909	0.598	0.215	9.21124e-24
Tubb3	4.08967e-28	4.05765	0.286	0.039	1.09705e-23
Hist1h3i	4.66262e-28	4.38115	0.152	0.008	1.25075e-23
Gm17383	5.69783e-28	2.38625	0.509	0.128	1.52844e-23
Gpsm2	6.70526e-28	1.84593	0.955	0.665	1.79868e-23
Gm11491	6.94375e-28	2.16113	0.482	0.117	1.86266e-23
Haus3	8.381e-28	2.73422	0.589	0.188	2.2482e-23
Rad51ap1	9.46916e-28	3.83353	0.482	0.129	2.5401e-23
Reep4	1.56005e-27	2.66408	0.759	0.36	4.18484e-23
Psrc1	3.08152e-27	3.71861	0.42	0.098	8.26617e-23
Kifc5b	4.33949e-27	4.41405	0.152	0.009	1.16407e-22
RP23-110C17.2	5.12449e-27	1.53783	0.991	0.756	1.37465e-22
Gm7856	5.8359e-27	4.70936	0.125	0.005	1.56548e-22
Hist2h2bb.1	7.1727e-27	5.4162	0.17	0.012	1.92408e-22
Tubb4b-ps2	1.05395e-26	2.59446	0.321	0.053	2.82721e-22
AL589651.4	1.08929e-26	5.8511	0.107	0.003	2.92203e-22
Gm16212	1.08929e-26	4.7974	0.107	0.003	2.92203e-22
Hirip3	1.09336e-26	2.57516	0.438	0.103	2.93294e-22
Cmc2	1.20312e-26	1.98119	0.696	0.275	3.22737e-22
4930579G24Rik	1.22312e-26	3.22062	0.438	0.107	3.28103e-22
Cenpq	1.24048e-26	2.73255	0.705	0.325	3.32759e-22
Rad21	1.41076e-26	1.71229	0.946	0.611	3.78437e-22
Slc7a5	1.9056e-26	3.04453	0.384	0.08	5.11178e-22
Gm14150	3.6791e-26	1.8234	0.679	0.249	9.8692e-22
E2f8	6.04173e-26	2.34246	0.616	0.214	1.62069e-21
Ccdc184	9.55785e-26	2.04831	0.75	0.341	2.56389e-21
Gm26737	1.67978e-25	2.17987	0.58	0.192	4.50602e-21
Fam73a	2.42291e-25	1.27434	0.938	0.586	6.49946e-21
Traip	3.3578e-25	3.34977	0.304	0.052	9.00729e-21
Ddias	3.9005e-25	3.07239	0.286	0.045	1.04631e-20
Hist2h2bb	4.21719e-25	5.16041	0.152	0.01	1.13126e-20
Ccdc18	4.41631e-25	3.56051	0.321	0.059	1.18467e-20
Miip	4.97435e-25	2.20919	0.795	0.391	1.33437e-20
Cep85	5.80723e-25	1.48968	0.812	0.395	1.55779e-20
Tubb2a	7.94537e-25	1.39522	0.991	0.789	2.13135e-20
Nsl1	9.55845e-25	4.23854	0.357	0.077	2.56405e-20
Mybl1	1.12586e-24	3.32713	0.241	0.031	3.02011e-20
Tubb4b-ps1	1.43854e-24	2.62477	0.304	0.051	3.85889e-20
Gm2788	1.47662e-24	1.96778	0.339	0.064	3.96104e-20
Dynlt1f	1.60632e-24	1.41739	0.795	0.325	4.30894e-20
Hist1h2ai	2.05822e-24	4.27065	0.134	0.007	5.52118e-20
9630013D21Rik	2.16375e-24	3.04521	0.304	0.053	5.80425e-20
RP24-230J14.4	2.19009e-24	1.3884	0.714	0.265	5.87491e-20
Sae1	2.71592e-24	1.38702	0.991	0.771	7.28545e-20
Prdx4	3.22225e-24	1.38896	0.982	0.762	8.64368e-20
Hist1h3a	3.52473e-24	4.47872	0.152	0.011	9.45508e-20
WI1-49P9.2	4.8316e-24	2.59137	0.696	0.298	1.29608e-19
Mcm5	7.63953e-24	2.60197	0.723	0.341	2.0493e-19
RP24-378G4.3	8.39795e-24	1.31341	0.991	0.833	2.25275e-19
Cenpl	9.72514e-24	3.40102	0.491	0.155	2.60877e-19
Tpi1	1.21356e-23	1.04394	1	0.943	3.25538e-19
Hist1h2bb	1.29939e-23	3.43015	0.143	0.009	3.48561e-19
Cdkn2d	1.37743e-23	2.55705	0.705	0.318	3.69495e-19
Hsp90aa1	1.70621e-23	1.08581	1	0.891	4.5769e-19
Hspb6	2.31814e-23	2.75079	0.527	0.175	6.2184e-19
Esco2	3.66278e-23	6.04125	0.339	0.076	9.8254e-19
Gm10182	4.10612e-23	2.93432	0.241	0.034	1.10147e-18
Hist2h2ac	5.53513e-23	3.58347	0.223	0.03	1.4848e-18
Kpna2	7.0014e-23	2.68207	0.812	0.479	1.87812e-18
Hist1h3e	1.43029e-22	2.17664	0.17	0.016	3.83675e-18
Aipl1	1.5639e-22	4.3714	0.232	0.033	4.19517e-18
Gm13007	1.61561e-22	2.79193	0.143	0.01	4.33387e-18
Cotl1	1.81905e-22	1.21191	0.982	0.748	4.87959e-18
Gm12811	1.90988e-22	2.92636	0.223	0.03	5.12325e-18
Kctd18	2.59095e-22	1.56081	0.696	0.314	6.95021e-18
Ska2	2.80791e-22	2.21325	0.598	0.23	7.53221e-18
Adam12	3.0743e-22	1.28465	0.866	0.499	8.2468e-18
2810408I11Rik	3.12542e-22	3.81556	0.268	0.046	8.38395e-18
Tubg1	3.27944e-22	1.7572	0.812	0.444	8.79709e-18
Hist1h2bm	3.55222e-22	5.29445	0.125	0.007	9.52882e-18
Ttf2	3.91372e-22	1.75358	0.554	0.192	1.04985e-17
Gm10184	5.42973e-22	3.39991	0.179	0.018	1.45653e-17
Calm3	5.77833e-22	1.21559	0.973	0.712	1.55004e-17
Ercc6l	5.80398e-22	2.76051	0.304	0.061	1.55692e-17
Gm22551	6.86357e-22	4.42021	0.116	0.006	1.84115e-17
Nup37	7.20461e-22	2.53792	0.518	0.171	1.93264e-17
Ptpn7	7.72084e-22	1.75947	0.804	0.433	2.07112e-17
Wdr62	7.8511e-22	2.28924	0.562	0.2	2.10606e-17
Lsm5	1.08388e-21	1.07012	0.938	0.515	2.90751e-17
Cdc45	1.13441e-21	2.79375	0.438	0.125	3.04306e-17
Gm16897	1.1782e-21	1.49182	0.857	0.494	3.16052e-17
Dnah11	1.24505e-21	2.93738	0.241	0.036	3.33986e-17
Gm11788	1.27463e-21	1.72775	0.482	0.136	3.41919e-17
Ccdc34	1.67715e-21	1.44356	0.768	0.387	4.49897e-17
Hist1h2aa	2.07087e-21	4.01362	0.134	0.009	5.5551e-17
AL606464.1	2.07087e-21	4.01362	0.134	0.009	5.5551e-17
Cd34	2.28041e-21	1.52105	1	0.967	6.11721e-17
Lbr	2.341e-21	1.36544	0.955	0.756	6.27974e-17
Fignl1	2.5047e-21	3.21021	0.357	0.085	6.71886e-17
Vars	3.06811e-21	1.53625	0.929	0.676	8.23021e-17
Fam111a	3.39102e-21	1.87503	0.634	0.257	9.0964e-17
Sparc	3.72334e-21	1.08125	1	1	9.98787e-17
Fkbp2	3.75925e-21	1.0695	0.946	0.587	1.00842e-16
Gm23865	4.09693e-21	1.56928	0.5	0.149	1.099e-16
Gm30414	4.42541e-21	2.3292	0.42	0.112	1.18712e-16
Ddx39	5.12016e-21	1.21122	0.982	0.821	1.37348e-16
Lmf2	5.46424e-21	1.10469	0.991	0.873	1.46578e-16
Apitd1	5.65027e-21	2.87625	0.268	0.047	1.51569e-16
Ankle1	5.8588e-21	5.63296	0.295	0.061	1.57162e-16
Brip1os	7.07041e-21	1.61707	0.866	0.544	1.89664e-16
3300005D01Rik	7.46116e-21	1.34355	0.92	0.606	2.00146e-16
Tmem194	7.73921e-21	2.44927	0.446	0.136	2.07604e-16
Odf2	7.77433e-21	1.60803	0.812	0.468	2.08546e-16
Hist1h4k	9.08545e-21	3.44459	0.098	0.004	2.43717e-16
Hist1h2bj	9.47699e-21	3.10047	0.188	0.022	2.5422e-16
G2e3	1.78303e-20	2.48322	0.518	0.181	4.78299e-16
Ncaph2	1.89944e-20	1.22475	0.982	0.86	5.09525e-16
H2afv	1.94965e-20	1.17887	0.982	0.868	5.22993e-16
Myh10	2.15663e-20	1.35005	0.679	0.298	5.78516e-16
Nts	2.61725e-20	1.23905	0.964	0.711	7.02078e-16
Cenpu	2.99792e-20	3.57845	0.312	0.07	8.04193e-16
Neurl1b	2.99826e-20	3.89715	0.438	0.135	8.04283e-16
Mlf1	3.82276e-20	2.28782	0.429	0.126	1.02545e-15
Fen1	5.15027e-20	2.25288	0.652	0.305	1.38156e-15
Rbp7	5.98658e-20	1.66954	0.821	0.499	1.6059e-15
Xkr5	7.08875e-20	3.97761	0.161	0.017	1.90156e-15
Cntrob	8.36352e-20	2.35043	0.277	0.054	2.24351e-15
Hist1h2bf	8.37726e-20	4.58122	0.116	0.007	2.2472e-15
Hist1h2bp	9.40272e-20	7.0681	0.089	0.003	2.52228e-15
Dnah14.2	9.61648e-20	1.17017	0.857	0.509	2.57962e-15
RP24-148O24.2	1.05514e-19	2.22292	0.286	0.055	2.83043e-15
Aunip	1.27416e-19	4.85689	0.17	0.02	3.41792e-15
Npnt	1.30326e-19	1.18578	0.946	0.68	3.49601e-15
RP23-158A20.2	1.55331e-19	4.23782	0.071	0.001	4.16675e-15
Uevld	1.70723e-19	1.49226	0.652	0.286	4.57965e-15
Tube1	1.9842e-19	2.97327	0.223	0.036	5.3226e-15
Ncapd3	2.04754e-19	1.92137	0.562	0.219	5.49252e-15
Gm28535	2.11953e-19	3.7402	0.125	0.009	5.68565e-15
Gm16436	2.22775e-19	3.56187	0.17	0.02	5.97593e-15
Rbl1	2.57381e-19	2.55236	0.42	0.126	6.90423e-15
RP24-230J14.5	3.34381e-19	1.17257	0.973	0.825	8.96978e-15
Gm37416	3.61987e-19	1.83609	0.438	0.124	9.71031e-15
RP23-472G22.2	4.61023e-19	2.60182	0.241	0.04	1.23669e-14
Nup205	5.44297e-19	1.74599	0.616	0.274	1.46008e-14
Mad1l1	6.00029e-19	1.12566	0.884	0.542	1.60958e-14
Acat3	6.19458e-19	1.07039	0.964	0.679	1.6617e-14
Plau	6.49696e-19	1.69978	0.911	0.7	1.74281e-14
Crmp1	6.67957e-19	2.44221	0.562	0.217	1.7918e-14
Alg8	7.40459e-19	2.18701	0.518	0.205	1.98628e-14
Gm10143	7.98523e-19	2.2265	0.679	0.343	2.14204e-14
Pbdc1	8.01186e-19	1.23147	0.866	0.484	2.14918e-14
Cdca4	8.14689e-19	1.61733	0.804	0.497	2.1854e-14
AC125099.2	9.21418e-19	3.31575	0.188	0.026	2.4717e-14
Nde1	1.08675e-18	1.54639	0.902	0.642	2.91522e-14
Uchl5	1.23159e-18	1.43167	0.821	0.511	3.30373e-14
Fanca	1.23321e-18	3.25059	0.482	0.169	3.30809e-14
Ass1	1.75183e-18	1.75981	0.688	0.341	4.69927e-14
Lig1	1.81005e-18	2.32353	0.643	0.294	4.85545e-14
Thap8	1.89474e-18	1.21677	0.259	0.048	5.08264e-14
Nup35	2.05116e-18	1.19886	0.625	0.257	5.50223e-14
Espl1	2.28655e-18	1.67844	0.545	0.209	6.13368e-14
Gm28592	2.4226e-18	2.08418	0.402	0.114	6.49863e-14
Hist1h3d	2.46929e-18	3.48645	0.134	0.012	6.62386e-14
Hist1h3h	2.76215e-18	3.27527	0.089	0.004	7.40947e-14
4930427A07Rik	3.83464e-18	3.59027	0.857	0.584	1.02864e-13
1700066M21Rik	4.02302e-18	1.78918	0.375	0.103	1.07918e-13
Setd8	4.33746e-18	1.07663	0.562	0.218	1.16352e-13
Hdgf	4.58546e-18	1.04368	0.955	0.744	1.23005e-13
Nap1l1	4.64773e-18	1.01264	0.964	0.733	1.24675e-13
Dnajc9	4.86753e-18	1.60746	0.732	0.389	1.30571e-13
Snrnp25	5.18328e-18	1.44607	0.661	0.304	1.39042e-13
Eme1	6.06763e-18	1.85461	0.884	0.593	1.62764e-13
Cd40	6.61424e-18	1.09973	0.875	0.547	1.77427e-13
Fancd2	7.90729e-18	3.74648	0.295	0.069	2.12113e-13
Gm11953	7.96385e-18	2.01276	0.277	0.056	2.1363e-13
Tmem97	9.29793e-18	1.82605	0.571	0.231	2.49417e-13
Aaas	9.70485e-18	1.5531	0.75	0.401	2.60333e-13
Lsm3	1.15686e-17	1.26016	0.839	0.469	3.10328e-13
Pgk1	1.29068e-17	1.02465	0.973	0.744	3.46226e-13
Pcdh12	1.34389e-17	1.3455	0.83	0.531	3.60498e-13
Bard1	1.54285e-17	4.17907	0.223	0.04	4.13869e-13
Cenph	1.63839e-17	3.14004	0.402	0.128	4.39498e-13
Gm11832	1.70755e-17	3.51793	0.107	0.007	4.5805e-13
Gm13199	1.84254e-17	1.14913	0.545	0.188	4.9426e-13
Ak6	2.22814e-17	1.05678	0.973	0.741	5.97698e-13
Phlda1	2.55054e-17	2.19493	0.438	0.145	6.84182e-13
Fam167a	2.83796e-17	1.87981	0.527	0.206	7.61283e-13
Cdca7l	3.39086e-17	2.67694	0.312	0.078	9.09598e-13
Hist1h1d	3.55891e-17	3.23556	0.196	0.031	9.54677e-13
Hist1h4d	3.8385e-17	2.30088	0.58	0.248	1.02968e-12
Brca1	3.84285e-17	3.48221	0.205	0.034	1.03084e-12
Ticrr	4.17659e-17	4.5403	0.152	0.018	1.12037e-12
Hist1h2bg	4.46737e-17	1.74874	0.25	0.049	1.19837e-12
Hist1h3b	4.63614e-17	2.49355	0.08	0.003	1.24364e-12
E2f7	4.76428e-17	2.38141	0.482	0.182	1.27802e-12
Smc4	5.23184e-17	1.25583	0.946	0.805	1.40344e-12
Mybl2	5.36185e-17	3.69286	0.241	0.049	1.43832e-12
Slc24a5	5.43051e-17	1.0334	0.768	0.404	1.45673e-12
E2f2	6.49094e-17	1.48995	0.562	0.222	1.7412e-12
Pdzd11	6.6179e-17	1.02626	0.821	0.472	1.77525e-12
Cenpi	7.57037e-17	4.45977	0.384	0.129	2.03075e-12
Taf9	7.9212e-17	1.08308	0.929	0.682	2.12486e-12
Hp1bp3	8.00278e-17	1.0165	1	0.881	2.14675e-12
Rcc1	8.10614e-17	2.37409	0.741	0.464	2.17447e-12
Acot7	8.33525e-17	1.10064	0.964	0.794	2.23593e-12
Mest	1.02294e-16	1.26729	0.955	0.754	2.74404e-12
Ssna1	1.52384e-16	1.07342	0.973	0.783	4.0877e-12
Anp32b	1.55918e-16	1.1454	0.955	0.821	4.18251e-12
Lsm2	1.96449e-16	1.08071	0.911	0.698	5.26974e-12
Polh	2.10727e-16	1.4444	0.366	0.105	5.65274e-12
9430069I07Rik	2.14066e-16	1.86057	0.339	0.091	5.74232e-12
Dsn1	2.14191e-16	2.41202	0.42	0.14	5.74569e-12
Cse1l	2.18855e-16	1.13684	0.866	0.59	5.87079e-12
Cep70	2.19408e-16	1.49008	0.518	0.204	5.88563e-12
Fam72a	2.49476e-16	3.0038	0.241	0.049	6.69219e-12
Hist1h2bh	2.54105e-16	4.90285	0.098	0.007	6.81637e-12
1700097N02Rik	2.84739e-16	4.89086	0.143	0.017	7.63814e-12
Fam129b	2.87975e-16	1.6354	0.848	0.566	7.72492e-12
Adam15	3.12301e-16	1.12458	0.973	0.903	8.37747e-12
Gm12387	3.20361e-16	7.28506	0.054	0.001	8.59368e-12
Timm50	3.31086e-16	1.01802	0.902	0.621	8.88139e-12
Got1	3.3413e-16	1.38539	0.759	0.421	8.96305e-12
Hist1h2ac	3.43792e-16	1.36625	0.116	0.01	9.22221e-12
Gm12856	3.51352e-16	4.79439	0.054	0.001	9.42502e-12
Rad51b	4.0297e-16	6.45793	0.089	0.005	1.08097e-11
Ppih	4.1024e-16	1.1336	0.554	0.227	1.10047e-11
Xpo1	4.19676e-16	1.14375	0.804	0.491	1.12578e-11
Sec14l2	4.51556e-16	1.59569	0.473	0.169	1.2113e-11
Haus4	4.8159e-16	1.92772	0.688	0.365	1.29186e-11
Ubald2	5.21506e-16	1.10929	0.938	0.687	1.39894e-11
Fam216a	5.58837e-16	1.35494	0.732	0.401	1.49908e-11
RP24-322E13.1	5.93947e-16	2.04798	0.259	0.056	1.59326e-11
Arl6ip1	5.99261e-16	1.51409	0.991	0.867	1.60752e-11
Lin9	6.11338e-16	1.81626	0.384	0.121	1.63991e-11
Gm10282	6.30122e-16	2.66014	0.143	0.017	1.6903e-11
Gm26625	6.64511e-16	2.51268	0.214	0.04	1.78255e-11
AA467197	7.18195e-16	1.52479	0.661	0.31	1.92656e-11
Galm	7.36285e-16	2.271	0.402	0.131	1.97508e-11
Srrt	8.39984e-16	1.11812	0.857	0.591	2.25326e-11
Nup85	8.76057e-16	1.29608	0.821	0.512	2.35002e-11
Tubd1	8.98925e-16	2.4322	0.375	0.119	2.41137e-11
Ruvbl2	9.67178e-16	1.32003	0.866	0.547	2.59445e-11
Rad18	1.09892e-15	1.54502	0.598	0.279	2.94785e-11
Gadd45a	1.17904e-15	1.25602	0.741	0.388	3.16278e-11
Pcbd2	1.21733e-15	1.1907	0.696	0.34	3.26549e-11
Hist1h1e	1.3085e-15	2.24986	0.455	0.176	3.51006e-11
Psip1	1.34874e-15	1.54333	0.741	0.407	3.618e-11
E230016M11Rik	1.39539e-15	1.28281	0.661	0.304	3.74314e-11
Syngr4	1.48124e-15	5.33882	0.098	0.007	3.97343e-11
Ipo9	1.51448e-15	1.12584	0.848	0.537	4.06259e-11
Cdc27	1.57369e-15	1.53581	0.768	0.46	4.22143e-11
Ckap4	1.69669e-15	1.41406	0.83	0.482	4.55136e-11
Gm16121	2.07023e-15	1.20167	0.562	0.22	5.55338e-11
Gap43	2.07392e-15	1.00077	0.938	0.717	5.56329e-11
Gm11149	2.11691e-15	1.65445	0.268	0.061	5.67862e-11
Hist1h4c	2.24984e-15	1.76631	0.214	0.04	6.03519e-11
Mrpl51	2.29928e-15	1.01098	0.964	0.69	6.16781e-11
Cyp39a1	2.55578e-15	1.45788	0.518	0.219	6.85587e-11
Ezh2	2.67677e-15	2.35457	0.429	0.16	7.18043e-11
Exosc8	3.63697e-15	1.26044	0.83	0.573	9.75617e-11
Stom	3.82173e-15	1.37764	0.875	0.61	1.02518e-10
Haus1	3.87214e-15	1.58677	0.5	0.2	1.0387e-10
Cenpt	4.34166e-15	1.38372	0.723	0.404	1.16465e-10
Hist1h2bn	5.04787e-15	4.58618	0.089	0.006	1.35409e-10
Gm10657	5.22092e-15	1.37094	0.446	0.153	1.40051e-10
Wee1	5.32935e-15	1.11547	0.42	0.143	1.4296e-10
Hist1h4n	5.82911e-15	3.36951	0.089	0.006	1.56366e-10
Lrrc40	6.06976e-15	1.37863	0.554	0.248	1.62821e-10
Polq	6.39511e-15	5.07811	0.152	0.022	1.71549e-10
4731419I09Rik	6.83823e-15	1.11235	0.911	0.655	1.83435e-10
Copg2	7.11808e-15	1.01878	0.884	0.609	1.90942e-10
Rps6ka3	7.46181e-15	1.10599	0.768	0.445	2.00163e-10
Nudcd2	7.46276e-15	1.06605	0.839	0.524	2.00189e-10
Syce2	7.78177e-15	1.47106	0.411	0.136	2.08746e-10
Mir147	8.3969e-15	1.51643	0.554	0.231	2.25247e-10
Cdkn2c	8.72889e-15	2.24279	0.634	0.343	2.34152e-10
AL589651.3	9.11642e-15	4.79576	0.08	0.005	2.44548e-10
Pnkp	9.47235e-15	1.0424	0.857	0.564	2.54096e-10
Cdc25b	9.93522e-15	2.02017	0.67	0.382	2.66512e-10
Setx	1.11145e-14	1.14253	0.839	0.547	2.98147e-10
Gm17228	1.41635e-14	1.11152	0.705	0.354	3.79936e-10
Rad54b	1.45681e-14	4.17334	0.214	0.045	3.9079e-10
Oscp1	1.46432e-14	2.1182	0.509	0.225	3.92805e-10
Fancb	1.55144e-14	1.67131	0.259	0.061	4.16173e-10
Gm12919	1.63838e-14	3.31156	0.098	0.008	4.39496e-10
Gm22801	1.65167e-14	1.97259	0.42	0.144	4.43061e-10
Pcbp3	1.89207e-14	1.52791	0.679	0.357	5.07547e-10
Pask	1.92463e-14	3.58124	0.259	0.064	5.16281e-10
Ppp2r5d	1.96643e-14	1.00508	0.973	0.818	5.27494e-10
Hist1h4j	1.97955e-14	2.63305	0.107	0.01	5.31014e-10
Gm22240	2.19509e-14	1.19521	0.446	0.153	5.88833e-10
Tbl2	2.30062e-14	1.29044	0.634	0.323	6.17141e-10
Cd276	2.94814e-14	1.38339	0.777	0.468	7.90839e-10
Serinc2	3.43801e-14	1.13354	0.92	0.773	9.22247e-10
Pvrl1	3.73169e-14	1.36137	0.438	0.153	1.00103e-09
Scml2	4.53048e-14	3.38928	0.196	0.038	1.2153e-09
Gm23451	4.7793e-14	6.97455	0.054	0.001	1.28205e-09
Hist1h2bl	4.7793e-14	5.2493	0.054	0.001	1.28205e-09
Tcf19	4.86414e-14	2.86933	0.482	0.198	1.3048e-09
BC037032	4.90787e-14	1.27633	0.366	0.115	1.31654e-09
mmu-mir-9769	6.72937e-14	3.16758	0.107	0.011	1.80515e-09
Fzr1	7.02136e-14	1.37937	0.866	0.61	1.88348e-09
Spef1	7.37617e-14	1.38873	0.5	0.206	1.97866e-09
Gm16470	8.12806e-14	1.44434	0.429	0.144	2.18035e-09
Sap30	8.90043e-14	2.41543	0.312	0.096	2.38754e-09
Ddx11	8.97091e-14	2.94306	0.312	0.095	2.40645e-09
Chek1	1.02657e-13	2.0937	0.223	0.05	2.75377e-09
Atad2	1.07067e-13	2.17018	0.446	0.182	2.87206e-09
Tmem237	1.10639e-13	1.49046	0.679	0.387	2.9679e-09
Actg-ps1	1.41034e-13	1.54743	0.509	0.213	3.78324e-09
Tmem138	1.61434e-13	1.22351	0.67	0.367	4.33046e-09
Dctpp1	1.67657e-13	1.1207	0.643	0.316	4.4974e-09
Smc1b	1.78019e-13	5.48336	0.089	0.007	4.77535e-09
Ncam1	1.97821e-13	1.46029	0.536	0.244	5.30655e-09
Zbed3	2.276e-13	1.47562	0.732	0.451	6.10537e-09
Hist1h2ad	2.43444e-13	6.32614	0.045	0.001	6.53038e-09
Klk8	2.71676e-13	1.63331	0.732	0.451	7.2877e-09
Mtl5	2.72815e-13	3.55867	0.134	0.019	7.31827e-09
Pradc1	2.81931e-13	1.55689	0.58	0.277	7.5628e-09
Hn1l	3.10391e-13	1.1748	0.866	0.663	8.32623e-09
Hist1h2aj	3.3178e-13	7.96664	0.036	0	8.89999e-09
AC034285.4	3.3178e-13	6.87489	0.036	0	8.89999e-09
Prim1	3.52488e-13	1.69253	0.491	0.22	9.45549e-09
Atl2	3.63321e-13	1.39055	0.527	0.235	9.74608e-09
Rfc5	3.65166e-13	1.19813	0.804	0.567	9.79557e-09
Slc25a10	3.70116e-13	1.67099	0.625	0.367	9.92836e-09
Gins2	3.75387e-13	1.85859	0.482	0.217	1.00698e-08
Rtkn2	4.00796e-13	3.77658	0.241	0.061	1.07513e-08
Hist1h2al	4.14641e-13	2.78662	0.098	0.009	1.11227e-08
Mcm8	4.19554e-13	2.62955	0.25	0.064	1.12545e-08
Cenpc1	4.20627e-13	1.69132	0.688	0.42	1.12833e-08
Mnd1	4.51755e-13	2.11444	0.277	0.078	1.21183e-08
Eri2	5.33184e-13	1.71964	0.295	0.087	1.43027e-08
Ldlr	5.53647e-13	1.59595	0.625	0.315	1.48516e-08
Clgn	7.96535e-13	1.59476	0.527	0.244	2.1367e-08
Acsm3	9.2893e-13	1.27017	0.205	0.045	2.49185e-08
Gem	1.07846e-12	1.08928	0.875	0.601	2.89297e-08
Gemin6	1.08379e-12	1.82659	0.357	0.123	2.90727e-08
Usp1	1.17417e-12	1.06937	0.688	0.387	3.1497e-08
2310002F09Rik	1.19069e-12	1.65852	0.455	0.188	3.19402e-08
Mis12	1.29171e-12	1.0298	0.652	0.36	3.46502e-08
Gm21596	1.40572e-12	1.13101	0.616	0.285	3.77083e-08
AL589651.1	2.03662e-12	3.38026	0.071	0.005	5.46322e-08
Gm2383	2.08457e-12	1.44821	0.339	0.107	5.59187e-08
RP23-447N11.2	2.11491e-12	2.3644	0.259	0.071	5.67326e-08
Ripk3	2.11575e-12	1.47111	0.741	0.424	5.6755e-08
Gm14820	2.2521e-12	1.88695	0.286	0.084	6.04125e-08
Gm5507	2.26173e-12	2.33044	0.312	0.092	6.0671e-08
Pole	2.29848e-12	1.67654	0.402	0.154	6.16569e-08
Asrgl1	2.56421e-12	1.33891	0.491	0.217	6.87848e-08
Ccna1	2.57428e-12	9.56778	0.062	0.003	6.9055e-08
Fdps	2.60334e-12	1.20299	0.696	0.412	6.98345e-08
Katnb1	2.7417e-12	1.31921	0.589	0.305	7.35461e-08
Gm13461	2.9405e-12	2.22464	0.152	0.026	7.88789e-08
Gm7729	3.11986e-12	1.16555	0.375	0.122	8.36902e-08
Faap24	3.34286e-12	1.52283	0.446	0.194	8.96722e-08
Cep128	3.47384e-12	1.94117	0.295	0.092	9.31858e-08
Hist1h2bk	3.58927e-12	3.42421	0.08	0.007	9.62821e-08
Pomt1	3.86932e-12	2.44927	0.643	0.354	1.03794e-07
Gm38327	4.02684e-12	1.47261	0.241	0.062	1.0802e-07
Gm8756	4.22238e-12	1.65438	0.277	0.076	1.13265e-07
Cit	4.64052e-12	2.08621	0.946	0.885	1.24482e-07
1810055G02Rik	5.04624e-12	1.28726	0.527	0.242	1.35365e-07
Pkmyt1	5.52151e-12	1.83406	0.598	0.345	1.48115e-07
Mphosph9	5.52994e-12	1.4488	0.411	0.161	1.48341e-07
Opa3	5.7933e-12	1.22558	0.723	0.457	1.55405e-07
Plxnd1	6.54129e-12	1.0316	0.92	0.738	1.7547e-07
Chaf1a	7.19308e-12	2.33331	0.321	0.111	1.92954e-07
Epha2	7.26655e-12	1.42865	0.643	0.381	1.94925e-07
Suv39h1	7.63324e-12	1.8086	0.464	0.207	2.04762e-07
Nudt1	8.42684e-12	1.74985	0.5	0.246	2.2605e-07
Ppap2c	8.60563e-12	1.02495	0.714	0.451	2.30846e-07
Entpd7	9.55953e-12	1.16499	0.429	0.167	2.56434e-07
Acat1	9.64746e-12	1.04243	0.911	0.761	2.58793e-07
Mrc1	1.0186e-11	1.35052	0.786	0.514	2.73238e-07
Sgcd	1.03427e-11	1.01294	0.411	0.155	2.77443e-07
Mthfd2	1.13361e-11	1.93409	0.348	0.128	3.04092e-07
Pola1	1.14694e-11	1.83508	0.384	0.153	3.07665e-07
Rfwd3	1.18086e-11	1.12063	0.58	0.291	3.16765e-07
Nup43	1.1884e-11	1.8664	0.339	0.122	3.18789e-07
Gm24574	1.44699e-11	1.00524	0.554	0.245	3.88154e-07
Glipr2	1.48715e-11	1.2245	0.705	0.419	3.98929e-07
Gm12522	2.32781e-11	7.2409	0.045	0.001	6.24436e-07
Prim2	2.37722e-11	1.85491	0.509	0.266	6.3769e-07
Exo1	2.46536e-11	2.74735	0.277	0.086	6.61333e-07
Prmt5	2.54555e-11	1.04	0.714	0.442	6.82844e-07
2700029M09Rik	2.56579e-11	1.01079	0.705	0.453	6.88274e-07
RP23-38L11.2	2.5688e-11	1.10013	0.518	0.229	6.89081e-07
Ccdc61	2.58923e-11	1.03939	0.723	0.447	6.9456e-07
Kctd9	2.61905e-11	1.23603	0.625	0.332	7.02559e-07
3010026O09Rik	2.64227e-11	2.11942	0.366	0.144	7.0879e-07
Mroh8	2.79466e-11	1.10344	0.83	0.543	7.49666e-07
Cyth4	2.81612e-11	1.15632	0.705	0.414	7.55424e-07
Hmgn5	2.98862e-11	1.03804	0.759	0.458	8.01697e-07
RP24-324L19.3	3.03841e-11	1.37458	0.312	0.099	8.15053e-07
Gm13902	3.16117e-11	2.27006	0.089	0.009	8.47984e-07
Peg3	3.78096e-11	1.14108	0.705	0.4	1.01424e-06
Ccz1	4.17386e-11	1.00673	0.786	0.51	1.11964e-06
Slc1a5	4.55436e-11	1.30007	0.759	0.515	1.22171e-06
Gm26770	4.9981e-11	1.16322	0.482	0.217	1.34074e-06
U2af1	5.94551e-11	1.05944	0.777	0.506	1.59488e-06
Matn2	6.05875e-11	1.79037	0.545	0.306	1.62526e-06
Hapln1	6.1784e-11	1.63743	0.277	0.088	1.65736e-06
Myo1e	6.60355e-11	1.50628	0.688	0.437	1.7714e-06
Haus6	6.62597e-11	1.51931	0.375	0.152	1.77742e-06
Ccne1	6.88098e-11	3.86947	0.179	0.042	1.84582e-06
Xrcc2	7.04238e-11	1.76978	0.259	0.08	1.88912e-06
Gpx3	7.60233e-11	1.71783	0.804	0.611	2.03932e-06
Cdkn2aipnl	8.51151e-11	1.05779	0.83	0.593	2.28321e-06
Tarsl2	9.1497e-11	1.58932	0.429	0.192	2.45441e-06
Fam49a	9.26088e-11	1.01766	0.652	0.363	2.48423e-06
Fbln1	1.08502e-10	2.53088	0.241	0.07	2.91056e-06
Ino80c	1.16288e-10	1.01439	0.705	0.449	3.11944e-06
Ccdc77	1.341e-10	1.4275	0.527	0.271	3.59723e-06
Kcnab2	1.34651e-10	1.85404	0.25	0.076	3.61202e-06
Gm20628	1.44383e-10	2.00448	0.259	0.081	3.87307e-06
Chchd6	1.5133e-10	1.17456	0.598	0.334	4.05942e-06
Zfp459	1.58689e-10	1.04653	0.223	0.057	4.25684e-06
Gm7030	1.60476e-10	2.44417	0.125	0.021	4.30477e-06
Primpol	1.82251e-10	1.6198	0.295	0.103	4.88888e-06
BC024978	1.86376e-10	1.04594	0.696	0.418	4.99952e-06
Gm9008	2.06752e-10	1.44933	0.348	0.125	5.54613e-06
Ankrd33b	2.31033e-10	1.97167	0.384	0.161	6.19747e-06
Timm22	2.39727e-10	1.01529	0.768	0.503	6.43068e-06
Hist1h1a	2.62569e-10	4.56319	0.062	0.005	7.04341e-06
Nup62	2.6545e-10	1.25675	0.741	0.485	7.12071e-06
Hist1h4f	2.67083e-10	3.0849	0.062	0.005	7.1645e-06
Rfc4	2.68993e-10	1.71148	0.455	0.233	7.21575e-06
Mlkl	2.83719e-10	1.26838	0.571	0.307	7.61076e-06
2200002J24Rik	2.91849e-10	9.54783	0.027	0	7.82885e-06
RP24-374B14.4	2.91849e-10	9.49042	0.027	0	7.82885e-06
Gm25008	2.91849e-10	8.66228	0.027	0	7.82885e-06
AL589651.2	2.91849e-10	6.66871	0.027	0	7.82885e-06
Suv39h2	2.98753e-10	1.76112	0.232	0.068	8.01405e-06
Cep192	2.99958e-10	1.32366	0.446	0.211	8.04636e-06
Nmral1	3.03344e-10	1.68025	0.411	0.182	8.13721e-06
Raet1d	3.50842e-10	1.99256	0.223	0.064	9.41134e-06
Afmid	3.54483e-10	2.00224	0.277	0.091	9.509e-06
Hist2h3b	3.59094e-10	1.41412	0.089	0.011	9.63269e-06
Mdm1	3.81847e-10	1.81769	0.339	0.138	1.0243e-05
Nup107	4.53639e-10	1.08242	0.482	0.231	1.21689e-05
Pld5	4.73779e-10	1.76919	0.509	0.275	1.27091e-05
Sdf2l1	4.81589e-10	1.24169	0.482	0.244	1.29186e-05
Serpina3i	5.12056e-10	1.28519	0.509	0.251	1.37359e-05
Suz12	5.29905e-10	1.14615	0.455	0.211	1.42147e-05
Mcm10	5.50007e-10	3.16833	0.179	0.045	1.47539e-05
Cep57l1	5.84092e-10	1.6776	0.429	0.2	1.56683e-05
Dpcd	5.9947e-10	1.0834	0.723	0.472	1.60808e-05
Cd68	6.36031e-10	1.37834	0.366	0.145	1.70615e-05
Ctc1	6.45689e-10	1.38582	0.545	0.305	1.73206e-05
Gm5652	6.91459e-10	2.34174	0.161	0.036	1.85484e-05
Dnah8	7.18636e-10	3.37719	0.134	0.026	1.92774e-05
Oxct1	8.35761e-10	1.58978	0.616	0.378	2.24193e-05
Gm12715	8.41524e-10	1.48723	0.446	0.2	2.25739e-05
Haus8	8.84413e-10	1.86988	0.661	0.393	2.37244e-05
Cep112	1.03553e-09	1.57516	0.33	0.132	2.77781e-05
Tnfaip3	1.05484e-09	1.46887	0.482	0.24	2.82962e-05
Maz	1.07719e-09	1.23035	0.616	0.371	2.88957e-05
Lclat1	1.08522e-09	1.19109	0.509	0.266	2.9111e-05
Zbtb7c	1.09434e-09	1.02343	0.607	0.321	2.93557e-05
Mb21d1	1.12932e-09	2.33291	0.205	0.057	3.0294e-05
Palld	1.26476e-09	1.64325	0.571	0.328	3.39273e-05
Gm20406	1.27265e-09	1.1813	0.33	0.123	3.41388e-05
Gm13024	1.28108e-09	1.57251	0.161	0.036	3.4365e-05
Sox11	1.35189e-09	2.14457	0.25	0.08	3.62645e-05
Etv4	1.41334e-09	1.9281	0.232	0.072	3.79127e-05
Gm37127	1.45637e-09	7.55105	0.062	0.005	3.90671e-05
Gm2308	1.5129e-09	1.41253	0.384	0.161	4.05836e-05
Gm6461	1.60567e-09	1.72065	0.152	0.032	4.30722e-05
Wdr90	1.78936e-09	1.81341	0.214	0.064	4.79995e-05
Gm38339	1.83019e-09	4.32468	0.062	0.005	4.9095e-05
Ppm1b	1.85476e-09	1.07749	0.5	0.233	4.9754e-05
Whsc1	1.90732e-09	1.06592	0.688	0.426	5.1164e-05
Micall2	1.9372e-09	1.6183	0.348	0.139	5.19653e-05
2610318N02Rik	2.00839e-09	2.35737	0.098	0.015	5.3875e-05
Dhfr	2.15589e-09	1.96497	0.366	0.162	5.78317e-05
Rhno1	2.20699e-09	1.20724	0.58	0.337	5.92024e-05
Gm27972	2.24512e-09	2.66834	0.098	0.015	6.02253e-05
4933412A08Rik	2.57216e-09	1.05027	0.42	0.187	6.89982e-05
Pnp2	2.84199e-09	2.25884	0.161	0.038	7.62364e-05
Arhgap33	2.99815e-09	3.13935	0.214	0.065	8.04253e-05
Rdm1	3.18503e-09	1.19305	0.446	0.225	8.54385e-05
Fanci	3.23275e-09	1.77439	0.455	0.227	8.67186e-05
Lnp	3.36097e-09	1.47309	0.375	0.163	9.0158e-05
Ppil1	3.91671e-09	1.00961	0.661	0.402	0.000105066
Paip2b	4.38844e-09	1.50351	0.429	0.209	0.00011772
Gm8824	4.40589e-09	1.07988	0.366	0.144	0.000118188
Mre11a	4.43267e-09	1.00354	0.5	0.26	0.000118906
Adrbk1	5.06793e-09	1.02863	0.625	0.38	0.000135947
Ccdc163	5.14551e-09	1.29715	0.438	0.219	0.000138028
Agps	5.20398e-09	1.1089	0.527	0.272	0.000139597
Fcho1	5.4922e-09	1.81123	0.223	0.071	0.000147328
Arhgap18	5.56557e-09	1.26173	0.545	0.313	0.000149296
Dagla	5.67309e-09	1.21217	0.455	0.219	0.000152181
Nptxr	6.71539e-09	1.94277	0.411	0.201	0.00018014
Cep41	7.88278e-09	1.20036	0.411	0.193	0.000211456
Srd5a1	8.13142e-09	1.94836	0.295	0.119	0.000218125
Gm12925	8.80784e-09	1.87737	0.062	0.006	0.00023627
Sqle	8.88641e-09	1.29866	0.509	0.279	0.000238378
Mad2l1bp	8.8948e-09	1.08542	0.545	0.304	0.000238603
D030056L22Rik	9.831e-09	1.09996	0.455	0.228	0.000263717
Mcph1	9.985e-09	1.52907	0.339	0.144	0.000267848
Cep295	1.00121e-08	1.02658	0.598	0.367	0.000268575
Vip	1.01797e-08	7.06308	0.036	0.001	0.000273071
Gm9531	1.03008e-08	4.89509	0.036	0.001	0.00027632
Gm20667	1.03801e-08	9.44521	0.045	0.003	0.000278447
Gm12891	1.05473e-08	4.23866	0.036	0.001	0.000282931
Gm8579	1.0645e-08	1.8739	0.152	0.036	0.000285553
Mir511	1.06726e-08	4.83874	0.036	0.001	0.000286293
Nphp4	1.18994e-08	2.12651	0.205	0.062	0.0003192
RP24-392D22.2	1.24986e-08	1.8388	0.188	0.053	0.000335276
Mboat7	1.27392e-08	1.18337	0.446	0.219	0.000341729
Cep72	1.44685e-08	1.3703	0.223	0.073	0.000388118
Nup133	1.53135e-08	1.01893	0.58	0.356	0.000410784
Gm8349	1.71403e-08	1.03377	0.321	0.122	0.000459789
Hist1h2br	1.74159e-08	1.83435	0.214	0.067	0.000467183
Dnmt1	1.79846e-08	1.26743	0.616	0.393	0.000482438
Gm12416	2.11297e-08	2.32976	0.188	0.053	0.000566805
Ccdc180	2.12504e-08	1.08464	0.375	0.166	0.000570041
Wdr76	2.20839e-08	1.44793	0.295	0.116	0.0005924
Gm9211	2.21924e-08	1.6336	0.161	0.041	0.000595311
Rec114	2.24966e-08	1.89623	0.634	0.391	0.00060347
Hist1h4m	2.3283e-08	2.01758	0.071	0.009	0.000624568
Mcm2	2.35712e-08	1.46683	0.58	0.364	0.000632298
Hspb8	2.41439e-08	1.19884	0.554	0.309	0.000647659
Gm8927	2.51364e-08	1.20083	0.384	0.171	0.000674284
Gm8492	2.57474e-08	1.18347	0.25	0.083	0.000690673
Rtel1	2.59767e-08	1.59873	0.304	0.127	0.000696825
Pilra	2.64367e-08	2.17231	0.107	0.02	0.000709165
Pih1d2	2.65914e-08	2.30742	0.286	0.107	0.000713315
Gm8100	2.68484e-08	1.34337	0.179	0.049	0.00072021
Myo5a	2.72142e-08	1.35949	0.482	0.253	0.00073002
Brip1	2.73049e-08	4.37552	0.366	0.175	0.000732453
Thop1	2.82226e-08	1.32118	0.625	0.386	0.00075707
4933404O12Rik	2.86057e-08	2.51274	0.268	0.105	0.000767348
Gm7931	3.17359e-08	3.33369	0.054	0.005	0.000851316
Myof	3.43925e-08	1.16441	0.473	0.257	0.000922578
Fbxw4	3.74895e-08	1.22712	0.277	0.106	0.00100566
Phf7	3.75363e-08	1.48383	0.473	0.244	0.00100691
Tmem17	3.77099e-08	1.36869	0.33	0.14	0.00101157
Eri1	3.85536e-08	1.29521	0.509	0.286	0.0010342
Stk17b	3.92969e-08	1.45585	0.473	0.263	0.00105414
RP23-447N11.3	4.15522e-08	2.22299	0.321	0.14	0.00111464
Cxcr3	4.24734e-08	1.04194	0.277	0.104	0.00113935
Gm5388	4.46503e-08	1.11843	0.509	0.275	0.00119774
Gale	4.48705e-08	1.20879	0.536	0.31	0.00120365
Ddx20	4.58952e-08	1.10646	0.464	0.252	0.00123114
Spink2	4.59871e-08	2.14241	0.179	0.051	0.00123361
Tdp1	4.69009e-08	1.6139	0.366	0.171	0.00125812
RP24-152F23.2	4.90629e-08	1.59809	0.134	0.031	0.00131611
Urb2	4.92168e-08	1.62984	0.295	0.125	0.00132024
Gm6944	5.45e-08	1.29066	0.196	0.059	0.00146196
Nup155	5.46988e-08	1.04417	0.518	0.31	0.00146729
Gm15246	6.24867e-08	1.73846	0.071	0.009	0.0016762
Senp5	7.39709e-08	1.06031	0.384	0.178	0.00198427
Rem1	7.92018e-08	1.0166	0.518	0.29	0.00212459
Chaf1b	9.75221e-08	2.01469	0.473	0.275	0.00261603
Gm8908	1.0017e-07	5.62114	0.027	0.001	0.00268705
Gm22884	1.0017e-07	5.01332	0.027	0.001	0.00268705
Gm12238	1.0017e-07	5.01332	0.027	0.001	0.00268705
Gm6594	1.0056e-07	3.57744	0.045	0.003	0.00269753
Gm11336	1.0056e-07	3.1403	0.045	0.003	0.00269753
Gm13065	1.02914e-07	4.89602	0.027	0.001	0.00276067
Gm5593	1.04313e-07	4.37955	0.027	0.001	0.0027982
Gm28586	1.16391e-07	1.31103	0.17	0.048	0.00312218
Anapc15-ps	1.18124e-07	2.43529	0.062	0.007	0.00316867
Gm13292	1.22859e-07	1.7401	0.179	0.053	0.0032957
Neto2	1.26066e-07	3.49524	0.08	0.013	0.00338171
Gm8330	1.27171e-07	1.42919	0.214	0.07	0.00341137
Gm10654	1.43939e-07	3.91083	0.08	0.013	0.00386116
Gm12118	1.45418e-07	2.90091	0.054	0.005	0.00390085
Nme5	1.71223e-07	2.21235	0.134	0.034	0.00459307
Dhcr24	1.76376e-07	1.67726	0.366	0.175	0.00473129
Enkd1	1.84789e-07	1.29361	0.348	0.163	0.00495696
Gm7125	1.9018e-07	2.20344	0.08	0.013	0.00510158
Gm24289	1.9887e-07	4.12559	0.036	0.002	0.00533468
4930486L24Rik	1.99614e-07	1.13615	0.286	0.119	0.00535464
Gm11927	2.00868e-07	4.12691	0.036	0.002	0.00538829
RP24-81J14.1	2.00868e-07	3.82166	0.036	0.002	0.00538829
RP24-565B3.4	2.03023e-07	2.84068	0.125	0.03	0.00544608
2610203C22Rik	2.44076e-07	1.38763	0.277	0.115	0.00654734
RP24-475M20.4	2.47437e-07	1.0123	0.143	0.037	0.00663749
Gm29668	2.51438e-07	1.60255	0.223	0.078	0.00674483
Retnla	2.6863e-07	7.61382	0.018	0	0.007206
Gm27883	2.6863e-07	7.42646	0.018	0	0.007206
Arhgap20os	2.6863e-07	6.6186	0.018	0	0.007206
RP24-471B15.3	2.6863e-07	6.37598	0.018	0	0.007206
Kif22-ps	2.6863e-07	5.83266	0.018	0	0.007206
Gm26132	2.6863e-07	5.82517	0.018	0	0.007206
Aldh1a3	3.03428e-07	1.07801	0.554	0.325	0.00813945
Slc25a25	3.07127e-07	1.05698	0.42	0.222	0.00823867
Gm11892	3.07495e-07	2.83991	0.062	0.008	0.00824854
Ccne2	3.29851e-07	2.20902	0.384	0.196	0.00884824
Chil5	3.42332e-07	1.41957	0.402	0.209	0.00918305
Tmem106c	3.55893e-07	1.08594	0.438	0.241	0.00954683
Gm7293	3.68784e-07	1.27241	0.295	0.119	0.00989264
4930566F21Rik	4.00959e-07	1.06795	0.33	0.147	0.0107557
Ccdc14	4.0164e-07	1.52055	0.125	0.031	0.010774
Gm3222	4.1316e-07	1.64368	0.277	0.111	0.011083
BC023719	4.25662e-07	2.66266	0.134	0.036	0.0114184
Wipf2	4.7813e-07	1.39695	0.375	0.182	0.0128258
Myo18b	4.82979e-07	1.62177	0.223	0.083	0.0129559
Slc38a1	5.13167e-07	1.69536	0.107	0.024	0.0137657
Mov10l1	5.18907e-07	3.23988	0.054	0.006	0.0139197
Gm3756	5.4314e-07	2.12209	0.098	0.02	0.0145697
RP23-333I12.3	5.61271e-07	1.09768	0.268	0.108	0.0150561
2810408A11Rik	5.61747e-07	1.56866	0.214	0.08	0.0150689
Mir335	5.64467e-07	3.8511	0.045	0.004	0.0151418
Kdm8	5.69393e-07	1.24495	0.259	0.107	0.015274
Gm5832	5.76831e-07	2.602	0.054	0.006	0.0154735
Gm5523	6.16949e-07	1.51417	0.188	0.063	0.0165497
Gm15829	6.35725e-07	1.1273	0.25	0.097	0.0170533
BC022960	6.41565e-07	1.53105	0.08	0.014	0.01721
Npm3	6.8642e-07	1.35144	0.214	0.078	0.0184132
Gm4353	7.17528e-07	2.44209	0.08	0.014	0.0192477
Pf4	7.43055e-07	1.07331	0.196	0.069	0.0199324
Adcy7	7.65699e-07	2.24755	0.098	0.021	0.0205399
Hnrnpul2	7.67654e-07	1.01816	0.518	0.294	0.0205923
Hmbox1	7.87703e-07	1.1184	0.473	0.249	0.0211301
Fads2	8.20622e-07	1.30025	0.205	0.074	0.0220132
RP23-169H9.6	8.23237e-07	1.03494	0.33	0.155	0.0220833
Ccdc92	8.38298e-07	1.2809	0.429	0.238	0.0224873
Blm	8.43722e-07	1.25242	0.179	0.059	0.0226328
Gm22396	8.46074e-07	1.24372	0.143	0.04	0.0226959
Tubb4a	8.48091e-07	2.05808	0.098	0.021	0.02275
RP23-391P21.2	8.56961e-07	1.36226	0.429	0.228	0.022988
9430015G10Rik	8.74753e-07	1.57218	0.348	0.177	0.0234653
Gm11715	8.98539e-07	1.07599	0.393	0.197	0.0241033
Zswim7	9.06735e-07	1.3858	0.304	0.14	0.0243232
Gm11527	9.10065e-07	1.15633	0.098	0.021	0.0244125
Fancd2os	9.33385e-07	1.96672	0.071	0.011	0.025038
Slc41a2	9.73233e-07	1.09217	0.321	0.15	0.026107
Mmp15	9.81125e-07	1.59732	0.393	0.204	0.0263187
Akr1b8	9.99569e-07	1.25201	0.393	0.213	0.0268134
Gm14133	1.0127e-06	1.00433	0.366	0.172	0.0271656
Pdss1	1.03306e-06	1.586	0.357	0.181	0.0277118
Gm28045	1.15205e-06	1.01577	0.482	0.287	0.0309038
Sclt1	1.18488e-06	1.34877	0.357	0.184	0.0317845
Hmgb1-rs18	1.21375e-06	1.21261	0.196	0.067	0.0325587
Shc3	1.23922e-06	2.52171	0.116	0.029	0.033242
Nsdhl	1.28741e-06	1.05796	0.482	0.287	0.0345349
Ly6g	1.31804e-06	1.46182	0.188	0.065	0.0353565
Rpa2	1.3573e-06	1.07276	0.589	0.409	0.0364095
Cdk3-ps	1.37713e-06	1.12918	0.223	0.083	0.0369414
Gm4575	1.41575e-06	2.41234	0.089	0.018	0.0379775
Gp9	1.42343e-06	1.91835	0.214	0.083	0.0381836
Gm5187	1.42728e-06	1.20716	0.205	0.074	0.0382867
Eefsec	1.62331e-06	1.0116	0.438	0.252	0.0435454
Dhcr7	1.63753e-06	1.34005	0.527	0.313	0.0439267
Gm20404	1.66846e-06	1.5161	0.125	0.033	0.0447565
Gm13882	1.78688e-06	1.42153	0.179	0.059	0.047933
Tbc1d31	1.79796e-06	2.01544	0.196	0.073	0.0482304
Gm19807	1.85473e-06	4.53779	0.036	0.003	0.0497531
Gm11223	1.88702e-06	3.76335	0.036	0.003	0.0506193
RP23-205A7.1	1.88706e-06	2.30822	0.054	0.007	0.0506205
RP24-230D18.1	1.90336e-06	3.48133	0.036	0.003	0.0510578
Nfatc2ip	2.06418e-06	1.1273	0.179	0.062	0.0553716
Gm4918	2.13455e-06	1.2341	0.223	0.084	0.0572592
Med9os	2.22284e-06	1.78377	0.098	0.022	0.0596278
Gm7722	2.27819e-06	1.76371	0.107	0.026	0.0611126
Dut	2.33618e-06	1.01029	0.589	0.393	0.0626679
Pole4	2.43494e-06	1.14227	0.518	0.341	0.0653173
Gm29083	2.47176e-06	1.2529	0.116	0.03	0.0663051
Gm9358	2.47823e-06	1.84498	0.188	0.065	0.0664784
Brca2	2.48357e-06	1.60233	0.402	0.213	0.0666217
Gm34342	2.50704e-06	1.70103	0.08	0.016	0.0672513
Gm4204	2.52467e-06	1.27493	0.161	0.051	0.0677244
Gtpbp2	2.52843e-06	1.01237	0.554	0.359	0.0678251
Zfp518b	2.78819e-06	1.26693	0.223	0.088	0.0747932
Gm38067	2.85107e-06	2.02145	0.08	0.016	0.07648
Mxra7	2.9043e-06	1.11357	0.518	0.317	0.0779079
Gm7456	2.96699e-06	1.37541	0.143	0.042	0.0795895
Isoc2b	2.9898e-06	1.58212	0.286	0.13	0.0802014
Ankrd26	3.23761e-06	1.10054	0.33	0.154	0.0868488
Gm12017	3.25859e-06	1.22493	0.232	0.09	0.0874117
Mlec	3.31714e-06	1.25588	0.429	0.25	0.0889824
Rbm46	3.42407e-06	4.85307	0.027	0.001	0.0918507
RP23-265P8.4	3.49771e-06	4.20885	0.027	0.001	0.0938262
RP24-79O7.3	3.49771e-06	4.14667	0.027	0.001	0.0938262
Cldn18	3.49771e-06	3.72476	0.027	0.001	0.0938262
Gm11185	3.52702e-06	1.43985	0.214	0.08	0.0946124
Chrm4	3.5351e-06	3.76821	0.027	0.001	0.0948291
Cd247	3.60556e-06	1.53864	0.411	0.233	0.0967192
C920025E04Rik	3.63568e-06	2.97291	0.268	0.124	0.0975271
Ccp110	3.71881e-06	1.03036	0.304	0.147	0.0997571
Gm23417	3.77987e-06	2.00317	0.098	0.023	0.101395
Mcm7	3.82648e-06	1.07066	0.696	0.499	0.102645
Tnnt2	3.8776e-06	1.75771	0.152	0.049	0.104017
Gm10123	3.94558e-06	1.91907	0.098	0.023	0.10584
Ly6f	3.95481e-06	2.21166	0.089	0.02	0.106088
Cep78	3.98858e-06	1.47136	0.241	0.101	0.106994
Saxo2	4.12374e-06	5.32162	0.062	0.01	0.110619
RP24-512F21.1	4.19427e-06	1.86171	0.107	0.027	0.112511
Map1a	4.71268e-06	1.08676	0.232	0.098	0.126418
Pgam1-ps1	4.7171e-06	1.22065	0.125	0.034	0.126536
Mir6981	4.74977e-06	2.83717	0.062	0.01	0.127413
Gm25991	4.8106e-06	2.80629	0.054	0.007	0.129044
Slc9a5	4.91116e-06	2.85765	0.098	0.024	0.131742
Gm13464	4.94929e-06	1.96195	0.107	0.027	0.132765
BC055324	5.00606e-06	1.56011	0.321	0.16	0.134288
Gm26720	5.02156e-06	1.98139	0.214	0.082	0.134703
Gm10357	5.1222e-06	2.26805	0.054	0.007	0.137403
Arhgap30	5.25191e-06	1.25512	0.134	0.039	0.140882
Cd44	5.32767e-06	1.30647	0.393	0.225	0.142915
Gm5527	5.33265e-06	1.63127	0.08	0.016	0.143048
Fads3	6.05418e-06	1.59676	0.312	0.156	0.162403
Dck	6.2694e-06	1.21155	0.482	0.308	0.168177
Hmgb1-ps7	6.30693e-06	1.54205	0.161	0.053	0.169183
Mettl6	6.39638e-06	1.09034	0.429	0.248	0.171583
Trmt10a	7.00034e-06	1.30775	0.429	0.246	0.187784
Gm16568	7.03613e-06	1.18875	0.188	0.07	0.188744
Gm11214	7.05814e-06	1.41621	0.089	0.02	0.189335
Gm12953	7.5862e-06	1.44687	0.116	0.032	0.2035
Proser3	7.73588e-06	2.219	0.188	0.075	0.207515
Trp53tg5	7.87131e-06	1.84118	0.08	0.017	0.211148
Hist1h4h	7.90434e-06	1.03236	0.134	0.04	0.212034
4930558J18Rik	7.93437e-06	6.27986	0.045	0.005	0.212839
Adrb2	7.97298e-06	1.04815	0.679	0.507	0.213875
1700026L06Rik	8.61985e-06	3.33766	0.045	0.005	0.231228
Gm13838	8.73021e-06	2.43017	0.045	0.005	0.234188
Gm14892	8.76855e-06	1.17234	0.125	0.036	0.235216
Smim3	8.85488e-06	1.01233	0.286	0.138	0.237532
5730416F02Rik	8.95499e-06	2.58752	0.045	0.005	0.240218
Smarce1-ps1	8.95499e-06	2.58301	0.045	0.005	0.240218
Lmo1	9.0102e-06	1.10716	0.545	0.337	0.241699
RP24-86I23.4	9.22692e-06	1.14231	0.196	0.074	0.247512
Tmem107	9.48191e-06	1.44879	0.304	0.146	0.254352
2700049A03Rik	9.49738e-06	1.04072	0.366	0.192	0.254767
Ccsap	9.52309e-06	2.45561	0.098	0.025	0.255457
Gm12109	1.03736e-05	1.48904	0.125	0.036	0.278271
Ccdc151	1.05557e-05	4.51194	0.036	0.003	0.283157
Serpina3k	1.06359e-05	2.42548	0.036	0.003	0.285308
1700006J14Rik	1.06411e-05	1.96111	0.062	0.011	0.285447
Ccdc65	1.07167e-05	2.56957	0.036	0.003	0.287474
Prnp	1.089e-05	1.39897	0.777	0.646	0.292124
Dzip1	1.09625e-05	3.06615	0.036	0.003	0.294068
Gm5898	1.11293e-05	2.70821	0.036	0.003	0.298544
Adhfe1	1.12528e-05	1.16391	0.143	0.046	0.301857
RP24-267O6.1	1.20889e-05	1.04197	0.196	0.077	0.324284
Prpsap2	1.2714e-05	1.10015	0.312	0.162	0.341052
Pank1	1.27433e-05	2.48885	0.125	0.038	0.341839
Gm9999	1.30414e-05	2.23935	0.098	0.025	0.349835
4833417C18Rik	1.33387e-05	1.55659	0.179	0.067	0.35781
Mir762	1.42474e-05	1.0036	0.232	0.099	0.382186
Lin54	1.48509e-05	1.01438	0.312	0.166	0.398377
Gm5844	1.48955e-05	1.46333	0.134	0.043	0.399573
Sapcd1	1.66946e-05	1.06701	0.304	0.152	0.447833
Gm6946	1.71593e-05	1.88546	0.089	0.022	0.460297
Gm9081	1.72882e-05	1.52711	0.143	0.047	0.463757
Gm17021	1.74587e-05	1.79199	0.089	0.022	0.46833
Gm7964	1.75033e-05	1.47801	0.116	0.033	0.469526
Gch1	1.80665e-05	1.00732	0.402	0.232	0.484633
Clrn3	1.90694e-05	1.52262	0.062	0.011	0.511537
Mir8115	1.9156e-05	1.87633	0.062	0.011	0.51386
Mir21a	1.9465e-05	1.7368	0.125	0.039	0.522148
Gm1818	1.95152e-05	1.01805	0.232	0.101	0.523495
Gm24497	1.99523e-05	1.93102	0.062	0.011	0.535221
Rpl28-ps1	2.00122e-05	1.22019	0.205	0.082	0.536827
Sdk1	2.09436e-05	1.04064	0.089	0.022	0.561813
Gstcd	2.116e-05	1.67445	0.33	0.171	0.567616
Zfp64	2.12235e-05	1.20158	0.411	0.247	0.569321
Gm10327	2.12809e-05	1.06956	0.152	0.052	0.57086
Hmgb1-ps6	2.135e-05	1.86208	0.062	0.011	0.572713
Gm5121	2.15011e-05	1.30518	0.161	0.057	0.576766
Gm9164	2.15218e-05	1.4463	0.143	0.048	0.577322
RP24-291G12.3	2.15733e-05	1.96946	0.098	0.026	0.578703
Nlrc3	2.1956e-05	1.32499	0.366	0.212	0.58897
Sh2d5	2.24489e-05	1.10818	0.259	0.121	0.602191
Gm8172	2.28588e-05	1.15403	0.152	0.051	0.613188
Tmem106a	2.30091e-05	2.81454	0.232	0.107	0.617218
L3mbtl2	2.34643e-05	1.01959	0.446	0.291	0.62943
Lpcat2	2.43606e-05	1.15939	0.598	0.426	0.653472
Haus5	2.52063e-05	1.27472	0.438	0.303	0.67616
Hist2h2ab	2.5207e-05	2.63335	0.045	0.006	0.676179
Ankrd2	2.53094e-05	1.51464	0.312	0.159	0.678925
Gm11996	2.53545e-05	2.76716	0.045	0.006	0.680135
Gm15444	2.59527e-05	1.84611	0.045	0.006	0.696181
1700010K24Rik	2.60025e-05	1.6932	0.054	0.009	0.697518
Gm38158	2.61043e-05	2.38953	0.045	0.006	0.700248
RP24-176P19.3	2.84501e-05	1.76756	0.054	0.009	0.763173
Suco	2.97147e-05	1.01405	0.446	0.27	0.797096
Fancm	3.00366e-05	1.0849	0.188	0.076	0.805731
Gm17249	3.02248e-05	1.30368	0.205	0.088	0.81078
8030451A03Rik	3.0287e-05	1.44749	0.179	0.07	0.81245
Mpzl3	3.10401e-05	1.67798	0.08	0.019	0.83265
Gm22879	3.29531e-05	1.21878	0.152	0.054	0.883968
Gm13379	3.44798e-05	1.36677	0.125	0.039	0.924921
Hells	3.52754e-05	1.27599	0.259	0.127	0.946263
Kif27	3.5815e-05	9.11965	0.027	0.002	0.960738
Gm37249	3.58708e-05	3.26175	0.062	0.012	0.962233
Gm38287	3.64773e-05	1.66121	0.339	0.193	0.978505
Hdac6	3.65408e-05	1.19624	0.429	0.268	0.980207
Hmgn2l6	3.67655e-05	3.78039	0.027	0.002	0.986234

## Sheet: Pik3caGOF prol BEC
Cell Type:	BEC
Dataset:	ECs from integrated healthy and Pik3ca GOF mutant mice					Petkova et al. 2023
Comaprison:	Proliferating cluster compared to tall other clusters
Up-regulated								Down-regulated
	p_val	avg_log2FC	pct.1	pct.2	p_val_adj				p_val	avg_log2FC	pct.1	pct.2	p_val_adj
Mir5134	8.68279e-118	7.79192	0.439	0.002	2.53069e-113			Hspb1	7.06664e-10	-1.91571	0.805	0.944	2.05964e-05
RP23-45G16.9	1.26449e-106	6.26732	0.683	0.02	3.68549e-102			Sepp1	1.97829e-07	-1.04551	1	0.997	0.00576592
Gm38037	4.16073e-99	10.2274	0.439	0.005	1.21269e-94			Ctsl	3.41715e-07	-1.32527	0.878	0.982	0.00995963
Bub1	2.47265e-97	8.63341	0.683	0.024	7.2068e-93			Fmo1	8.40591e-07	-2.09756	0.756	0.895	0.0244999
Gm14024	2.00266e-89	7.48774	0.488	0.01	5.83694e-85			Slfn5	8.42072e-07	-4.93286	0.366	0.649	0.024543
Kif18b	2.33844e-87	9.25599	0.488	0.011	6.81563e-83			Tspan13	1.18e-06	-1.13415	0.951	0.981	0.0343923
Hist1h2ab	1.06712e-85	8.10313	0.366	0.004	3.11022e-81			C1qtnf9	4.60194e-06	-1.45742	0.707	0.885	0.134128
Gm14091	9.91524e-77	6.75722	0.537	0.018	2.88989e-72			Ccnd2	1.3796e-05	-3.72715	0.659	0.807	0.402097
Hist1h2ak	1.51997e-75	6.51688	0.317	0.003	4.43011e-71			Id3	1.4745e-05	-1.3334	0.976	0.984	0.429758
Diap3	1.0063e-74	6.4598	0.707	0.041	2.93295e-70			Pink1	1.71391e-05	-1.66461	0.756	0.866	0.499537
AL590388.1	1.50048e-73	8.17667	0.293	0.002	4.3733e-69			Apoe	1.76944e-05	-1.0193	0.976	0.991	0.51572
Arhgef39	1.75878e-72	8.39459	0.488	0.016	5.12614e-68			Cd200	3.01513e-05	-1.89073	0.829	0.942	0.878789
Shcbp1	1.28947e-70	7.83706	0.683	0.04	3.75829e-66			Osmr	3.36204e-05	-2.25616	0.829	0.869	0.979899
Cep55	5.3423e-69	7.62952	0.707	0.047	1.55707e-64
Fam64a	6.55362e-65	8.21984	0.878	0.092	1.91012e-60
Depdc1a	2.06994e-64	7.44993	0.537	0.025	6.03305e-60
Cenpe	4.29224e-62	6.57525	0.78	0.07	1.25102e-57
Ect2	1.58168e-60	6.20408	0.707	0.055	4.60997e-56
Aspm	9.94311e-60	8.13809	0.61	0.039	2.89802e-55
Kif23	5.24565e-59	6.55389	0.854	0.095	1.5289e-54
Kif15	2.03186e-58	7.29088	0.756	0.07	5.92207e-54
Hist1h2af	4.88401e-58	5.91808	0.317	0.006	1.42349e-53
Sgol1	6.67743e-58	8.1543	0.512	0.026	1.9462e-53
4933413G19Rik	6.13992e-57	6.38549	0.341	0.009	1.78954e-52
Cenpk	1.32788e-54	5.25695	0.439	0.018	3.87023e-50
AC034285.2	1.38787e-54	6.13804	0.366	0.011	4.04509e-50
AL589651.4	1.84236e-54	10.2947	0.171	0	5.36975e-50
Cdkn3	1.90935e-54	5.65057	0.707	0.064	5.56499e-50
Ska1	2.47823e-54	6.56819	0.415	0.016	7.22306e-50
Ckap2	4.31931e-54	7.18659	0.854	0.107	1.25891e-49
Mis18bp1	8.68624e-54	7.68813	0.585	0.04	2.53169e-49
Cdca3	1.64654e-53	6.45159	0.927	0.135	4.79901e-49
Hist1h1b	4.30494e-53	8.75297	0.341	0.01	1.25472e-48
Troap	2.25011e-52	9.03257	0.488	0.027	6.55816e-48
AC034285.3	9.69021e-52	5.65569	0.293	0.006	2.82431e-47
Nek2	1.45218e-51	8.60883	0.683	0.062	4.23253e-47
Gen1	3.07858e-51	8.53228	0.317	0.009	8.97283e-47
Plk1	4.85774e-51	7.8058	0.854	0.112	1.41584e-46
BC030867	6.66875e-51	6.11621	0.341	0.011	1.94368e-46
Sapcd2	7.38577e-51	8.61695	0.537	0.035	2.15266e-46
Pif1	5.5816e-50	7.91948	0.366	0.013	1.62681e-45
Ttk	3.60963e-49	6.49778	0.488	0.029	1.05206e-44
Cenpw	1.77875e-48	4.61437	0.683	0.067	5.18435e-44
Ccnf	3.19355e-48	7.23701	0.659	0.063	9.30792e-44
Ccnb1	4.36033e-48	6.81468	0.829	0.112	1.27086e-43
Gtse1	7.75417e-48	4.64775	0.634	0.057	2.26003e-43
2700099C18Rik	7.93721e-48	3.64258	0.634	0.054	2.31338e-43
Gm11832	1.01877e-47	6.90935	0.22	0.003	2.9693e-43
Hist1h2an	1.69212e-47	7.76945	0.171	0.001	4.93184e-43
Gm22551	1.72835e-47	6.68356	0.244	0.004	5.03746e-43
Eldr	2.64071e-47	7.36146	0.293	0.008	7.6966e-43
Bub1b	1.75496e-46	5.6874	0.732	0.087	5.11499e-42
Cenpm	6.56838e-46	5.06892	0.561	0.045	1.91442e-41
Gng13	1.42611e-45	4.76915	0.341	0.013	4.15653e-41
Gm23634	2.08377e-45	4.64378	0.805	0.114	6.07337e-41
Sgol2a	9.47258e-45	5.09001	0.634	0.062	2.76088e-40
Ckap2l	1.01585e-44	7.30439	0.732	0.09	2.9608e-40
Melk	1.44397e-44	8.208	0.537	0.043	4.2086e-40
Kif2c	2.84472e-44	8.67288	0.61	0.059	8.29122e-40
Hist1h2bb	4.81647e-44	5.49858	0.22	0.004	1.40381e-39
Hist1h3c	1.63443e-43	5.38669	0.268	0.007	4.76371e-39
Aurkb	2.38668e-43	6.69934	0.707	0.087	6.95622e-39
Hist1h2ap	3.03222e-43	6.1558	0.561	0.048	8.83772e-39
Lmnb1	3.45211e-43	4.23388	0.756	0.097	1.00615e-38
Nusap1	7.64403e-43	5.47935	0.707	0.085	2.22793e-38
Foxm1	1.55469e-42	5.60433	0.659	0.074	4.53129e-38
Spc24	2.07614e-42	6.97592	0.78	0.12	6.05112e-38
Hist1h2ai	4.46307e-42	6.4428	0.244	0.006	1.30081e-37
Xkr5	8.15437e-42	5.90855	0.366	0.018	2.37667e-37
Ska3	1.14138e-41	6.75831	0.537	0.045	3.32667e-37
Hist1h2bm	3.55772e-41	6.73945	0.22	0.004	1.03693e-36
Brca1	8.52844e-41	5.85781	0.366	0.018	2.4857e-36
Hist1h2bf	8.582e-41	5.44455	0.195	0.003	2.50131e-36
Fancd2os	4.36223e-40	7.95009	0.146	0.001	1.27142e-35
Mki67	6.06588e-40	6.21401	0.951	0.219	1.76796e-35
Rad54b	1.05874e-39	4.69784	0.439	0.03	3.0858e-35
Hist1h2ag	1.52996e-39	3.82559	0.293	0.011	4.45922e-35
Trip13	1.85827e-39	5.82384	0.439	0.031	5.41612e-35
Cenpp	2.11793e-39	4.0449	0.463	0.033	6.17292e-35
Anln	2.2521e-39	6.30196	0.78	0.129	6.56398e-35
Spc25	3.89712e-39	6.84263	0.659	0.082	1.13585e-34
Oip5	4.48856e-39	4.90783	0.415	0.027	1.30824e-34
Ndc80	8.74833e-39	4.76619	0.585	0.061	2.54979e-34
Arhgap19	1.66598e-38	6.29696	0.488	0.04	4.85566e-34
Clspn	1.78468e-38	5.24911	0.463	0.035	5.20162e-34
Kif22	2.6603e-38	5.84591	0.78	0.13	7.75371e-34
Hist1h3i	2.76152e-38	4.74309	0.22	0.005	8.04871e-34
Cdca2	2.76306e-38	5.69415	0.585	0.062	8.0532e-34
Pbk	3.74685e-38	7.57218	0.659	0.083	1.09206e-33
Knstrn	6.80835e-38	6.68168	0.732	0.111	1.98436e-33
RP23-114E15.17	1.40656e-37	4.37943	0.366	0.021	4.09956e-33
Birc5	1.60131e-37	6.74643	0.902	0.208	4.66719e-33
Uhrf1	3.20414e-37	6.21895	0.61	0.072	9.33879e-33
Phf19	6.58183e-37	5.89174	0.39	0.025	1.91834e-32
Cdc25c	7.99827e-37	7.51748	0.463	0.038	2.33117e-32
Mad2l1	2.51076e-36	4.22773	0.756	0.124	7.31786e-32
Tpx2	3.19951e-36	6.41348	0.878	0.196	9.3253e-32
Cenpn	1.17603e-35	5.30885	0.488	0.045	3.42764e-31
Cdc20	1.85677e-35	5.01045	0.951	0.251	5.41175e-31
Cks2	2.10332e-35	5.10576	0.854	0.183	6.13035e-31
Cdca8	3.0462e-35	6.12492	0.829	0.168	8.87847e-31
Parpbp	5.94308e-35	5.59176	0.415	0.031	1.73217e-30
Cdca5	9.0662e-35	7.94147	0.415	0.032	2.64243e-30
Kif20b	1.79771e-34	4.56325	0.561	0.064	5.23959e-30
Cdk1	1.92097e-34	5.54332	0.854	0.181	5.59885e-30
Kifc1	4.04625e-34	8.34741	0.22	0.006	1.17932e-29
Fancd2	6.9728e-34	6.45164	0.341	0.021	2.03229e-29
Ncapd2	1.32505e-33	4.49286	0.902	0.225	3.86199e-29
Prc1	1.35028e-33	7.01942	0.829	0.185	3.93552e-29
Kif11	1.78739e-33	7.73486	0.61	0.084	5.20952e-29
Ccnb2	4.77821e-33	5.88935	0.902	0.238	1.39266e-28
Polq	6.38629e-33	5.08598	0.317	0.018	1.86135e-28
Mastl	1.01399e-32	3.92096	0.537	0.061	2.95538e-28
Hist1h2bj	1.41843e-32	5.56579	0.195	0.005	4.13415e-28
Arhgap11a	1.89363e-32	5.12799	0.415	0.034	5.51917e-28
Tacc3	2.45999e-32	4.74388	0.829	0.179	7.16989e-28
Top2a	2.58296e-32	7.35638	0.854	0.215	7.52828e-28
Tk1	5.86182e-32	6.49284	0.829	0.195	1.70849e-27
Gm7856	8.47871e-32	8.70251	0.098	0	2.47121e-27
Gm12856	8.47871e-32	8.58135	0.098	0	2.47121e-27
Rrm2	9.31779e-32	6.04516	0.707	0.127	2.71576e-27
Stil	1.38812e-31	6.2829	0.293	0.016	4.04582e-27
Hist1h2aa	2.53513e-31	5.54478	0.171	0.004	7.38889e-27
AL606464.1	2.53513e-31	5.54478	0.171	0.004	7.38889e-27
Hist1h2bg	3.4257e-31	5.88255	0.244	0.01	9.98454e-27
AL589651.3	5.27205e-31	5.98199	0.146	0.002	1.53659e-26
Nuf2	1.3969e-30	7.52584	0.634	0.105	4.0714e-26
Hist1h4i	1.94851e-30	3.85214	0.439	0.041	5.67912e-26
Hist1h2ae	2.19538e-30	5.70184	0.439	0.043	6.39864e-26
Espl1	2.2958e-30	7.37345	0.512	0.061	6.69135e-26
1190002F15Rik	3.36312e-30	4.86952	0.756	0.165	9.80216e-26
H1fx	4.80791e-30	4.41732	0.366	0.027	1.40131e-25
Zwilch	1.16112e-29	4.51724	0.439	0.043	3.38419e-25
Ube2c	1.336e-29	7.14288	0.756	0.169	3.89391e-25
Asf1b	1.35101e-29	6.15719	0.512	0.062	3.93766e-25
Casc5	2.39473e-29	6.77563	0.707	0.134	6.97969e-25
Ncapg2	3.48306e-29	4.62049	0.585	0.084	1.01517e-24
2810417H13Rik	4.22901e-29	5.39817	0.78	0.183	1.23259e-24
Cenpf	1.69802e-28	6.61812	0.805	0.198	4.94904e-24
Lctl	1.87252e-28	4.33195	0.244	0.011	5.45764e-24
AC125099.2	2.14137e-28	4.13433	0.293	0.018	6.24122e-24
Aurka	3.4247e-28	5.09974	0.537	0.074	9.98164e-24
Cks1b	5.82152e-28	3.65717	0.854	0.226	1.69674e-23
Mtfr2	6.25268e-28	8.26563	0.146	0.003	1.82241e-23
Iqgap3	1.04361e-27	7.73922	0.732	0.162	3.04169e-23
1700097N02Rik	1.58141e-27	4.92961	0.366	0.031	4.60919e-23
Dbf4	1.58861e-27	3.79957	0.683	0.128	4.63016e-23
Mns1	1.68776e-26	4.3833	0.488	0.061	4.91914e-22
Neil3	2.56077e-26	6.68503	0.732	0.179	7.46363e-22
Trim59	2.70913e-26	4.18786	0.634	0.115	7.89603e-22
Cenpa	4.77056e-26	4.82882	0.805	0.222	1.39043e-21
Spag5	5.18517e-26	6.56374	0.439	0.052	1.51127e-21
Ndc1	5.74108e-26	3.83607	0.707	0.15	1.67329e-21
Chtf18	8.59445e-26	5.00607	0.39	0.04	2.50494e-21
C330027C09Rik	8.93159e-26	5.15095	0.537	0.08	2.6032e-21
Esco2	1.15043e-25	7.74717	0.463	0.06	3.35304e-21
Fam83d	1.50852e-25	5.86873	0.512	0.073	4.39673e-21
Ccna2	1.79749e-25	5.39066	0.927	0.357	5.23895e-21
Hist1h3h	1.87382e-25	8.69929	0.098	0.001	5.46144e-21
AL589651.1	2.75023e-25	5.96527	0.146	0.004	8.01582e-21
Depdc1b	2.82378e-25	7.62122	0.146	0.004	8.2302e-21
Pmch	3.63826e-25	5.01406	0.22	0.011	1.06041e-20
Aunip	5.49018e-25	9.15854	0.171	0.006	1.60017e-20
Gm26765	5.72934e-25	2.44475	0.732	0.144	1.66987e-20
Gm28535	1.10018e-24	3.65673	0.171	0.006	3.20658e-20
Hmmr	1.20131e-24	5.9017	0.732	0.182	3.50134e-20
Hist1h4k	1.9649e-24	5.14863	0.122	0.002	5.72689e-20
Hist1h2bk	2.02547e-24	5.38886	0.122	0.002	5.90344e-20
Ncapg	2.95187e-24	4.51607	0.683	0.153	8.60353e-20
AC122428.1	4.32924e-24	3.8514	0.634	0.121	1.2618e-19
2810408I11Rik	4.80043e-24	4.45274	0.366	0.038	1.39913e-19
Incenp	5.42702e-24	4.20106	0.61	0.118	1.58176e-19
Ube2t	6.74844e-24	4.41628	0.439	0.057	1.9669e-19
Cenph	9.9051e-24	5.39467	0.537	0.089	2.88694e-19
Ccdc18	2.53545e-23	4.28303	0.317	0.028	7.38981e-19
Stmn1	2.85362e-23	4.68542	0.902	0.395	8.31716e-19
Smc2	3.03902e-23	3.21029	0.854	0.268	8.85753e-19
Hist2h2ac	3.24389e-23	4.04793	0.293	0.023	9.45464e-19
Bard1	3.77395e-23	3.75737	0.317	0.028	1.09995e-18
Mybl1	1.25919e-22	3.36455	0.244	0.016	3.67004e-18
Ncaph	5.11675e-22	4.39836	0.585	0.117	1.49133e-17
Gm2788	5.13353e-22	6.59102	0.171	0.007	1.49622e-17
Cenpu	1.99506e-21	3.58064	0.39	0.048	5.8148e-17
Hmgb2	2.61157e-21	3.42984	0.951	0.502	7.61167e-17
Hist1h4f	3.67476e-21	5.03101	0.098	0.001	1.07104e-16
Gm15792	4.41777e-21	2.53171	0.244	0.017	1.2876e-16
Fignl1	5.16136e-21	5.03196	0.366	0.044	1.50433e-16
Gm11491	6.78887e-21	2.20445	0.512	0.081	1.97868e-16
Ccsap	6.85605e-21	4.28137	0.244	0.018	1.99826e-16
Hist2h2bb	7.065e-21	5.29192	0.195	0.011	2.05917e-16
Psrc1	1.58764e-20	6.37533	0.463	0.077	4.62733e-16
Kif20a	2.37824e-20	4.77185	0.878	0.359	6.93163e-16
Lrr1	4.14338e-20	5.28004	0.22	0.015	1.20763e-15
H2afx	1.09715e-19	3.70046	0.878	0.326	3.19775e-15
Tubb6	1.37353e-19	3.3593	0.976	0.612	4.00328e-15
Hist1h2bp	1.45048e-19	5.99622	0.122	0.004	4.22756e-15
9630013D21Rik	1.45414e-19	2.04545	0.39	0.05	4.23822e-15
Tuba1c	1.47807e-19	2.95203	0.927	0.428	4.30798e-15
Hist1h1a	1.98478e-19	4.49405	0.122	0.004	5.78483e-15
Ercc6l	2.50261e-19	3.14239	0.366	0.047	7.29411e-15
Hist2h2bb.1	3.4703e-19	5.79531	0.195	0.012	1.01145e-14
Ankle1	4.07996e-19	9.00281	0.317	0.036	1.18915e-14
Spdl1	4.40872e-19	4.51776	0.317	0.035	1.28496e-14
Hist1h1d	8.33886e-19	3.58231	0.293	0.029	2.43045e-14
Lmnb2	8.62329e-19	2.77858	0.683	0.183	2.51334e-14
Fen1	1.01331e-18	3.07324	0.707	0.198	2.95341e-14
Fbxo5	1.40419e-18	3.28492	0.439	0.07	4.09266e-14
Pmf1	1.53421e-18	2.98662	0.78	0.27	4.4716e-14
4930558J22Rik	1.89274e-18	4.30733	0.22	0.016	5.51657e-14
Rbm44	2.75145e-18	11.7559	0.073	0.001	8.01938e-14
Hist1h2ad	3.07227e-18	5.3067	0.073	0.001	8.95444e-14
Gm26847	3.24529e-18	3.36198	0.22	0.016	9.45872e-14
Hist1h2bh	3.75934e-18	5.52361	0.098	0.002	1.0957e-13
Kif14	3.83898e-18	6.70093	0.268	0.026	1.11891e-13
Wdr62	4.02946e-18	3.26813	0.488	0.092	1.17443e-13
Dlgap5	4.98862e-18	4.63768	0.585	0.143	1.45398e-13
Ccdc34	5.08255e-18	2.23382	0.78	0.247	1.48136e-13
Gmnn	7.61401e-18	2.90814	0.561	0.123	2.21918e-13
Hist1h3g	9.91484e-18	4.87263	0.122	0.004	2.88978e-13
Hist1h4b	2.91256e-17	4.45524	0.22	0.018	8.48893e-13
Kif4	3.65927e-17	5.12518	0.634	0.188	1.06653e-12
Tmem107	3.94686e-17	1.76863	0.439	0.074	1.15035e-12
Ddias	5.57358e-17	3.49917	0.268	0.028	1.62448e-12
Ube2s	5.66207e-17	2.022	0.78	0.252	1.65027e-12
2700094K13Rik	6.94347e-17	2.6498	0.902	0.417	2.02374e-12
Kntc1	7.17895e-17	3.09637	0.341	0.046	2.09238e-12
Cntrob	9.71417e-17	2.49013	0.317	0.04	2.83129e-12
AI662270	1.06622e-16	3.30926	0.22	0.018	3.10761e-12
Gm14376	1.12891e-16	9.18466	0.049	0	3.29032e-12
Gm25862	1.12891e-16	8.87543	0.049	0	3.29032e-12
Hist1h2ah	1.12891e-16	8.13084	0.049	0	3.29032e-12
Gm16510	1.12891e-16	8.0271	0.049	0	3.29032e-12
Gm12387	1.12891e-16	8.02091	0.049	0	3.29032e-12
Nrm	1.48772e-16	2.48339	0.829	0.331	4.33611e-12
Lin9	1.54389e-16	3.51777	0.488	0.102	4.49983e-12
Hist1h3f	1.64805e-16	1.67068	0.195	0.014	4.80341e-12
Racgap1	1.65834e-16	5.23969	0.976	0.865	4.83339e-12
Dhfr	1.74881e-16	3.20557	0.512	0.111	5.09709e-12
Apitd1	1.97332e-16	2.89798	0.244	0.023	5.75144e-12
Slc9a5	1.98197e-16	2.62898	0.268	0.028	5.77666e-12
H2afz	2.22151e-16	1.96096	0.976	0.908	6.47482e-12
Plk4	2.39319e-16	3.03059	0.585	0.149	6.97518e-12
Hist1h2ac	4.01996e-16	3.69413	0.122	0.005	1.17166e-11
Gm10143	4.73598e-16	3.08261	0.707	0.237	1.38035e-11
Gm27038	7.19193e-16	5.40857	0.098	0.003	2.09616e-11
Shox2	7.19193e-16	1.76372	0.098	0.003	2.09616e-11
Ifi30	7.3045e-16	3.4489	0.537	0.131	2.12897e-11
Chaf1a	1.48248e-15	3.57964	0.39	0.067	4.32083e-11
Tcf19	1.85302e-15	3.41822	0.61	0.172	5.40081e-11
Slc25a10	1.99137e-15	2.1281	0.707	0.219	5.80406e-11
Gas2l3	2.35857e-15	6.10553	0.415	0.082	6.87429e-11
Blm	2.51676e-15	2.78617	0.317	0.044	7.33534e-11
Bora	3.33254e-15	3.14659	0.439	0.088	9.71301e-11
Ezh2	3.81056e-15	2.63444	0.537	0.127	1.11063e-10
Dscc1	4.85511e-15	3.27934	0.268	0.033	1.41507e-10
Hist1h3e	5.06143e-15	2.48005	0.146	0.009	1.4752e-10
Cenpi	5.54025e-15	5.40867	0.488	0.114	1.61476e-10
Prr11	5.83048e-15	5.68786	0.39	0.074	1.69935e-10
Cep128	6.01793e-15	4.0081	0.463	0.099	1.75399e-10
Ccne1	1.01424e-14	5.64438	0.22	0.022	2.9561e-10
Gm20667	1.08661e-14	8.15101	0.073	0.001	3.16703e-10
Gm10087	1.11887e-14	7.06586	0.073	0.001	3.26107e-10
Gm16212	1.11887e-14	6.1618	0.073	0.001	3.26107e-10
Gm15599	1.16473e-14	2.06067	0.366	0.061	3.39472e-10
Hist1h3b	1.18626e-14	4.60589	0.073	0.001	3.45747e-10
Gm16027	1.18626e-14	4.19446	0.073	0.001	3.45747e-10
Rrm1	1.27024e-14	2.78934	0.854	0.432	3.70225e-10
Cdc25b	1.5163e-14	2.54045	0.732	0.262	4.4194e-10
Pidd1	1.60781e-14	2.13045	0.366	0.062	4.68612e-10
Ticrr	1.85068e-14	4.40985	0.146	0.009	5.39398e-10
Thap8	2.11953e-14	2.96293	0.195	0.017	6.17757e-10
Traip	2.31724e-14	4.02783	0.293	0.041	6.75382e-10
Pask	2.4424e-14	5.33122	0.317	0.049	7.11862e-10
Reep4	2.78398e-14	2.04219	0.805	0.319	8.1142e-10
Ska2	2.93776e-14	2.33535	0.61	0.183	8.5624e-10
Cdc45	2.95913e-14	4.01427	0.39	0.075	8.62468e-10
Mybl2	3.40495e-14	5.84537	0.293	0.042	9.92408e-10
Kifc5b	3.7058e-14	6.08277	0.098	0.004	1.08009e-09
Efcab11	3.86696e-14	5.53919	0.171	0.013	1.12706e-09
Syce2	3.87189e-14	2.67512	0.366	0.064	1.1285e-09
Tmpo	4.65296e-14	2.5103	0.902	0.495	1.35615e-09
RP23-110C17.2	5.1461e-14	2.30428	0.951	0.684	1.49988e-09
Rad51	7.83658e-14	3.35442	0.634	0.212	2.28405e-09
Gsg2	8.44644e-14	4.14442	0.317	0.05	2.4618e-09
Scml2	9.00365e-14	4.5292	0.195	0.018	2.6242e-09
Hist1h4j	9.16736e-14	3.78918	0.122	0.006	2.67192e-09
Chek1	1.03789e-13	3.58483	0.195	0.018	3.02505e-09
Skp2	1.0743e-13	2.97401	0.39	0.076	3.13115e-09
RP24-230J14.4	1.13035e-13	2.01176	0.659	0.201	3.29453e-09
BC055324	1.1326e-13	2.87027	0.537	0.134	3.30108e-09
Ulbp1	1.57276e-13	3.34281	0.39	0.077	4.58396e-09
Mcm10	1.68198e-13	5.816	0.268	0.037	4.90229e-09
Dctpp1	1.77743e-13	2.18289	0.707	0.255	5.18049e-09
Cenpq	1.79957e-13	3.35246	0.634	0.234	5.24503e-09
Fkbp2	1.92889e-13	1.46341	0.927	0.443	5.62196e-09
Gm11788	1.97471e-13	2.26185	0.366	0.064	5.7555e-09
Cmc2	2.07181e-13	2.49539	0.561	0.162	6.0385e-09
Haus3	2.26777e-13	2.33078	0.537	0.141	6.60964e-09
BC052040	2.4374e-13	3.01567	0.317	0.051	7.10405e-09
Dnajc9	2.4412e-13	2.3405	0.756	0.304	7.11512e-09
Rnf26	3.32575e-13	1.91769	0.659	0.204	9.69324e-09
Rad51ap1	3.36786e-13	3.88099	0.463	0.117	9.81596e-09
Dynlt1f	4.29315e-13	1.55039	0.634	0.177	1.25128e-08
Hmgn2	4.78008e-13	2.04788	0.927	0.789	1.3932e-08
Cenpl	5.01229e-13	2.3518	0.488	0.123	1.46088e-08
Hn1	5.8534e-13	2.16112	0.951	0.596	1.70603e-08
Tuba1b	7.16836e-13	1.45303	1	0.965	2.08929e-08
Pole	7.63828e-13	3.48961	0.463	0.116	2.22625e-08
Gpsm2	8.4038e-13	3.56227	0.805	0.395	2.44937e-08
Exosc9	9.38599e-13	1.6882	0.902	0.475	2.73564e-08
Gm5539	1.07753e-12	4.82692	0.098	0.004	3.14058e-08
Ppp1r18os	1.09364e-12	1.9203	0.659	0.221	3.18753e-08
Primpol	1.22933e-12	1.95346	0.39	0.078	3.58301e-08
Usp1	1.40935e-12	2.18381	0.707	0.279	4.10769e-08
Tubb5	1.65731e-12	1.52742	1	0.999	4.83039e-08
Lig1	1.67896e-12	3.7337	0.585	0.208	4.8935e-08
Hist1h2bl	2.82293e-12	6.36666	0.073	0.002	8.22772e-08
Hist1h2bn	3.03574e-12	4.72292	0.073	0.002	8.84796e-08
Alg8	3.63739e-12	1.73947	0.512	0.143	1.06015e-07
Hist2h3b	3.7324e-12	3.68573	0.146	0.011	1.08784e-07
Hdgf	4.99305e-12	1.6255	0.976	0.6	1.45528e-07
Mtl5	5.25488e-12	3.35806	0.122	0.008	1.53159e-07
Nup37	5.30171e-12	1.77863	0.561	0.163	1.54524e-07
Anp32b	5.34648e-12	1.44911	1	0.718	1.55828e-07
Eri2	7.85064e-12	1.5132	0.366	0.073	2.28815e-07
Dck	8.19401e-12	2.07037	0.683	0.261	2.38823e-07
Mlf1	8.33764e-12	2.16107	0.415	0.096	2.43009e-07
Mnd1	9.30398e-12	3.05692	0.22	0.028	2.71174e-07
Ccdc184	1.01548e-11	2.93527	0.512	0.151	2.95972e-07
Smc4	1.27765e-11	2.08932	0.902	0.574	3.72385e-07
Emp3	1.33521e-11	1.91302	0.951	0.779	3.89161e-07
Gm26623	1.35106e-11	2.26569	0.488	0.136	3.93779e-07
Mb21d1	1.49987e-11	2.76324	0.293	0.049	4.37153e-07
Syngr4	1.56093e-11	5.2508	0.098	0.005	4.54948e-07
Tbc1d31	1.5977e-11	3.02157	0.341	0.067	4.65667e-07
Dek	1.86664e-11	1.81956	0.927	0.698	5.44051e-07
Nsl1	2.08922e-11	4.46286	0.293	0.052	6.08925e-07
Arhgap33	2.26194e-11	2.67029	0.341	0.07	6.59265e-07
Gm9531	2.42799e-11	7.20713	0.049	0.001	7.07663e-07
Nup205	2.47532e-11	2.29337	0.585	0.202	7.21457e-07
Gm5533	2.50891e-11	9.14891	0.049	0.001	7.31246e-07
Fbxo48	2.50891e-11	6.28292	0.049	0.001	7.31246e-07
Pkmyt1	2.51949e-11	3.19734	0.61	0.24	7.3433e-07
Cdt1	2.52209e-11	3.50205	0.366	0.081	7.35088e-07
Mogat1	2.59246e-11	5.74356	0.049	0.001	7.55598e-07
Gm25993	2.59246e-11	5.37447	0.049	0.001	7.55598e-07
Gm5832	2.59246e-11	4.9952	0.049	0.001	7.55598e-07
RP24-199E1.1	2.59246e-11	4.64034	0.049	0.001	7.55598e-07
Gm10184	3.17886e-11	3.86438	0.122	0.009	9.26512e-07
Gm12811	3.59063e-11	2.16444	0.244	0.035	1.04652e-06
Tyms	3.8078e-11	2.28749	0.854	0.482	1.10982e-06
Prim1	4.10009e-11	2.37997	0.537	0.172	1.19501e-06
Cdc23	4.2291e-11	1.77077	0.878	0.502	1.23261e-06
Mcm5	5.17305e-11	3.52759	0.61	0.246	1.50774e-06
Arl4c	5.41465e-11	2.77758	0.463	0.13	1.57815e-06
Dut	5.9259e-11	1.98693	0.732	0.312	1.72716e-06
Rad21	6.14851e-11	1.65929	0.902	0.502	1.79205e-06
Kctd18	8.15253e-11	1.37181	0.634	0.231	2.37614e-06
Suv39h2	8.50445e-11	3.36516	0.244	0.038	2.47871e-06
Acsm3	8.8345e-11	1.28253	0.244	0.037	2.5749e-06
Anp32e	9.1708e-11	1.9911	0.805	0.468	2.67292e-06
Nostrin	9.53072e-11	1.58596	0.61	0.195	2.77782e-06
Mutyh	9.60736e-11	2.8555	0.293	0.054	2.80016e-06
Nde1	9.68981e-11	1.71113	0.902	0.566	2.82419e-06
Lgals1	1.20791e-10	1.57046	1	0.749	3.52058e-06
Gm26625	1.24216e-10	2.03513	0.22	0.031	3.62041e-06
Kif18a	1.4263e-10	4.57369	0.341	0.075	4.15708e-06
Ahcy	1.5889e-10	2.18902	0.39	0.093	4.631e-06
Gm5702	1.60944e-10	4.5114	0.073	0.003	4.69086e-06
Zw10	1.9061e-10	1.70614	0.659	0.25	5.55551e-06
Nptxr	1.93797e-10	3.06065	0.463	0.139	5.6484e-06
Ckap4	2.17271e-10	1.77999	0.829	0.465	6.33258e-06
Mxd3	2.36421e-10	2.15255	0.927	0.775	6.89071e-06
Rfc4	2.49029e-10	2.73551	0.585	0.228	7.2582e-06
Gm15929	3.09564e-10	1.28424	0.244	0.039	9.02255e-06
Dynlt1a	3.17813e-10	2.3998	0.39	0.094	9.26297e-06
Nup155	3.49465e-10	1.07337	0.634	0.228	1.01855e-05
Cep85	3.59529e-10	1.44284	0.707	0.336	1.04788e-05
Ttf2	3.8516e-10	2.74712	0.415	0.112	1.12259e-05
Gm20628	3.92053e-10	3.16978	0.366	0.087	1.14268e-05
Fam166a	4.8087e-10	1.30824	1	0.838	1.40154e-05
Ran	6e-10	1.2339	1	0.883	1.74876e-05
Ripk3	6.31429e-10	1.57274	0.878	0.484	1.84036e-05
Hsp90aa1	6.4672e-10	1.28046	0.976	0.814	1.88493e-05
Gm10182	6.9245e-10	2.40495	0.195	0.026	2.01821e-05
Ccdc14	7.87468e-10	2.0285	0.244	0.04	2.29516e-05
Gm26737	8.12622e-10	1.85678	0.488	0.147	2.36847e-05
Gm28800	9.7506e-10	2.68342	0.098	0.006	2.84191e-05
Eri1	1.00413e-09	2.63165	0.537	0.204	2.92664e-05
Gm37979	1.06377e-09	3.95417	0.098	0.006	3.10047e-05
RP24-378G4.3	1.22732e-09	1.47636	0.951	0.748	3.57715e-05
Pgp	1.23987e-09	2.13293	0.829	0.434	3.61371e-05
Haus4	1.33032e-09	1.69272	0.659	0.289	3.87735e-05
Rbbp7	1.45985e-09	1.49004	0.976	0.818	4.25489e-05
Prdx4	1.93919e-09	1.49458	0.976	0.683	5.65195e-05
E2f7	1.97059e-09	2.35055	0.537	0.194	5.74348e-05
Psat1	1.97978e-09	2.69289	0.634	0.29	5.77026e-05
Dnmt1	2.09077e-09	2.38699	0.683	0.339	6.09375e-05
Pola1	2.17424e-09	2.37759	0.439	0.132	6.33705e-05
Cyp39a1	2.54018e-09	2.20936	0.415	0.119	7.40362e-05
Rbmx2	2.61744e-09	1.15177	0.512	0.161	7.62879e-05
Gm7858	2.66104e-09	5.9402	0.073	0.004	7.75586e-05
Ipo9	2.90918e-09	1.70499	0.805	0.423	8.47909e-05
Tbc1d4	3.02053e-09	2.0533	0.634	0.289	8.80365e-05
Dpcr1	3.12854e-09	3.9179	0.073	0.004	9.11845e-05
Kpna2	3.31535e-09	2.73902	0.707	0.37	9.66292e-05
Cpsf4	3.45118e-09	1.10611	0.634	0.24	0.000100588
RP24-194F23.3	3.5134e-09	1.08128	0.268	0.05	0.000102402
Tubb4b	4.15081e-09	1.17629	1	0.959	0.00012098
E2f8	4.20251e-09	5.4265	0.293	0.066	0.000122486
Poln	4.59294e-09	1.7626	0.293	0.06	0.000133866
Mcoln2	4.68252e-09	11.7868	0.024	0	0.000136477
Ssmem1	4.68252e-09	11.3973	0.024	0	0.000136477
L3mbtl1	4.68252e-09	11.3792	0.024	0	0.000136477
Tssk1	4.68252e-09	11.2528	0.024	0	0.000136477
Kcnd2	4.68252e-09	11.1428	0.024	0	0.000136477
Mir6360	4.68252e-09	10.9598	0.024	0	0.000136477
Gm24589	4.68252e-09	8.81935	0.024	0	0.000136477
Mir466f-1	4.68252e-09	8.79446	0.024	0	0.000136477
Atp5l-ps2	4.68252e-09	8.33567	0.024	0	0.000136477
Gm16194	4.68252e-09	8.22358	0.024	0	0.000136477
1700007K09Rik	4.68252e-09	8.13777	0.024	0	0.000136477
Gm12656	4.68252e-09	7.90201	0.024	0	0.000136477
Mir466m	4.68252e-09	7.90201	0.024	0	0.000136477
Gm28465	4.68252e-09	7.90201	0.024	0	0.000136477
Mir7063	4.68252e-09	7.81103	0.024	0	0.000136477
Rprm	4.68252e-09	7.77624	0.024	0	0.000136477
Mybphl	4.68252e-09	7.75863	0.024	0	0.000136477
Atp1a4	4.68252e-09	7.66383	0.024	0	0.000136477
Gm9166	4.68252e-09	7.63163	0.024	0	0.000136477
Gm11914	4.68252e-09	7.63163	0.024	0	0.000136477
RP24-196M24.3	4.68252e-09	7.63163	0.024	0	0.000136477
Gm15390	4.68252e-09	7.59554	0.024	0	0.000136477
Mir6918	4.68252e-09	7.5502	0.024	0	0.000136477
Gm27353	4.68252e-09	7.49926	0.024	0	0.000136477
Gm5593	4.68252e-09	7.48512	0.024	0	0.000136477
Gm15554	4.68252e-09	7.38995	0.024	0	0.000136477
Gm15899	4.68252e-09	7.24673	0.024	0	0.000136477
RP23-81K19.4	4.68252e-09	7.24673	0.024	0	0.000136477
Gm13036	4.68252e-09	7.16502	0.024	0	0.000136477
Ripply1	4.68252e-09	7.08985	0.024	0	0.000136477
Gm13504	4.68252e-09	7.08985	0.024	0	0.000136477
Nipsnap3a	4.68252e-09	7.01646	0.024	0	0.000136477
Lama1	4.68252e-09	7.01646	0.024	0	0.000136477
Gm9577	4.68252e-09	6.97112	0.024	0	0.000136477
Hist3h2bb-ps	4.68252e-09	6.96083	0.024	0	0.000136477
Mgam	4.68252e-09	6.94815	0.024	0	0.000136477
Gm13176	4.68252e-09	6.88069	0.024	0	0.000136477
Gm23897	4.68252e-09	6.67804	0.024	0	0.000136477
AC160122.1	4.68252e-09	6.67804	0.024	0	0.000136477
Krt33a	4.68252e-09	6.66078	0.024	0	0.000136477
Gm12891	4.68252e-09	6.66078	0.024	0	0.000136477
Gm5099	4.68252e-09	6.66078	0.024	0	0.000136477
Saa3	4.68252e-09	6.65109	0.024	0	0.000136477
Gm5393	4.68252e-09	6.65109	0.024	0	0.000136477
Gm14125	4.68252e-09	6.65109	0.024	0	0.000136477
Gm5648	4.68252e-09	6.33861	0.024	0	0.000136477
Gm15970	4.68252e-09	6.33861	0.024	0	0.000136477
Gm28209	4.68252e-09	6.33861	0.024	0	0.000136477
Tubg1	4.89432e-09	1.69551	0.707	0.344	0.00014265
Dtymk	4.92334e-09	1.23512	0.829	0.453	0.000143496
Hist1h4m	5.06365e-09	3.43592	0.098	0.007	0.000147585
Mcph1	5.5432e-09	2.03809	0.415	0.121	0.000161562
Cep192	5.629e-09	1.52159	0.512	0.17	0.000164063
Hist1h4a	5.63666e-09	2.95307	0.098	0.007	0.000164286
Cdca4	5.66761e-09	1.96231	0.732	0.382	0.000165188
Spata24	5.96861e-09	1.36876	0.341	0.082	0.000173961
Gm14537	6.10733e-09	3.15433	0.098	0.007	0.000178004
Hist1h2al	6.22068e-09	3.01974	0.122	0.011	0.000181308
Uchl5	6.93316e-09	1.23728	0.78	0.395	0.000202074
Hn1l	7.48406e-09	1.93252	0.854	0.56	0.00021813
Dazap1	7.51477e-09	2.02916	0.756	0.361	0.000219026
Hells	8.00706e-09	3.93561	0.317	0.077	0.000233374
Slc24a5	8.01442e-09	1.71951	0.659	0.278	0.000233588
Cdkn2aipnl	8.19991e-09	1.14766	0.854	0.48	0.000238995
Dnah14.2	9.39955e-09	1.27448	0.927	0.637	0.000273959
Odf2	9.44726e-09	1.63265	0.78	0.402	0.00027535
Mcm7	1.05152e-08	2.54324	0.707	0.386	0.000306477
2700029M09Rik	1.05362e-08	1.56028	0.683	0.319	0.000307088
Nans	1.0651e-08	1.01802	0.878	0.495	0.000310434
Psip1	1.08979e-08	1.63474	0.683	0.288	0.000317631
Gm12522	1.17167e-08	8.22573	0.049	0.001	0.000341495
Gm25360	1.17322e-08	2.38494	0.22	0.037	0.000341948
Mir6990	1.20066e-08	6.30323	0.049	0.001	0.000349943
G2e3	1.2239e-08	1.96847	0.537	0.199	0.000356719
Cfap52	1.23034e-08	3.50143	0.049	0.001	0.000358594
Rps16-ps2	1.26073e-08	4.76965	0.049	0.001	0.000367453
Derl3	1.26073e-08	4.11111	0.049	0.001	0.000367453
Nup35	1.28653e-08	1.10133	0.561	0.199	0.000374973
Cdk5rap2	1.44475e-08	2.19658	0.415	0.128	0.000421088
Gm16575	1.48085e-08	2.02274	0.537	0.202	0.000431607
Fam57a	1.62831e-08	1.22006	0.976	0.62	0.000474588
Mdm1	1.67342e-08	2.43715	0.293	0.066	0.000487736
Rad18	1.72326e-08	2.26298	0.463	0.154	0.000502262
Gm23865	1.78003e-08	1.77079	0.439	0.128	0.000518807
Gm16121	2.14185e-08	1.8535	0.366	0.094	0.000624262
Krt23	2.29664e-08	2.3154	0.366	0.101	0.00066938
Fanci	2.45613e-08	1.4345	0.561	0.199	0.000715864
Mphosph9	2.47313e-08	1.92295	0.39	0.113	0.000720819
Grk6	2.58136e-08	1.94362	0.659	0.299	0.000752362
Pms2	2.63511e-08	1.267	0.512	0.183	0.00076803
Cotl1	2.7016e-08	1.61518	0.805	0.478	0.000787409
Trpm4	2.71527e-08	1.12401	0.488	0.17	0.000791393
Lbr	2.83094e-08	1.34495	0.927	0.848	0.000825105
AC124745.1	2.87541e-08	5.31251	0.073	0.004	0.000838067
Rad51b	2.96831e-08	5.61686	0.073	0.004	0.000865144
Poc1a	3.15321e-08	2.41379	0.366	0.107	0.000919036
Haus8	3.18552e-08	3.06723	0.61	0.312	0.000928452
Vars2	3.27209e-08	1.51771	0.39	0.111	0.000953683
Tfdp1	3.61473e-08	1.68828	0.683	0.331	0.00105355
Sacs	3.66416e-08	1.33504	0.463	0.15	0.00106796
Lsm3	3.67826e-08	1.08096	0.756	0.366	0.00107207
Uevld	3.82183e-08	2.12608	0.488	0.173	0.00111391
Pomt1	3.98641e-08	2.4208	0.634	0.298	0.00116188
Snrnp25	4.03327e-08	1.05231	0.61	0.25	0.00117554
Calm3	4.17652e-08	1.51274	0.927	0.6	0.00121729
Nucks1	4.23752e-08	1.55258	0.756	0.425	0.00123507
Sfmbt1	4.32919e-08	1.25343	0.463	0.151	0.00126178
Sun2	4.43047e-08	2.03862	0.902	0.689	0.0012913
Cby1	4.45621e-08	1.13086	0.683	0.314	0.00129881
Sec11c	4.56578e-08	1.42462	0.805	0.429	0.00133074
Gm22801	4.77201e-08	2.20257	0.341	0.091	0.00139085
Lmna	4.93226e-08	1.1241	1	0.994	0.00143756
Hmgn5	5.34704e-08	1.33075	0.707	0.354	0.00155845
Pilra	5.42416e-08	3.90399	0.146	0.019	0.00158092
Myef2	5.53943e-08	1.85384	0.707	0.373	0.00161452
Nsg1	5.91808e-08	1.50056	0.951	0.864	0.00172488
Ddx39	5.99026e-08	1.24654	0.951	0.767	0.00174592
Hist1h4c	6.14433e-08	2.10247	0.195	0.033	0.00179083
Gjc1	6.14848e-08	1.33508	0.537	0.207	0.00179203
Gm15676	6.17402e-08	4.7853	0.122	0.013	0.00179948
Pold1	6.62866e-08	1.27578	0.561	0.237	0.00193199
Kctd9	6.75233e-08	1.58379	0.512	0.195	0.00196803
Sap30	6.99359e-08	1.77457	0.439	0.144	0.00203835
Wdhd1	7.38453e-08	2.77894	0.488	0.188	0.00215229
Prim2	7.58885e-08	2.13357	0.512	0.207	0.00221185
Gm18182	8.49631e-08	2.3139	0.146	0.019	0.00247633
Zgrf1	8.69201e-08	3.03356	0.22	0.043	0.00253337
Brip1os	8.83549e-08	1.44588	0.805	0.508	0.00257519
Timp1	8.97021e-08	1.36055	0.659	0.286	0.00261446
2610203C22Rik	9.20174e-08	1.40239	0.39	0.111	0.00268194
Gm16436	9.37942e-08	2.78291	0.122	0.013	0.00273373
Fhl2	1.05499e-07	2.82852	0.146	0.02	0.00307488
Nap1l1	1.08805e-07	1.27364	0.854	0.596	0.00317122
Wbscr27	1.20479e-07	1.75757	0.488	0.185	0.00351149
Ncam1	1.22383e-07	1.38841	0.537	0.221	0.00356696
Gm14820	1.24047e-07	1.63292	0.317	0.081	0.00361546
Tex9	1.25961e-07	1.18977	0.293	0.071	0.00367126
Zranb3	1.28686e-07	3.43439	0.244	0.054	0.00375068
Fzr1	1.31934e-07	1.24351	0.829	0.533	0.00384535
Gnai3	1.3499e-07	1.11307	0.951	0.762	0.0039344
Tmem194b	1.44734e-07	1.78279	0.293	0.073	0.00421842
RP23-332O18.2	1.44779e-07	2.38862	0.244	0.053	0.00421974
Bricd5	1.47411e-07	1.25588	0.415	0.129	0.00429644
Gm38287	1.51858e-07	1.06864	0.756	0.351	0.00442606
H2afv	1.58433e-07	1.16844	0.976	0.79	0.00461768
Nup62	1.60803e-07	1.77707	0.707	0.397	0.00468675
Siva1	1.6322e-07	1.70187	0.61	0.285	0.00475722
Bpifb1	1.66585e-07	1.77282	0.39	0.119	0.00485529
Enkd1	1.67367e-07	1.75617	0.341	0.093	0.00487807
Akip1	1.70103e-07	1.22555	0.561	0.219	0.00495781
Rny3	1.71824e-07	2.53482	0.146	0.02	0.00500798
Asrgl1	1.72419e-07	1.55473	0.415	0.138	0.00502531
4933404O12Rik	1.72562e-07	3.04562	0.317	0.089	0.00502949
Myo5a	1.75497e-07	1.60363	0.439	0.155	0.00511503
Gins3	1.81375e-07	2.78448	0.268	0.065	0.00528636
Ckap5	1.84028e-07	2.1448	0.634	0.346	0.00536367
Paqr4	1.87045e-07	1.10851	0.829	0.527	0.00545161
1700066M21Rik	1.88126e-07	1.63317	0.317	0.084	0.00548312
Tube1	1.91128e-07	2.61165	0.171	0.028	0.0055706
Pgk1	1.91884e-07	1.09575	0.976	0.674	0.00559266
Cdc6	1.92944e-07	4.04635	0.146	0.021	0.00562354
Cda	1.9557e-07	1.18089	0.829	0.503	0.0057001
Rbl1	1.98173e-07	1.51332	0.488	0.175	0.00577595
Rpa2	1.98335e-07	1.69585	0.585	0.282	0.00578067
Rfc5	2.01843e-07	1.8259	0.732	0.433	0.00588292
Nrarp	2.04795e-07	1.17787	0.78	0.382	0.00596897
S100a4	2.23565e-07	1.09868	0.902	0.735	0.00651604
Gnb1l	2.24496e-07	2.26325	0.293	0.075	0.00654316
Ctc1	2.37366e-07	2.0986	0.561	0.247	0.00691828
Tipin	2.42376e-07	1.21222	0.732	0.394	0.00706428
Slc25a24	2.46285e-07	1.00367	0.854	0.518	0.00717821
Atad2	2.46709e-07	2.36817	0.463	0.176	0.00719057
RP24-267O6.1	2.57632e-07	2.46692	0.195	0.036	0.00750894
AL590614.2	2.5977e-07	2.07411	0.098	0.009	0.00757125
Whsc1	2.73089e-07	1.85763	0.585	0.283	0.00795946
Mcm2	2.79445e-07	2.55382	0.537	0.255	0.00814471
Wee1	2.86785e-07	2.08693	0.366	0.113	0.00835862
Xrcc1	2.97068e-07	1.23316	0.707	0.367	0.00865835
Gm14150	3.22563e-07	1.59433	0.439	0.146	0.00940141
Rnaseh2b	3.2835e-07	1.166	0.683	0.355	0.0095701
Cep57l1	3.35838e-07	2.95356	0.439	0.174	0.00978833
Hjurp	3.45738e-07	1.55765	0.829	0.678	0.0100769
Tdp1	3.65297e-07	2.08374	0.366	0.119	0.010647
Pold2	3.67365e-07	1.64896	0.707	0.393	0.0107072
Tbl2	3.79511e-07	1.57101	0.585	0.265	0.0110612
Sephs1	4.2758e-07	1.17552	0.707	0.373	0.0124622
Mest	4.34014e-07	1.06872	0.927	0.684	0.0126498
Igsf8	4.52567e-07	1.09692	0.585	0.266	0.0131905
Gm26916	4.6566e-07	1.39536	0.488	0.185	0.0135721
Gm38188	4.88623e-07	7.22127	0.049	0.002	0.0142414
RP23-265P8.4	4.9821e-07	4.91753	0.049	0.002	0.0145208
Hist1h3d	5.07979e-07	5.32168	0.049	0.002	0.0148056
Trpv6	5.17932e-07	4.61346	0.049	0.002	0.0150957
Rpa1	5.18238e-07	1.76858	0.805	0.532	0.0151046
Dnah8	5.20128e-07	3.44647	0.195	0.038	0.0151597
AL592149.1	5.28074e-07	4.00126	0.049	0.002	0.0153912
Batf3	5.28074e-07	2.54095	0.049	0.002	0.0153912
Gm12181	5.48934e-07	4.0913	0.049	0.002	0.0159992
Mthfd2	5.84385e-07	2.65228	0.293	0.079	0.0170325
Hist1h1e	6.03756e-07	1.94382	0.512	0.222	0.0175971
Ints2	6.13172e-07	1.61508	0.488	0.192	0.0178715
Kcnab2	6.34833e-07	5.36254	0.146	0.023	0.0185028
Mir301	6.88006e-07	2.18861	0.098	0.01	0.0200526
Raet1d	6.94625e-07	1.87855	0.293	0.077	0.0202455
Cenpc1	7.10728e-07	2.28033	0.61	0.356	0.0207149
Etaa1	7.16687e-07	1.30105	0.293	0.077	0.0208886
Cbfb	7.24528e-07	1.61927	0.61	0.298	0.0211171
Twsg1	7.31587e-07	1.46864	0.829	0.602	0.0213228
Tex30	7.36103e-07	2.48839	0.415	0.152	0.0214544
Rfc3	7.53079e-07	1.53392	0.537	0.24	0.0219493
Ngfrap1	8.08302e-07	1.7193	0.659	0.384	0.0235588
Xpo1	8.6553e-07	1.51435	0.707	0.416	0.0252267
1810055G02Rik	9.27304e-07	1.25872	0.512	0.209	0.0270272
Nid2	9.28572e-07	1.1362	0.878	0.758	0.0270642
Mtch2	9.44017e-07	1.07492	0.951	0.756	0.0275143
Slfn9	9.65386e-07	3.77598	0.488	0.226	0.0281372
Aipl1	9.70034e-07	3.15536	0.171	0.031	0.0282726
Naa40	1.00304e-06	1.73717	0.585	0.287	0.0292347
2610524H06Rik	1.0062e-06	1.10754	0.634	0.299	0.0293268
Nup93	1.02185e-06	1.33529	0.659	0.354	0.0297828
Larp7	1.07969e-06	1.10611	0.683	0.347	0.0314687
Arl6ip6	1.08355e-06	1.03455	0.634	0.3	0.031581
RP23-391P21.2	1.09695e-06	1.81547	0.512	0.224	0.0319717
Ncapd3	1.1073e-06	2.72766	0.488	0.216	0.0322733
Miip	1.12405e-06	1.77305	0.634	0.348	0.0327616
Cdkn2c	1.15052e-06	2.01294	0.561	0.27	0.033533
Wdr90	1.16074e-06	2.79559	0.244	0.06	0.0338308
Ppil1	1.16929e-06	1.36695	0.634	0.331	0.03408
Setd8	1.21886e-06	1.03192	0.439	0.15	0.0355248
Npnt	1.24021e-06	1.10057	0.902	0.645	0.0361472
Col18a1	1.27521e-06	1.02852	1	0.938	0.0371673
Cchcr1	1.30271e-06	2.60771	0.415	0.147	0.0379687
Eme1	1.32528e-06	1.48294	0.829	0.474	0.0386265
Baz1b	1.32844e-06	1.53117	0.829	0.576	0.0387188
Gsg1	1.3424e-06	3.43322	0.146	0.023	0.0391255
Hist1h4d	1.40653e-06	2.48261	0.537	0.268	0.0409947
Rmi2	1.45089e-06	3.97867	0.39	0.134	0.0422876
Adam12	1.48479e-06	1.59099	0.512	0.223	0.0432756
Ugdh	1.58637e-06	1.52355	0.683	0.413	0.0462364
Larp1b	1.58994e-06	1.00082	0.39	0.127	0.0463405
Icmt	1.67298e-06	1.36201	0.732	0.419	0.0487606
Slc29a1	1.67413e-06	1.02779	1	0.913	0.0487943
Rangap1	1.6805e-06	1.4467	0.707	0.397	0.0489799
Gm12256	1.71906e-06	1.07358	0.195	0.039	0.0501038
Dbr1	1.76435e-06	1.30126	0.439	0.164	0.0514236
Cetn4	1.77751e-06	3.01667	0.268	0.07	0.0518072
Dtl	1.84798e-06	4.5035	0.39	0.145	0.0538614
Galnt12	1.86593e-06	2.81672	0.171	0.032	0.0543845
Tarsl2	1.86972e-06	1.0373	0.415	0.149	0.0544949
2610020C07Rik	1.95126e-06	1.82995	0.488	0.19	0.0568714
Cenpj	1.97945e-06	2.37979	0.268	0.072	0.057693
Tfb1m	2.10545e-06	1.75044	0.22	0.049	0.0613654
Lsm4	2.13061e-06	1.0869	0.878	0.603	0.0620989
Col6a3	2.13382e-06	1.20051	0.829	0.494	0.0621923
Hist1h3a	2.22093e-06	3.26757	0.122	0.017	0.0647312
Icosl	2.28328e-06	1.69476	0.244	0.06	0.0665485
Bckdk	2.28471e-06	1.08282	0.902	0.614	0.0665902
Mis12	2.57511e-06	1.60772	0.561	0.275	0.0750541
Idh2	2.57683e-06	1.21017	0.902	0.678	0.0751044
Hnrnpab	2.58569e-06	1.16501	0.902	0.774	0.0753626
Gins1	2.65519e-06	4.13365	0.415	0.155	0.0773883
RP23-326D6.5	2.83572e-06	1.02866	0.829	0.673	0.0826498
Rcc1	3.1768e-06	2.00274	0.683	0.424	0.092591
Mcm4	3.27252e-06	1.92262	0.561	0.296	0.0953808
Cklf	3.36676e-06	2.38239	0.366	0.121	0.0981275
Gm15389	3.41625e-06	3.21077	0.073	0.006	0.09957
9330154J02Rik	3.42488e-06	2.97495	0.122	0.018	0.0998215
Impa2	3.50894e-06	1.95149	0.317	0.099	0.102272
Cdkn2d	3.57791e-06	2.11878	0.561	0.288	0.104282
Edem1	3.61316e-06	1.67897	0.634	0.326	0.105309
Jak2	3.75735e-06	1.11115	0.756	0.419	0.109512
Urb2	3.82475e-06	1.85345	0.293	0.087	0.111476
Nsmce1	3.88099e-06	1.0038	0.805	0.554	0.113115
Rab35	3.96143e-06	1.5718	0.634	0.3	0.11546
Gnai1	3.97784e-06	1.02763	0.341	0.112	0.115938
Stt3b	4.0598e-06	1.01099	0.854	0.691	0.118327
Pfdn1	4.17326e-06	1.07372	0.829	0.597	0.121634
Cntln	4.17622e-06	1.37475	0.634	0.344	0.12172
Naa50	4.45489e-06	1.13053	0.707	0.406	0.129842
Zfp948	4.50197e-06	1.47732	0.488	0.216	0.131214
Nutf2	4.61738e-06	1.7144	0.878	0.527	0.134578
Cdca7l	4.77282e-06	1.63919	0.317	0.099	0.139109
4930579G24Rik	4.87987e-06	2.42898	0.268	0.08	0.142229
Mrpl57	5.40888e-06	1.05414	0.78	0.49	0.157647
Olfml2a	5.45044e-06	1.0172	0.976	0.91	0.158859
Cbx3	5.56907e-06	1.01291	0.878	0.741	0.162316
Timm50	5.59451e-06	1.42892	0.78	0.517	0.163058
Entpd5	5.62095e-06	1.21402	0.415	0.155	0.163828
RP24-347B12.1	5.6264e-06	3.94537	0.098	0.012	0.163987
Eed	5.63004e-06	1.07181	0.61	0.29	0.164093
Polh	5.65644e-06	1.5728	0.317	0.101	0.164863
Orc6	5.98556e-06	1.28252	0.61	0.329	0.174455
Gm16576	6.10257e-06	2.30746	0.122	0.018	0.177866
Obox8	6.15985e-06	6.72732	0.049	0.003	0.179535
RP24-499N22.1	6.15985e-06	3.86447	0.049	0.003	0.179535
Gm15346	6.25965e-06	4.86511	0.049	0.003	0.182444
Cers3	6.25965e-06	4.62325	0.049	0.003	0.182444
RP23-430G6.3	6.36099e-06	1.14061	0.049	0.003	0.185397
Arl6ip1	6.46336e-06	1.53524	0.976	0.801	0.188381
Gm12501	6.4639e-06	3.65016	0.049	0.003	0.188397
RP23-89M15.15	6.4639e-06	3.65016	0.049	0.003	0.188397
Rprml	6.4639e-06	3.54343	0.049	0.003	0.188397
Tmc4	6.49874e-06	1.42811	0.244	0.067	0.189412
Gm10357	6.5684e-06	3.63813	0.049	0.003	0.191443
Rab39	6.5684e-06	1.07198	0.049	0.003	0.191443
Alyref	6.61252e-06	1.48036	0.561	0.28	0.192728
Metrn	6.63111e-06	2.18834	0.146	0.026	0.19327
Vrk2	6.6791e-06	1.30977	0.463	0.201	0.194669
D630036G22Rik	6.68192e-06	1.8929	0.244	0.064	0.194751
Atad5	7.02982e-06	1.48888	0.22	0.055	0.204891
Sdhaf3	7.30312e-06	1.62588	0.341	0.114	0.212857
Mad1l1	7.46178e-06	1.62957	0.61	0.333	0.217481
Supt20	7.48599e-06	1.1747	0.927	0.603	0.218187
Zfp934	7.8603e-06	2.7195	0.171	0.035	0.229096
Ofd1	8.56157e-06	1.17683	0.439	0.182	0.249536
Fanca	8.5724e-06	2.28534	0.39	0.151	0.249851
Ppp1cc	8.6521e-06	1.17099	0.878	0.561	0.252174
Anp32b-ps1	8.70002e-06	4.03358	0.073	0.007	0.253571
Gm37416	8.77825e-06	1.26525	0.317	0.098	0.255851
Mms22l	9.96221e-06	1.1263	0.244	0.066	0.290359
Dsn1	1.00687e-05	2.28903	0.317	0.11	0.293462
Paxip1	1.00947e-05	1.48552	0.659	0.404	0.294221
Gm37676	1.01374e-05	1.73028	0.22	0.055	0.295464
Ppp2r5d	1.03061e-05	1.17733	0.854	0.698	0.30038
Gm7125	1.04428e-05	2.68256	0.073	0.007	0.304367
Cmss1	1.07337e-05	1.59816	0.39	0.154	0.312844
Vrk1	1.07381e-05	1.50879	0.537	0.256	0.312971
Apol7a	1.08989e-05	2.28162	0.073	0.007	0.317659
Ep400	1.13158e-05	1.01566	0.878	0.619	0.32981
Phf6	1.1473e-05	1.74954	0.561	0.272	0.334391
H1f0	1.15663e-05	1.23487	0.976	0.935	0.337112
Chac2	1.1677e-05	1.9499	0.317	0.105	0.340338
Brd9	1.23037e-05	1.13331	0.829	0.579	0.358604
Msl3	1.34128e-05	1.68712	0.585	0.324	0.390931
Gm29247	1.35212e-05	1.16139	0.561	0.241	0.394088
Scaf8	1.37813e-05	1.51795	0.707	0.376	0.401668
Haus7	1.39113e-05	1.43109	0.512	0.251	0.405459
Oxct1	1.41844e-05	1.36907	0.61	0.361	0.413418
Snord16a	1.4709e-05	1.87866	0.171	0.036	0.428709
3010026O09Rik	1.52982e-05	2.28367	0.341	0.126	0.44588
Gk	1.55475e-05	2.07221	0.268	0.081	0.453148
Gm20483	1.58677e-05	1.67004	0.171	0.036	0.462481
Tmem81	1.65055e-05	2.85809	0.171	0.037	0.481069
Zfp808	1.68207e-05	1.81928	0.366	0.141	0.490255
Gm24507	1.68373e-05	1.50936	0.122	0.02	0.490739
Cst6	1.75762e-05	2.16412	0.463	0.212	0.512277
Hsd17b12	1.76217e-05	1.03181	0.805	0.549	0.513601
Gm11149	1.76662e-05	1.0373	0.244	0.065	0.514899
Zfp367	1.78387e-05	2.03578	0.415	0.186	0.519927
Gm12715	1.82372e-05	1.4476	0.415	0.167	0.531541
Strbp	1.93304e-05	1.27415	0.61	0.321	0.563405
Donson	1.95077e-05	1.56653	0.561	0.31	0.56857
Gm17080	1.96315e-05	1.07668	0.854	0.685	0.572178
Siah1b	1.98378e-05	1.66342	0.268	0.083	0.578191
Fsbp	2.00815e-05	2.41735	0.122	0.021	0.585295
Nup160	2.16703e-05	1.45796	0.512	0.251	0.631603
Rnf207	2.17944e-05	1.02802	0.463	0.194	0.63522
Slbp	2.20949e-05	1.77089	0.683	0.467	0.643978
Cd276	2.34529e-05	1.13368	0.659	0.331	0.683559
Fads1	2.35908e-05	1.15518	0.61	0.307	0.687578
Ccdc180	2.38723e-05	3.12086	0.146	0.029	0.695782
Ints1	2.43055e-05	2.08076	0.512	0.265	0.708408
Zik1	2.43635e-05	1.24335	0.195	0.048	0.710098
Ilf3	2.45523e-05	1.01002	0.756	0.526	0.715601
Gm22396	2.45704e-05	1.87158	0.098	0.013	0.716128
Rfc2	2.50349e-05	1.31276	0.78	0.538	0.729668
Wdr76	2.54049e-05	1.17098	0.293	0.093	0.74045
Faap24	2.55885e-05	1.89262	0.341	0.131	0.745803
Hist2h4	2.56648e-05	1.00475	0.171	0.038	0.748026
Tubgcp3	2.56719e-05	1.09443	0.683	0.399	0.748234
Hsd17b14	2.56826e-05	2.91462	0.073	0.008	0.748544
mmu-mir-1843a	2.56826e-05	2.2945	0.073	0.008	0.748544
R3hdm1	2.58745e-05	1.11577	0.878	0.61	0.754138
Gm12195	2.61951e-05	1.66154	0.073	0.008	0.763483
Rad54l	2.68877e-05	1.10384	0.707	0.414	0.783669
Mthfd1l	2.78582e-05	2.11793	0.39	0.167	0.811955
Gm27972	2.83442e-05	1.17444	0.073	0.008	0.826121
Gm38022	2.85678e-05	2.18395	0.122	0.021	0.832637
Klhl20	2.92872e-05	1.20268	0.634	0.334	0.853605
Cep112	2.95285e-05	1.53179	0.293	0.099	0.860636
Mesdc1	2.98862e-05	1.40986	0.707	0.446	0.871063
Ddx11	3.02894e-05	1.36113	0.317	0.111	0.882816
Rfwd3	3.05409e-05	1.30103	0.488	0.241	0.890146
Srd5a1	3.09453e-05	1.7803	0.244	0.07	0.901931
E2f1	3.17642e-05	1.73378	0.268	0.085	0.925799
Tmem194	3.2024e-05	2.27476	0.317	0.117	0.933372
Hnrnpa0	3.27122e-05	1.28475	0.732	0.414	0.95343
Arhgap21	3.40946e-05	1.13663	0.488	0.229	0.993723
