# Supplementary material
Source: Research Square preprint supplement (doi:10.21203/rs.3.rs-5333191/v1)
Supplement: Supplementary file 3 [file b1ddc6611af4dff50ff0ca21.xlsx]

## Sheet: DEG_36hpf
36 hpf	p_val	avg_log2FC	pct.1	pct.2	p_val_adj	cluster	gene
lyve1b	1.23734e-129	1.86781	1	1	3.12662e-125	0	lyve1b
lgmn	4.35338e-102	2.25455	1	1	1.10006e-97	0	lgmn
mrc1a	5.80234e-90	1.70454	1	0.999	1.46619e-85	0	mrc1a
stab2	1.16134e-77	2.0934	1	0.995	2.93459e-73	0	stab2
dab2	4.48296e-77	1.54624	1	1	1.1328e-72	0	dab2
rab11bb	1.6702e-75	1.15752	1	0.998	4.22042e-71	0	rab11bb
selenop	7.71776e-71	1.76242	0.995	0.984	1.9502e-66	0	selenop
si:dkey-28n18.9	3.31704e-68	1.28216	1	0.992	8.38184e-64	0	si:dkey-28n18.9
glula	8.43896e-68	2.55424	0.998	0.996	2.13244e-63	0	glula
snx1a	2.9516e-66	1.29681	1	1	7.4584e-62	0	snx1a
carhsp1	6.07339e-57	1.18802	0.991	0.983	1.53469e-52	0	carhsp1
zfp36l1a	6.4115e-57	1.20263	1	1	1.62012e-52	0	zfp36l1a
flt4	1.1045e-53	1.09909	0.998	0.998	2.79095e-49	0	flt4
prcp	1.77968e-50	1.10477	1	1	4.49708e-46	0	prcp
mafba	1.89809e-49	1.6128	0.979	0.927	4.79629e-45	0	mafba
aplnra	1.2192e-46	1.08422	1	0.999	3.08079e-42	0	aplnra
snap23.1	4.85653e-46	1.25578	0.989	0.98	1.2272e-41	0	snap23.1
cd81a	2.52697e-44	0.586329	1	1	6.3854e-40	0	cd81a
ctsba	2.28916e-41	1.41193	0.995	0.977	5.78449e-37	0	ctsba
nrp2b	1.23348e-40	0.941993	0.998	0.997	3.11688e-36	0	nrp2b
lamp2	3.12107e-40	1.05146	0.998	0.996	7.88662e-36	0	lamp2
cxcl12a	4.3802e-40	2.19735	0.911	0.808	1.10683e-35	0	cxcl12a
sele	4.39569e-40	1.40588	0.998	0.994	1.11075e-35	0	sele
atoh8	7.50181e-39	1.70043	0.946	0.876	1.89563e-34	0	atoh8
zgc:110239	3.39416e-38	1.3784	0.993	0.961	8.57671e-34	0	zgc:110239
hexb	4.57003e-38	1.75368	0.991	0.981	1.1548e-33	0	hexb
mafbb	4.84137e-37	1.15352	0.979	0.964	1.22337e-32	0	mafbb
plvapb	1.13644e-36	0.867806	1	1	2.87166e-32	0	plvapb
nr2f1a	2.47637e-36	1.01117	0.993	0.99	6.25754e-32	0	nr2f1a
gpr182	4.12717e-33	0.688262	1	1	1.04289e-28	0	gpr182
ctsd	4.39559e-33	0.917506	1	1	1.11072e-28	0	ctsd
nr2f2	5.96812e-33	0.954093	0.986	0.971	1.50808e-28	0	nr2f2
zgc:65851	8.62091e-33	2.13983	0.981	0.994	2.17842e-28	0	zgc:65851
slco2b1	3.41889e-32	2.13347	0.895	0.798	8.6392e-28	0	slco2b1
nrp2a	4.9126e-32	1.33622	0.933	0.884	1.24136e-27	0	nrp2a
cpn1	1.57491e-31	0.584857	0.998	0.993	3.97965e-27	0	cpn1
ehd4	1.21177e-30	0.857341	0.998	0.991	3.06202e-26	0	ehd4
ogna	2.17467e-30	2.73846	0.783	0.646	5.49517e-26	0	ogna
rab11fip1b	3.10221e-30	1.66385	0.802	0.658	7.83899e-26	0	rab11fip1b
strbp	6.74267e-30	1.76538	0.879	0.786	1.70381e-25	0	strbp
flrt2	1.00444e-29	0.990798	0.968	0.916	2.53812e-25	0	flrt2
kirrel3l	3.5656e-29	0.902728	0.998	0.998	9.00991e-25	0	kirrel3l
zgc:158343	3.60473e-29	1.11438	0.981	0.944	9.1088e-25	0	zgc:158343
gnpda1	2.24163e-28	1.87939	0.809	0.725	5.66437e-24	0	gnpda1
stab1	2.18005e-27	0.987473	0.998	0.999	5.50877e-23	0	stab1
atp1b1a	3.48191e-27	0.97582	0.996	0.992	8.79844e-23	0	atp1b1a
il13ra2	5.11353e-27	3.05494	0.86	0.799	1.29214e-22	0	il13ra2
ctsla	4.81925e-26	0.803519	1	1	1.21778e-21	0	ctsla
gabarapb	5.44216e-26	0.730409	0.998	0.996	1.37518e-21	0	gabarapb
snx5	1.24098e-25	0.962676	0.995	0.996	3.13583e-21	0	snx5
postnb	1.87396e-25	1.34306	0.981	0.976	4.7353e-21	0	postnb
mxd1	1.99502e-25	1.81691	0.688	0.526	5.04122e-21	0	mxd1
ppdpfb	3.51659e-25	0.700076	1	0.999	8.88608e-21	0	ppdpfb
clta	9.94668e-25	0.650408	1	1	2.51343e-20	0	clta
mtmr8	2.40622e-24	1.17871	0.97	0.945	6.08029e-20	0	mtmr8
tfec	6.04518e-24	2.36299	0.636	0.484	1.52756e-19	0	tfec
adam8a	7.20112e-24	2.05906	0.851	0.756	1.81965e-19	0	adam8a
snx2	1.44554e-23	1.28645	0.925	0.863	3.65274e-19	0	snx2
akr1a1b	3.04267e-23	1.27092	0.923	0.864	7.68852e-19	0	akr1a1b
cyp1a	5.7351e-23	0.945319	0.981	0.985	1.4492e-18	0	cyp1a
rpl3	7.00895e-22	0.306084	1	1	1.77109e-17	0	rpl3
slc17a5	2.49283e-21	1.18275	0.863	0.827	6.29914e-17	0	slc17a5
cst14a.2	2.55794e-21	0.770257	0.972	0.942	6.46366e-17	0	cst14a.2
cltca	7.61389e-21	1.00057	0.996	0.994	1.92395e-16	0	cltca
myo7aa	1.02836e-20	1.27577	0.755	0.601	2.59855e-16	0	myo7aa
c1qtnf6a	1.22009e-20	1.69302	0.685	0.528	3.08304e-16	0	c1qtnf6a
si:ch73-86n18.1	1.45954e-20	0.637175	1	1	3.6881e-16	0	si:ch73-86n18.1
tek	3.81642e-20	0.840851	0.998	0.998	9.6437e-16	0	tek
aplnrb	7.45917e-20	0.543536	1	1	1.88486e-15	0	aplnrb
zgc:110591	2.20148e-19	1.3989	0.909	0.863	5.56292e-15	0	zgc:110591
fthl27	3.81288e-19	0.529932	0.998	1	9.63476e-15	0	fthl27
mmp2	4.23545e-19	0.856917	0.97	0.944	1.07026e-14	0	mmp2
npl	1.11531e-18	1.48629	0.897	0.84	2.81828e-14	0	npl
fam107b	1.12261e-18	0.548636	0.998	0.985	2.83673e-14	0	fam107b
tent5ab	3.01271e-18	1.76807	0.739	0.639	7.61282e-14	0	tent5ab
si:ch211-66e2.3	3.22003e-18	1.07534	0.925	0.903	8.1367e-14	0	si:ch211-66e2.3
sash1b	5.8358e-18	1.41797	0.828	0.743	1.47465e-13	0	sash1b
dap1b	1.03875e-17	0.623319	0.984	0.975	2.62483e-13	0	dap1b
cryl1	1.06214e-17	1.1911	0.867	0.799	2.68391e-13	0	cryl1
gas6	1.51693e-17	0.642788	0.993	0.99	3.83312e-13	0	gas6
cotl1	1.59742e-17	0.520943	1	1	4.03652e-13	0	cotl1
napsa	2.61878e-17	1.58805	0.758	0.686	6.6174e-13	0	napsa
fuca1.1	2.86372e-17	1.58712	0.776	0.685	7.23634e-13	0	fuca1.1
pxk	4.23913e-17	2.17976	0.594	0.442	1.07118e-12	0	pxk
hhex	4.7546e-17	0.650932	0.989	0.979	1.20144e-12	0	hhex
bzw1b	7.34919e-17	0.800594	0.951	0.934	1.85707e-12	0	bzw1b
snx8a	8.59542e-17	1.50247	0.795	0.689	2.17198e-12	0	snx8a
tspan18b	8.68967e-17	0.507481	1	0.999	2.19579e-12	0	tspan18b
arrb2b	1.29875e-16	0.542689	1	1	3.2818e-12	0	arrb2b
swap70b	1.51419e-16	1.09761	0.897	0.853	3.82621e-12	0	swap70b
gamt	1.84892e-16	1.01499	0.811	0.701	4.67204e-12	0	gamt
scpep1	5.11324e-16	1.24341	0.881	0.828	1.29207e-11	0	scpep1
ap1b1	5.28409e-16	0.807134	0.982	0.981	1.33524e-11	0	ap1b1
aqp7	1.07792e-15	0.921473	0.746	0.625	2.72378e-11	0	aqp7
thbs1b	1.13096e-15	1.58324	0.898	0.853	2.85782e-11	0	thbs1b
cpvl	1.18529e-15	1.10716	0.921	0.884	2.99511e-11	0	cpvl
ctsz	1.26046e-15	1.23459	0.893	0.856	3.18506e-11	0	ctsz
col18a1a	2.56105e-15	1.22889	0.753	0.651	6.47153e-11	0	col18a1a
tpte	6.29332e-15	0.840082	0.979	0.977	1.59026e-10	0	tpte
tpcn3	7.5297e-15	0.823092	0.968	0.95	1.90268e-10	0	tpcn3
si:ch73-92i20.1:1	7.88927e-15	2.44984	0.17	0.055	1.99354e-10	0	si:ch73-92i20.1:1
ms4a17a.9	1.04476e-14	0.636777	0.988	0.973	2.64001e-10	0	ms4a17a.9
slc9a7	1.11058e-14	1.22355	0.835	0.751	2.80633e-10	0	slc9a7
ifi30	1.13098e-14	0.965781	0.958	0.948	2.85787e-10	0	ifi30
si:dkey-52l18.4	1.71074e-14	0.785046	0.939	0.916	4.32287e-10	0	si:dkey-52l18.4
lfng	1.86168e-14	0.349564	1	1	4.70428e-10	0	lfng
exoc6	2.4901e-14	0.970587	0.972	0.936	6.29223e-10	0	exoc6
zgc:174888	2.80435e-14	0.712294	0.851	0.775	7.08631e-10	0	zgc:174888
vamp5	3.00108e-14	0.673273	0.995	0.985	7.58343e-10	0	vamp5
cst14b.1	3.30177e-14	1.34149	0.65	0.531	8.34324e-10	0	cst14b.1
elovl1b	4.31512e-14	0.761066	0.937	0.897	1.09039e-09	0	elovl1b
slc16a9a	5.5165e-14	3.09456	0.415	0.266	1.39396e-09	0	slc16a9a
si:ch211-51a6.2	6.24584e-14	2.15967	0.408	0.262	1.57826e-09	0	si:ch211-51a6.2
gdpd5b	1.10677e-13	1.48671	0.496	0.338	2.79669e-09	0	gdpd5b
selenbp1	1.19429e-13	0.739867	0.926	0.91	3.01785e-09	0	selenbp1
eef1a1l1	1.27162e-13	0.193946	1	1	3.21327e-09	0	eef1a1l1
cndp2	1.67371e-13	1.16201	0.918	0.878	4.22929e-09	0	cndp2
snx22	1.83857e-13	2.57788	0.338	0.199	4.64587e-09	0	snx22
abca1a	2.97433e-13	0.742594	0.909	0.876	7.51584e-09	0	abca1a
fuca2	5.24194e-13	1.05565	0.947	0.931	1.32459e-08	0	fuca2
wnt9a	5.35927e-13	2.6443	0.319	0.181	1.35423e-08	0	wnt9a
pfn2	5.65699e-13	0.329418	1	1	1.42946e-08	0	pfn2
exoc3l2a	1.01247e-12	1.05475	0.823	0.773	2.55841e-08	0	exoc3l2a
zgc:152830	1.24935e-12	0.973395	0.961	0.963	3.15698e-08	0	zgc:152830
lsp1b	1.25007e-12	0.583839	0.996	0.998	3.15881e-08	0	lsp1b
tspan36	1.67347e-12	1.89407	0.597	0.478	4.2287e-08	0	tspan36
bnc2	1.90831e-12	1.95307	0.576	0.448	4.82211e-08	0	bnc2
tmem176	2.06023e-12	0.950195	0.9	0.888	5.206e-08	0	tmem176
bloc1s6	2.49384e-12	0.983706	0.79	0.72	6.3017e-08	0	bloc1s6
naga	2.78871e-12	0.809055	0.984	0.977	7.04679e-08	0	naga
gdi2	3.08833e-12	0.386742	1	1	7.80389e-08	0	gdi2
foxp4	3.36624e-12	0.941203	0.888	0.868	8.50615e-08	0	foxp4
rab11fip3	3.46962e-12	1.69045	0.536	0.409	8.76738e-08	0	rab11fip3
adra1d	4.74253e-12	0.728282	0.911	0.871	1.19839e-07	0	adra1d
tpp1	5.13277e-12	1.61603	0.695	0.605	1.297e-07	0	tpp1
pmp22a	5.63742e-12	0.38414	0.995	0.995	1.42452e-07	0	pmp22a
celsr1b	7.06618e-12	1.56781	0.543	0.418	1.78555e-07	0	celsr1b
cxcl12b	8.48008e-12	1.12635	0.781	0.675	2.14283e-07	0	cxcl12b
pim3	1.42382e-11	0.830266	0.974	0.961	3.59785e-07	0	pim3
st6gal2a	1.43929e-11	1.29808	0.45	0.309	3.63694e-07	0	st6gal2a
hs3st3b1b	1.45884e-11	1.65391	0.464	0.334	3.68634e-07	0	hs3st3b1b
ap2m1a	2.54605e-11	0.314516	1	1	6.43362e-07	0	ap2m1a
tmem59l	3.24273e-11	2.02236	0.583	0.508	8.19406e-07	0	tmem59l
ZNF521	3.86475e-11	1.48231	0.56	0.433	9.76585e-07	0	ZNF521
hmgb3a	4.0137e-11	0.432148	1	0.998	1.01422e-06	0	hmgb3a
csrnp1b	8.11066e-11	0.985036	0.788	0.675	2.04948e-06	0	csrnp1b
midn	1.52701e-10	0.48932	0.998	0.998	3.8586e-06	0	midn
si:ch211-212k18.8	1.74762e-10	0.637442	0.827	0.779	4.41607e-06	0	si:ch211-212k18.8
add2	1.76646e-10	1.89396	0.391	0.261	4.46368e-06	0	add2
mgat1b	1.81732e-10	0.857528	0.961	0.94	4.59219e-06	0	mgat1b
si:ch211-286o17.1	1.84289e-10	0.695779	0.876	0.802	4.65681e-06	0	si:ch211-286o17.1
ushbp1	2.4779e-10	0.450077	1	1	6.2614e-06	0	ushbp1
dpp7	4.64495e-10	1.05683	0.893	0.883	1.17373e-05	0	dpp7
lmo2	4.95409e-10	0.447366	0.998	0.996	1.25185e-05	0	lmo2
atp6v1ba	5.68463e-10	0.79151	0.947	0.941	1.43645e-05	0	atp6v1ba
pcnx1	5.71102e-10	1.39659	0.655	0.56	1.44312e-05	0	pcnx1
2024-09-02	5.71332e-10	0.281155	1	1	1.4437e-05	0	2024-09-02
cysltr1	6.60389e-10	2.6064	0.264	0.151	1.66874e-05	0	cysltr1
rpl4	6.77652e-10	0.211222	1	1	1.71236e-05	0	rpl4
tle3b	6.94764e-10	1.10429	0.73	0.648	1.7556e-05	0	tle3b
si:ch211-173m16.2	8.32304e-10	1.67263	0.182	0.082	2.10315e-05	0	si:ch211-173m16.2
zgc:123103	8.51308e-10	1.31541	0.172	0.074	2.15117e-05	0	zgc:123103
si:dkey-16p21.8	1.16678e-09	1.63856	0.513	0.403	2.94833e-05	0	si:dkey-16p21.8
CABZ01029422.1	1.40669e-09	0.789062	0.709	0.626	3.55456e-05	0	CABZ01029422.1
mcm2	1.8857e-09	0.743137	0.982	0.981	4.76498e-05	0	mcm2
amdhd2	2.03307e-09	1.16053	0.811	0.747	5.13737e-05	0	amdhd2
fam167b	2.12074e-09	1.11987	0.44	0.305	5.35889e-05	0	fam167b
man2a1	2.2686e-09	0.878418	0.839	0.791	5.73253e-05	0	man2a1
CU927890.1	2.31887e-09	0.538141	0.989	0.988	5.85956e-05	0	CU927890.1
si:ch73-386h18.1	2.45149e-09	0.904684	0.947	0.943	6.19468e-05	0	si:ch73-386h18.1
ppib	3.11691e-09	0.271005	1	1	7.87612e-05	0	ppib
ppt1	3.41921e-09	0.606734	1	0.998	8.64e-05	0	ppt1
dusp22b	3.7794e-09	1.1224	0.616	0.513	9.55017e-05	0	dusp22b
hif1al	3.86021e-09	0.440919	0.996	0.994	9.75437e-05	0	hif1al
adcy7	3.99632e-09	1.4333	0.541	0.413	0.000100983	0	adcy7
afap1l1a	4.10151e-09	1.63559	0.466	0.344	0.000103641	0	afap1l1a
lamp1a	5.68769e-09	1.97533	0.457	0.357	0.000143722	0	lamp1a
rpl6	6.07468e-09	0.214011	1	1	0.000153501	0	rpl6
slc7a8a	6.68373e-09	1.86103	0.529	0.416	0.000168891	0	slc7a8a
USP53	7.02655e-09	0.810463	0.305	0.181	0.000177554	0	USP53
slc35f6	7.21245e-09	0.963729	0.856	0.822	0.000182251	0	slc35f6
ccdc28a:1	8.99587e-09	3.045	0.354	0.253	0.000227317	0	ccdc28a:1
si:dkey-151g10.6	9.6203e-09	0.232119	1	1	0.000243095	0	si:dkey-151g10.6
gask1b	9.96577e-09	0.588049	0.991	0.99	0.000251825	0	gask1b
sparc	1.02873e-08	0.582098	0.996	0.994	0.000259949	0	sparc
lima1a	1.0615e-08	0.685236	0.963	0.96	0.000268231	0	lima1a
cdca7a	1.08016e-08	0.868551	0.912	0.878	0.000272944	0	cdca7a
rps2	1.35799e-08	0.180377	1	1	0.00034315	0	rps2
mgst3b	1.36839e-08	0.302541	1	0.998	0.000345779	0	mgst3b
ms4a17a.11	1.41841e-08	0.633684	0.867	0.863	0.000358418	0	ms4a17a.11
nr2f5	1.70947e-08	1.80699	0.375	0.268	0.000431966	0	nr2f5
gpr1	1.81924e-08	1.36928	0.392	0.271	0.000459705	0	gpr1
eef2b	1.91111e-08	0.252814	1	1	0.000482918	0	eef2b
bahcc1b	2.62469e-08	1.26724	0.662	0.574	0.000663234	0	bahcc1b
cyth3a	3.00952e-08	1.13815	0.729	0.661	0.000760476	0	cyth3a
dact2	3.14792e-08	0.979618	0.862	0.835	0.000795449	0	dact2
pycard	3.17579e-08	0.448343	0.89	0.826	0.000802491	0	pycard
cst14a.1	3.41244e-08	0.920761	0.496	0.384	0.00086229	0	cst14a.1
eno3	3.67818e-08	0.586704	0.939	0.916	0.000929438	0	eno3
fthl31	3.77282e-08	0.402098	0.975	0.963	0.000953353	0	fthl31
slc22a16	3.77517e-08	1.08365	0.52	0.424	0.000953949	0	slc22a16
sptlc2a	4.28383e-08	0.537774	0.982	0.982	0.00108248	0	sptlc2a
shisa2a	4.39167e-08	1.81504	0.382	0.281	0.00110973	0	shisa2a
osbpl10b	4.44467e-08	1.00478	0.772	0.683	0.00112312	0	osbpl10b
calcrlb	5.34968e-08	0.550143	0.939	0.924	0.00135181	0	calcrlb
rpl30	6.06127e-08	0.278707	1	1	0.00153162	0	rpl30
mcm4	6.23347e-08	0.764643	0.944	0.947	0.00157513	0	mcm4
cyp1c2	6.28399e-08	2.41661	0.105	0.039	0.0015879	0	cyp1c2
hsp90ab1	6.39033e-08	0.216235	1	1	0.00161477	0	hsp90ab1
zfp36l1b	6.85611e-08	0.570916	1	0.996	0.00173247	0	zfp36l1b
ldhba	7.52784e-08	0.558254	0.916	0.911	0.00190221	0	ldhba
prdx2	9.60032e-08	0.430973	0.984	0.971	0.00242591	0	prdx2
slc43a1b	9.98931e-08	0.997735	0.634	0.558	0.0025242	0	slc43a1b
snx4	9.99999e-08	0.860361	0.783	0.734	0.0025269	0	snx4
snx9a	1.05466e-07	0.930278	0.615	0.527	0.00266501	0	snx9a
mrc1b	1.07099e-07	3.09862	0.303	0.214	0.00270629	0	mrc1b
sh3tc2	1.27468e-07	0.560963	0.982	0.976	0.00322099	0	sh3tc2
npc2	1.29041e-07	0.635549	0.949	0.936	0.00326073	0	npc2
reep3a	1.4104e-07	0.789653	0.828	0.773	0.00356394	0	reep3a
ctsh	1.49807e-07	1.43015	0.606	0.531	0.00378548	0	ctsh
fthl29	1.72438e-07	0.485293	0.876	0.82	0.00435732	0	fthl29
PLBD2	1.74837e-07	0.946023	0.786	0.716	0.00441796	0	PLBD2
rpl23a	1.84056e-07	0.223716	1	1	0.0046509	0	rpl23a
npr1a	1.94229e-07	0.704457	0.956	0.949	0.00490798	0	npr1a
rassf4a	2.03139e-07	1.29376	0.434	0.331	0.00513313	0	rassf4a
zgc:153372	2.27871e-07	1.55696	0.331	0.234	0.00575808	0	zgc:153372
ablim3	2.38978e-07	1.52064	0.45	0.354	0.00603874	0	ablim3
RPS17	2.58032e-07	0.253527	1	1	0.00652021	0	RPS17
rxraa	2.5901e-07	0.68735	0.776	0.714	0.00654493	0	rxraa
si:ch211-147k10.5	3.02243e-07	1.89006	0.419	0.325	0.00763737	0	si:ch211-147k10.5
ccdc28a	3.03748e-07	1.02261	0.238	0.139	0.0076754	0	ccdc28a
tnfaip2b	3.12655e-07	0.573865	0.974	0.973	0.00790049	0	tnfaip2b
mcm5	3.17865e-07	0.520763	0.981	0.976	0.00803214	0	mcm5
atp6v0e1	3.21503e-07	0.478572	0.946	0.914	0.00812407	0	atp6v0e1
hvcn1	3.35137e-07	0.627591	0.926	0.916	0.00846858	0	hvcn1
im:7151449	3.49717e-07	2.37393	0.212	0.125	0.00883701	0	im:7151449
uap1l1	3.57367e-07	0.790882	0.767	0.714	0.00903031	0	uap1l1
hoxa4a	3.61831e-07	1.1738	0.585	0.51	0.00914311	0	hoxa4a
entpd1	3.62085e-07	0.4458	0.986	0.98	0.00914953	0	entpd1
rpl36	4.08469e-07	0.254612	1	1	0.0103216	0	rpl36
lhx6	4.63964e-07	2.41012	0.35	0.259	0.0117239	0	lhx6
pitpnc1b	5.13957e-07	1.65305	0.317	0.213	0.0129872	0	pitpnc1b
meis2a:1	5.49332e-07	1.31401	0.538	0.451	0.0138811	0	meis2a:1
pde4ba	5.73875e-07	0.397542	1	0.997	0.0145012	0	pde4ba
bloc1s1	5.8261e-07	1.01646	0.41	0.297	0.014722	0	bloc1s1
atp6v1e1b	6.07487e-07	0.883741	0.774	0.733	0.0153506	0	atp6v1e1b
tnfsf10	6.58475e-07	1.55067	0.522	0.443	0.016639	0	tnfsf10
psap	6.69476e-07	0.737687	0.979	0.984	0.016917	0	psap
rpl26	7.13688e-07	0.240831	0.993	0.994	0.0180342	0	rpl26
man2b1	7.15171e-07	1.17736	0.737	0.678	0.0180717	0	man2b1
ralgapa2	7.31605e-07	0.85853	0.793	0.721	0.0184869	0	ralgapa2
arl4aa	7.56457e-07	0.543904	0.925	0.896	0.0191149	0	arl4aa
rpsa	8.35806e-07	0.175182	1	1	0.02112	0	rpsa
si:ch211-284e13.6	8.70184e-07	2.28054	0.308	0.216	0.0219887	0	si:ch211-284e13.6
cecr2	9.13203e-07	0.657839	0.588	0.492	0.0230757	0	cecr2
atp6v1f	9.19808e-07	0.89815	0.648	0.591	0.0232426	0	atp6v1f
si:ch73-380l10.2	9.60152e-07	3.4017	0.077	0.026	0.0242621	0	si:ch73-380l10.2
tob1b	9.942e-07	0.838781	0.758	0.684	0.0251224	0	tob1b
selenoj	9.98267e-07	0.903705	0.676	0.609	0.0252252	0	selenoj
crlf1b	1.02885e-06	2.10774	0.31	0.219	0.0259979	0	crlf1b
ctsf	1.09493e-06	0.5769	0.974	0.964	0.0276678	0	ctsf
myo9b	1.09618e-06	1.70121	0.054	0.013	0.0276993	0	myo9b
dap1b:1	1.10146e-06	0.463615	0.916	0.926	0.0278328	0	dap1b:1
fli1b	1.19781e-06	0.25989	1	1	0.0302676	0	fli1b
agfg1a	1.22967e-06	0.886856	0.602	0.517	0.0310725	0	agfg1a
rapgef4	1.39423e-06	4.19905	0.075	0.025	0.0352309	0	rapgef4
exoc3l2b	1.4423e-06	1.3044	0.592	0.513	0.0364454	0	exoc3l2b
ptpn11b	1.75824e-06	1.12793	0.632	0.56	0.044429	0	ptpn11b
kif1ab	1.79254e-06	6.44447	0.058	0.016	0.0452956	0	kif1ab
fzd7a	1.82349e-06	0.576185	0.979	0.971	0.0460779	0	fzd7a
rab1ab	1.92499e-06	0.527577	0.986	0.992	0.0486424	0	rab1ab
hexa	1.95482e-06	0.952199	0.783	0.747	0.0493963	0	hexa
zgc:172053	1.9665e-06	3.14885	0.058	0.016	0.0496915	0	zgc:172053
tbc1d4	2.0247e-06	0.522344	0.979	0.977	0.0511622	0	tbc1d4
si:ch211-212k18.7	2.15524e-06	2.49698	0.294	0.208	0.0544607	0	si:ch211-212k18.7
hipk2	2.19521e-06	1.44072	0.545	0.453	0.0554708	0	hipk2
mtss1lb	2.20138e-06	0.86676	0.736	0.676	0.0556267	0	mtss1lb
znf521	2.52519e-06	1.56061	0.466	0.366	0.0638091	0	znf521
ppp1r14bb	2.57525e-06	0.421141	0.979	0.99	0.065074	0	ppp1r14bb
rps28	2.65754e-06	0.190026	1	1	0.0671533	0	rps28
serinc2	2.71036e-06	0.614368	0.944	0.942	0.0684882	0	serinc2
si:dkey-9i23.16	2.7599e-06	0.949457	0.51	0.415	0.0697399	0	si:dkey-9i23.16
rpl23	2.87955e-06	0.231656	1	1	0.0727635	0	rpl23
sik1	2.93882e-06	1.18935	0.622	0.538	0.0742611	0	sik1
galm	3.19227e-06	0.84213	0.648	0.557	0.0806655	0	galm
eif4ebp1	3.26751e-06	0.774542	0.832	0.808	0.0825667	0	eif4ebp1
rpl13	3.75875e-06	0.216973	1	1	0.0949799	0	rpl13
dram2b	3.93487e-06	1	0.765	0.733	0.0994302	0	dram2b
igfbp1a.1	1.87385e-120	2.91606	1	0.995	4.73502e-116	1	igfbp1a
cd81b.1	2.37598e-117	2.93415	0.995	0.943	6.00386e-113	1	cd81b
csrp2.1	2.77149e-102	2.5575	0.995	0.924	7.00327e-98	1	csrp2
smox.1	1.36781e-94	2.15948	0.995	0.985	3.45632e-90	1	smox
adra1aa.1	2.73241e-88	2.27954	0.988	0.827	6.90454e-84	1	adra1aa
f2rl2.1	6.35569e-83	2.05613	0.993	0.886	1.60602e-78	1	f2rl2
lrrc15.1	6.99957e-81	2.18469	0.986	0.896	1.76872e-76	1	lrrc15
rbpms2b.1	8.8951e-80	1.83133	0.988	0.94	2.2477e-75	1	rbpms2b
flt1.1	1.90046e-79	2.24031	0.995	0.985	4.80227e-75	1	flt1
sox7.1	8.01808e-79	1.41799	1	0.999	2.02609e-74	1	sox7
podxl.1	1.48266e-78	1.57352	1	0.998	3.74653e-74	1	podxl
crip2.1	1.74344e-76	1.17034	1	1	4.4055e-72	1	crip2
fxyd1.1	3.76234e-75	2.87053	0.893	0.676	9.50705e-71	1	fxyd1
si:ch211-156j16.1.1	9.53667e-75	0.870944	1	1	2.40982e-70	1	si:ch211-156j16.1
esm1.1	3.14646e-73	2.4698	1	0.996	7.9508e-69	1	esm1
slco1c1.1	4.26009e-73	3.57323	0.881	0.626	1.07648e-68	1	slco1c1
ywhabl.1	6.68349e-73	1.18669	1	1	1.68885e-68	1	ywhabl
hopx.1	8.54077e-73	1.83557	0.974	0.848	2.15817e-68	1	hopx
slco1d1.1	1.04769e-71	3.86655	0.891	0.675	2.64742e-67	1	slco1d1
dll4.1	1.25978e-70	1.87104	0.998	0.994	3.18334e-66	1	dll4
hlx1.1	2.758e-70	1.56824	0.99	0.976	6.9692e-66	1	hlx1
zgc:158423.1	3.31925e-70	3.77222	0.898	0.662	8.3874e-66	1	zgc:158423
CABZ01030107.1.1	7.67583e-70	1.0947	0.988	0.932	1.93961e-65	1	CABZ01030107.1
pdgfbb.1	1.0889e-69	2.81369	0.914	0.723	2.75154e-65	1	pdgfbb
slc7a5.1	5.79592e-68	4.36205	0.758	0.419	1.46457e-63	1	slc7a5
mmp25b.1	1.34369e-67	3.45578	0.879	0.661	3.39537e-63	1	mmp25b
ehbp1l1b.1	1.38989e-66	2.15668	0.922	0.729	3.51211e-62	1	ehbp1l1b
igfbp7.1	1.67206e-66	1.69134	1	0.998	4.22514e-62	1	igfbp7
agtr2.1	1.19539e-65	1.73015	0.998	0.949	3.02062e-61	1	agtr2
sema3ga.1	2.57072e-64	2.36889	0.912	0.697	6.49595e-60	1	sema3ga
agrn.1	5.40124e-64	1.89558	0.99	0.929	1.36484e-59	1	agrn
CABZ01076275.1.1	4.3294e-62	2.60619	0.914	0.73	1.094e-57	1	CABZ01076275.1
ca2.1	1.12593e-61	4.90036	0.724	0.387	2.84511e-57	1	ca2
ttyh2l.1	2.26085e-61	2.09566	0.964	0.873	5.71293e-57	1	ttyh2l
fabp11a.1	4.58635e-61	3.42435	0.998	0.985	1.15892e-56	1	fabp11a
notchl.1	1.87236e-60	1.45319	1	0.998	4.73127e-56	1	notchl
eogt.1	1.35076e-57	1.67621	0.957	0.828	3.41323e-53	1	eogt
fscn1a.1	1.98805e-57	1.23836	1	1	5.02359e-53	1	fscn1a
slc16a1a.1	7.1886e-56	3.76715	0.922	0.752	1.81649e-51	1	slc16a1a
hkdc1.1	1.80975e-54	3.1511	0.819	0.58	4.57306e-50	1	hkdc1
lrrn1.1	4.10959e-54	1.51371	0.986	0.945	1.03845e-49	1	lrrn1
zgc:112332.1	1.93991e-53	1.82797	0.943	0.796	4.90196e-49	1	zgc:112332
nrp1b.1	6.88589e-53	1.68995	0.976	0.858	1.73999e-48	1	nrp1b
rasgrp3.1	3.07838e-51	2.14604	0.943	0.786	7.77875e-47	1	rasgrp3
foxf2a.1	6.27948e-51	1.26619	0.988	0.941	1.58676e-46	1	foxf2a
rgs3a.1	8.07585e-51	1.70351	0.988	0.953	2.04069e-46	1	rgs3a
polr2b.1	1.84327e-50	1.34024	1	1	4.65776e-46	1	polr2b
kdrl.1	3.96631e-50	0.999575	1	1	1.00225e-45	1	kdrl
prdm1a.1	4.1042e-50	2.26961	0.964	0.901	1.03709e-45	1	prdm1a
cldn5b.1	2.38847e-47	1.344	1	0.999	6.03542e-43	1	cldn5b
llgl2.1	5.65631e-47	1.49817	0.988	0.963	1.42929e-42	1	llgl2
spry4.1	1.30159e-46	2.38183	0.917	0.807	3.28898e-42	1	spry4
cxcr4a.1	1.7836e-46	2.91027	0.979	0.941	4.50699e-42	1	cxcr4a
CABZ01073265.1.1	4.49321e-46	3.23382	0.755	0.488	1.13539e-41	1	CABZ01073265.1
zic2a.1	2.86298e-45	1.6502	0.99	0.945	7.23446e-41	1	zic2a
scarb2a.1	1.44358e-44	1.36869	0.998	0.998	3.64778e-40	1	scarb2a
bsg.1	1.62034e-44	1.72162	0.96	0.87	4.09444e-40	1	bsg
phlda2.1	1.86047e-43	3.05522	0.827	0.631	4.70123e-39	1	phlda2
ppp1r14ba.1	4.61907e-43	1.91618	0.857	0.669	1.16719e-38	1	ppp1r14ba
abcb4.1	6.99703e-43	2.45589	0.798	0.56	1.76808e-38	1	abcb4
palm1b.1	1.29392e-42	1.32442	0.99	0.956	3.26961e-38	1	palm1b
pcdh1b.1	7.61762e-42	1.21686	0.993	0.958	1.9249e-37	1	pcdh1b
dcbld1.1	3.77204e-41	1.76706	0.929	0.799	9.53156e-37	1	dcbld1
tcf12.1	5.68538e-41	1.70714	0.983	0.933	1.43664e-36	1	tcf12
tmsb4x.1	6.15767e-41	0.598786	1	1	1.55598e-36	1	tmsb4x
ncam3.1	2.3493e-40	3.11682	0.905	0.733	5.93645e-36	1	ncam3
mxi1.1	6.32401e-40	1.80324	0.971	0.892	1.59801e-35	1	mxi1
sema3ab.1	1.06753e-39	1.13791	0.993	0.98	2.69754e-35	1	sema3ab
abcg2a.1	1.25714e-39	1.42296	0.99	0.96	3.17666e-35	1	abcg2a
angpt2a.1	2.9742e-39	5.4357	0.713	0.493	7.5155e-35	1	angpt2a
mpped2a.1	5.81305e-39	1.3577	0.929	0.839	1.4689e-34	1	mpped2a
abcc4.1	7.79973e-39	2.48101	0.694	0.434	1.97091e-34	1	abcc4
pvrl2l.1	1.36091e-38	2.7128	0.591	0.314	3.43887e-34	1	pvrl2l
robo4.1	2.06177e-38	1.05622	0.998	0.991	5.20989e-34	1	robo4
MYO1D.1	3.17705e-38	2.21692	0.698	0.422	8.02809e-34	1	MYO1D
st3gal3a.1	7.19942e-38	1.42952	0.993	0.968	1.81922e-33	1	st3gal3a
epas1a.1	1.49632e-37	2.47241	0.715	0.474	3.78106e-33	1	epas1a
dock9b.1	2.64926e-37	2.0921	0.765	0.541	6.69443e-33	1	dock9b
qki2.1	8.23271e-37	1.91865	0.879	0.742	2.08032e-32	1	qki2
abhd17b.1	3.65117e-36	1.67053	0.933	0.843	9.22613e-32	1	abhd17b
kalrnb.1	2.34353e-35	1.51452	0.931	0.809	5.92187e-31	1	kalrnb
hdac9b.1	4.23686e-35	2.01378	0.836	0.641	1.07061e-30	1	hdac9b
arhgef12b.1	5.35361e-35	1.2621	0.986	0.971	1.3528e-30	1	arhgef12b
si:dkey-126g1.9.1	7.67985e-35	1.502	0.879	0.734	1.94062e-30	1	si:dkey-126g1.9
foxf2b.1	2.30521e-34	3.3693	0.665	0.416	5.82503e-30	1	foxf2b
tmem51b.1	2.34286e-34	1.6682	0.791	0.561	5.92018e-30	1	tmem51b
epas1b.1	9.27808e-34	2.14137	0.767	0.558	2.34448e-29	1	epas1b
bcl6b.1	5.67572e-33	1.72441	0.993	0.967	1.4342e-28	1	bcl6b
pik3cg.1	6.37507e-33	1.29859	0.938	0.825	1.61092e-28	1	pik3cg
efnb2a.1	7.29928e-33	1.70695	0.926	0.85	1.84445e-28	1	efnb2a
ehd1b.1	7.76939e-33	0.824878	1	1	1.96325e-28	1	ehd1b
cd22.1	1.27273e-32	3.40712	0.506	0.24	3.21605e-28	1	cd22
tbx3a.1	2.45881e-32	2.47885	0.748	0.556	6.21317e-28	1	tbx3a
pdgfba.1	2.74029e-32	1.77932	0.907	0.826	6.92443e-28	1	pdgfba
pfkpa	4.02822e-32	1.31941	0.941	0.868	1.01789e-27	1	pfkpa
jag2b.1	6.01815e-32	1.25122	0.979	0.937	1.52073e-27	1	jag2b
tshz1.1	6.30219e-32	1.90117	0.846	0.688	1.5925e-27	1	tshz1
hbegfb.1	7.47471e-32	5.40705	0.599	0.369	1.88878e-27	1	hbegfb
hic1.1	7.87626e-32	2.02572	0.874	0.716	1.99025e-27	1	hic1
lpar2a.1	4.30562e-31	1.38181	0.96	0.914	1.08799e-26	1	lpar2a
itga4.1	6.57053e-31	1.71926	0.969	0.921	1.66031e-26	1	itga4
cd82b.1	7.63861e-31	1.97843	0.862	0.715	1.9302e-26	1	cd82b
si:dkeyp-73d8.8.1	1.21916e-30	2.34287	0.444	0.185	3.08069e-26	1	si:dkeyp-73d8.8
lcp1.1	1.96497e-30	1.48989	0.914	0.821	4.96528e-26	1	lcp1
CABZ01075125.1.1	1.11115e-29	0.838756	0.931	0.804	2.80777e-25	1	CABZ01075125.1
lef1.1	1.1327e-29	1.90824	0.781	0.585	2.86222e-25	1	lef1
CABZ01080702.1.1	2.1209e-29	1.1375	0.945	0.892	5.35929e-25	1	CABZ01080702.1
si:dkey-19b23.8.1	2.28005e-29	1.17761	0.976	0.919	5.76146e-25	1	si:dkey-19b23.8
si:dkeyp-73d8.6.1	2.5555e-29	2.26678	0.411	0.161	6.4575e-25	1	si:dkeyp-73d8.6
aqp1a.1.1	2.70733e-29	0.863419	1	1	6.84116e-25	1	aqp1a.1
tspan14.1	3.32936e-29	0.824221	1	0.998	8.41296e-25	1	tspan14
mmp25a.1	5.35274e-29	4.07398	0.613	0.401	1.35258e-24	1	mmp25a
si:ch211-225h24.2.1	8.39461e-29	1.63138	0.732	0.508	2.12123e-24	1	si:ch211-225h24.2
pald1a.1	9.86617e-29	0.961728	1	1	2.49308e-24	1	pald1a
slc31a1.1	1.1163e-28	1.54071	0.881	0.73	2.82078e-24	1	slc31a1
oaz2a.1	1.74944e-28	1.58288	0.979	0.941	4.42066e-24	1	oaz2a
col4a1.1	1.75397e-28	1.36997	0.905	0.784	4.43211e-24	1	col4a1
lamb1b.1	3.32779e-28	1.24697	0.974	0.944	8.40899e-24	1	lamb1b
ednraa	5.77911e-28	0.714722	1	1	1.46032e-23	1	ednraa
coro2bb.1	6.97925e-28	1.60106	0.767	0.574	1.76359e-23	1	coro2bb
rtn1a.1	1.05987e-27	1.14842	0.971	0.907	2.67817e-23	1	rtn1a
cav1.1	1.14412e-27	1.23768	0.929	0.805	2.89107e-23	1	cav1
cnn3a.1	1.16053e-27	0.828079	1	1	2.93255e-23	1	cnn3a
dachd.1	1.6194e-27	2.2793	0.682	0.475	4.09205e-23	1	dachd
rbpms2a.1	1.8839e-27	1.16319	0.905	0.779	4.76041e-23	1	rbpms2a
rnd3a.1	2.24657e-27	1.43063	0.993	0.98	5.67685e-23	1	rnd3a
sc:d189.1	2.55099e-27	1.67162	0.819	0.67	6.4461e-23	1	sc:d189
stard9.1	3.19668e-27	1.67581	0.789	0.587	8.07769e-23	1	stard9
tmem229b.1	5.163e-27	3.56428	0.444	0.216	1.30464e-22	1	tmem229b
myl9a	5.39303e-27	0.92182	0.931	0.822	1.36276e-22	1	myl9a
afap1l1b.1	5.74213e-27	0.832826	1	0.998	1.45098e-22	1	afap1l1b
gnai2a.1	7.11313e-27	0.865947	0.998	0.998	1.79742e-22	1	gnai2a
wasf3b.1	1.97298e-26	0.664193	1	1	4.98551e-22	1	wasf3b
igfbp3.1	2.20264e-26	2.46728	0.767	0.61	5.56586e-22	1	igfbp3
slc29a1a	3.02436e-26	0.925196	0.981	0.897	7.64225e-22	1	slc29a1a
hspg2.1	3.03411e-26	1.41637	0.895	0.787	7.66689e-22	1	hspg2
wnk1a.1	3.95087e-26	1.34498	0.924	0.839	9.98346e-22	1	wnk1a
sat1a.2.1	4.61687e-26	1.27803	0.995	0.989	1.16664e-21	1	sat1a.2
si:ch211-250c4.4	5.18358e-26	1.15183	0.898	0.774	1.30984e-21	1	si:ch211-250c4.4
jupa.1	9.92053e-26	0.857387	0.995	0.994	2.50682e-21	1	jupa
palm1a.1	1.04023e-25	0.936285	0.99	0.98	2.62855e-21	1	palm1a
cdkn1ca.1	1.70936e-25	2.94611	0.672	0.491	4.31939e-21	1	cdkn1ca
trim69.1	1.71181e-25	1.54888	0.689	0.469	4.32558e-21	1	trim69
esama.1	1.80528e-25	0.667302	1	0.999	4.56177e-21	1	esama
cd99	2.13228e-25	0.855043	0.981	0.932	5.38805e-21	1	cd99
pcdh19.1	2.18558e-25	2.94731	0.52	0.295	5.52274e-21	1	pcdh19
pecam1.1	2.26276e-25	0.583103	1	1	5.71776e-21	1	pecam1
ppfibp1a.1	3.3544e-25	1.19753	0.979	0.912	8.47624e-21	1	ppfibp1a
gja5a.1	4.10899e-25	1.65261	0.781	0.645	1.0383e-20	1	gja5a
si:dkeyp-73d8.9.1	4.30337e-25	2.22792	0.352	0.134	1.08742e-20	1	si:dkeyp-73d8.9
gdi1.1	4.37609e-25	1.29605	0.933	0.844	1.1058e-20	1	gdi1
si:ch211-136m16.8.1	4.80725e-25	3.76035	0.409	0.194	1.21474e-20	1	si:ch211-136m16.8
tm4sf18.1	6.07532e-25	1.05876	0.998	0.979	1.53517e-20	1	tm4sf18
ets1	9.96201e-25	0.70779	0.995	0.995	2.5173e-20	1	ets1
nkd1.1	2.0799e-24	1.67565	0.938	0.894	5.25569e-20	1	nkd1
pik3r6a.1	3.69486e-24	1.5051	0.931	0.878	9.33654e-20	1	pik3r6a
mecom.1	1.29586e-23	2.20309	0.537	0.322	3.2745e-19	1	mecom
lama4.1	1.78185e-23	1.17739	1	0.991	4.50255e-19	1	lama4
hif1ab.1	1.91814e-23	1.12364	0.988	0.976	4.84695e-19	1	hif1ab
pkp3b.1	2.66804e-23	0.916027	1	0.99	6.74187e-19	1	pkp3b
hey1.1	3.18448e-23	3.10161	0.506	0.302	8.04685e-19	1	hey1
CABZ01067151.1.1	4.51995e-23	1.5748	0.556	0.332	1.14215e-18	1	CABZ01067151.1
si:dkey-16l2.20.1	4.92123e-23	1.7633	0.629	0.423	1.24355e-18	1	si:dkey-16l2.20
tuba1a.1	5.11986e-23	1.14787	0.834	0.65	1.29374e-18	1	tuba1a
perp.1	6.96659e-23	0.952949	1	0.992	1.76039e-18	1	perp
map4k2.1	7.69507e-23	1.14559	0.988	0.969	1.94447e-18	1	map4k2
pknox2.1	7.94681e-23	1.89257	0.715	0.534	2.00808e-18	1	pknox2
arhgef9b.1	8.49978e-23	1.0758	0.945	0.882	2.14781e-18	1	arhgef9b
cdh5.1	9.31078e-23	0.596786	1	0.999	2.35274e-18	1	cdh5
FO905040.1.1	1.71061e-22	1.44369	0.755	0.583	4.32254e-18	1	FO905040.1
serpinh1a.1	1.87331e-22	1.04632	0.895	0.76	4.73366e-18	1	serpinh1a
myct1b.1	2.06898e-22	1.31055	0.865	0.725	5.22812e-18	1	myct1b
pik3c2b.1	2.15603e-22	1.31742	0.838	0.714	5.44808e-18	1	pik3c2b
sox13.1	2.36129e-22	1.70969	0.881	0.787	5.96675e-18	1	sox13
tsc22d3.1	2.6453e-22	1.17809	0.976	0.929	6.68441e-18	1	tsc22d3
gapdhs	4.10146e-22	0.763484	1	1	1.0364e-17	1	gapdhs
apc.1	5.39198e-22	0.837613	0.988	0.98	1.3625e-17	1	apc
si:dkey-38p12.3.1	5.61715e-22	1.09293	0.96	0.89	1.4194e-17	1	si:dkey-38p12.3
myo10l3.1	6.26993e-22	2.11924	0.71	0.52	1.58435e-17	1	myo10l3
si:dkeyp-19e1.3.1	7.3188e-22	1.38254	0.722	0.531	1.84939e-17	1	si:dkeyp-19e1.3
hey2.1	1.38559e-21	1.94941	0.774	0.649	3.50126e-17	1	hey2
sh3gl3a.1	2.23086e-21	1.45511	0.822	0.672	5.63716e-17	1	sh3gl3a
tcima	3.02994e-21	1.54561	0.995	0.96	7.65636e-17	1	tcima
apln.1	3.05468e-21	1.39774	0.931	0.917	7.71886e-17	1	apln
btbd10b.1	4.64395e-21	0.744912	0.995	0.98	1.17348e-16	1	btbd10b
mex3b.1	5.32714e-21	0.993663	0.967	0.941	1.34612e-16	1	mex3b
plekhn1.1	5.91371e-21	1.90567	0.648	0.447	1.49434e-16	1	plekhn1
sema6a.1	6.31995e-21	1.65474	0.637	0.445	1.59699e-16	1	sema6a
msi2a.1	8.70733e-21	2.74738	0.492	0.288	2.20026e-16	1	msi2a
exoc3l1.1	1.20357e-20	0.964805	0.99	0.992	3.0413e-16	1	exoc3l1
lrrc8c.1	1.66396e-20	1.14267	0.933	0.861	4.20465e-16	1	lrrc8c
arl8.1	1.98926e-20	1.67681	0.76	0.628	5.02667e-16	1	arl8
dchs1b.1	2.09265e-20	1.48402	0.848	0.749	5.28791e-16	1	dchs1b
CU459155.1.1	2.19935e-20	3.29743	0.102	0.009	5.55753e-16	1	CU459155.1
neurl1b.1	2.38236e-20	1.30589	0.848	0.771	6.01998e-16	1	neurl1b
si:ch211-57n23.1.1	2.748e-20	2.14918	0.449	0.241	6.94393e-16	1	si:ch211-57n23.1
grb10b.1	3.59182e-20	1.47047	0.653	0.453	9.07618e-16	1	grb10b
srgap2.1	5.26303e-20	0.939175	0.988	0.938	1.32991e-15	1	srgap2
tmem108.1	5.26928e-20	0.642	0.998	0.998	1.33149e-15	1	tmem108
her9.1	6.83176e-20	2.8407	0.66	0.491	1.72632e-15	1	her9
itgb1b.1	7.42841e-20	0.920825	0.998	0.983	1.87709e-15	1	itgb1b
notch1b.1	9.22619e-20	0.83741	0.986	0.974	2.33136e-15	1	notch1b
grapa.1	1.06096e-19	1.39858	0.857	0.782	2.68094e-15	1	grapa
fhl3a	1.10402e-19	0.882252	1	0.993	2.78975e-15	1	fhl3a
hspa1b.1	1.12579e-19	2.37214	0.551	0.368	2.84475e-15	1	hspa1b
sox18	1.49491e-19	0.62836	1	1	3.77749e-15	1	sox18
tspan5a.1	1.64989e-19	1.71281	0.658	0.474	4.1691e-15	1	tspan5a
mcamb.1	1.72802e-19	0.701865	0.998	1	4.36653e-15	1	mcamb
hbegfa.1	1.79667e-19	1.21894	0.853	0.792	4.54001e-15	1	hbegfa
cerkl.1	1.93297e-19	1.7016	0.485	0.285	4.88443e-15	1	cerkl
prkceb.1	2.69876e-19	1.77497	0.689	0.518	6.81949e-15	1	prkceb
jam2a	2.82638e-19	0.630973	1	0.998	7.14197e-15	1	jam2a
klf6a.1	3.27549e-19	0.838033	0.995	0.983	8.27684e-15	1	klf6a
ltbp1.1	4.02527e-19	1.38521	0.872	0.789	1.01714e-14	1	ltbp1
fam53b.1	4.727e-19	0.912615	0.967	0.941	1.19447e-14	1	fam53b
appa.1	5.06838e-19	1.07019	0.993	0.972	1.28073e-14	1	appa
sh3bp4.1	5.81711e-19	1.25101	0.784	0.632	1.46993e-14	1	sh3bp4
rflnb.1	7.0546e-19	1.28587	0.679	0.478	1.78263e-14	1	rflnb
exoc6b.1	7.06226e-19	1.29004	0.895	0.824	1.78456e-14	1	exoc6b
robo3.1	8.8056e-19	1.64745	0.8	0.65	2.22509e-14	1	robo3
col4a2.1	9.53533e-19	1.34705	0.765	0.604	2.40948e-14	1	col4a2
foxl2b	1.3831e-18	0.556663	0.917	0.8	3.49495e-14	1	foxl2b
b3gnt2b.1	1.43621e-18	1.13681	0.684	0.478	3.62916e-14	1	b3gnt2b
il6r.1	1.48722e-18	1.58024	0.71	0.539	3.75806e-14	1	il6r
lamb1a.1	1.83665e-18	1.10957	0.983	0.968	4.64102e-14	1	lamb1a
ldha.1	1.94532e-18	1.79361	0.876	0.799	4.91562e-14	1	ldha
dlc.1	2.09451e-18	1.03282	0.981	0.96	5.29261e-14	1	dlc
map7d1b.1	2.10368e-18	1.00563	0.952	0.88	5.31579e-14	1	map7d1b
kcnj2a.1	2.50094e-18	2.28853	0.591	0.434	6.31962e-14	1	kcnj2a
slc46a2.1	2.58053e-18	3.7438	0.204	0.063	6.52074e-14	1	slc46a2
CABZ01118575.1.1	3.22217e-18	1.75161	0.542	0.355	8.14211e-14	1	CABZ01118575.1
zfpm2b.1	3.89234e-18	1.28508	0.689	0.494	9.83554e-14	1	zfpm2b
myh10.1	5.50742e-18	0.984388	0.986	0.966	1.39167e-13	1	myh10
si:ch211-285f17.1.1	5.64311e-18	1.07411	0.886	0.806	1.42596e-13	1	si:ch211-285f17.1
usp54a.1	6.54913e-18	0.963767	0.922	0.817	1.6549e-13	1	usp54a
rhocb.1	6.56955e-18	0.533764	1	1	1.66006e-13	1	rhocb
FQ311908.1.1	8.61141e-18	1.3628	0.504	0.301	2.17602e-13	1	FQ311908.1
cmtm6.1	9.55359e-18	1.21671	0.905	0.839	2.4141e-13	1	cmtm6
akap13.1	9.7723e-18	1.21258	0.881	0.78	2.46936e-13	1	akap13
lrrc8ab.1	1.68686e-17	1.03894	0.736	0.554	4.26253e-13	1	lrrc8ab
CABZ01088025.1.1	1.71263e-17	1.87767	0.477	0.293	4.32765e-13	1	CABZ01088025.1
ca16b.1	1.74105e-17	2.18628	0.487	0.302	4.39947e-13	1	ca16b
slc3a2a	2.53302e-17	1.55641	0.865	0.826	6.4007e-13	1	slc3a2a
tmem204	4.03509e-17	1.01102	0.91	0.875	1.01963e-12	1	tmem204
spred2b.1	4.38698e-17	1.22675	0.803	0.679	1.10854e-12	1	spred2b
aldocb	4.39697e-17	2.14296	0.713	0.548	1.11107e-12	1	aldocb
slc2a1b.1	6.65283e-17	4.63563	0.39	0.219	1.6811e-12	1	slc2a1b
dgkza.1	7.57527e-17	1.13727	0.895	0.776	1.9142e-12	1	dgkza
hpca.1	9.27402e-17	1.02887	0.952	0.924	2.34345e-12	1	hpca
fam89b.1	1.04936e-16	0.889556	0.867	0.782	2.65163e-12	1	fam89b
tspan7.1	1.24075e-16	0.817716	0.981	0.968	3.13524e-12	1	tspan7
slc2a1a.1	1.29362e-16	5.3197	0.285	0.127	3.26884e-12	1	slc2a1a
si:dkey-28e7.3.1	1.37099e-16	1.63193	0.594	0.42	3.46435e-12	1	si:dkey-28e7.3
six3a.1	1.53175e-16	2.41417	0.539	0.355	3.87058e-12	1	six3a
plekha1b.1	1.54383e-16	1.15641	0.644	0.46	3.9011e-12	1	plekha1b
rhbdf1a	2.09341e-16	0.862111	0.976	0.949	5.28984e-12	1	rhbdf1a
dysf.1	2.38303e-16	0.941529	0.841	0.718	6.02168e-12	1	dysf
dbn1.1	3.12436e-16	1.16999	0.753	0.615	7.89494e-12	1	dbn1
mgll.1	3.8529e-16	4.14109	0.323	0.161	9.7359e-12	1	mgll
cfl1l.1	9.6099e-16	1.26934	0.67	0.526	2.42833e-11	1	cfl1l
ablim1a	1.1876e-15	1.44301	0.58	0.405	3.00094e-11	1	ablim1a
kita.1	1.46355e-15	2.05867	0.449	0.269	3.69826e-11	1	kita
mapkbp1.1	1.5716e-15	1.85081	0.511	0.335	3.97127e-11	1	mapkbp1
si:ch211-191i18.2.1	2.52029e-15	1.13051	0.701	0.59	6.36852e-11	1	si:ch211-191i18.2
arpc1b	2.79198e-15	0.87547	0.938	0.907	7.05504e-11	1	arpc1b
adam10a.1	2.91251e-15	0.742916	0.998	0.995	7.35963e-11	1	adam10a
si:dkey-206p8.1.1	2.95655e-15	7.28655	0.09	0.012	7.4709e-11	1	si:dkey-206p8.1
shroom4.1	3.2628e-15	1.0728	0.926	0.879	8.24478e-11	1	shroom4
mef2d.1	3.97764e-15	1.12217	0.827	0.706	1.00511e-10	1	mef2d
znf366.1	4.27924e-15	1.24844	0.61	0.425	1.08132e-10	1	znf366
atp11c.1	7.41395e-15	1.19606	0.779	0.655	1.87343e-10	1	atp11c
eppk1.1	7.79631e-15	0.783056	0.848	0.711	1.97005e-10	1	eppk1
hip1.1	9.72169e-15	0.693808	0.967	0.926	2.45657e-10	1	hip1
si:dkey-23a13.2.1	1.16992e-14	4.35075	0.304	0.152	2.95628e-10	1	si:dkey-23a13.2
BX649448.4.1	1.21764e-14	2.98812	0.112	0.022	3.07685e-10	1	BX649448.4
cpm.1	1.26703e-14	1.80541	0.57	0.424	3.20166e-10	1	cpm
pkig.1	1.33104e-14	1.74778	0.499	0.332	3.3634e-10	1	pkig
rps6ka3a	1.52646e-14	0.884805	0.948	0.866	3.8572e-10	1	rps6ka3a
ap1s3b	1.597e-14	0.815743	0.917	0.839	4.03545e-10	1	ap1s3b
hspa12a.1	1.60283e-14	0.862797	0.96	0.923	4.05018e-10	1	hspa12a
sgk1	1.86872e-14	1.34671	1	0.998	4.72207e-10	1	sgk1
lpar6a	1.93685e-14	0.815448	0.969	0.91	4.89423e-10	1	lpar6a
id1.1	2.04572e-14	0.598643	1	1	5.16933e-10	1	id1
ramp2.1	2.26616e-14	0.366105	1	1	5.72637e-10	1	ramp2
sgpl1.1	2.53732e-14	1.11965	0.886	0.821	6.41156e-10	1	sgpl1
cdkn1bb.1	2.77171e-14	1.04627	0.917	0.846	7.00384e-10	1	cdkn1bb
myo1b.1	2.91177e-14	0.884842	0.85	0.742	7.35775e-10	1	myo1b
egfra	3.00018e-14	1.49945	0.568	0.403	7.58116e-10	1	egfra
mrc2	3.10093e-14	1.16382	0.641	0.487	7.83573e-10	1	mrc2
ier5l.1	3.22202e-14	0.91244	0.976	0.956	8.14173e-10	1	ier5l
slc7a3a.1	3.3554e-14	2.06694	0.663	0.558	8.47876e-10	1	slc7a3a
plat.1	3.70203e-14	3.3338	0.33	0.183	9.35465e-10	1	plat
tpm3.1	4.74018e-14	0.436344	1	1	1.1978e-09	1	tpm3
dock6.1	5.62547e-14	0.755977	0.943	0.901	1.4215e-09	1	dock6
cers2a.1	6.27694e-14	0.872663	0.955	0.918	1.58612e-09	1	cers2a
cdipt.1	6.57901e-14	0.783333	0.914	0.868	1.66245e-09	1	cdipt
slc44a2.1	6.61517e-14	0.880207	0.993	0.976	1.67159e-09	1	slc44a2
lrrfip1a.1	6.8549e-14	0.777375	0.96	0.926	1.73216e-09	1	lrrfip1a
mef2aa.1	7.50729e-14	0.80931	0.957	0.915	1.89702e-09	1	mef2aa
adgrl4.1	9.3815e-14	0.630719	0.998	0.993	2.37061e-09	1	adgrl4
ppp1r1c.1	9.6584e-14	2.73148	0.359	0.203	2.44058e-09	1	ppp1r1c
abcc2.1	1.13881e-13	1.53218	0.591	0.434	2.87766e-09	1	abcc2
anxa13.1	1.21324e-13	0.64539	0.995	0.989	3.06573e-09	1	anxa13
il13ra1	1.29126e-13	0.940467	0.941	0.912	3.26288e-09	1	il13ra1
mcf2l2	1.40141e-13	1.22473	0.817	0.723	3.54123e-09	1	mcf2l2
cdc42ep5.1	1.46703e-13	0.757858	0.976	0.949	3.70703e-09	1	cdc42ep5
si:cabz01074946.1.1	1.60942e-13	4.31173	0.195	0.074	4.06684e-09	1	si:cabz01074946.1
gstp1.1	1.76382e-13	1.17826	0.986	0.964	4.45699e-09	1	gstp1
caskin1.1	1.85108e-13	1.51791	0.724	0.594	4.67749e-09	1	caskin1
afap1l2.1	1.86363e-13	2.08137	0.361	0.203	4.70921e-09	1	afap1l2
tpd52l1.1	2.11277e-13	1.03143	0.936	0.868	5.33876e-09	1	tpd52l1
dgkh.1	2.39855e-13	1.32305	0.577	0.407	6.06091e-09	1	dgkh
prdx5.1	2.48856e-13	0.628619	0.945	0.898	6.28834e-09	1	prdx5
plk2b	2.61795e-13	0.448587	1	1	6.61529e-09	1	plk2b
adap2.1	3.99228e-13	1.67444	0.447	0.296	1.00881e-08	1	adap2
eno1a.1	4.11719e-13	1.80225	0.765	0.674	1.04037e-08	1	eno1a
pip5k1bb	4.84601e-13	1.89798	0.485	0.327	1.22454e-08	1	pip5k1bb
slc38a5b.1	4.9581e-13	1.18738	0.922	0.887	1.25286e-08	1	slc38a5b
kitlga.1	5.0171e-13	1.47782	0.537	0.38	1.26777e-08	1	kitlga
mef2cb	5.02987e-13	0.817278	0.993	0.979	1.271e-08	1	mef2cb
axin2.1	5.23272e-13	1.38382	0.722	0.616	1.32226e-08	1	axin2
nck1b.1	5.35663e-13	0.535172	0.995	0.985	1.35357e-08	1	nck1b
gnb1b.1	5.57613e-13	0.401493	1	1	1.40903e-08	1	gnb1b
fkbp1ab.1	5.60363e-13	1.81495	0.413	0.257	1.41598e-08	1	fkbp1ab
smpd2b.1	5.98356e-13	1.26901	0.615	0.465	1.51198e-08	1	smpd2b
psd2.1	6.77587e-13	0.898014	0.698	0.547	1.71219e-08	1	psd2
rgs3b.1	8.0649e-13	1.14721	0.724	0.592	2.03792e-08	1	rgs3b
tbc1d14.1	8.18742e-13	3.02001	0.285	0.144	2.06888e-08	1	tbc1d14
gdpd5a.1	9.69458e-13	1.50636	0.743	0.663	2.44972e-08	1	gdpd5a
znf516.1	1.01636e-12	1.1515	0.667	0.518	2.56823e-08	1	znf516
hdac5.1	1.07559e-12	1.21851	0.606	0.445	2.71791e-08	1	hdac5
bin1b.1	1.10001e-12	1.11482	0.72	0.61	2.7796e-08	1	bin1b
si:ch211-288d18.1.1	1.14568e-12	2.62263	0.382	0.237	2.89501e-08	1	si:ch211-288d18.1
tnfaip8l1.1	1.26614e-12	1.12722	0.912	0.87	3.19942e-08	1	tnfaip8l1
fzd10.1	1.33485e-12	2.1448	0.335	0.19	3.37303e-08	1	fzd10
qkia.1	1.52117e-12	0.320877	1	1	3.84384e-08	1	qkia
she.1	1.63517e-12	0.703997	0.926	0.853	4.13192e-08	1	she
sh3kbp1.1	1.66439e-12	0.788937	0.976	0.956	4.20576e-08	1	sh3kbp1
cav2.1	1.68147e-12	1.39553	0.53	0.372	4.24892e-08	1	cav2
acvrl1	1.76637e-12	0.783769	0.945	0.899	4.46343e-08	1	acvrl1
apbb2b.1	1.98416e-12	0.801002	0.872	0.833	5.01377e-08	1	apbb2b
micall2a	2.00644e-12	0.613656	0.993	0.988	5.07008e-08	1	micall2a
galnt1.1	2.01017e-12	0.763611	0.986	0.957	5.07949e-08	1	galnt1
tmem50a	2.2166e-12	0.563325	0.99	0.971	5.60113e-08	1	tmem50a
NAV1.1	2.25898e-12	1.10832	0.658	0.505	5.70822e-08	1	NAV1
tirap.1	2.33038e-12	2.3797	0.152	0.05	5.88864e-08	1	tirap
tnfrsfa.1	2.53863e-12	0.738948	0.955	0.907	6.41486e-08	1	tnfrsfa
arhgef7b	2.61709e-12	0.798648	0.976	0.958	6.61312e-08	1	arhgef7b
actb2	2.62612e-12	0.228717	1	1	6.63595e-08	1	actb2
draxin.1	2.80584e-12	1.17411	0.428	0.265	7.09007e-08	1	draxin
plecb.1	3.07463e-12	0.561068	1	0.995	7.76928e-08	1	plecb
ahi1.1	3.13475e-12	0.96126	0.675	0.537	7.92121e-08	1	ahi1
cdc42se1.1	3.39477e-12	0.785087	0.867	0.76	8.57825e-08	1	cdc42se1
bambia.1	3.52047e-12	1.64634	0.884	0.818	8.89589e-08	1	bambia
pgfb	3.53205e-12	1.94419	0.475	0.328	8.92515e-08	1	pgfb
abhd2a.1	3.80156e-12	1.08737	0.857	0.752	9.60617e-08	1	abhd2a
agap1.1	3.80972e-12	1.18317	0.789	0.701	9.62677e-08	1	agap1
akap12b.1	4.11417e-12	0.45399	1	0.998	1.03961e-07	1	akap12b
rap1b.1	4.34475e-12	0.481642	1	1	1.09788e-07	1	rap1b
arhgap29a	5.10087e-12	0.909562	0.815	0.718	1.28894e-07	1	arhgap29a
ets2	6.18174e-12	0.346783	0.91	0.84	1.56206e-07	1	ets2
ankrd50l.1	6.22767e-12	1.11411	0.724	0.593	1.57367e-07	1	ankrd50l
BX664622.1	6.30856e-12	1.11002	0.618	0.478	1.59411e-07	1	BX664622.1
mmp14b	6.6016e-12	0.732772	1	0.998	1.66816e-07	1	mmp14b
tmem47.1	6.63777e-12	1.6895	0.561	0.445	1.6773e-07	1	tmem47
skib.1	6.74151e-12	1.09679	0.803	0.683	1.70351e-07	1	skib
rock2b.1	6.87198e-12	0.738193	0.822	0.729	1.73648e-07	1	rock2b
arhgap18.1	7.46619e-12	1.31729	0.815	0.748	1.88663e-07	1	arhgap18
ak1	8.73379e-12	0.756645	0.884	0.795	2.20694e-07	1	ak1
ucp2.1	9.474e-12	0.565513	0.995	0.993	2.39398e-07	1	ucp2
cpeb4b.1	9.99182e-12	0.820258	0.703	0.583	2.52483e-07	1	cpeb4b
sesn1.1	1.03722e-11	0.69123	0.945	0.897	2.62096e-07	1	sesn1
cgnl1.1	1.07344e-11	0.612031	0.998	0.991	2.71248e-07	1	cgnl1
tjp1a.1	1.11236e-11	0.589777	1	0.972	2.81081e-07	1	tjp1a
mpp7a.1	1.13287e-11	1.88067	0.411	0.253	2.86265e-07	1	mpp7a
slc9a3r1b.1	1.15255e-11	0.672673	0.941	0.921	2.91237e-07	1	slc9a3r1b
myt1b	1.21427e-11	3.70346	0.214	0.096	3.06834e-07	1	myt1b
hnmt	1.31596e-11	1.76533	0.314	0.172	3.32531e-07	1	hnmt
lipeb.1	1.39424e-11	1.00383	0.679	0.532	3.52309e-07	1	lipeb
rtn3.1	1.58878e-11	0.630168	0.848	0.753	4.0147e-07	1	rtn3
magi1b.1	1.60329e-11	1.14951	0.824	0.769	4.05136e-07	1	magi1b
slc12a2.1	1.7019e-11	0.820601	0.903	0.818	4.30054e-07	1	slc12a2
rab6a.1	1.76634e-11	1.49531	0.848	0.806	4.46336e-07	1	rab6a
fam43a.1	1.95754e-11	0.712744	0.99	0.972	4.9465e-07	1	fam43a
abcb11a	2.14733e-11	3.41494	0.173	0.067	5.42609e-07	1	abcb11a
myo18ab.1	2.15564e-11	0.982215	0.789	0.674	5.44708e-07	1	myo18ab
CU459056.1.1	2.43878e-11	1.1315	0.929	0.873	6.16254e-07	1	CU459056.1
vamp2	2.45104e-11	2.69157	0.254	0.13	6.19354e-07	1	vamp2
spock3.1	2.6132e-11	0.453948	0.998	0.984	6.60331e-07	1	spock3
ptp4a3a.1	2.98545e-11	0.728842	0.941	0.922	7.54393e-07	1	ptp4a3a
zic2b.1	3.26055e-11	1.14994	0.696	0.574	8.23908e-07	1	zic2b
svila	3.95103e-11	0.835088	0.857	0.791	9.98386e-07	1	svila
si:dkey-56m19.5.1	4.0258e-11	0.805831	0.998	0.992	1.01728e-06	1	si:dkey-56m19.5
rasip1	4.85001e-11	0.421597	1	1	1.22555e-06	1	rasip1
hapln3.1	4.89628e-11	0.637579	0.988	0.984	1.23724e-06	1	hapln3
cited1	4.90998e-11	1.22552	0.765	0.644	1.2407e-06	1	cited1
nedd4l.1	4.94115e-11	0.978419	0.817	0.763	1.24858e-06	1	nedd4l
rasal2.1	5.0374e-11	0.842402	0.779	0.684	1.2729e-06	1	rasal2
tmem178b.1	6.00127e-11	3.86028	0.28	0.154	1.51646e-06	1	tmem178b
ralgapa1.1	6.42926e-11	0.720864	0.917	0.86	1.62461e-06	1	ralgapa1
vdac3	6.52977e-11	0.46308	1	0.998	1.65001e-06	1	vdac3
mtss1la.1	6.56466e-11	0.940107	0.774	0.645	1.65882e-06	1	mtss1la
zgc:113363.1	6.82643e-11	0.616782	0.91	0.823	1.72497e-06	1	zgc:113363
fam135a.1	7.95679e-11	1.19588	0.691	0.564	2.0106e-06	1	fam135a
ebf1b	8.66302e-11	1.84294	0.447	0.306	2.18906e-06	1	ebf1b
trib3.1	9.25855e-11	0.726845	0.9	0.835	2.33954e-06	1	trib3
parp12b.1	9.72447e-11	0.88611	0.708	0.566	2.45728e-06	1	parp12b
etv4.1	9.76319e-11	1.93854	0.589	0.478	2.46706e-06	1	etv4
fkbp1aa.1	1.0037e-10	0.301511	1	1	2.53626e-06	1	fkbp1aa
CR385050.1	1.11444e-10	0.826591	0.608	0.458	2.81609e-06	1	CR385050.1
xkrx	1.16904e-10	0.74158	0.803	0.699	2.95404e-06	1	xkrx
myo9ab.1	1.20235e-10	1.19537	0.513	0.362	3.03823e-06	1	myo9ab
lpl.1	1.20851e-10	1.57077	0.736	0.647	3.05379e-06	1	lpl
arhgef3.1	1.43421e-10	1.63202	0.511	0.388	3.6241e-06	1	arhgef3
gata2a	1.43652e-10	0.79828	0.919	0.883	3.62994e-06	1	gata2a
coro2ba.1	1.47435e-10	1.23767	0.672	0.556	3.72553e-06	1	coro2ba
mef2ca.1	1.47892e-10	0.872388	0.758	0.645	3.73708e-06	1	mef2ca
epha2a.1	1.58279e-10	0.853481	0.941	0.91	3.99956e-06	1	epha2a
nectin3b.1	1.69931e-10	1.61677	0.57	0.424	4.29399e-06	1	nectin3b
st3gal4.1	1.76584e-10	1.3456	0.413	0.283	4.46209e-06	1	st3gal4
tubb5.1	1.83068e-10	0.838183	0.988	0.976	4.62595e-06	1	tubb5
stox1	2.03107e-10	0.678163	0.857	0.756	5.13231e-06	1	stox1
CABZ01064472.1	2.08724e-10	3.63976	0.264	0.143	5.27424e-06	1	CABZ01064472.1
txndc12	2.09439e-10	0.526668	0.995	0.975	5.29232e-06	1	txndc12
dtx2	2.12138e-10	0.666422	0.898	0.812	5.36052e-06	1	dtx2
trim35-31.1	2.20063e-10	2.40056	0.221	0.106	5.56077e-06	1	trim35-31
prr5a.1	2.40562e-10	2.17326	0.264	0.137	6.07876e-06	1	prr5a
chka	2.4197e-10	1.37941	0.568	0.44	6.11434e-06	1	chka
slc5a8l.1	2.47367e-10	4.32901	0.062	0.009	6.25072e-06	1	slc5a8l
afap1.1	3.49258e-10	1.83543	0.489	0.372	8.8254e-06	1	afap1
plekha8.1	3.49604e-10	1.08108	0.603	0.497	8.83414e-06	1	plekha8
fkbp14.1	3.58016e-10	0.822869	0.853	0.779	9.04672e-06	1	fkbp14
si:ch211-238g23.1.1	4.12443e-10	3.92134	0.097	0.026	1.0422e-05	1	si:ch211-238g23.1
gpr156.1	4.12621e-10	0.951405	0.86	0.792	1.04265e-05	1	gpr156
pkma	4.27764e-10	0.951381	0.941	0.888	1.08092e-05	1	pkma
F2RL2.1	4.58564e-10	1.0549	0.43	0.285	1.15875e-05	1	F2RL2
egln2	5.12181e-10	0.982875	0.72	0.594	1.29423e-05	1	egln2
rhbdl2.1	5.12474e-10	0.909253	0.855	0.791	1.29497e-05	1	rhbdl2
oaz2b.1	5.57184e-10	2.10526	0.316	0.189	1.40795e-05	1	oaz2b
emc3.1	5.81229e-10	0.536534	0.952	0.897	1.46871e-05	1	emc3
tle3a.1	5.91494e-10	1.14326	0.72	0.623	1.49465e-05	1	tle3a
cx43	6.41051e-10	0.782149	1	1	1.61987e-05	1	cx43
avpr1ab	6.56674e-10	0.90261	0.724	0.643	1.65935e-05	1	avpr1ab
kif26ab.1	6.6647e-10	0.984507	0.589	0.483	1.6841e-05	1	kif26ab
abtb2b.1	7.6081e-10	0.62649	0.881	0.83	1.92249e-05	1	abtb2b
git1.1	7.75931e-10	1.09383	0.829	0.756	1.9607e-05	1	git1
fam83hb.1	8.26032e-10	0.658119	0.952	0.919	2.0873e-05	1	fam83hb
emc4.1	8.77474e-10	0.74554	0.641	0.497	2.21729e-05	1	emc4
tpi1b	9.21093e-10	0.703528	0.941	0.913	2.32751e-05	1	tpi1b
iqsec2a	9.40426e-10	1.0645	0.705	0.579	2.37636e-05	1	iqsec2a
phactr4b	1.09948e-09	0.53125	0.881	0.741	2.77828e-05	1	phactr4b
ccm2l	1.12618e-09	0.652852	0.903	0.837	2.84575e-05	1	ccm2l
mprip	1.16379e-09	0.70701	0.879	0.811	2.94079e-05	1	mprip
rgl2.1	1.22088e-09	0.903944	0.741	0.636	3.08504e-05	1	rgl2
nectin1b.1	1.24424e-09	0.964616	0.534	0.401	3.14407e-05	1	nectin1b
DGKD.1	1.29588e-09	1.89196	0.349	0.223	3.27457e-05	1	DGKD
rapgef2.1	1.33094e-09	1.18632	0.829	0.719	3.36315e-05	1	rapgef2
ralyl	1.35379e-09	4.79126	0.159	0.068	3.4209e-05	1	ralyl
si:rp71-1h20.9.1	1.5585e-09	2.90609	0.157	0.064	3.93817e-05	1	si:rp71-1h20.9
map3k1	1.56224e-09	0.464245	0.99	0.986	3.94762e-05	1	map3k1
marveld1.1	1.59112e-09	0.370667	0.988	0.98	4.02059e-05	1	marveld1
tcf7l1b.1	1.73505e-09	0.803035	0.867	0.803	4.38429e-05	1	tcf7l1b
adgrb1a.1	1.846e-09	2.33217	0.245	0.126	4.66467e-05	1	adgrb1a
npdc1b.1	1.89698e-09	3.03174	0.185	0.085	4.79347e-05	1	npdc1b
CABZ01053976.1	1.95217e-09	0.729549	0.601	0.456	4.93294e-05	1	CABZ01053976.1
BX284638.2.1	2.08174e-09	0.717898	0.931	0.884	5.26035e-05	1	BX284638.2
pxdc1b.1	2.20643e-09	0.682354	0.777	0.661	5.57542e-05	1	pxdc1b
ubac1.1	2.26175e-09	1.84739	0.375	0.251	5.71521e-05	1	ubac1
si:ch211-269k10.2	2.31771e-09	0.739775	0.729	0.637	5.85661e-05	1	si:ch211-269k10.2
pcdh12	2.3635e-09	0.541848	1	0.989	5.97233e-05	1	pcdh12
zdhhc20a	2.43905e-09	1.30119	0.428	0.293	6.16324e-05	1	zdhhc20a
dachc.1	2.60111e-09	3.89421	0.238	0.129	6.57274e-05	1	dachc
ankrd1a.1	2.62388e-09	2.75011	0.069	0.014	6.63028e-05	1	ankrd1a
rnf220a	2.64375e-09	0.507248	0.306	0.172	6.68049e-05	1	rnf220a
PIEZO2	2.73553e-09	4.3778	0.076	0.017	6.91242e-05	1	PIEZO2
ppp1r9alb	2.75186e-09	1.29187	0.625	0.519	6.95367e-05	1	ppp1r9alb
ripor1	2.77034e-09	0.624908	0.974	0.954	7.00038e-05	1	ripor1
tln1.1	3.00549e-09	0.594299	0.971	0.969	7.59457e-05	1	tln1
uck2a.1	3.17965e-09	0.955118	0.741	0.651	8.03467e-05	1	uck2a
trim35-10.1	3.41624e-09	1.34521	0.245	0.127	8.63249e-05	1	trim35-10
si:dkey-23k10.5.1	3.45732e-09	1.07556	0.24	0.126	8.73629e-05	1	si:dkey-23k10.5
tagln2	3.51412e-09	0.231534	1	1	8.87983e-05	1	tagln2
igsf5b.1	3.66382e-09	2.65654	0.121	0.042	9.2581e-05	1	igsf5b
amotl2a.1	3.70363e-09	0.632108	1	0.997	9.35871e-05	1	amotl2a
plxnb3	3.85027e-09	0.753959	0.838	0.738	9.72926e-05	1	plxnb3
si:ch73-335l21.4.1	3.94809e-09	1.25152	0.819	0.759	9.97643e-05	1	si:ch73-335l21.4
sema7a.1	4.1428e-09	1.27629	0.411	0.277	0.000104684	1	sema7a
trib1	4.2024e-09	1.42624	0.128	0.046	0.00010619	1	trib1
celf3a.1	4.28743e-09	3.2854	0.185	0.086	0.000108339	1	celf3a
keap1a	4.57193e-09	0.710716	0.789	0.712	0.000115528	1	keap1a
klhl17.1	4.63e-09	1.30988	0.314	0.186	0.000116996	1	klhl17
efna1b.1	4.67752e-09	0.511995	0.99	0.972	0.000118196	1	efna1b
chrnb2.1	4.89493e-09	0.940728	0.316	0.183	0.00012369	1	chrnb2
eepd1	4.90953e-09	1.80746	0.432	0.312	0.000124059	1	eepd1
man1b1b	5.17583e-09	1.19451	0.663	0.572	0.000130788	1	man1b1b
serinc5	5.39855e-09	0.572111	0.99	0.973	0.000136416	1	serinc5
arfip2a	5.72527e-09	1.42898	0.276	0.154	0.000144672	1	arfip2a
pik3r5	6.29097e-09	1.21945	0.667	0.576	0.000158966	1	pik3r5
MAGI3.1	6.32458e-09	0.883469	0.656	0.509	0.000159816	1	MAGI3
arhgef1a	6.83927e-09	0.667671	0.986	0.948	0.000172822	1	arhgef1a
sox4a.1	7.26406e-09	0.425246	0.993	0.981	0.000183555	1	sox4a
id3	7.55851e-09	0.778795	0.96	0.949	0.000190996	1	id3
gsk3ba.1	7.87218e-09	0.938704	0.608	0.479	0.000198922	1	gsk3ba
sptbn1.1	8.15622e-09	0.702954	0.95	0.934	0.0002061	1	sptbn1
kcnn1a.1	8.457e-09	1.40729	0.401	0.256	0.0002137	1	kcnn1a
SHC3	8.74878e-09	2.11943	0.216	0.113	0.000221073	1	SHC3
arf5.1	1.03986e-08	0.566609	0.974	0.973	0.000262763	1	arf5
tbx21.1	1.06547e-08	2.52582	0.057	0.01	0.000269234	1	tbx21
fgd5b.1	1.08611e-08	1.24085	0.515	0.395	0.00027445	1	fgd5b
fam98a.1	1.09747e-08	1.1072	0.214	0.107	0.000277321	1	fam98a
rhoj.1	1.14047e-08	1.30155	0.428	0.289	0.000288186	1	rhoj
efnb1.1	1.15266e-08	0.924857	0.418	0.275	0.000291267	1	efnb1
col5a3a.1	1.16107e-08	3.60977	0.138	0.055	0.00029339	1	col5a3a
adora1b.1	1.20209e-08	3.22329	0.15	0.064	0.000303757	1	adora1b
rca2.2.1	1.20256e-08	1.01851	0.219	0.11	0.000303875	1	rca2.2
vat1l	1.20716e-08	6.87475	0.114	0.041	0.000305037	1	vat1l
prkd2	1.22301e-08	0.504842	0.874	0.783	0.000309042	1	prkd2
tnfrsf9a	1.26744e-08	5.26608	0.207	0.107	0.00032027	1	tnfrsf9a
myo1ca.1	1.30791e-08	1.20906	0.675	0.579	0.000330497	1	myo1ca
si:ch211-158d24.4	1.34949e-08	1.44105	0.34	0.218	0.000341001	1	si:ch211-158d24.4
si:ch211-199g17.9.1	1.39815e-08	0.57155	0.684	0.564	0.000353298	1	si:ch211-199g17.9
si:dkey-262k9.2.1	1.41526e-08	1.68541	0.192	0.093	0.000357622	1	si:dkey-262k9.2
gng2.1	1.41686e-08	0.628041	0.881	0.837	0.000358025	1	gng2
rhoub	1.42813e-08	1.32706	0.675	0.6	0.000360875	1	rhoub
niban1b.1	1.44017e-08	0.708904	0.943	0.918	0.000363916	1	niban1b
ldlrad4a	1.49852e-08	1.69851	0.58	0.5	0.000378662	1	ldlrad4a
rbms1b.1	1.53044e-08	0.536671	0.936	0.889	0.000386726	1	rbms1b
CABZ01044281.1	1.5683e-08	1.32105	0.242	0.13	0.000396293	1	CABZ01044281.1
prkag3a	1.60209e-08	2.13802	0.197	0.098	0.000404832	1	prkag3a
tmtc2a.1	1.69813e-08	0.97572	0.675	0.569	0.000429099	1	tmtc2a
kcnn4.1	1.73858e-08	2.18308	0.228	0.122	0.000439322	1	kcnn4
mrtfbb	1.90673e-08	0.728492	0.743	0.635	0.000481811	1	mrtfbb
rftn2.1	1.96145e-08	1.26607	0.805	0.757	0.000495639	1	rftn2
myl12.1	1.99115e-08	0.212227	1	1	0.000503145	1	myl12.1
arpc5a.1	2.09014e-08	0.486728	0.995	0.972	0.000528156	1	arpc5a
anxa5b.1	2.20329e-08	1.53859	0.558	0.455	0.00055675	1	anxa5b
lpin2.1	2.3568e-08	0.985094	0.551	0.419	0.000595539	1	lpin2
ccdc85ca	2.44775e-08	3.22357	0.147	0.064	0.000618523	1	ccdc85ca
ptk2aa.1	2.53798e-08	0.797574	0.81	0.718	0.000641323	1	ptk2aa
psda	2.7213e-08	0.719594	0.468	0.323	0.000687646	1	psda
foxq1b	2.72185e-08	4.74218	0.112	0.04	0.000687785	1	foxq1b
itsn2b	2.74843e-08	0.568888	0.824	0.721	0.000694501	1	itsn2b
esr1	2.80399e-08	1.20177	0.48	0.356	0.00070854	1	esr1
cadm1b	2.91863e-08	7.48226	0.062	0.013	0.000737508	1	cadm1b
bag2.1	3.53973e-08	0.957106	0.665	0.576	0.000894453	1	bag2
scarf1	3.57663e-08	0.416255	1	0.998	0.000903778	1	scarf1
ddx5	3.64233e-08	0.361461	1	1	0.00092038	1	ddx5
CR847906.1	3.72767e-08	1.03854	0.634	0.543	0.000941944	1	CR847906.1
macf1a	3.73878e-08	0.648105	0.912	0.866	0.000944752	1	macf1a
ptbp1a	3.78871e-08	0.549659	0.998	0.993	0.000957369	1	ptbp1a
mapk11	3.97415e-08	1.44686	0.48	0.37	0.00100423	1	mapk11
gpr146	4.02883e-08	1.04969	0.599	0.472	0.00101805	1	gpr146
slco5a1a	4.18836e-08	1.22095	0.653	0.566	0.00105836	1	slco5a1a
FQ976914.1	4.2691e-08	0.829449	0.846	0.808	0.00107876	1	FQ976914.1
prkcea	4.57876e-08	0.90336	0.691	0.579	0.00115701	1	prkcea
abracl	4.70609e-08	0.488976	0.967	0.959	0.00118918	1	abracl
arl15b.1	4.88382e-08	1.23223	0.58	0.469	0.00123409	1	arl15b
ptk2ab	5.21945e-08	0.232188	0.917	0.867	0.0013189	1	ptk2ab
si:dkey-204f11.64	5.44176e-08	1.17462	0.435	0.297	0.00137508	1	si:dkey-204f11.64
mfsd6a	5.57537e-08	3.56516	0.223	0.121	0.00140884	1	mfsd6a
sdf4.1	5.72953e-08	0.990947	0.767	0.686	0.00144779	1	sdf4
copz1	6.11019e-08	0.541325	0.96	0.943	0.00154398	1	copz1
fam3c.1	6.77884e-08	0.982678	0.743	0.662	0.00171295	1	fam3c
grb10a.1	7.18902e-08	0.772322	0.993	0.978	0.00181659	1	grb10a
capgb	7.56462e-08	0.651701	0.948	0.918	0.0019115	1	capgb
btbd11a	7.96491e-08	2.20269	0.266	0.162	0.00201265	1	btbd11a
arhgap31.1	8.17329e-08	0.584983	0.929	0.919	0.00206531	1	arhgap31
svopl	9.18882e-08	4.03361	0.071	0.019	0.00232192	1	svopl
mboat2a	9.1977e-08	0.474616	0.841	0.747	0.00232417	1	mboat2a
adcyap1b	9.53259e-08	3.9752	0.176	0.088	0.00240879	1	adcyap1b
znf710a.1	9.61656e-08	0.757131	0.72	0.619	0.00243001	1	znf710a
ostf1.1	9.87407e-08	1.52122	0.382	0.271	0.00249508	1	ostf1
cx39.4	1.11362e-07	1.08645	0.57	0.461	0.00281402	1	cx39.4
smad1	1.12243e-07	0.759662	0.964	0.945	0.00283626	1	smad1
rab14	1.12276e-07	0.780486	0.971	0.975	0.00283711	1	rab14
nxpe3	1.12503e-07	0.968815	0.658	0.561	0.00284284	1	nxpe3
kifap3a	1.12933e-07	0.554187	0.815	0.734	0.00285371	1	kifap3a
ackr3b.1	1.18478e-07	1.09189	0.746	0.697	0.00299382	1	ackr3b
rtn1b	1.23182e-07	2.69657	0.347	0.249	0.00311268	1	rtn1b
s1pr5a	1.23726e-07	0.652531	0.974	0.949	0.00312643	1	s1pr5a
cdc42bpaa.1	1.24809e-07	0.933032	0.634	0.539	0.0031538	1	cdc42bpaa
scinla.1	1.26566e-07	1.2898	0.594	0.498	0.00319819	1	scinla
tes.1	1.28239e-07	0.731792	0.962	0.933	0.00324047	1	tes
adra2da	1.29759e-07	3.45117	0.195	0.103	0.00327887	1	adra2da
kng1	1.34404e-07	4.31287	0.145	0.065	0.00339626	1	kng1
plk2a.1	1.35728e-07	0.484731	1	0.995	0.0034297	1	plk2a
cdc42	1.42101e-07	0.225378	1	1	0.00359074	1	cdc42
chd9	1.60619e-07	0.47527	0.532	0.396	0.00405867	1	chd9
rab11a.1	1.61284e-07	0.780175	0.912	0.863	0.00407548	1	rab11a
rasgef1ba.1	1.62105e-07	0.742371	0.705	0.636	0.00409623	1	rasgef1ba
qdpra	1.62942e-07	0.67116	0.47	0.36	0.00411738	1	qdpra
csnk1g1.1	1.63678e-07	1.09985	0.632	0.518	0.00413599	1	csnk1g1
pfdn1.1	1.64104e-07	0.824668	0.803	0.731	0.00414675	1	pfdn1
alpl.1	1.73841e-07	0.319326	0.941	0.858	0.00439278	1	alpl
kank1a.1	1.82039e-07	1.5603	0.425	0.311	0.00459995	1	kank1a
junbb	1.8296e-07	0.327615	0.998	1	0.00462322	1	junbb
stxbp2	1.9131e-07	0.73437	0.831	0.775	0.0048342	1	stxbp2
crtap.1	1.97951e-07	0.587235	0.938	0.901	0.00500201	1	crtap
rxrab.1	2.01593e-07	1.62204	0.176	0.086	0.00509406	1	rxrab
reep5.1	2.01761e-07	0.414638	0.995	0.99	0.00509829	1	reep5
cdc42l	2.0711e-07	0.301145	1	1	0.00523346	1	cdc42l
gng5.1	2.40811e-07	0.381242	0.995	0.993	0.00608505	1	gng5
pcdh1g3	2.44718e-07	1.27766	0.223	0.123	0.00618378	1	pcdh1g3
ptk2bb.1	2.64389e-07	0.476675	0.323	0.201	0.00668083	1	ptk2bb
apba1a	2.68387e-07	2.44801	0.219	0.122	0.00678187	1	apba1a
itsn2a	2.68755e-07	2.1442	0.259	0.156	0.00679117	1	itsn2a
rhogb	2.69557e-07	0.951261	0.781	0.714	0.00681143	1	rhogb
fam13a	2.70784e-07	1.06329	0.551	0.45	0.00684243	1	fam13a
chd4a.1	2.74415e-07	0.551203	0.919	0.874	0.00693419	1	chd4a
mapre1b.1	2.83963e-07	0.394232	0.998	0.996	0.00717545	1	mapre1b
mylipa	2.86865e-07	1.07385	0.691	0.599	0.00724878	1	mylipa
si:ch73-61d6.3	2.88064e-07	0.667198	0.836	0.775	0.00727909	1	si:ch73-61d6.3
tmem35.1	2.89462e-07	1.01843	0.466	0.346	0.00731442	1	tmem35
ARHGEF25	2.92593e-07	1.11097	0.442	0.319	0.00739352	1	ARHGEF25
myo6b.1	3.20664e-07	0.982145	0.679	0.58	0.00810287	1	myo6b
BX537291.1.1	3.21982e-07	1.30564	0.344	0.235	0.00813616	1	BX537291.1
ptpn4a	3.33438e-07	1.74421	0.466	0.362	0.00842565	1	ptpn4a
jund.1	3.35577e-07	0.924514	0.57	0.448	0.0084797	1	jund
slc9a6b	3.50639e-07	1.79502	0.361	0.249	0.00886031	1	slc9a6b
cab39l1.1	3.74109e-07	0.711329	0.793	0.727	0.00945335	1	cab39l1
si:ch211-165e15.1	3.87659e-07	1.17894	0.385	0.268	0.00979575	1	si:ch211-165e15.1
ktn1	4.10257e-07	0.936508	0.834	0.788	0.0103668	1	ktn1
mfhas1	4.13482e-07	0.646163	0.734	0.624	0.0104483	1	mfhas1
ift52.1	4.17075e-07	1.33908	0.551	0.444	0.0105391	1	ift52
sult2st3	4.2388e-07	0.840483	0.715	0.639	0.010711	1	sult2st3
mfng	4.28431e-07	0.449866	1	0.998	0.010826	1	mfng
mylk5.1	4.46884e-07	0.431765	0.99	0.977	0.0112923	1	mylk5
ptprga.1	4.48762e-07	0.686832	0.791	0.719	0.0113398	1	ptprga
rab2a	4.59296e-07	0.363851	0.998	0.987	0.0116059	1	rab2a
litaf	4.69802e-07	1.07896	0.373	0.259	0.0118714	1	litaf
il15.1	5.04428e-07	1.08969	0.399	0.288	0.0127464	1	il15
hipk3b	5.17542e-07	1.12501	0.442	0.323	0.0130778	1	hipk3b
PKN2.1	5.43414e-07	0.826161	0.886	0.851	0.0137315	1	PKN2
ano5b.1	5.47831e-07	0.792389	0.746	0.663	0.0138432	1	ano5b
ftr82.1	5.48426e-07	0.43361	0.993	0.971	0.0138582	1	ftr82
eva1ba.1	5.52713e-07	0.884387	0.846	0.797	0.0139665	1	eva1ba
samd4a	5.57487e-07	0.651064	0.577	0.461	0.0140871	1	samd4a
kif3ca.1	5.58789e-07	2.76614	0.245	0.153	0.01412	1	kif3ca
pcsk7	5.73438e-07	0.640531	0.722	0.614	0.0144902	1	pcsk7
igf1ra.1	6.00691e-07	1.55499	0.397	0.286	0.0151789	1	igf1ra
tns1b.1	6.0837e-07	0.655352	0.903	0.878	0.0153729	1	tns1b
sept6.1	6.09016e-07	0.310133	1	1	0.0153892	1	2024-09-06
insig1.1	6.29231e-07	0.946927	0.599	0.5	0.0159	1	insig1
RAMP3.1	6.33671e-07	1.85503	0.183	0.095	0.0160122	1	RAMP3
pxdn.1	6.58168e-07	0.747783	0.86	0.813	0.0166312	1	pxdn
kcnq2b.1	6.8275e-07	3.34442	0.1	0.038	0.0172524	1	kcnq2b
plpp1a.1	6.96399e-07	0.292846	0.938	0.88	0.0175973	1	plpp1a
aopep	7.04418e-07	0.934074	0.72	0.653	0.0178	1	aopep
hspb8.1	7.07613e-07	1.42262	0.349	0.236	0.0178807	1	hspb8
rpp25b	7.09244e-07	0.249323	0.964	0.959	0.0179219	1	rpp25b
kdm5ba	7.10361e-07	0.491016	0.779	0.663	0.0179501	1	kdm5ba
slc45a2	7.12517e-07	3.16808	0.107	0.042	0.0180046	1	slc45a2
si:ch211-102c2.4.1	7.1878e-07	0.855271	0.675	0.596	0.0181629	1	si:ch211-102c2.4
btg1.1	7.46674e-07	0.508171	0.988	0.993	0.0188677	1	btg1
gpia	7.57852e-07	0.828856	0.879	0.87	0.0191502	1	gpia
ccdc141.1	7.60905e-07	1.80252	0.211	0.121	0.0192273	1	ccdc141
hdac7a.1	7.63465e-07	0.74131	0.506	0.38	0.019292	1	hdac7a
P2RY14	7.74043e-07	3.35865	0.105	0.042	0.0195593	1	P2RY14
trnau1apb	7.92576e-07	0.460705	0.983	0.956	0.0200276	1	trnau1apb
plod1a	8.01937e-07	0.547001	0.912	0.895	0.0202641	1	plod1a
itga2.1.1	8.39132e-07	1.54901	0.169	0.085	0.021204	1	itga2.1
p4ha1b	8.41777e-07	1.99888	0.577	0.519	0.0212709	1	p4ha1b
mknk2a	8.52833e-07	0.663931	0.539	0.423	0.0215502	1	mknk2a
tmem51a	8.63668e-07	1.21634	0.613	0.528	0.021824	1	tmem51a
fbxl3l.1	9.19867e-07	3.84094	0.062	0.016	0.0232441	1	fbxl3l
limk1b	9.2269e-07	0.533433	0.829	0.744	0.0233155	1	limk1b
ccl38.1.1	9.5967e-07	2.2331	0.254	0.159	0.0242499	1	ccl38.1
efna1a.1	9.77657e-07	0.425478	0.955	0.933	0.0247044	1	efna1a
pnpla7a.1	9.79859e-07	0.852138	0.66	0.545	0.02476	1	pnpla7a
palm2akap2.1	9.81898e-07	1.00483	0.689	0.598	0.0248116	1	palm2akap2
sft2d1	1.05262e-06	0.448183	0.922	0.905	0.0265986	1	sft2d1
kif1b	1.05746e-06	1.05865	0.772	0.715	0.026721	1	kif1b
tfg	1.08391e-06	0.478877	0.998	0.993	0.0273894	1	tfg
PAQR9	1.09797e-06	0.793765	0.646	0.551	0.0277445	1	PAQR9
ical1.1	1.10777e-06	1.93492	0.252	0.157	0.0279923	1	ical1
aatka	1.15042e-06	0.948398	0.544	0.454	0.0290699	1	aatka
rnasekb	1.16876e-06	1.19573	0.546	0.459	0.0295335	1	rnasekb
trim3a	1.21734e-06	1.18597	0.461	0.337	0.030761	1	trim3a
sema5ba	1.23435e-06	2.72604	0.088	0.032	0.0311908	1	sema5ba
tpst1	1.25156e-06	0.547937	0.962	0.945	0.0316256	1	tpst1
cttn	1.28523e-06	0.649693	0.981	0.974	0.0324764	1	cttn
si:ch73-22o12.1.1	1.36566e-06	0.579028	0.869	0.824	0.0345089	1	si:ch73-22o12.1
si:dkey-250k10.4.1	1.39632e-06	1.47512	0.145	0.068	0.0352835	1	si:dkey-250k10.4
ppfibp1b.1	1.4228e-06	0.942838	0.717	0.667	0.0359528	1	ppfibp1b
shank3b.1	1.43201e-06	0.537545	0.943	0.91	0.0361854	1	shank3b
flncb	1.48174e-06	1.64131	0.373	0.274	0.0374421	1	flncb
fli1a.1	1.55612e-06	0.267706	1	1	0.0393216	1	fli1a
pcdh1g33	1.56141e-06	1.30388	0.076	0.024	0.0394552	1	pcdh1g33
sycp1	1.57092e-06	3.63747	0.102	0.042	0.0396957	1	sycp1
fbxl7.1	1.64269e-06	0.857643	0.789	0.738	0.0415091	1	fbxl7
lcmt2	1.65374e-06	2.1508	0.178	0.097	0.0417883	1	lcmt2
pitpnaa	1.67371e-06	0.439364	1	0.996	0.042293	1	pitpnaa
ecpas	1.73372e-06	0.997859	0.513	0.377	0.0438093	1	ecpas
tet3.1	1.86453e-06	0.918724	0.724	0.641	0.0471148	1	tet3
UBE2M	1.88498e-06	0.47342	0.943	0.899	0.0476315	1	UBE2M
adma	1.93714e-06	0.517691	0.841	0.758	0.0489497	1	adma
si:dkey-176f19.4	1.99061e-06	1.48048	0.114	0.048	0.0503007	1	si:dkey-176f19.4
ccdc187	2.01271e-06	0.451281	0.943	0.895	0.0508592	1	ccdc187
cfl1	2.07754e-06	0.266888	1	1	0.0524973	1	cfl1
pak2a.1	2.10047e-06	0.586126	0.952	0.925	0.0530769	1	pak2a
dusp5	2.12185e-06	0.292755	1	1	0.0536169	1	dusp5
dspa	2.14592e-06	1.01567	0.822	0.76	0.0542252	1	dspa
ttyh3b.1	2.15074e-06	1.30939	0.461	0.365	0.054347	1	ttyh3b
limch1b.1	2.16319e-06	0.491718	0.988	0.985	0.0546616	1	limch1b
si:ch211-212g7.6	2.18094e-06	0.688776	0.805	0.72	0.0551101	1	si:ch211-212g7.6
histh1l.1	2.21191e-06	0.381228	0.998	1	0.0558926	1	histh1l
npr3.1	2.26112e-06	1.50511	0.311	0.209	0.0571362	1	npr3
llgl1.1	2.28172e-06	1.10037	0.411	0.316	0.0576569	1	llgl1
tspan3a.1	2.33751e-06	0.613716	0.862	0.79	0.0590666	1	tspan3a
iqgap2	2.46406e-06	0.585959	0.971	0.959	0.0622644	1	iqgap2
si:ch211-264f5.8	2.46657e-06	1.38976	0.202	0.112	0.0623278	1	si:ch211-264f5.8
ywhaba.1	2.47277e-06	0.270078	1	1	0.0624844	1	ywhaba
si:ch211-180a12.2	2.5003e-06	1.90008	0.078	0.027	0.0631801	1	si:ch211-180a12.2
rhoab.1	2.51479e-06	0.436245	0.967	0.961	0.0635463	1	rhoab
s1pr2	2.5538e-06	1.15906	0.411	0.298	0.0645319	1	s1pr2
ext1a.1	2.75913e-06	0.809632	0.793	0.732	0.0697206	1	ext1a
six2a	2.86398e-06	0.669637	0.29	0.186	0.07237	1	six2a
reps2.1	2.90641e-06	0.552522	0.874	0.819	0.073442	1	reps2
grb2a.1	2.95578e-06	0.949805	0.679	0.612	0.0746896	1	grb2a
cplx2l	3.00289e-06	0.992591	0.121	0.054	0.0758801	1	cplx2l
wwtr1.1	3.0436e-06	0.55654	0.758	0.701	0.0769088	1	wwtr1
pcdh1g29	3.20567e-06	3.9716	0.048	0.011	0.0810041	1	pcdh1g29
etv5a.1	3.21476e-06	1.08399	0.634	0.551	0.0812337	1	etv5a
rundc3aa	3.2196e-06	3.60404	0.057	0.015	0.0813562	1	rundc3aa
ube2a	3.29679e-06	0.844505	0.893	0.857	0.0833066	1	ube2a
tbx2b.1	3.31874e-06	1.90493	0.385	0.283	0.0838613	1	tbx2b
erlec1.1	3.33116e-06	0.563904	0.834	0.774	0.0841752	1	erlec1
sh3bp4a.1	3.39699e-06	0.453699	0.853	0.788	0.0858385	1	sh3bp4a
selenot1a.1	3.50938e-06	0.51199	0.841	0.784	0.0886785	1	selenot1a
kdr	3.57893e-06	0.534781	0.979	0.971	0.0904359	1	kdr
rca2.1.1	3.58921e-06	0.657046	0.86	0.798	0.0906957	1	rca2.1
elocb.1	3.62142e-06	0.536006	0.86	0.837	0.0915098	1	elocb
smad5.1	3.71351e-06	0.324971	0.99	0.994	0.0938366	1	smad5
mrtfba	3.91719e-06	1.24282	0.458	0.356	0.0989835	1	mrtfba
cntn1a.2	4.40185e-86	3.19386	0.952	0.434	1.1123e-81	2	cntn1a
pclaf.2	3.78908e-83	3.19103	0.968	0.55	9.57463e-79	2	pclaf
zgc:110540.2	4.63733e-79	3.78067	0.887	0.355	1.17181e-74	2	zgc:110540
pcna.2	6.86588e-77	2.24115	1	1	1.73494e-72	2	pcna
mibp.2	8.52971e-77	3.25862	0.989	0.782	2.15537e-72	2	mibp
rrm1.2	1.17707e-67	2.31943	1	0.987	2.97433e-63	2	rrm1
asf1ba.2	1.09355e-63	3.04567	0.957	0.686	2.76328e-59	2	asf1ba
stmn1a.2	1.5507e-63	2.20379	0.989	0.834	3.91846e-59	2	stmn1a
hist1h4l:21.2	3.05965e-61	2.57643	0.941	0.544	7.73144e-57	2	hist1h4l:21
si:ch211-113a14.18.2	2.34061e-57	2.63694	0.817	0.335	5.9145e-53	2	si:ch211-113a14.18
si:ch211-113a14.24.2	1.67885e-56	2.55507	0.672	0.187	4.2423e-52	2	si:ch211-113a14.24
si:ch211-113a14.22:2.2	6.0381e-55	2.31534	0.597	0.137	1.52577e-50	2	si:ch211-113a14.22:2
rrm2:1.1	1.58817e-54	2.94631	0.892	0.523	4.01315e-50	2	rrm2:1
rrm2.2	2.72367e-53	2.9674	0.909	0.563	6.88244e-49	2	rrm2
tk1.2	7.59123e-50	3.17004	0.796	0.398	1.91823e-45	2	tk1
chaf1a.1	2.52872e-49	2.05498	0.984	0.865	6.38982e-45	2	chaf1a
smc2.2	4.35628e-49	2.17754	0.946	0.701	1.10079e-44	2	smc2
hist1h4l:8.2	5.36671e-49	2.02829	0.613	0.163	1.35611e-44	2	hist1h4l:8
bcl2l16.2	2.35121e-48	1.28369	1	0.923	5.94127e-44	2	bcl2l16
esco2.2	1.30172e-47	3.80168	0.833	0.518	3.28931e-43	2	esco2
CR354435.1.2	3.57305e-47	2.53407	0.608	0.176	9.02875e-43	2	CR354435.1
slc29a2.1	1.11693e-46	3.92811	0.747	0.346	2.82236e-42	2	slc29a2
h3f3b.1.2	3.70122e-45	1.0601	1	0.999	9.35262e-41	2	h3f3b.1
si:dkey-108k21.10.2	5.11621e-44	2.5677	0.737	0.322	1.29282e-39	2	si:dkey-108k21.10
ube2t.2	1.3142e-42	3.05922	0.608	0.206	3.32086e-38	2	ube2t
rpa2.2	2.42442e-42	2.01339	0.935	0.827	6.12627e-38	2	rpa2
fen1.2	5.19651e-42	1.8953	0.957	0.814	1.31311e-37	2	fen1
chaf1b.1	6.12807e-42	2.34211	0.866	0.535	1.5485e-37	2	chaf1b
hist1h4l:18.2	2.75116e-41	1.65957	0.64	0.202	6.95191e-37	2	hist1h4l:18
slbp	2.78851e-41	2.32964	0.93	0.773	7.04628e-37	2	slbp
rbbp4.1	2.81474e-41	1.53542	0.995	0.975	7.11256e-37	2	rbbp4
krcp.1	3.23191e-41	3.52528	0.715	0.345	8.16671e-37	2	krcp
rpa3.2	7.69731e-41	1.93155	0.892	0.557	1.94503e-36	2	rpa3
tyms.2	1.65328e-40	2.82555	0.758	0.377	4.17768e-36	2	tyms
sumo3b.2	7.79834e-40	1.48103	0.995	0.968	1.97056e-35	2	sumo3b
zgc:153405.2	1.01743e-39	2.49899	0.661	0.261	2.57094e-35	2	zgc:153405
e2f8.2	2.23196e-39	3.60278	0.747	0.405	5.63994e-35	2	e2f8
fbxo5.2	3.16782e-39	2.34578	0.828	0.513	8.00477e-35	2	fbxo5
hist1h4l:10.2	4.70706e-39	2.06067	0.538	0.15	1.18943e-34	2	hist1h4l:10
lig1.1	8.38144e-39	1.94562	0.946	0.793	2.11791e-34	2	lig1
dnajc9.1	1.68037e-38	2.03863	0.93	0.702	4.24612e-34	2	dnajc9
si:dkey-30c15.10.2	2.10653e-38	1.72472	0.973	0.836	5.323e-34	2	si:dkey-30c15.10
ccna2.2	1.5513e-37	1.82017	0.962	0.83	3.91998e-33	2	ccna2
smc4.2	2.97138e-37	1.87031	0.946	0.791	7.50838e-33	2	smc4
si:ch211-113a14.12.2	1.84517e-36	1.58233	0.866	0.492	4.66256e-32	2	si:ch211-113a14.12
nasp.1	2.16925e-36	1.50592	1	0.974	5.48149e-32	2	nasp
zgc:163040.2	2.22753e-36	1.24468	0.634	0.208	5.62875e-32	2	zgc:163040
mybl2b.1	2.3636e-36	2.49454	0.812	0.518	5.97257e-32	2	mybl2b
pold1.1	5.07845e-36	2.36716	0.914	0.723	1.28327e-31	2	pold1
chek1.2	5.91527e-36	3.25137	0.618	0.239	1.49473e-31	2	chek1
mxd3.2	1.14265e-35	2.18171	0.871	0.553	2.88736e-31	2	mxd3
lbr.2	2.33625e-35	1.32379	1	0.969	5.90346e-31	2	lbr
cdc45.2	3.01499e-35	2.91488	0.715	0.363	7.61857e-31	2	cdc45
haus4.2	1.43104e-34	2.64914	0.747	0.394	3.61609e-30	2	haus4
primpol.1	2.75767e-34	3.04698	0.704	0.342	6.96835e-30	2	primpol
prim2.1	1.0592e-33	2.23848	0.849	0.571	2.6765e-29	2	prim2
ccne2.1	1.86526e-33	2.81402	0.801	0.502	4.71332e-29	2	ccne2
dhfr.2	3.74161e-33	2.22565	0.79	0.482	9.45468e-29	2	dhfr
nutf2l.2	9.60134e-33	1.57735	0.968	0.778	2.42616e-28	2	nutf2l
hist1h4l:5.2	3.02883e-32	2.22039	0.64	0.265	7.65355e-28	2	hist1h4l:5
prim1.2	3.29191e-32	2.24778	0.817	0.515	8.31833e-28	2	prim1
dek.2	7.43339e-32	1.7605	0.882	0.637	1.87834e-27	2	dek
wdr76.2	1.53461e-31	1.85629	0.844	0.527	3.87782e-27	2	wdr76
ncaph.2	1.94977e-31	1.72294	0.849	0.572	4.92689e-27	2	ncaph
cks1b.2	3.05246e-31	1.55074	0.909	0.695	7.71326e-27	2	cks1b
pola1.1	3.74685e-31	2.25302	0.849	0.621	9.46792e-27	2	pola1
si:dkey-6i22.5.2	6.02703e-31	2.20059	0.715	0.367	1.52297e-26	2	si:dkey-6i22.5
atad2.2	1.74538e-30	2.2351	0.86	0.666	4.4104e-26	2	atad2
dctd	2.52217e-30	2.33101	0.753	0.441	6.37326e-26	2	dctd
dtymk.2	3.85631e-30	2.10605	0.731	0.41	9.7445e-26	2	dtymk
rfc3	4.43165e-30	1.75615	0.855	0.575	1.11983e-25	2	rfc3
rfc4.1	5.43997e-30	1.64605	0.941	0.743	1.37462e-25	2	rfc4
si:dkey-261m9.12.2	8.71587e-30	2.90548	0.559	0.23	2.20241e-25	2	si:dkey-261m9.12
zgc:110425.2	9.13248e-30	1.66692	0.876	0.631	2.30769e-25	2	zgc:110425
pola2.2	1.34936e-29	2.69951	0.763	0.493	3.40971e-25	2	pola2
si:ch73-36p18.1.2	1.41677e-29	3.31297	0.349	0.079	3.58003e-25	2	si:ch73-36p18.1
cdk1.2	2.61553e-29	0.705501	0.968	0.877	6.60919e-25	2	cdk1
rfc1.1	5.75376e-29	1.85874	0.78	0.458	1.45392e-24	2	rfc1
si:dkey-185e18.7.1	5.77644e-29	2.3709	0.629	0.284	1.45965e-24	2	si:dkey-185e18.7
si:dkey-108k21.21.2	9.15462e-29	2.37587	0.43	0.122	2.31328e-24	2	si:dkey-108k21.21
kif15.2	9.90232e-29	2.24698	0.737	0.431	2.50222e-24	2	kif15
dnmt1	4.87489e-28	1.73044	0.855	0.676	1.23184e-23	2	dnmt1
hmgb1b.1	6.53765e-28	1.22828	0.989	0.956	1.652e-23	2	hmgb1b
nsl1.2	8.52163e-28	2.57451	0.565	0.244	2.15333e-23	2	nsl1
btg3.2	1.04287e-27	1.9226	0.774	0.512	2.63522e-23	2	btg3
pole2.1	1.04559e-27	2.74467	0.613	0.298	2.6421e-23	2	pole2
kntc1.2	2.43674e-27	2.19578	0.624	0.298	6.15739e-23	2	kntc1
dut.1	3.50777e-27	0.75112	0.952	0.694	8.86379e-23	2	dut
mcm7.2	3.52764e-27	1.42262	0.995	0.966	8.91399e-23	2	mcm7
kl.1	4.11882e-27	1.19886	0.602	0.248	1.04078e-22	2	kl
CABZ01058261.1.2	4.93324e-27	1.24264	0.914	0.789	1.24658e-22	2	CABZ01058261.1
rfc5	1.09737e-26	1.70245	0.866	0.607	2.77295e-22	2	rfc5
tuba8l.2	2.9262e-26	0.62984	1	1	7.39422e-22	2	tuba8l
dnmt3bb.3.2	3.03285e-26	2.82321	0.522	0.21	7.66371e-22	2	dnmt3bb.3
banf1.2	8.63944e-26	1.02123	1	0.978	2.1831e-21	2	banf1
timeless.1	9.25299e-26	1.80118	0.785	0.482	2.33814e-21	2	timeless
ranbp1.2	1.09716e-25	0.971266	1	0.979	2.77241e-21	2	ranbp1
anp32b.2	1.84797e-25	0.924898	1	0.994	4.66964e-21	2	anp32b
atad5a.1	2.24055e-25	2.00169	0.747	0.453	5.66165e-21	2	atad5a
dsn1.2	2.34743e-25	2.10587	0.704	0.41	5.93173e-21	2	dsn1
si:ch211-161h7.4.1	2.95228e-25	1.9794	0.79	0.554	7.46012e-21	2	si:ch211-161h7.4
aurkb.2	3.20155e-25	1.39437	0.914	0.788	8.08998e-21	2	aurkb
si:dkey-23a13.17.2	3.63145e-25	2.23693	0.339	0.085	9.17631e-21	2	si:dkey-23a13.17
rpa1	5.62235e-25	1.39847	0.978	0.949	1.42071e-20	2	rpa1
cdca5.2	7.09421e-25	1.68684	0.769	0.495	1.79264e-20	2	cdca5
top2a.2	3.92657e-24	1.01422	0.957	0.847	9.92205e-20	2	top2a
rnaseh2a.1	4.41411e-24	1.61171	0.86	0.627	1.1154e-19	2	rnaseh2a
pold3	5.30334e-24	1.95122	0.796	0.566	1.3401e-19	2	pold3
nap1l1.1	8.04985e-24	0.942165	1	0.988	2.03412e-19	2	nap1l1
mki67.2	9.02822e-24	0.745286	0.968	0.828	2.28134e-19	2	mki67
mis12.2	1.14411e-23	2.2975	0.629	0.325	2.89105e-19	2	mis12
fanci.1	1.3781e-23	2.78326	0.565	0.279	3.48232e-19	2	fanci
rad51	2.04658e-23	1.85829	0.801	0.606	5.1715e-19	2	rad51
dscc1	2.59262e-23	3.24154	0.554	0.285	6.55129e-19	2	dscc1
unga.2	2.96187e-23	2.57302	0.532	0.244	7.48435e-19	2	unga
si:ch211-156b7.4.1	3.39635e-23	1.98337	0.817	0.609	8.58223e-19	2	si:ch211-156b7.4
ncapd3.1	3.94075e-23	2.85956	0.667	0.404	9.95788e-19	2	ncapd3
ncapg.2	5.04445e-23	1.9193	0.812	0.614	1.27468e-18	2	ncapg
neil3.2	6.7963e-23	2.3788	0.591	0.296	1.71736e-18	2	neil3
cenph.2	9.24286e-23	2.65788	0.452	0.17	2.33558e-18	2	cenph
ncapg2.2	1.05947e-22	3.19601	0.672	0.421	2.67717e-18	2	ncapg2
orc4.1	2.63541e-22	1.76911	0.823	0.605	6.65943e-18	2	orc4
foxm1.2	3.46208e-22	2.58146	0.478	0.198	8.74833e-18	2	foxm1
haus1.1	3.6519e-22	2.44702	0.554	0.27	9.228e-18	2	haus1
mad2l1.2	4.99459e-22	1.06321	0.903	0.716	1.26208e-17	2	mad2l1
shmt1.1	5.11352e-22	1.70382	0.844	0.67	1.29214e-17	2	shmt1
kif22.2	8.83467e-22	0.950739	0.909	0.776	2.23243e-17	2	kif22
aaas	1.03718e-21	2.33052	0.747	0.526	2.62085e-17	2	aaas
trip13.1	1.11742e-21	2.40019	0.597	0.315	2.82361e-17	2	trip13
rfc2.1	1.45511e-21	1.74951	0.823	0.604	3.67693e-17	2	rfc2
rad54l.1	1.47486e-21	2.8694	0.591	0.328	3.72682e-17	2	rad54l
ppm1g.2	1.71486e-21	1.13197	0.973	0.927	4.33329e-17	2	ppm1g
ncapd2.2	1.72558e-21	1.43693	0.871	0.732	4.36037e-17	2	ncapd2
pbk.2	1.80425e-21	1.39029	0.823	0.555	4.55916e-17	2	pbk
ndc80.2	2.13652e-21	1.53737	0.801	0.56	5.39877e-17	2	ndc80
seta.2	2.25398e-21	0.720908	1	1	5.69559e-17	2	seta
cdk2.1	2.76831e-21	1.49441	0.871	0.723	6.99523e-17	2	cdk2
si:dkeyp-26a9.2.2	3.29247e-21	1.66827	0.694	0.419	8.31973e-17	2	si:dkeyp-26a9.2
pom121.2	4.28513e-21	1.6533	0.871	0.724	1.08281e-16	2	pom121
spc24.2	5.05383e-21	1.42952	0.801	0.556	1.27705e-16	2	spc24
slc20a1b	1.32707e-20	1.15217	0.989	0.94	3.35337e-16	2	slc20a1b
xkr5b.2	1.41719e-20	3.01624	0.339	0.11	3.58109e-16	2	xkr5b
dna2	1.80104e-20	2.60885	0.505	0.228	4.55106e-16	2	dna2
wdhd1	2.11485e-20	1.90877	0.747	0.529	5.34402e-16	2	wdhd1
asf1bb	3.60675e-20	1.76751	0.812	0.632	9.11388e-16	2	asf1bb
chek2	4.31904e-20	2.85771	0.516	0.248	1.09138e-15	2	chek2
psmc3ip.1	4.33965e-20	2.47259	0.446	0.187	1.09659e-15	2	psmc3ip
pmp22a.2	4.55836e-20	0.73615	0.995	0.995	1.15185e-15	2	pmp22a
cenps.2	4.55854e-20	1.92083	0.543	0.246	1.1519e-15	2	cenps
chtf8.2	4.81407e-20	1.81714	0.618	0.341	1.21647e-15	2	chtf8
tuba8l4.2	5.514e-20	0.651584	1	1	1.39333e-15	2	tuba8l4
adssl.1	1.11995e-19	1.54957	0.914	0.791	2.82999e-15	2	adssl
swi5.2	1.17545e-19	2.41582	0.495	0.234	2.97024e-15	2	swi5
hat1	1.28588e-19	1.24024	0.898	0.732	3.24929e-15	2	hat1
zgc:112234:9.2	1.41429e-19	1.15719	0.516	0.22	3.57376e-15	2	zgc:112234:9
e2f7	1.87785e-19	3.03213	0.446	0.191	4.74513e-15	2	e2f7
dck.1	2.11019e-19	3.64525	0.344	0.119	5.33223e-15	2	dck
rad18.1	2.13586e-19	2.25194	0.629	0.369	5.39711e-15	2	rad18
skp2.2	2.25236e-19	2.4416	0.597	0.338	5.69149e-15	2	skp2
nup93	2.40247e-19	1.3064	0.935	0.83	6.0708e-15	2	nup93
tubb4b.2	2.90213e-19	0.44781	1	1	7.33338e-15	2	tubb4b
suv39h1b.1	3.36538e-19	2.06165	0.661	0.415	8.50398e-15	2	suv39h1b
si:ch211-153a8.4.1	3.77553e-19	2.63028	0.5	0.244	9.54039e-15	2	si:ch211-153a8.4
h2ax.2	4.36776e-19	1.28711	0.892	0.689	1.10369e-14	2	h2ax
haus6.1	4.5555e-19	2.32442	0.672	0.426	1.15113e-14	2	haus6
dclre1b	7.94425e-19	2.12621	0.726	0.489	2.00743e-14	2	dclre1b
stag2b.2	8.37508e-19	0.862172	1	0.994	2.1163e-14	2	stag2b
gtse1.2	1.15554e-18	1.28976	0.667	0.411	2.91992e-14	2	gtse1
nemp1.1	1.21849e-18	1.98791	0.565	0.295	3.07899e-14	2	nemp1
si:dkey-23a13.9.2	1.30732e-18	1.98806	0.301	0.087	3.30346e-14	2	si:dkey-23a13.9
ivns1abpb	1.47316e-18	1.81361	0.855	0.692	3.72254e-14	2	ivns1abpb
hist1h2a1.2	2.14854e-18	1.31196	0.263	0.068	5.42915e-14	2	hist1h2a1
pole4.1	2.1817e-18	1.30767	0.618	0.323	5.51293e-14	2	pole4
sass6.2	2.29877e-18	2.71333	0.468	0.214	5.80877e-14	2	sass6
si:dkey-108k21.14.2	2.7727e-18	1.39502	0.263	0.069	7.00633e-14	2	si:dkey-108k21.14
gins1	3.00994e-18	1.96897	0.651	0.427	7.60582e-14	2	gins1
znf367.1	3.70163e-18	1.73925	0.532	0.26	9.35365e-14	2	znf367
zwilch.2	3.84032e-18	2.06206	0.457	0.199	9.70409e-14	2	zwilch
hmgb2b.1	3.89997e-18	0.585526	1	1	9.85483e-14	2	hmgb2b
cep57l1.1	4.26244e-18	2.27522	0.597	0.347	1.07708e-13	2	cep57l1
mis18a.2	4.44112e-18	2.36073	0.489	0.228	1.12223e-13	2	mis18a
hist1h2a2.2	4.48545e-18	1.95282	0.253	0.064	1.13343e-13	2	hist1h2a2
dtl.1	5.97279e-18	2.27912	0.554	0.306	1.50926e-13	2	dtl
sumo3a.1	6.47903e-18	0.727246	1	0.997	1.63719e-13	2	sumo3a
cenpn.2	7.31867e-18	2.32655	0.57	0.317	1.84936e-13	2	cenpn
vrk1.2	8.15728e-18	1.42201	0.597	0.311	2.06126e-13	2	vrk1
zgc:173585.1	9.13239e-18	2.18015	0.21	0.046	2.30766e-13	2	zgc:173585
si:ch73-368j24.11.2	9.67963e-18	3.23012	0.188	0.038	2.44594e-13	2	si:ch73-368j24.11
cdc7	9.72038e-18	2.42297	0.559	0.313	2.45624e-13	2	cdc7
rnaseh2b	9.95411e-18	1.47124	0.71	0.482	2.5153e-13	2	rnaseh2b
si:ch1073-228h2.2.2	1.0252e-17	2.66611	0.349	0.133	2.59057e-13	2	si:ch1073-228h2.2
si:ch211-113a14.11.2	1.16503e-17	2.34286	0.22	0.051	2.9439e-13	2	si:ch211-113a14.11
hist1h2a6.2	1.36285e-17	2.63939	0.253	0.068	3.44378e-13	2	hist1h2a6
si:ch211-114n24.6.2	1.44215e-17	0.649832	0.984	0.968	3.64416e-13	2	si:ch211-114n24.6
gins4.1	1.58168e-17	1.86098	0.608	0.341	3.99676e-13	2	gins4
cks2.2	2.83577e-17	0.687251	0.624	0.326	7.1657e-13	2	cks2
uhrf1.1	3.02538e-17	1.02532	0.925	0.792	7.64482e-13	2	uhrf1
ing5b.2	3.0758e-17	2.1155	0.495	0.251	7.77225e-13	2	ing5b
pold2	3.54681e-17	2.01963	0.656	0.427	8.96243e-13	2	pold2
cenpi.2	4.13425e-17	1.61635	0.575	0.317	1.04468e-12	2	cenpi
bub3.2	4.3515e-17	0.969121	0.935	0.814	1.09958e-12	2	bub3
aurka.2	7.38775e-17	0.758698	0.801	0.616	1.86681e-12	2	aurka
nucks1b.2	7.77114e-17	1.45469	0.855	0.741	1.96369e-12	2	nucks1b
si:dkey-108k21.19.2	1.09879e-16	1.87525	0.253	0.068	2.77654e-12	2	si:dkey-108k21.19
cep152.1	1.2e-16	2.03809	0.349	0.129	3.03227e-12	2	cep152
sinhcafl.2	1.40649e-16	1.52356	0.812	0.633	3.55407e-12	2	sinhcafl
cenpo.1	1.65662e-16	3.03541	0.392	0.17	4.1861e-12	2	cenpo
brca2	1.66584e-16	2.255	0.511	0.259	4.2094e-12	2	brca2
hmga1a.2	2.03735e-16	0.514663	1	1	5.14819e-12	2	hmga1a
rtkn2a.2	2.33923e-16	1.31404	0.5	0.235	5.91101e-12	2	rtkn2a
cnbpa.2	2.77858e-16	0.821928	0.989	0.992	7.0212e-12	2	cnbpa
terf1.2	2.80972e-16	2.60101	0.441	0.213	7.09988e-12	2	terf1
si:ch1073-153i20.4.1	2.87314e-16	1.98973	0.301	0.098	7.26014e-12	2	si:ch1073-153i20.4
tmpob.2	4.18964e-16	1.27954	0.849	0.685	1.05868e-11	2	tmpob
hirip3.1	4.47593e-16	1.64802	0.694	0.492	1.13102e-11	2	hirip3
si:ch1073-159d7.7.1	4.72465e-16	3.54243	0.151	0.027	1.19387e-11	2	si:ch1073-159d7.7
si:ch73-368j24.12.1	4.81543e-16	1.83666	0.237	0.063	1.21681e-11	2	si:ch73-368j24.12
gins3.1	5.63899e-16	2.02944	0.543	0.306	1.42492e-11	2	gins3
recql4	6.27917e-16	3.22037	0.36	0.148	1.58668e-11	2	recql4
haus3.2	6.54762e-16	2.19669	0.575	0.341	1.65452e-11	2	haus3
exo1.1	7.19881e-16	3.54561	0.414	0.194	1.81907e-11	2	exo1
ssrp1a	7.31457e-16	0.96193	0.941	0.862	1.84832e-11	2	ssrp1a
ptmaa.1	1.15185e-15	0.627359	1	0.996	2.91061e-11	2	ptmaa
si:ch1073-153i20.5.2	1.44139e-15	2.44655	0.167	0.034	3.64224e-11	2	si:ch1073-153i20.5
mus81.2	1.57256e-15	2.01507	0.586	0.35	3.9737e-11	2	mus81
haus5.1	1.72176e-15	2.19156	0.548	0.298	4.35072e-11	2	haus5
hist1h4l:2.2	1.76981e-15	1.21984	0.194	0.044	4.47213e-11	2	hist1h4l:2
cenpk.1	1.87816e-15	1.81367	0.591	0.36	4.74592e-11	2	cenpk
si:ch211-113a14.19:3.2	2.44656e-15	1.50288	0.237	0.064	6.18221e-11	2	si:ch211-113a14.19:3
ercc6l.2	3.41399e-15	2.39828	0.473	0.243	8.62681e-11	2	ercc6l
kif18a.2	3.89702e-15	2.33939	0.538	0.315	9.84738e-11	2	kif18a
ran.2	5.07806e-15	0.55293	1	1	1.28317e-10	2	ran
hmgb2a.2	7.0591e-15	0.404163	1	0.987	1.78376e-10	2	hmgb2a
cbx1a.1	7.184e-15	0.880433	0.962	0.884	1.81533e-10	2	cbx1a
si:ch211-113a14.19:4.2	8.34498e-15	2.20443	0.188	0.044	2.10869e-10	2	si:ch211-113a14.19:4
prpf19.1	8.38e-15	0.881173	0.978	0.96	2.11754e-10	2	prpf19
uba2.2	9.57497e-15	1.01964	0.93	0.872	2.4195e-10	2	uba2
cdc23.2	1.03983e-14	1.64989	0.618	0.368	2.62755e-10	2	cdc23
etaa1.1	1.20881e-14	2.6719	0.425	0.206	3.05454e-10	2	etaa1
pole	1.38515e-14	2.30162	0.489	0.251	3.50015e-10	2	pole
lctlb.2	1.47937e-14	3.10025	0.188	0.045	3.73822e-10	2	lctlb
iqgap3.2	1.85504e-14	1.34227	0.575	0.317	4.68749e-10	2	iqgap3
plk1.2	1.87339e-14	0.416507	0.978	0.948	4.73387e-10	2	plk1
brd3a.1	2.75036e-14	1.00787	0.914	0.81	6.94988e-10	2	brd3a
dlgap5.2	3.84335e-14	0.655041	0.844	0.699	9.71177e-10	2	dlgap5
snrpd1.1	4.61733e-14	0.815898	0.989	0.929	1.16675e-09	2	snrpd1
blm.2	6.07488e-14	2.63711	0.398	0.189	1.53506e-09	2	blm
dnmt3bb.2.1	6.19367e-14	2.14896	0.505	0.28	1.56508e-09	2	dnmt3bb.2
ctdspl2b.1	7.03387e-14	1.77703	0.608	0.402	1.77739e-09	2	ctdspl2b
cenpl.2	8.56548e-14	2.3547	0.446	0.226	2.16441e-09	2	cenpl
msh6	9.97145e-14	1.66252	0.688	0.457	2.51969e-09	2	msh6
topbp1.1	1.10726e-13	2.15045	0.409	0.196	2.79795e-09	2	topbp1
zgc:86764.2	1.13017e-13	1.49153	0.688	0.488	2.85582e-09	2	zgc:86764
ncaph2.1	1.18594e-13	2.25307	0.602	0.398	2.99675e-09	2	ncaph2
si:dkey-149m13.5	1.74364e-13	1.58307	0.269	0.088	4.40599e-09	2	si:dkey-149m13.5
chtf18.1	1.78681e-13	1.91067	0.489	0.266	4.51509e-09	2	chtf18
rmi2.1	1.97736e-13	1.78599	0.306	0.116	4.9966e-09	2	rmi2
uck2b.1	2.33746e-13	1.0636	0.882	0.728	5.90654e-09	2	uck2b
dcps.1	2.36973e-13	1.47986	0.688	0.476	5.98806e-09	2	dcps
ckap2l.2	2.46372e-13	1.37043	0.661	0.426	6.22558e-09	2	ckap2l
cenpt.1	2.6678e-13	1.42031	0.559	0.336	6.74127e-09	2	cenpt
tpx2.2	2.9566e-13	0.53207	0.925	0.831	7.47103e-09	2	tpx2
nsd2.1	3.46494e-13	1.62015	0.726	0.585	8.75555e-09	2	nsd2
brip1.1	3.54026e-13	3.06207	0.441	0.242	8.94588e-09	2	brip1
orc5	4.20612e-13	2.06601	0.597	0.38	1.06284e-08	2	orc5
rad51d.1	4.60826e-13	2.69909	0.29	0.111	1.16446e-08	2	rad51d
dbf4.2	4.88129e-13	1.47769	0.57	0.348	1.23345e-08	2	dbf4
nuf2.2	4.9977e-13	1.44979	0.608	0.384	1.26287e-08	2	nuf2
smarca5.1	5.54631e-13	0.827138	0.989	0.932	1.4015e-08	2	smarca5
armc1l.2	5.81647e-13	0.918113	0.737	0.533	1.46976e-08	2	armc1l
kpnb1.1	5.90663e-13	0.790505	0.984	0.95	1.49255e-08	2	kpnb1
cdc6	6.33535e-13	1.62418	0.817	0.667	1.60088e-08	2	cdc6
siva1.1	6.87669e-13	1.25115	0.651	0.443	1.73767e-08	2	siva1
mier1a.1	7.3481e-13	1.52232	0.651	0.446	1.85679e-08	2	mier1a
nusap1.2	7.55358e-13	0.335953	0.855	0.728	1.90871e-08	2	nusap1
zgc:173552:5.1	8.69356e-13	2.46148	0.312	0.128	2.19678e-08	2	zgc:173552:5
CU457819.1.1	1.16577e-12	3.21983	0.118	0.021	2.94579e-08	2	CU457819.1
cip2a.1	1.45983e-12	1.61324	0.618	0.434	3.68884e-08	2	cip2a
hist1h2a4.2	1.47879e-12	1.96013	0.156	0.036	3.73675e-08	2	hist1h2a4
diaph3.2	1.50966e-12	2.33896	0.414	0.206	3.81476e-08	2	diaph3
tubg1.1	1.83188e-12	0.971279	0.909	0.821	4.62898e-08	2	tubg1
cdc25b.2	1.96228e-12	0.664903	0.839	0.702	4.9585e-08	2	cdc25b
si:ch73-281n10.2.2	1.99029e-12	0.264724	1	0.999	5.02926e-08	2	si:ch73-281n10.2
nup37.1	2.04189e-12	1.66434	0.575	0.358	5.15966e-08	2	nup37
zgc:163080.1	2.22376e-12	1.31134	0.597	0.364	5.61923e-08	2	zgc:163080
eif3ba.1	2.31771e-12	0.60226	0.995	0.999	5.85663e-08	2	eif3ba
mms22l	2.50257e-12	3.35057	0.462	0.272	6.32374e-08	2	mms22l
hcfc1a.2	2.58372e-12	0.690321	0.946	0.827	6.52879e-08	2	hcfc1a
ahcy.1	2.60324e-12	0.739455	0.984	0.924	6.57813e-08	2	ahcy
zswim7.1	2.74212e-12	2.98566	0.253	0.09	6.92906e-08	2	zswim7
gmnn.1	2.91849e-12	1.98434	0.543	0.342	7.37472e-08	2	gmnn
mcm9.1	2.95399e-12	2.35065	0.323	0.137	7.46444e-08	2	mcm9
kif2c.2	3.0173e-12	1.30193	0.704	0.534	7.6244e-08	2	kif2c
calm3a.1	3.17555e-12	0.486875	1	1	8.0243e-08	2	calm3a
racgap1.2	3.19955e-12	1.0454	0.769	0.647	8.08496e-08	2	racgap1
cep128	3.34884e-12	3.4739	0.215	0.07	8.46217e-08	2	cep128
si:ch211-63o20.7.2	3.36744e-12	1.5979	0.543	0.324	8.50918e-08	2	si:ch211-63o20.7
ccdc106a	3.36857e-12	1.09626	0.591	0.363	8.51204e-08	2	ccdc106a
mnd1	3.65464e-12	1.93312	0.435	0.24	9.2349e-08	2	mnd1
plk4.2	4.19088e-12	2.39484	0.543	0.345	1.05899e-07	2	plk4
cita.1	4.23721e-12	2.53763	0.339	0.154	1.0707e-07	2	cita
zgc:153409.2	4.36894e-12	0.976197	0.763	0.575	1.10399e-07	2	zgc:153409
si:ch73-352p4.5.1	4.58023e-12	1.56868	0.409	0.208	1.15738e-07	2	si:ch73-352p4.5
cse1l.1	4.92539e-12	1.40552	0.817	0.706	1.2446e-07	2	cse1l
ccnb2.2	4.99398e-12	1.41736	0.522	0.305	1.26193e-07	2	ccnb2
ska1.2	5.5165e-12	1.98981	0.382	0.189	1.39396e-07	2	ska1
lin37	5.57e-12	1.21433	0.694	0.487	1.40748e-07	2	lin37
nup58.1	5.77347e-12	1.13817	0.817	0.651	1.4589e-07	2	nup58
setb.2	5.8864e-12	0.710114	1	0.996	1.48744e-07	2	setb
clgn.1	6.20182e-12	1.42292	0.763	0.656	1.56714e-07	2	clgn
hmgn7.1	6.88008e-12	0.507075	1	0.997	1.73853e-07	2	hmgn7
gins2	7.00251e-12	1.63944	0.575	0.379	1.76946e-07	2	gins2
pole3	7.13675e-12	1.32079	0.71	0.547	1.80338e-07	2	pole3
cbx5.1	7.53091e-12	0.55953	1	0.999	1.90299e-07	2	cbx5
mtf2.2	8.01889e-12	1.66812	0.495	0.293	2.02629e-07	2	mtf2
arhgef39.1	8.45991e-12	1.59472	0.656	0.503	2.13773e-07	2	arhgef39
hist1h4l:17.1	9.62572e-12	1.39537	0.156	0.038	2.43232e-07	2	hist1h4l:17
sgo1.2	9.65504e-12	1.23057	0.72	0.534	2.43973e-07	2	sgo1
atad5b	1.02749e-11	2.12602	0.452	0.244	2.59637e-07	2	atad5b
usp1	1.04311e-11	1.30898	0.833	0.681	2.63583e-07	2	usp1
si:ch211-222l21.1.2	1.16848e-11	0.394956	1	1	2.95264e-07	2	si:ch211-222l21.1
FP325123.2.2	1.28342e-11	2.17677	0.118	0.023	3.24306e-07	2	FP325123.2
oscp1a.2	1.5523e-11	1.38171	0.22	0.071	3.92251e-07	2	oscp1a
CT025742.1	1.7812e-11	2.10164	0.452	0.259	4.50091e-07	2	CT025742.1
rb1.1	1.96052e-11	0.900067	0.903	0.811	4.95403e-07	2	rb1
smc1al.2	2.03091e-11	0.716461	0.995	0.929	5.13192e-07	2	smc1al
zw10.1	2.08368e-11	1.29473	0.753	0.587	5.26524e-07	2	zw10
tonsl	2.10051e-11	3.13937	0.323	0.153	5.30778e-07	2	tonsl
selenoh.1	2.37687e-11	0.840717	0.941	0.828	6.00612e-07	2	selenoh
knstrn.2	2.41925e-11	1.23125	0.495	0.283	6.11322e-07	2	knstrn
tp53bp1	2.47132e-11	1.23843	0.699	0.494	6.24479e-07	2	tp53bp1
srsf2a.2	2.93917e-11	0.612983	1	0.999	7.42699e-07	2	srsf2a
arhgap11a.2	3.2574e-11	1.83477	0.597	0.446	8.23112e-07	2	arhgap11a
eme1.2	3.39775e-11	1.52894	0.425	0.218	8.58579e-07	2	eme1
ndnl2.1	3.49118e-11	1.20757	0.694	0.499	8.82186e-07	2	ndnl2
ezh2.1	4.06383e-11	1.06322	0.871	0.765	1.02689e-06	2	ezh2
si:dkey-148h10.5.1	4.2252e-11	1.82008	0.301	0.129	1.06767e-06	2	si:dkey-148h10.5
espl1.1	4.73168e-11	2.33212	0.398	0.205	1.19565e-06	2	espl1
polr3glb.2	5.08151e-11	0.925587	0.629	0.422	1.28405e-06	2	polr3glb
pdgfaa:1.2	5.19612e-11	1.63924	0.387	0.192	1.31301e-06	2	pdgfaa:1
tfam	5.40638e-11	0.995615	0.796	0.62	1.36614e-06	2	tfam
ipo9.1	5.66986e-11	1.35001	0.731	0.596	1.43272e-06	2	ipo9
stil	5.67389e-11	2.90155	0.349	0.177	1.43374e-06	2	stil
spc25.2	6.03052e-11	0.984261	0.672	0.453	1.52385e-06	2	spc25
mcm3	6.23202e-11	0.85311	0.968	0.914	1.57477e-06	2	mcm3
kif4.1	6.35927e-11	2.71489	0.473	0.278	1.60692e-06	2	kif4
si:ch211-171l17.14	6.4809e-11	2.64022	0.113	0.023	1.63766e-06	2	si:ch211-171l17.14
msh2	6.88691e-11	2.14186	0.624	0.468	1.74025e-06	2	msh2
cnbpb.1	6.90746e-11	0.603657	0.978	0.986	1.74544e-06	2	cnbpb
si:ch211-161m3.1.1	6.94643e-11	2.44247	0.188	0.06	1.75529e-06	2	si:ch211-161m3.1
orc2	8.15493e-11	1.59523	0.548	0.357	2.06067e-06	2	orc2
txndc11	8.38486e-11	1.60499	0.608	0.396	2.11877e-06	2	txndc11
paxip1	8.58121e-11	1.39758	0.656	0.488	2.16839e-06	2	paxip1
hist1h4l:9	8.62793e-11	1.19575	0.226	0.077	2.18019e-06	2	hist1h4l:9
si:dkey-21c19.3.1	8.63364e-11	1.41736	0.656	0.462	2.18163e-06	2	si:dkey-21c19.3
fancl	8.78862e-11	3.34645	0.226	0.083	2.2208e-06	2	fancl
xrcc1.1	9.51644e-11	1.63074	0.715	0.545	2.40471e-06	2	xrcc1
CABZ01068251.1	9.82672e-11	1.30347	0.667	0.497	2.48311e-06	2	CABZ01068251.1
si:dkey-170l10.1.2	9.84144e-11	1.59859	0.43	0.243	2.48683e-06	2	si:dkey-170l10.1
tfdp1b.1	1.06252e-10	1.12367	0.774	0.585	2.68487e-06	2	tfdp1b
palb2	1.07189e-10	2.27045	0.269	0.111	2.70857e-06	2	palb2
zgc:112496.1	1.13758e-10	2.12373	0.414	0.235	2.87455e-06	2	zgc:112496
knl1.1	1.14375e-10	1.26233	0.495	0.293	2.89015e-06	2	knl1
cenpw.2	1.17872e-10	0.867695	0.613	0.407	2.97851e-06	2	cenpw
kifc1.2	1.2287e-10	0.773568	0.828	0.752	3.1048e-06	2	kifc1
cenpp.1	1.25704e-10	1.86054	0.419	0.235	3.17641e-06	2	cenpp
ranbp3b.1	1.4072e-10	0.957933	0.742	0.524	3.55584e-06	2	ranbp3b
si:ch211-266i6.3.2	1.45213e-10	1.35019	0.651	0.48	3.66938e-06	2	si:ch211-266i6.3
srrt.1	1.5106e-10	0.808291	0.903	0.81	3.81712e-06	2	srrt
nup62l	1.88806e-10	1.01061	0.882	0.792	4.77094e-06	2	nup62l
supt16h	2.06838e-10	0.833677	0.817	0.66	5.2266e-06	2	supt16h
si:dkey-66i24.9.1	2.16416e-10	2.10125	0.43	0.241	5.46862e-06	2	si:dkey-66i24.9
cep76.1	2.20778e-10	2.67461	0.204	0.07	5.57883e-06	2	cep76
cetn3.2	2.31918e-10	1.04257	0.597	0.386	5.86034e-06	2	cetn3
crnkl1	2.44073e-10	0.750116	0.828	0.709	6.16747e-06	2	crnkl1
scmh1.2	2.52904e-10	1.65495	0.57	0.385	6.39062e-06	2	scmh1
haus7.1	2.66682e-10	1.55678	0.559	0.364	6.7388e-06	2	haus7
baz1b	2.69469e-10	1.1265	0.909	0.806	6.80922e-06	2	baz1b
rad51ap1.1	2.72586e-10	1.5072	0.36	0.18	6.88797e-06	2	rad51ap1
zgc:172014.1	2.91668e-10	2.8527	0.097	0.018	7.37015e-06	2	zgc:172014
nup43	3.34185e-10	1.29057	0.554	0.356	8.44451e-06	2	nup43
cenpj	3.47226e-10	2.8918	0.29	0.133	8.77406e-06	2	cenpj
rad1.1	3.58446e-10	2.00661	0.414	0.237	9.05756e-06	2	rad1
smc3.2	3.64437e-10	0.790616	0.914	0.845	9.20897e-06	2	smc3
abce1.1	3.8809e-10	0.764593	0.978	0.951	9.80665e-06	2	abce1
daxx	3.88609e-10	1.0768	0.699	0.506	9.81977e-06	2	daxx
cenpx.1	4.13055e-10	1.22198	0.597	0.423	1.04375e-05	2	cenpx
si:dkey-260c8.8.1	4.28307e-10	3.34152	0.253	0.103	1.08229e-05	2	si:dkey-260c8.8
si:dkey-63j12.4	4.3256e-10	2.80238	0.086	0.014	1.09304e-05	2	si:dkey-63j12.4
pgbd4.1	4.58411e-10	0.731115	0.624	0.425	1.15836e-05	2	pgbd4
zgc:153352	4.64953e-10	2.15151	0.371	0.194	1.17489e-05	2	zgc:153352
zgc:171759:1.2	4.91008e-10	0.684734	0.145	0.038	1.24073e-05	2	zgc:171759:1
anp32a.2	5.06551e-10	0.414537	1	0.998	1.28e-05	2	anp32a
kpnb3	5.71478e-10	0.732107	0.887	0.819	1.44407e-05	2	kpnb3
si:dkey-103i16.6	5.8995e-10	2.94367	0.134	0.035	1.49074e-05	2	si:dkey-103i16.6
abcf2a	6.20721e-10	0.784009	0.962	0.922	1.5685e-05	2	abcf2a
mtbp.1	6.43184e-10	1.81867	0.317	0.147	1.62526e-05	2	mtbp
parp1	6.74236e-10	1.12527	0.844	0.75	1.70373e-05	2	parp1
smpd4.1	7.13227e-10	1.03057	0.613	0.41	1.80225e-05	2	smpd4
znfl2a.1	8.12128e-10	2.51822	0.425	0.254	2.05217e-05	2	znfl2a
cep135.1	8.2262e-10	1.97391	0.5	0.324	2.07868e-05	2	cep135
poc1b.1	8.64342e-10	2.18187	0.446	0.26	2.18411e-05	2	poc1b
api5.1	1.0682e-09	0.526368	0.946	0.901	2.69923e-05	2	api5
si:ch211-139a5.1	1.09469e-09	1.24561	0.376	0.189	2.76618e-05	2	si:ch211-139a5.1
ubr7	1.11736e-09	1.04612	0.86	0.767	2.82346e-05	2	ubr7
hist1h4l:19.2	1.24758e-09	1.07056	0.194	0.064	3.15252e-05	2	hist1h4l:19
polg.1	1.2723e-09	1.59809	0.312	0.139	3.21498e-05	2	polg
CU457819.3.2	1.32167e-09	2.06222	0.156	0.046	3.33974e-05	2	CU457819.3
hnrnpabb.2	1.39895e-09	0.486583	1	1	3.535e-05	2	hnrnpabb
ndc1.1	1.5455e-09	1.43034	0.737	0.614	3.90532e-05	2	ndc1
tmpoa.2	1.74213e-09	0.605737	0.903	0.824	4.40219e-05	2	tmpoa
si:dkey-95p16.2.1	1.74848e-09	0.951294	0.484	0.277	4.41824e-05	2	si:dkey-95p16.2
fanca	1.77063e-09	2.37055	0.22	0.086	4.47422e-05	2	fanca
hist1h2a10:1.2	2.07813e-09	1.59427	0.151	0.043	5.25123e-05	2	hist1h2a10:1
zgc:136472	2.38926e-09	3.15018	0.091	0.018	6.03743e-05	2	zgc:136472
znf977.1	2.4186e-09	1.48736	0.237	0.094	6.11157e-05	2	znf977
zgc:110239.2	2.50277e-09	0.459986	0.978	0.971	6.32424e-05	2	zgc:110239
xylb	3.03271e-09	1.83414	0.323	0.166	7.66336e-05	2	xylb
arpp19b.2	3.11856e-09	0.587906	0.882	0.744	7.88029e-05	2	arpp19b
zranb3.1	3.63907e-09	2.79161	0.425	0.25	9.19558e-05	2	zranb3
etf1b.1	3.68507e-09	0.57408	1	0.987	9.3118e-05	2	etf1b
rbb4l.1	3.81203e-09	0.841856	0.962	0.952	9.63262e-05	2	rbb4l
si:ch211-59d8.3	3.87308e-09	1.64115	0.086	0.016	9.78688e-05	2	si:ch211-59d8.3
si:ch211-244o22.2.2	3.92439e-09	0.627065	0.683	0.536	9.91655e-05	2	si:ch211-244o22.2
spdl1.2	4.15092e-09	0.948286	0.737	0.606	0.00010489	2	spdl1
phf19	4.7199e-09	2.94217	0.188	0.068	0.000119267	2	phf19
mcm8	4.79796e-09	2.60412	0.237	0.101	0.00012124	2	mcm8
mcm6.2	5.00945e-09	0.898473	0.925	0.893	0.000126584	2	mcm6
ss18	5.62357e-09	0.697741	0.887	0.764	0.000142102	2	ss18
si:ch211-266k8.4.2	5.68521e-09	2.26314	0.29	0.14	0.00014366	2	si:ch211-266k8.4
nsmce1	6.14918e-09	2.58813	0.285	0.137	0.000155384	2	nsmce1
rnaseh2c.1	6.53325e-09	0.974708	0.656	0.508	0.000165089	2	rnaseh2c
CABZ01075242.1	7.20889e-09	1.57064	0.371	0.203	0.000182161	2	CABZ01075242.1
flt4.2	7.22191e-09	0.430355	0.995	0.999	0.00018249	2	flt4
mis18bp1.1	7.98782e-09	1.19134	0.349	0.179	0.000201844	2	mis18bp1
dpy30.2	8.30214e-09	0.609179	0.887	0.714	0.000209787	2	dpy30
txnrd3.1	8.62458e-09	0.742765	0.962	0.945	0.000217934	2	txnrd3
prps1b	8.96589e-09	0.971438	0.688	0.519	0.000226559	2	prps1b
si:dkey-256i11.2	8.98601e-09	1.57601	0.21	0.079	0.000227068	2	si:dkey-256i11.2
si:dkey-108k21.24.2	1.02779e-08	1.35381	0.145	0.043	0.000259713	2	si:dkey-108k21.24
hist1h2a3:3.2	1.04201e-08	1.80556	0.177	0.062	0.000263305	2	hist1h2a3:3
si:ch211-59o9.10	1.05101e-08	0.853917	0.699	0.503	0.000265579	2	si:ch211-59o9.10
hist1h4l:11.1	1.05365e-08	1.79671	0.097	0.021	0.000266247	2	hist1h4l:11
carm1	1.05966e-08	0.596863	0.984	0.906	0.000267765	2	carm1
cbx3a.1	1.1664e-08	0.485764	0.978	0.947	0.000294737	2	cbx3a
hcfc1b.1	1.20624e-08	0.776051	0.935	0.89	0.000304805	2	hcfc1b
kif20a.2	1.22281e-08	0.440628	0.715	0.547	0.000308992	2	kif20a
si:dkey-109l4.3.1	1.39851e-08	1.79368	0.478	0.308	0.00035339	2	si:dkey-109l4.3
cyyr1	1.43284e-08	0.863625	0.79	0.68	0.000362066	2	cyyr1
mcm10	1.69474e-08	2.20085	0.366	0.211	0.000428243	2	mcm10
men1.1	1.74744e-08	1.30859	0.602	0.431	0.000441561	2	men1
slc43a1a.1	1.80236e-08	0.780907	0.871	0.822	0.000455438	2	slc43a1a
fancd2	1.87476e-08	2.05446	0.452	0.289	0.000473732	2	fancd2
si:ch211-113a14.19:1.2	2.00721e-08	1.60202	0.124	0.034	0.000507202	2	si:ch211-113a14.19:1
fancc.1	2.07489e-08	2.76574	0.253	0.12	0.000524303	2	fancc
slc37a4b:1	2.32764e-08	5.07255	0.027	0.001	0.000588171	2	slc37a4b:1
CPNE8	2.33387e-08	1.37629	0.274	0.122	0.000589747	2	CPNE8
nbn.1	2.34604e-08	1.21844	0.376	0.21	0.000592822	2	nbn
zgc:173552.1	2.5596e-08	1.94596	0.156	0.051	0.000646785	2	zgc:173552
arl14ep.1	2.66611e-08	0.788143	0.613	0.433	0.000673698	2	arl14ep
tmx2a	2.83053e-08	0.754197	0.081	0.016	0.000715247	2	tmx2a
fam98b	3.07203e-08	1.43148	0.398	0.225	0.000776272	2	fam98b
nup107.1	3.11338e-08	0.794395	0.844	0.754	0.00078672	2	nup107
adprhl2	3.15306e-08	1.41111	0.382	0.218	0.000796747	2	adprhl2
si:dkey-57a22.11.2	3.19282e-08	1.47533	0.382	0.218	0.000806794	2	si:dkey-57a22.11
si:dkey-111k8.2	3.2329e-08	1.53557	0.376	0.211	0.000816922	2	si:dkey-111k8.2
ahctf1	3.3025e-08	1.21237	0.478	0.295	0.000834509	2	ahctf1
cd2bp2.2	3.42993e-08	0.864866	0.677	0.51	0.000866709	2	cd2bp2
znf1118:1	3.49032e-08	2.25709	0.113	0.03	0.00088197	2	znf1118:1
ctcf.1	3.59691e-08	0.692802	0.952	0.832	0.000908903	2	ctcf
nudt21.1	3.68311e-08	0.735072	0.919	0.858	0.000930685	2	nudt21
zgc:194989.1	4.0849e-08	0.551794	0.43	0.25	0.00103221	2	zgc:194989
sub1a.1	4.19508e-08	0.46964	0.978	0.955	0.00106005	2	sub1a
thop1.1	4.30516e-08	0.780243	0.817	0.75	0.00108787	2	thop1
h2az2a.2	4.42034e-08	0.510676	0.984	0.963	0.00111698	2	h2az2a
rad54b.1	4.45469e-08	2.9047	0.301	0.166	0.00112565	2	rad54b
phax.1	4.66612e-08	0.814858	0.78	0.65	0.00117908	2	phax
si:dkey-25o16.4.1	4.90367e-08	1.3639	0.489	0.32	0.00123911	2	si:dkey-25o16.4
mad2l1bp.2	5.25333e-08	1.25725	0.538	0.382	0.00132746	2	mad2l1bp
ywhaqa.1	5.56216e-08	0.510498	0.995	0.99	0.0014055	2	ywhaqa
rangap1a	5.72509e-08	0.993202	0.726	0.598	0.00144667	2	rangap1a
zgc:101540	5.79489e-08	2.73265	0.156	0.055	0.00146431	2	zgc:101540
snrpf.1	5.86857e-08	0.544132	0.984	0.924	0.00148293	2	snrpf
si:ch211-122f10.4.1	6.03306e-08	0.788356	0.634	0.466	0.00152449	2	si:ch211-122f10.4
zgc:174288.1	6.63809e-08	0.259077	0.435	0.236	0.00167738	2	zgc:174288
lin54.2	7.86372e-08	1.0639	0.661	0.519	0.00198708	2	lin54
bard1.1	8.07276e-08	2.90965	0.21	0.091	0.0020399	2	bard1
dbf4b.2	8.70865e-08	2.05171	0.285	0.146	0.00220059	2	dbf4b
rnf168	8.8069e-08	0.702931	0.769	0.635	0.00222541	2	rnf168
hist1h2a11:3.2	9.193e-08	2.34761	0.097	0.024	0.00232298	2	hist1h2a11:3
nsmce2	9.69793e-08	1.0911	0.473	0.31	0.00245057	2	nsmce2
CR847936.6	1.0487e-07	0.885816	0.511	0.318	0.00264995	2	CR847936.6
cbx2.1	1.10045e-07	0.764289	0.667	0.497	0.00278072	2	cbx2
tubgcp2.1	1.12623e-07	1.01658	0.441	0.283	0.00284588	2	tubgcp2
LSM10.1	1.16772e-07	1.89914	0.161	0.058	0.00295071	2	LSM10
kif23.2	1.17352e-07	0.631549	0.785	0.697	0.00296536	2	kif23
hells.1	1.2103e-07	0.532186	0.957	0.843	0.0030583	2	hells
smarcad1a	1.2553e-07	1.23737	0.806	0.724	0.00317202	2	smarcad1a
atg4b	1.32857e-07	0.374798	0.559	0.379	0.00335717	2	atg4b
adnp2b	1.34369e-07	0.541587	0.855	0.718	0.00339538	2	adnp2b
polr2c	1.43286e-07	0.520083	0.833	0.713	0.0036207	2	polr2c
si:dkey-7j22.4.1	1.44541e-07	2.12528	0.231	0.105	0.00365241	2	si:dkey-7j22.4
tipin.1	1.46432e-07	1.27396	0.618	0.462	0.00370018	2	tipin
si:ch73-301j1.1.1	1.53488e-07	1.21527	0.075	0.015	0.00387848	2	si:ch73-301j1.1
kcnk5a.1	1.60088e-07	1.56428	0.366	0.213	0.00404526	2	kcnk5a
zgc:112980.1	1.81424e-07	0.970243	0.651	0.508	0.00458439	2	zgc:112980
si:dkey-23a13.21	1.86692e-07	2.57607	0.059	0.01	0.00471752	2	si:dkey-23a13.21
snrpa1	1.89081e-07	0.639193	0.812	0.693	0.00477789	2	snrpa1
si:ch211-150o23.3	1.89354e-07	0.855482	0.285	0.14	0.00478479	2	si:ch211-150o23.3
rad51c	2.01293e-07	2.57947	0.194	0.082	0.00508648	2	rad51c
zgc:173552:1.1	2.09742e-07	1.37775	0.097	0.025	0.00529997	2	zgc:173552:1
aspn	2.23266e-07	3.41408	0.038	0.003	0.0056417	2	aspn
pds5b.2	2.23969e-07	0.90654	0.704	0.546	0.00565946	2	pds5b
mcph1.1	2.24827e-07	3.00826	0.156	0.057	0.00568115	2	mcph1
nudt1	2.26463e-07	1.61635	0.355	0.2	0.00572249	2	nudt1
ubr5.1	2.34779e-07	0.585072	0.801	0.644	0.00593262	2	ubr5
pa2g4b.1	2.40139e-07	0.549975	0.989	0.973	0.00606807	2	pa2g4b
lin52	2.5277e-07	1.08008	0.409	0.246	0.00638724	2	lin52
pdgfaa	2.60104e-07	1.34315	0.263	0.127	0.00657257	2	pdgfaa
ctps1b	2.65726e-07	1.75391	0.355	0.213	0.00671464	2	ctps1b
ash2l	2.68883e-07	0.654963	0.839	0.742	0.00679441	2	ash2l
snrpe.1	2.69515e-07	0.578619	0.909	0.819	0.00681039	2	snrpe
CU459186.3.1	2.79991e-07	2.61495	0.086	0.021	0.00707509	2	CU459186.3
nrp2a.2	2.82694e-07	0.32364	0.935	0.897	0.0071434	2	nrp2a
nup205	2.87407e-07	1.55666	0.602	0.499	0.00726249	2	nup205
g2e3.2	2.93817e-07	0.647202	0.634	0.458	0.00742446	2	g2e3
senp2	2.94494e-07	0.875738	0.731	0.585	0.00744158	2	senp2
xpo1a.1	2.9626e-07	0.619789	0.849	0.789	0.00748619	2	xpo1a
apex2	3.13565e-07	1.40506	0.306	0.159	0.00792348	2	apex2
si:ch211-266o15.1	3.18832e-07	0.765258	0.78	0.648	0.00805658	2	si:ch211-266o15.1
slc7a10b.1	3.19123e-07	2.74939	0.086	0.021	0.00806391	2	slc7a10b
rae1.1	3.46879e-07	0.792089	0.909	0.814	0.00876528	2	rae1
hist1h2a3.1	3.63006e-07	2.44563	0.156	0.058	0.0091728	2	hist1h2a3
CU459186.2.1	3.86408e-07	1.98029	0.124	0.039	0.00976414	2	CU459186.2
anapc1.1	4.22022e-07	1.10519	0.688	0.536	0.0106641	2	anapc1
cenpe.1	4.36278e-07	0.547592	0.608	0.436	0.0110243	2	cenpe
tspan2a	4.41902e-07	1.75479	0.452	0.312	0.0111664	2	tspan2a
nup160	4.79974e-07	1.37389	0.624	0.505	0.0121285	2	nup160
slc10a7	4.86926e-07	0.670999	0.672	0.527	0.0123041	2	slc10a7
zgc:113340.1	5.14832e-07	2.81255	0.188	0.081	0.0130093	2	zgc:113340
atrx.1	5.19409e-07	0.584547	0.978	0.953	0.0131249	2	atrx
hist1h2a3:1.1	5.2108e-07	2.49014	0.086	0.021	0.0131672	2	hist1h2a3:1
nup85	5.25207e-07	1.08445	0.602	0.456	0.0132715	2	nup85
nup188.1	5.46763e-07	1.04741	0.645	0.492	0.0138161	2	nup188
traip.1	5.60732e-07	1.71273	0.328	0.183	0.0141691	2	traip
hist1h4l:15.1	5.74364e-07	0.980961	0.129	0.042	0.0145136	2	hist1h4l:15
zgc:173552:2.2	6.00263e-07	1.60753	0.102	0.029	0.015168	2	zgc:173552:2
prdx4	6.0331e-07	0.431685	0.973	0.951	0.0152451	2	prdx4
hist1h2a5.2	6.09388e-07	1.38886	0.145	0.051	0.0153986	2	hist1h2a5
lmnb2.1	6.48745e-07	0.714388	0.871	0.792	0.0163931	2	lmnb2
slc7a3a.2	6.80785e-07	0.640431	0.715	0.568	0.0172028	2	slc7a3a
rad52.2	6.89989e-07	1.7427	0.323	0.183	0.0174353	2	rad52
si:dkey-30f3.2.2	7.74864e-07	0.996864	0.247	0.117	0.01958	2	si:dkey-30f3.2
cisd2	7.79446e-07	0.49551	0.64	0.471	0.0196958	2	cisd2
morf4l1.1	7.97542e-07	0.550221	0.973	0.954	0.0201531	2	morf4l1
sart3	8.41803e-07	0.889678	0.608	0.462	0.0212715	2	sart3
CR391944.1	8.52271e-07	0.537362	0.194	0.081	0.021536	2	CR391944.1
eif1axa	9.50957e-07	0.582529	0.823	0.767	0.0240297	2	eif1axa
igsf5a	9.65985e-07	5.31739	0.065	0.013	0.0244095	2	igsf5a
eif4a3.1	9.72637e-07	0.42856	1	0.977	0.0245776	2	eif4a3
si:ch211-107m4.1.1	1.0707e-06	0.818314	0.312	0.166	0.0270555	2	si:ch211-107m4.1
znf1133	1.12242e-06	1.37561	0.14	0.05	0.0283625	2	znf1133
si:ch211-226h8.14	1.14916e-06	10.1339	0.022	0.001	0.0290381	2	si:ch211-226h8.14
slc29a1a.1	1.1612e-06	0.363569	0.952	0.915	0.0293423	2	slc29a1a
CU457819.4.1	1.18098e-06	2.41092	0.081	0.02	0.0298423	2	CU457819.4
lbx1b	1.18678e-06	9.73423	0.016	0	0.0299888	2	lbx1b
rabgap1l2	1.18678e-06	6.48241	0.016	0	0.0299888	2	rabgap1l2
si:dkey-187i8.2	1.18678e-06	6.81945	0.016	0	0.0299888	2	si:dkey-187i8.2
CR855257.2	1.18678e-06	8.69468	0.016	0	0.0299888	2	CR855257.2
plppr5b	1.18974e-06	3.03123	0.022	0.001	0.0300635	2	plppr5b
naa40	1.19505e-06	0.665258	0.855	0.769	0.0301978	2	naa40
prmt1.1	1.24919e-06	0.405919	1	0.992	0.0315658	2	prmt1
orc1	1.25277e-06	1.61763	0.543	0.393	0.0316562	2	orc1
ldhba.2	1.26382e-06	0.585325	0.935	0.91	0.0319354	2	ldhba
creb1a	1.27374e-06	0.659355	0.796	0.685	0.0321862	2	creb1a
si:dkey-4e4.1	1.32508e-06	1.76218	0.081	0.02	0.0334835	2	si:dkey-4e4.1
sept15.2	1.37305e-06	0.506625	0.914	0.868	0.0346956	2	2024-09-15
ebp.1	1.3909e-06	1.80648	0.376	0.243	0.0351466	2	ebp
mybl2a	1.39611e-06	0.860688	0.559	0.399	0.0352783	2	mybl2a
faap24.1	1.48517e-06	2.08563	0.145	0.055	0.0375288	2	faap24
si:ch211-282k23.2.2	1.58143e-06	1.6228	0.172	0.072	0.0399611	2	si:ch211-282k23.2
CR847936.1	1.59449e-06	0.83479	0.484	0.32	0.0402913	2	CR847936.1
cirbpa.1	1.60044e-06	0.30184	1	0.999	0.0404416	2	cirbpa
morc2	1.64133e-06	0.602576	0.715	0.55	0.0414747	2	morc2
ddx39aa.1	1.68208e-06	0.434896	1	0.99	0.0425046	2	ddx39aa
polr2d	1.68459e-06	0.39333	0.828	0.672	0.0425679	2	polr2d
ssna1	1.68715e-06	1.56457	0.387	0.259	0.0426325	2	ssna1
ipo7	1.70462e-06	0.489419	0.968	0.933	0.0430741	2	ipo7
smpd5	1.71665e-06	1.12755	0.29	0.15	0.0433781	2	smpd5
zgc:171759:4.1	1.77264e-06	0.749397	0.28	0.142	0.0447929	2	zgc:171759:4
zgc:174703	1.81915e-06	2.494	0.113	0.037	0.045968	2	zgc:174703
dkc1.1	1.84601e-06	0.784136	0.946	0.856	0.0466468	2	dkc1
ctdp1	1.85763e-06	2.07605	0.355	0.224	0.0469404	2	ctdp1
zgc:77287	1.89685e-06	1.24625	0.409	0.264	0.0479315	2	zgc:77287
ms4a17a.9.2	1.92096e-06	0.469629	0.989	0.977	0.0485408	2	ms4a17a.9
NUP85	1.93118e-06	1.1163	0.516	0.381	0.0487991	2	NUP85
nup50	2.01303e-06	0.677621	0.876	0.841	0.0508672	2	nup50
dhx15.1	2.1254e-06	0.487596	0.968	0.964	0.0537067	2	dhx15
cdk11b	2.14327e-06	0.632354	0.683	0.533	0.0541584	2	cdk11b
si:ch211-66k16.27.1	2.15011e-06	0.990917	0.608	0.488	0.054331	2	si:ch211-66k16.27
smarcal1.1	2.26724e-06	1.64278	0.339	0.202	0.0572909	2	smarcal1
nitr5.2	2.33258e-06	0.932327	0.108	0.034	0.058942	2	nitr5
zgc:110249	2.33901e-06	0.471874	0.247	0.12	0.0591044	2	zgc:110249
srsf3a.1	2.34965e-06	0.503058	0.919	0.81	0.0593734	2	srsf3a
si:ch211-271g18.4	2.36818e-06	2.58177	0.118	0.041	0.0598415	2	si:ch211-271g18.4
zgc:85936	2.38492e-06	1.432	0.43	0.28	0.0602646	2	zgc:85936
si:dkey-92f12.2.1	2.51192e-06	1.22805	0.328	0.187	0.0634738	2	si:dkey-92f12.2
jpt2.1	2.52013e-06	0.361093	1	0.999	0.0636811	2	jpt2
or115-11.2	2.54196e-06	0.778281	0.269	0.132	0.0642327	2	or115-11
mindy3	2.55669e-06	1.4706	0.355	0.216	0.064605	2	mindy3
puf60a.1	2.59336e-06	0.416003	0.995	0.958	0.0655317	2	puf60a
aifm1	2.62869e-06	1.16887	0.613	0.458	0.0664243	2	aifm1
ddx39ab.2	2.81772e-06	0.37247	0.995	0.987	0.0712011	2	ddx39ab
si:ch211-51h9.7	2.84488e-06	1.53929	0.29	0.158	0.0718874	2	si:ch211-51h9.7
eef1b2.1	3.05769e-06	0.352622	1	1	0.0772647	2	eef1b2
tsen2	3.1913e-06	1.68334	0.183	0.08	0.0806411	2	tsen2
xpo7	3.20884e-06	1.44366	0.28	0.15	0.0810841	2	xpo7
grsf1	3.23333e-06	1.27381	0.468	0.325	0.081703	2	grsf1
zgc:174906	3.27151e-06	1.64796	0.382	0.24	0.0826678	2	zgc:174906
parp2	3.30941e-06	1.15817	0.608	0.488	0.0836254	2	parp2
ttk.2	3.46536e-06	0.708084	0.742	0.648	0.0875662	2	ttk
uchl5	3.46758e-06	0.625706	0.747	0.635	0.0876222	2	uchl5
arsg	3.50591e-06	1.98339	0.194	0.09	0.0885908	2	arsg
eri2.1	3.57587e-06	1.32741	0.441	0.306	0.0903587	2	eri2
FQ312024.1.1	3.63567e-06	3.2685	0.113	0.038	0.0918698	2	FQ312024.1
pask	3.74915e-06	2.36059	0.253	0.138	0.0947374	2	pask
cnot9.1	3.83829e-06	0.570539	0.941	0.847	0.0969896	2	cnot9
tdp1.1	3.87771e-06	1.55539	0.349	0.224	0.0979858	2	tdp1
phip	3.92175e-06	1.02466	0.581	0.453	0.0990986	2	phip
cdca7b.1	3.94829e-06	0.69063	0.769	0.653	0.0997694	2	cdca7b
HAPLN1.3	2.45881e-127	6.48181	0.58	0.036	6.21318e-123	3	HAPLN1
mlnl.3	2.64098e-121	4.8009	0.733	0.09	6.6735e-117	3	mlnl
si:dkey-163f12.11.3	1.88766e-119	7.54548	0.96	0.309	4.76993e-115	3	si:dkey-163f12.11
hapln1b.2	8.31277e-118	6.01904	0.864	0.172	2.10055e-113	3	hapln1b
id2b.2	2.75971e-103	6.67062	0.994	0.579	6.9735e-99	3	id2b
chl1a.3	4.7585e-101	6.37991	0.92	0.316	1.20242e-96	3	chl1a
f8.3	1.69326e-94	8.26908	0.915	0.328	4.2787e-90	3	f8
krt94.2	3.10395e-94	5.88011	1	0.668	7.84337e-90	3	krt94
icn.3	3.25279e-94	5.92886	0.972	0.605	8.21947e-90	3	icn
krt93.2	1.24547e-93	6.1668	0.477	0.037	3.14717e-89	3	krt93
gata5.3	5.59171e-91	8.04299	0.972	0.535	1.41297e-86	3	gata5
slc6a4a.3	9.21482e-91	8.07153	0.602	0.084	2.32849e-86	3	slc6a4a
bmp3.2	3.43641e-86	4.65271	0.92	0.397	8.68346e-82	3	bmp3
fn1a.2	2.76804e-85	5.72557	0.977	0.585	6.99455e-81	3	fn1a
rpz5.3	1.84046e-79	5.99353	0.875	0.35	4.65065e-75	3	rpz5
igdcc3.2	2.67944e-76	6.30534	0.767	0.226	6.77069e-72	3	igdcc3
SERF2.2	1.00113e-74	3.54868	0.932	0.483	2.52975e-70	3	SERF2
zgc:136858.2	1.2402e-74	5.72649	0.676	0.155	3.13387e-70	3	zgc:136858
prkcbb.2	1.44075e-73	5.41306	0.864	0.396	3.64063e-69	3	prkcbb
ece1.1	6.47757e-72	2.89498	1	0.952	1.63682e-67	3	ece1
plcd1a.2	3.91443e-66	5.32999	0.875	0.439	9.89138e-62	3	plcd1a
wnt11.2	5.90123e-66	6.22217	0.886	0.487	1.49118e-61	3	wnt11
adcy2b.1	4.32262e-65	2.91627	0.989	0.976	1.09228e-60	3	adcy2b
tgm2b.2	6.50844e-64	5.26582	0.932	0.567	1.64462e-59	3	tgm2b
tbx20.2	2.92987e-63	5.5007	0.733	0.235	7.4035e-59	3	tbx20
si:ch211-119e14.1.2	1.12704e-62	3.33736	0.778	0.27	2.84791e-58	3	si:ch211-119e14.1
ace.1	5.4019e-62	4.88416	0.909	0.531	1.36501e-57	3	ace
cabp5a.3	1.91829e-61	7.45254	0.83	0.42	4.84733e-57	3	cabp5a
glulb.3	5.94513e-61	3.24629	1	0.991	1.50228e-56	3	glulb
gata4.2	5.12801e-60	5.28253	0.608	0.152	1.2958e-55	3	gata4
drl.2	1.9175e-59	6.14037	0.358	0.036	4.84533e-55	3	drl
edn1.2	1.11137e-58	5.66208	0.938	0.623	2.80832e-54	3	edn1
krt8.2	1.91161e-57	1.12564	1	1	4.83045e-53	3	krt8
mgst1.2.3	6.5901e-57	6.99484	0.619	0.174	1.66525e-52	3	mgst1.2
srgn.2	4.10616e-56	1.3916	1	0.996	1.03759e-51	3	srgn
p2rx1.1	4.14526e-55	3.45527	0.892	0.531	1.04746e-50	3	p2rx1
ephb2b.2	1.06458e-54	6.62291	0.517	0.112	2.69009e-50	3	ephb2b
sdc2.1	1.12117e-52	2.24233	0.955	0.675	2.83309e-48	3	sdc2
fth1a.2	1.7771e-52	1.33675	1	1	4.49055e-48	3	fth1a
si:ch211-71m22.1.2	2.53246e-52	2.15156	0.966	0.743	6.39928e-48	3	si:ch211-71m22.1
CABZ01032906.1.2	2.81269e-52	6.4536	0.193	0.005	7.10739e-48	3	CABZ01032906.1
drll.2.1	3.65092e-52	4.92252	0.312	0.03	9.2255e-48	3	drll.2
lrmp.2	4.07232e-52	5.25652	0.847	0.425	1.02903e-47	3	lrmp
igf2b.1	2.144e-51	2.65945	0.983	0.827	5.41768e-47	3	igf2b
gas2l1.2	4.14453e-51	6.59549	0.528	0.127	1.04728e-46	3	gas2l1
rhoua.1	5.96691e-51	3.22075	0.852	0.448	1.50778e-46	3	rhoua
lpar1.1	1.20541e-50	2.52352	0.949	0.776	3.04594e-46	3	lpar1
calcrla.2	8.12537e-50	1.87064	1	0.998	2.0532e-45	3	calcrla
sh3bgrl3.1	1.13813e-49	1.61093	1	0.993	2.87594e-45	3	sh3bgrl3
has2.2	4.33113e-49	5.268	0.489	0.105	1.09443e-44	3	has2
cavin2b.2	6.05166e-49	1.99784	1	0.963	1.5292e-44	3	cavin2b
si:ch211-222l21.1.3	8.01623e-49	1.26882	1	1	2.02562e-44	3	si:ch211-222l21.1
nkain4.2	5.21211e-48	2.65998	0.898	0.621	1.31705e-43	3	nkain4
f2r.2	1.23145e-47	3.00402	0.875	0.524	3.11175e-43	3	f2r
zgc:64106	1.69375e-47	2.76617	0.92	0.729	4.27995e-43	3	zgc:64106
nid1b.1	1.15624e-46	1.92299	1	0.969	2.9217e-42	3	nid1b
arrdc3b.2	2.76286e-46	2.58807	0.972	0.827	6.98146e-42	3	arrdc3b
s100a10b.2	6.51084e-46	3.78753	0.898	0.607	1.64522e-41	3	s100a10b
cd82a.3	8.92995e-46	2.92429	0.92	0.735	2.25651e-41	3	cd82a
ahnak.1	1.46842e-45	1.95579	0.994	0.948	3.71055e-41	3	ahnak
gata6.1	3.07968e-45	4.62636	0.648	0.227	7.78205e-41	3	gata6
add3a.1	5.42094e-45	1.79682	1	0.982	1.36982e-40	3	add3a
dnah1.2	2.47019e-44	7.48815	0.369	0.06	6.24193e-40	3	dnah1
klhl4.1	4.12323e-44	1.70221	1	0.968	1.0419e-39	3	klhl4
slit3.2	8.31723e-44	2.11216	0.977	0.755	2.10168e-39	3	slit3
dcn.1	1.42919e-43	3.31235	0.892	0.655	3.61141e-39	3	dcn
slit2.2	4.86756e-43	2.75921	0.83	0.421	1.22998e-38	3	slit2
sytl4.1	6.57634e-43	6.57631	0.432	0.089	1.66178e-38	3	sytl4
bmpr1ab.1	2.15789e-42	2.9437	0.841	0.469	5.45278e-38	3	bmpr1ab
cyp1b1.1	2.46657e-42	8.45469	0.642	0.236	6.23278e-38	3	cyp1b1
smad6a.1	3.64395e-42	2.66159	0.96	0.754	9.20789e-38	3	smad6a
elavl4.1	4.12626e-42	6.26765	0.438	0.099	1.04267e-37	3	elavl4
meis1b.2	1.07247e-41	2.73244	0.909	0.679	2.71003e-37	3	meis1b
ctsk.2	2.17798e-41	2.26193	0.949	0.779	5.50354e-37	3	ctsk
ptges.1	3.00683e-41	3.83194	0.523	0.144	7.59796e-37	3	ptges
zgc:66433.2	8.48673e-41	1.96761	0.943	0.711	2.14451e-36	3	zgc:66433
krt18a.1.2	1.48262e-39	0.808953	1	1	3.74643e-35	3	krt18a.1
edn2.1	2.04085e-39	5.01804	0.932	0.674	5.15702e-35	3	edn2
hdr.1	2.15326e-39	5.06771	0.438	0.106	5.44106e-35	3	hdr
clic2.1	3.34709e-39	2.51876	0.96	0.793	8.45775e-35	3	clic2
ctdspla.1	5.38303e-39	1.97985	0.955	0.806	1.36024e-34	3	ctdspla
rbfox3a.1	8.11601e-39	6.64445	0.449	0.111	2.05083e-34	3	rbfox3a
CR376783.1.1	2.2802e-38	8.54256	0.312	0.049	5.76183e-34	3	CR376783.1
adgrg6.1	1.01743e-37	3.00217	0.733	0.367	2.57093e-33	3	adgrg6
cyp26b1.2	1.18664e-37	3.06384	0.966	0.8	2.99852e-33	3	cyp26b1
drll.1.1	1.3493e-37	4.42776	0.301	0.045	3.40955e-33	3	drll.1
atp2a3.2	4.28752e-37	5.32521	0.472	0.132	1.08341e-32	3	atp2a3
gpc4.1	6.63691e-37	2.71276	0.869	0.568	1.67708e-32	3	gpc4
fstl1b.1	2.51942e-36	1.23466	1	1	6.36633e-32	3	fstl1b
fut8a.1	2.65749e-36	2.17081	0.983	0.928	6.7152e-32	3	fut8a
fam107b.2	6.941e-36	1.33034	1	0.988	1.75392e-31	3	fam107b
mmp11b.2	1.5778e-35	4.08931	0.597	0.23	3.98694e-31	3	mmp11b
mmrn2a.2	2.56764e-35	2.26236	0.989	0.957	6.48817e-31	3	mmrn2a
pdlim1.1	6.39911e-35	1.60247	1	0.962	1.61699e-30	3	pdlim1
bmp10.2	2.99632e-34	8.80576	0.278	0.043	7.5714e-30	3	bmp10
spock3.2	8.50094e-34	1.19939	1	0.986	2.1481e-29	3	spock3
gp1bb.1	1.07186e-33	7.45409	0.352	0.075	2.70847e-29	3	gp1bb
hs6st1b.2	1.16216e-33	2.44163	0.739	0.391	2.93667e-29	3	hs6st1b
map2k1.2	1.74643e-33	3.04977	0.665	0.318	4.41305e-29	3	map2k1
myl9b.1	3.02243e-33	1.3927	1	0.991	7.63738e-29	3	myl9b
anxa2a.1	3.77001e-33	7.48214	0.716	0.351	9.52643e-29	3	anxa2a
got1.1	7.25288e-33	3.16878	0.881	0.636	1.83273e-28	3	got1
slc12a7b.2	1.16953e-32	1.98046	0.938	0.815	2.95528e-28	3	slc12a7b
hacd3.2	1.22097e-32	2.84604	0.847	0.635	3.08528e-28	3	hacd3
tmem88b	1.27352e-32	1.61377	1	0.993	3.21805e-28	3	tmem88b
si:ch211-14k19.8.1	1.87516e-32	1.34558	1	1	4.73834e-28	3	si:ch211-14k19.8
plscr3b.2	7.95037e-32	1.31564	0.989	0.97	2.00898e-27	3	plscr3b
LRATD2.3	2.5855e-31	1.83335	0.915	0.802	6.5333e-27	3	LRATD2
cthrc1a.1	2.62447e-31	2.39309	0.932	0.779	6.63179e-27	3	cthrc1a
plod2.1	4.1884e-31	5.30507	0.33	0.068	1.05837e-26	3	plod2
cgnl1.2	8.97371e-31	1.1201	1	0.992	2.26757e-26	3	cgnl1
zfpm1.1	7.35326e-30	2.14551	0.881	0.701	1.85809e-25	3	zfpm1
acsbg2.1	7.38568e-30	1.29701	1	0.988	1.86629e-25	3	acsbg2
dipk2b.3	8.1082e-30	1.46797	0.972	0.943	2.04886e-25	3	dipk2b
arhgap20b	3.84228e-29	3.06886	0.517	0.191	9.70905e-25	3	arhgap20b
si:dkey-31f5.11.1	5.52708e-29	3.45422	0.557	0.227	1.39664e-24	3	si:dkey-31f5.11
lpar2b.1	8.36206e-29	2.54119	0.841	0.665	2.11301e-24	3	lpar2b
bmpr1aa.1	1.17888e-28	1.64763	0.909	0.702	2.97891e-24	3	bmpr1aa
vap.1	1.20986e-28	1.34727	0.943	0.808	3.0572e-24	3	vap
wu:fc75a09.1	1.5989e-28	3.82891	0.506	0.189	4.04025e-24	3	wu:fc75a09
sdk1a.1	1.9252e-28	3.62135	0.466	0.158	4.86478e-24	3	sdk1a
si:dkey-238c7.16.1	2.45777e-28	2.45651	0.801	0.56	6.21054e-24	3	si:dkey-238c7.16
si:dkey-93m18.3.1	2.77533e-28	2.20643	0.438	0.126	7.01299e-24	3	si:dkey-93m18.3
rab11fip4a.2	6.60595e-28	5.88747	0.199	0.024	1.66926e-23	3	rab11fip4a
smad6b.1	6.78108e-28	2.80104	0.875	0.682	1.71351e-23	3	smad6b
efnb3b.1	7.65674e-28	3.60654	0.477	0.169	1.93478e-23	3	efnb3b
tlr20.3:1.1	1.16217e-27	9.0194	0.102	0.003	2.93668e-23	3	tlr20.3:1
errfi1a.2	1.24265e-27	3.89959	0.801	0.536	3.14006e-23	3	errfi1a
lrrc58b.1	2.17491e-27	2.32962	0.716	0.408	5.49578e-23	3	lrrc58b
grin2bb	2.23669e-27	4.79971	0.307	0.07	5.65189e-23	3	grin2bb
gpm6ab.2	2.268e-27	2.18707	0.989	0.954	5.73102e-23	3	gpm6ab
CR749775.3.1	2.41174e-27	7.70346	0.097	0.002	6.09423e-23	3	CR749775.3
drll.3.2	2.86615e-27	5.16567	0.193	0.024	7.24248e-23	3	drll.3
gng13b.1	3.94215e-27	5.04867	0.375	0.105	9.96141e-23	3	gng13b
aldh2.2.1	4.82247e-27	1.52458	0.932	0.749	1.21859e-22	3	aldh2.2
lfng.2	1.09524e-26	1.20584	1	1	2.76756e-22	3	lfng
p3h2.1	1.88572e-26	3.0899	0.801	0.559	4.76502e-22	3	p3h2
kctd12.2.1	3.34587e-26	2.10795	0.847	0.621	8.45468e-22	3	kctd12.2
nfatc1.3	3.41772e-26	2.58631	0.79	0.531	8.63623e-22	3	nfatc1
wipf3.1	3.80412e-26	1.54282	0.858	0.579	9.61262e-22	3	wipf3
arl4aa.2	4.43809e-26	1.47204	0.938	0.902	1.12146e-21	3	arl4aa
pde9a.1	4.56332e-26	6.92384	0.29	0.063	1.15311e-21	3	pde9a
bmp16.1	5.94312e-26	2.03865	0.96	0.887	1.50177e-21	3	bmp16
wnk1b	7.9893e-26	3.23548	0.636	0.315	2.01882e-21	3	wnk1b
si:dkey-172h23.2.1	8.50889e-26	2.77499	0.653	0.321	2.15011e-21	3	si:dkey-172h23.2
creb3l3b.1	1.01851e-25	8.62501	0.216	0.034	2.57366e-21	3	creb3l3b
lmo4a	1.04758e-25	0.902075	1	1	2.64712e-21	3	lmo4a
zfp36l1b.2	1.76653e-25	1.06003	1	0.997	4.46385e-21	3	zfp36l1b
eps8a.1	1.97405e-25	2.72769	0.54	0.223	4.98822e-21	3	eps8a
zgc:110626.2	2.40403e-25	1.34642	0.972	0.924	6.07473e-21	3	zgc:110626
ramp2.3	2.84653e-25	0.716799	1	1	7.19288e-21	3	ramp2
anks1b.1	3.48424e-25	1.58533	0.977	0.849	8.80433e-21	3	anks1b
aplnra.2	5.69481e-25	0.920422	1	0.999	1.43902e-20	3	aplnra
quo.1	6.17394e-25	5.0286	0.472	0.19	1.56009e-20	3	quo
adamts6.1	9.27286e-25	5.4492	0.17	0.02	2.34316e-20	3	adamts6
doc2b.1	1.02363e-24	2.53055	0.392	0.12	2.58661e-20	3	doc2b
cd63.1	1.31671e-24	0.689981	1	1	3.3272e-20	3	cd63
lrfn4b.1	1.33964e-24	3.95198	0.386	0.121	3.38513e-20	3	lrfn4b
emilin2a.1	1.89171e-24	2.21313	0.801	0.526	4.78015e-20	3	emilin2a
hand2.1	1.98091e-24	6.97724	0.614	0.309	5.00556e-20	3	hand2
adarb1a.1	2.53321e-24	8.21311	0.307	0.077	6.40116e-20	3	adarb1a
mylka.1	5.33554e-24	5.4368	0.352	0.105	1.34824e-19	3	mylka
serpinf1.2	5.5752e-24	1.49587	0.96	0.853	1.4088e-19	3	serpinf1
ksr1b.1	1.03155e-23	1.98293	0.852	0.688	2.60662e-19	3	ksr1b
zgc:162879.1	1.07821e-23	3.28731	0.222	0.038	2.72452e-19	3	zgc:162879
akap12b.2	1.10419e-23	1.19565	1	0.998	2.79018e-19	3	akap12b
tnfaip8l3.1	1.12366e-23	8.90474	0.153	0.016	2.83939e-19	3	tnfaip8l3
vill	1.76939e-23	5.18302	0.119	0.008	4.47106e-19	3	vill
gas6.2	2.73665e-23	1.40084	1	0.99	6.91524e-19	3	gas6
si:ch73-1a9.3.2	3.85542e-23	0.893449	1	0.999	9.74225e-19	3	si:ch73-1a9.3
itga9.3	4.52656e-23	1.42478	0.943	0.84	1.14382e-18	3	itga9
ppp2r3a.1	5.32482e-23	3.13041	0.409	0.135	1.34553e-18	3	ppp2r3a
srpx.1	8.98798e-23	2.46613	0.835	0.684	2.27117e-18	3	srpx
spns2.1	9.78616e-23	1.31321	1	0.998	2.47286e-18	3	spns2
pcdh10a	1.20417e-22	5.86381	0.511	0.236	3.04282e-18	3	pcdh10a
sept9a.2	1.55587e-22	1.15051	1	0.976	3.93152e-18	3	sept9a
rhoca.2	2.26795e-22	0.778234	1	1	5.73088e-18	3	rhoca
ackr3b.3	2.31333e-22	2.54217	0.835	0.694	5.84555e-18	3	ackr3b
crlf3.1	5.47797e-22	1.55068	0.943	0.804	1.38423e-17	3	crlf3
zgc:100829.1	8.1794e-22	1.10033	0.994	0.98	2.06685e-17	3	zgc:100829
dhrs13a.3.1	8.76372e-22	1.48419	0.898	0.73	2.2145e-17	3	dhrs13a.3
dip2ba	1.12399e-21	2.08705	0.784	0.554	2.84021e-17	3	dip2ba
zcchc24.1	1.22152e-21	1.32663	0.977	0.94	3.08666e-17	3	zcchc24
tmem88a.1	3.7553e-21	1.02563	1	1	9.48926e-17	3	tmem88a
pam.1	4.09446e-21	2.20087	0.875	0.741	1.03463e-16	3	pam
smad9	5.18434e-21	2.64566	0.761	0.556	1.31003e-16	3	smad9
cdh6.1	5.22974e-21	1.92983	0.875	0.705	1.3215e-16	3	cdh6
oaz1a.2	5.98347e-21	0.661913	1	1	1.51196e-16	3	oaz1a
thbs3b	6.25038e-21	3.17898	0.625	0.344	1.57941e-16	3	thbs3b
thpo.1	8.46415e-21	4.59998	0.227	0.048	2.13881e-16	3	thpo
ssh1a	1.03856e-20	3.15534	0.341	0.105	2.62433e-16	3	ssh1a
anxa11a.1	1.24101e-20	1.16055	0.994	0.979	3.13591e-16	3	anxa11a
slc29a1b.1	2.14695e-20	3.65092	0.739	0.579	5.42513e-16	3	slc29a1b
selenow1.2	2.17879e-20	0.868436	1	0.997	5.50559e-16	3	selenow1
sall1a.2	2.75754e-20	6.35149	0.295	0.085	6.96803e-16	3	sall1a
efna3b.1	2.95133e-20	2.28835	0.585	0.306	7.4577e-16	3	efna3b
marcksl1b	3.4728e-20	0.607074	1	1	8.77542e-16	3	marcksl1b
urp1.1	3.91425e-20	2.34068	0.398	0.143	9.89091e-16	3	urp1
plpp2a.2	5.03335e-20	1.09909	0.955	0.888	1.27188e-15	3	plpp2a
slc24a3	1.24053e-19	5.741	0.148	0.02	3.13469e-15	3	slc24a3
tlr5b.1	1.54289e-19	1.94114	0.795	0.586	3.89874e-15	3	tlr5b
ndrg2.1	1.68702e-19	1.54652	0.858	0.7	4.26294e-15	3	ndrg2
hmgn2.1	1.72799e-19	0.824994	1	1	4.36645e-15	3	hmgn2
hyal2b.2	1.87656e-19	1.94184	0.864	0.719	4.74188e-15	3	hyal2b
mlf1.1	2.22649e-19	5.51226	0.21	0.044	5.62612e-15	3	mlf1
hs6st3a	2.39775e-19	3.74179	0.21	0.043	6.05886e-15	3	hs6st3a
bmp6.1	2.42149e-19	2.31458	0.756	0.551	6.11887e-15	3	bmp6
ctbp1.1	4.08183e-19	1.33121	0.972	0.954	1.03144e-14	3	ctbp1
gpr182.2	4.7551e-19	0.932665	1	1	1.20157e-14	3	gpr182
zeb2b.1	5.5867e-19	3.25782	0.307	0.093	1.4117e-14	3	zeb2b
flna.1	5.87531e-19	1.00493	1	0.997	1.48463e-14	3	flna
mxra8a.1	6.27993e-19	4.88575	0.284	0.081	1.58687e-14	3	mxra8a
fkbp7.2	7.07454e-19	2.01885	0.597	0.323	1.78767e-14	3	fkbp7
gypc.1	1.04098e-18	1.09293	0.96	0.917	2.63046e-14	3	gypc
kdm6bb.1	1.0948e-18	1.73133	0.932	0.874	2.76644e-14	3	kdm6bb
mapkapk3.1	1.48126e-18	2.1708	0.693	0.429	3.74298e-14	3	mapkapk3
arhgap21a.1	1.70039e-18	2.78471	0.386	0.142	4.29671e-14	3	arhgap21a
ntrk3a	2.02363e-18	8.05319	0.273	0.077	5.11351e-14	3	ntrk3a
sema3aa.1	2.52671e-18	4.21109	0.358	0.127	6.38473e-14	3	sema3aa
si:dkey-163f12.10	4.20296e-18	9.05202	0.062	0.001	1.06204e-13	3	si:dkey-163f12.10
p2ry13.2	4.44706e-18	6.38698	0.239	0.061	1.12373e-13	3	p2ry13
sept12.1	6.36044e-18	1.13209	0.989	0.995	1.60722e-13	3	2024-09-12
ftr82.2	6.604e-18	0.870681	1	0.974	1.66877e-13	3	ftr82
smad7	8.74654e-18	1.31147	0.892	0.804	2.21016e-13	3	smad7
foxc1b.1	9.15493e-18	3.45246	0.449	0.207	2.31336e-13	3	foxc1b
icam3.1	9.60287e-18	1.3603	0.58	0.309	2.42655e-13	3	icam3
dhrs12.1	9.98138e-18	1.34316	0.932	0.861	2.5222e-13	3	dhrs12
pcdh11	1.12962e-17	6.78575	0.165	0.029	2.85444e-13	3	pcdh11
fnbp1b	1.14636e-17	1.9198	0.517	0.255	2.89675e-13	3	fnbp1b
fzd5.2	1.21695e-17	3.33303	0.318	0.105	3.07512e-13	3	fzd5
pfn2.2	1.99977e-17	0.751593	1	1	5.05321e-13	3	pfn2
nrg2a	2.39813e-17	7.89422	0.131	0.018	6.05983e-13	3	nrg2a
nrp1a.2	2.46418e-17	1.36466	0.852	0.735	6.22673e-13	3	nrp1a
sgsm3.2	2.4801e-17	3.21969	0.523	0.268	6.26696e-13	3	sgsm3
si:dkey-90l8.3.1	2.89727e-17	5.63392	0.193	0.042	7.32111e-13	3	si:dkey-90l8.3
lgals3b.1	2.92612e-17	1.20311	0.966	0.929	7.39402e-13	3	lgals3b
thbd.1	2.94469e-17	2.01215	0.625	0.375	7.44093e-13	3	thbd
si:dkey-7j14.6.2	3.87424e-17	1.02562	0.983	0.963	9.78983e-13	3	si:dkey-7j14.6
CABZ01032488.1.1	4.57737e-17	1.2975	0.767	0.55	1.15666e-12	3	CABZ01032488.1
tspo.2	4.68645e-17	1.33476	0.903	0.789	1.18422e-12	3	tspo
nfe2l2a	5.10748e-17	1.25818	0.892	0.799	1.29061e-12	3	nfe2l2a
ccnd1	5.17304e-17	1.09697	1	0.989	1.30717e-12	3	ccnd1
gbx2.1	5.72483e-17	4.81781	0.33	0.119	1.44661e-12	3	gbx2
amigo3.1	8.86823e-17	1.9871	0.619	0.381	2.24091e-12	3	amigo3
arhgap36.1	1.21288e-16	1.93566	0.585	0.322	3.06482e-12	3	arhgap36
tspan13b.2	1.35983e-16	2.73787	0.597	0.383	3.43614e-12	3	tspan13b
fstl1a.1	2.01012e-16	3.24559	0.5	0.268	5.07937e-12	3	fstl1a
2024-03-08	2.11297e-16	1.46588	0.659	0.403	5.33926e-12	3	2024-03-08
mfge8b.1	2.2392e-16	1.33435	0.46	0.211	5.65824e-12	3	mfge8b
rab13.2	2.37561e-16	1.30681	0.909	0.82	6.00292e-12	3	rab13
myct1a	3.86853e-16	1.15548	0.983	0.991	9.7754e-12	3	myct1a
si:ch73-299h12.3.1	5.02136e-16	2.59144	0.341	0.126	1.26885e-11	3	si:ch73-299h12.3
ap3b1a.1	5.66714e-16	1.40698	0.841	0.683	1.43203e-11	3	ap3b1a
fzd4.1	7.97005e-16	0.946076	0.926	0.798	2.01395e-11	3	fzd4
wnt9b.1	8.86297e-16	7.8642	0.199	0.048	2.23958e-11	3	wnt9b
mical2a.1	1.02691e-15	3.99975	0.239	0.068	2.59489e-11	3	mical2a
si:ch73-160i9.3:1	1.46864e-15	4.14969	0.335	0.13	3.7111e-11	3	si:ch73-160i9.3:1
klf12b.1	1.48392e-15	1.6884	0.472	0.228	3.74971e-11	3	klf12b
trim2a	1.58969e-15	6.70909	0.114	0.015	4.017e-11	3	trim2a
tmem176.3	1.59899e-15	0.910515	0.966	0.883	4.04048e-11	3	tmem176
wdr17.1	1.61321e-15	4.28976	0.199	0.048	4.07642e-11	3	wdr17
efnb3a.1	1.64788e-15	1.95454	0.42	0.192	4.16404e-11	3	efnb3a
si:dkeyp-97a10.2.1	1.66753e-15	0.786065	1	0.999	4.21369e-11	3	si:dkeyp-97a10.2
grb10a.2	1.778e-15	0.991678	0.994	0.98	4.49284e-11	3	grb10a
si:dkey-238i5.2	1.95902e-15	5.12692	0.131	0.02	4.95025e-11	3	si:dkey-238i5.2
efna1b.2	3.04432e-15	1.02523	0.994	0.975	7.69269e-11	3	efna1b
FP102018.1	3.59904e-15	7.69735	0.199	0.05	9.09441e-11	3	FP102018.1
zeb2a.1	3.89427e-15	2.91901	0.494	0.254	9.84043e-11	3	zeb2a
pimr80	4.09871e-15	4.40782	0.085	0.007	1.0357e-10	3	pimr80
tiam1a.2	4.74745e-15	3.28748	0.665	0.457	1.19963e-10	3	tiam1a
msna.3	5.72618e-15	0.452612	1	1	1.44695e-10	3	msna
rcan1a.1	6.09558e-15	1.25347	0.994	0.962	1.54029e-10	3	rcan1a
arl4ab.2	7.88235e-15	1.03871	0.989	0.986	1.99179e-10	3	arl4ab
egln1b	8.75079e-15	1.48946	0.699	0.475	2.21124e-10	3	egln1b
kcnh4b.1	1.15132e-14	8.30107	0.153	0.031	2.90927e-10	3	kcnh4b
si:ch211-253p2.2	1.65326e-14	6.95239	0.091	0.01	4.17761e-10	3	si:ch211-253p2.2
grb7	1.79237e-14	6.34303	0.04	0	4.52915e-10	3	grb7
adgrl2a.1	2.05864e-14	3.37903	0.222	0.062	5.20197e-10	3	adgrl2a
nr2f1a.2	2.06768e-14	0.850885	1	0.99	5.22481e-10	3	nr2f1a
LO018106.1.1	2.109e-14	5.99038	0.085	0.008	5.32923e-10	3	LO018106.1
arhgef18a.1	2.19762e-14	3.55663	0.153	0.031	5.55317e-10	3	arhgef18a
si:ch211-145b13.6.2	2.27829e-14	0.776988	1	0.997	5.75701e-10	3	si:ch211-145b13.6
mmrn2b.1	2.4987e-14	1.02704	0.966	0.929	6.31397e-10	3	mmrn2b
yap1.1	2.60236e-14	1.3948	0.92	0.856	6.5759e-10	3	yap1
calua.2	2.75393e-14	0.708974	1	0.999	6.95891e-10	3	calua
pcdh9	2.94097e-14	6.75889	0.165	0.037	7.43153e-10	3	pcdh9
F2R.1	3.35982e-14	0.967319	0.926	0.747	8.48993e-10	3	F2R
cmbl.1	5.35861e-14	2.11381	0.659	0.484	1.35407e-09	3	cmbl
fibinb	5.94777e-14	2.55592	0.341	0.136	1.50294e-09	3	fibinb
si:ch73-281n10.2.3	7.29121e-14	0.787749	1	0.999	1.84242e-09	3	si:ch73-281n10.2
nbeaa.1	9.52737e-14	5.01856	0.182	0.044	2.40747e-09	3	nbeaa
si:ch211-74m13.1.1	1.15721e-13	0.999592	0.915	0.74	2.92416e-09	3	si:ch211-74m13.1
gstt1b.2	1.23507e-13	0.822254	0.977	0.952	3.1209e-09	3	gstt1b
si:dkey-238d18.5	1.2705e-13	10.1912	0.057	0.003	3.21044e-09	3	si:dkey-238d18.5
serpinh1b.2	1.28839e-13	0.771152	0.955	0.866	3.25564e-09	3	serpinh1b
alpl.2	1.45015e-13	0.683389	0.977	0.868	3.66438e-09	3	alpl
LO018106.2	1.45411e-13	4.55173	0.057	0.003	3.67438e-09	3	LO018106.2
mycb.1	1.77384e-13	3.14533	0.449	0.244	4.48232e-09	3	mycb
epb41l4a.1	1.80595e-13	1.32653	0.784	0.675	4.56346e-09	3	epb41l4a
pcdh15b	2.01625e-13	8.03805	0.102	0.014	5.09487e-09	3	pcdh15b
tmem243a	2.52176e-13	4.69558	0.153	0.034	6.37224e-09	3	tmem243a
GRB14	2.52723e-13	8.17708	0.182	0.047	6.38605e-09	3	GRB14
si:ch211-160j14.3	2.62163e-13	4.56057	0.176	0.044	6.62459e-09	3	si:ch211-160j14.3
PTPRD	2.76427e-13	5.18727	0.108	0.016	6.98503e-09	3	PTPRD
insra.1	2.8302e-13	2.08614	0.551	0.342	7.15163e-09	3	insra
si:dkey-27i16.2.1	2.9264e-13	1.41962	0.688	0.507	7.39471e-09	3	si:dkey-27i16.2
myo3b	3.02211e-13	5.87639	0.142	0.029	7.63657e-09	3	myo3b
s100v2	3.12712e-13	1.7433	0.659	0.483	7.90192e-09	3	s100v2
sept7b.1	3.39528e-13	0.596481	1	0.998	8.57954e-09	3	sept7b
chst7	3.57345e-13	2.92749	0.312	0.123	9.02975e-09	3	chst7
ccdc80l2.1	4.13645e-13	2.90906	0.392	0.181	1.04524e-08	3	ccdc80l2
b3gnt7.1	4.35848e-13	1.47592	0.767	0.651	1.10135e-08	3	b3gnt7
blk	5.09714e-13	6.26615	0.193	0.054	1.288e-08	3	blk
fgf5	5.19121e-13	8.87576	0.08	0.008	1.31177e-08	3	fgf5
socs3a.1	6.42539e-13	2.09768	0.739	0.548	1.62363e-08	3	socs3a
fgl2a.1	6.53915e-13	6.30672	0.142	0.03	1.65238e-08	3	fgl2a
ccn2a	8.46605e-13	2.24623	0.858	0.736	2.13929e-08	3	ccn2a
arhgap4a.1	9.43528e-13	2.73276	0.33	0.139	2.3842e-08	3	arhgap4a
cox4i2.1	1.19773e-12	1.28694	0.818	0.668	3.02654e-08	3	cox4i2
plpp1a.2	1.28309e-12	1.1283	0.966	0.887	3.24225e-08	3	plpp1a
ism2a	1.45874e-12	1.79876	0.5	0.271	3.68609e-08	3	ism2a
si:ch73-138n13.1	1.76811e-12	0.956826	0.949	0.855	4.46784e-08	3	si:ch73-138n13.1
si:ch211-242b18.1.1	1.9892e-12	1.82137	0.341	0.151	5.02652e-08	3	si:ch211-242b18.1
cmtm7.3	2.08681e-12	1.05811	0.943	0.868	5.27315e-08	3	cmtm7
ABR	2.34232e-12	1.71632	0.534	0.321	5.9188e-08	3	ABR
cdh4	2.69107e-12	5.2055	0.091	0.012	6.80005e-08	3	cdh4
sept2.2	3.03265e-12	0.497283	1	1	7.66321e-08	3	2024-09-02
flrt3.2	3.05948e-12	1.23056	0.949	0.941	7.731e-08	3	flrt3
lpxn.1	3.18874e-12	2.50856	0.392	0.198	8.05764e-08	3	lpxn
hic2.1	3.26068e-12	1.77338	0.557	0.358	8.2394e-08	3	hic2
glt8d2.2	3.37855e-12	3.62865	0.244	0.086	8.53726e-08	3	glt8d2
cnn2.1	3.50261e-12	0.522446	1	0.999	8.85074e-08	3	cnn2
anp32b.3	3.72142e-12	0.654015	0.994	0.995	9.40366e-08	3	anp32b
epha4a.1	4.00173e-12	2.6189	0.449	0.248	1.0112e-07	3	epha4a
h3f3c.2	4.02462e-12	0.393993	1	1	1.01698e-07	3	h3f3c
CU468041.2.1	4.9731e-12	2.39589	0.295	0.115	1.25665e-07	3	CU468041.2
fgfr2	5.1065e-12	2.94122	0.42	0.228	1.29036e-07	3	fgfr2
epha7.1	5.17389e-12	1.91873	0.767	0.576	1.30739e-07	3	epha7
amotl2a.2	5.95711e-12	0.786832	1	0.997	1.5053e-07	3	amotl2a
trpv4	6.88463e-12	6.79952	0.142	0.032	1.73968e-07	3	trpv4
ms4a17a.11.2	7.72733e-12	0.690383	0.955	0.853	1.95262e-07	3	ms4a17a.11
CU929160.1.1	7.82046e-12	1.03951	0.688	0.464	1.97615e-07	3	CU929160.1
cbr1l	7.83434e-12	1.99592	0.58	0.382	1.97966e-07	3	cbr1l
FRMD1.1	7.94552e-12	3.90322	0.222	0.071	2.00775e-07	3	FRMD1
acvr1ba	9.47848e-12	1.1899	0.835	0.712	2.39512e-07	3	acvr1ba
sema3gb	9.76382e-12	3.69638	0.114	0.021	2.46722e-07	3	sema3gb
robo1.1	9.97004e-12	3.55994	0.301	0.13	2.51933e-07	3	robo1
[truncated: 856 more rows]

## Sheet: DEG_48hpf
48 hpf	p_val	avg_log2FC	pct.1	pct.2	p_val_adj	cluster	gene
pcna	3.35815e-59	1.72128	1	0.997	8.48571e-55	0	pcna
fen1	5.4082e-51	1.78026	0.912	0.718	1.3666e-46	0	fen1
rrm1	6.19617e-50	1.54519	0.998	0.987	1.56571e-45	0	rrm1
chaf1a	1.10251e-44	1.59638	0.937	0.772	2.78593e-40	0	chaf1a
nasp	5.14437e-43	1.50146	0.986	0.92	1.29993e-38	0	nasp
rpa2	1.40146e-42	1.35824	0.902	0.71	3.54134e-38	0	rpa2
mcm7	1.07524e-40	1.07783	1	0.97	2.71703e-36	0	mcm7
ccna2	1.01878e-39	1.10512	0.959	0.811	2.57436e-35	0	ccna2
stmn1a	3.97287e-39	1.31252	0.889	0.628	1.0039e-34	0	stmn1a
mcm4	1.99498e-38	0.900046	0.989	0.952	5.04112e-34	0	mcm4
cdc45	4.33698e-38	2.53639	0.644	0.325	1.09591e-33	0	cdc45
mibp	5.76326e-38	1.55623	0.882	0.696	1.45632e-33	0	mibp
shmt1	5.94637e-38	1.68858	0.828	0.619	1.50259e-33	0	shmt1
rbbp4	1.53332e-37	1.05536	0.993	0.955	3.87455e-33	0	rbbp4
hat1	6.1406e-37	1.42848	0.887	0.609	1.55167e-32	0	hat1
rfc2	1.43629e-36	1.61463	0.737	0.429	3.62937e-32	0	rfc2
slbp	2.14778e-36	1.54961	0.889	0.704	5.42722e-32	0	slbp
pold1	9.13818e-36	1.80133	0.862	0.69	2.30913e-31	0	pold1
esco2	1.17357e-35	2.53516	0.791	0.607	2.9655e-31	0	esco2
mcm2	1.71557e-35	0.867138	0.991	0.983	4.33506e-31	0	mcm2
peak3	9.92977e-35	3.3976	0.256	0.037	2.50915e-30	0	peak3
zgc:110540	1.60367e-34	2.53863	0.664	0.374	4.0523e-30	0	zgc:110540
rfc4	7.98462e-34	1.30469	0.88	0.671	2.01763e-29	0	rfc4
asf1ba	9.10069e-34	1.89785	0.751	0.495	2.29965e-29	0	asf1ba
ikzf1	1.7058e-33	2.45341	0.522	0.25	4.31039e-29	0	ikzf1
wdr4	3.48002e-33	0.930244	0.424	0.132	8.79366e-29	0	wdr4
sash3	3.48968e-33	1.6557	0.32	0.072	8.81808e-29	0	sash3
ssrp1a	3.88529e-33	1.03926	0.921	0.785	9.81775e-29	0	ssrp1a
npm1a	3.90846e-33	1.24945	0.918	0.776	9.87629e-29	0	npm1a
orc4	4.12712e-33	1.38827	0.776	0.509	1.04288e-28	0	orc4
mcm5	1.19357e-32	1.02772	0.986	0.961	3.01604e-28	0	mcm5
ptpn22	1.27602e-32	2.66859	0.315	0.074	3.22437e-28	0	ptpn22
rangap1b	1.32692e-32	0.788171	0.769	0.482	3.353e-28	0	rangap1b
dscc1	1.41619e-32	2.6429	0.512	0.22	3.57858e-28	0	dscc1
mcm3	3.20278e-32	0.818653	0.971	0.932	8.0931e-28	0	mcm3
chchd10	6.13231e-32	1.56087	0.39	0.116	1.54957e-27	0	chchd10
asf1bb	6.53885e-32	1.0793	0.85	0.639	1.6523e-27	0	asf1bb
tyms	7.87666e-32	1.60672	0.683	0.397	1.99035e-27	0	tyms
tk1	9.17629e-32	2.18036	0.669	0.387	2.31876e-27	0	tk1
impdh2	1.08338e-31	1.76195	0.501	0.23	2.7376e-27	0	impdh2
cdca7a	1.3743e-31	0.953402	0.925	0.826	3.47273e-27	0	cdca7a
ubr7	1.44745e-31	1.36553	0.839	0.647	3.65756e-27	0	ubr7
fthl27:1	1.49478e-31	2.90306	0.388	0.127	3.77716e-27	0	fthl27:1
smc4	2.09893e-31	0.672707	0.925	0.767	5.30378e-27	0	smc4
adssl	3.54672e-31	1.08443	0.896	0.751	8.96221e-27	0	adssl
si:dkey-164f24.2	4.48567e-31	2.48052	0.281	0.055	1.13348e-26	0	si:dkey-164f24.2
parm1	4.53903e-31	2.55762	0.313	0.077	1.14697e-26	0	parm1
gpr78a	5.47618e-31	2.96381	0.304	0.069	1.38378e-26	0	gpr78a
si:dkey-185m8.2	5.59769e-31	1.77267	0.347	0.1	1.41448e-26	0	si:dkey-185m8.2
tent5c	1.10348e-30	1.50434	0.447	0.164	2.78838e-26	0	tent5c
si:ch211-156b7.4	1.25574e-30	1.30239	0.723	0.495	3.17312e-26	0	si:ch211-156b7.4
ptger3	1.54333e-30	2.81197	0.399	0.146	3.89985e-26	0	ptger3
unga	1.81934e-30	2.24429	0.454	0.172	4.5973e-26	0	unga
mst1	1.92047e-30	1.91143	0.413	0.149	4.85283e-26	0	mst1
kif22	2.03402e-30	0.487925	0.918	0.75	5.13976e-26	0	kif22
prim2	2.38415e-30	1.46584	0.794	0.532	6.02452e-26	0	prim2
nutf2l	2.64992e-30	1.11253	0.785	0.527	6.69609e-26	0	nutf2l
psme1	2.70426e-30	2.23381	0.345	0.1	6.8334e-26	0	psme1
mcm6	3.17841e-30	0.95735	0.939	0.879	8.03152e-26	0	mcm6
nsun2	4.63029e-30	0.729187	0.723	0.435	1.17003e-25	0	nsun2
pom121	4.71799e-30	1.02097	0.891	0.701	1.19219e-25	0	pom121
aurkb	6.21321e-30	0.461448	0.905	0.717	1.57002e-25	0	aurkb
pon1	7.85152e-30	0.978308	0.456	0.18	1.984e-25	0	pon1
pola2	9.52672e-30	1.86118	0.721	0.475	2.40731e-25	0	pola2
mybbp1a	9.58605e-30	0.845351	0.619	0.338	2.4223e-25	0	mybbp1a
C8H9orf64	1.14732e-29	2.5406	0.338	0.092	2.89918e-25	0	C8H9orf64
si:ch211-197h24.8	1.93303e-29	2.02998	0.363	0.117	4.88458e-25	0	si:ch211-197h24.8
rasal3	2.01773e-29	1.50717	0.385	0.133	5.09859e-25	0	rasal3
uhrf1	2.13546e-29	1.08501	0.923	0.79	5.39609e-25	0	uhrf1
ppm1g	3.18723e-29	0.883274	0.952	0.878	8.05381e-25	0	ppm1g
psma6l	3.64998e-29	2.59904	0.279	0.063	9.22312e-25	0	psma6l
sumo3b	3.69845e-29	0.96355	0.952	0.867	9.34562e-25	0	sumo3b
lbr	3.89664e-29	0.640248	0.993	0.945	9.84641e-25	0	lbr
atad3	4.68613e-29	0.860824	0.576	0.277	1.18414e-24	0	atad3
iars1	4.85535e-29	1.04004	0.816	0.663	1.2269e-24	0	iars1
lpxn	4.98017e-29	1.27509	0.406	0.14	1.25844e-24	0	lpxn
pole2	5.02355e-29	2.04913	0.617	0.333	1.2694e-24	0	pole2
parp1	6.74118e-29	0.956451	0.866	0.674	1.70343e-24	0	parp1
mrpl16	7.36715e-29	0.752574	0.735	0.496	1.8616e-24	0	mrpl16
lig1	7.6869e-29	1.09159	0.766	0.518	1.9424e-24	0	lig1
e2f8	1.47594e-28	2.25375	0.737	0.504	3.72956e-24	0	e2f8
crispld2	1.51341e-28	2.9123	0.317	0.087	3.82424e-24	0	crispld2
znfl2a	1.56006e-28	1.14156	0.646	0.413	3.94213e-24	0	znfl2a
agap2	1.75131e-28	2.44142	0.39	0.145	4.42537e-24	0	agap2
ndc1	1.98143e-28	1.09839	0.782	0.545	5.00687e-24	0	ndc1
cahz	2.04588e-28	2.37847	0.703	0.523	5.16974e-24	0	cahz
arhgef3l	2.09835e-28	2.59527	0.297	0.073	5.30231e-24	0	arhgef3l
cdc6	2.39423e-28	1.50632	0.821	0.619	6.04998e-24	0	cdc6
rpa1	2.58086e-28	0.971118	0.977	0.946	6.52157e-24	0	rpa1
rnaseh2a	2.58764e-28	1.37047	0.735	0.483	6.53871e-24	0	rnaseh2a
mrto4	3.03279e-28	1.04727	0.488	0.2	7.66355e-24	0	mrto4
aamp	3.2115e-28	0.524507	0.701	0.44	8.11514e-24	0	aamp
pclaf	3.25705e-28	1.78975	0.592	0.306	8.23023e-24	0	pclaf
alas2	3.62496e-28	1.8807	0.712	0.525	9.1599e-24	0	alas2
gars1	4.61834e-28	0.699457	0.968	0.899	1.16701e-23	0	gars1
pa2g4b	4.97326e-28	0.777679	0.995	0.938	1.25669e-23	0	pa2g4b
derl3	5.14672e-28	1.13319	0.283	0.066	1.30053e-23	0	derl3
lpar5a	5.5286e-28	1.58884	0.388	0.149	1.39702e-23	0	lpar5a
si:dkey-44g23.5	6.04353e-28	1.09917	0.365	0.118	1.52714e-23	0	si:dkey-44g23.5
asns	1.3129e-27	1.16955	0.306	0.076	3.31757e-23	0	asns
timm50	1.49013e-27	1.2359	0.569	0.284	3.76541e-23	0	timm50
rfesd	1.75286e-27	2.24383	0.356	0.12	4.4293e-23	0	rfesd
ppox	2.02087e-27	1.72364	0.41	0.158	5.10654e-23	0	ppox
snu13b	2.33056e-27	0.948204	0.757	0.509	5.88909e-23	0	snu13b
lyar	2.43168e-27	0.955445	0.669	0.408	6.14461e-23	0	lyar
susd1	2.8098e-27	2.2341	0.399	0.151	7.10009e-23	0	susd1
rell2	3.14172e-27	2.05685	0.413	0.162	7.93882e-23	0	rell2
mxra8a	3.24634e-27	2.35849	0.531	0.305	8.20318e-23	0	mxra8a
utp4	3.67443e-27	0.621621	0.585	0.327	9.28493e-23	0	utp4
nup62l	3.98099e-27	0.841686	0.914	0.754	1.00596e-22	0	nup62l
dub	5.18505e-27	2.30185	0.299	0.08	1.31021e-22	0	dub
gask1a	5.54033e-27	1.17648	0.46	0.212	1.39999e-22	0	gask1a
wdhd1	6.20143e-27	1.33806	0.816	0.58	1.56704e-22	0	wdhd1
nmt1b	7.58798e-27	2.22681	0.544	0.312	1.91741e-22	0	nmt1b
dut	7.63182e-27	1.55739	0.63	0.348	1.92848e-22	0	dut
cebpa	7.70038e-27	2.0638	0.497	0.26	1.94581e-22	0	cebpa
rrm2	8.02637e-27	1.97593	0.735	0.476	2.02818e-22	0	rrm2
abce1	8.24788e-27	0.542216	0.991	0.958	2.08416e-22	0	abce1
blvrb	8.66588e-27	1.33284	0.655	0.446	2.18978e-22	0	blvrb
wasb	1.09373e-26	1.6285	0.324	0.096	2.76375e-22	0	wasb
bysl	1.28002e-26	0.919925	0.821	0.633	3.23448e-22	0	bysl
si:dkey-93h22.7	1.55597e-26	2.1227	0.497	0.255	3.93178e-22	0	si:dkey-93h22.7
mki67	1.81832e-26	0.145595	0.948	0.817	4.59471e-22	0	mki67
mrps2	1.828e-26	0.623843	0.558	0.281	4.61918e-22	0	mrps2
urod	2.07503e-26	0.506884	0.778	0.595	5.2434e-22	0	urod
rtcb	2.5337e-26	0.61765	0.712	0.458	6.40242e-22	0	rtcb
zgc:64051	2.70553e-26	2.34099	0.46	0.21	6.83661e-22	0	zgc:64051
dkc1	2.99999e-26	0.93183	0.902	0.791	7.58068e-22	0	dkc1
cntn1a	3.04548e-26	1.60314	0.517	0.246	7.69563e-22	0	cntn1a
slc4a1a	4.16212e-26	2.05821	0.707	0.541	1.05173e-21	0	slc4a1a
exosc6	4.37022e-26	1.3504	0.54	0.268	1.10431e-21	0	exosc6
sptb	5.25247e-26	1.30105	0.533	0.278	1.32725e-21	0	sptb
mxra8b	5.56295e-26	1.40894	0.499	0.253	1.4057e-21	0	mxra8b
ctps1a	5.73185e-26	0.994945	0.927	0.88	1.44838e-21	0	ctps1a
cd248b	5.81072e-26	3.33033	0.218	0.039	1.46831e-21	0	cd248b
thbs3a	5.91082e-26	2.72138	0.376	0.15	1.49361e-21	0	thbs3a
hbbe2	5.95262e-26	2.31991	0.639	0.444	1.50417e-21	0	hbbe2
si:ch73-248e21.7	6.1412e-26	1.99446	0.472	0.23	1.55182e-21	0	si:ch73-248e21.7
uck2b	6.72489e-26	0.698512	0.878	0.718	1.69931e-21	0	uck2b
tomm40l	6.8644e-26	0.738534	0.653	0.406	1.73456e-21	0	tomm40l
nt5c2l1	7.01043e-26	1.95168	0.608	0.394	1.77147e-21	0	nt5c2l1
pwp1	7.2376e-26	1.00629	0.59	0.316	1.82887e-21	0	pwp1
tp53rk	8.5439e-26	0.9639	0.472	0.211	2.15896e-21	0	tp53rk
prpf19	8.8645e-26	0.656707	0.993	0.922	2.23997e-21	0	prpf19
utp20	1.13392e-25	0.850842	0.562	0.289	2.8653e-21	0	utp20
wu:fb59d01	1.15591e-25	3.20372	0.184	0.023	2.92088e-21	0	wu:fb59d01
dnajc9	1.27708e-25	1.30455	0.819	0.595	3.22706e-21	0	dnajc9
ppa1b	1.34968e-25	1.39706	0.68	0.482	3.41051e-21	0	ppa1b
tufm	1.45792e-25	0.627949	0.866	0.69	3.68402e-21	0	tufm
prmt7	1.6064e-25	0.649786	0.578	0.301	4.05921e-21	0	prmt7
orc5	1.65821e-25	1.34677	0.637	0.382	4.19014e-21	0	orc5
AL954696.1	1.67183e-25	1.72572	0.395	0.151	4.22454e-21	0	AL954696.1
umps	1.96554e-25	0.902577	0.626	0.38	4.96671e-21	0	umps
nt5e	2.19454e-25	2.41483	0.372	0.142	5.54538e-21	0	nt5e
epb41b	2.34877e-25	1.81384	0.454	0.205	5.93511e-21	0	epb41b
eif4ebp3	2.52805e-25	1.86224	0.317	0.091	6.38813e-21	0	eif4ebp3
rfc3	2.72051e-25	1.21587	0.685	0.428	6.87445e-21	0	rfc3
jcada	2.73153e-25	1.61298	0.499	0.229	6.90232e-21	0	jcada
itprip	3.16578e-25	0.628512	0.494	0.224	7.9996e-21	0	itprip
itgae.2	3.55026e-25	2.63935	0.213	0.037	8.97114e-21	0	itgae.2
wdr43	4.42899e-25	0.465704	0.896	0.763	1.11916e-20	0	wdr43
bub3	4.94835e-25	0.46578	0.896	0.705	1.2504e-20	0	bub3
utp15	5.72828e-25	0.793821	0.633	0.373	1.44748e-20	0	utp15
nle1	5.90829e-25	0.409096	0.499	0.232	1.49297e-20	0	nle1
sh3bp5b	6.12796e-25	1.89728	0.322	0.106	1.54847e-20	0	sh3bp5b
gata1a	6.45307e-25	1.99276	0.558	0.331	1.63063e-20	0	gata1a
cebpd	6.57567e-25	0.692416	0.596	0.34	1.66161e-20	0	cebpd
hemgn	6.63389e-25	1.78482	0.515	0.273	1.67632e-20	0	hemgn
nup133	6.69754e-25	0.814349	0.794	0.585	1.6924e-20	0	nup133
gmip	6.82007e-25	2.07037	0.256	0.062	1.72336e-20	0	gmip
laptm5	7.13043e-25	1.88964	0.37	0.145	1.80179e-20	0	laptm5
aaas	7.20574e-25	1.25374	0.739	0.502	1.82082e-20	0	aaas
pcolcea	7.24613e-25	2.5949	0.259	0.064	1.83103e-20	0	pcolcea
bxdc2	8.85344e-25	1.02299	0.705	0.479	2.23718e-20	0	bxdc2
rrp9	9.09976e-25	0.508608	0.54	0.278	2.29942e-20	0	rrp9
tmod4	9.41708e-25	2.69476	0.415	0.175	2.3796e-20	0	tmod4
imp4	9.53232e-25	1.07841	0.476	0.212	2.40872e-20	0	imp4
si:ch211-222l21.1	9.79401e-25	0.721133	1	1	2.47485e-20	0	si:ch211-222l21.1
poc1b	9.94435e-25	1.57227	0.406	0.158	2.51284e-20	0	poc1b
dkk1b	1.06068e-24	8.00224	0.116	0.001	2.68022e-20	0	dkk1b
angpt1	1.1045e-24	1.95497	0.433	0.201	2.79096e-20	0	angpt1
rsl1d1	1.18729e-24	1.04877	0.594	0.333	3.00017e-20	0	rsl1d1
hsd17b10	1.25648e-24	0.992756	0.537	0.285	3.17499e-20	0	hsd17b10
tbc1d10c	1.29565e-24	1.97484	0.245	0.056	3.27397e-20	0	tbc1d10c
hoxd11a	1.39409e-24	1.49224	0.37	0.134	3.52271e-20	0	hoxd11a
tdh	1.44508e-24	0.857839	0.8	0.628	3.65158e-20	0	tdh
nup93	1.4832e-24	0.689631	0.941	0.825	3.74789e-20	0	nup93
nop58	1.50705e-24	1.02605	0.93	0.868	3.80817e-20	0	nop58
fam210ab	1.52578e-24	1.07348	0.281	0.074	3.8555e-20	0	fam210ab
plek	1.60052e-24	0.988204	0.274	0.073	4.04435e-20	0	plek
fam117ab	1.64448e-24	1.01317	0.347	0.118	4.15543e-20	0	fam117ab
nop16	1.90792e-24	0.733252	0.41	0.156	4.82113e-20	0	nop16
angptl5	2.24552e-24	1.99019	0.358	0.13	5.6742e-20	0	angptl5
rangap1a	2.32081e-24	0.600094	0.841	0.636	5.86446e-20	0	rangap1a
dnmt3bb.1	2.33843e-24	0.810288	0.83	0.68	5.90898e-20	0	dnmt3bb.1
rrp7a	2.38162e-24	0.839089	0.562	0.31	6.01811e-20	0	rrp7a
vox	2.56329e-24	1.28295	0.324	0.101	6.47718e-20	0	vox
sinhcafl	3.14857e-24	0.788222	0.798	0.565	7.95612e-20	0	sinhcafl
wnt11	3.1724e-24	2.15021	0.655	0.439	8.01634e-20	0	wnt11
dcaf13	3.18374e-24	0.913485	0.676	0.418	8.04499e-20	0	dcaf13
fech	3.38018e-24	2.00942	0.404	0.162	8.54137e-20	0	fech
timm10	3.41159e-24	0.653614	0.585	0.301	8.62075e-20	0	timm10
hmbsa	3.51329e-24	0.750697	0.612	0.359	8.87774e-20	0	hmbsa
tars1	3.58727e-24	0.479185	0.905	0.821	9.06466e-20	0	tars1
utp3	3.62653e-24	0.627501	0.413	0.158	9.16389e-20	0	utp3
arl4ca	3.7624e-24	1.98984	0.383	0.154	9.5072e-20	0	arl4ca
pus3	3.8516e-24	1.10652	0.392	0.142	9.73262e-20	0	pus3
mical1	3.88557e-24	3.78124	0.204	0.035	9.81844e-20	0	mical1
si:dkey-262k9.4	4.41033e-24	2.07383	0.324	0.108	1.11445e-19	0	si:dkey-262k9.4
nup37	4.64727e-24	1.47708	0.596	0.323	1.17432e-19	0	nup37
cth	4.74445e-24	0.710712	0.508	0.27	1.19888e-19	0	cth
cx43.4	4.747e-24	2.01164	0.451	0.196	1.19952e-19	0	cx43.4
slc20a1a	5.28737e-24	1.96417	0.354	0.124	1.33607e-19	0	slc20a1a
hbae1.1	5.33586e-24	1.95244	0.714	0.545	1.34832e-19	0	hbae1.1
isg20	5.47478e-24	0.85878	0.621	0.376	1.38342e-19	0	isg20
polr1c	5.54988e-24	1.10594	0.499	0.229	1.4024e-19	0	polr1c
ivns1abpb	5.6649e-24	1.2047	0.839	0.645	1.43146e-19	0	ivns1abpb
ttll12	5.83553e-24	1.24537	0.286	0.078	1.47458e-19	0	ttll12
suv39h1b	6.03637e-24	1.60587	0.671	0.406	1.52533e-19	0	suv39h1b
zgc:163057	6.18629e-24	1.982	0.374	0.145	1.56321e-19	0	zgc:163057
pdgfra	6.38434e-24	1.97709	0.51	0.264	1.61326e-19	0	pdgfra
fgfrl1b	6.51533e-24	1.36926	0.451	0.206	1.64636e-19	0	fgfrl1b
hspd1	6.52399e-24	0.746414	0.889	0.772	1.64855e-19	0	hspd1
nsun5	6.97043e-24	1.16322	0.433	0.176	1.76136e-19	0	nsun5
si:dkey-185e18.7	7.03541e-24	1.73005	0.385	0.141	1.77778e-19	0	si:dkey-185e18.7
fbl	7.04633e-24	0.941858	0.791	0.618	1.78054e-19	0	fbl
ube2t	7.11288e-24	2.6503	0.336	0.113	1.79735e-19	0	ube2t
nup210	7.85201e-24	0.572819	0.844	0.655	1.98412e-19	0	nup210
ssb	7.931e-24	0.820403	0.769	0.545	2.00408e-19	0	ssb
wdr75	7.94503e-24	0.627764	0.692	0.431	2.00763e-19	0	wdr75
hbae1.3:1	8.37702e-24	2.09421	0.685	0.509	2.11679e-19	0	hbae1.3:1
ttc36	8.92477e-24	1.75859	0.404	0.176	2.2552e-19	0	ttc36
nolc1	9.25422e-24	0.490443	0.78	0.6	2.33845e-19	0	nolc1
cdc42ep4a	9.4071e-24	1.08924	0.388	0.146	2.37708e-19	0	cdc42ep4a
elp2	1.03314e-23	0.700161	0.51	0.245	2.61064e-19	0	elp2
bop1	1.06334e-23	1.20049	0.576	0.354	2.68695e-19	0	bop1
tsr2	1.0716e-23	1.19344	0.442	0.198	2.70782e-19	0	tsr2
ampd2a	1.10625e-23	0.896219	0.757	0.562	2.79538e-19	0	ampd2a
rfc5	1.11139e-23	1.04002	0.821	0.587	2.80837e-19	0	rfc5
ppat	1.22212e-23	0.558907	0.499	0.239	3.08818e-19	0	ppat
alcamb	1.33058e-23	0.602593	0.288	0.079	3.36223e-19	0	alcamb
polr2h	1.3825e-23	0.832689	0.576	0.304	3.49344e-19	0	polr2h
myca	1.42053e-23	1.10056	0.739	0.534	3.58954e-19	0	myca
pa2g4a	1.47431e-23	0.746625	0.934	0.837	3.72544e-19	0	pa2g4a
zgc:86609	1.51372e-23	0.220073	0.338	0.11	3.82502e-19	0	zgc:86609
yars1	1.61227e-23	0.897867	0.76	0.558	4.07405e-19	0	yars1
vars1	1.6523e-23	0.751992	0.735	0.558	4.1752e-19	0	vars1
fam49ba	1.66357e-23	2.17765	0.349	0.124	4.20369e-19	0	fam49ba
daam1b	1.82428e-23	0.608696	0.553	0.29	4.60976e-19	0	daam1b
zgc:174904	1.88062e-23	2.017	0.268	0.072	4.75213e-19	0	zgc:174904
mcm10	2.07746e-23	2.60527	0.351	0.123	5.24953e-19	0	mcm10
tnfaip8l2b	2.22534e-23	2.61535	0.211	0.041	5.6232e-19	0	tnfaip8l2b
npm3	2.32852e-23	1.06393	0.662	0.399	5.88394e-19	0	npm3
col5a1	2.41217e-23	1.96623	0.549	0.332	6.09531e-19	0	col5a1
adprm	2.47851e-23	0.623355	0.304	0.094	6.26294e-19	0	adprm
usp1	2.49345e-23	0.903502	0.839	0.634	6.30069e-19	0	usp1
si:dkey-12l12.1	2.50138e-23	1.90777	0.406	0.175	6.32073e-19	0	si:dkey-12l12.1
ruvbl1	2.5725e-23	0.614236	0.805	0.623	6.50045e-19	0	ruvbl1
chaf1b	2.57627e-23	1.48589	0.741	0.516	6.50997e-19	0	chaf1b
prmt3	2.58193e-23	1.565	0.456	0.21	6.52428e-19	0	prmt3
cnbpa	2.68585e-23	0.747286	0.986	0.952	6.78688e-19	0	cnbpa
fpgs	2.78484e-23	0.461827	0.431	0.179	7.03701e-19	0	fpgs
nap1l4a	2.84459e-23	1.05531	0.608	0.384	7.18799e-19	0	nap1l4a
itgb3b	2.84888e-23	2.51739	0.356	0.139	7.19883e-19	0	itgb3b
btk	2.95699e-23	1.42798	0.463	0.243	7.47203e-19	0	btk
arpp19b	3.03355e-23	0.5761	0.844	0.626	7.66548e-19	0	arpp19b
pcbd1	3.12846e-23	2.00457	0.415	0.19	7.90532e-19	0	pcbd1
mpdu1a	3.47387e-23	1.04038	0.351	0.128	8.77813e-19	0	mpdu1a
zcchc7	3.56222e-23	1.52716	0.404	0.166	9.00136e-19	0	zcchc7
dnmt3ba	3.61648e-23	0.650074	0.671	0.429	9.13849e-19	0	dnmt3ba
si:ch211-227m13.1	3.6265e-23	0.655574	0.442	0.196	9.1638e-19	0	si:ch211-227m13.1
myb	3.62833e-23	2.75203	0.433	0.223	9.16842e-19	0	myb
smc2	3.62861e-23	0.899156	0.864	0.701	9.16913e-19	0	smc2
ddx47	3.7212e-23	0.663137	0.803	0.581	9.40309e-19	0	ddx47
poldip3	3.77681e-23	0.485324	0.796	0.534	9.54363e-19	0	poldip3
gnmt	4.24447e-23	0.613818	0.42	0.183	1.07254e-18	0	gnmt
si:ch211-161c3.6	4.44767e-23	2.53762	0.431	0.223	1.12388e-18	0	si:ch211-161c3.6
znf622	4.514e-23	0.601687	0.567	0.301	1.14064e-18	0	znf622
riox2	4.52121e-23	1.78662	0.467	0.237	1.14246e-18	0	riox2
drll.1	4.56125e-23	0.828277	0.277	0.076	1.15258e-18	0	drll.1
slc20a1b	4.56504e-23	0.710138	0.991	0.959	1.15354e-18	0	slc20a1b
chchd6a	4.58417e-23	1.02443	0.361	0.124	1.15837e-18	0	chchd6a
kat7a	4.76242e-23	2.59139	0.222	0.046	1.20342e-18	0	kat7a
ndc80	4.79039e-23	0.890312	0.687	0.425	1.21048e-18	0	ndc80
znhit6	4.88464e-23	1.29169	0.304	0.091	1.2343e-18	0	znhit6
adss1	5.02481e-23	0.393326	0.322	0.107	1.26972e-18	0	adss1
eif2a	5.34915e-23	0.171595	0.782	0.535	1.35168e-18	0	eif2a
crnkl1	5.5826e-23	0.479953	0.896	0.732	1.41067e-18	0	crnkl1
msx2b	5.83951e-23	2.28577	0.483	0.272	1.47559e-18	0	msx2b
hif1al2	5.96249e-23	2.13734	0.41	0.193	1.50666e-18	0	hif1al2
ncapg	6.31299e-23	0.740398	0.8	0.587	1.59523e-18	0	ncapg
exosc2	6.37032e-23	0.806162	0.574	0.316	1.60972e-18	0	exosc2
hbae1.3	6.51772e-23	2.13686	0.705	0.539	1.64696e-18	0	hbae1.3
blf	6.77058e-23	0.193938	0.483	0.245	1.71086e-18	0	blf
si:ch1073-184j22.1	6.94948e-23	1.87143	0.426	0.201	1.75606e-18	0	si:ch1073-184j22.1
eef1akmt1	7.00807e-23	1.40737	0.433	0.184	1.77087e-18	0	eef1akmt1
mpv17l2	7.14995e-23	0.698177	0.363	0.13	1.80672e-18	0	mpv17l2
hgh1	7.65311e-23	1.44364	0.46	0.216	1.93386e-18	0	hgh1
myo1f	7.80276e-23	0.547401	0.306	0.097	1.97168e-18	0	myo1f
phgdh	7.81382e-23	0.580933	0.707	0.534	1.97448e-18	0	phgdh
lrrc47	8.86789e-23	1.37294	0.553	0.303	2.24083e-18	0	lrrc47
si:dkeyp-68b7.12	9.01887e-23	2.59327	0.349	0.135	2.27898e-18	0	si:dkeyp-68b7.12
slc1a4	9.02814e-23	1.63234	0.413	0.183	2.28132e-18	0	slc1a4
CR293511.1	1.03425e-22	2.36883	0.295	0.096	2.61345e-18	0	CR293511.1
cse1l	1.07514e-22	0.727558	0.878	0.767	2.71677e-18	0	cse1l
nup85	1.10102e-22	0.938433	0.712	0.471	2.78217e-18	0	nup85
rpa3	1.12483e-22	1.19227	0.497	0.235	2.84234e-18	0	rpa3
nup58	1.12774e-22	0.225682	0.841	0.667	2.8497e-18	0	nup58
si:ch73-208g10.1	1.16554e-22	1.71395	0.401	0.175	2.9452e-18	0	si:ch73-208g10.1
hbbe3	1.16608e-22	2.30253	0.719	0.587	2.94656e-18	0	hbbe3
si:ch73-281n10.2	1.18029e-22	0.500916	1	0.979	2.98248e-18	0	si:ch73-281n10.2
gnl2	1.19351e-22	0.579225	0.633	0.389	3.01589e-18	0	gnl2
wdr3	1.21805e-22	0.304794	0.812	0.598	3.07789e-18	0	wdr3
sypl2b	1.2266e-22	0.46682	0.73	0.487	3.09951e-18	0	sypl2b
atad2	1.29953e-22	1.25177	0.821	0.64	3.28378e-18	0	atad2
dap3	1.30904e-22	0.920927	0.707	0.474	3.30782e-18	0	dap3
zmp:0000001082	1.36631e-22	0.433009	0.49	0.237	3.45253e-18	0	zmp:0000001082
rnaseh2b	1.40627e-22	1.07517	0.63	0.341	3.5535e-18	0	rnaseh2b
gar1	1.53727e-22	0.799831	0.406	0.166	3.88452e-18	0	gar1
dnmt1	1.59929e-22	1.34858	0.855	0.69	4.04124e-18	0	dnmt1
emilin2b	1.63114e-22	1.09096	0.408	0.174	4.12173e-18	0	emilin2b
tuba8l2	1.6726e-22	1.43412	0.562	0.349	4.22649e-18	0	tuba8l2
gpx7	1.69991e-22	1.3557	0.376	0.153	4.2955e-18	0	gpx7
atic	1.92219e-22	0.6691	0.472	0.232	4.85719e-18	0	atic
msx3	1.97335e-22	1.63071	0.562	0.37	4.98645e-18	0	msx3
hoxd10a	1.97966e-22	1.28616	0.367	0.142	5.0024e-18	0	hoxd10a
elf1	2.05501e-22	0.873061	0.503	0.257	5.1928e-18	0	elf1
enpp6	2.27601e-22	2.11472	0.422	0.198	5.75126e-18	0	enpp6
si:ch211-262i1.3	2.37092e-22	0.957931	0.313	0.098	5.99107e-18	0	si:ch211-262i1.3
mgst1.2	2.61196e-22	1.49798	0.333	0.116	6.60017e-18	0	mgst1.2
ptpn6	2.66396e-22	1.70883	0.395	0.171	6.73156e-18	0	ptpn6
dhfr	2.73609e-22	1.45961	0.587	0.338	6.91381e-18	0	dhfr
prkcda	2.76982e-22	1.76835	0.324	0.114	6.99906e-18	0	prkcda
bcat1	2.87695e-22	2.31217	0.19	0.033	7.26975e-18	0	bcat1
dachb	2.97194e-22	1.08393	0.383	0.154	7.50979e-18	0	dachb
mrps18b	3.05679e-22	0.419457	0.585	0.32	7.72421e-18	0	mrps18b
tubg1	3.13734e-22	0.755733	0.9	0.762	7.92774e-18	0	tubg1
crabp2a	3.17039e-22	2.7683	0.535	0.333	8.01125e-18	0	crabp2a
thap12b	3.20639e-22	0.764291	0.451	0.198	8.10223e-18	0	thap12b
smyd3	3.56622e-22	0.381795	0.256	0.066	9.01148e-18	0	smyd3
akap1b	3.61713e-22	0.659138	0.723	0.455	9.14012e-18	0	akap1b
exosc7	3.75238e-22	0.737292	0.458	0.199	9.48189e-18	0	exosc7
hbae3	3.78644e-22	2.26011	0.782	0.688	9.56794e-18	0	hbae3
atf5a	3.78935e-22	1.4226	0.261	0.072	9.57531e-18	0	atf5a
galnt14	4.28456e-22	1.5224	0.249	0.063	1.08266e-17	0	galnt14
gnl3	4.32051e-22	0.864169	0.805	0.651	1.09175e-17	0	gnl3
znf296	4.47402e-22	2.19271	0.331	0.118	1.13054e-17	0	znf296
tmx1	4.59916e-22	0.562217	0.762	0.518	1.16216e-17	0	tmx1
smc5	4.62872e-22	0.959255	0.739	0.474	1.16963e-17	0	smc5
c1qbp	4.92715e-22	1.15627	0.637	0.417	1.24504e-17	0	c1qbp
thumpd3	5.13645e-22	0.313496	0.576	0.329	1.29793e-17	0	thumpd3
fkbp11	5.19102e-22	1.62503	0.356	0.138	1.31172e-17	0	fkbp11
thraa	5.28096e-22	0.747914	0.331	0.107	1.33445e-17	0	thraa
fastkd2	5.32676e-22	0.307468	0.392	0.154	1.34602e-17	0	fastkd2
mis12	5.57751e-22	1.78247	0.51	0.268	1.40938e-17	0	mis12
triobpa	5.64911e-22	1.12456	0.277	0.081	1.42747e-17	0	triobpa
gata2b	5.67995e-22	1.42124	0.299	0.096	1.43527e-17	0	gata2b
rcl1	5.75844e-22	0.730253	0.447	0.207	1.4551e-17	0	rcl1
il10ra	6.03273e-22	1.84064	0.306	0.101	1.52441e-17	0	il10ra
ezra	6.09926e-22	3.96985	0.197	0.037	1.54122e-17	0	ezra
lum	6.30091e-22	1.90241	0.401	0.171	1.59218e-17	0	lum
ANPEP	6.38731e-22	2.06292	0.483	0.26	1.61401e-17	0	ANPEP
MYG1	6.39611e-22	0.602017	0.918	0.792	1.61623e-17	0	MYG1
gins2	6.41231e-22	1.25112	0.494	0.235	1.62033e-17	0	gins2
sh3d21	6.5801e-22	1.73256	0.209	0.043	1.66273e-17	0	sh3d21
msh2	6.59422e-22	1.3922	0.619	0.378	1.66629e-17	0	msh2
rgs13	6.97553e-22	2.68625	0.193	0.036	1.76265e-17	0	rgs13
kazald3	7.36325e-22	2.12024	0.42	0.206	1.86062e-17	0	kazald3
mab21l2	7.42832e-22	1.7266	0.435	0.205	1.87706e-17	0	mab21l2
ahcy	7.65108e-22	0.700521	0.984	0.937	1.93335e-17	0	ahcy
grap2b	7.72799e-22	1.40158	0.388	0.164	1.95279e-17	0	grap2b
rars1	7.9274e-22	0.86603	0.81	0.681	2.00318e-17	0	rars1
ppifb	7.96792e-22	1.11921	0.56	0.321	2.01341e-17	0	ppifb
lrrc17	8.28815e-22	2.50197	0.565	0.361	2.09433e-17	0	lrrc17
si:rp71-68n21.9	9.82939e-22	1.19504	0.406	0.185	2.48379e-17	0	si:rp71-68n21.9
orc2	1.01215e-21	1.63362	0.517	0.278	2.55761e-17	0	orc2
cd7al	1.04822e-21	1.22177	0.313	0.11	2.64875e-17	0	cd7al
cbr1l	1.14518e-21	0.950111	0.678	0.48	2.89376e-17	0	cbr1l
hmbsb	1.14679e-21	1.01445	0.635	0.453	2.89784e-17	0	hmbsb
cdc25b	1.15225e-21	0.366485	0.832	0.625	2.91162e-17	0	cdc25b
rexo4	1.15237e-21	0.638143	0.442	0.19	2.91192e-17	0	rexo4
spi2	1.17908e-21	1.78299	0.385	0.175	2.97941e-17	0	spi2
anp32b	1.21858e-21	0.736212	0.998	0.989	3.07924e-17	0	anp32b
stard13a	1.28237e-21	1.10372	0.392	0.172	3.24041e-17	0	stard13a
nifk	1.29733e-21	1.06489	0.673	0.443	3.27822e-17	0	nifk
skp2	1.30168e-21	1.71024	0.519	0.264	3.2892e-17	0	skp2
rpia	1.31981e-21	0.610492	0.472	0.221	3.33503e-17	0	rpia
banf1	1.34694e-21	0.719533	0.941	0.829	3.40359e-17	0	banf1
nup107	1.39962e-21	0.59579	0.889	0.782	3.5367e-17	0	nup107
ncaph2	1.4139e-21	1.64252	0.615	0.381	3.57277e-17	0	ncaph2
srsf10b	1.44586e-21	0.638153	0.776	0.549	3.65355e-17	0	srsf10b
and1	1.4885e-21	2.43852	0.608	0.407	3.76129e-17	0	and1
ncl	1.50633e-21	0.788089	0.946	0.915	3.80634e-17	0	ncl
UTP14C	1.52162e-21	0.892173	0.524	0.297	3.84499e-17	0	UTP14C
ankhb	1.55455e-21	0.896499	0.397	0.169	3.92819e-17	0	ankhb
serpinb1l1	1.55972e-21	2.28636	0.19	0.036	3.94127e-17	0	serpinb1l1
gp1bb	1.5672e-21	2.88545	0.24	0.062	3.96015e-17	0	gp1bb
sp8a	1.60759e-21	2.83673	0.351	0.144	4.06222e-17	0	sp8a
prmt1	1.61412e-21	0.698004	0.993	0.961	4.07872e-17	0	prmt1
wipf1a	1.65721e-21	0.615307	0.385	0.16	4.18762e-17	0	wipf1a
prrx1b	1.75309e-21	2.53067	0.463	0.246	4.42989e-17	0	prrx1b
hbbe1.3	1.86167e-21	1.92026	0.771	0.646	4.70425e-17	0	hbbe1.3
tfb2m	2.01034e-21	1.09985	0.488	0.257	5.07994e-17	0	tfb2m
CABZ01109481.1	2.02349e-21	0.893217	0.229	0.057	5.11316e-17	0	CABZ01109481.1
lonp1	2.11584e-21	0.965872	0.562	0.319	5.34651e-17	0	lonp1
hspa4a	2.19324e-21	0.658349	0.773	0.583	5.5421e-17	0	hspa4a
hdr	2.19706e-21	0.724356	0.467	0.237	5.55175e-17	0	hdr
wdr36	2.32717e-21	0.783581	0.671	0.452	5.88052e-17	0	wdr36
pdss1	2.69507e-21	0.747325	0.551	0.3	6.81016e-17	0	pdss1
pmm2	2.83652e-21	0.739959	0.501	0.254	7.16761e-17	0	pmm2
slc38a5a	2.91166e-21	1.66988	0.336	0.121	7.35748e-17	0	slc38a5a
dis3	2.91619e-21	0.855211	0.499	0.239	7.36892e-17	0	dis3
bcl2l16	3.03493e-21	0.655549	0.925	0.812	7.66896e-17	0	bcl2l16
pdcd11	3.27107e-21	0.744134	0.571	0.347	8.26568e-17	0	pdcd11
trmt61a	3.37984e-21	1.70219	0.44	0.204	8.54051e-17	0	trmt61a
mars1	3.41138e-21	0.5748	0.787	0.627	8.62023e-17	0	mars1
rnmt	3.433e-21	0.222822	0.676	0.439	8.67484e-17	0	rnmt
utp25	3.43444e-21	0.666214	0.522	0.264	8.67848e-17	0	utp25
prkcbb	3.43502e-21	2.858	0.392	0.163	8.67995e-17	0	prkcbb
col12a1b	3.60817e-21	1.77233	0.535	0.316	9.11747e-17	0	col12a1b
hars	3.61322e-21	0.448898	0.923	0.821	9.13025e-17	0	hars
dnajb2	3.76019e-21	1.17138	0.306	0.101	9.50161e-17	0	dnajb2
cebpz	3.81249e-21	0.545455	0.583	0.343	9.63378e-17	0	cebpz
col5a2a	3.85203e-21	1.45459	0.576	0.359	9.73369e-17	0	col5a2a
slc29a2	3.92288e-21	2.38472	0.642	0.432	9.91272e-17	0	slc29a2
disp1	3.97239e-21	0.801059	0.465	0.217	1.00378e-16	0	disp1
si:dkey-100n23.3	4.01379e-21	0.153211	0.546	0.281	1.01424e-16	0	si:dkey-100n23.3
mrps34	4.07381e-21	0.527522	0.655	0.399	1.02941e-16	0	mrps34
coro1a	4.41674e-21	1.47225	0.512	0.327	1.11607e-16	0	coro1a
cep57l1	4.46967e-21	0.791411	0.481	0.221	1.12944e-16	0	cep57l1
wars1	4.86577e-21	0.847183	0.51	0.256	1.22953e-16	0	wars1
hgd	4.92178e-21	1.87349	0.633	0.438	1.24368e-16	0	hgd
rbm28	4.98967e-21	0.568088	0.472	0.229	1.26084e-16	0	rbm28
polr1e	5.08442e-21	0.79026	0.494	0.246	1.28478e-16	0	polr1e
tfdp1b	5.16138e-21	0.619592	0.787	0.598	1.30423e-16	0	tfdp1b
ttc4	5.30213e-21	1.1708	0.435	0.196	1.33979e-16	0	ttc4
hmgb2b	5.51023e-21	0.56407	1	0.999	1.39238e-16	0	hmgb2b
parvg	5.52987e-21	1.22878	0.392	0.169	1.39734e-16	0	parvg
nucks1b	5.60514e-21	0.898434	0.846	0.666	1.41636e-16	0	nucks1b
farsa	5.62001e-21	0.448403	0.821	0.656	1.42012e-16	0	farsa
and2	5.78993e-21	2.14336	0.637	0.452	1.46306e-16	0	and2
b3glcta	5.80828e-21	0.10489	0.508	0.241	1.46769e-16	0	b3glcta
gpc1a	6.118e-21	2.27229	0.508	0.309	1.54596e-16	0	gpc1a
xrcc5	6.14179e-21	0.424524	0.841	0.668	1.55197e-16	0	xrcc5
eif6	6.19367e-21	0.869311	0.778	0.571	1.56508e-16	0	eif6
hbbe1.1	6.24368e-21	1.55399	0.728	0.582	1.57771e-16	0	hbbe1.1
naa40	6.40239e-21	0.79377	0.794	0.579	1.61782e-16	0	naa40
ctsk	6.44532e-21	0.485725	0.896	0.738	1.62867e-16	0	ctsk
bmp7b	6.47651e-21	1.42946	0.37	0.152	1.63655e-16	0	bmp7b
uros	6.65732e-21	0.487695	0.533	0.293	1.68224e-16	0	uros
pim2	6.81309e-21	0.53779	0.347	0.131	1.7216e-16	0	pim2
mettl1	7.17601e-21	0.912182	0.472	0.224	1.81331e-16	0	mettl1
si:dkey-66i24.9	7.37325e-21	1.79706	0.37	0.151	1.86315e-16	0	si:dkey-66i24.9
polr3h	7.61209e-21	0.728524	0.51	0.259	1.9235e-16	0	polr3h
cd82a	7.83028e-21	1.04088	0.789	0.603	1.97863e-16	0	cd82a
pnp5b	8.1679e-21	2.16727	0.317	0.112	2.06395e-16	0	pnp5b
hoxa13b	8.60849e-21	1.0679	0.404	0.182	2.17528e-16	0	hoxa13b
ttll4	8.76439e-21	0.368935	0.766	0.578	2.21467e-16	0	ttll4
si:dkey-12j5.1	9.10413e-21	0.564344	0.476	0.24	2.30052e-16	0	si:dkey-12j5.1
fam210aa	9.30569e-21	0.458431	0.483	0.238	2.35145e-16	0	fam210aa
sfxn4	9.42488e-21	1.23519	0.322	0.112	2.38157e-16	0	sfxn4
dnajc2	1.01018e-20	0.753402	0.683	0.46	2.55262e-16	0	dnajc2
cbx5	1.02818e-20	0.699979	1	0.987	2.59812e-16	0	cbx5
hoxa11b	1.02848e-20	1.03836	0.415	0.195	2.59887e-16	0	hoxa11b
si:dkey-217l24.1	1.04966e-20	1.75824	0.27	0.08	2.65238e-16	0	si:dkey-217l24.1
zgc:86764	1.0823e-20	0.475944	0.703	0.451	2.73487e-16	0	zgc:86764
hbbe1.2	1.08743e-20	1.93471	0.732	0.598	2.74783e-16	0	hbbe1.2
krcp	1.11732e-20	2.51059	0.605	0.374	2.82334e-16	0	krcp
ndst3	1.20499e-20	0.63307	0.34	0.128	3.04489e-16	0	ndst3
mrpl43	1.22741e-20	1.08891	0.333	0.118	3.10153e-16	0	mrpl43
runx1	1.27099e-20	2.35393	0.159	0.023	3.21167e-16	0	runx1
aatf	1.28152e-20	0.720899	0.583	0.328	3.23827e-16	0	aatf
col1a1b	1.47365e-20	2.48524	0.653	0.462	3.72377e-16	0	col1a1b
si:ch73-334d15.4	1.48265e-20	2.41899	0.308	0.111	3.74651e-16	0	si:ch73-334d15.4
psme2	1.4885e-20	1.92236	0.338	0.132	3.76129e-16	0	psme2
fam210b	1.51029e-20	0.927829	0.782	0.624	3.81634e-16	0	fam210b
ncapg2	1.5826e-20	1.488	0.66	0.415	3.99907e-16	0	ncapg2
tsn	1.60096e-20	0.219154	0.542	0.303	4.04546e-16	0	tsn
mthfd2	1.62708e-20	0.360936	0.717	0.537	4.11147e-16	0	mthfd2
setb	1.63945e-20	0.676421	0.998	0.983	4.14272e-16	0	setb
riok2	1.64577e-20	0.809903	0.642	0.397	4.15871e-16	0	riok2
arhgap15	1.79748e-20	3.79003	0.154	0.022	4.54206e-16	0	arhgap15
mrpl18	1.80798e-20	0.889463	0.465	0.215	4.56858e-16	0	mrpl18
pprc1	1.83055e-20	1.31058	0.542	0.322	4.62561e-16	0	pprc1
rrm2:1	1.84466e-20	1.52338	0.576	0.312	4.66126e-16	0	rrm2:1
dnajc15	1.84618e-20	0.405379	0.485	0.227	4.6651e-16	0	dnajc15
ca6	1.90175e-20	2.50972	0.497	0.287	4.80553e-16	0	ca6
pum3	2.12261e-20	1.06525	0.537	0.278	5.36361e-16	0	pum3
noc2l	2.16708e-20	0.895761	0.608	0.402	5.47599e-16	0	noc2l
tspo	2.22922e-20	0.235008	0.719	0.503	5.63302e-16	0	tspo
rnf145a	2.25699e-20	1.58043	0.308	0.11	5.7032e-16	0	rnf145a
ttc27	2.25801e-20	1.4439	0.469	0.234	5.70577e-16	0	ttc27
dnase1l4.2	2.27344e-20	1.59143	0.342	0.128	5.74476e-16	0	dnase1l4.2
ckap2l	2.30416e-20	0.585854	0.524	0.265	5.82237e-16	0	ckap2l
odc1	2.49002e-20	0.508079	0.986	0.963	6.29204e-16	0	odc1
capn12	2.52233e-20	1.6713	0.562	0.358	6.37368e-16	0	capn12
gart	2.54015e-20	1.22023	0.474	0.265	6.41869e-16	0	gart
cdkn2aipnl	2.57146e-20	0.733908	0.637	0.394	6.49783e-16	0	cdkn2aipnl
mettl14	2.71194e-20	0.82104	0.551	0.307	6.85279e-16	0	mettl14
hspa9	2.79093e-20	0.554035	0.909	0.798	7.05241e-16	0	hspa9
dsn1	2.79366e-20	1.06497	0.58	0.33	7.05931e-16	0	dsn1
syk	2.79635e-20	2.11262	0.32	0.119	7.06609e-16	0	syk
col1a1a	2.80123e-20	1.84783	0.805	0.679	7.07844e-16	0	col1a1a
pah	2.80968e-20	1.95285	0.578	0.392	7.09978e-16	0	pah
tnc	2.81726e-20	2.48397	0.488	0.267	7.11894e-16	0	tnc
fkbp7	2.96748e-20	1.21049	0.476	0.248	7.49854e-16	0	fkbp7
shq1	2.9713e-20	1.69598	0.308	0.108	7.50817e-16	0	shq1
gpr183a	2.98964e-20	0.64497	0.34	0.129	7.55453e-16	0	gpr183a
mrps11	3.0553e-20	0.766283	0.551	0.299	7.72044e-16	0	mrps11
ncapd2	3.16711e-20	0.730269	0.866	0.686	8.00296e-16	0	ncapd2
hm13	3.2692e-20	0.659897	0.989	0.932	8.26093e-16	0	hm13
mrpl24	3.28876e-20	1.23957	0.413	0.173	8.31038e-16	0	mrpl24
ptprc	3.43924e-20	1.65714	0.345	0.139	8.69061e-16	0	ptprc
uba2	3.5548e-20	0.5446	0.941	0.836	8.98262e-16	0	uba2
krr1	3.62423e-20	0.272506	0.537	0.277	9.15807e-16	0	krr1
ampd3b	3.66767e-20	0.834022	0.488	0.256	9.26783e-16	0	ampd3b
col2a1b	3.71887e-20	1.64134	0.515	0.307	9.39722e-16	0	col2a1b
TUBB4B	3.75227e-20	0.205019	0.63	0.392	9.48162e-16	0	TUBB4B
tmed1b	3.78615e-20	0.778118	0.63	0.395	9.56723e-16	0	tmed1b
zgc:66448	3.79736e-20	0.995551	0.519	0.286	9.59555e-16	0	zgc:66448
pola1	3.81254e-20	0.978047	0.769	0.546	9.6339e-16	0	pola1
rnaseh2c	3.88586e-20	1.30842	0.58	0.343	9.81917e-16	0	rnaseh2c
nup43	3.91439e-20	0.917317	0.562	0.31	9.89128e-16	0	nup43
smad6b	3.93989e-20	0.605465	0.832	0.681	9.9557e-16	0	smad6b
apool	3.94576e-20	0.392898	0.567	0.319	9.97054e-16	0	apool
fbln1	4.08284e-20	1.74886	0.612	0.407	1.03169e-15	0	fbln1
tpbga	4.34776e-20	0.30116	0.417	0.186	1.09864e-15	0	tpbga
CABZ01058261.1	4.57671e-20	0.170998	0.907	0.777	1.15649e-15	0	CABZ01058261.1
znf503	4.60332e-20	0.812931	0.773	0.617	1.16321e-15	0	znf503
def6a	4.60867e-20	1.87615	0.213	0.051	1.16456e-15	0	def6a
tdp1	4.70204e-20	1.76317	0.397	0.172	1.18816e-15	0	tdp1
st13	4.7145e-20	0.616509	0.785	0.617	1.19131e-15	0	st13
alx4a	4.71531e-20	1.7199	0.426	0.211	1.19151e-15	0	alx4a
vstm4a	4.90135e-20	1.08821	0.583	0.386	1.23852e-15	0	vstm4a
setd6	5.13625e-20	1.42148	0.365	0.15	1.29788e-15	0	setd6
timm8b	5.16305e-20	0.696122	0.429	0.182	1.30465e-15	0	timm8b
msh6	5.17488e-20	1.24955	0.612	0.364	1.30764e-15	0	msh6
rad23ab	5.27106e-20	2.21259	0.37	0.153	1.33195e-15	0	rad23ab
dlx5a	5.49592e-20	2.36525	0.272	0.087	1.38877e-15	0	dlx5a
llph	5.52044e-20	0.872461	0.56	0.308	1.39496e-15	0	llph
haus5	5.54676e-20	1.41868	0.383	0.162	1.40161e-15	0	haus5
nsd2	5.66733e-20	0.927965	0.701	0.507	1.43208e-15	0	nsd2
ankrd33ba	5.71131e-20	2.56058	0.145	0.019	1.44319e-15	0	ankrd33ba
chchd1	5.78619e-20	1.11614	0.463	0.218	1.46211e-15	0	chchd1
timm44	5.78706e-20	0.464802	0.562	0.347	1.46233e-15	0	timm44
fmoda	5.84456e-20	2.2991	0.515	0.321	1.47686e-15	0	fmoda
zgc:110269	5.86975e-20	1.26613	0.456	0.212	1.48323e-15	0	zgc:110269
ctdspl2b	5.88898e-20	1.1206	0.653	0.415	1.48809e-15	0	ctdspl2b
alcama	5.92025e-20	0.774077	0.354	0.146	1.49599e-15	0	alcama
haus1	6.2862e-20	1.31214	0.438	0.204	1.58846e-15	0	haus1
hoxd12a	6.40356e-20	0.696532	0.331	0.124	1.61812e-15	0	hoxd12a
thg1l	7.06446e-20	1.61577	0.317	0.114	1.78512e-15	0	thg1l
si:rp71-36a1.3	7.19538e-20	3.50523	0.175	0.032	1.8182e-15	0	si:rp71-36a1.3
CABZ01074130.1	7.2755e-20	2.17979	0.615	0.447	1.83845e-15	0	CABZ01074130.1
dtl	7.27996e-20	1.88853	0.463	0.234	1.83957e-15	0	dtl
fibina	7.41694e-20	1.01891	0.263	0.081	1.87419e-15	0	fibina
eva1bb	7.43703e-20	1.53186	0.444	0.23	1.87926e-15	0	eva1bb
adsl	7.67539e-20	0.639609	0.857	0.689	1.9395e-15	0	adsl
cdca7b	7.87988e-20	1.01901	0.776	0.572	1.99117e-15	0	cdca7b
naa15a	8.07399e-20	0.342527	0.787	0.618	2.04022e-15	0	naa15a
hpdb	8.15148e-20	1.59216	0.61	0.426	2.0598e-15	0	hpdb
rad51	8.51232e-20	1.5248	0.703	0.464	2.15098e-15	0	rad51
cldng	8.79419e-20	1.66747	0.193	0.041	2.2222e-15	0	cldng
vcanb	8.99384e-20	1.88464	0.608	0.417	2.27265e-15	0	vcanb
acy3.2	9.03482e-20	1.63318	0.558	0.371	2.28301e-15	0	acy3.2
hyal4	9.39395e-20	2.11894	0.413	0.211	2.37376e-15	0	hyal4
ifrd2	9.59129e-20	0.344907	0.773	0.545	2.42362e-15	0	ifrd2
cks1b	9.68485e-20	0.89809	0.624	0.396	2.44726e-15	0	cks1b
si:dkeyp-120h9.1	9.75586e-20	0.86766	0.526	0.306	2.46521e-15	0	si:dkeyp-120h9.1
ddx51	9.82208e-20	0.368257	0.431	0.205	2.48194e-15	0	ddx51
clgn	1.00392e-19	0.72922	0.834	0.718	2.5368e-15	0	clgn
pnn	1.0071e-19	0.19229	0.859	0.685	2.54484e-15	0	pnn
mrpl3	1.02298e-19	0.393459	0.735	0.504	2.58496e-15	0	mrpl3
ctnnbl1	1.04e-19	0.532507	0.839	0.686	2.62797e-15	0	ctnnbl1
cpox	1.06054e-19	0.281066	0.639	0.461	2.67988e-15	0	cpox
neil1	1.07326e-19	0.815216	0.408	0.172	2.71202e-15	0	neil1
abcf1	1.09394e-19	0.598344	0.85	0.722	2.76428e-15	0	abcf1
crabp1b	1.1201e-19	3.01575	0.222	0.058	2.83038e-15	0	crabp1b
gins4	1.14676e-19	1.30058	0.467	0.229	2.89774e-15	0	gins4
nol12	1.14782e-19	0.942177	0.58	0.325	2.90042e-15	0	nol12
txn	1.15024e-19	0.725883	0.317	0.113	2.90654e-15	0	txn
rrp36	1.1535e-19	1.28808	0.333	0.12	2.91479e-15	0	rrp36
gins1	1.16538e-19	1.23898	0.51	0.27	2.94479e-15	0	gins1
uchl5	1.16685e-19	0.62453	0.694	0.466	2.94852e-15	0	uchl5
matn4	1.17348e-19	0.852965	0.921	0.828	2.96528e-15	0	matn4
iba57	1.17882e-19	0.291215	0.594	0.349	2.97875e-15	0	iba57
mrc1b	1.28705e-19	0.612963	0.526	0.279	3.25224e-15	0	mrc1b
thap12a	1.32272e-19	0.73535	0.685	0.462	3.34237e-15	0	thap12a
ccdc80l2	1.39307e-19	1.65127	0.531	0.331	3.52015e-15	0	ccdc80l2
ddx54	1.40404e-19	0.426627	0.535	0.294	3.54788e-15	0	ddx54
irf4a	1.41768e-19	2.1592	0.229	0.062	3.58233e-15	0	irf4a
hcfc1a	1.41998e-19	0.408876	0.909	0.762	3.58814e-15	0	hcfc1a
samm50	1.54865e-19	0.502663	0.61	0.363	3.91328e-15	0	samm50
bhmt	1.57609e-19	1.083	0.635	0.44	3.98263e-15	0	bhmt
hoxc3a	1.68965e-19	0.811731	0.385	0.169	4.26959e-15	0	hoxc3a
hoxc11b	1.74575e-19	0.610873	0.379	0.161	4.41134e-15	0	hoxc11b
snu13a	1.74877e-19	0.775421	0.42	0.186	4.41896e-15	0	snu13a
mad2l1	1.74942e-19	0.230275	0.714	0.475	4.42061e-15	0	mad2l1
mtap	1.75505e-19	0.610298	0.535	0.273	4.43483e-15	0	mtap
mccc1	1.78355e-19	0.125313	0.814	0.626	4.50684e-15	0	mccc1
gpr174	1.80853e-19	3.929	0.168	0.03	4.56998e-15	0	gpr174
keap1b	1.86928e-19	0.118748	0.812	0.633	4.72348e-15	0	keap1b
hagh	1.88666e-19	0.265316	0.372	0.153	4.76741e-15	0	hagh
CABZ01068367.1	1.90507e-19	2.36685	0.2	0.045	4.81392e-15	0	CABZ01068367.1
gas1a	1.98196e-19	0.356527	0.844	0.658	5.00821e-15	0	gas1a
acy3.1	1.99279e-19	1.9128	0.265	0.085	5.03558e-15	0	acy3.1
drg1	2.01875e-19	0.655083	0.855	0.715	5.10119e-15	0	drg1
drg2	2.06246e-19	0.46458	0.823	0.62	5.21163e-15	0	drg2
atp1b3b	2.09496e-19	1.0727	0.313	0.114	5.29376e-15	0	atp1b3b
dph6	2.15752e-19	1.45096	0.315	0.113	5.45183e-15	0	dph6
gdf6a	2.21112e-19	0.539616	0.385	0.172	5.58727e-15	0	gdf6a
pus7	2.28063e-19	0.894366	0.56	0.339	5.76292e-15	0	pus7
rpusd4	2.29064e-19	0.177478	0.338	0.123	5.78821e-15	0	rpusd4
slc27a4	2.37546e-19	0.679166	0.29	0.097	6.00255e-15	0	slc27a4
zic1	2.43471e-19	0.905737	0.458	0.235	6.15228e-15	0	zic1
klf17	2.48655e-19	0.511865	0.653	0.439	6.28326e-15	0	klf17
slc15a4	2.7448e-19	0.802407	0.456	0.226	6.93585e-15	0	slc15a4
prrx1a	2.74623e-19	1.46247	0.576	0.398	6.93945e-15	0	prrx1a
si:ch211-161h7.4	2.89746e-19	0.831543	0.655	0.435	7.32159e-15	0	si:ch211-161h7.4
ccne2	2.95304e-19	1.88848	0.633	0.419	7.46204e-15	0	ccne2
hells	3.02552e-19	0.396492	0.832	0.675	7.64519e-15	0	hells
klf1	3.07968e-19	1.87853	0.433	0.234	7.78204e-15	0	klf1
wrap53	3.09839e-19	0.473268	0.51	0.27	7.82932e-15	0	wrap53
fap	3.13778e-19	2.36709	0.451	0.251	7.92886e-15	0	fap
exosc8	3.20067e-19	0.705895	0.497	0.259	8.08778e-15	0	exosc8
tspan36	3.24807e-19	0.738082	0.683	0.473	8.20756e-15	0	tspan36
srprb	3.35736e-19	0.804054	0.633	0.406	8.48371e-15	0	srprb
CABZ01068251.1	3.46376e-19	0.668219	0.592	0.347	8.75257e-15	0	CABZ01068251.1
cad	3.53899e-19	1.24931	0.553	0.307	8.94267e-15	0	cad
b2m	3.56145e-19	0.614802	0.451	0.211	8.99943e-15	0	b2m
psme3	3.64791e-19	0.422414	0.76	0.562	9.2179e-15	0	psme3
pus1	3.68317e-19	1.21778	0.338	0.127	9.307e-15	0	pus1
plxnc1	3.70094e-19	2.78697	0.331	0.134	9.35192e-15	0	plxnc1
si:ch211-167j9.5	3.73412e-19	2.38013	0.166	0.03	9.43575e-15	0	si:ch211-167j9.5
ncaph	3.78919e-19	0.405938	0.757	0.557	9.5749e-15	0	ncaph
ripor3	3.91812e-19	2.41609	0.299	0.109	9.90071e-15	0	ripor3
znf367	3.93599e-19	1.28322	0.463	0.23	9.94585e-15	0	znf367
fah	3.93893e-19	1.43843	0.585	0.392	9.95328e-15	0	fah
s1pr5b	3.99237e-19	1.58129	0.24	0.068	1.00883e-14	0	s1pr5b
nudt1	4.04568e-19	1.77945	0.315	0.119	1.0223e-14	0	nudt1
ankzf1	4.10238e-19	1.51246	0.379	0.164	1.03663e-14	0	ankzf1
setbp1	4.27478e-19	1.25355	0.261	0.081	1.08019e-14	0	setbp1
si:ch211-37e10.2	4.28394e-19	0.694973	0.456	0.239	1.08251e-14	0	si:ch211-37e10.2
p3h3	4.29579e-19	0.557941	0.719	0.545	1.0855e-14	0	p3h3
pes	4.36673e-19	0.700508	0.703	0.519	1.10343e-14	0	pes
btg3	4.56345e-19	1.35734	0.635	0.425	1.15314e-14	0	btg3
me1	4.63241e-19	1.89645	0.268	0.085	1.17056e-14	0	me1
grap2a	4.6358e-19	1.4075	0.358	0.15	1.17142e-14	0	grap2a
selenoh	4.6369e-19	0.766331	0.773	0.557	1.1717e-14	0	selenoh
nop56	4.64746e-19	0.622136	0.959	0.882	1.17437e-14	0	nop56
ptpn1	4.75054e-19	0.603034	0.778	0.623	1.20041e-14	0	ptpn1
pdia5	4.75229e-19	0.45438	0.839	0.688	1.20086e-14	0	pdia5
frem1a	4.86492e-19	2.12701	0.34	0.139	1.22932e-14	0	frem1a
tbrg4	4.98395e-19	1.03716	0.544	0.3	1.25939e-14	0	tbrg4
TCIM	5.04068e-19	1.37017	0.213	0.054	1.27373e-14	0	TCIM
ddx18	5.10464e-19	0.76884	0.728	0.571	1.28989e-14	0	ddx18
znf106a	5.12128e-19	1.31528	0.415	0.187	1.2941e-14	0	znf106a
orc3	5.21065e-19	1.05121	0.603	0.359	1.31668e-14	0	orc3
gpc1b	5.22952e-19	0.66305	0.41	0.202	1.32145e-14	0	gpc1b
twist1b	5.30543e-19	1.559	0.306	0.117	1.34063e-14	0	twist1b
atp2a3	5.79151e-19	1.86165	0.286	0.099	1.46346e-14	0	atp2a3
acss1	6.03322e-19	1.01603	0.422	0.195	1.52453e-14	0	acss1
usp36	6.12746e-19	0.866005	0.662	0.472	1.54835e-14	0	usp36
lgals3b	6.15825e-19	0.303866	0.78	0.616	1.55613e-14	0	lgals3b
ranbp1	6.25478e-19	0.669605	0.989	0.946	1.58052e-14	0	ranbp1
ccdc80l1	6.38474e-19	1.23393	0.401	0.205	1.61336e-14	0	ccdc80l1
dus2	6.39567e-19	0.947696	0.503	0.264	1.61612e-14	0	dus2
rfc1	6.58452e-19	1.37824	0.615	0.364	1.66384e-14	0	rfc1
aifm4	6.59797e-19	1.63675	0.476	0.252	1.66724e-14	0	aifm4
seta	6.66463e-19	0.586537	1	0.994	1.68408e-14	0	seta
utp6	6.76601e-19	0.944859	0.58	0.339	1.7097e-14	0	utp6
tal1	6.90175e-19	0.362765	0.832	0.684	1.744e-14	0	tal1
cpt1ab	6.95627e-19	1.65747	0.417	0.2	1.75778e-14	0	cpt1ab
rcc1	6.99867e-19	0.74109	0.633	0.451	1.7685e-14	0	rcc1
sf3b4	7.11712e-19	0.379225	0.923	0.794	1.79843e-14	0	sf3b4
ntd5	7.29263e-19	1.80772	0.51	0.331	1.84277e-14	0	ntd5
abi3bpb	7.43802e-19	3.05228	0.465	0.252	1.87951e-14	0	abi3bpb
nr6a1b	7.56643e-19	1.10919	0.249	0.077	1.91196e-14	0	nr6a1b
glsl	7.63192e-19	1.71465	0.313	0.114	1.92851e-14	0	glsl
nup54	7.69498e-19	0.512941	0.819	0.657	1.94444e-14	0	nup54
sdr16c5a	7.78982e-19	0.494233	0.524	0.27	1.96841e-14	0	sdr16c5a
fibinb	8.0919e-19	1.66654	0.315	0.117	2.04474e-14	0	fibinb
cdk2	8.09658e-19	0.899205	0.812	0.638	2.04592e-14	0	cdk2
bcas2	8.16332e-19	0.786742	0.741	0.557	2.06279e-14	0	bcas2
col8a2	8.2673e-19	0.580714	0.397	0.175	2.08906e-14	0	col8a2
hoxc11a	8.32897e-19	1.92099	0.345	0.141	2.10465e-14	0	hoxc11a
kremen1	8.34609e-19	2.35815	0.308	0.116	2.10897e-14	0	kremen1
mettl21a	8.41514e-19	0.987515	0.247	0.072	2.12642e-14	0	mettl21a
phlda3	8.87956e-19	1.37193	0.349	0.139	2.24378e-14	0	phlda3
cep120	9.0014e-19	0.821665	0.478	0.249	2.27456e-14	0	cep120
NUP85	9.30716e-19	0.874029	0.615	0.375	2.35183e-14	0	NUP85
ppargc1b	9.31708e-19	1.75037	0.438	0.2	2.35433e-14	0	ppargc1b
slit1a	9.38175e-19	0.522589	0.56	0.351	2.37068e-14	0	slit1a
pde12	9.65947e-19	1.30292	0.537	0.312	2.44085e-14	0	pde12
prdx1	9.88703e-19	0.441515	0.959	0.882	2.49835e-14	0	prdx1
tdrkh	9.94792e-19	0.81813	0.46	0.226	2.51374e-14	0	tdrkh
med24	1.01069e-18	0.462065	0.671	0.436	2.55391e-14	0	med24
tfdp1a	1.02569e-18	0.476998	0.912	0.771	2.59181e-14	0	tfdp1a
ZNF276	1.0323e-18	0.371385	0.678	0.45	2.60853e-14	0	ZNF276
dek	1.05932e-18	0.759343	0.705	0.488	2.67681e-14	0	dek
lrp1aa	1.11656e-18	2.24397	0.438	0.226	2.82144e-14	0	lrp1aa
nrros	1.12091e-18	0.204765	0.798	0.649	2.83243e-14	0	nrros
fhl2a	1.13541e-18	0.852778	0.422	0.22	2.86907e-14	0	fhl2a
haus4	1.13542e-18	1.78299	0.533	0.317	2.8691e-14	0	haus4
lhx2b	1.13983e-18	1.59974	0.286	0.102	2.88024e-14	0	lhx2b
riok1	1.144e-18	0.589608	0.503	0.274	2.89077e-14	0	riok1
akr7a3	1.14834e-18	0.283161	0.687	0.468	2.90174e-14	0	akr7a3
dusp22b	1.2011e-18	0.632138	0.612	0.37	3.03507e-14	0	dusp22b
vldlr	1.20321e-18	1.41179	0.306	0.108	3.04038e-14	0	vldlr
noc3l	1.20768e-18	0.769556	0.556	0.347	3.05168e-14	0	noc3l
ccdc88b	1.26731e-18	2.94004	0.313	0.123	3.20236e-14	0	ccdc88b
nfs1	1.29302e-18	0.311277	0.565	0.351	3.26733e-14	0	nfs1
eif4ebp1	1.30654e-18	0.619162	0.832	0.656	3.3015e-14	0	eif4ebp1
ergic3	1.35668e-18	0.467137	0.73	0.505	3.42818e-14	0	ergic3
hmgn7	1.37564e-18	0.679965	0.998	0.982	3.4761e-14	0	hmgn7
atad5a	1.37601e-18	1.60383	0.617	0.408	3.47703e-14	0	atad5a
tktb	1.4182e-18	0.424882	0.932	0.829	3.58365e-14	0	tktb
cox17	1.43699e-18	0.885761	0.34	0.129	3.63113e-14	0	cox17
sgo1	1.45416e-18	0.292206	0.676	0.443	3.67452e-14	0	sgo1
gcat	1.47548e-18	0.547641	0.528	0.299	3.72839e-14	0	gcat
syncripl	1.48074e-18	0.506606	0.912	0.781	3.74169e-14	0	syncripl
ssbp1	1.48738e-18	0.633157	0.49	0.245	3.75845e-14	0	ssbp1
meis1a	1.4918e-18	0.897422	0.485	0.256	3.76963e-14	0	meis1a
dnttip2	1.56084e-18	0.415686	0.678	0.495	3.94408e-14	0	dnttip2
zgc:66479	1.60309e-18	2.10165	0.533	0.348	4.05084e-14	0	zgc:66479
mapk12a	1.64392e-18	0.73999	0.288	0.1	4.15402e-14	0	mapk12a
cnpy3	1.66795e-18	0.675988	0.333	0.131	4.21474e-14	0	cnpy3
ercc3	1.68257e-18	0.291817	0.531	0.287	4.25167e-14	0	ercc3
sars1	1.68745e-18	0.231777	0.952	0.839	4.26401e-14	0	sars1
fgfr2	1.69332e-18	1.3865	0.469	0.248	4.27886e-14	0	fgfr2
rcan2	1.70284e-18	1.43709	0.306	0.112	4.3029e-14	0	rcan2
si:ch211-76l23.4	1.74511e-18	1.91513	0.488	0.299	4.40972e-14	0	si:ch211-76l23.4
jade3	1.76196e-18	0.374299	0.773	0.548	4.4523e-14	0	jade3
msi2b	1.89809e-18	0.945176	0.322	0.123	4.79628e-14	0	msi2b
timm13	1.89896e-18	0.428475	0.574	0.334	4.79847e-14	0	timm13
serpine3	1.94016e-18	1.63136	0.304	0.111	4.90259e-14	0	serpine3
wdr12	1.95247e-18	0.861401	0.585	0.382	4.93369e-14	0	wdr12
slc10a4	1.96459e-18	1.58095	0.336	0.135	4.96433e-14	0	slc10a4
psmd11b	1.96787e-18	0.400168	0.932	0.826	4.97262e-14	0	psmd11b
pole	1.97884e-18	1.32015	0.463	0.23	5.00034e-14	0	pole
zic3	2.00392e-18	2.20592	0.444	0.242	5.06369e-14	0	zic3
mmp11a	2.00451e-18	1.49969	0.388	0.19	5.06519e-14	0	mmp11a
crfb4	2.0397e-18	1.05097	0.444	0.208	5.15411e-14	0	crfb4
wasa	2.14513e-18	0.493342	0.333	0.13	5.42052e-14	0	wasa
rpz5	2.17912e-18	1.89743	0.41	0.19	5.50643e-14	0	rpz5
zgc:101663	2.20219e-18	3.28595	0.12	0.012	5.56471e-14	0	zgc:101663
rpf2	2.22478e-18	0.651076	0.673	0.51	5.62179e-14	0	rpf2
nob1	2.30288e-18	0.372914	0.646	0.43	5.81915e-14	0	nob1
si:ch211-160f23.5	2.32012e-18	1.79275	0.259	0.084	5.86271e-14	0	si:ch211-160f23.5
hist1h4l:21	2.34881e-18	1.42153	0.565	0.33	5.93522e-14	0	hist1h4l:21
dck	2.34967e-18	2.26679	0.379	0.173	5.93738e-14	0	dck
ciao1	2.39016e-18	0.123376	0.805	0.585	6.03969e-14	0	ciao1
sfxn2	2.39839e-18	0.35462	0.583	0.336	6.0605e-14	0	sfxn2
hoxc6b	2.431e-18	1.10506	0.304	0.111	6.1429e-14	0	hoxc6b
alad	2.44179e-18	0.360509	0.746	0.538	6.17017e-14	0	alad
irf7	2.52781e-18	2.00862	0.193	0.045	6.38753e-14	0	irf7
notum1b	2.56203e-18	2.18672	0.438	0.23	6.47399e-14	0	notum1b
stk39	2.57895e-18	0.364083	0.342	0.131	6.51675e-14	0	stk39
zgc:91890	2.66421e-18	2.07128	0.313	0.121	6.73218e-14	0	zgc:91890
maptb	2.72531e-18	0.752105	0.283	0.096	6.88658e-14	0	maptb
meox1	2.83207e-18	0.326247	0.76	0.557	7.15637e-14	0	meox1
ccnk	2.85738e-18	0.471077	0.376	0.16	7.22031e-14	0	ccnk
dhps	2.90194e-18	0.880686	0.426	0.204	7.3329e-14	0	dhps
ldhba	2.93563e-18	0.764845	0.982	0.913	7.41804e-14	0	ldhba
SCARF2	3.02277e-18	0.298604	0.748	0.539	7.63823e-14	0	SCARF2
ank1a	3.04247e-18	1.87456	0.254	0.084	7.68801e-14	0	ank1a
ipo9	3.09482e-18	0.88237	0.773	0.628	7.8203e-14	0	ipo9
CABZ01080568.1	3.15484e-18	2.00358	0.238	0.069	7.97196e-14	0	CABZ01080568.1
eif2b1	3.20553e-18	0.272139	0.594	0.358	8.10005e-14	0	eif2b1
riox1	3.2206e-18	0.963216	0.469	0.248	8.13813e-14	0	riox1
tfr1a	3.26654e-18	1.43981	0.317	0.122	8.25423e-14	0	tfr1a
ppfibp2b	3.27554e-18	1.22389	0.463	0.25	8.27696e-14	0	ppfibp2b
peli3	3.28507e-18	1.40835	0.206	0.054	8.30104e-14	0	peli3
trmt13	3.39721e-18	1.18146	0.351	0.143	8.5844e-14	0	trmt13
mphosph6	3.42911e-18	0.495141	0.399	0.174	8.66502e-14	0	mphosph6
cd3eap	3.44193e-18	0.658001	0.392	0.173	8.69741e-14	0	cd3eap
inka1a	3.46343e-18	1.85813	0.474	0.266	8.75174e-14	0	inka1a
twistnb	3.47963e-18	0.328414	0.424	0.213	8.79267e-14	0	twistnb
ddx28	3.48953e-18	0.572887	0.422	0.191	8.81769e-14	0	ddx28
sdad1	3.58082e-18	0.946966	0.447	0.216	9.04837e-14	0	sdad1
dnase1l4.1	3.5832e-18	1.18844	0.478	0.286	9.05438e-14	0	dnase1l4.1
naf1	3.60261e-18	1.39416	0.433	0.21	9.10344e-14	0	naf1
usp3	3.61077e-18	0.343074	0.619	0.388	9.12405e-14	0	usp3
porb	3.63017e-18	0.406449	0.639	0.387	9.17307e-14	0	porb
ppan	3.73199e-18	0.683109	0.562	0.329	9.43036e-14	0	ppan
angpt2b	3.85526e-18	2.76625	0.34	0.147	9.74185e-14	0	angpt2b
elovl4a	4.26087e-18	0.210531	0.259	0.084	1.07668e-13	0	elovl4a
sephs1	4.28241e-18	0.45937	0.841	0.695	1.08212e-13	0	sephs1
mtfr2	4.33219e-18	0.512645	0.431	0.197	1.0947e-13	0	mtfr2
magoh	4.37755e-18	0.734064	0.678	0.433	1.10616e-13	0	magoh
aspg	4.39185e-18	0.419924	0.537	0.299	1.10978e-13	0	aspg
rrs1	4.50748e-18	0.687022	0.658	0.48	1.13899e-13	0	rrs1
hoxb7a	4.78426e-18	0.918596	0.385	0.168	1.20894e-13	0	hoxb7a
mrpl2	4.80854e-18	0.572029	0.789	0.646	1.21507e-13	0	mrpl2
pin1	4.84969e-18	0.664517	0.862	0.75	1.22547e-13	0	pin1
msra	4.86193e-18	1.80401	0.234	0.067	1.22856e-13	0	msra
tmem263	4.90406e-18	0.577056	0.751	0.62	1.23921e-13	0	tmem263
kpnb3	4.90693e-18	0.593555	0.948	0.85	1.23993e-13	0	kpnb3
itpka	5.08802e-18	1.18173	0.374	0.168	1.28569e-13	0	itpka
irf2	5.11624e-18	0.371082	0.456	0.231	1.29282e-13	0	irf2
msx1b	5.18024e-18	1.41123	0.519	0.337	1.30899e-13	0	msx1b
zc3h7a	5.40035e-18	0.956695	0.619	0.392	1.36461e-13	0	zc3h7a
kif2c	5.4631e-18	0.152569	0.673	0.452	1.38047e-13	0	kif2c
glipr1a	5.47097e-18	2.2266	0.152	0.026	1.38246e-13	0	glipr1a
armc1l	5.62819e-18	0.429462	0.603	0.344	1.42219e-13	0	armc1l
eme1	5.97675e-18	1.68537	0.376	0.162	1.51026e-13	0	eme1
fbp1a	6.14634e-18	0.99588	0.526	0.312	1.55312e-13	0	fbp1a
lyn:1	6.20517e-18	1.72101	0.374	0.167	1.56798e-13	0	lyn:1
taok3a	6.32228e-18	1.35501	0.306	0.116	1.59758e-13	0	taok3a
plcd4b	6.53105e-18	0.230118	0.374	0.165	1.65033e-13	0	plcd4b
scmh1	6.62497e-18	1.55958	0.494	0.267	1.67406e-13	0	scmh1
slc25a46	6.65748e-18	0.933766	0.336	0.134	1.68228e-13	0	slc25a46
men1	6.75974e-18	0.685561	0.669	0.453	1.70812e-13	0	men1
meis1b	6.81884e-18	0.69138	0.753	0.565	1.72305e-13	0	meis1b
col4a5	6.83497e-18	0.745358	0.327	0.131	1.72713e-13	0	col4a5
baz1b	6.84153e-18	0.35894	0.907	0.783	1.72879e-13	0	baz1b
serpinf1	6.90597e-18	0.243024	0.837	0.739	1.74507e-13	0	serpinf1
dnajb11	7.25162e-18	0.511631	0.918	0.794	1.83241e-13	0	dnajb11
polr3d	7.29771e-18	0.925746	0.306	0.119	1.84406e-13	0	polr3d
si:ch211-226m16.2	7.29868e-18	0.243233	0.689	0.488	1.8443e-13	0	si:ch211-226m16.2
hoxd9a	7.33949e-18	1.11843	0.406	0.199	1.85462e-13	0	hoxd9a
ptprr	7.35618e-18	0.342214	0.424	0.207	1.85883e-13	0	ptprr
ccdc62	7.40269e-18	0.770128	0.249	0.075	1.87059e-13	0	ccdc62
entpd8	7.92491e-18	1.1353	0.449	0.219	2.00255e-13	0	entpd8
ptges3b	7.92965e-18	0.5912	0.914	0.784	2.00374e-13	0	ptges3b
rpl7l1	8.04967e-18	0.73982	0.771	0.563	2.03407e-13	0	rpl7l1
tfr1b	8.16443e-18	0.208678	0.531	0.307	2.06307e-13	0	tfr1b
zgc:136858	8.35481e-18	2.71384	0.161	0.031	2.11118e-13	0	zgc:136858
parp3	8.47592e-18	0.893705	0.444	0.22	2.14178e-13	0	parp3
ssbp3a	8.52852e-18	1.98572	0.322	0.123	2.15507e-13	0	ssbp3a
nfe2	8.59509e-18	2.06626	0.231	0.067	2.17189e-13	0	nfe2
ccdc137	8.6275e-18	0.451661	0.458	0.238	2.18008e-13	0	ccdc137
adkb	8.65567e-18	0.563608	0.483	0.255	2.1872e-13	0	adkb
tiparp	8.67037e-18	0.430381	0.93	0.844	2.19092e-13	0	tiparp
tmeff2a	8.67696e-18	0.159937	0.562	0.333	2.19258e-13	0	tmeff2a
im:7140055	8.8769e-18	0.934573	0.431	0.208	2.2431e-13	0	im:7140055
nip7	8.90149e-18	0.553282	0.426	0.205	2.24932e-13	0	nip7
ctsh	8.9217e-18	0.580097	0.685	0.474	2.25443e-13	0	ctsh
prkab1a	8.95204e-18	0.740623	0.329	0.129	2.26209e-13	0	prkab1a
aqp3a	9.07213e-18	2.27693	0.546	0.387	2.29244e-13	0	aqp3a
mnd1	9.09088e-18	1.70793	0.322	0.129	2.29717e-13	0	mnd1
olfml3b	9.14708e-18	0.975621	0.252	0.083	2.31138e-13	0	olfml3b
qtrt1	9.48431e-18	0.400003	0.283	0.1	2.39659e-13	0	qtrt1
timm10b	9.51226e-18	0.605066	0.243	0.073	2.40365e-13	0	timm10b
zcchc9	9.54169e-18	0.545567	0.424	0.198	2.41109e-13	0	zcchc9
tnfaip8l2a	9.58908e-18	1.33601	0.406	0.207	2.42306e-13	0	tnfaip8l2a
afap1l1a	1.00316e-17	0.57612	0.599	0.367	2.53489e-13	0	afap1l1a
nat10	1.02749e-17	0.287	0.624	0.414	2.59636e-13	0	nat10
rpp14	1.03264e-17	1.16993	0.478	0.246	2.60938e-13	0	rpp14
mrpl12	1.07158e-17	0.692763	0.644	0.447	2.70777e-13	0	mrpl12
phc2a	1.07527e-17	0.172733	0.66	0.439	2.71709e-13	0	phc2a
rbp5	1.09887e-17	1.21925	0.365	0.164	2.77673e-13	0	rbp5
plxdc2	1.10532e-17	1.44944	0.517	0.312	2.79304e-13	0	plxdc2
retsat	1.12349e-17	0.600612	0.717	0.495	2.83895e-13	0	retsat
ppp1r3ca	1.17249e-17	0.253912	0.311	0.12	2.96276e-13	0	ppp1r3ca
aplnra	1.18519e-17	0.35095	1	0.997	2.99485e-13	0	aplnra
naprt	1.18973e-17	1.73198	0.463	0.251	3.00634e-13	0	naprt
fgfr4	1.19223e-17	0.405434	0.78	0.589	3.01265e-13	0	fgfr4
gbp1	1.19977e-17	0.340432	0.417	0.194	3.03169e-13	0	gbp1
si:ch211-198m17.1	1.20956e-17	1.95218	0.458	0.276	3.05644e-13	0	si:ch211-198m17.1
trnau1apa	1.23094e-17	0.955615	0.388	0.175	3.11047e-13	0	trnau1apa
rcn1	1.25136e-17	0.676229	0.807	0.67	3.16207e-13	0	rcn1
smarca5	1.25798e-17	0.60123	0.989	0.953	3.17878e-13	0	smarca5
dclre1b	1.27356e-17	1.06636	0.585	0.352	3.21815e-13	0	dclre1b
ctps1b	1.32566e-17	1.82442	0.429	0.211	3.34981e-13	0	ctps1b
hpf1	1.32684e-17	1.37304	0.503	0.275	3.35278e-13	0	hpf1
c19h1orf109	1.34374e-17	0.80743	0.272	0.091	3.3955e-13	0	c19h1orf109
snx20	1.36777e-17	4.01439	0.116	0.012	3.45623e-13	0	snx20
hmgb2a	1.37583e-17	0.471904	0.946	0.842	3.47659e-13	0	hmgb2a
mus81	1.39585e-17	1.06772	0.415	0.194	3.52719e-13	0	mus81
si:ch211-51a6.2	1.39913e-17	0.817164	0.408	0.195	3.53547e-13	0	si:ch211-51a6.2
rrp1	1.41129e-17	0.620044	0.683	0.49	3.56619e-13	0	rrp1
cyth4a	1.41218e-17	5.53667	0.116	0.012	3.56844e-13	0	cyth4a
manf	1.53653e-17	0.409908	0.755	0.539	3.88265e-13	0	manf
kpnb1	1.53786e-17	0.432216	0.975	0.948	3.88603e-13	0	kpnb1
wdr18	1.55142e-17	0.395159	0.685	0.461	3.92029e-13	0	wdr18
tomm20a:1	1.59421e-17	0.689425	0.717	0.51	4.0284e-13	0	tomm20a:1
col6a4a	1.67642e-17	0.699853	0.376	0.178	4.23616e-13	0	col6a4a
zgc:109744	1.70578e-17	0.345849	0.644	0.399	4.31033e-13	0	zgc:109744
tmem200b	1.70747e-17	1.04827	0.215	0.062	4.31461e-13	0	tmem200b
aimp1a	1.73744e-17	0.369216	0.819	0.618	4.39033e-13	0	aimp1a
ercc6l	1.74879e-17	1.4611	0.524	0.297	4.41903e-13	0	ercc6l
pabpc4	1.76984e-17	0.855157	0.447	0.231	4.4722e-13	0	pabpc4
rpusd2	1.78386e-17	0.78602	0.444	0.226	4.50764e-13	0	rpusd2
mxra5b	1.84832e-17	1.59905	0.59	0.406	4.67051e-13	0	mxra5b
alg12	1.86976e-17	0.711271	0.617	0.382	4.7247e-13	0	alg12
slc43a1a	1.88989e-17	0.661275	0.893	0.817	4.77556e-13	0	slc43a1a
ccn1	1.92687e-17	0.609799	0.721	0.547	4.86902e-13	0	ccn1
ecsit	2.14549e-17	0.521988	0.551	0.318	5.42144e-13	0	ecsit
usp44	2.16093e-17	0.557713	0.714	0.524	5.46044e-13	0	usp44
fkbp10b	2.18064e-17	0.782333	0.732	0.578	5.51025e-13	0	fkbp10b
prmt5	2.21559e-17	0.524591	0.714	0.53	5.59856e-13	0	prmt5
si:dkeyp-84f3.9	2.30748e-17	1.28246	0.336	0.135	5.83078e-13	0	si:dkeyp-84f3.9
si:dkey-27i16.2	2.34014e-17	0.657278	0.458	0.221	5.91329e-13	0	si:dkey-27i16.2
fam98b	2.40229e-17	0.429529	0.383	0.174	6.07035e-13	0	fam98b
kars1	2.48891e-17	0.502195	0.991	0.978	6.28922e-13	0	kars1
ggcx	2.5582e-17	0.528548	0.558	0.337	6.46432e-13	0	ggcx
eri1	2.57459e-17	0.774293	0.61	0.395	6.50572e-13	0	eri1
trmt11	2.60832e-17	0.782247	0.336	0.136	6.59096e-13	0	trmt11
selenom	2.61328e-17	0.601057	0.515	0.288	6.6035e-13	0	selenom
commd9	2.66125e-17	0.293886	0.517	0.266	6.72471e-13	0	commd9
pcxa	2.69357e-17	1.9499	0.431	0.216	6.80638e-13	0	pcxa
mat2aa	2.71509e-17	0.508386	0.884	0.777	6.86076e-13	0	mat2aa
dnajc11a	2.97198e-17	0.629685	0.63	0.432	7.50991e-13	0	dnajc11a
galk1	2.97203e-17	1.03062	0.358	0.154	7.51002e-13	0	galk1
ddx27	2.98519e-17	0.450466	0.444	0.22	7.54327e-13	0	ddx27
si:ch211-217k17.7	2.98853e-17	0.268194	0.512	0.294	7.55172e-13	0	si:ch211-217k17.7
wu:fu71h07	2.98902e-17	1.08729	0.286	0.101	7.55295e-13	0	wu:fu71h07
cdc40	3.16279e-17	0.339217	0.771	0.635	7.99206e-13	0	cdc40
haus6	3.19854e-17	1.58535	0.667	0.432	8.08239e-13	0	haus6
gata1b	3.19972e-17	2.11965	0.17	0.039	8.08537e-13	0	gata1b
napab	3.20398e-17	0.431635	0.891	0.738	8.09614e-13	0	napab
hmcn2	3.21046e-17	0.193583	0.59	0.395	8.11252e-13	0	hmcn2
dnaja3b	3.21908e-17	0.487745	0.277	0.098	8.13429e-13	0	dnaja3b
eef2l2	3.3207e-17	1.01791	0.304	0.116	8.39108e-13	0	eef2l2
GPR180	3.44628e-17	1.58149	0.261	0.088	8.70841e-13	0	GPR180
hprt1	3.47312e-17	1.02816	0.435	0.222	8.77623e-13	0	hprt1
pi4k2b	3.47928e-17	0.521426	0.617	0.386	8.7918e-13	0	pi4k2b
hmgb1b	3.5185e-17	0.62284	0.968	0.902	8.8909e-13	0	hmgb1b
unc13d	3.59537e-17	0.84443	0.363	0.165	9.08515e-13	0	unc13d
mrpl15	3.66088e-17	0.674209	0.558	0.322	9.25068e-13	0	mrpl15
larp4b	3.69849e-17	0.36317	0.812	0.65	9.34572e-13	0	larp4b
mylka	3.72057e-17	0.238369	0.331	0.143	9.40151e-13	0	mylka
drl	3.74156e-17	0.582033	0.245	0.081	9.45455e-13	0	drl
mthfd1b	3.75756e-17	0.83922	0.46	0.233	9.49498e-13	0	mthfd1b
slc43a3a	3.77869e-17	2.15072	0.195	0.05	9.54836e-13	0	slc43a3a
tcn2	3.77926e-17	0.993304	0.206	0.054	9.5498e-13	0	tcn2
zc3h15	3.80794e-17	0.558957	0.816	0.677	9.62228e-13	0	zc3h15
uqcc1	3.90119e-17	0.420542	0.776	0.575	9.85791e-13	0	uqcc1
lrwd1	3.91253e-17	1.70849	0.361	0.16	9.88657e-13	0	lrwd1
mgat1a	3.92974e-17	0.581413	0.537	0.314	9.93006e-13	0	mgat1a
rrbp1b	4.08485e-17	0.986443	0.526	0.334	1.0322e-12	0	rrbp1b
mphosph10	4.1906e-17	0.770518	0.549	0.355	1.05892e-12	0	mphosph10
ndnl2	4.37493e-17	1.1712	0.617	0.393	1.1055e-12	0	ndnl2
prim1	4.44551e-17	1.38939	0.644	0.424	1.12334e-12	0	prim1
erap2	4.53862e-17	3.3885	0.147	0.026	1.14686e-12	0	erap2
hoxa4a	4.57424e-17	0.261065	0.721	0.481	1.15586e-12	0	hoxa4a
kmt5ab	4.63414e-17	0.116992	0.517	0.285	1.171e-12	0	kmt5ab
gabpb2a	4.63742e-17	0.961685	0.313	0.122	1.17183e-12	0	gabpb2a
dhrs3b	4.76672e-17	0.453151	0.501	0.299	1.2045e-12	0	dhrs3b
fmnl1a	4.97646e-17	1.46534	0.247	0.08	1.2575e-12	0	fmnl1a
dars2	5.00003e-17	0.325876	0.345	0.146	1.26346e-12	0	dars2
lrpap1	5.01428e-17	0.250411	0.546	0.332	1.26706e-12	0	lrpap1
trmt5	5.15364e-17	0.636078	0.329	0.134	1.30227e-12	0	trmt5
abhd18	5.15485e-17	1.17903	0.311	0.121	1.30258e-12	0	abhd18
rhd	5.20233e-17	0.201427	0.578	0.382	1.31458e-12	0	rhd
si:dkey-21c19.3	5.28374e-17	0.529497	0.585	0.348	1.33515e-12	0	si:dkey-21c19.3
rdh14b	5.30431e-17	0.917538	0.542	0.305	1.34035e-12	0	rdh14b
cdc73	5.34498e-17	0.244416	0.862	0.681	1.35062e-12	0	cdc73
prpf3	5.36121e-17	0.177381	0.698	0.463	1.35472e-12	0	prpf3
tbc1d22b	5.41905e-17	2.05636	0.2	0.052	1.36934e-12	0	tbc1d22b
tmem209	5.44579e-17	0.684875	0.83	0.663	1.3761e-12	0	tmem209
dph1	5.51536e-17	1.15312	0.456	0.228	1.39368e-12	0	dph1
TCERG1L	5.53436e-17	2.07834	0.152	0.029	1.39848e-12	0	TCERG1L
MCUR1	5.78306e-17	0.782617	0.34	0.138	1.46132e-12	0	MCUR1
asdurf	5.8156e-17	0.39888	0.567	0.362	1.46954e-12	0	asdurf
vps26c	6.09092e-17	0.399458	0.8	0.626	1.53911e-12	0	vps26c
mrps16	6.45497e-17	0.994345	0.413	0.191	1.63111e-12	0	mrps16
pold3	6.49051e-17	1.02124	0.603	0.38	1.64009e-12	0	pold3
dnajc5ga	6.5273e-17	0.644894	0.723	0.495	1.64938e-12	0	dnajc5ga
nudc	6.71328e-17	0.617832	0.844	0.707	1.69638e-12	0	nudc
cdc7	6.73079e-17	1.77137	0.522	0.312	1.7008e-12	0	cdc7
tank	6.89695e-17	0.310756	0.431	0.202	1.74279e-12	0	tank
mafa	7.19035e-17	0.250171	0.658	0.453	1.81693e-12	0	mafa
c1qtnf5	7.49502e-17	1.65377	0.526	0.345	1.89392e-12	0	c1qtnf5
rpp40	7.62106e-17	0.313776	0.281	0.1	1.92576e-12	0	rpp40
mrps15	7.64418e-17	0.543481	0.483	0.259	1.93161e-12	0	mrps15
cd44b	7.68037e-17	2.50857	0.166	0.036	1.94075e-12	0	cd44b
med20	7.8453e-17	0.842459	0.472	0.238	1.98243e-12	0	med20
rasgrp2	8.0619e-17	2.25959	0.186	0.046	2.03716e-12	0	rasgrp2
fbxo32	8.08392e-17	1.06083	0.143	0.025	2.04273e-12	0	fbxo32
nanos1	8.08833e-17	1.21284	0.56	0.381	2.04384e-12	0	nanos1
sae1	8.19641e-17	0.184664	0.896	0.755	2.07115e-12	0	sae1
smfn	8.25442e-17	0.803389	0.485	0.274	2.08581e-12	0	smfn
klf15	8.28085e-17	1.1608	0.447	0.252	2.09249e-12	0	klf15
abcf3	8.33411e-17	0.390993	0.59	0.354	2.10595e-12	0	abcf3
psmb10	8.53845e-17	0.105037	0.583	0.354	2.15758e-12	0	psmb10
higd1a	8.67447e-17	0.487485	0.73	0.535	2.19195e-12	0	higd1a
gsdmeb	8.80206e-17	0.113655	0.354	0.152	2.22419e-12	0	gsdmeb
chek2	8.90409e-17	1.06963	0.431	0.226	2.24997e-12	0	chek2
dhx30	9.08585e-17	1.13596	0.263	0.091	2.2959e-12	0	dhx30
nomo	9.12151e-17	0.319052	0.898	0.783	2.30491e-12	0	nomo
zgc:113411	9.17054e-17	0.334388	0.637	0.391	2.3173e-12	0	zgc:113411
bckdha	9.47385e-17	0.275266	0.751	0.573	2.39395e-12	0	bckdha
nol10	9.48069e-17	0.536645	0.646	0.454	2.39568e-12	0	nol10
nup160	9.48734e-17	0.740814	0.703	0.535	2.39736e-12	0	nup160
gfra4b	9.66527e-17	1.08118	0.329	0.147	2.44232e-12	0	gfra4b
hoxa9b	9.7903e-17	1.05135	0.304	0.121	2.47391e-12	0	hoxa9b
dram2b	9.80261e-17	0.33884	0.787	0.594	2.47702e-12	0	dram2b
mrpl20	9.81811e-17	0.608697	0.494	0.257	2.48094e-12	0	mrpl20
siva1	9.93152e-17	1.2601	0.395	0.186	2.5096e-12	0	siva1
pspc1	9.9952e-17	0.456427	0.71	0.483	2.52569e-12	0	pspc1
fthl31	1.02228e-16	1.14941	0.887	0.835	2.58321e-12	0	fthl31
nop10	1.02899e-16	0.761041	0.542	0.3	2.60015e-12	0	nop10
igfbp5b	1.0422e-16	0.702224	0.347	0.152	2.63354e-12	0	igfbp5b
serpinh1b	1.06988e-16	0.880326	0.701	0.536	2.70349e-12	0	serpinh1b
lamc3	1.07244e-16	1.4291	0.492	0.296	2.70996e-12	0	lamc3
rbm38	1.0889e-16	1.32157	0.27	0.097	2.75155e-12	0	rbm38
lratd2	1.09197e-16	1.36446	0.122	0.017	2.75929e-12	0	lratd2
napsa	1.09608e-16	0.314688	0.732	0.528	2.76968e-12	0	napsa
eif2s1a	1.10745e-16	0.563756	0.805	0.653	2.79841e-12	0	eif2s1a
tfam	1.11239e-16	0.799325	0.739	0.519	2.81091e-12	0	tfam
ebna1bp2	1.13599e-16	0.477578	0.617	0.37	2.87053e-12	0	ebna1bp2
mpdu1b	1.14873e-16	0.84671	0.542	0.305	2.90272e-12	0	mpdu1b
cbx2	1.18191e-16	0.507879	0.61	0.374	2.98656e-12	0	cbx2
fstl1a	1.19545e-16	0.329036	0.367	0.163	3.02078e-12	0	fstl1a
MMP23B	1.2101e-16	2.15296	0.163	0.035	3.05779e-12	0	MMP23B
thoc3	1.22877e-16	0.540063	0.531	0.305	3.10497e-12	0	thoc3
sema3e	1.23961e-16	1.0662	0.472	0.273	3.13237e-12	0	sema3e
chek1	1.25097e-16	2.47316	0.385	0.185	3.16108e-12	0	chek1
zgc:110224	1.25837e-16	2.13064	0.302	0.118	3.17977e-12	0	zgc:110224
im:7136021	1.262e-16	0.511392	0.288	0.108	3.18894e-12	0	im:7136021
parp2	1.31767e-16	0.654939	0.578	0.365	3.32961e-12	0	parp2
fam207a	1.33458e-16	1.30899	0.227	0.069	3.37235e-12	0	fam207a
slc9a1b	1.33754e-16	1.08174	0.444	0.255	3.37984e-12	0	slc9a1b
BX322587.1	1.35112e-16	1.71918	0.122	0.017	3.41414e-12	0	BX322587.1
plrg1	1.35708e-16	0.399259	0.753	0.592	3.4292e-12	0	plrg1
smarcad1a	1.36261e-16	0.531284	0.741	0.509	3.44318e-12	0	smarcad1a
mmp14a	1.36593e-16	0.289974	0.569	0.403	3.45157e-12	0	mmp14a
rnf213a	1.36896e-16	0.256236	0.354	0.153	3.45922e-12	0	rnf213a
fbln2	1.38347e-16	0.397135	0.649	0.42	3.49589e-12	0	fbln2
pax9	1.38963e-16	1.72688	0.46	0.286	3.51146e-12	0	pax9
mdc1	1.39757e-16	1.18248	0.506	0.282	3.53152e-12	0	mdc1
si:dkey-6i22.5	1.40885e-16	1.38637	0.399	0.19	3.56003e-12	0	si:dkey-6i22.5
stat6	1.41411e-16	1.06415	0.327	0.138	3.57331e-12	0	stat6
nol7	1.42671e-16	0.47689	0.433	0.215	3.60514e-12	0	nol7
gpt2l	1.44052e-16	0.31655	0.551	0.321	3.64005e-12	0	gpt2l
nudcd1	1.44287e-16	0.247265	0.617	0.408	3.64598e-12	0	nudcd1
si:ch73-383g2.1	1.47019e-16	1.06579	0.454	0.238	3.71501e-12	0	si:ch73-383g2.1
dnaja3a	1.47527e-16	0.843042	0.458	0.239	3.72786e-12	0	dnaja3a
cdv3	1.51067e-16	0.3128	0.943	0.864	3.81732e-12	0	cdv3
smarcd3a	1.56594e-16	3.56483	0.159	0.033	3.95698e-12	0	smarcd3a
gch1	1.57725e-16	0.449654	0.524	0.326	3.98555e-12	0	gch1
ddx39ab	1.61031e-16	0.468841	0.993	0.964	4.0691e-12	0	ddx39ab
col6a1	1.62094e-16	2.60125	0.34	0.153	4.09595e-12	0	col6a1
si:ch211-194k22.8	1.62146e-16	0.495383	0.601	0.381	4.09727e-12	0	si:ch211-194k22.8
med31	1.63275e-16	0.39491	0.542	0.294	4.1258e-12	0	med31
rcn2	1.69251e-16	0.345785	0.46	0.235	4.2768e-12	0	rcn2
cdca5	1.7032e-16	1.08298	0.637	0.429	4.30382e-12	0	cdca5
shmt2	1.74154e-16	1.02127	0.415	0.215	4.40071e-12	0	shmt2
mat2b	1.76272e-16	0.29496	0.449	0.221	4.45423e-12	0	mat2b
aldob	1.801e-16	0.925696	0.576	0.395	4.55094e-12	0	aldob
tent5ba	1.83299e-16	1.5496	0.417	0.209	4.63178e-12	0	tent5ba
srpx	1.88792e-16	0.814562	0.574	0.351	4.77058e-12	0	srpx
rad18	1.97712e-16	1.09213	0.465	0.249	4.99599e-12	0	rad18
ndufaf7	1.98117e-16	0.255666	0.308	0.118	5.00622e-12	0	ndufaf7
hoxa13a	1.98411e-16	0.398144	0.356	0.161	5.01365e-12	0	hoxa13a
ppid	1.99547e-16	0.339229	0.841	0.67	5.04237e-12	0	ppid
f11r.1	2.01405e-16	1.60677	0.261	0.094	5.08931e-12	0	f11r.1
si:rp71-1g18.1	2.01838e-16	0.455668	0.685	0.466	5.10025e-12	0	si:rp71-1g18.1
tp53bp1	2.01845e-16	0.581757	0.683	0.47	5.10041e-12	0	tp53bp1
hapln1b	2.0536e-16	2.30647	0.256	0.089	5.18925e-12	0	hapln1b
chst2b	2.10034e-16	3.1207	0.231	0.075	5.30736e-12	0	chst2b
flvcr1	2.12965e-16	1.96267	0.215	0.064	5.38142e-12	0	flvcr1
gnl3l	2.13466e-16	1.07388	0.553	0.342	5.39408e-12	0	gnl3l
tns2b	2.17503e-16	1.2312	0.367	0.172	5.49608e-12	0	tns2b
prdx2	2.1789e-16	0.540529	0.984	0.932	5.50585e-12	0	prdx2
mtx2	2.18268e-16	0.629715	0.569	0.334	5.51541e-12	0	mtx2
gstt1a	2.20253e-16	2.11608	0.295	0.12	5.56558e-12	0	gstt1a
slc6a7	2.20401e-16	0.703975	0.261	0.092	5.5693e-12	0	slc6a7
hmgn3	2.20989e-16	0.735255	0.553	0.329	5.58416e-12	0	hmgn3
lmo4b	2.21654e-16	1.32391	0.281	0.108	5.60098e-12	0	lmo4b
ifi46	2.22764e-16	0.323771	0.129	0.02	5.62902e-12	0	ifi46
si:ch73-1a9.4	2.2469e-16	0.455855	0.442	0.226	5.67769e-12	0	si:ch73-1a9.4
srrt	2.25166e-16	0.53579	0.8	0.675	5.68971e-12	0	srrt
si:ch211-282b22.1	2.25495e-16	1.19391	0.331	0.141	5.69803e-12	0	si:ch211-282b22.1
acsl1a	2.32317e-16	0.36859	0.304	0.12	5.87042e-12	0	acsl1a
slx4ip	2.35264e-16	1.64366	0.17	0.04	5.94489e-12	0	slx4ip
galnt7	2.35424e-16	0.136066	0.744	0.519	5.94894e-12	0	galnt7
c1qtnf6b	2.35815e-16	2.37995	0.265	0.099	5.9588e-12	0	c1qtnf6b
cfap298	2.36314e-16	0.522777	0.338	0.145	5.97141e-12	0	cfap298
vcam1b	2.41039e-16	1.4365	0.118	0.015	6.09082e-12	0	vcam1b
tkfc	2.49835e-16	0.786792	0.358	0.161	6.31308e-12	0	tkfc
polr1d	2.50701e-16	0.940554	0.272	0.096	6.33497e-12	0	polr1d
h3f3b.1	2.57601e-16	0.477523	0.998	0.999	6.50933e-12	0	h3f3b.1
mob3a	2.58031e-16	0.186336	0.871	0.707	6.52018e-12	0	mob3a
znf800a	2.5855e-16	1.2639	0.209	0.059	6.53331e-12	0	znf800a
fasn	2.60835e-16	1.93644	0.279	0.103	6.59104e-12	0	fasn
ndufa10	2.61989e-16	0.482927	0.902	0.763	6.62019e-12	0	ndufa10
mrpl54	2.65817e-16	0.450033	0.379	0.166	6.71694e-12	0	mrpl54
aars1	2.71738e-16	0.364134	0.8	0.666	6.86656e-12	0	aars1
rbbp9	2.7254e-16	0.308579	0.481	0.239	6.88682e-12	0	rbbp9
dlx3b	2.72809e-16	1.77929	0.39	0.211	6.89361e-12	0	dlx3b
taldo1	2.78229e-16	0.555873	0.973	0.906	7.03057e-12	0	taldo1
rrp12	2.85559e-16	0.48931	0.692	0.52	7.21578e-12	0	rrp12
nop2	2.88555e-16	0.654783	0.637	0.448	7.29149e-12	0	nop2
rrp15	2.98797e-16	0.709901	0.492	0.273	7.55031e-12	0	rrp15
fzd9b	3.05912e-16	1.45505	0.46	0.277	7.73009e-12	0	fzd9b
fbxw4	3.20686e-16	0.229045	0.587	0.347	8.10342e-12	0	fbxw4
ddx52	3.24716e-16	0.535154	0.512	0.318	8.20524e-12	0	ddx52
wdr61	3.26787e-16	0.448543	0.698	0.455	8.25758e-12	0	wdr61
si:ch211-147a11.3	3.47946e-16	0.218631	0.46	0.234	8.79224e-12	0	si:ch211-147a11.3
ptx3a	3.53192e-16	1.52366	0.58	0.407	8.92481e-12	0	ptx3a
sfrp1a	3.54658e-16	0.810694	0.483	0.278	8.96185e-12	0	sfrp1a
coa3a	3.55526e-16	0.578081	0.544	0.297	8.9838e-12	0	coa3a
mtg1	3.57886e-16	0.936726	0.356	0.154	9.04342e-12	0	mtg1
pabpc1b	3.58549e-16	0.385112	0.685	0.512	9.06016e-12	0	pabpc1b
immt	3.59175e-16	0.273693	0.943	0.838	9.07598e-12	0	immt
nup50	3.63754e-16	0.236084	0.95	0.856	9.1917e-12	0	nup50
eif3hb	3.69158e-16	1.00522	0.274	0.101	9.32825e-12	0	eif3hb
si:dkey-30c15.10	3.69334e-16	0.640073	0.875	0.722	9.33269e-12	0	si:dkey-30c15.10
dcn	3.71654e-16	0.99727	0.898	0.851	9.39132e-12	0	dcn
setdb2	3.82711e-16	0.314871	0.438	0.222	9.67074e-12	0	setdb2
hsp90aa1.2	3.86908e-16	0.563412	0.347	0.16	9.77678e-12	0	hsp90aa1.2
prps1a	3.92717e-16	0.444608	0.787	0.664	9.92356e-12	0	prps1a
selenbp1	3.95841e-16	0.509402	0.95	0.845	1.00025e-11	0	selenbp1
hacd3	3.97369e-16	0.360595	0.633	0.44	1.00411e-11	0	hacd3
guk1a	4.01795e-16	1.28054	0.503	0.288	1.01529e-11	0	guk1a
spc24	4.12668e-16	0.665229	0.585	0.355	1.04277e-11	0	spc24
cyp1c1	4.15435e-16	0.9903	0.934	0.904	1.04976e-11	0	cyp1c1
tamm41	4.32881e-16	0.18082	0.392	0.185	1.09385e-11	0	tamm41
tcea1	4.48443e-16	0.292944	0.823	0.646	1.13317e-11	0	tcea1
rhbdd1	4.4987e-16	0.114188	0.279	0.101	1.13678e-11	0	rhbdd1
lrp1ab	4.50338e-16	0.789624	0.44	0.251	1.13796e-11	0	lrp1ab
pak1ip1	4.53641e-16	0.617182	0.438	0.219	1.14631e-11	0	pak1ip1
gtf2h3	4.56634e-16	0.577197	0.485	0.26	1.15387e-11	0	gtf2h3
LO018340.1	4.607e-16	1.90908	0.229	0.075	1.16414e-11	0	LO018340.1
nme6	4.66797e-16	0.443768	0.184	0.046	1.17955e-11	0	nme6
slc11a2	4.74001e-16	0.206166	0.909	0.796	1.19775e-11	0	slc11a2
tfip11	4.75078e-16	0.111667	0.766	0.597	1.20047e-11	0	tfip11
si:dkey-239h2.3	4.8003e-16	0.993281	0.254	0.086	1.21299e-11	0	si:dkey-239h2.3
arrdc3b	4.80599e-16	0.66804	0.8	0.646	1.21443e-11	0	arrdc3b
heatr3	4.86149e-16	0.712421	0.601	0.406	1.22845e-11	0	heatr3
slc17a9b	4.95948e-16	0.284058	0.383	0.185	1.25321e-11	0	slc17a9b
hirip3	5.05549e-16	1.7753	0.485	0.274	1.27747e-11	0	hirip3
thop1	5.10198e-16	0.615993	0.873	0.746	1.28922e-11	0	thop1
alkbh3	5.13092e-16	1.26231	0.315	0.127	1.29653e-11	0	alkbh3
oser1	5.17209e-16	0.742186	0.712	0.493	1.30694e-11	0	oser1
uqcc2	5.17929e-16	0.241148	0.44	0.207	1.30876e-11	0	uqcc2
ppil2	5.26311e-16	0.419027	0.671	0.455	1.32994e-11	0	ppil2
mrpl11	5.32972e-16	0.849581	0.447	0.226	1.34677e-11	0	mrpl11
samd11	5.33161e-16	0.485582	0.624	0.4	1.34724e-11	0	samd11
qrsl1	5.38129e-16	0.735852	0.381	0.182	1.3598e-11	0	qrsl1
hoxc8a	5.39323e-16	1.13286	0.336	0.149	1.36281e-11	0	hoxc8a
aldh4a1	5.53383e-16	1.8481	0.365	0.172	1.39834e-11	0	aldh4a1
dtymk	5.7615e-16	1.42597	0.442	0.23	1.45587e-11	0	dtymk
mrpl27	5.76475e-16	0.370122	0.388	0.172	1.45669e-11	0	mrpl27
sco1	5.78313e-16	0.940874	0.451	0.238	1.46134e-11	0	sco1
hbs1l	5.79487e-16	0.111883	0.746	0.571	1.4643e-11	0	hbs1l
mta3	5.90969e-16	0.533811	0.766	0.602	1.49332e-11	0	mta3
si:ch211-66k16.27	5.93174e-16	0.799089	0.556	0.329	1.49889e-11	0	si:ch211-66k16.27
CABZ01059119.1	6.21161e-16	2.01021	0.243	0.084	1.56961e-11	0	CABZ01059119.1
six1a	6.27256e-16	1.43157	0.209	0.063	1.58501e-11	0	six1a
zgc:112185	6.35908e-16	1.68983	0.234	0.076	1.60688e-11	0	zgc:112185
zgc:153675	6.3815e-16	0.352414	0.497	0.264	1.61254e-11	0	zgc:153675
pitrm1	6.38629e-16	0.235624	0.624	0.447	1.61375e-11	0	pitrm1
cnbpb	6.40864e-16	0.677739	0.989	0.958	1.6194e-11	0	cnbpb
cisd2	6.71954e-16	0.554303	0.553	0.309	1.69796e-11	0	cisd2
hspe1	6.72485e-16	0.749347	0.551	0.332	1.6993e-11	0	hspe1
ved	6.87879e-16	1.18981	0.279	0.109	1.7382e-11	0	ved
mrpl44	6.91648e-16	0.408027	0.703	0.499	1.74772e-11	0	mrpl44
ezh2	6.93041e-16	0.455772	0.846	0.7	1.75124e-11	0	ezh2
tpm1	6.94048e-16	0.714657	0.485	0.295	1.75379e-11	0	tpm1
spata22	7.01887e-16	1.86456	0.211	0.065	1.7736e-11	0	spata22
add2	7.0318e-16	0.162523	0.506	0.298	1.77687e-11	0	add2
atpaf2	7.04263e-16	1.28983	0.299	0.118	1.7796e-11	0	atpaf2
got2b	7.08418e-16	0.356618	0.805	0.684	1.7901e-11	0	got2b
hbae5	7.10032e-16	2.18362	0.175	0.044	1.79418e-11	0	hbae5
mrps24	7.29527e-16	0.702892	0.46	0.23	1.84344e-11	0	mrps24
glrx5	7.30599e-16	0.405726	0.785	0.606	1.84615e-11	0	glrx5
naxe	7.74254e-16	0.271571	0.551	0.319	1.95646e-11	0	naxe
dnmt3bb.2	8.03639e-16	1.66852	0.379	0.186	2.03071e-11	0	dnmt3bb.2
arl2bp	8.12882e-16	3.00133	0.134	0.023	2.05407e-11	0	arl2bp
lars1b	8.17944e-16	0.612216	0.671	0.474	2.06686e-11	0	lars1b
tmem176	8.28925e-16	0.640555	0.746	0.548	2.09461e-11	0	tmem176
si:dkeyp-113d7.1	8.29251e-16	0.328148	0.88	0.785	2.09543e-11	0	si:dkeyp-113d7.1
bambib	8.80392e-16	0.638891	0.658	0.516	2.22466e-11	0	bambib
thbs4b	8.8933e-16	3.66646	0.22	0.069	2.24725e-11	0	thbs4b
tmpoa	8.93641e-16	0.387646	0.898	0.773	2.25814e-11	0	tmpoa
pcf11	8.97755e-16	0.758202	0.732	0.537	2.26854e-11	0	pcf11
hnrnpabb	9.08818e-16	0.51586	1	0.994	2.29649e-11	0	hnrnpabb
gyg1a	9.14819e-16	0.622053	0.485	0.282	2.31166e-11	0	gyg1a
mcm9	9.55058e-16	2.66536	0.254	0.091	2.41334e-11	0	mcm9
slc16a10	1.01862e-15	0.690132	0.771	0.624	2.57396e-11	0	slc16a10
slc25a40	1.02806e-15	0.999216	0.34	0.149	2.59781e-11	0	slc25a40
prickle1a	1.07868e-15	0.148137	0.193	0.053	2.72571e-11	0	prickle1a
apela	1.08971e-15	2.07661	0.252	0.094	2.75359e-11	0	apela
cib2	1.0944e-15	1.51672	0.166	0.039	2.76545e-11	0	cib2
pagr1	1.10543e-15	0.739445	0.694	0.513	2.79332e-11	0	pagr1
eif2s1b	1.12402e-15	0.381078	0.95	0.854	2.84028e-11	0	eif2s1b
nipa2	1.12939e-15	0.253634	0.789	0.593	2.85385e-11	0	nipa2
rab5if	1.13068e-15	0.377102	0.728	0.514	2.85711e-11	0	rab5if
acap1	1.13846e-15	0.123779	0.406	0.2	2.87679e-11	0	acap1
rbb4l	1.15904e-15	0.453651	0.95	0.884	2.92878e-11	0	rbb4l
zgc:153935	1.16755e-15	1.07234	0.249	0.085	2.95028e-11	0	zgc:153935
ncln	1.17417e-15	0.231471	0.948	0.837	2.967e-11	0	ncln
hcfc1b	1.17748e-15	0.611347	0.964	0.894	2.97537e-11	0	hcfc1b
ckap4	1.18877e-15	0.457692	0.766	0.611	3.00389e-11	0	ckap4
klf9	1.21587e-15	1.12858	0.181	0.046	3.07239e-11	0	klf9
hsp90b1	1.23042e-15	0.237929	0.975	0.963	3.10915e-11	0	hsp90b1
lpcat2	1.25857e-15	0.542212	0.365	0.172	3.18028e-11	0	lpcat2
sod2	1.25986e-15	0.721238	0.379	0.18	3.18354e-11	0	sod2
morf4l1	1.2652e-15	0.353613	0.95	0.867	3.19703e-11	0	morf4l1
mphosph8	1.26655e-15	0.113811	0.769	0.568	3.20045e-11	0	mphosph8
ncdn	1.29316e-15	0.610322	0.578	0.373	3.26767e-11	0	ncdn
bckdhb	1.31129e-15	0.312758	0.839	0.683	3.31351e-11	0	bckdhb
ciao2a	1.31801e-15	0.753789	0.635	0.443	3.33048e-11	0	ciao2a
gpn2	1.34181e-15	0.200365	0.522	0.307	3.39061e-11	0	gpn2
cercam	1.38577e-15	0.449731	0.506	0.299	3.50171e-11	0	cercam
phyhiplb	1.38927e-15	0.942835	0.213	0.067	3.51054e-11	0	phyhiplb
isy1	1.39214e-15	0.368764	0.68	0.482	3.51779e-11	0	isy1
elac2	1.423e-15	0.426496	0.465	0.246	3.59579e-11	0	elac2
zgc:113208	1.45979e-15	0.456859	0.367	0.163	3.68875e-11	0	zgc:113208
lsm12a	1.47261e-15	0.67256	0.542	0.316	3.72113e-11	0	lsm12a
mrpl14	1.47649e-15	0.766719	0.392	0.177	3.73094e-11	0	mrpl14
dhx33	1.47651e-15	2.59654	0.256	0.091	3.731e-11	0	dhx33
bco1	1.48449e-15	0.654507	0.263	0.095	3.75115e-11	0	bco1
ptpreb	1.51968e-15	0.118886	0.279	0.109	3.84009e-11	0	ptpreb
glod4	1.52305e-15	0.681647	0.424	0.211	3.84859e-11	0	glod4
twnk	1.5242e-15	2.17159	0.372	0.178	3.8515e-11	0	twnk
MTERF4	1.56451e-15	0.443539	0.234	0.076	3.95335e-11	0	MTERF4
abt1	1.56838e-15	0.64332	0.372	0.171	3.96314e-11	0	abt1
stk3	1.57936e-15	0.315552	0.909	0.824	3.99088e-11	0	stk3
WDR70	1.60364e-15	0.284819	0.512	0.283	4.05224e-11	0	WDR70
ss18	1.62312e-15	0.309469	0.862	0.717	4.10147e-11	0	ss18
creg1	1.62932e-15	0.201444	0.669	0.507	4.11714e-11	0	creg1
ptmaa	1.63737e-15	0.496487	0.995	0.975	4.13746e-11	0	ptmaa
ppil1	1.65897e-15	0.481211	0.447	0.229	4.19205e-11	0	ppil1
ptcd1	1.65991e-15	0.699552	0.456	0.239	4.19444e-11	0	ptcd1
cdt1	1.66736e-15	0.730433	0.717	0.585	4.21326e-11	0	cdt1
si:dkeyp-82a1.6	1.67688e-15	0.401501	0.567	0.351	4.23731e-11	0	si:dkeyp-82a1.6
tmem14ca	1.72668e-15	0.849843	0.512	0.294	4.36316e-11	0	tmem14ca
snupn	1.73238e-15	0.594457	0.531	0.306	4.37755e-11	0	snupn
pcid2	1.74499e-15	0.782906	0.735	0.542	4.40941e-11	0	pcid2
orc6	1.79088e-15	0.818498	0.444	0.229	4.52537e-11	0	orc6
nfyc	1.8018e-15	0.309891	0.841	0.656	4.55298e-11	0	nfyc
si:dkey-50i6.5	1.81684e-15	1.35296	0.218	0.067	4.59098e-11	0	si:dkey-50i6.5
sema3fa	1.8382e-15	0.683904	0.562	0.385	4.64496e-11	0	sema3fa
arpc1b	1.95544e-15	0.634611	0.848	0.748	4.94121e-11	0	arpc1b
bms1	1.9889e-15	0.449942	0.683	0.505	5.02576e-11	0	bms1
alg3	2.00141e-15	0.190187	0.429	0.218	5.05736e-11	0	alg3
phb2b	2.10212e-15	0.487305	0.585	0.367	5.31185e-11	0	phb2b
pleca	2.11525e-15	1.1889	0.773	0.617	5.34502e-11	0	pleca
hnrnph1	2.11731e-15	0.472996	0.401	0.2	5.35022e-11	0	hnrnph1
TST	2.11858e-15	0.10741	0.624	0.399	5.35343e-11	0	TST
tmem39b	2.11922e-15	0.320515	0.669	0.457	5.35505e-11	0	tmem39b
pdxdc1	2.17147e-15	0.813826	0.429	0.22	5.48709e-11	0	pdxdc1
eaf2	2.23783e-15	0.429048	0.556	0.331	5.65476e-11	0	eaf2
cdo1	2.27354e-15	0.916252	0.463	0.275	5.745e-11	0	cdo1
brat1	2.27905e-15	0.268499	0.401	0.198	5.75892e-11	0	brat1
tyw5	2.28002e-15	0.365019	0.41	0.2	5.76139e-11	0	tyw5
si:ch211-160j14.3	2.30364e-15	3.78331	0.245	0.087	5.82106e-11	0	si:ch211-160j14.3
denr	2.31311e-15	0.514607	0.884	0.749	5.84499e-11	0	denr
maco1a	2.3518e-15	0.809004	0.562	0.341	5.94276e-11	0	maco1a
poglut1	2.36826e-15	0.682596	0.499	0.273	5.98435e-11	0	poglut1
ubap1	2.3691e-15	0.183967	0.841	0.706	5.98648e-11	0	ubap1
arhgap45b	2.39632e-15	1.3298	0.374	0.191	6.05527e-11	0	arhgap45b
fbn2b	2.40708e-15	0.145755	0.896	0.776	6.08245e-11	0	fbn2b
kcnq5b	2.4717e-15	0.805215	0.304	0.128	6.24573e-11	0	kcnq5b
cyp26a1	2.56698e-15	1.77135	0.517	0.361	6.48651e-11	0	cyp26a1
slc25a16	2.58579e-15	0.552806	0.49	0.271	6.53404e-11	0	slc25a16
nars1	2.58919e-15	0.375	0.912	0.842	6.54261e-11	0	nars1
nck2b	2.63558e-15	0.589563	0.515	0.334	6.65986e-11	0	nck2b
runx3	2.71192e-15	2.64421	0.159	0.037	6.85276e-11	0	runx3
plpp2b	2.72495e-15	0.498976	0.34	0.15	6.88567e-11	0	plpp2b
dph2	2.74426e-15	0.992815	0.399	0.195	6.93447e-11	0	dph2
mych	2.76303e-15	0.412415	0.791	0.669	6.98189e-11	0	mych
api5	2.77049e-15	0.301824	0.95	0.864	7.00074e-11	0	api5
hypk	2.81644e-15	0.667797	0.73	0.53	7.11686e-11	0	hypk
twist3	2.83504e-15	1.81527	0.492	0.325	7.16385e-11	0	twist3
xrcc6	2.83745e-15	0.76031	0.583	0.366	7.16996e-11	0	xrcc6
ppm1ab	2.85058e-15	0.439393	0.392	0.187	7.20312e-11	0	ppm1ab
rpl37:1	2.87547e-15	1.21721	0.272	0.101	7.26603e-11	0	rpl37:1
hadhaa	2.91131e-15	0.950406	0.56	0.349	7.3566e-11	0	hadhaa
metrnla	2.97751e-15	0.25629	0.791	0.603	7.52387e-11	0	metrnla
timeless	2.9915e-15	0.685023	0.646	0.425	7.55923e-11	0	timeless
psmc3ip	2.99755e-15	1.80387	0.281	0.113	7.57452e-11	0	psmc3ip
dctd	3.02543e-15	1.56675	0.49	0.279	7.64495e-11	0	dctd
gulp1a	3.02709e-15	0.534822	0.435	0.245	7.64915e-11	0	gulp1a
cox15	3.04954e-15	0.290678	0.68	0.458	7.70588e-11	0	cox15
prpf8	3.09241e-15	0.166294	0.896	0.769	7.81422e-11	0	prpf8
rae1	3.16681e-15	0.449197	0.841	0.692	8.00221e-11	0	rae1
hnrnpul1	3.2067e-15	0.308976	0.887	0.739	8.10302e-11	0	hnrnpul1
snapc2	3.244e-15	0.471581	0.311	0.13	8.19727e-11	0	snapc2
trmt2a	3.26757e-15	0.552001	0.417	0.211	8.25682e-11	0	trmt2a
chtf18	3.2765e-15	0.951906	0.426	0.226	8.2794e-11	0	chtf18
snx16	3.29484e-15	1.22627	0.333	0.147	8.32573e-11	0	snx16
ftsj3	3.29947e-15	0.243506	0.574	0.358	8.33742e-11	0	ftsj3
si:ch211-276c2.4	3.34243e-15	0.555756	0.503	0.281	8.44598e-11	0	si:ch211-276c2.4
nck1a	3.43024e-15	0.419471	0.757	0.604	8.66788e-11	0	nck1a
rpf1	3.46511e-15	0.50875	0.49	0.254	8.75598e-11	0	rpf1
senp2	3.49937e-15	0.340141	0.739	0.526	8.84255e-11	0	senp2
nudt21	3.57606e-15	0.557259	0.825	0.675	9.03634e-11	0	nudt21
ccdc120	3.74659e-15	0.671245	0.279	0.107	9.46726e-11	0	ccdc120
TADA1	3.77528e-15	0.463561	0.594	0.364	9.53976e-11	0	TADA1
vps50	3.7771e-15	0.546204	0.238	0.079	9.54436e-11	0	vps50
abraxas1	3.79164e-15	0.607453	0.401	0.198	9.5811e-11	0	abraxas1
enpp2	3.87012e-15	0.314514	0.349	0.164	9.77942e-11	0	enpp2
bud23	3.95307e-15	0.742331	0.413	0.211	9.98901e-11	0	bud23
osgep	3.9552e-15	0.760453	0.469	0.259	9.99439e-11	0	osgep
il12rb2l	3.96355e-15	0.37125	0.374	0.173	1.00155e-10	0	il12rb2l
espl1	3.99696e-15	0.957658	0.456	0.249	1.00999e-10	0	espl1
bmp4	4.01293e-15	1.42847	0.295	0.121	1.01403e-10	0	bmp4
cpsf2	4.03434e-15	0.294979	0.805	0.66	1.01944e-10	0	cpsf2
si:ch211-204c21.1	4.07164e-15	1.97328	0.129	0.023	1.02886e-10	0	si:ch211-204c21.1
echs1	4.10099e-15	0.128802	0.825	0.653	1.03628e-10	0	echs1
nol6	4.20519e-15	0.968038	0.612	0.414	1.06261e-10	0	nol6
pole3	4.22199e-15	0.587859	0.605	0.398	1.06685e-10	0	pole3
glod5	4.24691e-15	0.98805	0.231	0.076	1.07315e-10	0	glod5
ctr9	4.28505e-15	0.155408	0.857	0.727	1.08279e-10	0	ctr9
atf7ip2	4.29955e-15	0.35764	0.483	0.257	1.08645e-10	0	atf7ip2
sms	4.40728e-15	0.448595	0.549	0.342	1.11368e-10	0	sms
slc29a1b	4.4403e-15	1.34021	0.485	0.279	1.12202e-10	0	slc29a1b
echdc2	4.52202e-15	0.344101	0.306	0.13	1.14267e-10	0	echdc2
abcf2a	4.55109e-15	0.395725	0.989	0.957	1.15002e-10	0	abcf2a
stk10	4.69907e-15	1.03032	0.311	0.13	1.18741e-10	0	stk10
jade1	4.83658e-15	0.87412	0.556	0.33	1.22216e-10	0	jade1
stx17	4.89943e-15	0.907402	0.222	0.07	1.23804e-10	0	stx17
scpep1	4.90315e-15	0.276864	0.853	0.729	1.23898e-10	0	scpep1
prdx3	4.93898e-15	0.573327	0.855	0.74	1.24803e-10	0	prdx3
hoxc13a	4.9491e-15	0.445006	0.345	0.164	1.25059e-10	0	hoxc13a
p2ry12	5.1154e-15	4.14723	0.091	0.008	1.29261e-10	0	p2ry12
rpp25l	5.1949e-15	1.389	0.286	0.114	1.3127e-10	0	rpp25l
ddx24	5.26158e-15	0.609633	0.481	0.267	1.32955e-10	0	ddx24
tmpob	5.46118e-15	0.480857	0.853	0.678	1.37999e-10	0	tmpob
si:ch211-114l13.12	5.58728e-15	2.78627	0.143	0.03	1.41185e-10	0	si:ch211-114l13.12
aifm1	5.59847e-15	0.523784	0.592	0.389	1.41468e-10	0	aifm1
CABZ01054965.1	5.63463e-15	0.695547	0.66	0.452	1.42382e-10	0	CABZ01054965.1
slc6a16b	5.79148e-15	0.196709	0.388	0.193	1.46345e-10	0	slc6a16b
cbsb	5.81363e-15	0.735578	0.347	0.164	1.46905e-10	0	cbsb
adat2	5.87039e-15	0.405405	0.263	0.098	1.48339e-10	0	adat2
METTL18	5.88394e-15	0.715795	0.29	0.114	1.48681e-10	0	METTL18
msx1a	6.03917e-15	1.0012	0.302	0.125	1.52604e-10	0	msx1a
nlrc3	6.05963e-15	4.69559	0.136	0.026	1.53121e-10	0	nlrc3
pno1	6.14789e-15	0.366865	0.721	0.496	1.55351e-10	0	pno1
mrpl38	6.17502e-15	0.379737	0.617	0.419	1.56037e-10	0	mrpl38
aprt	6.26377e-15	0.700274	0.574	0.355	1.58279e-10	0	aprt
hoxd3a	6.31745e-15	0.813938	0.308	0.131	1.59636e-10	0	hoxd3a
mrps10	6.31863e-15	0.370488	0.531	0.298	1.59666e-10	0	mrps10
tex10	6.35517e-15	0.466081	0.78	0.638	1.60589e-10	0	tex10
pithd1	6.37137e-15	0.904037	0.224	0.073	1.60998e-10	0	pithd1
FRMD1	6.40216e-15	0.556571	0.231	0.081	1.61776e-10	0	FRMD1
si:dkeyp-26a9.2	6.4504e-15	1.14699	0.485	0.268	1.62995e-10	0	si:dkeyp-26a9.2
atp2a2a	6.55198e-15	1.07274	0.404	0.208	1.65562e-10	0	atp2a2a
mfap2	6.69042e-15	1.00603	0.717	0.591	1.6906e-10	0	mfap2
cirbpa	6.94868e-15	0.46146	1	0.971	1.75586e-10	0	cirbpa
rb1	6.98859e-15	0.587105	0.871	0.756	1.76595e-10	0	rb1
insrb	6.98981e-15	0.813021	0.288	0.117	1.76626e-10	0	insrb
mrps9	7.00281e-15	0.35603	0.626	0.426	1.76954e-10	0	mrps9
elp5	7.13014e-15	0.521496	0.376	0.179	1.80172e-10	0	elp5
CABZ01112656.1	7.31087e-15	0.309811	0.748	0.547	1.84738e-10	0	CABZ01112656.1
spns3	7.38848e-15	0.63564	0.154	0.035	1.867e-10	0	spns3
hexim1	7.44919e-15	0.323792	0.882	0.75	1.88234e-10	0	hexim1
larp7	7.58211e-15	0.311692	0.605	0.389	1.91592e-10	0	larp7
ddx19	7.66923e-15	0.426644	0.791	0.604	1.93794e-10	0	ddx19
aqr	7.68916e-15	0.12455	0.633	0.439	1.94297e-10	0	aqr
dph5	7.76982e-15	0.542169	0.388	0.195	1.96336e-10	0	dph5
gfi1aa	7.83734e-15	2.63162	0.274	0.112	1.98042e-10	0	gfi1aa
sfrp2	7.95532e-15	0.711572	0.324	0.147	2.01023e-10	0	sfrp2
bcl2a	8.07963e-15	0.196467	0.537	0.301	2.04164e-10	0	bcl2a
mrpl46	8.15212e-15	0.424261	0.349	0.161	2.05996e-10	0	mrpl46
tbx2a	8.17026e-15	3.35221	0.231	0.083	2.06454e-10	0	tbx2a
cdk9	8.3031e-15	0.285172	0.923	0.814	2.09811e-10	0	cdk9
hhla2a.1	8.42835e-15	3.05037	0.134	0.026	2.12976e-10	0	hhla2a.1
phb2a	8.49616e-15	0.569735	0.544	0.343	2.14689e-10	0	phb2a
syncrip	8.50201e-15	0.583122	0.873	0.721	2.14837e-10	0	syncrip
tril	8.54114e-15	0.890224	0.342	0.162	2.15826e-10	0	tril
adgrg6	8.55644e-15	1.06672	0.549	0.366	2.16213e-10	0	adgrg6
ssbp4	8.60649e-15	0.251836	0.746	0.609	2.17477e-10	0	ssbp4
stip1	8.66702e-15	0.185475	0.982	0.935	2.19007e-10	0	stip1
trmt61b	8.91552e-15	0.511371	0.279	0.11	2.25286e-10	0	trmt61b
rgs18	9.06327e-15	2.17557	0.118	0.019	2.2902e-10	0	rgs18
fkbp4	9.09358e-15	0.325769	0.848	0.712	2.29786e-10	0	fkbp4
col11a1b	9.27383e-15	0.386157	0.499	0.315	2.3434e-10	0	col11a1b
timm9	9.44597e-15	0.71826	0.467	0.246	2.3869e-10	0	timm9
eed	9.55456e-15	0.6118	0.796	0.618	2.41434e-10	0	eed
thumpd1	9.56722e-15	0.54601	0.687	0.503	2.41754e-10	0	thumpd1
nmt1a	9.62847e-15	0.136758	0.921	0.824	2.43302e-10	0	nmt1a
paxip1	9.79871e-15	0.807006	0.655	0.462	2.47604e-10	0	paxip1
nid2a	9.82184e-15	0.743551	0.635	0.444	2.48188e-10	0	nid2a
im:7150988	9.87909e-15	1.20925	0.467	0.255	2.49635e-10	0	im:7150988
txnrd3	9.89191e-15	0.289422	0.973	0.957	2.49959e-10	0	txnrd3
efcc1	9.92108e-15	0.998063	0.243	0.087	2.50696e-10	0	efcc1
rrbp1a	9.93003e-15	0.445604	0.862	0.755	2.50922e-10	0	rrbp1a
ran	9.98969e-15	0.492185	1	0.999	2.5243e-10	0	ran
ddt	1.0042e-14	0.446244	0.696	0.468	2.53751e-10	0	ddt
rgs14a	1.00773e-14	1.33731	0.238	0.085	2.54644e-10	0	rgs14a
atf4a	1.00981e-14	0.456699	0.932	0.844	2.55168e-10	0	atf4a
mrps18a	1.02355e-14	0.641791	0.549	0.339	2.58641e-10	0	mrps18a
ddx56	1.03279e-14	0.468539	0.655	0.459	2.60976e-10	0	ddx56
asph	1.07713e-14	0.784281	0.832	0.737	2.7218e-10	0	asph
dohh	1.08454e-14	0.41607	0.639	0.447	2.74053e-10	0	dohh
mpnd	1.08838e-14	0.771192	0.347	0.161	2.75022e-10	0	mpnd
cbx3a	1.09258e-14	0.495714	0.914	0.804	2.76084e-10	0	cbx3a
znf143a	1.12575e-14	0.260898	0.719	0.536	2.84467e-10	0	znf143a
scn4ba	1.12719e-14	3.42399	0.107	0.014	2.8483e-10	0	scn4ba
hdac8:1	1.13365e-14	1.00348	0.234	0.081	2.86462e-10	0	hdac8:1
tomm22	1.15766e-14	0.431066	0.812	0.652	2.92529e-10	0	tomm22
si:ch211-195h23.3	1.20452e-14	0.812545	0.395	0.194	3.0437e-10	0	si:ch211-195h23.3
gpn1	1.21346e-14	0.446065	0.526	0.305	3.06629e-10	0	gpn1
pcca	1.24982e-14	0.33672	0.703	0.531	3.15817e-10	0	pcca
abhd3	1.25372e-14	1.98004	0.166	0.042	3.16803e-10	0	abhd3
qdpra	1.27731e-14	0.949521	0.587	0.446	3.22763e-10	0	qdpra
nkrf	1.32175e-14	0.286925	0.712	0.508	3.33994e-10	0	nkrf
cnot9	1.34119e-14	0.432445	0.882	0.787	3.38905e-10	0	cnot9
ecrg4a	1.37202e-14	1.61519	0.336	0.158	3.46697e-10	0	ecrg4a
mis18a	1.37339e-14	0.778384	0.37	0.176	3.47041e-10	0	mis18a
si:ch211-286o17.1	1.41906e-14	0.50361	0.692	0.504	3.58582e-10	0	si:ch211-286o17.1
CABZ01111959.1	1.42572e-14	3.47385	0.104	0.013	3.60265e-10	0	CABZ01111959.1
crhr1	1.4279e-14	0.721758	0.268	0.108	3.60817e-10	0	crhr1
gfi1b	1.43471e-14	0.670578	0.186	0.053	3.62538e-10	0	gfi1b
psmd9	1.43784e-14	0.4169	0.644	0.422	3.63327e-10	0	psmd9
gopc	1.44062e-14	0.252805	0.499	0.278	3.64031e-10	0	gopc
naxd	1.45446e-14	0.46464	0.764	0.615	3.67528e-10	0	naxd
s1pr4	1.4585e-14	1.21151	0.188	0.056	3.68548e-10	0	s1pr4
dhrs13b.1:1	1.48999e-14	3.64033	0.134	0.026	3.76506e-10	0	dhrs13b.1:1
mrpl42	1.49197e-14	0.815399	0.32	0.135	3.77007e-10	0	mrpl42
gmpr2	1.50202e-14	0.516224	0.576	0.365	3.79546e-10	0	gmpr2
rac2	1.50614e-14	0.492089	0.701	0.529	3.80587e-10	0	rac2
CU469526.1	1.51343e-14	0.724652	0.526	0.342	3.82429e-10	0	CU469526.1
mfsd2ab	1.51939e-14	0.318779	0.599	0.388	3.83934e-10	0	mfsd2ab
si:ch211-214j24.10	1.53157e-14	0.463348	0.832	0.71	3.87012e-10	0	si:ch211-214j24.10
cytip	1.53382e-14	1.74632	0.177	0.048	3.8758e-10	0	cytip
eif2s2	1.54031e-14	0.53562	0.98	0.963	3.89221e-10	0	eif2s2
hoxb8a	1.6063e-14	0.680547	0.449	0.257	4.05895e-10	0	hoxb8a
zgc:174945	1.65293e-14	0.413293	0.204	0.064	4.1768e-10	0	zgc:174945
upf1	1.65533e-14	0.225524	0.828	0.649	4.18285e-10	0	upf1
ppih	1.70297e-14	0.284674	0.671	0.45	4.30323e-10	0	ppih
preb	1.71257e-14	0.439184	0.603	0.429	4.3275e-10	0	preb
tusc2b	1.73231e-14	0.178659	0.617	0.373	4.37738e-10	0	tusc2b
chchd3b	1.77398e-14	1.10359	0.354	0.165	4.48267e-10	0	chchd3b
stambpa	1.78526e-14	0.104618	0.615	0.405	4.51118e-10	0	stambpa
cog2	1.82379e-14	0.466706	0.605	0.389	4.60855e-10	0	cog2
ptger2b	1.85879e-14	1.17335	0.132	0.025	4.69698e-10	0	ptger2b
ccl38.6	1.88392e-14	3.75233	0.116	0.019	4.76049e-10	0	ccl38.6
tssc4	1.90256e-14	0.249554	0.751	0.546	4.80758e-10	0	tssc4
cops2	1.95233e-14	0.380072	0.862	0.706	4.93333e-10	0	cops2
sh3pxd2ab	1.96201e-14	1.61301	0.286	0.118	4.95782e-10	0	sh3pxd2ab
coq2	1.96288e-14	0.737873	0.358	0.173	4.96e-10	0	coq2
vrk1	1.97502e-14	0.929791	0.44	0.237	4.99068e-10	0	vrk1
tbl3	1.98723e-14	0.254385	0.717	0.59	5.02152e-10	0	tbl3
ak3	2.00192e-14	0.274191	0.601	0.398	5.05866e-10	0	ak3
utp23	2.02271e-14	0.286782	0.322	0.14	5.11117e-10	0	utp23
gstm.1	2.02733e-14	0.671483	0.512	0.304	5.12285e-10	0	gstm.1
ecm2	2.02742e-14	3.06515	0.111	0.017	5.12308e-10	0	ecm2
supt16h	2.07344e-14	0.394682	0.728	0.504	5.23937e-10	0	supt16h
primpol	2.08403e-14	0.796969	0.497	0.289	5.26614e-10	0	primpol
tut1	2.08876e-14	1.45757	0.463	0.261	5.27808e-10	0	tut1
caspa	2.12366e-14	1.97946	0.181	0.053	5.36627e-10	0	caspa
pepd	2.1318e-14	0.452268	0.794	0.664	5.38685e-10	0	pepd
arhgef39	2.1367e-14	0.877315	0.565	0.362	5.39923e-10	0	arhgef39
pag1	2.1456e-14	1.16803	0.517	0.33	5.42172e-10	0	pag1
C18H19orf12:1	2.16348e-14	3.78921	0.147	0.034	5.46689e-10	0	C18H19orf12:1
ndufaf1	2.18452e-14	0.555743	0.605	0.393	5.52005e-10	0	ndufaf1
ptpn13	2.20175e-14	1.40662	0.327	0.145	5.56359e-10	0	ptpn13
znf1143	2.2155e-14	0.452505	0.338	0.152	5.59835e-10	0	znf1143
tigarb	2.24381e-14	0.814491	0.202	0.063	5.66989e-10	0	tigarb
dcp2	2.24463e-14	0.757516	0.692	0.476	5.67196e-10	0	dcp2
pld7	2.26175e-14	0.352005	0.696	0.488	5.71523e-10	0	pld7
prelid1a	2.27597e-14	0.204047	0.844	0.682	5.75115e-10	0	prelid1a
hoxc13b	2.35221e-14	0.399669	0.317	0.141	5.94379e-10	0	hoxc13b
ptcd3	2.35739e-14	0.341902	0.503	0.292	5.9569e-10	0	ptcd3
rnf139	2.35967e-14	0.324	0.483	0.277	5.96265e-10	0	rnf139
spon1b	2.36825e-14	2.23284	0.286	0.122	5.98433e-10	0	spon1b
ripply1	2.38256e-14	0.668671	0.213	0.069	6.02048e-10	0	ripply1
mrps35	2.38687e-14	0.307568	0.467	0.264	6.03137e-10	0	mrps35
zdhhc4	2.39624e-14	0.437121	0.546	0.325	6.05507e-10	0	zdhhc4
chrac1	2.41666e-14	0.422202	0.526	0.311	6.10667e-10	0	chrac1
fam169ab	2.43515e-14	0.771571	0.404	0.215	6.15338e-10	0	fam169ab
snrpd1	2.43862e-14	0.553906	0.857	0.683	6.16216e-10	0	snrpd1
capn2b	2.51901e-14	0.123875	0.497	0.303	6.36529e-10	0	capn2b
cops7a	2.55426e-14	0.280819	0.803	0.618	6.45436e-10	0	cops7a
xrn2	2.55763e-14	0.217204	0.884	0.718	6.46287e-10	0	xrn2
bzw1b	2.58432e-14	0.357844	0.968	0.92	6.53032e-10	0	bzw1b
cops5	2.59615e-14	0.176735	0.782	0.583	6.56022e-10	0	cops5
atrip	2.60268e-14	1.35745	0.338	0.156	6.57671e-10	0	atrip
swi5	2.6104e-14	1.84087	0.213	0.07	6.59623e-10	0	swi5
hmgn2	2.65022e-14	0.250485	1	1	6.69685e-10	0	hmgn2
fn1a	2.70295e-14	1.67809	0.662	0.438	6.83007e-10	0	fn1a
gtf3c5	2.70488e-14	0.37951	0.388	0.19	6.83497e-10	0	gtf3c5
nmd3	2.75701e-14	0.313927	0.424	0.222	6.96668e-10	0	nmd3
pmp22a	2.76066e-14	0.550507	0.993	0.983	6.97591e-10	0	pmp22a
tctn1	2.78052e-14	0.625623	0.179	0.051	7.02609e-10	0	tctn1
bend3	2.78859e-14	0.931163	0.451	0.254	7.04649e-10	0	bend3
nlrc3l1	2.81104e-14	0.991497	0.492	0.285	7.10321e-10	0	nlrc3l1
alkbh8	2.81971e-14	0.799166	0.245	0.089	7.12513e-10	0	alkbh8
cyp46a1.1	2.85266e-14	0.912691	0.204	0.064	7.20838e-10	0	cyp46a1.1
rad50	2.85566e-14	0.596819	0.481	0.276	7.21596e-10	0	rad50
fbxo5	2.88864e-14	1.23434	0.637	0.418	7.2993e-10	0	fbxo5
ube2ib	2.90917e-14	0.338681	0.955	0.857	7.35118e-10	0	ube2ib
UNC5C	3.10785e-14	2.62381	0.222	0.078	7.85322e-10	0	UNC5C
aldh6a1	3.12868e-14	0.181491	0.937	0.888	7.90587e-10	0	aldh6a1
ptgr1	3.13966e-14	0.606511	0.596	0.387	7.93361e-10	0	ptgr1
nme3	3.15441e-14	0.622434	0.594	0.375	7.97087e-10	0	nme3
pfn1	3.23064e-14	0.833862	0.968	0.936	8.1635e-10	0	pfn1
bloc1s4	3.26505e-14	0.171918	0.503	0.278	8.25045e-10	0	bloc1s4
ldlrap1a	3.28206e-14	0.620483	0.288	0.118	8.29345e-10	0	ldlrap1a
si:dkey-35m8.1	3.29842e-14	1.49998	0.202	0.065	8.33479e-10	0	si:dkey-35m8.1
mtpap	3.31725e-14	1.27401	0.234	0.083	8.38236e-10	0	mtpap
fermt3b	3.42136e-14	1.92632	0.2	0.064	8.64544e-10	0	fermt3b
nubp2	3.4375e-14	0.620603	0.447	0.237	8.68623e-10	0	nubp2
si:dkey-150i13.2	3.46095e-14	0.498273	0.197	0.061	8.74547e-10	0	si:dkey-150i13.2
slc3a2b	3.47013e-14	0.542224	0.683	0.554	8.76868e-10	0	slc3a2b
cbfb	3.52665e-14	0.768232	0.497	0.296	8.9115e-10	0	cbfb
suds3	3.52792e-14	0.165864	0.791	0.607	8.91471e-10	0	suds3
paics	3.5773e-14	0.148758	0.512	0.315	9.03948e-10	0	paics
arg2	3.57988e-14	4.03016	0.111	0.018	9.04599e-10	0	arg2
dhx37	3.59615e-14	0.566912	0.469	0.267	9.08712e-10	0	dhx37
sdc2	3.65519e-14	0.600476	0.649	0.461	9.2363e-10	0	sdc2
mycb	3.65679e-14	1.00554	0.342	0.162	9.24035e-10	0	mycb
ruvbl2	3.70027e-14	0.602812	0.592	0.4	9.35022e-10	0	ruvbl2
tmem222b	3.73297e-14	1.60815	0.175	0.048	9.43284e-10	0	tmem222b
fkbpl	3.75231e-14	1.18606	0.245	0.088	9.48171e-10	0	fkbpl
gpkow	3.76386e-14	0.164071	0.735	0.536	9.51089e-10	0	gpkow
ucp1	3.76618e-14	1.87422	0.508	0.353	9.51676e-10	0	ucp1
itgb1bp1	3.84886e-14	0.335453	0.553	0.34	9.72569e-10	0	itgb1bp1
zgc:114181	3.93221e-14	2.62508	0.161	0.042	9.93631e-10	0	zgc:114181
si:ch211-250g4.3	3.94018e-14	1.75935	0.247	0.096	9.95644e-10	0	si:ch211-250g4.3
camk2g2	3.95327e-14	0.177308	0.726	0.516	9.98953e-10	0	camk2g2
aldh7a1	4.0919e-14	0.361764	0.755	0.635	1.03398e-09	0	aldh7a1
nup205	4.10622e-14	0.495021	0.782	0.629	1.0376e-09	0	nup205
nenf	4.157e-14	0.256003	0.63	0.431	1.05043e-09	0	nenf
greb1l	4.20797e-14	0.129816	0.327	0.147	1.06331e-09	0	greb1l
ormdl1	4.21264e-14	0.438272	0.719	0.487	1.06449e-09	0	ormdl1
exosc4	4.24045e-14	0.15877	0.46	0.264	1.07152e-09	0	exosc4
erap1a	4.25647e-14	0.348373	0.272	0.108	1.07557e-09	0	erap1a
il13ra2	4.31589e-14	0.643016	0.828	0.717	1.09058e-09	0	il13ra2
ttc5	4.32387e-14	0.464219	0.356	0.168	1.0926e-09	0	ttc5
ddx59	4.39346e-14	0.225478	0.286	0.116	1.11018e-09	0	ddx59
mrps26	4.42688e-14	0.314048	0.501	0.281	1.11863e-09	0	mrps26
dus3l	4.47157e-14	0.481722	0.449	0.244	1.12992e-09	0	dus3l
plgrkt	4.52642e-14	0.426962	0.488	0.281	1.14378e-09	0	plgrkt
luc7l3	4.55856e-14	0.235379	0.719	0.53	1.1519e-09	0	luc7l3
si:dkey-258f14.2	4.61322e-14	1.61125	0.125	0.023	1.16571e-09	0	si:dkey-258f14.2
mrpl22	4.66654e-14	0.855199	0.388	0.188	1.17919e-09	0	mrpl22
mpl	4.68515e-14	1.71144	0.181	0.054	1.18389e-09	0	mpl
kmt5c	4.72258e-14	0.18298	0.701	0.495	1.19335e-09	0	kmt5c
lrrc58b	4.77303e-14	0.698551	0.526	0.323	1.2061e-09	0	lrrc58b
alkbh6	4.77873e-14	0.768641	0.263	0.101	1.20754e-09	0	alkbh6
usp14	4.79492e-14	0.245692	0.941	0.845	1.21163e-09	0	usp14
fbln5	4.82583e-14	1.97379	0.272	0.114	1.21944e-09	0	fbln5
sart1	4.86425e-14	0.180241	0.898	0.77	1.22915e-09	0	sart1
fthl28	4.90636e-14	0.971561	0.868	0.796	1.23979e-09	0	fthl28
hnrnpa1b	4.93936e-14	0.626833	0.594	0.375	1.24813e-09	0	hnrnpa1b
hs2st1a	5.01163e-14	1.00119	0.476	0.264	1.26639e-09	0	hs2st1a
si:cabz01036022.1	5.01194e-14	0.55527	0.147	0.034	1.26647e-09	0	si:cabz01036022.1
macrod2	5.01738e-14	0.448152	0.361	0.166	1.26784e-09	0	macrod2
mrpl45	5.05503e-14	0.587923	0.571	0.366	1.27736e-09	0	mrpl45
atp2b1a	5.0964e-14	0.21488	0.617	0.419	1.28781e-09	0	atp2b1a
tma7	5.18372e-14	0.468215	0.85	0.653	1.30987e-09	0	tma7
zgc:112496	5.21384e-14	1.45164	0.234	0.085	1.31749e-09	0	zgc:112496
tmem120a	5.23291e-14	0.424542	0.474	0.263	1.3223e-09	0	tmem120a
zgc:114200	5.27666e-14	0.384047	0.617	0.413	1.33336e-09	0	zgc:114200
sec22ba	5.29619e-14	0.556766	0.404	0.208	1.33829e-09	0	sec22ba
melk	5.35233e-14	0.674865	0.499	0.289	1.35248e-09	0	melk
aar2	5.35396e-14	0.159607	0.515	0.299	1.35289e-09	0	aar2
ahsa1b	5.3802e-14	0.39093	0.794	0.644	1.35952e-09	0	ahsa1b
m6pr	5.38352e-14	0.251991	0.612	0.397	1.36036e-09	0	m6pr
ncs1a	5.47958e-14	1.80078	0.236	0.087	1.38464e-09	0	ncs1a
pbk	5.51343e-14	0.394755	0.628	0.416	1.39319e-09	0	pbk
polr3f	5.5665e-14	0.710508	0.44	0.238	1.4066e-09	0	polr3f
FQ976913.1	5.80265e-14	0.751689	0.215	0.072	1.46627e-09	0	FQ976913.1
rp2	5.8203e-14	0.272888	0.558	0.356	1.47073e-09	0	rp2
MRPL49	5.82545e-14	0.327817	0.351	0.157	1.47203e-09	0	MRPL49
aurkaip1	5.84602e-14	0.307463	0.673	0.454	1.47723e-09	0	aurkaip1
rbm12b	5.92452e-14	0.407374	0.601	0.398	1.49707e-09	0	rbm12b
prpf31	5.93318e-14	0.294215	0.816	0.625	1.49926e-09	0	prpf31
ogg1	5.97546e-14	1.01018	0.206	0.066	1.50994e-09	0	ogg1
cycsb	6.07807e-14	0.597971	0.785	0.619	1.53587e-09	0	cycsb
cox8b	6.11894e-14	1.29181	0.129	0.025	1.54619e-09	0	cox8b
timm8a	6.1377e-14	0.916494	0.363	0.173	1.55094e-09	0	timm8a
nkx2.3	6.21654e-14	0.656805	0.592	0.413	1.57086e-09	0	nkx2.3
lsm7	6.21976e-14	0.55043	0.803	0.592	1.57167e-09	0	lsm7
gcsha	6.23569e-14	0.630567	0.571	0.359	1.5757e-09	0	gcsha
asb2b	6.24243e-14	1.70007	0.209	0.068	1.5774e-09	0	asb2b
usp10	6.34172e-14	0.221729	0.971	0.908	1.60249e-09	0	usp10
zgc:174863	6.34575e-14	0.344887	0.456	0.248	1.60351e-09	0	zgc:174863
anapc5	6.42363e-14	0.315939	0.601	0.391	1.62319e-09	0	anapc5
si:dkey-112a7.4	6.44384e-14	0.182007	0.497	0.273	1.62829e-09	0	si:dkey-112a7.4
rap1gap2a	6.47668e-14	1.52064	0.209	0.069	1.63659e-09	0	rap1gap2a
prss16	6.55796e-14	0.318941	0.649	0.458	1.65713e-09	0	prss16
mtres1	6.5901e-14	0.330668	0.363	0.174	1.66525e-09	0	mtres1
znf598	6.63806e-14	0.223613	0.805	0.675	1.67737e-09	0	znf598
cdc123	6.73075e-14	0.277958	0.39	0.19	1.70079e-09	0	cdc123
gpx1b	7.06277e-14	2.63013	0.118	0.021	1.78469e-09	0	gpx1b
sema3fb	7.27617e-14	0.323202	0.596	0.409	1.83861e-09	0	sema3fb
si:dkey-122a22.2	7.29318e-14	0.459695	0.456	0.242	1.84291e-09	0	si:dkey-122a22.2
mtrex	7.44067e-14	0.397123	0.667	0.491	1.88018e-09	0	mtrex
kat7b	7.54623e-14	0.334474	0.776	0.616	1.90686e-09	0	kat7b
psma6b	7.76874e-14	0.298248	0.73	0.523	1.96308e-09	0	psma6b
pdcd4a	7.89349e-14	0.221874	0.753	0.618	1.99461e-09	0	pdcd4a
uggt1	8.00763e-14	0.560761	0.481	0.267	2.02345e-09	0	uggt1
si:ch73-308l14.2	8.02881e-14	0.165565	0.456	0.264	2.0288e-09	0	si:ch73-308l14.2
si:dkey-111e8.1	8.06898e-14	0.662594	0.562	0.353	2.03895e-09	0	si:dkey-111e8.1
si:dkey-238c7.16	8.10248e-14	0.666117	0.494	0.305	2.04741e-09	0	si:dkey-238c7.16
si:dkey-172h23.2	8.12122e-14	0.902966	0.444	0.248	2.05215e-09	0	si:dkey-172h23.2
kdelr3	8.1554e-14	0.347281	0.546	0.351	2.06079e-09	0	kdelr3
dus4l	8.22331e-14	0.779313	0.32	0.143	2.07795e-09	0	dus4l
htatsf1	8.23408e-14	0.848524	0.637	0.436	2.08067e-09	0	htatsf1
zw10	8.41537e-14	0.84703	0.707	0.516	2.12648e-09	0	zw10
pik3ap1	8.4363e-14	0.721842	0.27	0.11	2.13177e-09	0	pik3ap1
CABZ01046432.1	8.78298e-14	4.7953	0.107	0.017	2.21937e-09	0	CABZ01046432.1
ccnh	8.7898e-14	0.70244	0.317	0.141	2.22109e-09	0	ccnh
ift80	8.86218e-14	0.546072	0.372	0.187	2.23938e-09	0	ift80
clec19a	8.89826e-14	2.08835	0.249	0.099	2.2485e-09	0	clec19a
BX572619.1	8.93376e-14	0.503368	0.68	0.493	2.25747e-09	0	BX572619.1
pms1	9.05868e-14	1.45515	0.299	0.132	2.28904e-09	0	pms1
trmu	9.36969e-14	0.767199	0.209	0.068	2.36763e-09	0	trmu
si:ch211-153a8.4	9.42673e-14	1.80065	0.333	0.165	2.38204e-09	0	si:ch211-153a8.4
si:ch211-150o23.2	9.50513e-14	0.31287	0.379	0.185	2.40185e-09	0	si:ch211-150o23.2
eif2b4	9.53251e-14	0.247837	0.735	0.565	2.40877e-09	0	eif2b4
snrpd3l	9.74322e-14	0.478276	0.685	0.457	2.46201e-09	0	snrpd3l
alkbh2	9.86522e-14	0.898757	0.175	0.05	2.49284e-09	0	alkbh2
prpf4	9.89441e-14	0.135754	0.744	0.55	2.50022e-09	0	prpf4
e2f3	9.94169e-14	0.423763	0.655	0.453	2.51216e-09	0	e2f3
PLBD2	9.99015e-14	0.28447	0.737	0.548	2.52441e-09	0	PLBD2
pmpca	1.00744e-13	0.270364	0.723	0.521	2.5457e-09	0	pmpca
CABZ01032476.1	1.02674e-13	0.332707	0.288	0.119	2.59446e-09	0	CABZ01032476.1
slc35d1b	1.05823e-13	0.34366	0.329	0.151	2.67403e-09	0	slc35d1b
wnt5b	1.10152e-13	0.773083	0.44	0.24	2.78343e-09	0	wnt5b
im:7152348	1.10602e-13	2.10377	0.195	0.062	2.7948e-09	0	im:7152348
trmt112	1.12754e-13	0.437658	0.488	0.284	2.84919e-09	0	trmt112
kif15	1.15462e-13	1.12553	0.703	0.536	2.91762e-09	0	kif15
arid4a	1.15685e-13	0.187374	0.857	0.7	2.92323e-09	0	arid4a
usp5	1.16249e-13	0.283545	0.964	0.892	2.93748e-09	0	usp5
itgb1b.2	1.1633e-13	1.36535	0.367	0.187	2.93955e-09	0	itgb1b.2
imp3	1.17161e-13	0.77947	0.299	0.125	2.96054e-09	0	imp3
crip1	1.18446e-13	0.285741	0.342	0.161	2.99301e-09	0	crip1
pycr1b	1.23977e-13	1.49645	0.297	0.138	3.13278e-09	0	pycr1b
txndc15	1.26062e-13	0.148026	0.791	0.605	3.18547e-09	0	txndc15
clns1a	1.27363e-13	0.183671	0.88	0.741	3.21835e-09	0	clns1a
cenpt	1.29309e-13	1.16147	0.42	0.224	3.26752e-09	0	cenpt
knop1	1.33869e-13	1.173	0.317	0.142	3.38272e-09	0	knop1
mier1a	1.33946e-13	0.616843	0.68	0.47	3.38467e-09	0	mier1a
nr2f6a	1.34008e-13	0.619481	0.853	0.728	3.38626e-09	0	nr2f6a
ankfy1	1.34162e-13	1.55728	0.444	0.248	3.39015e-09	0	ankfy1
fut7	1.36262e-13	3.23543	0.111	0.019	3.4432e-09	0	fut7
si:ch211-207i1.2	1.37057e-13	1.75871	0.179	0.055	3.4633e-09	0	si:ch211-207i1.2
spout1	1.3808e-13	0.63412	0.34	0.161	3.48915e-09	0	spout1
mrm3a	1.38267e-13	1.3585	0.247	0.095	3.49388e-09	0	mrm3a
bcl6ab	1.38651e-13	0.237026	0.442	0.248	3.50357e-09	0	bcl6ab
slc25a33	1.39302e-13	0.553813	0.546	0.348	3.52002e-09	0	slc25a33
ngdn	1.4132e-13	0.328574	0.524	0.284	3.571e-09	0	ngdn
zgc:158328	1.41741e-13	0.32109	0.465	0.275	3.58164e-09	0	zgc:158328
lsm14ab	1.43917e-13	0.129462	0.891	0.789	3.63663e-09	0	lsm14ab
dnaja1	1.45887e-13	0.348611	0.415	0.215	3.68641e-09	0	dnaja1
cnot8	1.46297e-13	0.467901	0.735	0.557	3.69679e-09	0	cnot8
mrps5	1.48883e-13	0.790798	0.596	0.416	3.76211e-09	0	mrps5
mtch2	1.51412e-13	0.227718	0.857	0.712	3.82603e-09	0	mtch2
fgf10a	1.52101e-13	0.332555	0.349	0.169	3.84344e-09	0	fgf10a
hoxb9a	1.52208e-13	0.503763	0.313	0.14	3.84615e-09	0	hoxb9a
coil	1.52725e-13	1.66861	0.24	0.091	3.85921e-09	0	coil
r3hdml	1.53053e-13	1.92337	0.138	0.031	3.86751e-09	0	r3hdml
ccnf	1.53451e-13	0.690044	0.619	0.432	3.87755e-09	0	ccnf
tefa	1.60343e-13	0.112489	0.776	0.55	4.0517e-09	0	tefa
fanci	1.62589e-13	1.89117	0.444	0.259	4.10845e-09	0	fanci
pde7a	1.63e-13	0.469332	0.49	0.307	4.11884e-09	0	pde7a
spdl1	1.64324e-13	0.415729	0.626	0.413	4.15231e-09	0	spdl1
bmp2a	1.64557e-13	0.197594	0.429	0.244	4.15818e-09	0	bmp2a
pelo	1.6506e-13	0.395005	0.678	0.516	4.1709e-09	0	pelo
ankrd54	1.66536e-13	0.424307	0.687	0.513	4.20821e-09	0	ankrd54
neil3	1.66857e-13	1.13429	0.442	0.249	4.21631e-09	0	neil3
znf318	1.67835e-13	0.399134	0.694	0.485	4.24102e-09	0	znf318
xylt2	1.68088e-13	0.179442	0.263	0.106	4.24742e-09	0	xylt2
rpap3	1.6923e-13	0.773631	0.492	0.306	4.27627e-09	0	rpap3
ppp1r11	1.70679e-13	1.23137	0.381	0.191	4.3129e-09	0	ppp1r11
b2ml	1.72355e-13	0.672494	0.673	0.459	4.35523e-09	0	b2ml
hey2	1.73217e-13	0.257153	0.531	0.322	4.37701e-09	0	hey2
bud13	1.73549e-13	0.934222	0.413	0.217	4.38541e-09	0	bud13
mmaa	1.74045e-13	0.534663	0.42	0.231	4.39793e-09	0	mmaa
cyp1c2	1.79923e-13	1.17685	0.435	0.238	4.54648e-09	0	cyp1c2
si:ch211-119e14.1	1.83616e-13	0.349059	0.313	0.134	4.6398e-09	0	si:ch211-119e14.1
tipin	1.83881e-13	1.18885	0.578	0.369	4.64649e-09	0	tipin
rif1	1.84543e-13	0.599473	0.596	0.409	4.66323e-09	0	rif1
aldh18a1	1.85498e-13	0.268482	0.537	0.385	4.68734e-09	0	aldh18a1
cep152	1.89251e-13	2.62446	0.308	0.141	4.78218e-09	0	cep152
gmps	1.90685e-13	0.494705	0.773	0.624	4.81841e-09	0	gmps
pdia4	1.9326e-13	0.151763	0.875	0.765	4.88348e-09	0	pdia4
wee1	1.93675e-13	0.221328	0.673	0.474	4.89398e-09	0	wee1
rtn4b	1.95766e-13	0.110115	0.726	0.565	4.94682e-09	0	rtn4b
ehbp1l1a	1.97055e-13	0.647941	0.367	0.18	4.97938e-09	0	ehbp1l1a
spryd4	1.98194e-13	0.996533	0.354	0.171	5.00818e-09	0	spryd4
mrpl23	1.98964e-13	0.219307	0.658	0.459	5.02761e-09	0	mrpl23
tmem123	1.99948e-13	2.18547	0.122	0.024	5.05249e-09	0	tmem123
qpctla	2.02089e-13	0.117759	0.705	0.529	5.1066e-09	0	qpctla
tomm40	2.09983e-13	0.392747	0.918	0.82	5.30605e-09	0	tomm40
twist1a	2.11034e-13	1.5134	0.41	0.235	5.33263e-09	0	twist1a
stx11a	2.11105e-13	0.249283	0.34	0.156	5.33442e-09	0	stx11a
acp1	2.11925e-13	0.278747	0.751	0.605	5.35513e-09	0	acp1
mhc1zba	2.13182e-13	0.46744	0.574	0.4	5.38689e-09	0	mhc1zba
si:dkey-253d23.2	2.13867e-13	1.02814	0.299	0.131	5.40421e-09	0	si:dkey-253d23.2
mrrf	2.16557e-13	1.71396	0.32	0.151	5.47217e-09	0	mrrf
e2f4	2.17038e-13	0.340356	0.642	0.448	5.48434e-09	0	e2f4
atp13a1	2.18549e-13	0.21998	0.834	0.699	5.5225e-09	0	atp13a1
btr31	2.2174e-13	3.33014	0.111	0.019	5.60316e-09	0	btr31
cfdp1	2.21887e-13	0.442879	0.374	0.186	5.60686e-09	0	cfdp1
foxf1	2.23476e-13	0.725242	0.54	0.36	5.64702e-09	0	foxf1
sb:cb81	2.25847e-13	0.322753	0.8	0.705	5.70693e-09	0	sb:cb81
ndufaf2	2.28195e-13	0.830758	0.277	0.112	5.76626e-09	0	ndufaf2
srek1ip1	2.30515e-13	0.768375	0.299	0.129	5.82489e-09	0	srek1ip1
enah	2.32155e-13	1.68854	0.12	0.023	5.86632e-09	0	enah
irf2bp2b	2.33827e-13	0.155073	0.961	0.876	5.90858e-09	0	irf2bp2b
nup155	2.36013e-13	0.82167	0.456	0.257	5.96381e-09	0	nup155
pi4k2a	2.38254e-13	0.423166	0.601	0.385	6.02044e-09	0	pi4k2a
rbm39a	2.38608e-13	0.274052	0.961	0.901	6.0294e-09	0	rbm39a
synj2bp	2.39729e-13	0.194839	0.58	0.371	6.05772e-09	0	synj2bp
si:ch211-210b2.1	2.43597e-13	0.10886	0.265	0.103	6.15544e-09	0	si:ch211-210b2.1
phf10	2.43609e-13	0.463887	0.66	0.458	6.15576e-09	0	phf10
msrb1a	2.45342e-13	1.84443	0.161	0.044	6.19954e-09	0	msrb1a
pkn1b	2.45582e-13	3.58943	0.175	0.053	6.2056e-09	0	pkn1b
scfd1	2.46919e-13	0.361627	0.698	0.541	6.2394e-09	0	scfd1
si:dkey-148a17.6	2.48288e-13	1.16222	0.204	0.067	6.27399e-09	0	si:dkey-148a17.6
tbx16l	2.55358e-13	1.64544	0.302	0.141	6.45263e-09	0	tbx16l
nutf2	2.5715e-13	0.248846	0.902	0.779	6.49791e-09	0	nutf2
tmem254	2.57521e-13	0.403556	0.356	0.166	6.50729e-09	0	tmem254
arhgap11a	2.58536e-13	0.494029	0.567	0.364	6.53295e-09	0	arhgap11a
thbs1b	2.59438e-13	0.568642	0.95	0.899	6.55575e-09	0	thbs1b
jak3	2.64316e-13	2.04863	0.147	0.037	6.67899e-09	0	jak3
kcnab1b	2.65298e-13	2.91988	0.104	0.017	6.70382e-09	0	kcnab1b
idh3g	2.65347e-13	0.55773	0.683	0.504	6.70506e-09	0	idh3g
ccn2a	2.66221e-13	0.135723	0.805	0.658	6.72714e-09	0	ccn2a
polr3a	2.67374e-13	1.46831	0.288	0.122	6.75626e-09	0	polr3a
id2a	2.67682e-13	0.255963	0.805	0.651	6.76406e-09	0	id2a
ghdc	2.67807e-13	1.11621	0.079	0.007	6.76721e-09	0	ghdc
jak2a	2.71275e-13	0.505091	0.603	0.394	6.85484e-09	0	jak2a
alg2	2.78289e-13	0.82776	0.415	0.223	7.03209e-09	0	alg2
tbxa2r	2.81435e-13	2.27225	0.102	0.015	7.11157e-09	0	tbxa2r
chn2	2.84974e-13	3.01302	0.102	0.015	7.201e-09	0	chn2
eif4ebp3l	2.86832e-13	0.927843	0.478	0.281	7.24795e-09	0	eif4ebp3l
p3h4	2.86993e-13	0.572209	0.376	0.187	7.25204e-09	0	p3h4
ISCU	2.88792e-13	0.207424	0.71	0.481	7.2975e-09	0	ISCU
mrps14	2.9419e-13	0.921016	0.488	0.275	7.43389e-09	0	mrps14
tbc1d10b	2.99649e-13	0.669736	0.46	0.254	7.57182e-09	0	tbc1d10b
phf6	3.00122e-13	0.774092	0.488	0.283	7.58377e-09	0	phf6
quo	3.01042e-13	1.30597	0.367	0.179	7.60702e-09	0	quo
znf593	3.05314e-13	0.588781	0.415	0.216	7.71497e-09	0	znf593
CABZ01088367.1	3.08431e-13	2.02692	0.104	0.017	7.79375e-09	0	CABZ01088367.1
si:ch211-133n4.4	3.09812e-13	0.219675	0.769	0.595	7.82863e-09	0	si:ch211-133n4.4
si:ch211-243j20.2	3.10933e-13	0.615613	0.39	0.208	7.85698e-09	0	si:ch211-243j20.2
nhp2	3.12087e-13	0.494538	0.805	0.642	7.88611e-09	0	nhp2
cyp2v1	3.14184e-13	0.628792	0.429	0.242	7.93912e-09	0	cyp2v1
chchd4a	3.23077e-13	0.120384	0.392	0.195	8.16382e-09	0	chchd4a
rbbp8	3.25573e-13	1.69349	0.204	0.07	8.22689e-09	0	rbbp8
fthl30	3.25919e-13	1.20867	0.349	0.169	8.23565e-09	0	fthl30
mrps27	3.32172e-13	1.02075	0.413	0.226	8.39366e-09	0	mrps27
phip	3.35063e-13	0.261445	0.617	0.406	8.4667e-09	0	phip
mars2	3.38241e-13	0.301962	0.224	0.08	8.54701e-09	0	mars2
mcmbp	3.41655e-13	1.14372	0.748	0.594	8.63328e-09	0	mcmbp
pias4a	3.45329e-13	0.518435	0.694	0.532	8.72613e-09	0	pias4a
cyb5b	3.46291e-13	0.148983	0.42	0.215	8.75043e-09	0	cyb5b
galns	3.47422e-13	0.493333	0.633	0.446	8.779e-09	0	galns
nom1	3.48383e-13	0.919008	0.356	0.178	8.80329e-09	0	nom1
col4a6	3.48508e-13	1.50056	0.32	0.154	8.80646e-09	0	col4a6
polr2gl	3.48566e-13	0.256075	0.655	0.414	8.8079e-09	0	polr2gl
suz12a	3.52234e-13	0.259774	0.732	0.589	8.9006e-09	0	suz12a
ugp2b	3.53114e-13	0.260004	0.624	0.43	8.92284e-09	0	ugp2b
tex9	3.53251e-13	3.50886	0.113	0.021	8.92631e-09	0	tex9
cpsf4	3.5657e-13	0.749926	0.347	0.167	9.01015e-09	0	cpsf4
trir	3.58536e-13	0.324452	0.728	0.518	9.05984e-09	0	trir
nif3l1	3.60307e-13	0.444169	0.435	0.237	9.1046e-09	0	nif3l1
prmt6	3.62268e-13	0.6313	0.431	0.239	9.15416e-09	0	prmt6
ufc1	3.66404e-13	0.276242	0.469	0.256	9.25866e-09	0	ufc1
drap1	3.66723e-13	0.336901	0.989	0.917	9.26673e-09	0	drap1
ech1	3.67646e-13	0.258183	0.519	0.32	9.29004e-09	0	ech1
sde2	3.68583e-13	0.440162	0.59	0.397	9.31373e-09	0	sde2
slc4a4a	3.70047e-13	0.568194	0.136	0.031	9.35071e-09	0	slc4a4a
dok2	3.77358e-13	1.94986	0.179	0.055	9.53545e-09	0	dok2
hnrnpr	3.79898e-13	0.307767	0.535	0.318	9.59963e-09	0	hnrnpr
col6a3	3.83183e-13	0.461581	0.336	0.158	9.68265e-09	0	col6a3
smc3	3.87554e-13	0.38719	0.912	0.836	9.7931e-09	0	smc3
jagn1b	3.96593e-13	0.610578	0.553	0.351	1.00215e-08	0	jagn1b
plagx	3.96894e-13	0.205849	0.73	0.536	1.00291e-08	0	plagx
rbm15	4.05535e-13	0.743426	0.488	0.3	1.02475e-08	0	rbm15
trub1	4.05591e-13	1.31413	0.254	0.1	1.02489e-08	0	trub1
zgc:110239	4.07991e-13	0.390707	0.975	0.891	1.03095e-08	0	zgc:110239
hif1an	4.10661e-13	0.453188	0.476	0.273	1.0377e-08	0	hif1an
tmco1	4.15665e-13	0.195751	0.676	0.47	1.05034e-08	0	tmco1
spry2	4.16307e-13	0.156314	0.932	0.856	1.05197e-08	0	spry2
tpst1l	4.21576e-13	0.195558	0.739	0.57	1.06528e-08	0	tpst1l
tshz2	4.22878e-13	0.274881	0.41	0.227	1.06857e-08	0	tshz2
nid1a	4.23281e-13	0.632249	0.522	0.345	1.06959e-08	0	nid1a
atg5	4.28305e-13	0.387962	0.499	0.305	1.08228e-08	0	atg5
dbf4	4.28327e-13	0.621695	0.488	0.294	1.08234e-08	0	dbf4
fance	4.28774e-13	0.290267	0.274	0.111	1.08347e-08	0	fance
col12a1a	4.34337e-13	0.749533	0.524	0.323	1.09753e-08	0	col12a1a
AK6	4.38166e-13	0.34099	0.324	0.147	1.1072e-08	0	AK6
aqp12	4.41059e-13	3.46867	0.082	0.008	1.11451e-08	0	aqp12
casp20	4.50968e-13	0.705309	0.678	0.459	1.13955e-08	0	casp20
ubr5	4.52156e-13	0.301749	0.889	0.747	1.14255e-08	0	ubr5
chtf8	4.62868e-13	1.53609	0.336	0.167	1.16962e-08	0	chtf8
nfatc2ip	4.64196e-13	0.167449	0.503	0.279	1.17298e-08	0	nfatc2ip
pdgfrl	4.65506e-13	1.69754	0.17	0.051	1.17629e-08	0	pdgfrl
rcn3	4.84088e-13	1.64793	0.515	0.365	1.22324e-08	0	rcn3
cdk11b	4.84839e-13	0.470623	0.71	0.534	1.22514e-08	0	cdk11b
zgc:162472	4.86762e-13	0.376729	0.485	0.289	1.23e-08	0	zgc:162472
frrs1b	4.87681e-13	0.171791	0.535	0.337	1.23232e-08	0	frrs1b
wrnip1	4.89367e-13	1.12034	0.283	0.122	1.23658e-08	0	wrnip1
st3gal8	4.9591e-13	0.370346	0.526	0.327	1.25311e-08	0	st3gal8
msantd1	4.97256e-13	0.852851	0.188	0.061	1.25652e-08	0	msantd1
aagab	4.98357e-13	0.206261	0.626	0.419	1.2593e-08	0	aagab
fdx2	4.99058e-13	0.296494	0.619	0.438	1.26107e-08	0	fdx2
ncbp3	5.00494e-13	0.212769	0.816	0.657	1.2647e-08	0	ncbp3
fat1a	5.01644e-13	0.425115	0.562	0.353	1.2676e-08	0	fat1a
ppm1la	5.01798e-13	0.625158	0.463	0.271	1.26799e-08	0	ppm1la
cdc16	5.15852e-13	0.509655	0.583	0.364	1.30351e-08	0	cdc16
srfbp1	5.22254e-13	0.421211	0.499	0.298	1.31968e-08	0	srfbp1
pwp2h	5.22918e-13	0.381803	0.503	0.296	1.32136e-08	0	pwp2h
farsb	5.33191e-13	0.399419	0.771	0.623	1.34732e-08	0	farsb
si:zfos-1192g2.3	5.33486e-13	0.521451	0.585	0.388	1.34807e-08	0	si:zfos-1192g2.3
SGMS1	5.36014e-13	0.743586	0.44	0.257	1.35445e-08	0	SGMS1
inip	5.39186e-13	0.700763	0.392	0.193	1.36247e-08	0	inip
ahctf1	5.40892e-13	0.953258	0.519	0.327	1.36678e-08	0	ahctf1
gfra2a	5.41069e-13	3.17785	0.159	0.044	1.36723e-08	0	gfra2a
ccndbp1	5.43571e-13	0.232416	0.642	0.465	1.37355e-08	0	ccndbp1
sardh	5.45579e-13	1.32923	0.254	0.105	1.37862e-08	0	sardh
smad9	5.46387e-13	0.528128	0.737	0.572	1.38067e-08	0	smad9
cog6	5.49186e-13	0.143763	0.512	0.296	1.38774e-08	0	cog6
dgkaa	5.57761e-13	0.35407	0.388	0.204	1.40941e-08	0	dgkaa
tmem192	5.60683e-13	0.507009	0.356	0.177	1.41679e-08	0	tmem192
emd	5.62533e-13	0.414816	0.739	0.521	1.42146e-08	0	emd
pigs	5.662e-13	0.164471	0.873	0.7	1.43073e-08	0	pigs
tonsl	5.7039e-13	2.22302	0.297	0.135	1.44132e-08	0	tonsl
ccdc127b	5.742e-13	1.11902	0.238	0.09	1.45095e-08	0	ccdc127b
MZT1	5.78065e-13	0.544124	0.508	0.294	1.46071e-08	0	MZT1
pmaip1	5.78523e-13	0.33113	0.338	0.156	1.46187e-08	0	pmaip1
cbx1a	5.79104e-13	0.707746	0.871	0.756	1.46334e-08	0	cbx1a
prkra	5.86402e-13	1.27997	0.42	0.237	1.48178e-08	0	prkra
wdr74	5.87585e-13	0.365783	0.458	0.261	1.48477e-08	0	wdr74
rdh12	5.8854e-13	0.331763	0.166	0.047	1.48718e-08	0	rdh12
ccz1	5.99916e-13	0.372494	0.769	0.598	1.51593e-08	0	ccz1
cmss1	6.07899e-13	0.60712	0.32	0.151	1.5361e-08	0	cmss1
mrpl51	6.0924e-13	0.259059	0.542	0.337	1.53949e-08	0	mrpl51
elavl1a	6.24892e-13	0.12496	0.703	0.49	1.57904e-08	0	elavl1a
tnn	6.27495e-13	2.6185	0.501	0.323	1.58562e-08	0	tnn
tent5ab	6.34409e-13	0.512176	0.692	0.516	1.60309e-08	0	tent5ab
abraxas2	6.39252e-13	0.496593	0.342	0.163	1.61532e-08	0	abraxas2
nfyal	6.39486e-13	1.17996	0.283	0.122	1.61592e-08	0	nfyal
mocs3	6.74954e-13	1.14826	0.24	0.094	1.70554e-08	0	mocs3
hoxc9a	6.80739e-13	0.685806	0.327	0.156	1.72016e-08	0	hoxc9a
pgls	6.82347e-13	0.301082	0.501	0.297	1.72422e-08	0	pgls
cox10	6.86665e-13	0.20562	0.794	0.635	1.73513e-08	0	cox10
aldh2.2	6.87042e-13	0.332569	0.794	0.605	1.73609e-08	0	aldh2.2
urb2	6.9653e-13	0.887485	0.435	0.246	1.76006e-08	0	urb2
hspa5	7.05386e-13	0.337688	0.991	0.974	1.78244e-08	0	hspa5
mrps17	7.09729e-13	0.623433	0.272	0.112	1.79341e-08	0	mrps17
cyp20a1	7.16443e-13	0.263037	0.839	0.738	1.81038e-08	0	cyp20a1
ddx55	7.18028e-13	0.203415	0.385	0.205	1.81438e-08	0	ddx55
tfap2a	7.18047e-13	0.859618	0.426	0.246	1.81443e-08	0	tfap2a
slc9a6a	7.31051e-13	0.291422	0.535	0.321	1.84729e-08	0	slc9a6a
phb	7.37528e-13	0.319885	0.825	0.686	1.86366e-08	0	phb
dmap1	7.48797e-13	0.387886	0.717	0.535	1.89214e-08	0	dmap1
si:ch211-288g17.3	7.52304e-13	0.274701	0.995	0.988	1.901e-08	0	si:ch211-288g17.3
churc1	7.58998e-13	0.32988	0.415	0.219	1.91791e-08	0	churc1
jmjd7	7.60244e-13	0.502399	0.15	0.039	1.92106e-08	0	jmjd7
cpsf3	7.61504e-13	0.316191	0.844	0.729	1.92424e-08	0	cpsf3
arl4aa	7.67117e-13	0.358833	0.737	0.541	1.93843e-08	0	arl4aa
sntb1	7.67305e-13	0.195465	0.317	0.149	1.9389e-08	0	sntb1
coasy	7.68105e-13	0.45713	0.481	0.292	1.94092e-08	0	coasy
hmga1a	7.82341e-13	0.301297	1	1	1.9769e-08	0	hmga1a
si:dkey-266m15.6	7.83271e-13	0.341199	0.624	0.43	1.97925e-08	0	si:dkey-266m15.6
ift74	7.97208e-13	0.155751	0.757	0.584	2.01447e-08	0	ift74
gclm	8.0109e-13	0.205119	0.639	0.444	2.02427e-08	0	gclm
zgc:194224	8.19272e-13	0.285555	0.206	0.07	2.07022e-08	0	zgc:194224
alg6	8.20879e-13	0.74213	0.517	0.328	2.07428e-08	0	alg6
sh3bgrl	8.23758e-13	0.341205	0.488	0.293	2.08155e-08	0	sh3bgrl
cers5	8.32762e-13	0.111106	0.832	0.681	2.10431e-08	0	cers5
yaf2	8.39959e-13	0.214576	0.463	0.263	2.12249e-08	0	yaf2
acadvl	8.46404e-13	0.152904	0.914	0.858	2.13878e-08	0	acadvl
mrpl9	8.49387e-13	0.531066	0.295	0.129	2.14632e-08	0	mrpl9
yju2	8.53119e-13	0.240334	0.751	0.592	2.15575e-08	0	yju2
si:ch73-147o17.1	8.59609e-13	0.306755	0.474	0.262	2.17215e-08	0	si:ch73-147o17.1
prodha	8.67914e-13	0.678398	0.56	0.371	2.19313e-08	0	prodha
MSANTD2	8.71497e-13	2.5105	0.122	0.026	2.20219e-08	0	MSANTD2
cratb	8.71535e-13	0.396721	0.508	0.325	2.20228e-08	0	cratb
tcta	8.7715e-13	0.229086	0.522	0.294	2.21647e-08	0	tcta
ipo7	8.84336e-13	0.361608	0.982	0.956	2.23463e-08	0	ipo7
lxn	8.9248e-13	0.222195	0.465	0.277	2.25521e-08	0	lxn
med4	9.01392e-13	0.30792	0.454	0.242	2.27773e-08	0	med4
tomm34	9.09121e-13	0.798471	0.633	0.418	2.29726e-08	0	tomm34
fbxo38	9.19504e-13	0.184148	0.383	0.197	2.32349e-08	0	fbxo38
fancc	9.22155e-13	1.29436	0.252	0.101	2.33019e-08	0	fancc
eif4bb	9.38081e-13	0.321545	0.975	0.952	2.37044e-08	0	eif4bb
hccsa.1	9.54059e-13	0.669178	0.336	0.156	2.41081e-08	0	hccsa.1
pef1	9.58103e-13	0.242117	0.746	0.54	2.42103e-08	0	pef1
tmem106a	9.65693e-13	0.277572	0.596	0.388	2.44021e-08	0	tmem106a
zgc:77287	9.65946e-13	1.01606	0.379	0.196	2.44085e-08	0	zgc:77287
mapkapk2a	9.71283e-13	0.159398	0.891	0.791	2.45434e-08	0	mapkapk2a
ptar1	9.73021e-13	0.796385	0.308	0.143	2.45873e-08	0	ptar1
zgc:110591	9.80566e-13	0.212274	0.927	0.832	2.47779e-08	0	zgc:110591
casp7	9.83097e-13	0.925301	0.308	0.149	2.48419e-08	0	casp7
plcg2	9.85787e-13	0.478352	0.288	0.128	2.49099e-08	0	plcg2
chsy1	9.93079e-13	0.538537	0.601	0.431	2.50941e-08	0	chsy1
prr12a	1.00405e-12	0.468698	0.839	0.682	2.53713e-08	0	prr12a
anapc4	1.00925e-12	0.80087	0.535	0.331	2.55027e-08	0	anapc4
cars1	1.01412e-12	0.205696	0.683	0.497	2.56259e-08	0	cars1
rcc2	1.01963e-12	0.293317	0.93	0.84	2.5765e-08	0	rcc2
ctcf	1.03475e-12	0.51596	0.862	0.712	2.61472e-08	0	ctcf
rangrf	1.03751e-12	1.04592	0.238	0.092	2.62169e-08	0	rangrf
gnai2b	1.05086e-12	0.566352	0.46	0.287	2.65542e-08	0	gnai2b
si:dkey-287g12.6	1.05332e-12	0.612403	0.127	0.028	2.66164e-08	0	si:dkey-287g12.6
ciapin1	1.05838e-12	0.220634	0.776	0.638	2.67442e-08	0	ciapin1
ppp4ca	1.07785e-12	0.255333	0.762	0.548	2.72363e-08	0	ppp4ca
aga	1.08779e-12	0.504327	0.533	0.329	2.74873e-08	0	aga
si:dkeyp-27c8.2	1.093e-12	1.78495	0.166	0.048	2.76191e-08	0	si:dkeyp-27c8.2
si:dkey-219c3.2	1.09403e-12	0.686422	0.537	0.33	2.76452e-08	0	si:dkey-219c3.2
eif1axa	1.09725e-12	0.638344	0.803	0.633	2.77264e-08	0	eif1axa
si:ch211-266i6.3	1.10868e-12	0.452762	0.556	0.341	2.80152e-08	0	si:ch211-266i6.3
znf831	1.11173e-12	1.40717	0.122	0.026	2.80924e-08	0	znf831
uprt	1.13395e-12	0.420401	0.535	0.327	2.86539e-08	0	uprt
ptrh1	1.13671e-12	0.763185	0.2	0.07	2.87234e-08	0	ptrh1
ptges3a	1.13856e-12	0.289832	0.776	0.604	2.87703e-08	0	ptges3a
poc1a	1.13986e-12	1.3451	0.245	0.098	2.88032e-08	0	poc1a
cbx1b	1.15545e-12	0.112098	0.32	0.145	2.9197e-08	0	cbx1b
vwa1	1.16789e-12	0.431691	0.941	0.834	2.95114e-08	0	vwa1
eif3jb	1.18997e-12	0.387614	0.583	0.375	3.00695e-08	0	eif3jb
mak16	1.20076e-12	0.609624	0.603	0.414	3.0342e-08	0	mak16
si:ch73-127m5.2	1.22658e-12	0.152839	0.449	0.254	3.09943e-08	0	si:ch73-127m5.2
csf1rb	1.22985e-12	1.26998	0.329	0.168	3.10771e-08	0	csf1rb
b3galnt2	1.23386e-12	1.07464	0.363	0.184	3.11783e-08	0	b3galnt2
plekho2	1.25145e-12	0.37739	0.383	0.2	3.16229e-08	0	plekho2
si:ch211-11k18.4	1.25423e-12	0.340373	0.882	0.767	3.16932e-08	0	si:ch211-11k18.4
hoxa10b	1.26722e-12	0.678411	0.265	0.112	3.20215e-08	0	hoxa10b
si:dkey-69o16.5	1.26749e-12	0.625306	0.234	0.089	3.20282e-08	0	si:dkey-69o16.5
l3mbtl2	1.27076e-12	0.410418	0.458	0.261	3.2111e-08	0	l3mbtl2
glud1b	1.27992e-12	0.24851	0.907	0.862	3.23423e-08	0	glud1b
trib3	1.29295e-12	0.135167	0.927	0.835	3.26715e-08	0	trib3
spsb4b	1.30014e-12	0.522612	0.365	0.189	3.28534e-08	0	spsb4b
sec23b	1.30548e-12	0.18425	0.839	0.694	3.29881e-08	0	sec23b
cx23	1.30781e-12	7.65118	0.054	0	3.30471e-08	0	cx23
zgc:56699	1.31225e-12	0.45563	0.363	0.184	3.31593e-08	0	zgc:56699
sub1b	1.33339e-12	0.486431	0.556	0.358	3.36935e-08	0	sub1b
meis3	1.36209e-12	1.46703	0.295	0.136	3.44186e-08	0	meis3
ap3s2	1.36693e-12	0.113844	0.56	0.329	3.4541e-08	0	ap3s2
six1b	1.37902e-12	2.07449	0.159	0.045	3.48465e-08	0	six1b
slc25a34	1.3818e-12	0.29038	0.263	0.108	3.49168e-08	0	slc25a34
stn1	1.40275e-12	0.443033	0.274	0.116	3.5446e-08	0	stn1
si:zfos-943e10.1	1.41498e-12	0.261213	0.44	0.252	3.57552e-08	0	si:zfos-943e10.1
mgat2	1.4317e-12	0.118042	0.737	0.529	3.61777e-08	0	mgat2
naa10	1.4515e-12	0.22325	0.789	0.646	3.66779e-08	0	naa10
papolg	1.45712e-12	0.310976	0.841	0.682	3.68199e-08	0	papolg
CT025742.1	1.45785e-12	1.39104	0.469	0.288	3.68384e-08	0	CT025742.1
eef2a.1	1.46144e-12	0.536114	0.429	0.24	3.69292e-08	0	eef2a.1
arpin	1.48021e-12	1.08024	0.295	0.129	3.74035e-08	0	arpin
b3galt2	1.48116e-12	0.281253	0.574	0.371	3.74274e-08	0	b3galt2
hephl1a	1.49062e-12	1.21925	0.136	0.033	3.76665e-08	0	hephl1a
si:ch211-266k8.4	1.49691e-12	0.8641	0.195	0.065	3.78254e-08	0	si:ch211-266k8.4
ucp3	1.49722e-12	2.4248	0.129	0.03	3.78332e-08	0	ucp3
ubxn1	1.50251e-12	0.435891	0.796	0.614	3.7967e-08	0	ubxn1
ireb2	1.50685e-12	0.127021	0.59	0.402	3.80767e-08	0	ireb2
tubb1	1.51258e-12	1.47601	0.209	0.076	3.82213e-08	0	tubb1
ash2l	1.54233e-12	0.386621	0.805	0.652	3.8973e-08	0	ash2l
sec13	1.5436e-12	0.490243	0.828	0.692	3.90052e-08	0	sec13
si:dkey-202e22.2	1.55351e-12	2.13905	0.197	0.069	3.92557e-08	0	si:dkey-202e22.2
mettl3	1.58198e-12	0.612828	0.626	0.431	3.9975e-08	0	mettl3
zfand1	1.58318e-12	0.446652	0.306	0.141	4.00053e-08	0	zfand1
ggh	1.60906e-12	0.239057	0.551	0.328	4.06592e-08	0	ggh
FO704750.1	1.60936e-12	0.250027	0.283	0.122	4.06668e-08	0	FO704750.1
eef2kmt	1.64164e-12	0.712212	0.17	0.051	4.14827e-08	0	eef2kmt
STEEP1	1.64866e-12	0.127638	0.544	0.33	4.16601e-08	0	STEEP1
rmnd5b	1.66626e-12	0.527829	0.696	0.512	4.21046e-08	0	rmnd5b
psmd4b	1.66715e-12	0.287791	0.893	0.772	4.21271e-08	0	psmd4b
tma16	1.68972e-12	0.742862	0.283	0.123	4.26975e-08	0	tma16
emilin1b	1.76487e-12	0.396761	0.841	0.732	4.45965e-08	0	emilin1b
slc25a25a	1.76649e-12	0.126181	0.567	0.353	4.46375e-08	0	slc25a25a
arl2	1.78323e-12	0.421534	0.463	0.255	4.50604e-08	0	arl2
pfdn2	1.79132e-12	0.437752	0.662	0.461	4.52648e-08	0	pfdn2
trim25	1.80147e-12	0.590903	0.209	0.075	4.55214e-08	0	trim25
lman2la	1.80732e-12	0.638803	0.451	0.26	4.56691e-08	0	lman2la
pgap2	1.80815e-12	0.26712	0.528	0.328	4.56901e-08	0	pgap2
czib	1.81768e-12	0.222887	0.494	0.272	4.59311e-08	0	czib
ivns1abpa	1.83962e-12	1.1426	0.209	0.075	4.64854e-08	0	ivns1abpa
kyat3	1.84273e-12	0.44448	0.454	0.261	4.6564e-08	0	kyat3
phospho2	1.84825e-12	1.80749	0.211	0.076	4.67035e-08	0	phospho2
lin37	1.85372e-12	0.691296	0.526	0.307	4.68417e-08	0	lin37
inpp5l	1.85429e-12	0.419713	0.549	0.352	4.68561e-08	0	inpp5l
smu1a	1.85667e-12	0.455302	0.864	0.76	4.69161e-08	0	smu1a
p2ry8	1.92937e-12	3.37808	0.098	0.015	4.87532e-08	0	p2ry8
tspan18a	1.95172e-12	0.545636	0.76	0.602	4.9318e-08	0	tspan18a
si:dkey-34m19.3	1.9881e-12	0.794792	0.295	0.135	5.02373e-08	0	si:dkey-34m19.3
kntc1	1.98901e-12	1.00716	0.501	0.325	5.02603e-08	0	kntc1
xrcc1	1.98913e-12	1.17493	0.603	0.426	5.02634e-08	0	xrcc1
znrd2	2.00696e-12	0.500399	0.558	0.362	5.07139e-08	0	znrd2
serpinb1l3	2.02675e-12	0.218046	0.728	0.535	5.12139e-08	0	serpinb1l3
xpo4	2.045e-12	0.359725	0.63	0.429	5.16751e-08	0	xpo4
mybl2b	2.04843e-12	1.94931	0.553	0.387	5.17618e-08	0	mybl2b
wdr26b	2.05259e-12	0.132304	0.834	0.666	5.18669e-08	0	wdr26b
sp1	2.09968e-12	0.699008	0.483	0.281	5.30569e-08	0	sp1
insra	2.11802e-12	0.422781	0.639	0.435	5.35203e-08	0	insra
atp5if1a	2.13726e-12	0.689059	0.78	0.606	5.40064e-08	0	atp5if1a
plpp5	2.15843e-12	0.139835	0.703	0.509	5.45413e-08	0	plpp5
psmd12	2.16681e-12	0.398322	0.975	0.927	5.4753e-08	0	psmd12
srsf7a	2.16919e-12	0.418296	0.989	0.969	5.48133e-08	0	srsf7a
chchd6b	2.17113e-12	0.63024	0.707	0.517	5.48622e-08	0	chchd6b
adam19b	2.21763e-12	0.180627	0.483	0.297	5.60373e-08	0	adam19b
mppe1	2.21848e-12	0.278972	0.324	0.151	5.60587e-08	0	mppe1
zgc:110782	2.2875e-12	0.736433	0.188	0.063	5.78028e-08	0	zgc:110782
ifrd1	2.29063e-12	0.157411	0.95	0.887	5.7882e-08	0	ifrd1
pgd	2.30499e-12	0.136176	0.948	0.897	5.82448e-08	0	pgd
pask	2.31494e-12	2.87619	0.211	0.079	5.84962e-08	0	pask
rhbdf1b	2.34045e-12	0.500605	0.544	0.36	5.91408e-08	0	rhbdf1b
gadd45bb	2.35313e-12	0.944312	0.322	0.158	5.94612e-08	0	gadd45bb
ctc1	2.35465e-12	0.12911	0.522	0.32	5.94996e-08	0	ctc1
dtwd1	2.41931e-12	0.692349	0.209	0.077	6.11336e-08	0	dtwd1
si:ch73-250a16.5	2.45476e-12	2.39316	0.127	0.03	6.20293e-08	0	si:ch73-250a16.5
map7d2b	2.45701e-12	1.17286	0.116	0.023	6.20862e-08	0	map7d2b
si:dkey-108k21.10	2.45866e-12	1.15684	0.426	0.249	6.21279e-08	0	si:dkey-108k21.10
rbm14a	2.4929e-12	0.318632	0.927	0.825	6.29931e-08	0	rbm14a
polrmt	2.49502e-12	0.682343	0.374	0.195	6.30467e-08	0	polrmt
eif4e2rs1	2.49739e-12	0.239312	0.825	0.712	6.31066e-08	0	eif4e2rs1
[truncated: 3,220 more rows]

## Sheet: DEG_5dpf
5 dpf	p_val	avg_log2FC	pct.1	pct.2	p_val_adj	cluster	gene
cdh6	5.30961e-119	1.28987	0.988	0.98	1.34169e-114	0	cdh6
si:ch211-152c2.3	2.25605e-113	1.24112	0.958	0.884	5.70081e-109	0	si:ch211-152c2.3
tbx1	7.31951e-112	1.30116	0.967	0.906	1.84957e-107	0	tbx1
cd63	9.9154e-104	0.384483	0.997	0.999	2.50552e-99	0	cd63
mrc1a	2.77706e-94	1.2866	0.97	0.933	7.01734e-90	0	mrc1a
cldn11b	4.46521e-88	1.1997	0.961	0.901	1.12831e-83	0	cldn11b
ctsla	4.78428e-85	0.478521	1	0.994	1.20894e-80	0	ctsla
hapln3	7.04896e-85	0.959831	0.985	0.963	1.7812e-80	0	hapln3
lyve1b	8.23344e-82	0.720909	0.985	0.971	2.08051e-77	0	lyve1b
marcksl1a	1.39837e-79	0.463789	0.997	0.993	3.53354e-75	0	marcksl1a
gpr183a	6.09896e-65	1.60288	0.867	0.668	1.54115e-60	0	gpr183a
ptx3a	2.30676e-64	1.24091	0.913	0.806	5.82896e-60	0	ptx3a
stab1	1.83339e-63	1.03087	0.979	0.955	4.6328e-59	0	stab1
myct1a	2.84407e-63	0.402512	0.982	0.973	7.18669e-59	0	myct1a
mafba	1.12535e-62	1.01981	0.952	0.899	2.84365e-58	0	mafba
nrp2a	2.08175e-62	1.65278	0.925	0.81	5.26036e-58	0	nrp2a
flt4	3.13254e-62	0.707059	0.994	0.994	7.91562e-58	0	flt4
dab2	1.58749e-59	1.14108	0.928	0.846	4.01142e-55	0	dab2
tm4sf18	1.85012e-54	0.596548	0.985	0.966	4.67507e-50	0	tm4sf18
si:ch211-227m13.1	1.72348e-53	2.10901	0.747	0.417	4.35506e-49	0	si:ch211-227m13.1
CU984579.1	3.09284e-52	1.68024	0.807	0.532	7.8153e-48	0	CU984579.1
stab2	6.12389e-52	1.63323	0.907	0.769	1.54745e-47	0	stab2
fn1a	4.81841e-51	1.52872	0.934	0.838	1.21756e-46	0	fn1a
loxl1	4.81489e-50	0.815493	0.997	0.984	1.21667e-45	0	loxl1
adam8a	1.3959e-48	1.53533	0.864	0.735	3.52731e-44	0	adam8a
lamp2	7.40909e-48	0.528842	0.985	0.972	1.8722e-43	0	lamp2
im:7151449	4.58006e-44	1.7236	0.732	0.454	1.15734e-39	0	im:7151449
ralgapa2	3.92103e-42	1.23796	0.904	0.728	9.90805e-38	0	ralgapa2
lgmn	5.20721e-42	0.559826	0.994	0.984	1.31581e-37	0	lgmn
letmd1	1.80773e-40	1.36409	0.681	0.353	4.56794e-36	0	letmd1
hsd3b7	1.24659e-39	0.641366	0.97	0.948	3.15001e-35	0	hsd3b7
mrc1b	1.35827e-38	1.5738	0.798	0.651	3.4322e-34	0	mrc1b
fam107b	2.32494e-38	0.658852	0.952	0.887	5.8749e-34	0	fam107b
hyal2b	4.32371e-38	1.26876	0.87	0.798	1.09256e-33	0	hyal2b
gas6	1.19013e-37	0.642829	0.997	0.987	3.00733e-33	0	gas6
arl4aa	1.26055e-37	1.3462	0.777	0.551	3.18529e-33	0	arl4aa
podn	4.19027e-37	2.64134	0.533	0.223	1.05884e-32	0	podn
atp1b1a	3.06338e-34	0.416245	1	0.978	7.74085e-30	0	atp1b1a
celsr1b	1.22389e-33	2.35837	0.657	0.406	3.09265e-29	0	celsr1b
gpr182	5.14052e-33	0.367119	1	0.994	1.29896e-28	0	gpr182
dhrs3a	1.96191e-32	1.11796	0.84	0.697	4.95754e-28	0	dhrs3a
nr5a2	1.37996e-31	0.990627	0.892	0.805	3.48701e-27	0	nr5a2
hexb	6.54489e-31	0.73292	0.91	0.847	1.65383e-26	0	hexb
peak1	8.02009e-31	0.763447	0.928	0.842	2.0266e-26	0	peak1
mgat4b	1.18836e-29	1.72721	0.717	0.49	3.00287e-25	0	mgat4b
actb1	1.76585e-29	0.144632	1	1	4.46213e-25	0	actb1
osr1	1.91346e-29	1.80682	0.623	0.379	4.83513e-25	0	osr1
snx2	1.00026e-27	1.16358	0.777	0.643	2.52755e-23	0	snx2
mafbb	1.1635e-27	0.97126	0.855	0.746	2.94004e-23	0	mafbb
emilin1b	1.54832e-27	0.519209	1	0.987	3.91246e-23	0	emilin1b
angpt2a	2.51203e-27	0.907958	0.849	0.711	6.34765e-23	0	angpt2a
aplp2	4.91714e-27	0.617491	0.976	0.945	1.24251e-22	0	aplp2
rasgef1bb	1.25712e-26	0.698514	0.91	0.881	3.17662e-22	0	rasgef1bb
iqsec2a	2.78087e-26	1.73899	0.536	0.259	7.02697e-22	0	iqsec2a
ms4a17a.11	3.42725e-26	0.549448	0.925	0.85	8.66033e-22	0	ms4a17a.11
ebf3a:1	8.32673e-26	1.33828	0.783	0.631	2.10408e-21	0	ebf3a:1
prox1a	1.98471e-25	1.49999	0.747	0.558	5.01517e-21	0	prox1a
ms4a17a.9	2.68161e-25	0.441017	0.949	0.946	6.77617e-21	0	ms4a17a.9
itga9	2.24695e-24	0.772267	0.877	0.807	5.67781e-20	0	itga9
DAB2	7.1293e-24	0.742057	0.88	0.799	1.8015e-19	0	DAB2
ctsd	1.10075e-23	0.465811	0.973	0.939	2.78149e-19	0	ctsd
tspan18b	1.2012e-23	0.357536	0.988	0.987	3.03532e-19	0	tspan18b
f2r	6.41536e-23	0.869399	0.819	0.731	1.6211e-18	0	f2r
rab11bb	7.65665e-23	0.783056	0.822	0.719	1.93476e-18	0	rab11bb
tpte	8.57626e-23	0.712957	0.895	0.807	2.16713e-18	0	tpte
SIPA1	3.73298e-22	1.59816	0.524	0.271	9.43286e-18	0	SIPA1
znf521	1.03141e-21	1.35387	0.732	0.553	2.60626e-17	0	znf521
ramp2	1.41796e-21	0.220753	0.997	1	3.58303e-17	0	ramp2
pkig	1.4693e-21	1.20107	0.657	0.416	3.71278e-17	0	pkig
smad1	2.02279e-21	0.534409	0.97	0.941	5.1114e-17	0	smad1
epha2a	2.21499e-21	0.834225	0.873	0.766	5.59706e-17	0	epha2a
tgfbi	3.00083e-21	0.361923	0.994	0.983	7.58281e-17	0	tgfbi
sept9a	3.45123e-21	0.622876	0.961	0.918	8.7209e-17	0	sept9a
si:dkey-28n18.9	8.99837e-21	1.07357	0.72	0.597	2.2738e-16	0	si:dkey-28n18.9
tuba8l3	2.12239e-20	0.403138	0.961	0.945	5.36306e-16	0	tuba8l3
cd82a	2.87938e-20	0.637573	0.928	0.888	7.27591e-16	0	cd82a
smad5	4.37966e-20	0.511132	0.952	0.887	1.1067e-15	0	smad5
myh10	1.30616e-19	0.775873	0.916	0.898	3.30054e-15	0	myh10
lima1a	1.757e-19	0.604137	0.922	0.889	4.43976e-15	0	lima1a
srgap1a	1.98092e-19	1.54802	0.563	0.35	5.00558e-15	0	srgap1a
psap	2.07818e-19	0.432416	0.991	0.982	5.25136e-15	0	psap
pcdh2g28	4.09637e-19	0.518262	0.934	0.861	1.03511e-14	0	pcdh2g28
acsbg2	5.10982e-19	0.687389	0.904	0.854	1.2912e-14	0	acsbg2
cltca	9.02993e-19	0.526877	0.952	0.951	2.28177e-14	0	cltca
tspan18a	9.28109e-19	0.799034	0.834	0.739	2.34524e-14	0	tspan18a
snx5	1.02478e-18	0.634671	0.925	0.877	2.58951e-14	0	snx5
nrp2b	1.30574e-18	0.714822	0.901	0.895	3.29948e-14	0	nrp2b
fstl1b	1.39496e-18	0.342587	0.988	0.997	3.52492e-14	0	fstl1b
coro2ba	2.25626e-18	1.14045	0.684	0.556	5.70134e-14	0	coro2ba
tnfaip2b	2.3095e-18	0.797395	0.864	0.735	5.83587e-14	0	tnfaip2b
fuca2	2.68068e-18	0.882869	0.828	0.728	6.77382e-14	0	fuca2
pde4ba	3.33007e-18	0.448847	0.994	0.976	8.41474e-14	0	pde4ba
lzts2a	5.37009e-18	0.492116	0.952	0.926	1.35697e-13	0	lzts2a
snx1a	5.65967e-18	0.424725	0.964	0.955	1.43014e-13	0	snx1a
akr1a1b	6.85651e-18	1.12896	0.639	0.461	1.73257e-13	0	akr1a1b
b3gnt7	1.36891e-17	1.57076	0.521	0.324	3.4591e-13	0	b3gnt7
metrnla	1.54341e-17	0.81215	0.828	0.79	3.90004e-13	0	metrnla
2024-09-12	1.62683e-17	0.438868	0.961	0.935	4.11084e-13	0	2024-09-12
gcnt4a	2.95347e-17	0.609782	0.864	0.823	7.46313e-13	0	gcnt4a
dut	6.76447e-17	1.07361	0.696	0.554	1.70932e-12	0	dut
nr2f2	6.94906e-17	0.909214	0.75	0.654	1.75596e-12	0	nr2f2
fthl27	1.54015e-16	0.255465	0.976	0.966	3.8918e-12	0	fthl27
si:dkey-56i24.1	1.70784e-16	3.28181	0.145	0.023	4.31554e-12	0	si:dkey-56i24.1
calua	2.08842e-16	0.535076	0.904	0.865	5.27723e-12	0	calua
s1pr1	3.32416e-16	0.606471	0.898	0.84	8.39982e-12	0	s1pr1
mc5rb	3.67729e-16	2.76051	0.208	0.057	9.29214e-12	0	mc5rb
krt18b	4.10338e-16	0.608975	0.886	0.839	1.03688e-11	0	krt18b
si:dkey-56i24.1:1	1.06259e-15	1.37582	0.536	0.355	2.68505e-11	0	si:dkey-56i24.1:1
exoc6	1.33762e-15	0.71342	0.843	0.765	3.38004e-11	0	exoc6
ctsba	1.70548e-15	0.505768	0.843	0.799	4.30959e-11	0	ctsba
snap23.1	5.42877e-15	0.485648	0.895	0.847	1.3718e-10	0	snap23.1
cftr	5.60059e-15	2.40266	0.413	0.235	1.41521e-10	0	cftr
pcdh12	1.40455e-14	0.317813	0.994	0.985	3.54916e-10	0	pcdh12
pcdh17	2.68796e-14	0.610034	0.922	0.927	6.7922e-10	0	pcdh17
fnbp1b:1	3.30382e-14	1.04505	0.551	0.356	8.34843e-10	0	fnbp1b:1
gatad1	4.35971e-14	1.74279	0.325	0.146	1.10165e-09	0	gatad1
loxl3b	4.86034e-14	0.432028	0.964	0.924	1.22816e-09	0	loxl3b
gas2l3	6.42712e-14	2.29851	0.301	0.133	1.62407e-09	0	gas2l3
napsa	7.6038e-14	1.10943	0.696	0.575	1.9214e-09	0	napsa
lrp5	8.95822e-14	1.15576	0.639	0.499	2.26365e-09	0	lrp5
lsp1b	9.30779e-14	0.395366	0.928	0.929	2.35199e-09	0	lsp1b
ctsz	1.3728e-13	0.544349	0.849	0.823	3.46893e-09	0	ctsz
srgap1b	1.62666e-13	2.69833	0.247	0.094	4.11041e-09	0	srgap1b
grap2a	1.73756e-13	2.05453	0.301	0.132	4.39065e-09	0	grap2a
zmp:0000001082	1.88909e-13	1.36795	0.584	0.403	4.77355e-09	0	zmp:0000001082
vstm4a	2.02396e-13	0.929777	0.693	0.54	5.11435e-09	0	vstm4a
zgc:110239	2.10163e-13	0.6382	0.849	0.778	5.31061e-09	0	zgc:110239
lrrn3a	2.13859e-13	2.39437	0.28	0.116	5.404e-09	0	lrrn3a
ckba	2.64702e-13	0.346196	0.949	0.945	6.68875e-09	0	ckba
lgi2a	3.09209e-13	1.87366	0.416	0.237	7.81339e-09	0	lgi2a
carhsp1	3.52316e-13	0.463204	0.84	0.824	8.90267e-09	0	carhsp1
add3a	3.5331e-13	0.376382	0.961	0.951	8.92779e-09	0	add3a
si:ch211-66e2.3	5.06115e-13	0.58417	0.837	0.784	1.2789e-08	0	si:ch211-66e2.3
tmem59l	5.18735e-13	1.88218	0.455	0.282	1.31079e-08	0	tmem59l
lrrc32	5.39487e-13	1.12074	0.575	0.393	1.36323e-08	0	lrrc32
slc17a5	5.67714e-13	1.23456	0.545	0.376	1.43456e-08	0	slc17a5
rnf220a	5.83107e-13	1.68477	0.262	0.103	1.47345e-08	0	rnf220a
hoxd9a	5.97647e-13	1.35912	0.527	0.373	1.51019e-08	0	hoxd9a
cxcl12a	7.07343e-13	0.800515	0.756	0.746	1.78738e-08	0	cxcl12a
npc2	9.32328e-13	0.446274	0.834	0.775	2.3559e-08	0	npc2
itga4	1.16824e-12	0.767141	0.783	0.68	2.95202e-08	0	itga4
man1a1	1.2065e-12	0.860399	0.729	0.615	3.04871e-08	0	man1a1
mmp14b	1.23848e-12	0.500724	0.94	0.913	3.12953e-08	0	mmp14b
fscn1a	1.5938e-12	0.362206	0.982	0.968	4.02738e-08	0	fscn1a
myo1cb	1.98068e-12	0.482471	0.901	0.89	5.00499e-08	0	myo1cb
elk3	2.1797e-12	0.206177	1	1	5.50788e-08	0	elk3
ptger1a	2.50598e-12	2.12736	0.358	0.197	6.33237e-08	0	ptger1a
stag3	3.13541e-12	2.1029	0.307	0.146	7.92287e-08	0	stag3
si:dkey-192g7.3	3.56016e-12	0.623172	0.792	0.692	8.99618e-08	0	si:dkey-192g7.3
rps12	3.70602e-12	0.139749	1	0.987	9.36474e-08	0	rps12
tspan14	4.29806e-12	0.278642	0.955	0.935	1.08608e-07	0	tspan14
plat	6.09369e-12	1.63968	0.383	0.21	1.53982e-07	0	plat
cebpb	6.38127e-12	0.671344	0.81	0.699	1.61248e-07	0	cebpb
arrb2b	6.45138e-12	0.396994	0.943	0.943	1.6302e-07	0	arrb2b
etv2	8.22277e-12	0.247812	0.988	0.982	2.07781e-07	0	etv2
egfl6	1.4941e-11	2.42785	0.232	0.094	3.77543e-07	0	egfl6
timp2b	1.52527e-11	1.10798	0.554	0.394	3.85421e-07	0	timp2b
c1qtnf6a	1.54851e-11	1.38934	0.392	0.225	3.91294e-07	0	c1qtnf6a
vegfab	1.84645e-11	1.6893	0.446	0.301	4.66579e-07	0	vegfab
lgals9l1	2.073e-11	1.44341	0.307	0.149	5.23827e-07	0	lgals9l1
ms4a17a.8	2.22152e-11	1.349	0.271	0.117	5.61355e-07	0	ms4a17a.8
selenop	2.31218e-11	0.219105	0.991	0.995	5.84265e-07	0	selenop
sc:d0202	2.75498e-11	1.57128	0.229	0.089	6.96155e-07	0	sc:d0202
adora2b	3.08414e-11	1.10293	0.584	0.447	7.79332e-07	0	adora2b
agap3	3.35337e-11	2.29815	0.253	0.112	8.47364e-07	0	agap3
calm2a	3.92465e-11	0.275963	0.979	0.95	9.9172e-07	0	calm2a
pear1	5.08992e-11	0.796025	0.777	0.705	1.28617e-06	0	pear1
CR847906.1	5.81e-11	1.17071	0.349	0.18	1.46813e-06	0	CR847906.1
ndrg1a	7.39711e-11	0.867963	0.66	0.551	1.86918e-06	0	ndrg1a
zgc:194839	8.82263e-11	1.91983	0.145	0.039	2.22939e-06	0	zgc:194839
kif21a	8.89463e-11	1.92996	0.229	0.095	2.24758e-06	0	kif21a
dixdc1b	8.91411e-11	1.48624	0.458	0.295	2.25251e-06	0	dixdc1b
dip2ca	9.40231e-11	1.1913	0.584	0.462	2.37587e-06	0	dip2ca
ctsh	1.11125e-10	1.0721	0.551	0.42	2.80801e-06	0	ctsh
mtss1lb	1.17338e-10	0.782914	0.735	0.667	2.96501e-06	0	mtss1lb
adam15	1.38715e-10	0.710379	0.807	0.713	3.50519e-06	0	adam15
sh3bp5a	1.53037e-10	0.989734	0.696	0.595	3.8671e-06	0	sh3bp5a
akap12a	1.56889e-10	2.55611	0.392	0.253	3.96443e-06	0	akap12a
acta1a	1.6791e-10	0.580019	0.687	0.558	4.24292e-06	0	acta1a
flrt1b	1.81888e-10	2.83232	0.184	0.066	4.59613e-06	0	flrt1b
dse	1.96012e-10	1.3473	0.482	0.314	4.95303e-06	0	dse
sh3bp2	2.13096e-10	0.850353	0.533	0.37	5.38472e-06	0	sh3bp2
pfn2	2.34063e-10	0.240184	0.964	0.973	5.91453e-06	0	pfn2
dusp5	2.57225e-10	0.263576	0.982	0.965	6.49983e-06	0	dusp5
kif21b	2.58251e-10	1.12094	0.25	0.105	6.52574e-06	0	kif21b
si:dkey-52l18.4	3.08901e-10	0.525436	0.789	0.732	7.80563e-06	0	si:dkey-52l18.4
rimkla	3.1259e-10	0.77705	0.75	0.625	7.89883e-06	0	rimkla
mtmr8	3.31901e-10	0.801577	0.747	0.653	8.38681e-06	0	mtmr8
meis2a:1	3.45501e-10	0.604327	0.792	0.711	8.73045e-06	0	meis2a:1
CU459056.1	3.96875e-10	0.944123	0.729	0.659	1.00286e-05	0	CU459056.1
si:dkeyp-27c8.2	4.08209e-10	2.61951	0.13	0.035	1.0315e-05	0	si:dkeyp-27c8.2
actc1b	5.21962e-10	0.446802	0.822	0.739	1.31894e-05	0	actc1b
coro1a	5.33341e-10	1.39071	0.367	0.208	1.3477e-05	0	coro1a
cnn3b	5.3662e-10	1.26737	0.506	0.372	1.35599e-05	0	cnn3b
pcbp3	5.45719e-10	2.28276	0.142	0.042	1.37898e-05	0	pcbp3
sox9b	5.65162e-10	1.37842	0.41	0.252	1.42811e-05	0	sox9b
arrdc2	5.97433e-10	0.613	0.813	0.802	1.50965e-05	0	arrdc2
mgat1b	6.20199e-10	0.716451	0.762	0.66	1.56718e-05	0	mgat1b
acta1b	6.92026e-10	0.848051	0.497	0.329	1.74868e-05	0	acta1b
ralba	6.9916e-10	0.735888	0.654	0.531	1.76671e-05	0	ralba
gtf2h5	6.99375e-10	1.05756	0.428	0.277	1.76725e-05	0	gtf2h5
glipr2l	7.14019e-10	2.33766	0.142	0.042	1.80426e-05	0	glipr2l
palm3	9.21081e-10	1.03278	0.605	0.504	2.32748e-05	0	palm3
pip5k1cb	9.75418e-10	2.72187	0.142	0.043	2.46478e-05	0	pip5k1cb
ngfa	1.03282e-09	3.81739	0.078	0.012	2.60983e-05	0	ngfa
zgc:91890	1.03896e-09	1.47407	0.289	0.142	2.62535e-05	0	zgc:91890
cst14a.2	1.0409e-09	0.645052	0.599	0.469	2.63026e-05	0	cst14a.2
gstk2	1.10391e-09	2.42506	0.09	0.016	2.78947e-05	0	gstk2
sash1a	1.11305e-09	0.343774	0.961	0.942	2.81257e-05	0	sash1a
cap1	1.12815e-09	0.578128	0.732	0.628	2.85071e-05	0	cap1
cst14b.1	1.19075e-09	1.09449	0.364	0.215	3.0089e-05	0	cst14b.1
2024-09-02	1.53914e-09	0.188465	0.985	0.997	3.88924e-05	0	2024-09-02
nid1b	1.60353e-09	0.405259	0.937	0.914	4.05197e-05	0	nid1b
marcksl1b	1.69709e-09	0.156634	1	1	4.28837e-05	0	marcksl1b
lgals9l3	2.29735e-09	0.912617	0.572	0.446	5.80518e-05	0	lgals9l3
macf1a	2.32557e-09	0.480295	0.91	0.866	5.87648e-05	0	macf1a
slc22a16	2.94618e-09	1.46894	0.407	0.265	7.4447e-05	0	slc22a16
bloc1s6	2.96981e-09	0.83773	0.578	0.462	7.50442e-05	0	bloc1s6
CU896691.3	3.60542e-09	2.32228	0.16	0.058	9.11054e-05	0	CU896691.3
CABZ01115881.1	4.05173e-09	1.716	0.367	0.227	0.000102383	0	CABZ01115881.1
adgrl3.1	4.3087e-09	0.848819	0.69	0.623	0.000108876	0	adgrl3.1
antxr2a	4.58347e-09	0.707744	0.738	0.651	0.00011582	0	antxr2a
iqgap2	6.36342e-09	0.498641	0.892	0.803	0.000160797	0	iqgap2
RALGDS	6.80735e-09	0.838273	0.47	0.309	0.000172015	0	RALGDS
si:dkey-30e9.7	8.30023e-09	1.14326	0.304	0.153	0.000209739	0	si:dkey-30e9.7
nkd3	8.67389e-09	1.79926	0.232	0.11	0.00021918	0	nkd3
cdc42	9.74338e-09	0.154147	0.994	0.994	0.000246205	0	cdc42
ecscr	1.17824e-08	0.348701	0.886	0.837	0.00029773	0	ecscr
SH3TC1	1.39066e-08	0.981152	0.575	0.446	0.000351405	0	SH3TC1
2024-03-08	1.47401e-08	1.27526	0.373	0.238	0.000372468	0	2024-03-08
lnx2a	1.58356e-08	2.94034	0.133	0.043	0.000400151	0	lnx2a
ms4a17a.1	1.72667e-08	1.3321	0.145	0.047	0.000436313	0	ms4a17a.1
ACTC1	1.93318e-08	0.817534	0.434	0.271	0.000488495	0	ACTC1
fam43a	2.10791e-08	0.294235	0.97	0.956	0.000532647	0	fam43a
il13ra1	2.19423e-08	0.414536	0.873	0.808	0.00055446	0	il13ra1
ms4a17a.6	2.30036e-08	1.75252	0.139	0.046	0.000581279	0	ms4a17a.6
si:zfos-2326c3.2	3.55745e-08	0.671725	0.765	0.708	0.000898932	0	si:zfos-2326c3.2
rab5c	3.61438e-08	0.229126	0.928	0.949	0.000913318	0	rab5c
pdgfd	3.66208e-08	0.52509	0.87	0.818	0.00092537	0	pdgfd
tgfbr2b	3.81798e-08	0.172162	0.994	0.999	0.000964765	0	tgfbr2b
btg2	3.94922e-08	0.347958	0.934	0.912	0.000997929	0	btg2
ttn.1	4.06645e-08	1.15212	0.328	0.187	0.00102755	0	ttn.1
EPHB3	4.33734e-08	1.38344	0.304	0.173	0.001096	0	EPHB3
crip2l	4.68817e-08	2.01005	0.157	0.06	0.00118465	0	crip2l
rps6ka3b	4.82293e-08	0.812433	0.605	0.496	0.00121871	0	rps6ka3b
si:ch211-196f19.1	5.17195e-08	1.17335	0.196	0.083	0.0013069	0	si:ch211-196f19.1
rpz5	5.17454e-08	0.597253	0.744	0.695	0.00130755	0	rpz5
CABZ01079663.1	5.44958e-08	1.74172	0.343	0.223	0.00137706	0	CABZ01079663.1
ebf3a	5.98046e-08	0.558082	0.75	0.674	0.0015112	0	ebf3a
CABZ01066694.1	6.92746e-08	1.58649	0.226	0.11	0.0017505	0	CABZ01066694.1
gpr1	6.94229e-08	1.27026	0.358	0.228	0.00175425	0	gpr1
degs1	7.0206e-08	0.235366	0.955	0.962	0.00177403	0	degs1
sp6	7.02523e-08	3.07221	0.09	0.022	0.0017752	0	sp6
naga	7.63812e-08	0.802216	0.669	0.597	0.00193008	0	naga
fthl31	8.04673e-08	0.358704	0.729	0.628	0.00203333	0	fthl31
pald1a	8.12531e-08	0.240477	0.997	0.992	0.00205318	0	pald1a
CABZ01068209.1	8.65143e-08	2.07875	0.09	0.022	0.00218613	0	CABZ01068209.1
tubb4b	8.94005e-08	0.107709	1	1	0.00225906	0	tubb4b
eno2	1.05807e-07	2.35948	0.16	0.066	0.00267364	0	eno2
cdh10a	1.06035e-07	2.23545	0.169	0.069	0.00267939	0	cdh10a
sema4c	1.06441e-07	0.477507	0.819	0.782	0.00268966	0	sema4c
hoxb7a	1.07106e-07	1.36028	0.25	0.129	0.00270646	0	hoxb7a
fkbp1ab	1.12457e-07	0.768983	0.479	0.351	0.00284166	0	fkbp1ab
caska	1.27807e-07	0.85318	0.485	0.353	0.00322957	0	caska
f3b	1.55018e-07	1.15204	0.383	0.252	0.00391715	0	f3b
clic2	1.5872e-07	0.240555	0.955	0.936	0.0040107	0	clic2
si:ch211-258f1.3	1.6122e-07	1.23644	0.211	0.099	0.00407387	0	si:ch211-258f1.3
egfl7	1.63829e-07	0.122822	1	0.999	0.00413979	0	egfl7
magi3b	1.65785e-07	1.66058	0.102	0.029	0.00418923	0	magi3b
pdgfab	1.8096e-07	1.16546	0.431	0.312	0.00457267	0	pdgfab
calcrlb	1.82997e-07	0.348802	0.837	0.8	0.00462414	0	calcrlb
ap2m1a	1.8868e-07	0.189714	0.994	0.984	0.00476774	0	ap2m1a
CR974456.1	1.8927e-07	1.09993	0.364	0.239	0.00478265	0	CR974456.1
slc12a7b	2.14239e-07	0.443887	0.892	0.858	0.0054136	0	slc12a7b
vcanb	2.33964e-07	0.393681	0.59	0.418	0.00591204	0	vcanb
hoxb9a	2.46662e-07	1.72231	0.166	0.069	0.0062329	0	hoxb9a
snrkb	2.54757e-07	0.359536	0.898	0.882	0.00643746	0	snrkb
tiam1b	2.82838e-07	0.965688	0.434	0.287	0.00714704	0	tiam1b
raph1b	2.83614e-07	0.694892	0.69	0.613	0.00716664	0	raph1b
rin3	2.96867e-07	0.549896	0.807	0.783	0.00750153	0	rin3
clta	3.38598e-07	0.301934	0.889	0.871	0.00855604	0	clta
si:dkeyp-35e5.5	3.62912e-07	1.00853	0.265	0.142	0.00917043	0	si:dkeyp-35e5.5
fgd1	3.65066e-07	1.66123	0.093	0.025	0.00922486	0	fgd1
gpx4b	4.13127e-07	0.340053	0.804	0.765	0.0104393	0	gpx4b
si:dkeyp-33c10.7	4.18722e-07	1.02245	0.268	0.147	0.0105807	0	si:dkeyp-33c10.7
chd3	4.41924e-07	1.2827	0.208	0.101	0.011167	0	chd3
clasp1a	4.67026e-07	0.694791	0.738	0.703	0.0118013	0	clasp1a
si:ch211-204c21.1	4.94402e-07	2.4116	0.087	0.023	0.0124931	0	si:ch211-204c21.1
psmb8a	5.00859e-07	3.40617	0.045	0.005	0.0126562	0	psmb8a
glud1a	5.47203e-07	0.382943	0.88	0.847	0.0138273	0	glud1a
si:ch211-223g7.6:1	5.60458e-07	1.35357	0.226	0.118	0.0141622	0	si:ch211-223g7.6:1
si:dkey-22a18.2	5.81273e-07	0.91564	0.319	0.19	0.0146882	0	si:dkey-22a18.2
lratd2	6.37606e-07	2.15132	0.051	0.007	0.0161117	0	lratd2
ntsr1	6.48654e-07	2.68155	0.072	0.016	0.0163908	0	ntsr1
fech	7.89297e-07	1.48909	0.133	0.05	0.0199447	0	fech
cd276	8.78987e-07	0.475273	0.807	0.783	0.0222111	0	cd276
zgc:110591	9.43376e-07	0.55899	0.759	0.701	0.0238382	0	zgc:110591
TXN	9.58527e-07	0.12812	0.931	0.936	0.024221	0	TXN
man2a1	1.0194e-06	0.765916	0.63	0.564	0.0257593	0	man2a1
magi1b	1.01946e-06	0.593262	0.681	0.608	0.0257607	0	magi1b
CABZ01068208.1	1.02251e-06	1.96543	0.099	0.031	0.0258377	0	CABZ01068208.1
agfg1a	1.04753e-06	0.64913	0.62	0.545	0.0264701	0	agfg1a
reep3a	1.07114e-06	0.711292	0.675	0.646	0.0270667	0	reep3a
lamb1b	1.11574e-06	0.509301	0.858	0.842	0.0281937	0	lamb1b
si:ch211-196f19.1:1	1.17254e-06	0.855946	0.271	0.148	0.0296289	0	si:ch211-196f19.1:1
cotl1	1.19204e-06	0.399842	0.834	0.801	0.0301215	0	cotl1
BX572619.1	1.24118e-06	0.839922	0.63	0.529	0.0313633	0	BX572619.1
fgd5a	1.27125e-06	0.237737	0.997	0.99	0.0321233	0	fgd5a
snrpb	1.29521e-06	0.355889	0.816	0.778	0.0327286	0	snrpb
tspan9a	1.38138e-06	1.30032	0.229	0.125	0.0349061	0	tspan9a
nkd3:3	1.4434e-06	4.03062	0.039	0.003	0.0364732	0	nkd3:3
phldb1a	1.56169e-06	1.33536	0.313	0.199	0.0394623	0	phldb1a
gtf2ird1	1.5625e-06	0.983748	0.494	0.373	0.0394827	0	gtf2ird1
syt16	1.66658e-06	2.147	0.139	0.059	0.0421128	0	syt16
si:ch211-173m16.2	1.70169e-06	1.90449	0.12	0.046	0.0430001	0	si:ch211-173m16.2
selenow1	1.77599e-06	0.214412	0.852	0.83	0.0448775	0	selenow1
h2ax1	1.84076e-06	0.188901	0.946	0.926	0.0465142	0	h2ax1
tcp1	2.02933e-06	0.263577	0.946	0.921	0.0512791	0	tcp1
snx8a	2.15232e-06	1.17752	0.443	0.333	0.0543869	0	snx8a
hoxb8a	2.28206e-06	1.19298	0.277	0.164	0.0576653	0	hoxb8a
abca1a	2.28855e-06	0.297259	0.949	0.936	0.0578293	0	abca1a
bcl2l16	2.4008e-06	0.702703	0.509	0.399	0.0606657	0	bcl2l16
tuba8l4	2.57278e-06	0.162346	0.991	0.976	0.0650115	0	tuba8l4
galca	2.95428e-06	0.987221	0.208	0.103	0.0746516	0	galca
gdpd5b	3.06422e-06	1.14147	0.398	0.296	0.0774298	0	gdpd5b
nedd4a	3.18555e-06	1.04411	0.377	0.258	0.0804957	0	nedd4a
daam1b	3.31563e-06	0.675502	0.307	0.182	0.0837828	0	daam1b
zmp:0000000527	3.31646e-06	1.70764	0.105	0.037	0.0838037	0	zmp:0000000527
galnt1	3.3363e-06	0.396248	0.88	0.837	0.084305	0	galnt1
ddx5	3.36684e-06	0.1257	0.994	0.998	0.0850767	0	ddx5
chadla	3.37623e-06	1.94964	0.226	0.128	0.0853141	0	chadla
rasa4	3.53126e-06	1.93473	0.217	0.12	0.0892313	0	rasa4
rapgef4	3.63075e-06	1.93115	0.133	0.055	0.0917455	0	rapgef4
zgc:100829	3.68464e-06	0.354748	0.849	0.86	0.0931071	0	zgc:100829
rplp2l	3.90287e-06	0.102793	0.982	0.969	0.0986217	0	rplp2l
mibp2	3.90609e-06	0.280935	0.91	0.88	0.0987029	0	mibp2
plvapb.1	1.38023e-63	0.479113	1	1	3.4877e-59	1	plvapb
pecam1.1	4.62932e-42	0.564816	1	0.998	1.16978e-37	1	pecam1
si:ch211-156j16.1.1	3.21691e-34	0.320246	1	0.998	8.12882e-30	1	si:ch211-156j16.1
CABZ01030107.1	8.58296e-34	1.28462	0.815	0.64	2.16883e-29	1	CABZ01030107.1
cdh5.1	1.25696e-29	0.563757	1	0.969	3.1762e-25	1	cdh5
mcamb.1	4.76716e-29	0.807988	0.971	0.909	1.20461e-24	1	mcamb
polr2b.1	2.08562e-26	0.272775	1	1	5.27014e-22	1	polr2b
igfbp7.1	3.01381e-25	0.211982	1	1	7.61559e-21	1	igfbp7
ehd2b.1	1.85442e-23	0.767183	0.951	0.901	4.68593e-19	1	ehd2b
cav1.1	5.69447e-23	0.616347	0.979	0.944	1.43894e-18	1	cav1
rgcc.1	1.08321e-22	0.484447	0.963	0.922	2.73717e-18	1	rgcc
cldn5b.1	6.03252e-22	0.46345	0.971	0.965	1.52436e-17	1	cldn5b
hopx.1	3.07533e-21	0.468354	0.971	0.906	7.77104e-17	1	hopx
tmem108.1	7.50435e-21	0.465637	0.984	0.947	1.89627e-16	1	tmem108
pdgfbb.1	2.06982e-19	0.796233	0.901	0.846	5.23022e-15	1	pdgfbb
aqp8a.1.1	2.87022e-18	0.649489	0.934	0.885	7.25275e-14	1	aqp8a.1
krt18a.1.1	3.85793e-18	0.186702	1	1	9.74859e-14	1	krt18a.1
col4a1.1	8.60123e-17	0.527704	0.971	0.95	2.17344e-12	1	col4a1
scarb2a.1	2.33697e-16	0.379095	0.979	0.979	5.9053e-12	1	scarb2a
CABZ01076275.1.1	2.3689e-16	0.971793	0.786	0.661	5.98599e-12	1	CABZ01076275.1
crip2.1	2.87211e-16	0.348234	0.988	0.972	7.25753e-12	1	crip2
hspg2.1	3.41339e-16	0.793581	0.926	0.848	8.62529e-12	1	hspg2
podxl.1	1.20634e-15	0.345735	0.996	0.994	3.0483e-11	1	podxl
si:dkey-262k9.2	1.32933e-15	2.30361	0.436	0.227	3.35907e-11	1	si:dkey-262k9.2
col4a2.1	1.56958e-15	0.682905	0.909	0.829	3.96616e-11	1	col4a2
sox18.1	8.02071e-15	0.284443	1	0.991	2.02675e-10	1	sox18
plvapa.1	1.03527e-14	0.599286	0.967	0.939	2.61602e-10	1	plvapa
aplnra.1	1.05493e-14	0.652034	0.905	0.865	2.6657e-10	1	aplnra
krt8.1	5.49099e-14	0.145065	1	1	1.38752e-09	1	krt8
nrp1b.1	5.77919e-14	0.918736	0.728	0.573	1.46034e-09	1	nrp1b
abcg2a.1	8.29932e-14	0.380513	0.979	0.961	2.09715e-09	1	abcg2a
stc1	1.25529e-13	2.09175	0.337	0.153	3.17199e-09	1	stc1
cavin1b.1	1.44533e-12	0.54539	0.893	0.841	3.65221e-08	1	cavin1b
hlx1.1	1.84455e-12	0.376125	0.975	0.922	4.661e-08	1	hlx1
jam2a.1	3.10659e-12	0.250049	0.992	0.976	7.85005e-08	1	jam2a
apln.1	3.47068e-12	1.11898	0.733	0.591	8.77006e-08	1	apln
fli1a.1	5.29896e-12	0.169606	1	0.999	1.33899e-07	1	fli1a
scpp8	6.01213e-12	2.26386	0.296	0.136	1.5192e-07	1	scpp8
RPL37A	2.21304e-11	0.11749	1	0.996	5.59214e-07	1	RPL37A
ptmaa.1	7.34374e-11	0.426803	0.893	0.809	1.85569e-06	1	ptmaa
pim1.1	9.50147e-11	0.336793	0.975	0.976	2.40093e-06	1	pim1
robo4	1.60241e-10	0.365534	0.971	0.96	4.04912e-06	1	robo4
myo1ca.1	2.06301e-10	0.535057	0.942	0.894	5.21301e-06	1	myo1ca
LO017845.1.1	2.2208e-10	0.992507	0.49	0.298	5.61174e-06	1	LO017845.1
sh3tc2.1	2.36969e-10	0.394111	0.93	0.911	5.98796e-06	1	sh3tc2
rpl27	3.86034e-10	0.186003	0.947	0.919	9.75469e-06	1	rpl27
exoc3l2a.1	4.62285e-10	0.749654	0.786	0.702	1.16815e-05	1	exoc3l2a
rps28	6.22962e-10	0.130518	0.988	0.97	1.57416e-05	1	rps28
rpl36a	6.31971e-10	0.292252	0.942	0.845	1.59693e-05	1	rpl36a
crip1.1	1.05604e-09	0.358563	0.86	0.824	2.6685e-05	1	crip1
tspan5a.1	1.07683e-09	0.655605	0.782	0.686	2.72105e-05	1	tspan5a
aqp1a.1.1	1.13045e-09	0.294953	0.979	0.975	2.85654e-05	1	aqp1a.1
ushbp1.1	1.13189e-09	0.262513	0.988	0.957	2.86018e-05	1	ushbp1
tagln2	1.30225e-09	0.185884	0.992	0.983	3.29065e-05	1	tagln2
rps27.1	1.82281e-09	0.108349	1	0.99	4.60607e-05	1	rps27.1
plecb	1.87739e-09	0.314693	1	0.996	4.74398e-05	1	plecb
pkp3b.1	2.1891e-09	0.45775	0.955	0.911	5.53164e-05	1	pkp3b
rerea.1	2.39102e-09	0.487378	0.856	0.802	6.04186e-05	1	rerea
pcdh1b.1	2.87249e-09	0.412613	0.918	0.912	7.25849e-05	1	pcdh1b
bcl6b	4.7333e-09	0.559997	0.844	0.83	0.000119606	1	bcl6b
crema.1	5.83008e-09	0.950932	0.519	0.362	0.00014732	1	crema
faua	5.98913e-09	0.143774	0.992	0.98	0.000151339	1	faua
tshz2.1	6.24447e-09	0.777511	0.626	0.451	0.000157792	1	tshz2
esm1.1	8.12669e-09	0.635335	0.819	0.736	0.000205353	1	esm1
rbp1.1.1	8.15967e-09	2.72699	0.156	0.053	0.000206187	1	rbp1.1
lhx6	8.51998e-09	1.3872	0.486	0.323	0.000215291	1	lhx6
ecscr.1	9.93413e-09	0.362525	0.901	0.838	0.000251026	1	ecscr
flt1.1	1.08488e-08	0.329642	0.947	0.945	0.000274138	1	flt1
rbpms2a.1	1.14841e-08	0.754348	0.679	0.563	0.000290191	1	rbpms2a
rps16	1.19138e-08	0.11081	0.996	0.988	0.000301051	1	rps16
rpl31	1.31247e-08	0.125412	0.992	0.985	0.000331649	1	rpl31
rps29	1.6419e-08	0.135042	0.992	0.966	0.000414891	1	rps29
vwa1.1	1.71342e-08	0.22644	0.996	0.992	0.000432964	1	vwa1
itga1.1	2.14308e-08	0.771376	0.712	0.616	0.000541534	1	itga1
lhfpl2a.1	2.35355e-08	0.74755	0.667	0.567	0.000594719	1	lhfpl2a
lpl.1	3.1625e-08	0.394157	0.955	0.934	0.000799133	1	lpl
dll4.1	3.28673e-08	0.289172	0.988	0.977	0.000830524	1	dll4
rps25	3.94798e-08	0.17502	0.967	0.933	0.000997615	1	rps25
rpl35	5.26633e-08	0.104399	0.992	0.977	0.00133075	1	rpl35
rps26l	6.24428e-08	0.191109	0.984	0.955	0.00157787	1	rps26l
cd99.1	6.651e-08	0.598127	0.716	0.628	0.00168064	1	cd99
rapgef2.1	6.97832e-08	0.65436	0.807	0.709	0.00176335	1	rapgef2
prcp	7.07895e-08	0.461989	0.897	0.884	0.00178878	1	prcp
ldb2a.1	7.68028e-08	0.359263	0.971	0.931	0.00194073	1	ldb2a
ephb4a.1	7.70298e-08	0.388923	0.909	0.893	0.00194647	1	ephb4a
niban1b	7.85606e-08	0.75495	0.745	0.659	0.00198515	1	niban1b
tcf15	8.23893e-08	1.66822	0.342	0.213	0.00208189	1	tcf15
rpl35a	9.77239e-08	0.15525	0.984	0.969	0.00246939	1	rpl35a
rpl30	1.18007e-07	0.135658	1	0.981	0.00298192	1	rpl30
arl8.1	1.34157e-07	1.57263	0.3	0.167	0.00339001	1	arl8
mcf2l2.1	1.50058e-07	0.781779	0.7	0.622	0.00379181	1	mcf2l2
plxnb2b	1.95384e-07	0.988463	0.329	0.181	0.00493715	1	plxnb2b
casz1	2.62723e-07	1.72188	0.346	0.219	0.00663876	1	casz1
ednraa.1	2.69881e-07	0.207192	1	0.99	0.00681962	1	ednraa
si:dkey-19b23.8.1	2.75167e-07	0.344236	0.914	0.887	0.0069532	1	si:dkey-19b23.8
rps13	2.75406e-07	0.110036	0.979	0.974	0.00695923	1	rps13
rps27.2	3.00127e-07	0.227588	0.93	0.865	0.0075839	1	rps27.2
rps3	3.10515e-07	0.110317	1	0.999	0.00784642	1	rps3
shank3b.1	4.06782e-07	0.384455	0.918	0.905	0.010279	1	shank3b
clic4	4.25601e-07	0.313424	0.975	0.948	0.0107545	1	clic4
shroom4.1	4.70006e-07	0.434758	0.938	0.919	0.0118766	1	shroom4
sptbn1	5.47365e-07	0.398287	0.947	0.921	0.0138314	1	sptbn1
MAGI3.1	6.97107e-07	0.779776	0.642	0.545	0.0176152	1	MAGI3
kdrl.1	7.95281e-07	0.227292	1	0.998	0.020096	1	kdrl
rps17	9.5345e-07	0.219434	0.897	0.834	0.0240927	1	rps17
phlda2	9.68674e-07	0.999416	0.428	0.299	0.0244774	1	phlda2
rpl11	1.09731e-06	0.103777	0.996	0.987	0.0277279	1	rpl11
meox1	1.38698e-06	0.93369	0.658	0.635	0.0350475	1	meox1
sox7.1	1.8127e-06	0.248967	0.967	0.962	0.0458051	1	sox7
or109-11.1	2.24687e-06	1.77987	0.082	0.021	0.0567763	1	or109-11
jupa.1	2.36915e-06	0.269075	0.959	0.956	0.059866	1	jupa
wasf3b.1	2.40555e-06	0.150662	1	0.998	0.060786	1	wasf3b
jag2b.1	2.49141e-06	0.333879	0.947	0.932	0.0629553	1	jag2b
rps23	2.84396e-06	0.150129	0.971	0.943	0.0718639	1	rps23
clec14a.1	2.88874e-06	0.191475	0.988	0.979	0.0729956	1	clec14a
sema3ga	2.91807e-06	0.799382	0.601	0.5	0.0737367	1	sema3ga
igsf5b	2.96799e-06	2.24684	0.16	0.069	0.0749981	1	igsf5b
hey1	3.3189e-06	1.47512	0.251	0.136	0.0838653	1	hey1
dlc.1	3.46487e-06	0.325175	0.959	0.921	0.0875539	1	dlc
plekhg5a.1	3.47676e-06	0.292172	0.963	0.962	0.0878543	1	plekhg5a
rgs3a.1	3.48126e-06	0.331371	0.901	0.843	0.0879679	1	rgs3a
cxcr4a	3.88489e-06	0.814548	0.621	0.541	0.0981674	1	cxcr4a
ca4a.2	3.66584e-89	1.58481	0.994	0.713	9.26321e-85	2	ca4a
zgc:112332.1	1.89164e-87	1.53468	1	0.692	4.77998e-83	2	zgc:112332
foxf2b.2	4.82576e-69	2.10203	0.942	0.525	1.21942e-64	2	foxf2b
epas1a.1	3.76649e-63	1.38195	1	0.818	9.51753e-59	2	epas1a
pmp22b.1	6.96091e-62	0.487484	1	0.999	1.75895e-57	2	pmp22b
aplnrb.2	1.05876e-59	0.814498	1	0.964	2.67537e-55	2	aplnrb
six3a.2	3.56226e-55	1.75955	0.919	0.52	9.00147e-51	2	six3a
si:dkey-261h17.1.1	1.39294e-50	0.414872	1	0.998	3.51983e-46	2	si:dkey-261h17.1
foxf2a.2	3.80006e-48	1.64365	0.908	0.535	9.60238e-44	2	foxf2a
fkbp1b.1	4.59924e-48	1.65907	0.873	0.491	1.16218e-43	2	fkbp1b
pcdh1b.2	8.452e-44	1.00916	0.988	0.9	2.13574e-39	2	pcdh1b
aqp1a.1.2	3.27492e-43	0.688684	0.983	0.975	8.2754e-39	2	aqp1a.1
s1pr5a.2	9.3886e-43	1.05702	0.988	0.797	2.37241e-38	2	s1pr5a
tcima.1	1.05151e-42	0.606403	1	0.95	2.65706e-38	2	tcima
ehd4.2	4.79336e-42	0.524412	1	0.985	1.21123e-37	2	ehd4
acvrl1.1	6.80322e-42	0.779116	0.994	0.905	1.71911e-37	2	acvrl1
rgcc.2	6.6121e-41	0.698961	0.994	0.92	1.67081e-36	2	rgcc
ca16b.2	9.49029e-40	1.00932	1	0.89	2.3981e-35	2	ca16b
kdrl.2	2.37393e-39	0.465264	1	0.998	5.99869e-35	2	kdrl
vwa1.2	4.04427e-39	0.545642	1	0.991	1.02195e-34	2	vwa1
agtr1b.1	1.62812e-38	1.37027	0.913	0.637	4.11409e-34	2	agtr1b
myl9a.2	3.90767e-38	1.19997	0.879	0.615	9.87429e-34	2	myl9a
podxl.2	1.17153e-36	0.548121	1	0.993	2.96034e-32	2	podxl
id1.1	1.22852e-36	0.392467	1	0.974	3.10435e-32	2	id1
sgk1.1	4.01838e-36	0.518755	1	0.982	1.01541e-31	2	sgk1
amotl2a.1	1.1664e-35	0.711159	1	0.933	2.94737e-31	2	amotl2a
si:ch211-71m22.1.2	2.26664e-34	1.10818	0.942	0.667	5.72757e-30	2	si:ch211-71m22.1
ncam3.2	1.2229e-33	1.25616	0.948	0.661	3.09014e-29	2	ncam3
emid1	4.71102e-32	0.798263	0.977	0.912	1.19043e-27	2	emid1
cd22.2	8.90292e-32	2.11472	0.705	0.354	2.24968e-27	2	cd22
plvapa.2	4.82684e-31	0.753171	0.971	0.94	1.21969e-26	2	plvapa
rhbdd3.1	5.91629e-31	1.76914	0.647	0.264	1.49499e-26	2	rhbdd3
mob2b.1	9.85818e-30	0.89675	0.988	0.825	2.49106e-25	2	mob2b
plpp3.1	5.60628e-29	0.991338	0.954	0.78	1.41665e-24	2	plpp3
alpl.2	1.00314e-28	0.810534	0.988	0.774	2.53483e-24	2	alpl
basp1.2	1.19151e-28	2.50049	0.584	0.245	3.01081e-24	2	basp1
mgll.2	3.43637e-28	1.12239	0.942	0.614	8.68336e-24	2	mgll
ralgapa1.1	4.63757e-28	0.99873	0.971	0.797	1.17187e-23	2	ralgapa1
lfng.1	4.9235e-28	0.557257	1	0.958	1.24412e-23	2	lfng
znf536.2	7.64271e-28	2.05318	0.699	0.334	1.93124e-23	2	znf536
cyp2ad3.2	1.30347e-27	0.75642	0.977	0.812	3.29374e-23	2	cyp2ad3
s100v2.2	6.64166e-27	1.18866	0.844	0.58	1.67828e-22	2	s100v2
mmel1.1	2.43889e-26	1.4562	0.838	0.518	6.16282e-22	2	mmel1
flrt3.1	1.27602e-25	1.11111	0.936	0.745	3.22437e-21	2	flrt3
jam2a.2	1.65703e-25	0.387805	1	0.976	4.18715e-21	2	jam2a
klf2b.1	1.7317e-25	0.44218	1	0.965	4.37584e-21	2	klf2b
nrp1a.1	3.64328e-25	1.07919	0.931	0.667	9.2062e-21	2	nrp1a
chrng.2	4.20221e-25	1.97031	0.642	0.307	1.06186e-20	2	chrng
slc6a2.2	5.27456e-25	1.74144	0.798	0.506	1.33283e-20	2	slc6a2
ccn1l1.2	9.76504e-25	1.9304	0.688	0.414	2.46753e-20	2	ccn1l1
tek.1	1.30466e-24	0.574312	1	0.966	3.29675e-20	2	tek
dusp1.1	7.02855e-24	0.4506	1	0.968	1.77605e-19	2	dusp1
ptprb.1	2.45321e-23	0.550744	1	0.956	6.19903e-19	2	ptprb
plvapb.2	3.24437e-23	0.336147	1	1	8.19819e-19	2	plvapb
rasgrp3.1	3.87186e-23	1.05918	0.925	0.72	9.78379e-19	2	rasgrp3
sult2st3.2	4.04136e-23	1.71896	0.728	0.456	1.02121e-18	2	sult2st3
id3.1	7.58088e-23	0.866484	0.913	0.667	1.91561e-18	2	id3
ralgps2.2	1.4774e-22	1.52499	0.757	0.448	3.73323e-18	2	ralgps2
si:dkey-34d22.1.1	4.54102e-22	1.22892	0.809	0.482	1.14747e-17	2	si:dkey-34d22.1
vsir.1	6.41483e-22	1.3275	0.821	0.558	1.62096e-17	2	vsir
abcb4.1	1.26614e-21	0.853689	0.948	0.743	3.19941e-17	2	abcb4
cobll1a.2	1.87047e-21	2.33663	0.474	0.184	4.72649e-17	2	cobll1a
col8a2.2	2.46737e-21	2.24976	0.52	0.229	6.2348e-17	2	col8a2
zgc:113531.2	2.62826e-21	1.43813	0.694	0.398	6.64136e-17	2	zgc:113531
si:ch211-1a19.3.2	5.8409e-21	1.03684	0.867	0.527	1.47594e-16	2	si:ch211-1a19.3
timp4.1.2	6.68951e-21	1.37057	0.723	0.411	1.69037e-16	2	timp4.1
foxl2b.1	8.03604e-21	1.65474	0.584	0.265	2.03063e-16	2	foxl2b
trpm4a.2	1.54231e-20	1.70292	0.694	0.432	3.89727e-16	2	trpm4a
si:dkey-56m19.5.1	1.75349e-20	0.869035	0.925	0.717	4.43089e-16	2	si:dkey-56m19.5
chad.1	2.07934e-20	1.89796	0.659	0.372	5.25427e-16	2	chad
smox.1	3.67992e-20	0.611608	0.977	0.884	9.29879e-16	2	smox
bcl2l10.2	3.75126e-20	1.0697	0.803	0.499	9.47906e-16	2	bcl2l10
cpb1.1	4.10466e-20	1.76713	0.561	0.257	1.03721e-15	2	cpb1
pdgfba.1	5.53128e-20	0.729926	0.965	0.832	1.3977e-15	2	pdgfba
crip2.2	6.04077e-20	0.430589	1	0.971	1.52644e-15	2	crip2
krt94.1	1.6504e-19	0.551589	1	0.876	4.1704e-15	2	krt94
frem1b.1	2.05725e-19	1.0932	0.838	0.506	5.19848e-15	2	frem1b
si:dkey-49n23.1.1	4.53471e-19	0.832734	0.919	0.677	1.14588e-14	2	si:dkey-49n23.1
zgc:64106.2	4.71385e-19	0.753895	0.954	0.721	1.19114e-14	2	zgc:64106
spns2.2	1.05467e-18	0.553718	0.994	0.926	2.66503e-14	2	spns2
palm1b.1	1.20608e-18	0.589631	0.983	0.862	3.04765e-14	2	palm1b
rbpms2b.1	1.78946e-18	0.702574	0.942	0.743	4.52179e-14	2	rbpms2b
sox18.2	1.92833e-18	0.350959	0.994	0.992	4.87269e-14	2	sox18
ftr83.1	2.11179e-18	1.20115	0.728	0.438	5.33629e-14	2	ftr83
slc9a3r1b.1	4.55328e-18	0.761553	0.896	0.679	1.15057e-13	2	slc9a3r1b
tagln2.1	3.71319e-17	0.279096	0.988	0.984	9.38285e-13	2	tagln2
smad7.1	4.02103e-17	0.911368	0.827	0.646	1.01607e-12	2	smad7
il6r.1	7.37136e-17	1.1069	0.803	0.54	1.86267e-12	2	il6r
si:dkey-90l23.1.2	1.06051e-16	0.554072	0.931	0.836	2.6798e-12	2	si:dkey-90l23.1
exoc3l2a.2	1.43949e-16	0.948367	0.861	0.695	3.63746e-12	2	exoc3l2a
flrt2.1	1.75523e-16	1.78484	0.555	0.294	4.4353e-12	2	flrt2
CT956002.2.2	2.19333e-16	0.849612	0.844	0.622	5.54232e-12	2	CT956002.2
mcl1b.1	2.39035e-16	0.610135	0.954	0.804	6.04019e-12	2	mcl1b
LO017877.2.2	2.40224e-16	0.512096	0.936	0.807	6.07021e-12	2	LO017877.2
lpar1.1	2.41466e-16	0.747713	0.896	0.731	6.1016e-12	2	lpar1
foxl2a.1	2.93036e-16	2.01413	0.41	0.165	7.40472e-12	2	foxl2a
gmnn.2	3.02676e-16	0.734384	0.873	0.603	7.64833e-12	2	gmnn
gata3.2	5.29663e-16	1.31488	0.665	0.402	1.33841e-11	2	gata3
sema7a.2	8.81271e-16	0.816868	0.884	0.602	2.22688e-11	2	sema7a
mfng.2	9.09488e-16	0.634576	0.977	0.833	2.29819e-11	2	mfng
cdh5.2	1.13114e-15	0.463512	1	0.971	2.85828e-11	2	cdh5
crip3.1	1.18658e-15	0.996709	0.723	0.438	2.99836e-11	2	crip3
marcksl1b.2	1.22032e-15	0.1949	1	1	3.08364e-11	2	marcksl1b
ccl38.1.1	1.35335e-15	0.827453	0.809	0.569	3.41979e-11	2	ccl38.1
kalrnb.1	1.96659e-15	1.01118	0.832	0.629	4.96938e-11	2	kalrnb
si:dkey-19b23.8.2	1.99004e-15	0.56074	0.96	0.881	5.02862e-11	2	si:dkey-19b23.8
lpin2.1	2.05695e-15	1.17957	0.757	0.525	5.1977e-11	2	lpin2
etnk1.1	2.50741e-15	0.723217	0.936	0.75	6.33598e-11	2	etnk1
efnb1.1	2.57556e-15	1.8855	0.405	0.168	6.50818e-11	2	efnb1
shroom4.2	2.6433e-15	0.650854	0.988	0.912	6.67935e-11	2	shroom4
h1m.2	4.80023e-15	0.616542	0.913	0.747	1.21297e-10	2	h1m
si:ch211-156j16.1.2	5.91561e-15	0.245495	1	0.998	1.49481e-10	2	si:ch211-156j16.1
znf366.1	7.26462e-15	1.07087	0.717	0.472	1.8357e-10	2	znf366
si:dkeyp-97a10.2	8.90469e-15	0.324464	0.994	0.967	2.25013e-10	2	si:dkeyp-97a10.2
htra3a.1	1.32762e-14	2.50449	0.301	0.098	3.35476e-10	2	htra3a
zp3e.2	1.43995e-14	0.741315	0.861	0.61	3.63861e-10	2	zp3e
selenbp1.1	1.74758e-14	0.65859	0.919	0.789	4.41596e-10	2	selenbp1
nkain4.1	1.77629e-14	1.5382	0.497	0.244	4.4885e-10	2	nkain4
si:dkey-38p12.3.1	1.90483e-14	0.801	0.884	0.676	4.81332e-10	2	si:dkey-38p12.3
ephb4b	2.29865e-14	0.442512	1	0.967	5.80847e-10	2	ephb4b
fxyd1.2	2.31978e-14	0.649736	0.867	0.708	5.86186e-10	2	fxyd1
tmem88b.2	3.16807e-14	0.459858	0.971	0.868	8.00539e-10	2	tmem88b
zgc:171686.1	3.41815e-14	0.979603	0.757	0.529	8.63731e-10	2	zgc:171686
tcf7l1a.1	4.06322e-14	0.911828	0.798	0.586	1.02673e-09	2	tcf7l1a
BX324216.4.1	7.60943e-14	1.03076	0.659	0.389	1.92283e-09	2	BX324216.4
lrrc15.1	1.12483e-13	0.584413	0.977	0.755	2.84233e-09	2	lrrc15
id2a.1	1.13088e-13	1.05961	0.705	0.51	2.85762e-09	2	id2a
plk2b.1	1.13766e-13	0.18865	1	1	2.87476e-09	2	plk2b
mao.1	1.66917e-13	1.29422	0.676	0.449	4.21781e-09	2	mao
galnt18b.1	1.7123e-13	1.19319	0.642	0.385	4.3268e-09	2	galnt18b
ndufa4l2a.1	2.33089e-13	1.4226	0.445	0.203	5.88993e-09	2	ndufa4l2a
metrn.2	2.42665e-13	0.721676	0.827	0.541	6.1319e-09	2	metrn
zgc:158423.2	2.47761e-13	0.558433	0.931	0.633	6.26066e-09	2	zgc:158423
rgs3b.1	2.95526e-13	0.790672	0.827	0.627	7.46764e-09	2	rgs3b
rasal2.1	2.96495e-13	0.867605	0.821	0.618	7.49212e-09	2	rasal2
flot2a.1	4.75205e-13	0.300137	1	0.98	1.2008e-08	2	flot2a
zgc:153499.2	5.11419e-13	0.688206	0.855	0.61	1.29231e-08	2	zgc:153499
cav2.1	5.46578e-13	0.794339	0.855	0.676	1.38115e-08	2	cav2
si:ch211-195o20.7.2	5.87014e-13	1.25147	0.618	0.358	1.48333e-08	2	si:ch211-195o20.7
egln1a.1	5.88701e-13	2.13496	0.243	0.072	1.48759e-08	2	egln1a
ugt1a1.1	6.01185e-13	0.889287	0.711	0.443	1.51913e-08	2	ugt1a1
rpp25b.2	6.41603e-13	0.813081	0.734	0.526	1.62127e-08	2	rpp25b
edn1.2	6.44242e-13	0.738324	0.838	0.589	1.62794e-08	2	edn1
ppap2d.1	7.26062e-13	1.56298	0.509	0.283	1.83469e-08	2	ppap2d
fkbp5.1	8.41173e-13	0.419255	0.988	0.925	2.12556e-08	2	fkbp5
tjp2b.1	9.7565e-13	0.618522	0.913	0.781	2.46537e-08	2	tjp2b
vat1	1.00933e-12	0.338581	1	0.996	2.55047e-08	2	vat1
emilin2a.2	1.03119e-12	0.818138	0.815	0.562	2.60571e-08	2	emilin2a
f2rl2.1	1.07469e-12	0.647672	0.919	0.641	2.71564e-08	2	f2rl2
sc:d189.1	1.1078e-12	0.671412	0.902	0.613	2.79929e-08	2	sc:d189
CT990561.1.2	1.38111e-12	2.72268	0.318	0.126	3.48994e-08	2	CT990561.1
ddit4.1	1.53222e-12	0.504837	0.931	0.817	3.87177e-08	2	ddit4
csrp2.1	1.643e-12	0.784156	0.775	0.539	4.1517e-08	2	csrp2
heg1.1	1.81757e-12	0.628778	0.913	0.788	4.59282e-08	2	heg1
fzd4	2.0856e-12	0.582499	0.96	0.899	5.2701e-08	2	fzd4
si:ch211-132b12.7.2	2.50257e-12	0.692776	0.844	0.646	6.32375e-08	2	si:ch211-132b12.7
plpp1a.2	2.51676e-12	0.449653	0.983	0.856	6.35959e-08	2	plpp1a
hopx.2	2.97497e-12	0.398181	0.977	0.909	7.51745e-08	2	hopx
rgs5a.1	3.19362e-12	1.31172	0.549	0.307	8.06996e-08	2	rgs5a
nr2f1a.2	3.84263e-12	0.530127	0.988	0.806	9.70994e-08	2	nr2f1a
farp2.1	4.26158e-12	1.73212	0.416	0.199	1.07686e-07	2	farp2
cyp2ad6.1	4.37187e-12	1.02663	0.642	0.396	1.10473e-07	2	cyp2ad6
cxcl12b.2	6.30752e-12	0.737721	0.792	0.576	1.59385e-07	2	cxcl12b
krt93.2	6.46187e-12	1.20777	0.451	0.217	1.63285e-07	2	krt93
spock3.1	7.10082e-12	0.614161	0.855	0.561	1.79431e-07	2	spock3
stox1.1	7.36301e-12	0.698446	0.902	0.838	1.86056e-07	2	stox1
hlx1.2	7.37792e-12	0.393951	0.977	0.926	1.86433e-07	2	hlx1
epas1b.1	7.47192e-12	0.535061	0.994	0.857	1.88808e-07	2	epas1b
slc44a2.1	7.79292e-12	0.392379	0.994	0.967	1.96919e-07	2	slc44a2
LRATD2.1	8.49254e-12	0.67325	0.85	0.611	2.14598e-07	2	LRATD2
prss23.2	8.55909e-12	0.831289	0.78	0.55	2.1628e-07	2	prss23
hspa12a.1	1.07283e-11	0.659553	0.838	0.664	2.71094e-07	2	hspa12a
pitpnm3.1	1.09032e-11	1.36466	0.543	0.316	2.75513e-07	2	pitpnm3
CU927890.1.1	1.12584e-11	0.381128	0.988	0.947	2.8449e-07	2	CU927890.1
si:dkey-27i16.2.1	1.2679e-11	1.13427	0.543	0.325	3.20385e-07	2	si:dkey-27i16.2
her6	1.40146e-11	0.69621	0.855	0.688	3.54136e-07	2	her6
adgra2.1	1.66541e-11	0.929843	0.751	0.571	4.20833e-07	2	adgra2
qki2.2	1.73667e-11	0.693188	0.809	0.599	4.3884e-07	2	qki2
si:dkey-229d11.5.2	1.78093e-11	0.417875	0.965	0.9	4.50023e-07	2	si:dkey-229d11.5
ftr82.2	3.35862e-11	0.503381	0.971	0.822	8.4869e-07	2	ftr82
si:dkey-121b10.7.1	3.51686e-11	2.82458	0.162	0.039	8.88674e-07	2	si:dkey-121b10.7
fam83ha.1	3.83571e-11	0.779759	0.879	0.715	9.69245e-07	2	fam83ha
ccn2a.1	4.24534e-11	0.533341	0.936	0.824	1.07275e-06	2	ccn2a
flt4.2	5.26317e-11	0.350297	1	0.993	1.32995e-06	2	flt4
ncalda.1	6.14969e-11	0.26632	0.988	0.971	1.55396e-06	2	ncalda
nkd2a.2	6.67058e-11	1.37705	0.491	0.279	1.68559e-06	2	nkd2a
si:ch211-225h24.2.2	7.0779e-11	0.783892	0.699	0.474	1.78851e-06	2	si:ch211-225h24.2
si:dkeyp-23e4.3.1	7.8969e-11	0.84847	0.751	0.562	1.99547e-06	2	si:dkeyp-23e4.3
hpgd.1	8.0914e-11	1.80246	0.416	0.228	2.04461e-06	2	hpgd
ctdnep1b.2	8.36503e-11	0.607499	0.838	0.599	2.11376e-06	2	ctdnep1b
si:dkey-229d11.3.2	8.47656e-11	0.377747	0.988	0.943	2.14194e-06	2	si:dkey-229d11.3
hspa12b.1	8.77315e-11	0.477283	0.977	0.834	2.21689e-06	2	hspa12b
slc2a1a.2	9.01055e-11	0.616492	0.751	0.456	2.27688e-06	2	slc2a1a
tmem204.1	9.54012e-11	0.470698	0.919	0.821	2.41069e-06	2	tmem204
slco2a1.2	1.00174e-10	1.01049	0.63	0.391	2.5313e-06	2	slco2a1
vegfc.1	1.05033e-10	0.929533	0.671	0.435	2.65408e-06	2	vegfc
rasgef1ba.1	1.17526e-10	0.526004	0.908	0.777	2.96976e-06	2	rasgef1ba
bmp16.2	1.41211e-10	0.490816	0.988	0.901	3.56827e-06	2	bmp16
si:dkey-126g1.9.1	1.43736e-10	0.519281	0.896	0.724	3.63207e-06	2	si:dkey-126g1.9
atoh8.2	1.90604e-10	0.769765	0.78	0.565	4.81637e-06	2	atoh8
jag2b.2	1.94048e-10	0.44585	0.994	0.925	4.9034e-06	2	jag2b
tuft1a.1	2.11026e-10	0.790967	0.803	0.608	5.33243e-06	2	tuft1a
calcrla.1	2.13155e-10	0.574351	0.896	0.68	5.38623e-06	2	calcrla
llgl2.1	2.22474e-10	0.67177	0.867	0.712	5.6217e-06	2	llgl2
lpar6a.1	2.30338e-10	0.611726	0.798	0.567	5.82042e-06	2	lpar6a
dusp5.1	2.38833e-10	0.290395	0.983	0.968	6.03506e-06	2	dusp5
rtn1a.1	2.76074e-10	0.544373	0.908	0.772	6.9761e-06	2	rtn1a
sorbs2b.1	2.98761e-10	0.858898	0.734	0.535	7.54939e-06	2	sorbs2b
ccn1l2.1	3.00086e-10	0.467654	0.983	0.919	7.58286e-06	2	ccn1l2
smad6a.1	3.55801e-10	0.565486	0.855	0.655	8.99074e-06	2	smad6a
CABZ01027646.1.1	3.74524e-10	1.99571	0.387	0.192	9.46385e-06	2	CABZ01027646.1
slc29a1a.1	4.22839e-10	1.1034	0.676	0.505	1.06847e-05	2	slc29a1a
gulp1b.1	4.24319e-10	1.01015	0.601	0.392	1.07221e-05	2	gulp1b
sh3bp4.1	4.60336e-10	0.662864	0.786	0.56	1.16322e-05	2	sh3bp4
smad6b.1	6.41572e-10	0.604276	0.896	0.716	1.62119e-05	2	smad6b
cyp2ad2.1	7.40438e-10	0.715003	0.584	0.32	1.87101e-05	2	cyp2ad2
sall4.2	7.98453e-10	0.706525	0.653	0.406	2.01761e-05	2	sall4
epb41l4a.1	8.36937e-10	0.523103	0.908	0.704	2.11486e-05	2	epb41l4a
palm1a.1	9.03349e-10	0.491208	0.919	0.766	2.28267e-05	2	palm1a
perp.2	9.32564e-10	0.293889	1	0.982	2.3565e-05	2	perp
rasip1	9.35407e-10	0.274153	1	0.992	2.36368e-05	2	rasip1
itsn2a.1	9.6517e-10	1.55578	0.347	0.156	2.43889e-05	2	itsn2a
insra.1	9.83065e-10	0.506682	0.96	0.846	2.48411e-05	2	insra
znf395b.2	1.31982e-09	0.651477	0.792	0.591	3.33505e-05	2	znf395b
si:ch211-157b11.14.1	1.38683e-09	1.49702	0.312	0.134	3.50438e-05	2	si:ch211-157b11.14
cemip.1	1.49363e-09	1.93566	0.254	0.098	3.77426e-05	2	cemip
exoc3l1	1.77955e-09	0.43186	0.925	0.91	4.49674e-05	2	exoc3l1
zgc:65851.1	2.05738e-09	0.451047	0.78	0.449	5.19879e-05	2	zgc:65851
tnfsf10l.1	2.08337e-09	0.797556	0.746	0.531	5.26446e-05	2	tnfsf10l
pttg1ipb.1	2.24311e-09	0.758561	0.566	0.329	5.66811e-05	2	pttg1ipb
lamb1a.1	2.24626e-09	0.544433	0.925	0.804	5.67607e-05	2	lamb1a
sh3gl1b.1	2.2975e-09	0.438621	0.861	0.698	5.80556e-05	2	sh3gl1b
cyp1c1.2	2.35381e-09	0.976344	0.676	0.487	5.94785e-05	2	cyp1c1
lifrb.1	2.60256e-09	0.704001	0.786	0.626	6.57641e-05	2	lifrb
dhcr7.1	2.60757e-09	0.465755	0.746	0.521	6.58908e-05	2	dhcr7
lpl.2	3.15136e-09	0.411086	0.948	0.937	7.96317e-05	2	lpl
bhlhe40.2	3.90791e-09	0.518482	0.925	0.781	9.8749e-05	2	bhlhe40
CABZ01067151.1.1	3.95442e-09	0.778508	0.671	0.497	9.99244e-05	2	CABZ01067151.1
map1sb.1	4.04771e-09	0.974521	0.52	0.308	0.000102282	2	map1sb
SLC16A7.2	4.06473e-09	0.447661	0.884	0.603	0.000102712	2	SLC16A7
CABZ01032488.1.2	4.4939e-09	0.443768	0.931	0.772	0.000113556	2	CABZ01032488.1
ephb4a.2	4.75732e-09	0.428458	0.96	0.886	0.000120213	2	ephb4a
ACKR2.1	4.78672e-09	1.15109	0.514	0.326	0.000120956	2	ACKR2
spry4.1	4.98255e-09	0.44812	0.96	0.913	0.000125904	2	spry4
fzd8a.1	6.0519e-09	1.34252	0.399	0.203	0.000152925	2	fzd8a
slco3a1.1	6.9327e-09	0.9132	0.647	0.453	0.000175182	2	slco3a1
foxp1b	7.08517e-09	0.569201	0.844	0.658	0.000179035	2	foxp1b
grb10a.1	7.24006e-09	0.322665	0.994	0.96	0.000182949	2	grb10a
vamp3.1	7.71819e-09	0.353348	0.971	0.866	0.000195031	2	vamp3
klf17.1	8.07223e-09	0.584438	0.827	0.625	0.000203977	2	klf17
anxa13	8.54027e-09	0.224967	1	0.992	0.000215804	2	anxa13
sptlc2a.1	1.0406e-08	0.404612	0.96	0.863	0.000262948	2	sptlc2a
CABZ01046949.1.2	1.28605e-08	0.677614	0.699	0.502	0.000324971	2	CABZ01046949.1
inka1a.1	1.36347e-08	1.24606	0.561	0.415	0.000344535	2	inka1a
tnfrsf9a.2	1.46195e-08	0.724585	0.486	0.269	0.00036942	2	tnfrsf9a
ythdf2.1	1.60969e-08	0.379936	0.954	0.86	0.000406752	2	ythdf2
zgc:110626	1.65869e-08	0.494627	0.867	0.774	0.000419134	2	zgc:110626
pacsin3.1	1.69333e-08	0.856885	0.63	0.445	0.000427887	2	pacsin3
slc16a1a.2	1.79079e-08	0.508751	0.74	0.505	0.000452516	2	slc16a1a
dync1li2.1	1.9728e-08	0.587784	0.855	0.687	0.000498507	2	dync1li2
cyp2p6.1	2.01746e-08	0.6661	0.642	0.42	0.000509793	2	cyp2p6
calr	2.25646e-08	0.618604	0.792	0.615	0.000570184	2	calr
slco1c1.2	2.28476e-08	0.452204	0.769	0.489	0.000577336	2	slco1c1
slc38a3a.2	2.6834e-08	0.44707	0.775	0.519	0.000678068	2	slc38a3a
BX544877.2	2.85552e-08	1.31049	0.289	0.128	0.000721562	2	BX544877.2
adra1aa.1	2.92e-08	0.99663	0.503	0.301	0.000737854	2	adra1aa
id2b.2	3.07329e-08	0.700718	0.682	0.493	0.000776589	2	id2b
efnb2a.2	3.07848e-08	0.583795	0.855	0.711	0.000777902	2	efnb2a
bmp6.2	3.21784e-08	0.93544	0.607	0.438	0.000813117	2	bmp6
elf2b.1	3.44817e-08	0.707309	0.728	0.551	0.000871318	2	elf2b
sost	3.51931e-08	1.88702	0.243	0.101	0.000889294	2	sost
bambia.2	4.08622e-08	0.349449	0.965	0.931	0.00103255	2	bambia
sema6a.1	4.38572e-08	0.73902	0.699	0.537	0.00110823	2	sema6a
cyp1a.1	4.45534e-08	0.507449	0.844	0.635	0.00112582	2	cyp1a
camk2g2.1	5.02281e-08	0.850702	0.59	0.396	0.00126921	2	camk2g2
map4k2.1	5.04561e-08	0.328168	0.994	0.938	0.00127498	2	map4k2
kifap3a	5.34764e-08	1.10585	0.468	0.283	0.0013513	2	kifap3a
cebpd.1	5.517e-08	0.331523	0.994	0.942	0.00139409	2	cebpd
appb	5.53103e-08	0.298973	1	0.983	0.00139764	2	appb
zgc:153311	5.86006e-08	0.944526	0.636	0.486	0.00148078	2	zgc:153311
rbms3.1	6.15689e-08	0.497561	0.867	0.724	0.00155578	2	rbms3
lef1.2	6.17745e-08	0.468168	0.711	0.46	0.00156098	2	lef1
slc26a10.1	6.29596e-08	0.969876	0.642	0.487	0.00159093	2	slc26a10
pdgfbb.2	6.39285e-08	0.432063	0.954	0.841	0.00161541	2	pdgfbb
emp2.2	6.71103e-08	0.464453	0.855	0.785	0.00169581	2	emp2
efnb2b.2	6.78436e-08	0.532805	0.815	0.694	0.00171434	2	efnb2b
strip1.1	6.90728e-08	0.461373	0.861	0.72	0.0017454	2	strip1
tmcc3.1	7.01793e-08	0.715417	0.717	0.555	0.00177336	2	tmcc3
mrap2a.1	7.80152e-08	2.10203	0.249	0.113	0.00197137	2	mrap2a
slc7a5.2	8.51868e-08	0.335966	0.879	0.641	0.00215259	2	slc7a5
ppp1r13l.1	9.08104e-08	0.781061	0.613	0.392	0.00229469	2	ppp1r13l
atxn7l2a	1.00792e-07	1.03071	0.393	0.21	0.0025469	2	atxn7l2a
gpx1a.1	1.01358e-07	0.826695	0.572	0.407	0.00256121	2	gpx1a
arhgef2	1.01966e-07	1.11177	0.335	0.168	0.00257658	2	arhgef2
nectin3b.2	1.04191e-07	1.09697	0.514	0.338	0.0026328	2	nectin3b
ifngr2	1.09797e-07	0.583209	0.757	0.585	0.00277446	2	ifngr2
lrp1ba.1	1.14965e-07	0.867405	0.688	0.536	0.00290505	2	lrp1ba
rapgef5a	1.23965e-07	0.835331	0.63	0.474	0.00313247	2	rapgef5a
plaub	1.46849e-07	2.72959	0.11	0.027	0.00371072	2	plaub
sema6d.1	1.52432e-07	0.453316	0.913	0.837	0.00385181	2	sema6d
kif13a.1	1.53759e-07	1.07212	0.509	0.33	0.00388533	2	kif13a
tbx2b.1	1.5463e-07	0.804771	0.653	0.473	0.00390733	2	tbx2b
rnf144ab	1.85208e-07	0.490301	0.855	0.712	0.00468002	2	rnf144ab
larp4ab.1	1.87584e-07	0.632916	0.757	0.562	0.00474006	2	larp4ab
tspan4a.1	1.95137e-07	0.580007	0.792	0.645	0.00493091	2	tspan4a
si:ch211-212g7.6.2	2.09005e-07	0.653843	0.803	0.674	0.00528135	2	si:ch211-212g7.6
limch1b.2	2.12533e-07	0.319957	1	0.961	0.0053705	2	limch1b
bmpr2b.1	2.30536e-07	0.772556	0.682	0.502	0.00582541	2	bmpr2b
slc12a2.1	2.55108e-07	0.436129	0.954	0.854	0.00644631	2	slc12a2
hpca.1	2.64319e-07	0.539692	0.821	0.677	0.00667908	2	hpca
gstr.1	2.70792e-07	0.413781	0.908	0.74	0.00684265	2	gstr
sept7a.1	2.73744e-07	0.293913	0.965	0.92	0.00691724	2	sept7a
sat1a.1	2.92828e-07	0.879978	0.428	0.245	0.00739947	2	sat1a.1
nfe2l2a.2	2.99443e-07	0.321685	0.988	0.944	0.00756663	2	nfe2l2a
ptpro:1.1	3.03326e-07	0.608016	0.63	0.445	0.00766475	2	ptpro:1
hdr	3.25018e-07	2.08697	0.191	0.073	0.00821288	2	hdr
ak1.1	3.29534e-07	0.404033	0.896	0.768	0.00832698	2	ak1
tm9sf1.2	3.5018e-07	0.779708	0.428	0.244	0.00884869	2	tm9sf1
cdc42ep1a.1	3.57442e-07	0.657062	0.653	0.458	0.0090322	2	cdc42ep1a
supv3l1.1	3.63562e-07	0.798274	0.462	0.272	0.00918686	2	supv3l1
hgfb	3.69176e-07	2.1869	0.214	0.093	0.0093287	2	hgfb
tspan5a.2	3.73799e-07	0.604129	0.769	0.694	0.00944553	2	tspan5a
arhgef12b.2	3.80665e-07	0.455122	0.936	0.809	0.00961903	2	arhgef12b
foxp2.1	3.97833e-07	1.55706	0.231	0.101	0.0100528	2	foxp2
cavin2a.1	4.14288e-07	0.63747	0.613	0.409	0.0104686	2	cavin2a
itpk1a	4.23603e-07	3.89496	0.052	0.006	0.010704	2	itpk1a
CABZ01118575.1.1	4.40092e-07	0.772858	0.578	0.408	0.0111207	2	CABZ01118575.1
gnai2a.1	4.82974e-07	0.250793	1	0.966	0.0122043	2	gnai2a
ptbp3.1	4.89206e-07	0.462493	0.844	0.738	0.0123617	2	ptbp3
slco1d1.1	4.94214e-07	0.284095	0.884	0.688	0.0124883	2	slco1d1
nr1d4a	5.0459e-07	3.13815	0.069	0.012	0.0127505	2	nr1d4a
msi2a.1	5.04761e-07	0.885349	0.532	0.36	0.0127548	2	msi2a
rnd3a.2	5.07582e-07	0.566941	0.855	0.81	0.0128261	2	rnd3a
si:dkey-76b14.2	5.53272e-07	3.50136	0.04	0.003	0.0139806	2	si:dkey-76b14.2
retsatl.1	5.5482e-07	2.11379	0.104	0.026	0.0140198	2	retsatl
baiap2b:1.1	5.85591e-07	1.26916	0.237	0.104	0.0147973	2	baiap2b:1
tgm1l1.1	5.86749e-07	0.646742	0.728	0.596	0.0148266	2	tgm1l1
rab40b.1	5.88809e-07	1.0269	0.526	0.37	0.0148786	2	rab40b
ciarta.1	6.25579e-07	0.430101	0.925	0.753	0.0158077	2	ciarta
sdf4.1	6.47871e-07	0.718114	0.682	0.541	0.0163711	2	sdf4
scarb2a.2	6.52828e-07	0.267636	0.994	0.977	0.0164963	2	scarb2a
fam171a1.1	6.67952e-07	0.418995	0.821	0.617	0.0168785	2	fam171a1
itm2ba.1	6.69124e-07	0.154369	1	0.996	0.0169081	2	itm2ba
her9.1	6.73228e-07	0.774309	0.624	0.455	0.0170118	2	her9
ical1.1	6.94069e-07	1.32889	0.231	0.1	0.0175384	2	ical1
mcm5.1	7.04724e-07	0.446664	0.861	0.701	0.0178077	2	mcm5
lig1	7.17068e-07	1.00227	0.416	0.249	0.0181196	2	lig1
mmrn2b.1	7.35009e-07	0.757077	0.659	0.485	0.018573	2	mmrn2b
glulb.1	7.6409e-07	0.393819	0.913	0.817	0.0193078	2	glulb
srgn.1	7.98788e-07	0.20776	1	0.975	0.0201846	2	srgn
itgb1b.3	8.51721e-07	0.407165	0.89	0.719	0.0215221	2	itgb1b
shroom3	8.84205e-07	1.65165	0.312	0.174	0.022343	2	shroom3
anks1b.1	9.27414e-07	0.330102	0.977	0.946	0.0234348	2	anks1b
zgc:173544.1	9.52799e-07	0.484715	0.844	0.762	0.0240763	2	zgc:173544
ackr3a	9.65565e-07	1.03399	0.214	0.088	0.0243989	2	ackr3a
pygmb	1.02785e-06	1.50525	0.168	0.062	0.0259727	2	pygmb
cyth1a:1.1	1.03042e-06	0.497747	0.919	0.807	0.0260376	2	cyth1a:1
cyp8b2	1.04546e-06	1.94987	0.133	0.042	0.0264178	2	cyp8b2
RASSF5.1	1.05528e-06	0.839201	0.439	0.261	0.0266658	2	RASSF5
tbx3a.1	1.11212e-06	0.464298	0.699	0.492	0.0281021	2	tbx3a
CABZ01040999.1.1	1.13344e-06	1.0179	0.457	0.304	0.028641	2	CABZ01040999.1
ints3.1	1.16469e-06	0.463364	0.694	0.478	0.0294306	2	ints3
fbrsl1	1.2633e-06	0.693919	0.52	0.339	0.0319224	2	fbrsl1
bgnb.1	1.32919e-06	0.957668	0.422	0.253	0.0335874	2	bgnb
dlc.2	1.33645e-06	0.343723	0.965	0.923	0.0337708	2	dlc
ahnak	1.3776e-06	0.390591	0.965	0.972	0.0348106	2	ahnak
CU459094.2	1.41103e-06	1.10705	0.358	0.201	0.0356553	2	CU459094.2
sprb	1.53624e-06	4.36628	0.029	0.001	0.0388193	2	sprb
prim2.1	1.62204e-06	0.795526	0.434	0.256	0.0409872	2	prim2
lpin1.1	1.67024e-06	0.468326	0.861	0.743	0.0422054	2	lpin1
rrm1	1.67081e-06	0.437524	0.827	0.704	0.0422196	2	rrm1
ccser2a	1.67483e-06	1.53458	0.301	0.161	0.0423213	2	ccser2a
akap12b.1	1.6807e-06	0.274399	0.988	0.984	0.0424695	2	akap12b
amotl2b.1	1.77601e-06	0.654838	0.717	0.564	0.044878	2	amotl2b
zfpm1.1	1.85737e-06	0.664813	0.532	0.346	0.0469338	2	zfpm1
ro60.1	1.86918e-06	0.808962	0.497	0.324	0.0472322	2	ro60
nt5c3a.1	1.8982e-06	0.597967	0.665	0.508	0.0479657	2	nt5c3a
fam174b.1	1.93093e-06	0.207616	0.994	0.979	0.0487926	2	fam174b
AL954137.2	1.96167e-06	2.65639	0.075	0.016	0.0495694	2	AL954137.2
si:dkeyp-73d8.6.2	2.06625e-06	1.21938	0.214	0.092	0.052212	2	si:dkeyp-73d8.6
kirrel3l.1	2.11582e-06	0.416611	0.884	0.731	0.0534646	2	kirrel3l
cited1.1	2.11912e-06	0.515392	0.775	0.579	0.0535479	2	cited1
ccnd1.2	2.14313e-06	0.364436	0.96	0.808	0.0541546	2	ccnd1
ube2al.2	2.18011e-06	0.493593	0.688	0.525	0.0550891	2	ube2al
lmo4a.1	2.25225e-06	0.330944	0.971	0.853	0.0569122	2	lmo4a
adipor2.1	2.25371e-06	0.325314	0.983	0.91	0.056949	2	adipor2
stk3.2	2.43804e-06	0.426905	0.827	0.666	0.0616068	2	stk3
ppp3ca.1	2.47355e-06	1.24399	0.231	0.108	0.0625042	2	ppp3ca
itga6b.2	2.4746e-06	0.696519	0.665	0.524	0.0625306	2	itga6b
gpm6aa.2	2.49144e-06	0.779692	0.659	0.506	0.0629563	2	gpm6aa
myo18ab.1	2.50183e-06	0.588474	0.78	0.645	0.0632188	2	myo18ab
smad9.1	2.5455e-06	0.503277	0.757	0.602	0.0643222	2	smad9
per3.1	2.59266e-06	0.346608	0.971	0.872	0.0655138	2	per3
tdh.2	2.60323e-06	0.51943	0.821	0.741	0.0657811	2	tdh
ankrd54.1	2.65894e-06	0.92812	0.312	0.165	0.0671887	2	ankrd54
si:ch211-59o9.10.1	2.72071e-06	0.874241	0.405	0.242	0.0687495	2	si:ch211-59o9.10
morf4l1.1	2.81463e-06	0.482993	0.775	0.612	0.0711228	2	morf4l1
abcc2.1	2.94806e-06	0.245948	0.919	0.671	0.0744944	2	abcc2
arhgap27l	2.97442e-06	0.415064	0.942	0.83	0.0751607	2	arhgap27l
rxraa	2.98521e-06	0.640033	0.624	0.455	0.0754332	2	rxraa
dennd2b	2.99528e-06	0.612864	0.688	0.521	0.0756876	2	dennd2b
tnfrsfa.1	3.01247e-06	0.388442	0.884	0.803	0.076122	2	tnfrsfa
nfixb	3.29957e-06	1.72613	0.225	0.104	0.0833768	2	nfixb
si:ch211-114n24.6	3.52885e-06	0.454363	0.78	0.603	0.0891705	2	si:ch211-114n24.6
snai2.1	3.57177e-06	0.844525	0.613	0.467	0.0902551	2	snai2
notch1a.1	3.59948e-06	0.46749	0.855	0.735	0.0909552	2	notch1a
ppfibp1a.1	3.64711e-06	0.378428	0.902	0.758	0.0921588	2	ppfibp1a
si:ch211-145b13.6.1	3.71938e-06	0.271598	0.988	0.903	0.093985	2	si:ch211-145b13.6
bmi1b.1	3.88517e-06	0.899881	0.301	0.157	0.0981744	2	bmi1b
rpa1	3.89715e-06	0.451713	0.832	0.688	0.0984772	2	rpa1
pla2g12b.2	1.95507e-93	2.36125	0.976	0.558	4.94027e-89	3	pla2g12b
oit3.2	2.28387e-89	1.58915	0.988	0.745	5.77111e-85	3	oit3
aoc2.2	1.26752e-88	0.873548	1	0.991	3.20289e-84	3	aoc2
myo1hb.2	3.58951e-76	1.66658	0.976	0.79	9.07032e-72	3	myo1hb
ponzr1.2	5.67721e-75	0.697381	1	0.957	1.43457e-70	3	ponzr1
tmem88a.1	4.24163e-67	0.653073	1	0.97	1.07182e-62	3	tmem88a
ehd3.2	1.46736e-62	1.78932	0.964	0.666	3.70787e-58	3	ehd3
igfbp1a.3	3.26008e-56	0.722798	0.994	0.971	8.23789e-52	3	igfbp1a
adma.2	1.72287e-51	0.908294	1	0.944	4.35353e-47	3	adma
emilin1b.3	1.59659e-50	0.832986	1	0.989	4.03443e-46	3	emilin1b
serpinf1.2	5.02129e-50	1.38939	0.97	0.773	1.26883e-45	3	serpinf1
igfbp7.3	2.40489e-44	0.288959	1	1	6.07692e-40	3	igfbp7
polr2b.3	5.46649e-43	0.359625	1	1	1.38133e-38	3	polr2b
tfpia.2	8.58118e-40	2.07507	0.74	0.334	2.16838e-35	3	tfpia
mmrn2a.2	3.19678e-38	0.714561	0.994	0.951	8.07795e-34	3	mmrn2a
fabp10a.1	4.97165e-36	2.8798	0.426	0.087	1.25629e-31	3	fabp10a
prdx1.3	1.21823e-34	0.894794	0.953	0.777	3.07835e-30	3	prdx1
marcksl1b.3	3.02803e-34	0.274722	1	1	7.65153e-30	3	marcksl1b
bmp16.3	1.70328e-33	0.963884	0.988	0.902	4.30402e-29	3	bmp16
exoc3l2b.1	3.10455e-33	1.63139	0.84	0.536	7.84489e-29	3	exoc3l2b
ndnf.2	1.32248e-32	1.16056	0.982	0.867	3.34178e-28	3	ndnf
cd81b.2	1.47661e-32	0.635897	0.994	0.948	3.73126e-28	3	cd81b
si:dkey-262g12.14	1.70982e-32	1.42067	0.331	0.048	4.32055e-28	3	si:dkey-262g12.14
dchs1b.1	5.00953e-31	1.49386	0.888	0.646	1.26586e-26	3	dchs1b
grb10a.2	1.26295e-30	0.586077	0.994	0.96	3.19135e-26	3	grb10a
fbln2.2	2.11864e-29	0.744907	1	0.954	5.35359e-25	3	fbln2
lrrc15.2	1.69225e-28	0.915666	0.97	0.757	4.27616e-24	3	lrrc15
bmpr1aa.2	1.32027e-27	1.0095	0.911	0.705	3.33619e-23	3	bmpr1aa
oaz2a.3	7.54037e-27	0.658147	0.982	0.965	1.90538e-22	3	oaz2a
plpp1a.3	5.50196e-26	0.652778	0.976	0.858	1.39029e-21	3	plpp1a
fkbp1ab.3	9.7443e-26	1.47642	0.675	0.339	2.46229e-21	3	fkbp1ab
slc18a2.2	2.0692e-25	2.14572	0.58	0.243	5.22867e-21	3	slc18a2
dlc.3	4.25717e-25	0.731818	0.964	0.923	1.07574e-20	3	dlc
kita.1	7.38824e-25	2.24626	0.568	0.244	1.86693e-20	3	kita
kdrl.3	9.25345e-25	0.402229	1	0.998	2.33825e-20	3	kdrl
tmem88b.3	1.44331e-24	0.599814	0.964	0.87	3.6471e-20	3	tmem88b
si:zfos-464b6.2.2	3.7998e-24	0.670579	0.959	0.901	9.60172e-20	3	si:zfos-464b6.2
apoa1b.2	3.85358e-23	1.27829	0.793	0.537	9.73761e-19	3	apoa1b
flt1.3	4.21462e-23	0.603376	0.988	0.939	1.06499e-18	3	flt1
hsd3b7.3	6.07107e-23	0.585855	1	0.946	1.5341e-18	3	hsd3b7
dll4.2	9.06221e-23	0.568103	1	0.976	2.28993e-18	3	dll4
lmo4a.2	3.14405e-22	0.661903	0.988	0.85	7.94471e-18	3	lmo4a
alpl.3	1.62822e-21	0.721782	0.947	0.782	4.11435e-17	3	alpl
myh9a.1	1.79218e-21	1.70204	0.704	0.409	4.52867e-17	3	myh9a
srgn.2	2.27995e-21	0.316078	0.994	0.976	5.76121e-17	3	srgn
gata4.2	2.38758e-21	2.79489	0.361	0.106	6.03318e-17	3	gata4
sema3fb.1	2.93594e-21	1.45574	0.828	0.618	7.41883e-17	3	sema3fb
ca2.1	3.08509e-21	1.73745	0.615	0.306	7.79571e-17	3	ca2
taldo1.1	1.36856e-20	0.605956	0.941	0.864	3.4582e-16	3	taldo1
FAM53C.1	2.53296e-20	1.15176	0.556	0.227	6.40055e-16	3	FAM53C
aqp8a.1.3	2.69255e-20	0.607102	0.964	0.883	6.80379e-16	3	aqp8a.1
hlx1.3	2.76712e-20	0.522869	0.982	0.925	6.99223e-16	3	hlx1
acvr1l.2	3.89741e-20	1.00814	0.893	0.68	9.84837e-16	3	acvr1l
plpp2a.2	5.52016e-20	0.750028	0.911	0.752	1.39489e-15	3	plpp2a
emilin2a.3	6.3856e-20	1.16009	0.822	0.561	1.61358e-15	3	emilin2a
tnfrsfa.2	9.63669e-20	0.751332	0.923	0.797	2.43509e-15	3	tnfrsfa
rca2.2	1.36864e-19	0.564591	0.982	0.898	3.45842e-15	3	rca2.2
cpn1.1	1.46012e-19	0.243984	0.97	0.936	3.68958e-15	3	cpn1
adra1bb.2	1.80527e-19	2.19755	0.509	0.232	4.56173e-15	3	adra1bb
rhoua.1	3.20058e-19	1.59397	0.651	0.382	8.08754e-15	3	rhoua
fkbp1aa	3.94614e-19	0.180179	0.994	0.992	9.9715e-15	3	fkbp1aa
ppp1r3cb.2	8.75707e-19	1.70424	0.615	0.342	2.21282e-14	3	ppp1r3cb
apoa2.1	1.10847e-18	1.81208	0.521	0.24	2.801e-14	3	apoa2
kirrel3l.2	1.18919e-18	0.954841	0.899	0.73	3.00497e-14	3	kirrel3l
asic4b.1	3.10052e-18	2.42563	0.396	0.138	7.83471e-14	3	asic4b
insra.2	4.38214e-18	0.775217	0.959	0.846	1.10732e-13	3	insra
ecel1.1	4.41486e-18	3.0752	0.278	0.071	1.11559e-13	3	ecel1
hic1.2	5.94125e-18	1.21772	0.769	0.515	1.50129e-13	3	hic1
sc:d189.2	7.6081e-18	0.940105	0.834	0.625	1.92249e-13	3	sc:d189
casp6b.2	9.92732e-18	4.12947	0.101	0.005	2.50854e-13	3	casp6b.2
si:ch211-222l21.1.1	1.03928e-17	0.560217	0.947	0.891	2.62615e-13	3	si:ch211-222l21.1
angptl4.2	2.06454e-17	0.741736	0.947	0.838	5.2169e-13	3	angptl4
cdh5.3	1.3636e-16	0.486468	1	0.971	3.44567e-12	3	cdh5
snx9a.1	3.37125e-16	1.08914	0.769	0.589	8.51881e-12	3	snx9a
si:ch211-145b13.6.2	6.6538e-16	0.424088	0.982	0.905	1.68135e-11	3	si:ch211-145b13.6
lyve1a.1	7.90964e-16	0.623625	0.959	0.904	1.99869e-11	3	lyve1a
rpz5.2	1.02939e-15	0.911762	0.822	0.69	2.60117e-11	3	rpz5
si:ch211-287a12.9.1	1.19409e-15	0.786975	0.87	0.656	3.01734e-11	3	si:ch211-287a12.9
vamp5.2	1.35225e-15	0.566811	0.929	0.823	3.41701e-11	3	vamp5
zgc:64106.3	2.48471e-15	0.712513	0.929	0.726	6.27862e-11	3	zgc:64106
LRATD2.2	3.09429e-15	0.856025	0.834	0.615	7.81896e-11	3	LRATD2
adcy2b.3	6.47175e-15	0.61285	0.964	0.916	1.63535e-10	3	adcy2b
mcamb.3	1.12715e-14	0.618251	0.959	0.915	2.8482e-10	3	mcamb
zgc:172122.2	1.37261e-14	1.11872	0.645	0.383	3.46845e-10	3	zgc:172122
tie1.1	1.9911e-14	0.331242	1	0.988	5.03132e-10	3	tie1
si:ch73-334d15.2.2	2.41323e-14	0.752381	0.799	0.593	6.09799e-10	3	si:ch73-334d15.2
ccl38a.5.1	4.25689e-14	2.00863	0.284	0.09	1.07567e-09	3	ccl38a.5
ece1	4.37846e-14	0.616712	0.959	0.862	1.10639e-09	3	ece1
PAQR9.1	4.39777e-14	1.49589	0.757	0.576	1.11127e-09	3	PAQR9
gpm6ab.2	5.48359e-14	0.497617	0.964	0.855	1.38565e-09	3	gpm6ab
bpifcl	9.0352e-14	1.6613	0.515	0.28	2.28311e-09	3	bpifcl
stard13a.1	9.03606e-14	2.03332	0.45	0.224	2.28332e-09	3	stard13a
ccdc187.1	9.41196e-14	0.832685	0.805	0.581	2.37831e-09	3	ccdc187
dhh.1	9.90909e-14	1.23561	0.633	0.386	2.50393e-09	3	dhh
zgc:64189.1	1.95256e-13	2.21581	0.219	0.056	4.93393e-09	3	zgc:64189
ehd4.3	2.85394e-13	0.319896	0.994	0.986	7.21161e-09	3	ehd4
aldh2.2.1	2.87361e-13	1.00692	0.675	0.5	7.26133e-09	3	aldh2.2
esama.1	3.70573e-13	0.344889	0.982	0.958	9.36401e-09	3	esama
mb.1	3.74858e-13	2.34687	0.302	0.112	9.47229e-09	3	mb
qsox1.1	5.14799e-13	1.53886	0.586	0.357	1.30085e-08	3	qsox1
mlnl.1	5.24472e-13	2.78166	0.154	0.029	1.32529e-08	3	mlnl
ivns1abpa	5.42287e-13	1.68321	0.473	0.25	1.3703e-08	3	ivns1abpa
ccnd1.3	5.64149e-13	0.621123	0.935	0.812	1.42555e-08	3	ccnd1
id2b.3	7.93087e-13	0.951978	0.71	0.489	2.00405e-08	3	id2b
mgll.3	7.94113e-13	0.872087	0.834	0.633	2.00664e-08	3	mgll
cited4b.1	1.29206e-12	0.644392	0.864	0.804	3.2649e-08	3	cited4b
notchl.3	1.44684e-12	0.350924	0.994	0.983	3.65602e-08	3	notchl
pfkfb2a.1	1.47927e-12	1.12455	0.207	0.051	3.73797e-08	3	pfkfb2a
col4a1.2	1.86739e-12	0.518942	0.976	0.95	4.71871e-08	3	col4a1
afap1l1b.2	1.97831e-12	0.451451	0.982	0.944	4.999e-08	3	afap1l1b
igfbp3.2	3.19024e-12	0.796658	0.888	0.739	8.06142e-08	3	igfbp3
rtn1b.2	4.20405e-12	1.32464	0.639	0.406	1.06232e-07	3	rtn1b
fam174b.2	5.79313e-12	0.273321	0.982	0.982	1.46387e-07	3	fam174b
sec22c	6.54457e-12	4.2134	0.077	0.006	1.65375e-07	3	sec22c
amigo3.1	7.92685e-12	1.70793	0.414	0.202	2.00304e-07	3	amigo3
bambia.3	8.36756e-12	0.462722	0.976	0.929	2.1144e-07	3	bambia
spry4.2	1.11135e-11	0.56349	0.935	0.917	2.80827e-07	3	spry4
frmd4bb.2	1.16781e-11	1.98775	0.355	0.157	2.95094e-07	3	frmd4bb
edn2.1	1.37043e-11	1.35467	0.598	0.366	3.46295e-07	3	edn2
pip5k1ba.1	1.56199e-11	2.54056	0.29	0.114	3.94698e-07	3	pip5k1ba
angpt2a.3	1.61817e-11	0.690043	0.876	0.729	4.08896e-07	3	angpt2a
pmp22b.2	1.77549e-11	0.229165	1	0.999	4.48647e-07	3	pmp22b
entpd1.2	1.82919e-11	0.399308	0.953	0.939	4.62218e-07	3	entpd1
aldh2.1.1	1.96128e-11	0.998917	0.55	0.308	4.95597e-07	3	aldh2.1
eva1ba.1	1.97491e-11	0.5772	0.858	0.733	4.99041e-07	3	eva1ba
trib3.2	2.54068e-11	0.494898	0.935	0.889	6.42006e-07	3	trib3
pdlim1.2	2.58768e-11	0.396115	0.941	0.914	6.5388e-07	3	pdlim1
si:ch211-119e14.1.2	2.69955e-11	2.02669	0.337	0.146	6.82149e-07	3	si:ch211-119e14.1
igf2b.2	2.80619e-11	0.872487	0.805	0.629	7.09096e-07	3	igf2b
mcu.2	3.01749e-11	0.945557	0.698	0.519	7.6249e-07	3	mcu
hoxb5a	3.1049e-11	1.53669	0.491	0.275	7.84576e-07	3	hoxb5a
aplnrb.3	6.22998e-11	0.350043	0.982	0.967	1.57425e-06	3	aplnrb
apc.2	8.60324e-11	0.531558	0.964	0.931	2.17395e-06	3	apc
g6pcb	1.07415e-10	3.43599	0.047	0.001	2.71428e-06	3	g6pcb
entpd8.3	1.08547e-10	0.792198	0.787	0.581	2.74288e-06	3	entpd8
ccl38.6.1	1.22462e-10	1.47441	0.432	0.251	3.09448e-06	3	ccl38.6
zgc:171686.2	1.67217e-10	0.862615	0.74	0.533	4.22542e-06	3	zgc:171686
sema6d.2	1.69246e-10	0.598165	0.941	0.833	4.27668e-06	3	sema6d
si:dkey-261h17.1.2	1.7322e-10	0.210778	1	0.998	4.37709e-06	3	si:dkey-261h17.1
fetub	1.74668e-10	1.75116	0.426	0.22	4.41369e-06	3	fetub
si:ch211-195o20.7.3	2.24693e-10	0.999982	0.609	0.361	5.67777e-06	3	si:ch211-195o20.7
col4a2.2	2.50953e-10	0.57714	0.935	0.831	6.34132e-06	3	col4a2
ldb2a.3	2.63626e-10	0.468451	0.97	0.934	6.66155e-06	3	ldb2a
sh3gl3b.2	7.53948e-10	0.467598	0.923	0.834	1.90515e-05	3	sh3gl3b
sh3bgrl3.1	1.02772e-09	0.528424	0.905	0.814	2.59693e-05	3	sh3bgrl3
nr1h5.1	1.40781e-09	2.22917	0.29	0.128	3.5574e-05	3	nr1h5
CR936977.2.1	1.82988e-09	1.52891	0.396	0.209	4.62391e-05	3	CR936977.2
slc44a2.2	1.92999e-09	0.349854	0.982	0.969	4.8769e-05	3	slc44a2
txndc5.1	1.95926e-09	0.696519	0.876	0.718	4.95086e-05	3	txndc5
fnbp1b.2	2.08338e-09	1.05709	0.438	0.237	5.2645e-05	3	fnbp1b
sh3bp4.2	2.10227e-09	0.810751	0.746	0.567	5.31222e-05	3	sh3bp4
etv2.2	2.3066e-09	0.25315	0.982	0.983	5.82855e-05	3	etv2
tns2a	3.24043e-09	0.749742	0.822	0.734	8.18823e-05	3	tns2a
si:ch211-57n23.1.2	3.29724e-09	1.51519	0.379	0.197	8.3318e-05	3	si:ch211-57n23.1
sult1st1.2	3.63266e-09	0.665401	0.822	0.639	9.17938e-05	3	sult1st1
sema3ab.2	3.82543e-09	0.41367	0.964	0.935	9.66648e-05	3	sema3ab
postna.2	4.10231e-09	0.560697	0.899	0.784	0.000103661	3	postna
anks1b.2	4.7018e-09	0.402295	1	0.943	0.00011881	3	anks1b
shisa9b	5.91826e-09	3.12174	0.16	0.047	0.000149549	3	shisa9b
adm2a.1	6.22025e-09	2.35578	0.302	0.143	0.00015718	3	adm2a
dusp6	6.65603e-09	0.308769	0.976	0.942	0.000168191	3	dusp6
slc35f1.1	7.59461e-09	2.51176	0.201	0.071	0.000191908	3	slc35f1
rin2.2	9.82306e-09	0.978017	0.692	0.541	0.000248219	3	rin2
pkp3b.2	1.05342e-08	0.459081	0.953	0.914	0.000266189	3	pkp3b
ankef1b.1	1.07714e-08	2.28227	0.172	0.054	0.000272183	3	ankef1b
hmgn2.1	1.09444e-08	0.236501	0.994	0.977	0.000276555	3	hmgn2
reep6	1.26105e-08	2.12396	0.071	0.009	0.000318653	3	reep6
tsc22d1.1	1.34037e-08	0.942098	0.68	0.52	0.000338698	3	tsc22d1
pde3a	1.79114e-08	2.62302	0.189	0.066	0.000452604	3	pde3a
epas1b.2	1.81144e-08	0.470052	0.941	0.867	0.000457734	3	epas1b
mylk5.2	1.8882e-08	0.510475	0.923	0.849	0.00047713	3	mylk5
si:ch211-214p13.3.1	2.17841e-08	3.38778	0.089	0.016	0.000550461	3	si:ch211-214p13.3
p2rx1.1	2.20836e-08	1.58319	0.302	0.136	0.000558031	3	p2rx1
stum.1	2.22475e-08	2.88385	0.118	0.028	0.000562172	3	stum
tspan14.3	2.48542e-08	0.277913	0.953	0.939	0.000628041	3	tspan14
bmp6.3	3.04829e-08	0.898001	0.633	0.435	0.000770273	3	bmp6
ampd3b.1	3.0702e-08	1.96334	0.343	0.183	0.000775809	3	ampd3b
spred2a.1	3.41603e-08	1.26695	0.538	0.358	0.000863198	3	spred2a
abtb2b.1	3.62884e-08	1.65457	0.385	0.211	0.000916972	3	abtb2b
ppp1r14ba.1	3.78059e-08	0.991202	0.515	0.335	0.000955318	3	ppp1r14ba
rogdi.1	5.04051e-08	1.26753	0.414	0.238	0.00127369	3	rogdi
gata6.1	5.82316e-08	1.05124	0.284	0.125	0.00147145	3	gata6
pcdh12.2	6.07984e-08	0.273093	1	0.985	0.00153631	3	pcdh12
si:dkey-151g10.3	6.32907e-08	0.957905	0.592	0.421	0.00159929	3	si:dkey-151g10.3
tmem26a	6.46935e-08	1.17123	0.462	0.293	0.00163474	3	tmem26a
zgc:173552	6.49747e-08	3.08165	0.053	0.005	0.00164185	3	zgc:173552
pora	6.64769e-08	0.457407	0.935	0.892	0.00167981	3	pora
pcdh17.3	6.65469e-08	0.48267	0.959	0.92	0.00168157	3	pcdh17
ralgapa1.2	6.69657e-08	0.459327	0.947	0.802	0.00169216	3	ralgapa1
FP325130.1.1	7.96993e-08	1.16815	0.426	0.256	0.00201392	3	FP325130.1
neurl1aa.1	8.2477e-08	1.24774	0.485	0.307	0.00208411	3	neurl1aa
nid1b.3	9.04109e-08	0.444287	0.959	0.914	0.00228459	3	nid1b
lrrc8c.1	1.00061e-07	0.6078	0.811	0.721	0.00252844	3	lrrc8c
dlc1	1.05782e-07	0.724733	0.799	0.667	0.00267299	3	dlc1
si:ch211-194e15.5.1	1.28549e-07	1.93882	0.302	0.153	0.00324831	3	si:ch211-194e15.5
plk1	1.35847e-07	0.717391	0.663	0.478	0.00343272	3	plk1
hdac9b.1	1.46173e-07	0.789703	0.722	0.577	0.00369365	3	hdac9b
ano5b.1	1.82318e-07	0.689592	0.834	0.701	0.004607	3	ano5b
tspan4b.2	2.19076e-07	0.217492	0.988	0.969	0.00553582	3	tspan4b
ppp2r2ca:1.1	2.30227e-07	1.22869	0.16	0.053	0.0058176	3	ppp2r2ca:1
fgd5b.1	2.37547e-07	1.27258	0.325	0.165	0.00600256	3	fgd5b
actn2b	2.51217e-07	3.14229	0.13	0.039	0.00634801	3	actn2b
prc1b.1	2.54362e-07	1.37299	0.314	0.156	0.00642748	3	prc1b
rnd1a	2.60105e-07	0.804893	0.686	0.557	0.0065726	3	rnd1a
F2R.1	2.61645e-07	0.532674	0.811	0.665	0.00661151	3	F2R
mdka.2	2.9005e-07	0.525338	0.805	0.661	0.00732927	3	mdka
CU927890.1.2	3.00088e-07	0.298135	0.994	0.946	0.00758294	3	CU927890.1
nrros	3.07401e-07	0.832836	0.692	0.617	0.00776771	3	nrros
tsc22d3	3.23545e-07	0.318217	0.982	0.927	0.00817565	3	tsc22d3
sgsm3.2	3.67019e-07	1.09601	0.42	0.243	0.0092742	3	sgsm3
pcolceb	4.06733e-07	2.09122	0.249	0.115	0.0102777	3	pcolceb
nr2f1a.3	4.1643e-07	0.419127	0.964	0.81	0.0105228	3	nr2f1a
CABZ01032488.1.3	4.7448e-07	0.376452	0.917	0.775	0.0119896	3	CABZ01032488.1
ston2	4.88868e-07	1.48898	0.266	0.125	0.0123532	3	ston2
calcrla.2	5.30958e-07	0.4935	0.84	0.69	0.0134168	3	calcrla
lamb1a.2	5.52989e-07	0.42841	0.917	0.805	0.0139735	3	lamb1a
ogfrl1.1	6.07378e-07	2.31621	0.201	0.086	0.0153478	3	ogfrl1
hif1ab.1	6.99113e-07	0.309647	0.994	0.964	0.0176659	3	hif1ab
f8.1	7.32232e-07	1.37084	0.391	0.227	0.0185028	3	f8
si:dkey-148d16.5	7.90609e-07	6.36214	0.024	0	0.0199779	3	si:dkey-148d16.5
ugt5b5	7.9213e-07	1.22698	0.29	0.146	0.0200163	3	ugt5b5
tmbim1a.1	9.76621e-07	1.60941	0.278	0.137	0.0246782	3	tmbim1a
npc1.1	1.03121e-06	0.52802	0.858	0.764	0.0260578	3	npc1
knstrn	1.06768e-06	2.19394	0.107	0.028	0.0269791	3	knstrn
RAB19	1.08735e-06	4.1355	0.03	0.001	0.0274762	3	RAB19
tm4sf18.2	1.20038e-06	0.256569	0.988	0.969	0.0303324	3	tm4sf18
pabpc4.1	1.28121e-06	1.3361	0.284	0.14	0.0323748	3	pabpc4
ctnna2.1	1.30517e-06	1.95956	0.249	0.121	0.0329803	3	ctnna2
elmo1.2	1.33685e-06	0.309119	0.953	0.914	0.033781	3	elmo1
fabp11a.2	1.42538e-06	0.141268	1	0.994	0.0360179	3	fabp11a
zgc:162344	1.44651e-06	1.37002	0.219	0.093	0.0365518	3	zgc:162344
zfpm1.2	1.49002e-06	0.992913	0.509	0.35	0.0376514	3	zfpm1
edn1.3	1.5012e-06	0.483162	0.805	0.595	0.0379338	3	edn1
itgb1a	1.56712e-06	1.05496	0.556	0.411	0.0395996	3	itgb1a
grapa.1	1.62073e-06	0.383265	0.888	0.812	0.0409541	3	grapa
CT583642.1	1.83534e-06	1.34051	0.089	0.02	0.0463772	3	CT583642.1
si:ch211-242b18.1.1	2.13464e-06	1.4578	0.402	0.255	0.0539402	3	si:ch211-242b18.1
LO017829.1	2.18563e-06	2.87515	0.041	0.004	0.0552286	3	LO017829.1
wscd2	2.19512e-06	1.36147	0.355	0.204	0.0554685	3	wscd2
myo3b	2.23925e-06	2.68193	0.148	0.054	0.0565835	3	myo3b
si:dkey-32e6.6	2.29791e-06	2.39063	0.041	0.004	0.0580658	3	si:dkey-32e6.6
mtss1.1	2.42132e-06	0.8555	0.604	0.453	0.0611843	3	mtss1
itgb5	2.81901e-06	0.985947	0.538	0.38	0.0712335	3	itgb5
si:dkeyp-23e4.3.2	3.00916e-06	0.512502	0.769	0.56	0.0760385	3	si:dkeyp-23e4.3
rcan1a.2	3.07246e-06	0.440288	0.888	0.773	0.077638	3	rcan1a
txnrd3	3.21428e-06	0.351768	0.953	0.916	0.0812217	3	txnrd3
ccna2.2	3.23877e-06	0.958852	0.533	0.355	0.0818406	3	ccna2
rims2b	3.72055e-06	2.16132	0.166	0.065	0.0940145	3	rims2b
si:dkeyp-27e10.3	3.72885e-06	1.27059	0.361	0.211	0.0942243	3	si:dkeyp-27e10.3
hspg2.3	3.83669e-06	0.472005	0.923	0.854	0.0969493	3	hspg2
slco1c1.3	1.37502e-31	1.87844	0.851	0.502	3.47454e-27	4	slco1c1
slco1d1.2	2.92564e-31	1.65172	0.936	0.697	7.39279e-27	4	slco1d1
si:dkeyp-73d8.8.3	6.57209e-31	2.63918	0.479	0.086	1.6607e-26	4	si:dkeyp-73d8.8
abcc2.2	1.32812e-30	1.54836	0.915	0.689	3.35603e-26	4	abcc2
sox7.3	3.1149e-30	0.757938	1	0.96	7.87103e-26	4	sox7
gstp1.3	1.38375e-29	1.16599	0.936	0.762	3.4966e-25	4	gstp1
cldn5a	3.20254e-28	1.67057	0.894	0.6	8.09249e-24	4	cldn5a
FQ311908.1.1	5.0045e-28	1.65444	0.883	0.544	1.26459e-23	4	FQ311908.1
lef1.3	9.37889e-28	1.99837	0.84	0.467	2.36995e-23	4	lef1
slc7a5.3	2.8941e-26	1.61176	0.894	0.656	7.31311e-22	4	slc7a5
si:dkeyp-73d8.6.3	6.41438e-26	2.67074	0.426	0.083	1.62085e-21	4	si:dkeyp-73d8.6
si:dkey-19b23.8.3	3.79388e-24	0.892082	0.989	0.884	9.58675e-20	4	si:dkey-19b23.8
si:dkeyp-73d8.9.3	9.75708e-24	2.64147	0.351	0.058	2.46552e-19	4	si:dkeyp-73d8.9
zgc:158423.3	3.95153e-23	1.29319	0.894	0.657	9.98512e-19	4	zgc:158423
abcb4.2	6.14289e-23	1.22584	0.926	0.76	1.55225e-18	4	abcb4
SLC16A7.3	7.85613e-23	1.39425	0.862	0.625	1.98517e-18	4	SLC16A7
slc47a4.2	8.34046e-23	2.3541	0.723	0.333	2.10755e-18	4	slc47a4
csrp2.2	3.99191e-22	1.44382	0.862	0.549	1.00872e-17	4	csrp2
MYO1D.3	7.99654e-22	2.57734	0.564	0.179	2.02065e-17	4	MYO1D
pvrl2l.1	1.46796e-21	2.23191	0.628	0.255	3.7094e-17	4	pvrl2l
krt18a.1.3	2.27296e-21	0.264902	1	1	5.74355e-17	4	krt18a.1
crip3.2	3.48968e-21	1.65831	0.787	0.453	8.81808e-17	4	crip3
jam2a.3	2.10114e-20	0.421708	1	0.977	5.30938e-16	4	jam2a
slc38a3a.4	2.50139e-20	1.67281	0.819	0.533	6.32075e-16	4	slc38a3a
ftr82.3	5.81745e-20	0.86748	0.968	0.833	1.47001e-15	4	ftr82
slc7a3a.3	1.06763e-19	1.49814	0.883	0.698	2.69778e-15	4	slc7a3a
mob2b.2	3.57874e-19	0.896858	0.979	0.838	9.04311e-15	4	mob2b
CABZ01076275.1.3	4.48087e-19	1.35992	0.904	0.668	1.13227e-14	4	CABZ01076275.1
krt94.2	1.26488e-18	0.68638	0.989	0.886	3.19623e-14	4	krt94
hopx.4	1.52868e-18	0.595349	0.989	0.913	3.86282e-14	4	hopx
jag2b.4	1.9047e-18	0.809577	1	0.929	4.81299e-14	4	jag2b
fabp11a.3	2.2839e-18	0.382823	1	0.995	5.77118e-14	4	fabp11a
rbpms2b.2	3.95106e-18	0.86792	0.947	0.757	9.98393e-14	4	rbpms2b
frya.2	4.63049e-18	2.30523	0.617	0.254	1.17008e-13	4	frya
slc2a1a.3	1.18502e-17	1.51653	0.787	0.474	2.99444e-13	4	slc2a1a
spock3.2	1.33039e-17	1.25922	0.872	0.58	3.36177e-13	4	spock3
FADS6.2	4.97926e-17	3.16933	0.33	0.077	1.25821e-12	4	FADS6
clec14a.3	6.50577e-17	0.431603	1	0.979	1.64394e-12	4	clec14a
il15.2	8.81734e-17	1.50555	0.723	0.386	2.22805e-12	4	il15
epas1b.3	9.68035e-17	0.853245	0.989	0.868	2.44613e-12	4	epas1b
abcg2a.3	1.84647e-16	0.574647	0.968	0.965	4.66583e-12	4	abcg2a
id1.3	2.32489e-16	0.343972	1	0.976	5.87475e-12	4	id1
ca16b.4	7.76459e-16	0.826995	0.979	0.899	1.96204e-11	4	ca16b
bsg.2	1.08737e-15	1.28443	0.84	0.546	2.74769e-11	4	bsg
krt8.2	1.52129e-15	0.192139	1	1	3.84416e-11	4	krt8
gpd1b.2	1.78342e-15	2.02231	0.638	0.335	4.50652e-11	4	gpd1b
lpl.4	2.63379e-15	0.73823	0.979	0.935	6.65532e-11	4	lpl
si:ch211-263k4.2:1	2.66367e-15	3.80801	0.138	0.013	6.73082e-11	4	si:ch211-263k4.2:1
gstp2.2	3.64286e-15	2.64355	0.223	0.037	9.20515e-11	4	gstp2
krt93.3	4.02811e-15	1.49478	0.585	0.222	1.01786e-10	4	krt93
f2rl2.2	6.11582e-15	1.21711	0.83	0.668	1.54541e-10	4	f2rl2
slc31a1.2	1.24498e-14	1.59534	0.745	0.422	3.14594e-10	4	slc31a1
timp4.1.3	1.32404e-14	1.55401	0.734	0.432	3.34573e-10	4	timp4.1
id3.2	1.35588e-14	0.893547	0.915	0.684	3.42617e-10	4	id3
gpm6ab.3	1.44843e-14	0.603056	0.968	0.862	3.66004e-10	4	gpm6ab
podxl.3	1.46214e-14	0.445128	1	0.994	3.69468e-10	4	podxl
acvrl1.2	1.63775e-14	0.609736	0.989	0.912	4.13843e-10	4	acvrl1
ptprb.2	1.91988e-14	0.542887	1	0.959	4.85135e-10	4	ptprb
scarb2a.3	3.61127e-14	0.51915	0.989	0.978	9.12533e-10	4	scarb2a
adap2.1	5.33971e-14	1.80205	0.606	0.296	1.34929e-09	4	adap2
slco4a1.3	5.59426e-14	2.4387	0.543	0.253	1.41361e-09	4	slco4a1
kcnn1a.1	6.64124e-14	2.01088	0.585	0.278	1.67818e-09	4	kcnn1a
si:dkey-23a13.2.3	9.52083e-14	1.95514	0.574	0.268	2.40582e-09	4	si:dkey-23a13.2
ttyh2l.3	1.13229e-13	1.98291	0.617	0.303	2.86119e-09	4	ttyh2l
si:dkey-126g1.9.3	2.23238e-13	0.731678	0.904	0.735	5.64099e-09	4	si:dkey-126g1.9
cyp2aa12.2	4.41886e-13	1.92808	0.415	0.147	1.1166e-08	4	cyp2aa12
gata2a.1	5.8341e-13	0.884186	0.926	0.782	1.47422e-08	4	gata2a
fxyd1.4	6.20239e-13	0.780158	0.904	0.716	1.56728e-08	4	fxyd1
si:dkey-31f5.11.3	7.31619e-13	1.5202	0.766	0.451	1.84873e-08	4	si:dkey-31f5.11
icn.1	7.77993e-13	1.54628	0.574	0.287	1.96591e-08	4	icn
atp11c	8.68502e-13	1.44479	0.723	0.402	2.19462e-08	4	atp11c
abcb11a.1	1.01014e-12	3.02931	0.394	0.139	2.55253e-08	4	abcb11a
epas1a.3	1.20971e-12	0.749914	0.979	0.833	3.05682e-08	4	epas1a
abhd2a.1	1.27659e-12	0.740433	0.894	0.783	3.22581e-08	4	abhd2a
si:ch211-156j16.1.4	1.68198e-12	0.283401	1	0.998	4.25019e-08	4	si:ch211-156j16.1
efemp2b.2	2.10858e-12	1.03515	0.926	0.663	5.32816e-08	4	efemp2b
edn1.4	4.62593e-12	0.978098	0.851	0.606	1.16893e-07	4	edn1
si:dkey-56m19.5.2	5.755e-12	0.847286	0.947	0.73	1.45423e-07	4	si:dkey-56m19.5
plekhg5a.2	6.58532e-12	0.564203	1	0.959	1.66404e-07	4	plekhg5a
cd82b.2	8.28717e-12	0.747755	0.936	0.811	2.09408e-07	4	cd82b
tnfsf10l.2	8.60105e-12	1.22979	0.787	0.543	2.1734e-07	4	tnfsf10l
cxcl12b.3	1.2075e-11	1.15036	0.851	0.587	3.05123e-07	4	cxcl12b
zic2a.1	1.24539e-11	1.08289	0.883	0.687	3.14697e-07	4	zic2a
fam169aa.2	1.3068e-11	2.07344	0.543	0.291	3.30216e-07	4	fam169aa
cyp2aa4.2	1.6945e-11	2.03059	0.33	0.103	4.28183e-07	4	cyp2aa4
zgc:194398.1	1.97049e-11	2.90778	0.319	0.102	4.97922e-07	4	zgc:194398
bmp1b.2	2.01316e-11	2.05264	0.5	0.218	5.08706e-07	4	bmp1b
crip2.3	2.10709e-11	0.414166	1	0.973	5.32441e-07	4	crip2
slc16a1a.3	2.51499e-11	1.325	0.766	0.519	6.35512e-07	4	slc16a1a
cyp2aa11.2	2.51536e-11	1.94794	0.426	0.18	6.35605e-07	4	cyp2aa11
lpar6a.2	3.53494e-11	1.0352	0.809	0.583	8.93243e-07	4	lpar6a
si:ch73-106l15.2	4.01616e-11	4.17855	0.085	0.006	1.01484e-06	4	si:ch73-106l15.2
ahr2.1	4.16829e-11	0.436752	1	0.983	1.05329e-06	4	ahr2
gpr146.1	4.61728e-11	1.38065	0.691	0.407	1.16674e-06	4	gpr146
cd99.4	4.98343e-11	0.882512	0.862	0.627	1.25926e-06	4	cd99
pdgfbb.4	5.3149e-11	0.844406	0.915	0.852	1.34302e-06	4	pdgfbb
abcc4.1	6.15621e-11	1.72424	0.628	0.374	1.55561e-06	4	abcc4
lmo7a.2	7.06549e-11	1.30474	0.649	0.372	1.78538e-06	4	lmo7a
cxcr4b.1	7.21552e-11	1.65587	0.66	0.424	1.82329e-06	4	cxcr4b
tuft1a.3	8.28849e-11	1.03531	0.862	0.617	2.09442e-06	4	tuft1a
qki2.3	8.4554e-11	0.882472	0.851	0.61	2.1366e-06	4	qki2
gulp1b.2	8.57096e-11	1.12016	0.702	0.398	2.1658e-06	4	gulp1b
ptmab.1	9.14152e-11	0.284901	1	0.975	2.30997e-06	4	ptmab
foxc1a.2	1.08467e-10	1.03697	0.851	0.677	2.74086e-06	4	foxc1a
usp43a.1	1.13244e-10	3.01619	0.277	0.083	2.86158e-06	4	usp43a
tnfrsf9a.3	1.44555e-10	1.60413	0.543	0.279	3.65277e-06	4	tnfrsf9a
kank1a.2	1.75376e-10	1.78149	0.606	0.354	4.43159e-06	4	kank1a
gcna.2	1.78154e-10	1.46262	0.394	0.145	4.50178e-06	4	gcna
hnmt.2	1.78954e-10	2.48656	0.309	0.102	4.52198e-06	4	hnmt
cyp2aa3.2	2.45108e-10	2.17168	0.255	0.071	6.19364e-06	4	cyp2aa3
adgrl1a.2	2.60804e-10	2.4061	0.457	0.205	6.59025e-06	4	adgrl1a
oplah.3	2.67647e-10	1.62059	0.681	0.445	6.76317e-06	4	oplah
mylipb.3	3.54464e-10	0.767262	0.915	0.77	8.95694e-06	4	mylipb
lrrn1.3	4.32486e-10	1.23141	0.809	0.621	1.09285e-05	4	lrrn1
cfd.2	5.61217e-10	0.804596	0.894	0.808	1.41814e-05	4	cfd
CU459155.1	6.37125e-10	3.61063	0.074	0.005	1.60995e-05	4	CU459155.1
tmbim1b.1	6.87795e-10	1.30087	0.617	0.335	1.73799e-05	4	tmbim1b
CU694264.1	7.11755e-10	2.31322	0.202	0.047	1.79853e-05	4	CU694264.1
eppk1.3	7.1713e-10	0.929583	0.915	0.682	1.81212e-05	4	eppk1
si:ch73-368j24.17	7.35684e-10	3.82045	0.064	0.004	1.859e-05	4	si:ch73-368j24.17
elovl5.2	8.88131e-10	1.86828	0.479	0.235	2.24422e-05	4	elovl5
limch1b.3	1.066e-09	0.459599	1	0.964	2.69367e-05	4	limch1b
si:ch211-220f21.3	1.0842e-09	3.83378	0.106	0.014	2.73968e-05	4	si:ch211-220f21.3
si:ch211-212g7.6.3	1.13245e-09	0.794788	0.926	0.673	2.86158e-05	4	si:ch211-212g7.6
flt1.4	1.91239e-09	0.481263	0.979	0.943	4.83242e-05	4	flt1
fblim1.1	2.13377e-09	0.659011	0.926	0.789	5.39183e-05	4	fblim1
hspa12b.2	2.58091e-09	0.559258	0.989	0.843	6.5217e-05	4	hspa12b
sox13.1	2.7221e-09	1.07435	0.83	0.643	6.87848e-05	4	sox13
zgc:153184.1	2.79235e-09	1.70039	0.415	0.184	7.056e-05	4	zgc:153184
fbp2	2.91517e-09	6.31113	0.032	0	7.36635e-05	4	fbp2
frem1b.2	2.99275e-09	1.31644	0.755	0.537	7.56237e-05	4	frem1b
galnt18b.2	3.4338e-09	1.232	0.67	0.401	8.67688e-05	4	galnt18b
slc38a5b.2	4.02063e-09	0.669958	0.936	0.833	0.000101597	4	slc38a5b
ugt1a1.2	4.13675e-09	1.00457	0.734	0.461	0.000104532	4	ugt1a1
CABZ01067151.1.3	5.40599e-09	0.960127	0.723	0.505	0.000136604	4	CABZ01067151.1
apof.2	5.5073e-09	2.19648	0.426	0.2	0.000139164	4	apof
cyp2p6.2	6.02804e-09	0.938193	0.745	0.427	0.000152323	4	cyp2p6
tox	6.9768e-09	2.06032	0.362	0.149	0.000176297	4	tox
dcp2.1	7.78157e-09	1.06513	0.606	0.314	0.000196633	4	dcp2
anxa13l.3	9.42008e-09	1.22429	0.543	0.28	0.000238036	4	anxa13l
timp4.2.2	1.24353e-08	2.7492	0.106	0.015	0.000314227	4	timp4.2
baiap2b:1.2	1.26262e-08	1.55167	0.309	0.108	0.00031905	4	baiap2b:1
cx34.4	1.39754e-08	3.07746	0.117	0.019	0.000353144	4	cx34.4
serinc5.2	1.51013e-08	0.734415	0.926	0.839	0.000381594	4	serinc5
pecam1.3	1.5119e-08	0.36824	1	0.998	0.000382041	4	pecam1
btbd3b	1.61193e-08	4.01075	0.106	0.016	0.000407319	4	btbd3b
bcl2l10.3	2.01064e-08	0.967071	0.734	0.527	0.000508067	4	bcl2l10
pparg	2.13352e-08	1.67716	0.319	0.117	0.000539118	4	pparg
ca5a	2.16009e-08	1.66811	0.351	0.144	0.000545833	4	ca5a
ubald1a	2.51145e-08	1.19291	0.574	0.317	0.000634619	4	ubald1a
rgs3a.3	2.82123e-08	0.564431	0.915	0.85	0.000712897	4	rgs3a
fzd5	2.86618e-08	3.20195	0.117	0.02	0.000724256	4	fzd5
gdpd2.2	2.88334e-08	2.39389	0.404	0.201	0.00072859	4	gdpd2
fli1a.3	2.9518e-08	0.200782	1	0.999	0.00074589	4	fli1a
cyp2aa7.2	3.07137e-08	1.22923	0.585	0.352	0.000776105	4	cyp2aa7
sgk1.2	3.22539e-08	0.316177	1	0.984	0.000815023	4	sgk1
klf2a.2	3.28141e-08	0.3539	1	0.965	0.000829179	4	klf2a
cyp2aa9.2	3.35342e-08	2.48361	0.17	0.042	0.000847375	4	cyp2aa9
dspa.2	4.37099e-08	0.900351	0.83	0.634	0.00110451	4	dspa
mmrn2a.3	4.53494e-08	0.421582	1	0.954	0.00114593	4	mmrn2a
cd302	5.41927e-08	1.69542	0.351	0.15	0.0013694	4	cd302
azin1a.2	5.51584e-08	1.33707	0.585	0.368	0.0013938	4	azin1a
she.2	5.66881e-08	0.689422	0.84	0.666	0.00143245	4	she
cttnbp2nlb	5.68158e-08	0.796614	0.787	0.597	0.00143568	4	cttnbp2nlb
wasf3b.2	5.91018e-08	0.255999	1	0.998	0.00149344	4	wasf3b
mef2aa	6.37404e-08	0.545986	0.904	0.833	0.00161065	4	mef2aa
sult2st1.3	6.58765e-08	0.985629	0.723	0.525	0.00166463	4	sult2st1
coro2bb.3	7.02227e-08	1.13829	0.606	0.383	0.00177446	4	coro2bb
cyp2ad3.3	7.26338e-08	0.514893	0.936	0.828	0.00183538	4	cyp2ad3
gclc.3	7.29474e-08	1.33689	0.617	0.382	0.00184331	4	gclc
msi2a.2	7.82883e-08	1.31964	0.585	0.368	0.00197827	4	msi2a
ptn	8.134e-08	1.25333	0.617	0.385	0.00205538	4	ptn
cyp2ad2.2	8.38173e-08	1.14599	0.596	0.338	0.00211798	4	cyp2ad2
elovl1b.3	8.52957e-08	0.559772	0.915	0.855	0.00215534	4	elovl1b
snx18a.3	9.12674e-08	0.822943	0.851	0.683	0.00230624	4	snx18a
si:dkey-165a24.9.1	1.00482e-07	1.89538	0.362	0.165	0.00253909	4	si:dkey-165a24.9
sult1st1.3	1.10978e-07	0.694283	0.851	0.649	0.00280431	4	sult1st1
fnbp1l.1	1.32039e-07	0.84438	0.755	0.519	0.0033365	4	fnbp1l
pip5k1bb.2	1.52079e-07	1.57501	0.468	0.25	0.00384288	4	pip5k1bb
lin7a.1	1.55621e-07	2.26703	0.383	0.185	0.0039324	4	lin7a
cast.1	1.79997e-07	0.596992	0.904	0.782	0.00454835	4	cast
hey2.1	1.84752e-07	2.32524	0.319	0.136	0.00466849	4	hey2
tns1b.2	1.89565e-07	0.424479	1	0.966	0.00479011	4	tns1b
slc9a3r1b.3	2.00758e-07	0.602816	0.883	0.695	0.00507297	4	slc9a3r1b
slc19a3a	2.10722e-07	2.1874	0.33	0.15	0.00532472	4	slc19a3a
cx35.4.1	2.10793e-07	1.8432	0.394	0.189	0.00532652	4	cx35.4
shroom4.3	2.17945e-07	0.574353	0.979	0.918	0.00550725	4	shroom4
smox.2	2.2004e-07	0.470093	0.915	0.896	0.0055602	4	smox
dusp1.2	2.25185e-07	0.316583	1	0.97	0.0056902	4	dusp1
tox2.4	2.43027e-07	0.682664	0.84	0.666	0.00614105	4	tox2
mknk2b.3	2.60134e-07	0.575694	0.947	0.851	0.00657333	4	mknk2b
nrp1a.2	2.99667e-07	0.712785	0.904	0.688	0.00757229	4	nrp1a
gata3.3	3.01176e-07	0.999076	0.66	0.422	0.00761042	4	gata3
iffo2a	3.0661e-07	2.70045	0.138	0.032	0.00774774	4	iffo2a
ptprr.2	3.15565e-07	1.68908	0.351	0.155	0.00797401	4	ptprr
tnrc18.1	3.43825e-07	0.865939	0.872	0.773	0.0086881	4	tnrc18
BX649300.2	3.61957e-07	3.58492	0.085	0.013	0.00914629	4	BX649300.2
slc2a1b.1	4.06854e-07	1.31858	0.564	0.325	0.0102808	4	slc2a1b
pxna.1	4.49586e-07	1.25206	0.596	0.4	0.0113606	4	pxna
dachd.2	4.63545e-07	0.974998	0.628	0.404	0.0117133	4	dachd
oaz2b.1	5.11963e-07	1.13739	0.564	0.358	0.0129368	4	oaz2b
efna1b.2	5.16051e-07	0.79815	0.787	0.584	0.0130401	4	efna1b
mmp25a.2	5.49804e-07	2.09994	0.33	0.149	0.013893	4	mmp25a
si:dkey-38p12.3.2	5.5903e-07	0.677838	0.883	0.691	0.0141261	4	si:dkey-38p12.3
slco5a1a.1	5.77949e-07	1.08226	0.691	0.519	0.0146042	4	slco5a1a
wu:fj16a03.1	6.7962e-07	1.95934	0.245	0.091	0.0171733	4	wu:fj16a03
itga1.3	7.76267e-07	0.725535	0.809	0.621	0.0196155	4	itga1
KIRREL3.1	7.85045e-07	2.36966	0.17	0.048	0.0198373	4	KIRREL3
ptbp1a.2	8.48555e-07	0.695127	0.851	0.721	0.0214421	4	ptbp1a
zgc:101716	8.84702e-07	2.03195	0.16	0.043	0.0223555	4	zgc:101716
slco2a1.3	9.21606e-07	1.17287	0.617	0.409	0.0232881	4	slco2a1
fzd10.3	9.91632e-07	1.88805	0.383	0.185	0.0250575	4	fzd10
gjd2b	1.09055e-06	2.40763	0.064	0.007	0.0275572	4	gjd2b
si:ch211-165f21.7	1.0993e-06	4.84342	0.043	0.003	0.0277782	4	si:ch211-165f21.7
tbx3a.2	1.17535e-06	1.21324	0.702	0.507	0.0297	4	tbx3a
epcam.2	1.20474e-06	0.925683	0.457	0.225	0.0304426	4	epcam
zgc:154054	1.20906e-06	3.50955	0.043	0.003	0.0305518	4	zgc:154054
perp.3	1.21695e-06	0.288804	0.989	0.985	0.030751	4	perp
si:ch211-229d2.5	1.27113e-06	5.72807	0.021	0	0.0321203	4	si:ch211-229d2.5
si:ch211-67f24.7	1.27113e-06	5.48123	0.021	0	0.0321203	4	si:ch211-67f24.7
osm	1.27113e-06	5.85087	0.021	0	0.0321203	4	osm
mpped2a.1	1.28593e-06	1.73369	0.479	0.297	0.0324941	4	mpped2a
foxl2b.2	1.33644e-06	1.09642	0.521	0.293	0.0337706	4	foxl2b
sema7a.4	1.46615e-06	0.679205	0.83	0.626	0.0370482	4	sema7a
mtdha.2	1.53399e-06	0.635566	0.851	0.678	0.0387623	4	mtdha
sh3gl3a.1	1.53742e-06	1.00582	0.67	0.455	0.0388491	4	sh3gl3a
ptmaa.2	1.6921e-06	0.453127	0.947	0.816	0.0427576	4	ptmaa
amotl2a.2	1.7385e-06	0.384493	1	0.937	0.0439302	4	amotl2a
tefb.1	1.77723e-06	0.80735	0.691	0.466	0.0449088	4	tefb
mlip	1.84081e-06	2.69859	0.106	0.022	0.0465155	4	mlip
metrn.3	1.96915e-06	0.901882	0.755	0.568	0.0497585	4	metrn
myl9a.4	2.20618e-06	0.599083	0.819	0.639	0.0557479	4	myl9a
si:ch211-225h24.2.3	2.36203e-06	0.744977	0.702	0.49	0.0596862	4	si:ch211-225h24.2
arhgap17a.2	2.59399e-06	0.724602	0.702	0.445	0.0655476	4	arhgap17a
si:dkey-30h22.11	3.02178e-06	2.2969	0.085	0.015	0.0763573	4	si:dkey-30h22.11
baiap2b.2	3.40655e-06	1.02224	0.543	0.33	0.08608	4	baiap2b
cited4a.1	3.44323e-06	1.61757	0.457	0.267	0.087007	4	cited4a
bmpr1aa.3	3.54054e-06	0.586357	0.862	0.723	0.0894659	4	bmpr1aa
abcc12.1	3.63369e-06	2.0327	0.33	0.159	0.0918196	4	abcc12
sox17.2	3.68131e-06	1.27843	0.521	0.324	0.093023	4	sox17
rprd2a.2	3.73741e-06	0.891933	0.511	0.28	0.0944406	4	rprd2a
gpr182.4	2.06843e-32	0.611994	1	0.996	5.22672e-28	5	gpr182
plvapb.5	5.77699e-30	0.525199	1	1	1.45979e-25	5	plvapb
lyve1b.4	1.23146e-19	0.614529	1	0.973	3.11178e-15	5	lyve1b
igf2b.3	1.2588e-19	1.44014	0.941	0.637	3.18087e-15	5	igf2b
lfng.2	2.64233e-17	0.596811	1	0.962	6.6769e-13	5	lfng
krt8.3	6.58413e-17	0.22503	1	1	1.66374e-12	5	krt8
cyp2ad3.4	1.82414e-16	0.811177	0.956	0.829	4.60942e-12	5	cyp2ad3
thbs1b.2	4.19739e-16	1.54603	0.941	0.637	1.06064e-11	5	thbs1b
ackr3b.2	1.02046e-15	0.837023	0.971	0.928	2.57861e-11	5	ackr3b
ace.3	1.27327e-15	1.81515	0.868	0.574	3.21744e-11	5	ace
adra1d.3	1.05072e-14	1.87465	0.809	0.511	2.65505e-10	5	adra1d
fam174b.3	1.27001e-14	0.408809	1	0.981	3.20919e-10	5	fam174b
ugt1b5.1	1.34498e-14	0.95517	0.926	0.699	3.39863e-10	5	ugt1b5
sptlc2a.4	2.93126e-14	0.757398	0.971	0.872	7.407e-10	5	sptlc2a
sele.2	5.02235e-14	1.36054	0.926	0.668	1.2691e-09	5	sele
si:ch211-216b21.2	1.31264e-13	3.60903	0.118	0.008	3.31692e-09	5	si:ch211-216b21.2
tgm2b.3	5.03095e-13	0.880695	0.956	0.855	1.27127e-08	5	tgm2b
si:ch211-202n12.2	6.81135e-13	4.50609	0.059	0.001	1.72116e-08	5	si:ch211-202n12.2
vwa1.5	2.00636e-12	0.451716	1	0.992	5.06988e-08	5	vwa1
ednraa.3	2.04306e-12	0.425281	1	0.991	5.1626e-08	5	ednraa
grb10a.4	2.67663e-12	0.538093	1	0.963	6.76358e-08	5	grb10a
ptprb.3	2.75996e-12	0.555683	1	0.96	6.97413e-08	5	ptprb
foxc1a.3	5.12983e-12	1.14647	0.912	0.678	1.29626e-07	5	foxc1a
LO018124.1.3	8.44137e-12	1.74162	0.426	0.125	2.13305e-07	5	LO018124.1
fam167b.3	8.56572e-12	1.70459	0.618	0.295	2.16447e-07	5	fam167b
efemp2b.3	2.48075e-11	1.19124	0.868	0.672	6.2686e-07	5	efemp2b
cyp1a.3	2.91924e-11	1.07688	0.868	0.653	7.37662e-07	5	cyp1a
pdlim2.2	3.51953e-11	2.26922	0.382	0.115	8.89349e-07	5	pdlim2
mical3a	1.04946e-10	4.49313	0.059	0.002	2.65188e-06	5	mical3a
nr2f5	1.07843e-10	2.22556	0.544	0.258	2.72508e-06	5	nr2f5
ms4a17a.9.5	1.34569e-10	0.47712	0.971	0.945	3.40043e-06	5	ms4a17a.9
ugt1b1.1	1.41006e-10	0.673515	0.912	0.804	3.56307e-06	5	ugt1b1
sc:d189.3	1.53879e-10	0.967215	0.897	0.64	3.88837e-06	5	sc:d189
krt18a.1.4	3.52589e-10	0.214295	1	1	8.90956e-06	5	krt18a.1
cxcl12a.2	4.31336e-10	0.992785	0.897	0.74	1.08994e-05	5	cxcl12a
zfp36l1b.3	5.14864e-10	0.4726	1	0.973	1.30101e-05	5	zfp36l1b
gpm6ab.4	7.22034e-10	0.543814	0.985	0.864	1.82451e-05	5	gpm6ab
cpn1.3	8.10534e-10	0.267377	0.985	0.938	2.04814e-05	5	cpn1
edn1.5	1.03502e-09	0.936876	0.912	0.608	2.61538e-05	5	edn1
ptp4a3b.3	3.37787e-09	1.339	0.735	0.494	8.53553e-05	5	ptp4a3b
loxl1.4	4.07647e-09	0.56336	1	0.987	0.000103008	5	loxl1
si:dkey-261h17.1.4	4.40948e-09	0.258883	1	0.998	0.000111423	5	si:dkey-261h17.1
insra.4	6.26364e-09	0.796003	0.985	0.855	0.000158276	5	insra
carhsp1.4	1.29338e-08	0.60779	0.956	0.821	0.000326825	5	carhsp1
ccn2a.3	1.59279e-08	0.763097	0.956	0.833	0.000402482	5	ccn2a
prcp.2	3.20817e-08	0.691192	0.971	0.881	0.000810672	5	prcp
krt15.4	3.40402e-08	0.990953	0.809	0.604	0.000860163	5	krt15
cyp2ad6.2	5.46809e-08	1.34512	0.676	0.417	0.00138173	5	cyp2ad6
cnga1a	5.47666e-08	4.4411	0.059	0.004	0.0013839	5	cnga1a
sema6d.3	7.00029e-08	0.668169	0.956	0.841	0.0017689	5	sema6d
zgc:174888.3	9.02517e-08	1.13108	0.721	0.446	0.00228057	5	zgc:174888
cyp2p8	1.18856e-07	3.1257	0.088	0.01	0.00300338	5	cyp2p8
zgc:65851.3	1.23888e-07	0.918989	0.779	0.48	0.00313052	5	zgc:65851
lypd6	1.29999e-07	1.97423	0.456	0.228	0.00328495	5	lypd6
eppk1.4	1.45458e-07	1.13209	0.882	0.689	0.00367557	5	eppk1
si:ch211-255g12.6	1.48507e-07	4.51331	0.044	0.002	0.00375263	5	si:ch211-255g12.6
stab1.4	1.80847e-07	0.559906	0.971	0.961	0.00456981	5	stab1
exoc3l2a.5	1.91389e-07	0.839156	0.882	0.709	0.00483621	5	exoc3l2a
srgn.4	2.3202e-07	0.260497	1	0.977	0.00586291	5	srgn
si:ch211-208f21.2	2.40537e-07	4.3526	0.074	0.007	0.00607813	5	si:ch211-208f21.2
clec14a.4	2.70214e-07	0.310663	1	0.98	0.00682805	5	clec14a
calcrla.4	2.71036e-07	0.735627	0.897	0.7	0.00684881	5	calcrla
efna5b	3.01987e-07	2.77118	0.25	0.081	0.00763091	5	efna5b
nr2f1a.4	3.30176e-07	0.600576	0.971	0.824	0.00834321	5	nr2f1a
klf2b.2	5.25542e-07	0.329077	1	0.968	0.0132799	5	klf2b
id1.4	7.50901e-07	0.274462	1	0.976	0.0189745	5	id1
cyp3c1.1	9.34922e-07	0.500663	0.941	0.856	0.0236245	5	cyp3c1
nrp2b.2	9.83251e-07	0.620297	0.985	0.891	0.0248458	5	nrp2b
si:ch211-248e11.2.3	1.0984e-06	0.523498	0.941	0.756	0.0277554	5	si:ch211-248e11.2
plpp2a.4	1.11156e-06	0.607154	0.868	0.769	0.0280881	5	plpp2a
si:ch211-212k18.8.3	1.14547e-06	0.679242	0.765	0.634	0.028945	5	si:ch211-212k18.8
fam102aa	1.16714e-06	1.24752	0.559	0.318	0.0294925	5	fam102aa
icam3.2	1.23322e-06	0.830909	0.794	0.627	0.0311621	5	icam3
rgcc.4	1.38771e-06	0.401197	0.971	0.928	0.035066	5	rgcc
ehd2b.4	1.7053e-06	0.666923	0.956	0.909	0.0430911	5	ehd2b
zgc:64106.4	1.72576e-06	0.593402	0.971	0.741	0.0436081	5	zgc:64106
meox2a.1	1.88935e-06	1.69459	0.397	0.184	0.0477419	5	meox2a
si:ch211-286o17.1.1	2.0303e-06	1.21246	0.632	0.374	0.0513037	5	si:ch211-286o17.1
si:dkey-90l23.1.4	2.1095e-06	0.481953	1	0.841	0.0533048	5	si:dkey-90l23.1
cd81a.1	2.32377e-06	0.129989	1	1	0.0587192	5	cd81a
cdk14	2.34051e-06	1.96284	0.147	0.033	0.0591424	5	cdk14
si:ch211-238g23.1	2.59646e-06	1.95723	0.059	0.005	0.06561	5	si:ch211-238g23.1
mpp2b	2.63442e-06	2.74032	0.162	0.04	0.066569	5	mpp2b
si:dkey-16p19.5:2	2.68221e-06	3.61049	0.044	0.003	0.0677768	5	si:dkey-16p19.5:2
rhag.2	2.86931e-06	1.53352	0.574	0.335	0.0725045	5	rhag
cyp2ad2.3	2.91307e-06	1.16662	0.603	0.344	0.0736104	5	cyp2ad2
ehd4.5	3.01318e-06	0.300865	1	0.987	0.0761402	5	ehd4
bnc2.1	3.08012e-06	1.83424	0.529	0.331	0.0778317	5	bnc2
cited1.3	3.43606e-06	0.923603	0.765	0.598	0.0868258	5	cited1
kcnn1a.2	3.72175e-06	1.49383	0.515	0.29	0.0940449	5	kcnn1a
ccn1l2.3	3.78721e-06	0.509871	0.971	0.926	0.0956991	5	ccn1l2
hmcn2:1.4	2.2779e-96	5.43498	0.606	0.021	5.75603e-92	6	hmcn2:1
itgb1b.1.1	3.62366e-75	5.21209	0.591	0.034	9.15661e-71	6	itgb1b.1
pcbd1.2	6.21779e-70	3.92765	0.909	0.15	1.57117e-65	6	pcbd1
hapln1b.4	1.6112e-66	4.10347	0.758	0.083	4.07134e-62	6	hapln1b
znf385b.3	1.92347e-60	4.09317	0.848	0.143	4.86042e-56	6	znf385b
si:ch211-198m17.1.3	1.10335e-57	5.05826	0.727	0.097	2.78806e-53	6	si:ch211-198m17.1
qdpra	1.82551e-57	3.68161	1	0.283	4.61288e-53	6	qdpra
ttc36.3	3.4872e-55	3.38532	0.924	0.229	8.8118e-51	6	ttc36
antxr1a.1	3.18251e-54	4.66524	0.561	0.051	8.04189e-50	6	antxr1a
slit1a	2.59689e-53	3.9407	0.894	0.196	6.56209e-49	6	slit1a
msx1b.2	6.99928e-52	3.79353	0.879	0.201	1.76865e-47	6	msx1b
mmp11a.3	9.2178e-52	4.08253	0.818	0.164	2.32925e-47	6	mmp11a
txn.1	9.23412e-51	3.14275	0.848	0.164	2.33337e-46	6	txn
hoxa13b.1	1.80578e-50	4.21945	0.758	0.133	4.56302e-46	6	hoxa13b
col12a1b.5	2.02032e-49	4.18685	0.879	0.203	5.10516e-45	6	col12a1b
fbln1.5	5.26102e-49	2.64937	1	0.431	1.32941e-44	6	fbln1
crhr1.4	6.04198e-49	4.72971	0.788	0.156	1.52675e-44	6	crhr1
si:ch211-76l23.4.5	8.27368e-48	3.25406	0.924	0.293	2.09068e-43	6	si:ch211-76l23.4
ptger3	7.44643e-47	4.1708	0.667	0.103	1.88164e-42	6	ptger3
crispld2.3	8.83063e-47	4.09647	0.712	0.119	2.23141e-42	6	crispld2
fah.2	9.15082e-47	2.65597	0.985	0.395	2.31232e-42	6	fah
twist1a.1	4.77832e-46	4.09373	0.621	0.082	1.20743e-41	6	twist1a
ntd5.3	5.27951e-46	2.97723	0.985	0.385	1.33408e-41	6	ntd5
mxra8b.1	1.5689e-45	3.30433	0.909	0.248	3.96445e-41	6	mxra8b
si:dkey-12l12.1.5	1.87204e-45	3.38721	0.879	0.239	4.73045e-41	6	si:dkey-12l12.1
ppfibp2b.2	2.22535e-45	3.46134	0.909	0.274	5.62323e-41	6	ppfibp2b
pah.4	2.96285e-45	2.62026	0.985	0.487	7.48681e-41	6	pah
gch1.2	1.29847e-44	3.47048	0.909	0.281	3.2811e-40	6	gch1
zgc:66479.2	1.4803e-44	3.91174	0.803	0.191	3.74058e-40	6	zgc:66479
ved.1	1.51019e-44	3.89919	0.682	0.114	3.81611e-40	6	ved
mmp14a.2	2.08185e-44	3.63048	0.894	0.258	5.26063e-40	6	mmp14a
HAPLN1	1.19201e-43	5.2439	0.288	0.011	3.01209e-39	6	HAPLN1
aqp3a.4	3.92879e-43	2.57235	0.97	0.459	9.92767e-39	6	aqp3a
kazald3.2	5.21896e-43	3.63407	0.788	0.185	1.31878e-38	6	kazald3
ucp1.5	7.50448e-43	2.27746	1	0.584	1.89631e-38	6	ucp1
col22a1	1.15884e-42	4.59183	0.227	0.004	2.92828e-38	6	col22a1
tat.5	1.41578e-42	2.35234	0.97	0.5	3.57752e-38	6	tat
bhmt.2	1.49269e-42	2.34311	0.985	0.532	3.77187e-38	6	bhmt
msx2b.1	2.38536e-42	3.44111	0.848	0.239	6.02756e-38	6	msx2b
lrrc17.3	2.56282e-42	3.3645	0.909	0.316	6.47598e-38	6	lrrc17
col1a1a.5	3.04689e-42	1.75632	1	0.862	7.69919e-38	6	col1a1a
hpdb.4	3.15098e-42	2.1241	0.985	0.6	7.96221e-38	6	hpdb
tns2b.1	4.988e-42	4.71203	0.636	0.101	1.26042e-37	6	tns2b
aff2	8.15365e-42	4.60037	0.545	0.068	2.06034e-37	6	aff2
sema3e.5	9.34754e-42	3.34207	0.909	0.298	2.36203e-37	6	sema3e
lrrc58a.2	1.07032e-41	3.68784	0.742	0.155	2.7046e-37	6	lrrc58a
hgd.3	1.67504e-41	2.53137	0.97	0.549	4.23265e-37	6	hgd
notum1b.3	2.16877e-41	3.40119	0.909	0.28	5.48026e-37	6	notum1b
gpc1a.2	2.68749e-41	3.71316	0.803	0.193	6.79102e-37	6	gpc1a
and2.4	5.49757e-41	1.78639	1	0.739	1.38918e-36	6	and2
CABZ01074130.1.4	5.53927e-41	2.09874	0.985	0.625	1.39972e-36	6	CABZ01074130.1
thbs3b.3	1.43926e-40	3.41225	0.818	0.202	3.63687e-36	6	thbs3b
lrp1ab	4.91039e-40	4.34448	0.788	0.196	1.24081e-35	6	lrp1ab
plxdc2.3	6.32742e-40	3.42127	0.833	0.228	1.59887e-35	6	plxdc2
aldob.1	6.74752e-40	2.15404	0.97	0.553	1.70503e-35	6	aldob
vcanb.5	1.72005e-39	2.97456	0.955	0.438	4.3464e-35	6	vcanb
c1qtnf5.1	2.2736e-39	3.24575	0.833	0.271	5.74517e-35	6	c1qtnf5
crabp2a.2	2.44881e-39	3.436	0.833	0.237	6.18791e-35	6	crabp2a
ucp2.1	3.25654e-39	0.799765	1	0.995	8.22895e-35	6	ucp2
nrbp2a.1	3.84851e-39	3.37909	0.652	0.108	9.7248e-35	6	nrbp2a
adgrg6	4.23386e-39	2.66991	0.97	0.427	1.06985e-34	6	adgrg6
dnajb13	6.59518e-39	5.2175	0.273	0.011	1.66654e-34	6	dnajb13
mxra8a.2	9.47142e-39	3.32889	0.879	0.292	2.39333e-34	6	mxra8a
fzd9b.1	1.19221e-38	3.57767	0.788	0.203	3.01259e-34	6	fzd9b
ecrg4a.3	1.38903e-38	2.91233	0.864	0.299	3.50993e-34	6	ecrg4a
si:dkey-266m15.6.1	2.11694e-38	3.10329	0.894	0.286	5.34929e-34	6	si:dkey-266m15.6
capn12	3.7223e-38	4.21195	0.636	0.114	9.40588e-34	6	capn12
and1.4	5.03617e-38	2.10349	0.97	0.583	1.27259e-33	6	and1
prrx1b	7.48893e-38	3.8734	0.636	0.111	1.89238e-33	6	prrx1b
sh3pxd2ab.2	9.64681e-38	4.82573	0.424	0.042	2.43765e-33	6	sh3pxd2ab
itgb1b.2.1	1.75153e-37	3.64662	0.773	0.208	4.42594e-33	6	itgb1b.2
mdh1aa.1	1.92783e-37	1.43317	1	0.861	4.87144e-33	6	mdh1aa
gstz1.1	2.56199e-37	2.31425	0.939	0.392	6.4739e-33	6	gstz1
zgc:158328.1	2.82887e-37	4.30493	0.5	0.064	7.14826e-33	6	zgc:158328
emilin2b.4	3.70974e-37	3.46801	0.788	0.211	9.37415e-33	6	emilin2b
timp4.3.1	4.32e-37	3.79827	0.636	0.126	1.09162e-32	6	timp4.3
glud1b.1	4.93785e-37	1.52568	0.985	0.866	1.24774e-32	6	glud1b
fmoda.3	4.99814e-37	3.40925	0.788	0.223	1.26298e-32	6	fmoda
dlx3b	6.40662e-37	3.79945	0.682	0.143	1.61889e-32	6	dlx3b
lamc3.2	9.2039e-37	3.67675	0.742	0.171	2.32573e-32	6	lamc3
hmcn2.2	9.75975e-37	3.47208	0.833	0.249	2.46619e-32	6	hmcn2
vat1l.2	1.13232e-36	4.27503	0.47	0.056	2.86127e-32	6	vat1l
fam169ab.2	2.82663e-36	4.0032	0.576	0.098	7.14261e-32	6	fam169ab
pax9.1	4.24006e-36	3.74642	0.636	0.12	1.07142e-31	6	pax9
pdgfra.2	5.12045e-36	3.74295	0.742	0.185	1.29389e-31	6	pdgfra
gli2a.1	6.3516e-36	3.18923	0.742	0.169	1.60499e-31	6	gli2a
slc38a4.1	7.84703e-35	3.40709	0.788	0.222	1.98287e-30	6	slc38a4
colgalt2	1.11382e-34	3.90823	0.621	0.121	2.81452e-30	6	colgalt2
arl4ca.1	5.64839e-34	4.63413	0.47	0.064	1.42729e-29	6	arl4ca
daam1b.4	1.92676e-33	3.29002	0.727	0.187	4.86872e-29	6	daam1b
prrx1a	3.27892e-33	3.25328	0.788	0.239	8.2855e-29	6	prrx1a
pag1.3	3.66756e-33	2.79881	0.879	0.349	9.26757e-29	6	pag1
dnase1l4.1	5.52501e-33	3.9407	0.515	0.081	1.39611e-28	6	dnase1l4.1
slc16a10.3	7.17528e-33	1.15595	1	0.93	1.81312e-28	6	slc16a10
CABZ01085139.1.2	8.15481e-33	4.44103	0.409	0.047	2.06064e-28	6	CABZ01085139.1
bambib.1	1.09172e-32	2.37144	0.939	0.404	2.75867e-28	6	bambib
fibinb.2	1.63237e-32	3.69568	0.682	0.168	4.12483e-28	6	fibinb
robo3.4	1.90998e-32	2.42319	0.955	0.495	4.82633e-28	6	robo3
tgfbi.5	3.24846e-32	0.870678	1	0.985	8.20853e-28	6	tgfbi
zgc:174904	1.04307e-31	4.51257	0.424	0.052	2.63574e-27	6	zgc:174904
fmodb.1	1.28976e-31	4.02108	0.545	0.098	3.25909e-27	6	fmodb
si:ch211-246m6.5	1.37824e-31	4.87799	0.242	0.012	3.48268e-27	6	si:ch211-246m6.5
CABZ01069040.1.1	1.43141e-31	4.29086	0.409	0.049	3.61702e-27	6	CABZ01069040.1
nid2a.2	1.45469e-31	3.00612	0.803	0.257	3.67585e-27	6	nid2a
slc16a1b.2	1.49073e-31	3.04065	0.697	0.172	3.76693e-27	6	slc16a1b
tfap2a	3.16546e-31	3.82165	0.576	0.113	7.99879e-27	6	tfap2a
hoxc10a	3.54226e-31	4.61834	0.273	0.018	8.95092e-27	6	hoxc10a
hoxa11b.1	3.61071e-31	4.65122	0.409	0.05	9.12391e-27	6	hoxa11b
sox5.1	3.84778e-31	3.50294	0.682	0.164	9.72296e-27	6	sox5
msx3.2	1.13844e-30	3.3376	0.727	0.218	2.87673e-26	6	msx3
mxra5b.1	1.61132e-30	4.07985	0.636	0.146	4.07164e-26	6	mxra5b
twist3.2	3.71373e-30	3.42932	0.712	0.21	9.38423e-26	6	twist3
plcd4b.1	3.71495e-30	2.93787	0.727	0.196	9.38731e-26	6	plcd4b
ldhba.1	4.46935e-30	1.09431	0.985	0.906	1.12936e-25	6	ldhba
itgb3b.2	7.97811e-30	4.04223	0.515	0.091	2.01599e-25	6	itgb3b
sypl1.3	1.37114e-29	3.41167	0.561	0.111	3.46473e-25	6	sypl1
serpine2.1	1.5918e-29	1.20519	0.985	0.87	4.02231e-25	6	serpine2
ankhb	1.71212e-29	1.39163	0.318	0.026	4.32636e-25	6	ankhb
cdo1	4.81019e-29	2.7087	0.803	0.317	1.21549e-24	6	cdo1
fgfr2.3	6.71347e-29	3.05982	0.712	0.211	1.69643e-24	6	fgfr2
znf142.1	7.91132e-29	2.91648	0.652	0.145	1.99911e-24	6	znf142
klf15	1.58559e-28	2.38701	0.894	0.475	4.00662e-24	6	klf15
DHRS11.4	2.18666e-28	3.42665	0.576	0.121	5.52546e-24	6	DHRS11
CABZ01068367.1	2.35878e-28	4.56705	0.333	0.034	5.96039e-24	6	CABZ01068367.1
ptx3a.6	3.58033e-28	1.25807	0.985	0.827	9.04712e-24	6	ptx3a
sp8a.1	4.80907e-28	3.82566	0.545	0.108	1.2152e-23	6	sp8a
lxn.1	1.97279e-27	2.24844	0.848	0.338	4.98503e-23	6	lxn
chst2b	2.00242e-27	3.90097	0.561	0.122	5.05992e-23	6	chst2b
fbp1a.1	2.19944e-27	2.27626	0.864	0.366	5.55777e-23	6	fbp1a
si:ch211-51c14.1	2.65522e-27	3.65811	0.5	0.095	6.70947e-23	6	si:ch211-51c14.1
chsy1.1	3.07526e-27	3.18501	0.682	0.181	7.77086e-23	6	chsy1
disp1.2	3.35126e-27	2.84942	0.682	0.179	8.46831e-23	6	disp1
si:ch211-154c21.1	1.16791e-26	4.66417	0.227	0.014	2.9512e-22	6	si:ch211-154c21.1
fgf10a.3	1.22451e-26	2.90264	0.697	0.217	3.0942e-22	6	fgf10a
abi3bpb.3	1.25988e-26	2.34232	0.879	0.432	3.1836e-22	6	abi3bpb
mmp2.1	3.20674e-26	2.27356	0.879	0.507	8.10311e-22	6	mmp2
pcolcea.1	3.65017e-26	2.9364	0.712	0.235	9.22362e-22	6	pcolcea
zgc:114181.2	6.86281e-26	3.88208	0.5	0.097	1.73416e-21	6	zgc:114181
si:ch73-380l3.2:1	9.87496e-26	4.58527	0.212	0.012	2.4953e-21	6	si:ch73-380l3.2:1
nrip2	1.00845e-25	4.17064	0.439	0.073	2.54825e-21	6	nrip2
itgav	1.07371e-25	2.74582	0.727	0.243	2.71315e-21	6	itgav
NCEH1	1.33803e-25	4.71402	0.273	0.024	3.38108e-21	6	NCEH1
itga8.1	1.71945e-25	2.41486	0.848	0.38	4.34489e-21	6	itga8
abcc6a.3	2.5151e-25	4.29082	0.424	0.069	6.35541e-21	6	abcc6a
fkbp7	3.71083e-25	2.94305	0.545	0.119	9.3769e-21	6	fkbp7
mfap2.2	3.95903e-25	2.39251	0.833	0.371	1.00041e-20	6	mfap2
il17rd.1	4.44917e-25	3.13448	0.667	0.21	1.12426e-20	6	il17rd
gpt2l	4.46848e-25	2.90248	0.712	0.229	1.12914e-20	6	gpt2l
npffr1l2	4.70042e-25	4.37587	0.121	0.002	1.18775e-20	6	npffr1l2
lrrfip1b.1	4.84039e-25	3.72202	0.288	0.027	1.22312e-20	6	lrrfip1b
nradd	5.00891e-25	4.79101	0.197	0.011	1.2657e-20	6	nradd
alx4a.1	5.32298e-25	4.02312	0.47	0.087	1.34506e-20	6	alx4a
gpc5a	1.65591e-24	3.91464	0.364	0.05	4.18433e-20	6	gpc5a
dcn.2	1.66785e-24	2.47007	0.833	0.358	4.2145e-20	6	dcn
vap.2	2.04075e-24	1.40727	0.909	0.426	5.15677e-20	6	vap
creb3l1	2.24924e-24	3.37917	0.515	0.11	5.68359e-20	6	creb3l1
si:ch211-14k19.8.3	2.75871e-24	0.844483	1	0.967	6.97098e-20	6	si:ch211-14k19.8
col5a1.2	3.27201e-24	2.41728	0.879	0.465	8.26804e-20	6	col5a1
col2a1a.2	3.48072e-24	1.98124	0.455	0.07	8.79544e-20	6	col2a1a
cd82b.3	3.78321e-24	1.27573	0.955	0.813	9.5598e-20	6	cd82b
lrp1aa.1	4.68935e-24	3.46033	0.545	0.129	1.18495e-19	6	lrp1aa
CABZ01085140.1	5.3848e-24	4.08048	0.136	0.004	1.36069e-19	6	CABZ01085140.1
CABZ01059119.1.1	5.98755e-24	3.03794	0.455	0.08	1.51299e-19	6	CABZ01059119.1
rflnb	8.28358e-24	3.31726	0.53	0.118	2.09318e-19	6	rflnb
fthl27.3	8.40955e-24	0.53801	0.985	0.968	2.12501e-19	6	fthl27
myom1b.1	8.72696e-24	4.55903	0.212	0.014	2.20522e-19	6	myom1b
col2a1b.3	8.89574e-24	3.46591	0.667	0.21	2.24787e-19	6	col2a1b
rbp4	1.30859e-23	2.25534	0.818	0.366	3.30668e-19	6	rbp4
ccdc80l2.1	1.89058e-23	4.34416	0.409	0.07	4.7773e-19	6	ccdc80l2
fgfr1bl:1	1.90489e-23	4.67773	0.258	0.024	4.81346e-19	6	fgfr1bl:1
pck1.2	4.92827e-23	2.74231	0.773	0.284	1.24532e-18	6	pck1
lcat	5.16458e-23	4.74216	0.212	0.015	1.30504e-18	6	lcat
shisal1b	6.29742e-23	4.61631	0.197	0.012	1.5913e-18	6	shisal1b
ccdc80l1	6.57552e-23	4.2228	0.348	0.049	1.66157e-18	6	ccdc80l1
sparc.4	7.60399e-23	1.33972	0.955	0.716	1.92145e-18	6	sparc
FH.2	8.02342e-23	2.24899	0.697	0.215	2.02744e-18	6	FH
mcama	9.08634e-23	5.5256	0.303	0.037	2.29603e-18	6	mcama
cbr1l	1.05259e-22	2.59112	0.727	0.299	2.65979e-18	6	cbr1l
jakmip1	1.87252e-22	4.21011	0.288	0.033	4.73168e-18	6	jakmip1
rrbp1b	1.88743e-22	3.28431	0.485	0.103	4.76935e-18	6	rrbp1b
tmem119b.1	2.77681e-22	3.18065	0.545	0.138	7.01671e-18	6	tmem119b
selenop.4	3.37191e-22	0.507013	1	0.994	8.52048e-18	6	selenop
akr1b1.1.2	7.46371e-22	3.44522	0.561	0.157	1.88601e-17	6	akr1b1.1
sema3fa	8.0179e-22	3.35047	0.561	0.152	2.02604e-17	6	sema3fa
cbarpb.1	2.33e-21	4.12308	0.303	0.039	5.88767e-17	6	cbarpb
tfap2c	5.08877e-21	3.69986	0.591	0.177	1.28588e-16	6	tfap2c
cdh2.2	6.02341e-21	2.55974	0.727	0.294	1.52206e-16	6	cdh2
si:dkey-74k8.4	1.09182e-20	7.09946	0.091	0.001	2.75891e-16	6	si:dkey-74k8.4
th2	1.15045e-20	6.42799	0.091	0.001	2.90706e-16	6	th2
gfra4b.1	1.54094e-20	3.6227	0.439	0.093	3.89381e-16	6	gfra4b
hoxb6b	1.85624e-20	7.42967	0.076	0	4.69052e-16	6	hoxb6b
CABZ01103860.1	1.85624e-20	8.53296	0.076	0	4.69052e-16	6	CABZ01103860.1
p2rx2	1.92451e-20	2.98307	0.258	0.027	4.86305e-16	6	p2rx2
mpdu1a	3.90843e-20	3.33887	0.485	0.117	9.8762e-16	6	mpdu1a
si:ch211-140m22.7.1	5.43867e-20	1.81099	0.773	0.326	1.3743e-15	6	si:ch211-140m22.7
phgdh.1	5.98214e-20	3.64971	0.485	0.118	1.51163e-15	6	phgdh
si:dkey-164f24.2	6.08859e-20	3.21916	0.485	0.117	1.53853e-15	6	si:dkey-164f24.2
im:7150988.2	6.3981e-20	3.23119	0.455	0.103	1.61674e-15	6	im:7150988
fthl31.3	6.6339e-20	0.938693	0.939	0.639	1.67632e-15	6	fthl31
batf3	6.8695e-20	5.09015	0.152	0.008	1.73585e-15	6	batf3
got2b	6.89358e-20	1.72187	0.894	0.545	1.74194e-15	6	got2b
ptpn13.1	9.9668e-20	3.47913	0.455	0.105	2.51851e-15	6	ptpn13
nt5e	1.05969e-19	3.76075	0.409	0.083	2.67773e-15	6	nt5e
cacna1c	1.1948e-19	4.69465	0.197	0.016	3.01913e-15	6	cacna1c
gpm6bb.1	1.33973e-19	2.7861	0.515	0.133	3.38536e-15	6	gpm6bb
col12a1a	1.56914e-19	2.30107	0.773	0.351	3.96507e-15	6	col12a1a
cass4	1.77976e-19	4.65654	0.182	0.013	4.49728e-15	6	cass4
rhpn2	1.89037e-19	3.06864	0.455	0.103	4.77677e-15	6	rhpn2
antxr1c.2	2.15285e-19	2.35108	0.727	0.291	5.44005e-15	6	antxr1c
cebpd.4	3.77666e-19	0.748434	1	0.947	9.54325e-15	6	cebpd
RAPH1.2	3.91433e-19	1.50948	0.924	0.6	9.89111e-15	6	RAPH1
BX511021.1.2	4.23923e-19	2.57339	0.424	0.086	1.07121e-14	6	BX511021.1
bicc1a	4.57354e-19	3.47238	0.273	0.034	1.15569e-14	6	bicc1a
si:ch211-246m6.5:1	6.19743e-19	3.69871	0.394	0.08	1.56603e-14	6	si:ch211-246m6.5:1
cth	8.70193e-19	2.44051	0.697	0.297	2.19889e-14	6	cth
f3a	9.58594e-19	2.67425	0.485	0.119	2.42227e-14	6	f3a
afap1l2.2	1.03304e-18	2.12637	0.803	0.429	2.61038e-14	6	afap1l2
lrrc4ca	1.08135e-18	5.04442	0.152	0.009	2.73246e-14	6	lrrc4ca
hyal4	1.34509e-18	3.70179	0.47	0.127	3.39891e-14	6	hyal4
adamts3	1.45639e-18	4.33829	0.182	0.014	3.68016e-14	6	adamts3
si:ch73-380l3.2.1	2.02968e-18	4.10541	0.227	0.025	5.12879e-14	6	si:ch73-380l3.2
gdf6a.1	2.38389e-18	4.00182	0.318	0.052	6.02386e-14	6	gdf6a
cfp.1	2.52997e-18	2.95598	0.409	0.084	6.39297e-14	6	cfp
sult6b1.1	2.9114e-18	1.15044	0.955	0.71	7.35682e-14	6	sult6b1
twist1b	3.37696e-18	3.90768	0.288	0.042	8.53325e-14	6	twist1b
fthl29.3	3.49565e-18	1.23341	0.894	0.536	8.83316e-14	6	fthl29
fh	3.57724e-18	1.71249	0.833	0.451	9.03934e-14	6	fh
ccdc3a	5.04015e-18	3.69609	0.333	0.058	1.2736e-13	6	ccdc3a
setd1bb	6.75438e-18	4.05529	0.091	0.002	1.70676e-13	6	setd1bb
aldh6a1	7.1676e-18	1.37298	0.924	0.732	1.81118e-13	6	aldh6a1
arhgef4.2	7.57001e-18	2.52223	0.621	0.21	1.91287e-13	6	arhgef4
nfil3-6.2	7.84876e-18	2.80833	0.455	0.106	1.9833e-13	6	nfil3-6
gpc1b	7.93229e-18	3.23332	0.5	0.137	2.00441e-13	6	gpc1b
ANPEP	8.41107e-18	3.4494	0.379	0.075	2.12539e-13	6	ANPEP
sort1a	8.6894e-18	2.62628	0.682	0.268	2.19572e-13	6	sort1a
nck2b.2	8.8166e-18	2.53659	0.591	0.196	2.22787e-13	6	nck2b
cbsb	9.89781e-18	3.88165	0.333	0.06	2.50108e-13	6	cbsb
rcn3.1	1.50034e-17	3.0412	0.485	0.134	3.79122e-13	6	rcn3
frzb	1.82342e-17	3.74074	0.379	0.077	4.60761e-13	6	frzb
BX957362.5	1.96175e-17	3.74478	0.167	0.012	4.95715e-13	6	BX957362.5
rnf152	2.30672e-17	5.12798	0.197	0.019	5.82884e-13	6	rnf152
fkbp10b	2.55648e-17	2.63931	0.576	0.202	6.45997e-13	6	fkbp10b
lratd1.3	2.89893e-17	4.26548	0.242	0.031	7.3253e-13	6	lratd1
KDELR3	3.19016e-17	2.7122	0.364	0.07	8.06121e-13	6	KDELR3
hpda.1	4.22816e-17	3.00316	0.47	0.126	1.06841e-12	6	hpda
fgfrl1b.2	4.70986e-17	2.51676	0.652	0.244	1.19013e-12	6	fgfrl1b
hoxa13a	4.79878e-17	3.85754	0.348	0.07	1.2126e-12	6	hoxa13a
col9a1b	4.89916e-17	2.75819	0.212	0.022	1.23797e-12	6	col9a1b
gulp1a.1	5.44879e-17	2.84769	0.424	0.102	1.37686e-12	6	gulp1a
spon2b.1	6.10117e-17	4.17069	0.303	0.052	1.5417e-12	6	spon2b
olfml3b.2	7.76861e-17	3.43299	0.409	0.1	1.96305e-12	6	olfml3b
CABZ01039304.1	9.67761e-17	4.57684	0.182	0.017	2.44544e-12	6	CABZ01039304.1
pleca	1.32246e-16	2.1995	0.818	0.477	3.34171e-12	6	pleca
sh3d21.2	1.37991e-16	2.9278	0.439	0.113	3.48689e-12	6	sh3d21
pdgfrl	1.43367e-16	3.8369	0.303	0.053	3.62275e-12	6	pdgfrl
slc23a2	1.83713e-16	2.35589	0.636	0.246	4.64225e-12	6	slc23a2
aff3.2	2.09018e-16	3.91242	0.273	0.042	5.28167e-12	6	aff3
fbln2.3	2.1001e-16	0.77459	1	0.958	5.30673e-12	6	fbln2
gstp1.4	2.41864e-16	0.891652	0.939	0.766	6.11165e-12	6	gstp1
msmo1.1	2.7478e-16	2.70352	0.409	0.094	6.94342e-12	6	msmo1
got1.1	2.92375e-16	2.1864	0.712	0.332	7.38803e-12	6	got1
hs3st3b1a	3.447e-16	4.35524	0.167	0.014	8.71022e-12	6	hs3st3b1a
sgms2a	3.68691e-16	3.4703	0.333	0.065	9.31646e-12	6	sgms2a
BX640522.1.1	3.70562e-16	3.38858	0.394	0.095	9.36374e-12	6	BX640522.1
afap1l1a.3	3.79384e-16	2.13948	0.682	0.313	9.58665e-12	6	afap1l1a
acss2l	3.84007e-16	4.00724	0.227	0.029	9.70346e-12	6	acss2l
esr2b	3.97458e-16	5.89488	0.152	0.011	1.00434e-11	6	esr2b
junbb.1	4.03358e-16	0.874564	0.985	0.887	1.01925e-11	6	junbb
ism2a	5.11006e-16	3.01542	0.409	0.098	1.29126e-11	6	ism2a
acy3.2	5.15258e-16	2.66069	0.485	0.147	1.30201e-11	6	acy3.2
kirrel1a.2	5.47912e-16	2.9896	0.333	0.064	1.38452e-11	6	kirrel1a
fat1a.1	5.78988e-16	3.03132	0.394	0.091	1.46305e-11	6	fat1a
slc16a12b.1	5.99567e-16	2.61912	0.591	0.207	1.51505e-11	6	slc16a12b
col11a1b	6.31891e-16	3.93613	0.303	0.054	1.59673e-11	6	col11a1b
vstm4a.5	7.12934e-16	1.44355	0.879	0.565	1.80151e-11	6	vstm4a
ubb.1	9.33645e-16	0.661311	1	0.898	2.35923e-11	6	ubb
sptbn2	1.04649e-15	3.43392	0.364	0.079	2.64437e-11	6	sptbn2
irs2a	1.26153e-15	2.82978	0.47	0.132	3.18775e-11	6	irs2a
pitx1.3	1.28352e-15	3.5714	0.288	0.049	3.24334e-11	6	pitx1
ca6.2	1.92965e-15	3.01627	0.424	0.11	4.87603e-11	6	ca6
tuba8l2.1	1.93623e-15	2.23619	0.667	0.305	4.89266e-11	6	tuba8l2
ptgdsb.1	1.94424e-15	1.8666	0.758	0.388	4.91289e-11	6	ptgdsb.1
tmem123	2.84134e-15	5.55212	0.121	0.007	7.17979e-11	6	tmem123
hoxc12a	2.88362e-15	5.13714	0.121	0.007	7.28661e-11	6	hoxc12a
chpfa	3.40622e-15	3.49252	0.273	0.045	8.60718e-11	6	chpfa
tcf7	3.50149e-15	3.5761	0.227	0.031	8.84792e-11	6	tcf7
col6a2.1	3.86169e-15	3.64974	0.333	0.069	9.7581e-11	6	col6a2
kremen1	3.97678e-15	2.94047	0.424	0.111	1.00489e-10	6	kremen1
frem1a	4.00911e-15	3.75443	0.394	0.1	1.01306e-10	6	frem1a
atf3.1	4.07076e-15	2.46216	0.5	0.15	1.02864e-10	6	atf3
phyhd1	4.32129e-15	2.96744	0.409	0.111	1.09195e-10	6	phyhd1
nags	5.11627e-15	3.34573	0.121	0.007	1.29283e-10	6	nags
inka1a.2	5.22385e-15	1.85764	0.727	0.419	1.32002e-10	6	inka1a
enpp2.2	5.65496e-15	3.23754	0.379	0.088	1.42895e-10	6	enpp2
bambia.4	6.31061e-15	0.731652	0.985	0.933	1.59463e-10	6	bambia
srgap3.2	6.48418e-15	1.72823	0.712	0.289	1.63849e-10	6	srgap3
zgc:153031	8.51881e-15	3.81703	0.212	0.027	2.15262e-10	6	zgc:153031
kdelr3	8.85762e-15	2.09018	0.53	0.166	2.23823e-10	6	kdelr3
tpbga	1.59797e-14	3.31239	0.318	0.065	4.0379e-10	6	tpbga
col16a1	1.96258e-14	2.88915	0.394	0.099	4.95924e-10	6	col16a1
ankmy1	2.03593e-14	4.00526	0.167	0.017	5.1446e-10	6	ankmy1
si:ch211-225b11.1.1	2.07936e-14	1.41113	0.848	0.489	5.25433e-10	6	si:ch211-225b11.1
sp9	2.38507e-14	3.65902	0.364	0.09	6.02683e-10	6	sp9
ddt	2.38707e-14	1.48929	0.758	0.428	6.03188e-10	6	ddt
acsl4b.3	2.81526e-14	2.13104	0.606	0.221	7.11388e-10	6	acsl4b
ormdl3.1	2.90656e-14	3.8772	0.212	0.029	7.3446e-10	6	ormdl3
pck2.1	3.17239e-14	3.35964	0.273	0.048	8.0163e-10	6	pck2
ldlrap1a	3.27278e-14	3.31113	0.288	0.055	8.26999e-10	6	ldlrap1a
timp2a.2	3.63287e-14	0.931265	0.955	0.859	9.1799e-10	6	timp2a
wnt5b.1	3.7491e-14	2.37358	0.485	0.146	9.4736e-10	6	wnt5b
rassf8b.1	3.81205e-14	3.30418	0.348	0.081	9.63268e-10	6	rassf8b
BX908388.3	3.84345e-14	3.7304	0.136	0.011	9.71202e-10	6	BX908388.3
sept15.1	4.19401e-14	1.57655	0.818	0.485	1.05979e-09	6	2024-09-15
si:ch73-86n18.1.2	4.64059e-14	1.78324	0.712	0.378	1.17263e-09	6	si:ch73-86n18.1
si:dkey-157g16.6	5.18351e-14	4.76047	0.152	0.014	1.30982e-09	6	si:dkey-157g16.6
cd82a.6	5.42376e-14	0.838732	0.985	0.894	1.37053e-09	6	cd82a
tbx20	5.75707e-14	3.60147	0.273	0.05	1.45475e-09	6	tbx20
CABZ01068358.1	6.16934e-14	4.13951	0.212	0.03	1.55893e-09	6	CABZ01068358.1
dmgdh.2	6.72544e-14	3.15741	0.409	0.114	1.69945e-09	6	dmgdh
postnb	6.87734e-14	2.20563	0.682	0.319	1.73783e-09	6	postnb
sdc4	8.39617e-14	0.758108	0.985	0.914	2.12163e-09	6	sdc4
ablim3.2	1.13426e-13	2.58641	0.439	0.129	2.86615e-09	6	ablim3
matn4.2	1.75565e-13	2.17055	0.742	0.397	4.43634e-09	6	matn4
hoxd12a	2.67994e-13	4.7215	0.182	0.023	6.77193e-09	6	hoxd12a
AXL	2.70278e-13	4.47405	0.152	0.015	6.82964e-09	6	AXL
dennd3a	3.85087e-13	3.70939	0.333	0.079	9.73077e-09	6	dennd3a
unc5b	3.91436e-13	3.25244	0.303	0.065	9.8912e-09	6	unc5b
CABZ01080056.1	4.26559e-13	3.76342	0.182	0.023	1.07787e-08	6	CABZ01080056.1
ak4.1	4.58375e-13	2.04834	0.636	0.31	1.15827e-08	6	ak4
CABZ01084942.1	5.13968e-13	2.75417	0.152	0.015	1.29875e-08	6	CABZ01084942.1
gabrr3a	7.2894e-13	7.38734	0.045	0	1.84196e-08	6	gabrr3a
vstm4b	7.2894e-13	6.90828	0.045	0	1.84196e-08	6	vstm4b
nr6a1b	7.69417e-13	4.32719	0.136	0.012	1.94424e-08	6	nr6a1b
hoxc11a	8.14021e-13	3.65873	0.212	0.033	2.05695e-08	6	hoxc11a
tnc.2	8.27867e-13	3.92955	0.303	0.069	2.09194e-08	6	tnc
col11a1a	8.38392e-13	2.43064	0.409	0.112	2.11853e-08	6	col11a1a
col6a4a	8.87009e-13	3.06963	0.485	0.168	2.24138e-08	6	col6a4a
bcar3.1	9.45214e-13	2.19813	0.455	0.146	2.38846e-08	6	bcar3
BX927333.1	9.84872e-13	3.82139	0.136	0.012	2.48867e-08	6	BX927333.1
cd79b	1.01071e-12	3.84045	0.091	0.004	2.55397e-08	6	cd79b
dacha.2	1.08125e-12	1.50173	0.818	0.553	2.73221e-08	6	dacha
ralyl	1.38977e-12	3.11598	0.258	0.05	3.51182e-08	6	ralyl
b4galnt2.2	1.44414e-12	4.17603	0.076	0.003	3.6492e-08	6	b4galnt2.2
aifm4	1.49058e-12	3.81553	0.227	0.039	3.76655e-08	6	aifm4
me2	1.53588e-12	1.98192	0.606	0.256	3.88102e-08	6	me2
slc10a1	1.57275e-12	4.30961	0.167	0.02	3.97418e-08	6	slc10a1
pparab	1.58716e-12	3.24328	0.212	0.033	4.0106e-08	6	pparab
notum1a.1	1.62907e-12	2.94895	0.364	0.095	4.11649e-08	6	notum1a
IGLON5	1.67696e-12	4.1299	0.167	0.02	4.2375e-08	6	IGLON5
gsg1l	1.75282e-12	4.86316	0.182	0.025	4.42919e-08	6	gsg1l
C25H11orf96.3	1.76307e-12	2.87466	0.379	0.103	4.45511e-08	6	C25H11orf96
ltk	1.81996e-12	4.27456	0.197	0.028	4.59885e-08	6	ltk
junba.5	1.87294e-12	0.663725	0.97	0.919	4.73273e-08	6	junba
caly	1.9471e-12	4.28851	0.106	0.007	4.92012e-08	6	caly
meig1	2.00093e-12	4.30179	0.106	0.007	5.05616e-08	6	meig1
col5a2a.1	2.05654e-12	1.96757	0.758	0.475	5.19668e-08	6	col5a2a
arhgap32b.1	2.50683e-12	3.27226	0.318	0.075	6.3345e-08	6	arhgap32b
hoxc3a.1	4.9763e-12	2.64519	0.303	0.07	1.25746e-07	6	hoxc3a
greb1l	5.09235e-12	3.40902	0.242	0.046	1.28679e-07	6	greb1l
fabp3	5.72445e-12	1.80782	0.576	0.24	1.44651e-07	6	fabp3
hoxb10a	6.67943e-12	3.48874	0.167	0.021	1.68783e-07	6	hoxb10a
pfkfb1	7.53568e-12	4.9231	0.136	0.014	1.90419e-07	6	pfkfb1
dlx2a	7.73395e-12	4.4137	0.152	0.018	1.95429e-07	6	dlx2a
nt5c2b	7.86264e-12	2.08644	0.53	0.2	1.98681e-07	6	nt5c2b
ecm2	7.88123e-12	3.28008	0.258	0.051	1.99151e-07	6	ecm2
sec24d	8.62111e-12	2.31552	0.5	0.183	2.17847e-07	6	sec24d
cdon	9.32243e-12	1.87216	0.682	0.352	2.35568e-07	6	cdon
gys1.1	1.09245e-11	2.69375	0.455	0.158	2.7605e-07	6	gys1
fhl2a	1.27327e-11	2.65333	0.394	0.122	3.21742e-07	6	fhl2a
si:ch211-51a6.2.1	1.3582e-11	3.53252	0.318	0.085	3.43204e-07	6	si:ch211-51a6.2
antxr1b	1.43255e-11	4.06303	0.227	0.042	3.61991e-07	6	antxr1b
si:ch211-15b10.6	1.4732e-11	2.00946	0.545	0.229	3.72262e-07	6	si:ch211-15b10.6
hist2h2l.1	1.69547e-11	1.08474	0.848	0.548	4.28429e-07	6	hist2h2l
IQSEC1.3	1.84272e-11	2.08999	0.424	0.133	4.65636e-07	6	IQSEC1
amph	2.049e-11	1.82758	0.106	0.008	5.17763e-07	6	amph
fgfr1a.1	2.04968e-11	3.23803	0.227	0.042	5.17933e-07	6	fgfr1a
slc4a10a	3.10364e-11	3.87942	0.167	0.023	7.84259e-07	6	slc4a10a
si:dkey-104n9.1	3.29056e-11	2.55331	0.333	0.091	8.31491e-07	6	si:dkey-104n9.1
cldn19	3.64915e-11	5.13186	0.076	0.004	9.22105e-07	6	cldn19
plekha6.1	3.94322e-11	2.83781	0.333	0.09	9.96413e-07	6	plekha6
cebpb.4	4.10876e-11	1.00326	0.879	0.721	1.03824e-06	6	cebpb
frem2b.1	4.21649e-11	2.73248	0.182	0.027	1.06547e-06	6	frem2b
si:dkey-283j8.1	4.49016e-11	6.21702	0.061	0.002	1.13462e-06	6	si:dkey-283j8.1
CABZ01087502.1	4.49016e-11	6.27831	0.061	0.002	1.13462e-06	6	CABZ01087502.1
mogat3a	4.55573e-11	2.92579	0.288	0.07	1.15119e-06	6	mogat3a
pigr	4.56996e-11	3.89951	0.182	0.028	1.15478e-06	6	pigr
adamts9.1	4.66017e-11	2.24368	0.455	0.155	1.17758e-06	6	adamts9
tgm8	4.67484e-11	6.26134	0.061	0.002	1.18129e-06	6	tgm8
ctsk.2	5.25664e-11	1.10319	0.879	0.668	1.3283e-06	6	ctsk
zic2a.2	5.62435e-11	1.14962	0.864	0.693	1.42122e-06	6	zic2a
ghrb	5.68142e-11	1.27475	0.848	0.584	1.43564e-06	6	ghrb
cybrd1	6.17363e-11	2.08576	0.53	0.231	1.56002e-06	6	cybrd1
CU138547.1	6.18273e-11	3.02668	0.136	0.015	1.56231e-06	6	CU138547.1
asip2b	6.6291e-11	3.67369	0.333	0.097	1.67511e-06	6	asip2b
SCARF2.2	7.01657e-11	2.01332	0.576	0.281	1.77302e-06	6	SCARF2
hoxc8a	7.71135e-11	3.06159	0.242	0.05	1.94858e-06	6	hoxc8a
gadd45ga	8.03869e-11	3.56019	0.242	0.051	2.0313e-06	6	gadd45ga
si:ch211-37e10.2	8.88839e-11	3.87775	0.212	0.039	2.24601e-06	6	si:ch211-37e10.2
XKR4	9.94417e-11	3.166	0.152	0.019	2.51279e-06	6	XKR4
hoxc9a.4	1.05689e-10	1.90204	0.379	0.111	2.67065e-06	6	hoxc9a
tmem176.3	1.06427e-10	0.956042	0.864	0.639	2.68931e-06	6	tmem176
zgc:110796	1.08827e-10	3.1654	0.273	0.065	2.74995e-06	6	zgc:110796
zic5.2	1.15038e-10	2.3212	0.5	0.2	2.90689e-06	6	zic5
klf11b	1.20479e-10	1.52856	0.667	0.323	3.04439e-06	6	klf11b
kcng3	1.21648e-10	4.00362	0.121	0.012	3.07392e-06	6	kcng3
si:ch73-237c6.1.2	1.21828e-10	2.12028	0.485	0.194	3.07847e-06	6	si:ch73-237c6.1
inppl1b	1.22592e-10	3.66014	0.197	0.034	3.09778e-06	6	inppl1b
srpx	1.27001e-10	2.21083	0.485	0.195	3.2092e-06	6	srpx
abca1b	1.29269e-10	2.14759	0.53	0.216	3.26651e-06	6	abca1b
pnpla6	1.37486e-10	2.01141	0.576	0.263	3.47413e-06	6	pnpla6
cacnb2b	1.43373e-10	2.08491	0.091	0.006	3.62289e-06	6	cacnb2b
meis1a.1	1.44492e-10	1.90941	0.5	0.204	3.65117e-06	6	meis1a
prkag2a	1.78119e-10	2.83476	0.303	0.082	4.50088e-06	6	prkag2a
axin2.2	1.87984e-10	1.69637	0.742	0.42	4.75018e-06	6	axin2
thbs3a	1.97059e-10	3.0699	0.318	0.086	4.97947e-06	6	thbs3a
prdx6	1.97183e-10	1.27873	0.727	0.406	4.98261e-06	6	prdx6
nid1a	2.04731e-10	1.67825	0.727	0.373	5.17336e-06	6	nid1a
pappaa	2.10574e-10	4.17067	0.182	0.029	5.321e-06	6	pappaa
fkbp11	2.46638e-10	4.41588	0.136	0.017	6.23229e-06	6	fkbp11
tnfaip6	2.60631e-10	2.97296	0.288	0.076	6.58587e-06	6	tnfaip6
slc27a1b:1	2.77445e-10	4.66994	0.136	0.017	7.01076e-06	6	slc27a1b:1
klhl29.1	3.22581e-10	4.06812	0.197	0.036	8.1513e-06	6	klhl29
srd5a1	3.41407e-10	3.69937	0.136	0.017	8.62701e-06	6	srd5a1
acot17	3.5939e-10	2.70453	0.212	0.041	9.08142e-06	6	acot17
prelid3b.1	4.3759e-10	0.726098	0.97	0.874	1.10575e-05	6	prelid3b
zic3	5.01062e-10	3.98563	0.182	0.031	1.26613e-05	6	zic3
chpfb	5.14962e-10	6.00872	0.076	0.004	1.30126e-05	6	chpfb
llgl1.1	5.5558e-10	2.54324	0.348	0.109	1.40389e-05	6	llgl1
mdh2	5.69671e-10	0.839876	0.924	0.864	1.4395e-05	6	mdh2
gabrp	5.71086e-10	4.92151	0.076	0.004	1.44308e-05	6	gabrp
ackr4b.1	6.14262e-10	2.54147	0.47	0.209	1.55218e-05	6	ackr4b
acot14	6.21633e-10	1.95029	0.364	0.111	1.5708e-05	6	acot14
xbp1.2	6.66763e-10	0.517009	0.985	0.921	1.68484e-05	6	xbp1
ackr4a	6.75299e-10	4.21375	0.091	0.007	1.70641e-05	6	ackr4a
plxna1a.1	6.91284e-10	2.71979	0.424	0.16	1.74681e-05	6	plxna1a
thrap3a	7.19302e-10	3.86416	0.136	0.018	1.8176e-05	6	thrap3a
col6a3:1	7.25578e-10	3.74539	0.136	0.018	1.83346e-05	6	col6a3:1
lonrf1l.2	7.2642e-10	0.965538	0.879	0.571	1.83559e-05	6	lonrf1l
slc25a34.1	7.29469e-10	2.11861	0.364	0.114	1.8433e-05	6	slc25a34
deptor	7.66509e-10	1.65205	0.591	0.279	1.93689e-05	6	deptor
bmp2a	7.81399e-10	2.61388	0.394	0.149	1.97452e-05	6	bmp2a
znrf3.1	8.01084e-10	2.26149	0.379	0.127	2.02426e-05	6	znrf3
C6H3orf18	9.59722e-10	3.58566	0.182	0.033	2.42512e-05	6	C6H3orf18
slc1a5.1	1.04509e-09	2.083	0.424	0.151	2.64084e-05	6	slc1a5
pcolce2b.1	1.04684e-09	2.25328	0.485	0.205	2.64525e-05	6	pcolce2b
angpt4	1.06112e-09	7.05119	0.045	0.001	2.68135e-05	6	angpt4
PDE1C	1.06112e-09	6.15982	0.045	0.001	2.68135e-05	6	PDE1C
AL954848.1	1.06112e-09	5.53586	0.045	0.001	2.68135e-05	6	AL954848.1
slc5a1	1.08572e-09	5.843	0.045	0.001	2.74352e-05	6	slc5a1
NPAS4	1.11088e-09	4.78112	0.045	0.001	2.80709e-05	6	NPAS4
si:ch211-149e23.4	1.11088e-09	5.69549	0.045	0.001	2.80709e-05	6	si:ch211-149e23.4
dzip1	1.13403e-09	3.21069	0.152	0.022	2.86559e-05	6	dzip1
admp	1.13661e-09	2.77247	0.045	0.001	2.8721e-05	6	admp
edil3a	1.14296e-09	3.21184	0.152	0.022	2.88814e-05	6	edil3a
gnmt	1.18014e-09	2.15582	0.5	0.218	2.98208e-05	6	gnmt
acsl1b.1	1.19064e-09	2.16665	0.561	0.248	3.00863e-05	6	acsl1b
si:ch211-136a13.1	1.21664e-09	3.11292	0.303	0.086	3.07434e-05	6	si:ch211-136a13.1
sept9a.5	1.26434e-09	0.674419	0.97	0.927	3.19487e-05	6	sept9a
si:dkey-44g23.5	1.27253e-09	2.43799	0.364	0.12	3.21556e-05	6	si:dkey-44g23.5
creb3l2.1	1.27799e-09	1.07739	0.864	0.638	3.22934e-05	6	creb3l2
hoxa10b	1.52845e-09	3.86437	0.152	0.023	3.86225e-05	6	hoxa10b
zgc:154125	1.54993e-09	4.00704	0.106	0.011	3.91653e-05	6	zgc:154125
ucp3	1.58191e-09	3.57883	0.197	0.039	3.99733e-05	6	ucp3
zgc:113307	1.66422e-09	3.85493	0.167	0.028	4.20531e-05	6	zgc:113307
yap1.1	1.67247e-09	0.974348	0.909	0.681	4.22616e-05	6	yap1
pdgfrb	1.7222e-09	2.44036	0.439	0.179	4.35183e-05	6	pdgfrb
slc7a8a.1	1.72319e-09	1.67442	0.682	0.408	4.35433e-05	6	slc7a8a
zgc:153675.1	1.74058e-09	1.92508	0.47	0.209	4.39828e-05	6	zgc:153675
rsrp1	1.79222e-09	1.24994	0.742	0.446	4.52876e-05	6	rsrp1
aebp1	1.94328e-09	2.61872	0.348	0.111	4.91049e-05	6	aebp1
lgals3bpa	1.96095e-09	4.64038	0.061	0.003	4.95513e-05	6	lgals3bpa
rgs16	1.99473e-09	5.41645	0.061	0.003	5.04049e-05	6	rgs16
ttc9b.1	2.01298e-09	2.36129	0.212	0.043	5.08661e-05	6	ttc9b
gabbr2	2.09952e-09	3.63252	0.061	0.003	5.30528e-05	6	gabbr2
pimr212	2.13563e-09	2.91894	0.061	0.003	5.39652e-05	6	pimr212
slc7a10a	2.60603e-09	3.47594	0.152	0.023	6.58517e-05	6	slc7a10a
pde10a	2.70162e-09	2.16524	0.47	0.199	6.82672e-05	6	pde10a
msi2b	2.83383e-09	1.80929	0.455	0.178	7.1608e-05	6	msi2b
keap1b	2.86601e-09	1.54968	0.667	0.373	7.24211e-05	6	keap1b
xylt1	2.94825e-09	1.89782	0.455	0.181	7.44994e-05	6	xylt1
si:dkey-91i10.3	3.07693e-09	3.998	0.152	0.024	7.7751e-05	6	si:dkey-91i10.3
prx	3.28963e-09	3.15943	0.288	0.081	8.31256e-05	6	prx
asph	3.50209e-09	1.21181	0.803	0.575	8.84944e-05	6	asph
lrrc58b.1	3.75681e-09	1.18298	0.727	0.454	9.49309e-05	6	lrrc58b
kank1a.3	3.91155e-09	1.86352	0.652	0.357	9.88409e-05	6	kank1a
hoxa9b	4.21938e-09	3.1096	0.182	0.034	0.000106619	6	hoxa9b
akap7	4.45446e-09	3.91849	0.106	0.011	0.00011256	6	akap7
mst1	4.7385e-09	3.14687	0.318	0.099	0.000119737	6	mst1
cyp4t8	4.79458e-09	6.89885	0.03	0	0.000121154	6	cyp4t8
cpa6	4.79458e-09	5.31947	0.03	0	0.000121154	6	cpa6
pla2g4ab	4.79458e-09	6.8018	0.03	0	0.000121154	6	pla2g4ab
hivep2b	4.79458e-09	6.09595	0.03	0	0.000121154	6	hivep2b
calml4b	4.79458e-09	7.38444	0.03	0	0.000121154	6	calml4b
si:ch211-197l9.5	4.79458e-09	7.14382	0.03	0	0.000121154	6	si:ch211-197l9.5
CR847844.1	4.79458e-09	6.9997	0.03	0	0.000121154	6	CR847844.1
tmem196b	4.79458e-09	7.14128	0.03	0	0.000121154	6	tmem196b
si:dkey-90a13.10	4.79458e-09	7.21745	0.03	0	0.000121154	6	si:dkey-90a13.10
si:ch211-153f2.3	4.79458e-09	7.51	0.03	0	0.000121154	6	si:ch211-153f2.3
CR759810.1	4.79458e-09	6.42897	0.03	0	0.000121154	6	CR759810.1
CU462913.1	4.79458e-09	6.59213	0.03	0	0.000121154	6	CU462913.1
si:ch211-175m2.4	4.79458e-09	7.05937	0.03	0	0.000121154	6	si:ch211-175m2.4
si:dkey-199f5.3	4.79458e-09	5.44891	0.03	0	0.000121154	6	si:dkey-199f5.3
CABZ01043826.1	4.79458e-09	7.01066	0.03	0	0.000121154	6	CABZ01043826.1
CT027583.1	4.79458e-09	6.97701	0.03	0	0.000121154	6	CT027583.1
taar20r	4.79458e-09	5.53168	0.03	0	0.000121154	6	taar20r
BX510301.2	4.79458e-09	7.05563	0.03	0	0.000121154	6	BX510301.2
znf503	4.82771e-09	2.17155	0.5	0.227	0.000121991	6	znf503
nav3.1	5.09588e-09	1.44294	0.682	0.357	0.000128768	6	nav3
abr	5.10949e-09	3.16363	0.136	0.019	0.000129112	6	abr
rhcgb	5.21365e-09	5.07482	0.076	0.005	0.000131744	6	rhcgb
tob1b.1	5.31958e-09	0.937079	0.864	0.716	0.000134421	6	tob1b
hibadha	5.3617e-09	2.8078	0.227	0.052	0.000135485	6	hibadha
gcdha	5.7032e-09	2.16997	0.455	0.195	0.000144114	6	gcdha
fosab.3	5.74102e-09	0.52694	1	0.938	0.00014507	6	fosab
prdm1a	6.83408e-09	1.64853	0.712	0.437	0.00017269	6	prdm1a
bach1b	7.00031e-09	2.13055	0.515	0.233	0.000176891	6	bach1b
acot15	7.07294e-09	2.10744	0.424	0.174	0.000178726	6	acot15
acy3.1	7.3721e-09	2.75906	0.106	0.011	0.000186286	6	acy3.1
tnmd.1	7.42143e-09	3.23738	0.227	0.053	0.000187532	6	tnmd
midn.2	7.46014e-09	0.723541	0.879	0.756	0.00018851	6	midn
ppfibp2a	7.57362e-09	3.26198	0.273	0.079	0.000191378	6	ppfibp2a
isl2a	7.73759e-09	4.11655	0.167	0.031	0.000195521	6	isl2a
zgc:174895	8.95757e-09	3.43697	0.136	0.02	0.000226349	6	zgc:174895
tshz3a	1.09632e-08	1.32042	0.773	0.491	0.000277028	6	tshz3a
mtss1lb.3	1.13611e-08	0.930707	0.879	0.675	0.000287084	6	mtss1lb
wnk1b	1.1414e-08	1.21178	0.833	0.552	0.000288421	6	wnk1b
sod1	1.19336e-08	0.816473	0.833	0.612	0.00030155	6	sod1
ier2b.1	1.19834e-08	0.494284	1	0.937	0.000302808	6	ier2b
neu3.2	1.2452e-08	3.01363	0.242	0.064	0.00031465	6	neu3.2
arid3c	1.25163e-08	1.9981	0.409	0.164	0.000316275	6	arid3c
syn2b	1.34378e-08	4.67205	0.091	0.009	0.000339561	6	syn2b
tbx18	1.48763e-08	3.51617	0.167	0.031	0.000375908	6	tbx18
BX649448.4.1	1.51245e-08	3.77781	0.091	0.009	0.000382182	6	BX649448.4
galnt2	1.58317e-08	1.57691	0.652	0.407	0.000400052	6	galnt2
mxi1.2	1.60095e-08	1.04383	0.864	0.769	0.000404545	6	mxi1
irs2b.1	1.74726e-08	2.41329	0.439	0.184	0.000441515	6	irs2b
nck1a.2	1.82743e-08	1.00798	0.848	0.638	0.000461773	6	nck1a
sfrp2	1.88578e-08	4.14151	0.152	0.027	0.000476517	6	sfrp2
ush1c	1.88601e-08	4.54205	0.121	0.017	0.000476576	6	ush1c
tspo	1.95897e-08	0.834588	0.894	0.599	0.000495013	6	tspo
stard13b	2.20791e-08	2.88996	0.288	0.088	0.000557916	6	stard13b
mettl24	2.28378e-08	3.12357	0.167	0.032	0.000577089	6	mettl24
h2ax1.3	2.32639e-08	0.42174	0.985	0.928	0.000587856	6	h2ax1
dip2cb	2.68698e-08	3.07384	0.167	0.032	0.000678974	6	dip2cb
acaca.1	2.7472e-08	1.61288	0.5	0.225	0.000694191	6	acaca
si:dkey-242h9.5	3.14062e-08	4.23381	0.076	0.006	0.000793603	6	si:dkey-242h9.5
fuom	3.15306e-08	4.1267	0.061	0.004	0.000796748	6	fuom
tmem200b	3.31632e-08	3.77468	0.136	0.022	0.000838001	6	tmem200b
trim35-19	3.39503e-08	3.8094	0.061	0.004	0.000857889	6	trim35-19
[truncated: 584 more rows]

## Sheet: DEG_7dpf
7 dpf	p_val	avg_log2FC	pct.1	pct.2	p_val_adj	cluster	gene
plvapb	2.38144e-67	2.1599	0.982	0.971	6.01766e-63	0	plvapb
aqp1a.1	1.3811e-62	3.6719	0.925	0.764	3.48991e-58	0	aqp1a.1
rgcc	2.41803e-57	2.09596	0.958	0.822	6.11012e-53	0	rgcc
plvapa	9.91867e-54	3.53989	0.901	0.703	2.50635e-49	0	plvapa
podxl	2.1801e-52	2.01997	0.961	0.869	5.50891e-48	0	podxl
si:ch211-156j16.1	2.10239e-48	1.79353	0.951	0.909	5.31253e-44	0	si:ch211-156j16.1
cdh5	1.32537e-46	1.65739	0.94	0.831	3.34907e-42	0	cdh5
zgc:112332	5.08068e-46	3.74648	0.761	0.458	1.28384e-41	0	zgc:112332
myl9a	1.53999e-44	3.4137	0.732	0.414	3.8914e-40	0	myl9a
s1pr5a	4.09711e-43	3.21129	0.839	0.525	1.0353e-38	0	s1pr5a
acvrl1	4.57512e-39	2.4111	0.914	0.729	1.15609e-34	0	acvrl1
epas1a	5.3334e-38	2.77922	0.852	0.677	1.3477e-33	0	epas1a
aplnrb	5.564e-37	1.8692	0.94	0.862	1.40597e-32	0	aplnrb
pecam1	9.49741e-36	1.81995	0.894	0.789	2.3999e-31	0	pecam1
agtr1b	3.31463e-35	3.69129	0.706	0.409	8.37573e-31	0	agtr1b
id1	5.83733e-35	1.32599	0.938	0.89	1.47503e-30	0	id1
krt18a.1	1.48771e-34	0.970967	0.99	0.996	3.7593e-30	0	krt18a.1
ca4a	2.78382e-34	4.21643	0.678	0.41	7.03444e-30	0	ca4a
ca16b	7.78654e-34	2.26465	0.795	0.533	1.96758e-29	0	ca16b
foxf2a	1.98368e-32	4.20624	0.623	0.332	5.01257e-28	0	foxf2a
foxf2b	2.21247e-31	3.66939	0.566	0.266	5.59069e-27	0	foxf2b
aplnra	1.85757e-29	2.15336	0.829	0.608	4.69389e-25	0	aplnra
six3a	3.72596e-28	4.35022	0.579	0.313	9.41513e-24	0	six3a
jam2a	4.08789e-28	1.48692	0.93	0.853	1.03297e-23	0	jam2a
scarb2a	4.84705e-28	1.46931	0.945	0.872	1.2248e-23	0	scarb2a
zgc:153311	9.01667e-28	4.32132	0.719	0.426	2.27842e-23	0	zgc:153311
si:dkey-19b23.8	4.38887e-27	1.38289	0.875	0.722	1.10902e-22	0	si:dkey-19b23.8
abcb4	5.16494e-27	1.1365	0.753	0.512	1.30513e-22	0	abcb4
foxl2a	8.28875e-27	4.10923	0.478	0.198	2.09449e-22	0	foxl2a
ACKR2	9.76445e-27	3.06731	0.522	0.232	2.46738e-22	0	ACKR2
ldb2a	1.5616e-26	1.2585	0.873	0.734	3.94602e-22	0	ldb2a
igfbp7	4.90022e-26	0.855028	0.984	0.965	1.23824e-21	0	igfbp7
eppk1	2.61796e-25	0.665366	0.745	0.504	6.61534e-21	0	eppk1
amotl2a	5.07168e-25	1.72383	0.878	0.702	1.28156e-20	0	amotl2a
vwa1	1.89805e-24	1.48517	0.951	0.879	4.79617e-20	0	vwa1
slc6a2	1.06939e-23	3.84728	0.53	0.274	2.70225e-19	0	slc6a2
mob2b	1.2685e-23	2.01822	0.774	0.514	3.20537e-19	0	mob2b
krt94	1.86584e-23	1.53518	0.927	0.838	4.71479e-19	0	krt94
lpl	2.43597e-23	2.1046	0.891	0.766	6.15546e-19	0	lpl
ptprb	3.50737e-23	1.25402	0.945	0.858	8.86278e-19	0	ptprb
si:dkey-261h17.1	3.5305e-23	1.34421	0.977	0.946	8.92122e-19	0	si:dkey-261h17.1
il6r	7.7705e-23	3.17185	0.577	0.319	1.96353e-18	0	il6r
cfd	1.73673e-22	2.51023	0.774	0.544	4.38854e-18	0	cfd
slc29a1a	3.33072e-22	3.4957	0.592	0.345	8.41639e-18	0	slc29a1a
flrt2	3.38831e-22	1.91072	0.634	0.383	8.56191e-18	0	flrt2
exoc3l2a	5.35741e-22	2.27605	0.634	0.381	1.35376e-17	0	exoc3l2a
sox7	1.06473e-21	1.31482	0.904	0.813	2.69045e-17	0	sox7
pcdh1b	1.27289e-21	1.99859	0.756	0.554	3.21648e-17	0	pcdh1b
crip2	1.99396e-21	1.43451	0.894	0.774	5.03854e-17	0	crip2
polr2b	2.2293e-21	0.705084	0.987	0.984	5.63321e-17	0	polr2b
hpgd	4.27505e-21	4.09252	0.366	0.135	1.08026e-16	0	hpgd
rbpms2b	5.75169e-21	1.54617	0.8	0.616	1.45339e-16	0	rbpms2b
ftr83	5.79533e-21	3.24983	0.532	0.283	1.46442e-16	0	ftr83
trpm4a	6e-21	2.93755	0.444	0.199	1.51614e-16	0	trpm4a
basp1	6.04092e-21	2.95823	0.434	0.192	1.52648e-16	0	basp1
sox18	2.06508e-20	1.26985	0.914	0.834	5.21826e-16	0	sox18
epas1b	2.39437e-20	1.05162	0.912	0.805	6.05033e-16	0	epas1b
ncam3	2.77142e-20	5.16116	0.423	0.172	7.00309e-16	0	ncam3
fkbp1b	3.14539e-20	2.67592	0.584	0.354	7.94808e-16	0	fkbp1b
nrp1a	4.66741e-20	2.54593	0.603	0.347	1.17941e-15	0	nrp1a
ndufa4l2a	5.0859e-20	3.00311	0.361	0.131	1.28516e-15	0	ndufa4l2a
cav2	6.57581e-20	2.54968	0.686	0.475	1.66164e-15	0	cav2
galnt18b	8.81856e-20	3.54236	0.514	0.26	2.22836e-15	0	galnt18b
flt1	1.09794e-19	0.979307	0.919	0.82	2.77437e-15	0	flt1
rasgrp3	1.25276e-19	1.79563	0.665	0.406	3.16561e-15	0	rasgrp3
si:dkey-126g1.9	1.50809e-19	1.13264	0.834	0.651	3.8108e-15	0	si:dkey-126g1.9
ehd4	2.52429e-19	1.03563	0.966	0.941	6.37863e-15	0	ehd4
rtn3	3.27485e-19	1.57785	0.797	0.587	8.27522e-15	0	rtn3
cobll1a	8.17072e-19	4.33202	0.345	0.134	2.06466e-14	0	cobll1a
hlx1	1.03283e-18	0.908333	0.94	0.864	2.60986e-14	0	hlx1
ccn1l1	1.17859e-18	4.71405	0.364	0.146	2.97819e-14	0	ccn1l1
slc26a10	1.89088e-18	3.08285	0.41	0.183	4.77806e-14	0	slc26a10
abcc2	2.29827e-18	1.14553	0.631	0.405	5.80749e-14	0	abcc2
cav1	2.32901e-18	1.42136	0.899	0.793	5.88518e-14	0	cav1
ftr82	5.88294e-18	1.27725	0.803	0.681	1.48656e-13	0	ftr82
id3	1.17834e-17	1.66996	0.784	0.605	2.97755e-13	0	id3
hopx	2.42606e-17	1.20112	0.862	0.792	6.13041e-13	0	hopx
mfng	3.41155e-17	1.49536	0.756	0.601	8.62065e-13	0	mfng
znf366	6.61082e-17	1.79375	0.514	0.29	1.67049e-12	0	znf366
abcg2a	7.0062e-17	1.15746	0.914	0.828	1.7704e-12	0	abcg2a
vsir	8.44819e-17	1.93419	0.59	0.364	2.13477e-12	0	vsir
foxl2b	9.25928e-17	3.27691	0.397	0.188	2.33973e-12	0	foxl2b
mmel1	1.23645e-16	3.90558	0.418	0.206	3.12438e-12	0	mmel1
plpp3	1.44399e-16	1.31207	0.849	0.678	3.64882e-12	0	plpp3
gulp1b	1.63759e-16	2.85612	0.47	0.245	4.13803e-12	0	gulp1b
pdgfbb	1.97518e-16	1.91464	0.766	0.586	4.99109e-12	0	pdgfbb
tspan5a	1.98757e-16	1.38673	0.696	0.484	5.02239e-12	0	tspan5a
krt93	2.24302e-16	0.981504	0.275	0.09	5.66789e-12	0	krt93
dspa	2.41707e-16	1.77596	0.597	0.376	6.10769e-12	0	dspa
gata3	3.71482e-16	2.707	0.418	0.204	9.38698e-12	0	gata3
efnb2a	4.06816e-16	1.3347	0.73	0.525	1.02798e-11	0	efnb2a
krt8	6.80176e-16	0.636431	0.997	0.997	1.71874e-11	0	krt8
kdrl	7.16755e-16	0.381669	0.984	0.978	1.81117e-11	0	kdrl
id2a	9.74938e-16	1.84262	0.616	0.368	2.46357e-11	0	id2a
jag2b	1.82123e-15	1.48235	0.771	0.601	4.60206e-11	0	jag2b
pkp3b	2.61309e-15	1.28668	0.813	0.657	6.60302e-11	0	pkp3b
sema3ga	3.04074e-15	1.76839	0.436	0.218	7.68364e-11	0	sema3ga
cyp8b2	4.12792e-15	2.55023	0.19	0.045	1.04308e-10	0	cyp8b2
si:dkey-49n23.1	6.41456e-15	1.07019	0.766	0.565	1.62089e-10	0	si:dkey-49n23.1
ugt1a1	6.65937e-15	1.79119	0.579	0.386	1.68275e-10	0	ugt1a1
CABZ01067151.1	7.36363e-15	1.9675	0.457	0.257	1.86072e-10	0	CABZ01067151.1
shroom4	1.53223e-14	1.26892	0.745	0.552	3.87178e-10	0	shroom4
efnb2b	2.04267e-14	1.12669	0.782	0.612	5.16163e-10	0	efnb2b
mcamb	2.31469e-14	1.50178	0.764	0.571	5.84899e-10	0	mcamb
pitpnaa	2.34636e-14	1.18545	0.829	0.689	5.92902e-10	0	pitpnaa
lrrn1	2.55669e-14	2.51959	0.545	0.328	6.4605e-10	0	lrrn1
sorbs2b	2.75279e-14	2.61845	0.532	0.335	6.95602e-10	0	sorbs2b
limch1b	2.82307e-14	1.11849	0.881	0.743	7.13363e-10	0	limch1b
si:ch211-225h24.2	2.8355e-14	1.36586	0.483	0.275	7.16501e-10	0	si:ch211-225h24.2
efnb1	3.09076e-14	1.96687	0.236	0.078	7.81003e-10	0	efnb1
si:dkey-56m19.5	3.47017e-14	1.93845	0.727	0.534	8.76878e-10	0	si:dkey-56m19.5
bcl2l10	3.60056e-14	2.14646	0.618	0.41	9.09825e-10	0	bcl2l10
efemp2b	4.49691e-14	2.6498	0.603	0.409	1.13632e-09	0	efemp2b
sc:d189	4.7478e-14	1.21588	0.743	0.55	1.19972e-09	0	sc:d189
ptmaa	6.03844e-14	1.19156	0.904	0.798	1.52585e-09	0	ptmaa
slc9a3r1b	7.7923e-14	1.22738	0.618	0.413	1.96904e-09	0	slc9a3r1b
clec14a	1.00102e-13	0.520271	0.969	0.936	2.52947e-09	0	clec14a
rgs3a	1.14944e-13	1.38343	0.844	0.733	2.90452e-09	0	rgs3a
fli1b	1.35961e-13	0.835001	0.912	0.83	3.43559e-09	0	fli1b
cd99	1.37361e-13	1.24808	0.813	0.665	3.47097e-09	0	cd99
fxyd1	1.47311e-13	1.11043	0.771	0.608	3.7224e-09	0	fxyd1
notchl	1.7528e-13	0.623873	0.925	0.819	4.42916e-09	0	notchl
si:ch211-71m22.1	1.75396e-13	1.46809	0.743	0.599	4.43209e-09	0	si:ch211-71m22.1
fsta	1.98478e-13	5.3454	0.236	0.082	5.01535e-09	0	fsta
cdc42ep1a	2.15065e-13	1.47868	0.525	0.309	5.43447e-09	0	cdc42ep1a
mcm5	2.19623e-13	1.18139	0.709	0.501	5.54965e-09	0	mcm5
mcm2	2.42503e-13	1.29681	0.753	0.575	6.12781e-09	0	mcm2
smad7	2.70614e-13	1.07403	0.649	0.448	6.83815e-09	0	smad7
pdgfba	3.55806e-13	1.18559	0.779	0.621	8.99087e-09	0	pdgfba
mao	3.71888e-13	1.78013	0.543	0.345	9.39723e-09	0	mao
cyp2p6	6.10573e-13	1.28973	0.696	0.51	1.54286e-08	0	cyp2p6
cyp2ad3	7.18384e-13	1.08318	0.912	0.851	1.81529e-08	0	cyp2ad3
chad	7.30251e-13	5.67543	0.322	0.151	1.84527e-08	0	chad
si:dkey-34d22.1	7.82404e-13	1.79491	0.504	0.307	1.97706e-08	0	si:dkey-34d22.1
arhgef2	8.37845e-13	1.81918	0.26	0.099	2.11715e-08	0	arhgef2
clic4	8.47465e-13	0.977697	0.901	0.796	2.14146e-08	0	clic4
si:dkey-31f5.11	1.44975e-12	2.92667	0.522	0.335	3.66338e-08	0	si:dkey-31f5.11
si:ch211-145b13.6	1.45411e-12	0.685032	0.875	0.801	3.67438e-08	0	si:ch211-145b13.6
igfbp3	1.47411e-12	1.14464	0.701	0.481	3.72493e-08	0	igfbp3
CABZ01030107.1	1.49006e-12	1.62787	0.699	0.51	3.76524e-08	0	CABZ01030107.1
camk2g2	2.60545e-12	1.99442	0.468	0.275	6.58372e-08	0	camk2g2
mcf2l2	2.85248e-12	1.41184	0.59	0.405	7.20792e-08	0	mcf2l2
tmem47	4.10629e-12	1.35901	0.569	0.36	1.03762e-07	0	tmem47
gpm6aa	4.28391e-12	3.12311	0.54	0.369	1.0825e-07	0	gpm6aa
zgc:171686	4.34494e-12	1.15125	0.613	0.435	1.09792e-07	0	zgc:171686
hpca	5.09198e-12	1.17679	0.722	0.55	1.28669e-07	0	hpca
spns2	5.23802e-12	0.633249	0.904	0.865	1.3236e-07	0	spns2
alpl	5.29458e-12	0.884107	0.727	0.559	1.33789e-07	0	alpl
heg1	5.59204e-12	1.016	0.673	0.495	1.41305e-07	0	heg1
igfbp1a	5.59261e-12	0.981881	0.945	0.922	1.4132e-07	0	igfbp1a
pold1	7.04707e-12	1.49381	0.392	0.196	1.78072e-07	0	pold1
ralgapa1	7.17712e-12	1.48921	0.699	0.538	1.81359e-07	0	ralgapa1
smox	7.58207e-12	0.81956	0.881	0.781	1.91591e-07	0	smox
coro2bb	7.89954e-12	2.52486	0.46	0.283	1.99613e-07	0	coro2bb
cyp2ad6	7.92174e-12	0.982914	0.616	0.414	2.00174e-07	0	cyp2ad6
amotl2b	8.3227e-12	2.16108	0.431	0.252	2.10306e-07	0	amotl2b
thbd	8.9813e-12	1.39985	0.291	0.128	2.26948e-07	0	thbd
kank4	1.11468e-11	2.06909	0.39	0.207	2.81669e-07	0	kank4
si:ch73-334d15.2	1.19701e-11	0.684881	0.652	0.477	3.02474e-07	0	si:ch73-334d15.2
cldn5b	1.27601e-11	0.933308	0.917	0.817	3.22434e-07	0	cldn5b
plekhg2	1.42072e-11	1.04461	0.488	0.285	3.59002e-07	0	plekhg2
nrp1b	1.45344e-11	1.7289	0.444	0.26	3.67269e-07	0	nrp1b
sost	1.54335e-11	3.8353	0.312	0.143	3.8999e-07	0	sost
rgs3b	1.6363e-11	1.04936	0.621	0.451	4.13478e-07	0	rgs3b
sult2st3	2.50694e-11	2.88491	0.322	0.158	6.33478e-07	0	sult2st3
apbb2b	2.75394e-11	1.43983	0.512	0.33	6.95894e-07	0	apbb2b
il15	2.79931e-11	0.97349	0.504	0.32	7.07359e-07	0	il15
sult1st1	2.96176e-11	1.05672	0.803	0.643	7.48406e-07	0	sult1st1
ptp4a3b	3.10685e-11	2.1473	0.496	0.298	7.85071e-07	0	ptp4a3b
tmsb4x	3.17942e-11	0.431622	0.971	0.986	8.03409e-07	0	tmsb4x
sri	3.83552e-11	1.13027	0.891	0.772	9.69198e-07	0	sri
si:dkey-27i16.2	4.11755e-11	1.37137	0.442	0.27	1.04046e-06	0	si:dkey-27i16.2
f2rl2	5.83789e-11	1.16175	0.616	0.437	1.47518e-06	0	f2rl2
kif26ab	7.24606e-11	2.16414	0.364	0.193	1.83101e-06	0	kif26ab
dlc	7.77259e-11	0.652304	0.873	0.774	1.96405e-06	0	dlc
tgm1l1	7.97758e-11	0.406112	0.527	0.341	2.01586e-06	0	tgm1l1
flot1b	7.98555e-11	0.84768	0.894	0.779	2.01787e-06	0	flot1b
wu:fc21g02	8.0221e-11	0.436218	0.681	0.437	2.0271e-06	0	wu:fc21g02
CT990561.1	8.51722e-11	6.2138	0.184	0.063	2.15222e-06	0	CT990561.1
itga6b	9.00259e-11	2.73692	0.481	0.3	2.27487e-06	0	itga6b
tuft1a	9.39016e-11	1.19778	0.587	0.418	2.3728e-06	0	tuft1a
ankrd54	9.78895e-11	0.841625	0.416	0.225	2.47357e-06	0	ankrd54
kalrnb	1.01002e-10	1.30488	0.649	0.48	2.55223e-06	0	kalrnb
rbpms2a	1.07129e-10	0.929594	0.704	0.526	2.70705e-06	0	rbpms2a
timp4.1	1.10267e-10	2.4784	0.273	0.121	2.78633e-06	0	timp4.1
itga1	1.12438e-10	1.61916	0.509	0.334	2.84119e-06	0	itga1
ier5l	1.1371e-10	1.00746	0.732	0.544	2.87333e-06	0	ier5l
nasp	1.16182e-10	1.00489	0.665	0.467	2.9358e-06	0	nasp
emid1	1.20003e-10	0.932096	0.751	0.583	3.03236e-06	0	emid1
flrt3	1.2123e-10	0.865199	0.79	0.666	3.06336e-06	0	flrt3
pdlim2	1.26981e-10	3.06304	0.187	0.065	3.20868e-06	0	pdlim2
lrrc15	1.27893e-10	1.14648	0.787	0.674	3.23172e-06	0	lrrc15
tmsb1	1.29905e-10	1.64875	0.403	0.241	3.28258e-06	0	tmsb1
chp2	1.45571e-10	1.02404	0.717	0.534	3.67844e-06	0	chp2
cited1	1.48057e-10	1.01989	0.704	0.515	3.74124e-06	0	cited1
ap1m1	1.76119e-10	0.901022	0.543	0.354	4.45035e-06	0	ap1m1
ralgps2	1.82083e-10	2.12514	0.4	0.225	4.60107e-06	0	ralgps2
mcm3	1.85215e-10	1.51401	0.67	0.512	4.6802e-06	0	mcm3
lfng	1.88427e-10	0.786701	0.94	0.921	4.76135e-06	0	lfng
fzd4	1.90554e-10	0.781809	0.829	0.662	4.81512e-06	0	fzd4
ednraa	2.25339e-10	0.791608	0.956	0.941	5.69409e-06	0	ednraa
gnai2a	2.37065e-10	0.864658	0.912	0.86	5.99041e-06	0	gnai2a
gja5b	2.48443e-10	3.67693	0.234	0.099	6.27791e-06	0	gja5b
porcnl	2.6425e-10	1.45442	0.234	0.097	6.67733e-06	0	porcnl
smarcd3b	2.74502e-10	2.73185	0.281	0.129	6.93638e-06	0	smarcd3b
hspa12b	3.27498e-10	0.762913	0.836	0.768	8.27554e-06	0	hspa12b
dbn1	3.4349e-10	1.74493	0.332	0.173	8.67966e-06	0	dbn1
ahnak	3.54251e-10	0.879797	0.909	0.843	8.95157e-06	0	ahnak
vat1	3.83643e-10	0.997862	0.899	0.796	9.69428e-06	0	vat1
fam83ha	5.07746e-10	0.690959	0.626	0.456	1.28302e-05	0	fam83ha
akap13	5.53374e-10	0.786608	0.644	0.451	1.39832e-05	0	akap13
slc12a2	6.42311e-10	0.705604	0.816	0.632	1.62306e-05	0	slc12a2
zgc:113531	6.66132e-10	1.15366	0.491	0.317	1.68325e-05	0	zgc:113531
ephb4a	6.71547e-10	0.823044	0.803	0.676	1.69693e-05	0	ephb4a
gata2a	7.11603e-10	0.877225	0.774	0.621	1.79815e-05	0	gata2a
cyp2aa7	7.14547e-10	1.51065	0.343	0.189	1.80559e-05	0	cyp2aa7
meox1	7.77618e-10	2.71335	0.616	0.465	1.96496e-05	0	meox1
mcm4	8.27476e-10	1.34604	0.691	0.531	2.09095e-05	0	mcm4
irx5a	8.33892e-10	2.63245	0.283	0.139	2.10716e-05	0	irx5a
ccdc28b	9.00853e-10	2.20209	0.273	0.134	2.27637e-05	0	ccdc28b
si:dkey-38p12.3	9.20153e-10	1.19608	0.66	0.511	2.32513e-05	0	si:dkey-38p12.3
fzd8a	9.77964e-10	1.63463	0.239	0.102	2.47122e-05	0	fzd8a
p4ha1b	1.01457e-09	1.47588	0.283	0.14	2.56373e-05	0	p4ha1b
CABZ01088025.1	1.16626e-09	3.28637	0.21	0.086	2.94702e-05	0	CABZ01088025.1
crip3	1.17783e-09	1.56954	0.395	0.232	2.97626e-05	0	crip3
tnfsf10l	1.28851e-09	1.55073	0.468	0.292	3.25593e-05	0	tnfsf10l
tagln2	1.36054e-09	0.715273	0.953	0.936	3.43794e-05	0	tagln2
tcf7l1a	1.46228e-09	1.50841	0.603	0.424	3.69503e-05	0	tcf7l1a
cd22	1.55793e-09	4.07771	0.156	0.052	3.93674e-05	0	cd22
actr1	1.57368e-09	0.712449	0.764	0.606	3.97654e-05	0	actr1
BX284638.2	1.60105e-09	1.78489	0.491	0.323	4.04569e-05	0	BX284638.2
pa2g4a	1.62025e-09	0.612879	0.719	0.559	4.09422e-05	0	pa2g4a
s100v2	1.73182e-09	0.792781	0.701	0.523	4.37615e-05	0	s100v2
rnd3a	1.73316e-09	0.851411	0.787	0.642	4.37951e-05	0	rnd3a
kirrel3l	1.7697e-09	1.38651	0.639	0.481	4.47185e-05	0	kirrel3l
cdca7a	2.02114e-09	1.10563	0.605	0.425	5.10722e-05	0	cdca7a
si:ch73-61d6.3	2.19988e-09	0.923729	0.384	0.222	5.55887e-05	0	si:ch73-61d6.3
ccnd1	2.28093e-09	0.762605	0.787	0.647	5.76367e-05	0	ccnd1
tmem108	2.39726e-09	0.68568	0.878	0.831	6.05764e-05	0	tmem108
nutf2	2.56052e-09	0.766626	0.519	0.338	6.47017e-05	0	nutf2
plpp1a	2.62525e-09	0.356257	0.896	0.789	6.63374e-05	0	plpp1a
oaz2a	2.75153e-09	0.761993	0.899	0.811	6.95283e-05	0	oaz2a
si:ch211-136m16.8	2.77485e-09	2.97252	0.221	0.095	7.01176e-05	0	si:ch211-136m16.8
abhd17b	3.19876e-09	1.7112	0.558	0.395	8.08295e-05	0	abhd17b
baiap2b	3.54309e-09	0.984777	0.353	0.193	8.95303e-05	0	baiap2b
frem1b	3.62265e-09	1.4895	0.371	0.214	9.15407e-05	0	frem1b
smc3	3.64102e-09	0.825126	0.548	0.362	9.2005e-05	0	smc3
cct4	3.77434e-09	0.751712	0.888	0.797	9.53738e-05	0	cct4
exoc2	4.04865e-09	0.49075	0.6	0.416	0.000102305	0	exoc2
mmrn2b	4.07238e-09	1.54703	0.426	0.252	0.000102905	0	mmrn2b
si:ch211-1a19.3	4.08574e-09	0.531942	0.722	0.554	0.000103243	0	si:ch211-1a19.3
ccn1l2	4.81214e-09	0.836151	0.842	0.728	0.000121598	0	ccn1l2
ehd2b	4.82429e-09	1.62509	0.756	0.598	0.000121905	0	ehd2b
fryl	4.88923e-09	0.609524	0.613	0.446	0.000123546	0	fryl
tlr5b	4.92171e-09	0.834825	0.54	0.372	0.000124367	0	tlr5b
zgc:173544	5.01203e-09	0.455782	0.805	0.646	0.000126649	0	zgc:173544
CABZ01076275.1	5.16984e-09	1.58274	0.66	0.512	0.000130637	0	CABZ01076275.1
palm1b	5.40702e-09	0.749171	0.805	0.713	0.00013663	0	palm1b
slain1a	5.42558e-09	1.82834	0.114	0.029	0.000137099	0	slain1a
fkbp4	5.42887e-09	0.837443	0.545	0.364	0.000137182	0	fkbp4
plekhg5a	5.45818e-09	0.61955	0.868	0.736	0.000137923	0	plekhg5a
MAGI3	5.64885e-09	1.59891	0.452	0.304	0.000142741	0	MAGI3
selenbp1	5.75562e-09	0.902774	0.8	0.668	0.000145439	0	selenbp1
si:ch211-235o23.1	5.84582e-09	0.884089	0.584	0.418	0.000147718	0	si:ch211-235o23.1
git1	6.08864e-09	0.600981	0.662	0.49	0.000153854	0	git1
gmnn	6.2291e-09	0.445629	0.756	0.567	0.000157403	0	gmnn
si:dkey-28e7.3	6.92604e-09	1.66408	0.379	0.219	0.000175014	0	si:dkey-28e7.3
ktn1	6.99158e-09	1.33799	0.605	0.418	0.00017667	0	ktn1
ncalda	7.03273e-09	0.389597	0.961	0.901	0.00017771	0	ncalda
anxa11b	7.05592e-09	0.679932	0.891	0.816	0.000178296	0	anxa11b
naca	7.10557e-09	0.421995	0.958	0.963	0.000179551	0	naca
hells	7.40332e-09	1.25685	0.501	0.332	0.000187074	0	hells
mylk5	7.55264e-09	0.833788	0.725	0.58	0.000190848	0	mylk5
anxa13	7.56454e-09	0.554134	0.948	0.931	0.000191148	0	anxa13
map4k2	7.58135e-09	0.68284	0.909	0.812	0.000191573	0	map4k2
sos1	7.64983e-09	1.0268	0.47	0.315	0.000193304	0	sos1
csrp1a	8.6869e-09	0.863143	0.862	0.744	0.000219509	0	csrp1a
CU459094.2	8.75543e-09	3.17064	0.377	0.223	0.000221241	0	CU459094.2
pcna	8.77301e-09	0.783835	0.842	0.713	0.000221685	0	pcna
ppp1r14ba	8.92422e-09	1.45844	0.413	0.252	0.000225506	0	ppp1r14ba
mapk3	9.75431e-09	0.813218	0.701	0.519	0.000246482	0	mapk3
actn4	1.03456e-08	1.02883	0.849	0.756	0.000261424	0	actn4
cpb1	1.1127e-08	0.317304	0.4	0.245	0.000281168	0	cpb1
h1-10	1.12099e-08	0.962279	0.94	0.887	0.000283262	0	h1-10
tinagl1	1.12254e-08	2.23643	0.192	0.078	0.000283654	0	tinagl1
pkp2	1.16505e-08	1.49897	0.335	0.189	0.000294396	0	pkp2
rapgef2	1.1789e-08	1.38313	0.584	0.426	0.000297895	0	rapgef2
tox2	1.24914e-08	1.29992	0.629	0.486	0.000315646	0	tox2
rereb	1.26237e-08	0.399444	0.579	0.399	0.000318988	0	rereb
larp6a	1.40485e-08	0.922525	0.551	0.375	0.000354992	0	larp6a
rapgef3	1.41095e-08	0.728165	0.348	0.198	0.000356533	0	rapgef3
kitlga	1.41175e-08	0.640965	0.46	0.292	0.000356736	0	kitlga
CABZ01027646.1	1.41799e-08	1.5241	0.358	0.203	0.000358313	0	CABZ01027646.1
perp	1.418e-08	0.568782	0.914	0.909	0.000358315	0	perp
cxcr4a	1.44856e-08	2.3576	0.551	0.372	0.000366036	0	cxcr4a
pitpnm3	1.45116e-08	0.403986	0.317	0.176	0.000366693	0	pitpnm3
romo1	1.49554e-08	0.425926	0.868	0.756	0.000377908	0	romo1
she	1.52671e-08	1.13457	0.616	0.455	0.000385784	0	she
zgc:91910	1.62852e-08	0.704513	0.644	0.48	0.000411511	0	zgc:91910
bcl6b	1.67633e-08	1.25858	0.717	0.574	0.000423591	0	bcl6b
oaz2b	1.68015e-08	1.31642	0.418	0.262	0.000424558	0	oaz2b
si:ch211-212g7.6	1.71355e-08	0.79271	0.701	0.533	0.000432996	0	si:ch211-212g7.6
gadd45gip1	1.95647e-08	1.20197	0.395	0.237	0.000494381	0	gadd45gip1
zgc:64106	2.00288e-08	1.00749	0.764	0.661	0.000506108	0	zgc:64106
nop53	2.16345e-08	0.63786	0.735	0.561	0.000546683	0	nop53
lpar2a	2.16778e-08	0.95761	0.512	0.351	0.000547777	0	lpar2a
lpar6a	2.185e-08	1.30157	0.571	0.416	0.000552127	0	lpar6a
ccm2l	2.20405e-08	0.197395	0.642	0.492	0.000556941	0	ccm2l
ehbp1l1b	2.2167e-08	0.504786	0.517	0.373	0.000560138	0	ehbp1l1b
cyp2aa4	2.32767e-08	0.940621	0.138	0.045	0.000588178	0	cyp2aa4
pinx1	2.44046e-08	2.38585	0.525	0.364	0.00061668	0	pinx1
lpcat2	2.48013e-08	2.27363	0.218	0.098	0.000626703	0	lpcat2
LRATD2	2.66752e-08	0.281671	0.766	0.661	0.000674057	0	LRATD2
ctnnal1	2.70287e-08	0.920632	0.281	0.144	0.000682989	0	ctnnal1
acvr2aa	3.0499e-08	1.34663	0.538	0.353	0.000770678	0	acvr2aa
vegfc	3.13216e-08	2.04168	0.405	0.256	0.000791465	0	vegfc
fnbp1l	3.30874e-08	0.89118	0.517	0.342	0.000836085	0	fnbp1l
setb	3.33444e-08	0.729524	0.81	0.708	0.000842579	0	setb
usf1l	3.33473e-08	0.339982	0.558	0.381	0.000842654	0	usf1l
hbegfa	3.36118e-08	1.3604	0.519	0.381	0.000849337	0	hbegfa
si:ch73-335l21.4	3.43932e-08	0.839262	0.712	0.552	0.000869081	0	si:ch73-335l21.4
cxcl12b	3.50533e-08	2.55498	0.535	0.375	0.000885761	0	cxcl12b
sox17	3.91716e-08	2.20251	0.296	0.165	0.000989827	0	sox17
smad9	4.02097e-08	0.598952	0.558	0.395	0.00101606	0	smad9
cavin1b	4.02172e-08	1.08798	0.673	0.512	0.00101625	0	cavin1b
gask1b	4.08948e-08	0.317659	0.795	0.651	0.00103337	0	gask1b
tnfrsf11a	4.43843e-08	2.7088	0.229	0.108	0.00112155	0	tnfrsf11a
vamp3	4.53345e-08	0.696951	0.849	0.771	0.00114556	0	vamp3
tmx1	4.80241e-08	0.271573	0.647	0.454	0.00121352	0	tmx1
creb3l3l	5.06721e-08	0.82778	0.738	0.579	0.00128043	0	creb3l3l
CT956002.2	5.14125e-08	0.399941	0.751	0.545	0.00129914	0	CT956002.2
cdc42se1	5.30114e-08	0.561829	0.631	0.456	0.00133954	0	cdc42se1
cyp2aa3	5.42749e-08	2.2803	0.104	0.027	0.00137147	0	cyp2aa3
atp5mc3b	5.43531e-08	0.458319	0.852	0.714	0.00137345	0	atp5mc3b
rock1	5.59514e-08	0.838403	0.457	0.29	0.00141383	0	rock1
anapc4	5.63299e-08	1.68868	0.221	0.102	0.0014234	0	anapc4
azin1a	5.74164e-08	2.74217	0.348	0.213	0.00145086	0	azin1a
psda	5.74502e-08	0.576078	0.244	0.117	0.00145171	0	psda
rbbp4	5.8564e-08	0.689134	0.59	0.431	0.00147985	0	rbbp4
scarb1	6.26578e-08	0.730521	0.839	0.733	0.0015833	0	scarb1
cops7a	6.52503e-08	0.728161	0.6	0.441	0.00164881	0	cops7a
rhbdd3	6.59657e-08	0.31253	0.353	0.202	0.00166689	0	rhbdd3
prickle1b	6.64571e-08	0.937756	0.574	0.413	0.0016793	0	prickle1b
itpk1a	7.12338e-08	4.23413	0.151	0.056	0.00180001	0	itpk1a
p2ry1	7.29271e-08	1.86122	0.283	0.15	0.0018428	0	p2ry1
hip1	7.67251e-08	0.721683	0.616	0.474	0.00193877	0	hip1
zp3e	7.71207e-08	0.34576	0.758	0.593	0.00194876	0	zp3e
cyp1a	7.767e-08	0.908041	0.896	0.856	0.00196264	0	cyp1a
ywhah	7.77369e-08	0.490012	0.639	0.448	0.00196433	0	ywhah
ece2b	7.91123e-08	1.43366	0.325	0.184	0.00199909	0	ece2b
gpx1a	7.92199e-08	0.908235	0.569	0.418	0.00200181	0	gpx1a
gpr156	8.26731e-08	1.11269	0.488	0.322	0.00208907	0	gpr156
ptprga	8.36081e-08	0.924936	0.564	0.405	0.00211269	0	ptprga
bnip3lb	8.52018e-08	0.572903	0.665	0.496	0.00215296	0	bnip3lb
trim35-10	8.69651e-08	0.83077	0.161	0.063	0.00219752	0	trim35-10
ttyh2l	9.30587e-08	2.1924	0.281	0.15	0.0023515	0	ttyh2l
si:dkey-165a24.9	9.37588e-08	1.42149	0.249	0.127	0.00236919	0	si:dkey-165a24.9
prr12b	9.37882e-08	0.296115	0.281	0.144	0.00236993	0	prr12b
efhd1	9.74953e-08	4.44734	0.153	0.059	0.00246361	0	efhd1
pknox2	9.75859e-08	1.01577	0.494	0.332	0.0024659	0	pknox2
CABZ01046949.1	9.77258e-08	0.702278	0.584	0.426	0.00246943	0	CABZ01046949.1
FAT4	1.10091e-07	0.410674	0.483	0.32	0.0027819	0	FAT4
cmtm6	1.12056e-07	0.578787	0.745	0.619	0.00283155	0	cmtm6
nkd2a	1.12067e-07	1.38372	0.325	0.185	0.00283182	0	nkd2a
si:dkey-90l23.1	1.13572e-07	0.330364	0.881	0.77	0.00286984	0	si:dkey-90l23.1
pard6gb	1.17617e-07	1.01634	0.571	0.395	0.00297206	0	pard6gb
khdrbs1b	1.179e-07	0.648721	0.699	0.523	0.00297921	0	khdrbs1b
st3gal3a	1.18461e-07	0.520086	0.844	0.732	0.00299338	0	st3gal3a
dock9b	1.1971e-07	0.386451	0.447	0.29	0.00302496	0	dock9b
osbpl3b	1.21354e-07	3.2982	0.231	0.114	0.00306649	0	osbpl3b
uhrf1	1.22191e-07	1.57267	0.483	0.324	0.00308765	0	uhrf1
irx3a	1.27035e-07	2.78567	0.286	0.166	0.00321005	0	irx3a
ANO7	1.27419e-07	4.40026	0.14	0.052	0.00321975	0	ANO7
tnfaip8l1	1.29135e-07	0.998582	0.543	0.398	0.00326312	0	tnfaip8l1
cyp2ad2	1.32003e-07	1.26906	0.455	0.309	0.00333559	0	cyp2ad2
LO017877.2	1.40079e-07	0.302258	0.797	0.628	0.00353964	0	LO017877.2
sulf1	1.41273e-07	4.63785	0.161	0.065	0.00356982	0	sulf1
itgb1b	1.42265e-07	0.698661	0.639	0.478	0.0035949	0	itgb1b
rad51	1.47125e-07	0.258499	0.382	0.234	0.00371769	0	rad51
fzd8b	1.56226e-07	5.53591	0.143	0.052	0.00394767	0	fzd8b
si:dkey-264d12.1	1.64003e-07	2.64862	0.122	0.04	0.00414418	0	si:dkey-264d12.1
phldb2b	1.64172e-07	0.457864	0.629	0.463	0.00414846	0	phldb2b
si:dkey-229d11.5	1.65628e-07	0.57962	0.909	0.819	0.00418525	0	si:dkey-229d11.5
znf703	1.68922e-07	0.610837	0.613	0.451	0.00426848	0	znf703
gsna	1.82278e-07	0.455569	0.694	0.535	0.00460597	0	gsna
arhgap27l	1.84312e-07	0.282737	0.725	0.56	0.00465738	0	arhgap27l
rab40b	1.86766e-07	1.30804	0.483	0.338	0.00471939	0	rab40b
elf2b	1.91203e-07	1.35987	0.579	0.437	0.0048315	0	elf2b
anapc2	1.91355e-07	0.241123	0.182	0.076	0.00483536	0	anapc2
notch1a	1.93344e-07	0.625154	0.722	0.568	0.00488562	0	notch1a
znf536	1.94401e-07	1.33419	0.242	0.125	0.00491231	0	znf536
tmem88b	2.03529e-07	0.52039	0.805	0.693	0.00514299	0	tmem88b
dcdc2b	2.11832e-07	3.56192	0.197	0.091	0.00535278	0	dcdc2b
fli1a	2.24588e-07	0.386766	0.969	0.96	0.00567511	0	fli1a
eif3ba	2.38244e-07	0.515611	0.891	0.798	0.00602019	0	eif3ba
h3f3b.1	2.48351e-07	0.384088	0.826	0.681	0.00627559	0	h3f3b.1
msl2b	2.4984e-07	0.960564	0.457	0.296	0.00631322	0	msl2b
CU927890.1	2.87793e-07	0.619269	0.883	0.793	0.00727224	0	CU927890.1
fen1	2.98497e-07	1.18577	0.512	0.345	0.00754272	0	fen1
ywhaqa	3.02509e-07	0.548337	0.787	0.629	0.0076441	0	ywhaqa
fam89b	3.09281e-07	0.737324	0.457	0.298	0.00781523	0	fam89b
sptbn1	3.1368e-07	0.584044	0.777	0.636	0.00792639	0	sptbn1
fam49bb	3.14697e-07	0.721855	0.506	0.361	0.00795208	0	fam49bb
baiap2b:1	3.16987e-07	0.95495	0.145	0.054	0.00800994	0	baiap2b:1
ints3	3.2766e-07	0.917401	0.608	0.446	0.00827965	0	ints3
ccnyl1	3.32706e-07	1.5254	0.382	0.241	0.00840714	0	ccnyl1
nap1l1	3.34975e-07	0.554174	0.831	0.708	0.00846447	0	nap1l1
inka1a	3.37272e-07	0.482528	0.532	0.342	0.00852252	0	inka1a
arhgap10	3.37694e-07	0.693676	0.571	0.431	0.00853318	0	arhgap10
ubr7	3.39129e-07	1.19003	0.545	0.394	0.00856944	0	ubr7
si:dkey-229d11.3	3.48298e-07	0.257958	0.896	0.815	0.00880115	0	si:dkey-229d11.3
myo1ca	3.50068e-07	0.983549	0.774	0.646	0.00884587	0	myo1ca
ranbp1	3.65808e-07	0.465873	0.79	0.651	0.00924359	0	ranbp1
prdx5	3.66177e-07	0.814944	0.777	0.606	0.00925292	0	prdx5
smpd2b	3.772e-07	1.82317	0.343	0.213	0.00953147	0	smpd2b
adsl	3.78649e-07	2.79802	0.429	0.272	0.00956808	0	adsl
arhgap29b	4.20194e-07	0.619964	0.712	0.559	0.0106179	0	arhgap29b
fam98a	4.34263e-07	2.09484	0.14	0.053	0.0109734	0	fam98a
tspan4a	4.41296e-07	0.62505	0.595	0.431	0.0111511	0	tspan4a
seta	4.49317e-07	0.544078	0.865	0.778	0.0113538	0	seta
selenoh	4.56707e-07	0.816798	0.569	0.428	0.0115405	0	selenoh
palm1a	4.66227e-07	0.713716	0.745	0.602	0.0117811	0	palm1a
jupa	4.70987e-07	0.510417	0.914	0.856	0.0119014	0	jupa
banf1	4.88012e-07	0.744506	0.753	0.619	0.0123316	0	banf1
thoc5	5.04747e-07	0.43528	0.335	0.193	0.0127544	0	thoc5
phf20l1	5.1115e-07	0.592604	0.395	0.253	0.0129162	0	phf20l1
gstr	5.17887e-07	0.458431	0.901	0.8	0.0130865	0	gstr
znf865	5.21689e-07	0.39467	0.582	0.441	0.0131826	0	znf865
rap1aa	5.42129e-07	0.611602	0.67	0.511	0.0136991	0	rap1aa
gng2	5.45039e-07	0.608682	0.696	0.561	0.0137726	0	gng2
sumo3b	5.52454e-07	1.08786	0.678	0.557	0.0139599	0	sumo3b
zgc:92140	5.63789e-07	1.22369	0.431	0.296	0.0142464	0	zgc:92140
eif4e2	5.64365e-07	1.70036	0.249	0.131	0.0142609	0	eif4e2
si:dkey-253i9.4	5.92437e-07	1.08544	0.504	0.35	0.0149703	0	si:dkey-253i9.4
or133-6	5.9586e-07	2.36647	0.075	0.016	0.0150568	0	or133-6
zmp:0000000729	6.02036e-07	1.69961	0.174	0.079	0.0152129	0	zmp:0000000729
lig1	6.02048e-07	0.532818	0.462	0.298	0.0152131	0	lig1
DOCK9	6.0425e-07	1.0554	0.556	0.421	0.0152688	0	DOCK9
dgkza	6.10356e-07	1.15382	0.519	0.377	0.0154231	0	dgkza
letm2	6.19858e-07	0.320515	0.631	0.455	0.0156632	0	letm2
esama	6.34506e-07	0.455195	0.899	0.85	0.0160333	0	esama
dnajc8	6.38325e-07	0.415174	0.538	0.377	0.0161298	0	dnajc8
jpt1b	6.68932e-07	0.397248	0.831	0.681	0.0169032	0	jpt1b
prpf40a	6.69038e-07	1.09911	0.506	0.361	0.0169059	0	prpf40a
si:ch211-156b7.4	6.7217e-07	1.64936	0.392	0.256	0.0169851	0	si:ch211-156b7.4
znf346	7.16178e-07	0.616717	0.54	0.377	0.0180971	0	znf346
gins2	7.24817e-07	1.65298	0.242	0.127	0.0183154	0	gins2
mknk2a	7.3691e-07	1.62643	0.392	0.255	0.018621	0	mknk2a
prpf4bb	7.79822e-07	1.38404	0.397	0.257	0.0197053	0	prpf4bb
smu1a	7.88837e-07	0.583513	0.621	0.448	0.0199331	0	smu1a
hdac8	7.8938e-07	0.661506	0.319	0.184	0.0199468	0	hdac8
pygb	7.99027e-07	1.28048	0.257	0.139	0.0201906	0	pygb
si:dkeyp-73d8.8	8.12238e-07	0.961193	0.148	0.059	0.0205244	0	si:dkeyp-73d8.8
sh3bp4	8.23335e-07	0.788369	0.564	0.411	0.0208048	0	sh3bp4
ssrp1a	8.25266e-07	1.24962	0.421	0.281	0.0208537	0	ssrp1a
adssl	8.30025e-07	1.1549	0.634	0.503	0.0209739	0	adssl
trim35-31	8.30599e-07	2.9094	0.127	0.048	0.0209884	0	trim35-31
uqcrc2a	8.55173e-07	0.630058	0.587	0.429	0.0216094	0	uqcrc2a
sephs2	8.75429e-07	0.330312	0.436	0.278	0.0221212	0	sephs2
cyp2aa11	8.81089e-07	0.600867	0.226	0.116	0.0222642	0	cyp2aa11
her9	8.89433e-07	1.04824	0.496	0.346	0.0224751	0	her9
iba57	8.89632e-07	0.880558	0.348	0.208	0.0224801	0	iba57
rcvrn2	9.04437e-07	6.64253	0.062	0.011	0.0228542	0	rcvrn2
exoc3l1	9.38008e-07	0.528734	0.826	0.703	0.0237025	0	exoc3l1
zdhhc13	9.65206e-07	0.680781	0.416	0.262	0.0243898	0	zdhhc13
hnrnpul1	9.66829e-07	0.486253	0.478	0.313	0.0244308	0	hnrnpul1
vamp8	9.67627e-07	2.17562	0.286	0.172	0.024451	0	vamp8
rbbp5	9.9469e-07	0.307006	0.46	0.301	0.0251348	0	rbbp5
sox13	1.00566e-06	0.749629	0.569	0.422	0.025412	0	sox13
crybg1a	1.02642e-06	0.749276	0.566	0.406	0.0259365	0	crybg1a
smarcad1a	1.0401e-06	0.868576	0.291	0.166	0.0262822	0	smarcad1a
[truncated: 2,321 more rows]
