# Supplementary material
Source: Research Square preprint supplement (doi:10.21203/rs.3.rs-5333191/v1)
Supplement: Supplementary file 4 [file fe668b24b8cc1e9cb51f106b.xlsx]

## Sheet: tab.go_DEG_Multi36_cluster0
36 hpf cl 0	ID	Description	GeneRatio	BgRatio	pvalue	p.adjust	qvalue	geneID	Count
GO:0001568	GO:0001568	blood vessel development	24/223	495/18569	7.15464e-09	9.58007e-06	8.57804e-06	stab2/hexb/thbs1b/dab2/nrp2a/ctsz/mtmr8/cxcl12b/prcp/flt4/aplnra/snx5/nr2f2/nrp2b/tek/abca1a/hhex/gas6/cpn1/calcrlb/aplnrb/tspan18b/lmo2/hsp90ab1	24
GO:0001945	GO:0001945	lymph vessel development	10/223	76/18569	2.43709e-08	1.63163e-05	1.46097e-05	cxcl12a/stab2/mafba/sele/flt4/aplnra/stab1/nr2f2/mmp2/hhex	10
GO:0036303	GO:0036303	lymph vessel morphogenesis	8/223	52/18569	1.82286e-07	7.08079e-05	6.34017e-05	cxcl12a/stab2/mafba/sele/flt4/stab1/nr2f2/hhex	8
GO:0006898	GO:0006898	receptor-mediated endocytosis	10/223	95/18569	2.11525e-07	7.08079e-05	6.34017e-05	mrc1b/stab2/mrc1a/dab2/cltca/stab1/clta/ppt1/arrb2b/ap2m1a	10
GO:0001525	GO:0001525	angiogenesis	18/223	353/18569	2.85267e-07	7.63945e-05	6.8404e-05	hexb/thbs1b/dab2/nrp2a/ctsz/cxcl12b/prcp/flt4/aplnra/nrp2b/tek/abca1a/hhex/gas6/cpn1/calcrlb/aplnrb/tspan18b	18
GO:0048514	GO:0048514	blood vessel morphogenesis	20/223	439/18569	3.71299e-07	8.28615e-05	7.41946e-05	hexb/thbs1b/dab2/nrp2a/ctsz/cxcl12b/prcp/flt4/aplnra/snx5/nrp2b/tek/abca1a/hhex/gas6/cpn1/calcrlb/aplnrb/tspan18b/lmo2	20
GO:0001946	GO:0001946	lymphangiogenesis	7/223	50/18569	2.11186e-06	0.000403968	0.000361715	cxcl12a/stab2/mafba/flt4/stab1/nr2f2/hhex	7
GO:0006897	GO:0006897	endocytosis	15/223	320/18569	7.98089e-06	0.0013358	0.00119608	mrc1b/stab2/mrc1a/dab2/myo7aa/cltca/stab1/snx5/snx9a/tpte/ap1b1/clta/ppt1/arrb2b/ap2m1a	15
GO:0001667	GO:0001667	ameboidal-type cell migration	13/223	252/18569	1.18261e-05	0.00175946	0.00157543	cxcl12a/celsr1b/nrp2a/col18a1a/cxcl12b/prcp/flt4/aplnra/nrp2b/tek/fzd7a/aplnrb/lmo2	13
GO:1901136	GO:1901136	carbohydrate derivative catabolic process	10/223	153/18569	1.63969e-05	0.00219554	0.0019659	gnpda1/hexb/fuca1.1/npl/amdhd2/fuca2/hexa/naga/eno3/pde4ba	10
GO:0098657	GO:0098657	import into cell	17/223	457/18569	3.98368e-05	0.00484922	0.00434202	mrc1b/stab2/mrc1a/dab2/myo7aa/slc9a7/cltca/stab1/atp1b1a/snx5/snx9a/tpte/ap1b1/clta/ppt1/arrb2b/ap2m1a	17
GO:0002040	GO:0002040	sprouting angiogenesis	9/223	144/18569	6.18475e-05	0.00690115	0.00617932	cxcl12b/flt4/aplnra/abca1a/hhex/gas6/cpn1/aplnrb/tspan18b	9
GO:0006412	GO:0006412	translation	16/223	454/18569	0.00012622	0.0130006	0.0116408	bzw1b/eif4ebp1/dap1b/rpl3/rpl36/eef2b/rpl26/rpl23/rpl23a/rpl13/rpl6/rpl4/eef1a1l1/rps28/rps2/rpsa	16
GO:0043043	GO:0043043	peptide biosynthetic process	16/223	460/18569	0.000146679	0.0140288	0.0125614	bzw1b/eif4ebp1/dap1b/rpl3/rpl36/eef2b/rpl26/rpl23/rpl23a/rpl13/rpl6/rpl4/eef1a1l1/rps28/rps2/rpsa	16
GO:0006054	GO:0006054	N-acetylneuraminate metabolic process	3/223	10/18569	0.000192683	0.0161251	0.0144385	gnpda1/npl/amdhd2	3
GO:0046348	GO:0046348	amino sugar catabolic process	3/223	10/18569	0.000192683	0.0161251	0.0144385	gnpda1/npl/amdhd2	3
GO:0001935	GO:0001935	endothelial cell proliferation	5/223	46/18569	0.00021924	0.0165823	0.0148478	aplnra/nr2f1a/tek/aplnrb/lmo2	5
GO:0005975	GO:0005975	carbohydrate metabolic process	13/223	336/18569	0.000222913	0.0165823	0.0148478	gnpda1/hexb/fuca1.1/npl/akr1a1b/man2b1/amdhd2/fuca2/hexa/man2a1/galm/naga/eno3	13
GO:0043542	GO:0043542	endothelial cell migration	5/223	49/18569	0.000296215	0.0208754	0.0186919	cxcl12b/prcp/flt4/tek/lmo2	5
GO:0051094	GO:0051094	positive regulation of developmental process	11/223	269/18569	0.000425793	0.0272149	0.0243684	tfec/cxcl12a/stab2/dab2/gdpd5b/swap70b/aplnra/stab1/tek/hhex/aplnrb	11
GO:0000727	GO:0000727	double-strand break repair via break-induced replication	3/223	13/18569	0.000447146	0.0272149	0.0243684	mcm4/mcm2/mcm5	3
GO:1900107	GO:1900107	regulation of nodal signaling pathway	3/223	13/18569	0.000447146	0.0272149	0.0243684	aplnra/dact2/aplnrb	3
GO:0019318	GO:0019318	hexose metabolic process	6/223	83/18569	0.000490163	0.028536	0.0255513	fuca1.1/akr1a1b/man2b1/fuca2/man2a1/galm	6
GO:0006040	GO:0006040	amino sugar metabolic process	4/223	32/18569	0.000559164	0.0302114	0.0270514	gnpda1/npl/amdhd2/uap1l1	4
GO:0045744	GO:0045744	negative regulation of G protein-coupled receptor signaling pathway	3/223	14/18569	0.000564066	0.0302114	0.0270514	aplnra/aplnrb/arrb2b	3
GO:0030947	GO:0030947	regulation of vascular endothelial growth factor receptor signaling pathway	3/223	15/18569	0.000698855	0.0352613	0.0315731	nrp2a/flt4/nrp2b	3
GO:1902600	GO:1902600	proton transmembrane transport	6/223	89/18569	0.000711019	0.0352613	0.0315731	slc9a7/atp6v1f/atp6v1e1b/atp6v1ba/hvcn1/atp6v0e1	6
GO:0043534	GO:0043534	blood vessel endothelial cell migration	4/223	35/18569	0.000791583	0.0368241	0.0329724	cxcl12b/prcp/flt4/lmo2	4
GO:0001570	GO:0001570	vasculogenesis	5/223	61/18569	0.000822486	0.0368241	0.0329724	nrp2a/cxcl12b/aplnra/nrp2b/aplnrb	5
GO:0005996	GO:0005996	monosaccharide metabolic process	6/223	92/18569	0.000846913	0.0368241	0.0329724	fuca1.1/akr1a1b/man2b1/fuca2/man2a1/galm	6
GO:1901658	GO:1901658	glycosyl compound catabolic process	3/223	16/18569	0.000852536	0.0368241	0.0329724	fuca1.1/fuca2/naga	3
GO:0006886	GO:0006886	intracellular protein transport	13/223	389/18569	0.000886678	0.0371019	0.0332213	pxk/snx8a/snx2/lamp2/cltca/exoc6/snx9a/ap1b1/clta/sh3tc2/arl4aa/rab1ab/ap2m1a	13
GO:0010631	GO:0010631	epithelial cell migration	5/223	63/18569	0.000953102	0.0381648	0.034173	cxcl12b/prcp/flt4/tek/lmo2	5
GO:0042255	GO:0042255	ribosome assembly	4/223	37/18569	0.000979933	0.0381648	0.034173	rpl23a/rpl6/rps28/rpsa	4
GO:0002181	GO:0002181	cytoplasmic translation	5/223	64/18569	0.00102391	0.0381648	0.034173	rpl36/rpl26/rpl6/rps28/rpsa	5
GO:0032925	GO:0032925	regulation of activin receptor signaling pathway	3/223	17/18569	0.00102609	0.0381648	0.034173	aplnra/dact2/aplnrb	3
GO:0051453	GO:0051453	regulation of intracellular pH	4/223	38/18569	0.00108501	0.0392656	0.0351586	cxcl12a/slc9a7/cxcl12b/atp6v1ba	4
GO:0038084	GO:0038084	vascular endothelial growth factor signaling pathway	3/223	18/18569	0.00122045	0.0425374	0.0380882	nrp2a/flt4/nrp2b	3
GO:0090132	GO:0090132	epithelium migration	5/223	67/18569	0.00125981	0.0425374	0.0380882	cxcl12b/prcp/flt4/tek/lmo2	5
GO:0006873	GO:0006873	intracellular monoatomic ion homeostasis	9/223	218/18569	0.00131641	0.0425374	0.0380882	cxcl12a/slc9a7/cxcl12b/aplnra/atp1b1a/atp6v1ba/aplnrb/fthl27/fthl31	9
GO:0030003	GO:0030003	intracellular monoatomic cation homeostasis	9/223	218/18569	0.00131641	0.0425374	0.0380882	cxcl12a/slc9a7/cxcl12b/aplnra/atp1b1a/atp6v1ba/aplnrb/fthl27/fthl31	9
GO:0048878	GO:0048878	chemical homeostasis	13/223	407/18569	0.00133426	0.0425374	0.0380882	cxcl12a/stab2/akr1a1b/slc9a7/cxcl12b/aplnra/bloc1s1/stab1/atp1b1a/atp6v1ba/aplnrb/fthl27/fthl31	13
GO:0030641	GO:0030641	regulation of cellular pH	4/223	41/18569	0.00144736	0.04507	0.0403559	cxcl12a/slc9a7/cxcl12b/atp6v1ba	4
GO:0030335	GO:0030335	positive regulation of cell migration	6/223	103/18569	0.001523	0.045634	0.0408609	cxcl12a/adam8a/cxcl12b/flt4/plvapb/tek	6
GO:0050673	GO:0050673	epithelial cell proliferation	5/223	70/18569	0.00153363	0.045634	0.0408609	aplnra/nr2f1a/tek/aplnrb/lmo2	5
GO:0032392	GO:0032392	DNA geometric change	3/223	20/18569	0.00167513	0.0477235	0.0427318	mcm4/mcm2/mcm5	3
GO:0032508	GO:0032508	DNA duplex unwinding	3/223	20/18569	0.00167513	0.0477235	0.0427318	mcm4/mcm2/mcm5	3
GO:0042246	GO:0042246	tissue regeneration	7/223	144/18569	0.0017953	0.049614	0.0444246	lgmn/cxcl12a/ctsba/flt4/atp6v1e1b/lmo2/lfng	7
GO:0035924	GO:0035924	cellular response to vascular endothelial growth factor stimulus	3/223	21/18569	0.00193712	0.049614	0.0444246	nrp2a/flt4/nrp2b	3
GO:0038092	GO:0038092	nodal signaling pathway	3/223	21/18569	0.00193712	0.049614	0.0444246	aplnra/dact2/aplnrb	3
GO:0048738	GO:0048738	cardiac muscle tissue development	6/223	108/18569	0.00193996	0.049614	0.0444246	dab2/aplnra/nr2f1a/nr2f2/npr1a/aplnrb	6
GO:0008283	GO:0008283	cell population proliferation	13/223	425/18569	0.00195612	0.049614	0.0444246	tfec/cxcl12a/ptpn11b/aplnra/nr2f1a/slc35f6/atp6v1f/tek/npr1a/fzd7a/aplnrb/mcm5/lmo2	13
GO:0090130	GO:0090130	tissue migration	5/223	74/18569	0.00196381	0.049614	0.0444246	cxcl12b/prcp/flt4/tek/lmo2	5
GO:0006885	GO:0006885	regulation of pH	4/223	45/18569	0.0020513	0.0508647	0.0455445	cxcl12a/slc9a7/cxcl12b/atp6v1ba	4
GO:0014706	GO:0014706	striated muscle tissue development	6/223	110/18569	0.00212894	0.0509044	0.0455801	dab2/aplnra/nr2f1a/nr2f2/npr1a/aplnrb	6
GO:2000147	GO:2000147	positive regulation of cell motility	6/223	110/18569	0.00212894	0.0509044	0.0455801	cxcl12a/adam8a/cxcl12b/flt4/plvapb/tek	6
GO:0055082	GO:0055082	intracellular chemical homeostasis	9/223	240/18569	0.00253535	0.0595586	0.0533291	cxcl12a/slc9a7/cxcl12b/aplnra/atp1b1a/atp6v1ba/aplnrb/fthl27/fthl31	9
GO:0040017	GO:0040017	positive regulation of locomotion	6/223	115/18569	0.00266212	0.0614583	0.0550301	cxcl12a/adam8a/cxcl12b/flt4/plvapb/tek	6
GO:0060041	GO:0060041	retina development in camera-type eye	10/223	291/18569	0.002808	0.0630213	0.0564296	atoh8/mafba/snx5/ctsd/atp6v1f/atp6v1e1b/mmp2/mcm2/atp6v0e1/lmo2	10
GO:0006270	GO:0006270	DNA replication initiation	3/223	24/18569	0.00287085	0.0630213	0.0564296	mcm4/mcm2/mcm5	3
GO:0048589	GO:0048589	developmental growth	12/223	392/18569	0.00287102	0.0630213	0.0564296	lgmn/cxcl12a/tmem59l/gdpd5b/ctsba/flt4/swap70b/atp6v1e1b/npr1a/hhex/lmo2/lfng	12
GO:0042074	GO:0042074	cell migration involved in gastrulation	5/223	82/18569	0.00307925	0.0665019	0.0595462	cxcl12a/celsr1b/cxcl12b/aplnra/fzd7a	5
GO:0045446	GO:0045446	endothelial cell differentiation	4/223	51/18569	0.00325325	0.0691445	0.0619124	stab2/flt4/nr2f2/hhex	4
GO:0019725	GO:0019725	cellular homeostasis	10/223	298/18569	0.00332612	0.0695886	0.06231	cxcl12a/slc9a7/cxcl12b/aplnra/atp1b1a/atp6v1ba/aplnrb/fthl27/prdx2/fthl31	10
GO:0019933	GO:0019933	cAMP-mediated signaling	3/223	26/18569	0.00362339	0.0724136	0.0648395	aplnra/aplnrb/pde4ba	3
GO:0048010	GO:0048010	vascular endothelial growth factor receptor signaling pathway	3/223	26/18569	0.00362339	0.0724136	0.0648395	nrp2a/flt4/nrp2b	3
GO:0048857	GO:0048857	neural nucleus development	3/223	26/18569	0.00362339	0.0724136	0.0648395	cxcl12a/mafba/cxcl12b	3
GO:0010952	GO:0010952	positive regulation of peptidase activity	4/223	53/18569	0.00374171	0.0736788	0.0659723	ctsh/zgc:110239/ctsla/pycard	4
GO:0048794	GO:0048794	swim bladder development	3/223	27/18569	0.00404056	0.0784102	0.0702089	atoh8/bloc1s1/elovl1b	3
GO:0031101	GO:0031101	fin regeneration	5/223	88/18569	0.00417296	0.0786984	0.070467	cxcl12a/ctsba/atp6v1e1b/lmo2/lfng	5
GO:0045862	GO:0045862	positive regulation of proteolysis	5/223	88/18569	0.00417296	0.0786984	0.070467	adam8a/ctsh/zgc:110239/ctsla/pycard	5
GO:0055080	GO:0055080	monoatomic cation homeostasis	9/223	260/18569	0.00429785	0.0799282	0.0715681	cxcl12a/slc9a7/cxcl12b/aplnra/atp1b1a/atp6v1ba/aplnrb/fthl27/fthl31	9
GO:0016197	GO:0016197	endosomal transport	7/223	169/18569	0.00438223	0.0803808	0.0719734	pxk/rab11fip3/snx8a/snx1a/bloc1s1/snx5/snx9a	7
GO:0045765	GO:0045765	regulation of angiogenesis	5/223	90/18569	0.00459224	0.0830948	0.0744035	thbs1b/aplnra/tek/aplnrb/tspan18b	5
GO:0090092	GO:0090092	regulation of transmembrane receptor protein serine/threonine kinase signaling pathway	6/223	129/18569	0.00468865	0.0837081	0.0749526	dab2/aplnra/dact2/mmp2/aplnrb/hsp90ab1	6
GO:0040007	GO:0040007	growth	12/223	418/18569	0.00478592	0.0843204	0.0755009	lgmn/cxcl12a/tmem59l/gdpd5b/ctsba/flt4/swap70b/atp6v1e1b/npr1a/hhex/lmo2/lfng	12
GO:0071103	GO:0071103	DNA conformation change	3/223	29/18569	0.00495951	0.086244	0.0772233	mcm4/mcm2/mcm5	3
GO:0031329	GO:0031329	regulation of cellular catabolic process	8/223	219/18569	0.00507175	0.087065	0.0779585	adam8a/tent5ab/zfp36l1a/carhsp1/dram2b/snx4/dap1b/zfp36l1b	8
GO:2001235	GO:2001235	positive regulation of apoptotic signaling pathway	3/223	31/18569	0.00599465	0.0966567	0.0865469	ctsh/zgc:110239/ctsla	3
GO:0006689	GO:0006689	ganglioside catabolic process	2/223	10/18569	0.0060636	0.0966567	0.0865469	hexb/hexa	2
GO:0050932	GO:0050932	regulation of pigment cell differentiation	2/223	10/18569	0.0060636	0.0966567	0.0865469	tfec/hipk2	2
GO:0051238	GO:0051238	sequestering of metal ion	2/223	10/18569	0.0060636	0.0966567	0.0865469	fthl27/fthl31	2
GO:0061158	GO:0061158	3'-UTR-mediated mRNA destabilization	2/223	10/18569	0.0060636	0.0966567	0.0865469	zfp36l1a/zfp36l1b	2
GO:1900151	GO:1900151	regulation of nuclear-transcribed mRNA catabolic process, deadenylation-dependent decay	2/223	10/18569	0.0060636	0.0966567	0.0865469	zfp36l1a/zfp36l1b	2
GO:0050801	GO:0050801	monoatomic ion homeostasis	9/223	276/18569	0.00630043	0.0992503	0.0888692	cxcl12a/slc9a7/cxcl12b/aplnra/atp1b1a/atp6v1ba/aplnrb/fthl27/fthl31	9
GO:0019935	GO:0019935	cyclic-nucleotide-mediated signaling	3/223	32/18569	0.00655695	0.099988	0.0895298	aplnra/aplnrb/pde4ba	3
GO:0045766	GO:0045766	positive regulation of angiogenesis	3/223	32/18569	0.00655695	0.099988	0.0895298	aplnra/tek/aplnrb	3
GO:1901342	GO:1901342	regulation of vasculature development	5/223	98/18569	0.00657128	0.099988	0.0895298	thbs1b/aplnra/tek/aplnrb/tspan18b	5
GO:0032924	GO:0032924	activin receptor signaling pathway	3/223	33/18569	0.00714961	0.10637	0.0952445	aplnra/dact2/aplnrb	3
GO:1904018	GO:1904018	positive regulation of vasculature development	3/223	33/18569	0.00714961	0.10637	0.0952445	aplnra/tek/aplnrb	3
GO:0051928	GO:0051928	positive regulation of calcium ion transport	2/223	11/18569	0.00735271	0.107259	0.0960399	aplnra/aplnrb	2
GO:0045595	GO:0045595	regulation of cell differentiation	13/223	498/18569	0.00736952	0.107259	0.0960399	tfec/lgmn/cxcl12a/atoh8/dab2/gdpd5b/hipk2/mafbb/swap70b/cdca7a/gpr182/hhex/lfng	13
GO:0051651	GO:0051651	maintenance of location in cell	4/223	66/18569	0.00816227	0.117146	0.104893	aplnra/aplnrb/fthl27/fthl31	4
GO:0009894	GO:0009894	regulation of catabolic process	9/223	288/18569	0.00822384	0.117146	0.104893	adam8a/tent5ab/zfp36l1a/carhsp1/dram2b/snx4/dap1b/zfp36l1b/hsp90ab1	9
GO:0003158	GO:0003158	endothelium development	4/223	67/18569	0.00860053	0.119606	0.107096	stab2/flt4/nr2f2/hhex	4
GO:0006044	GO:0006044	N-acetylglucosamine metabolic process	2/223	12/18569	0.00875385	0.119606	0.107096	gnpda1/amdhd2	2
GO:0032367	GO:0032367	intracellular cholesterol transport	2/223	12/18569	0.00875385	0.119606	0.107096	stab2/stab1	2
GO:0060035	GO:0060035	notochord cell development	2/223	12/18569	0.00875385	0.119606	0.107096	atp6v1f/atp6v1e1b	2
GO:0002011	GO:0002011	morphogenesis of an epithelial sheet	5/223	107/18569	0.00943723	0.127641	0.11429	tfec/ctsba/cyth3a/aplnra/fzd7a	5
GO:0006665	GO:0006665	sphingolipid metabolic process	5/223	108/18569	0.00980117	0.129938	0.116347	hexb/hexa/elovl1b/psap/sptlc2a	5
GO:0015850	GO:0015850	organic hydroxy compound transport	5/223	108/18569	0.00980117	0.129938	0.116347	slco2b1/stab2/stab1/aqp7/abca1a	5
GO:0001938	GO:0001938	positive regulation of endothelial cell proliferation	2/223	13/18569	0.0102642	0.130892	0.117202	aplnra/aplnrb	2
GO:0035701	GO:0035701	hematopoietic stem cell migration	2/223	13/18569	0.0102642	0.130892	0.117202	cxcl12a/mmp2	2
GO:0097006	GO:0097006	regulation of plasma lipoprotein particle levels	2/223	13/18569	0.0102642	0.130892	0.117202	stab2/stab1	2
GO:1902969	GO:1902969	mitotic DNA replication	2/223	13/18569	0.0102642	0.130892	0.117202	mcm4/mcm2	2
GO:0097190	GO:0097190	apoptotic signaling pathway	6/223	157/18569	0.0118304	0.1473	0.131894	hipk2/ctsh/zgc:110239/slc35f6/ctsla/dap1b	6
GO:0000028	GO:0000028	ribosomal small subunit assembly	2/223	14/18569	0.0118808	0.1473	0.131894	rps28/rpsa	2
GO:0060837	GO:0060837	blood vessel endothelial cell differentiation	2/223	14/18569	0.0118808	0.1473	0.131894	stab2/nr2f2	2
GO:0052652	GO:0052652	cyclic purine nucleotide metabolic process	3/223	42/18569	0.0139042	0.170325	0.15251	adcy7/npr1a/pde4ba	3
GO:0031099	GO:0031099	regeneration	7/223	211/18569	0.0139923	0.170325	0.15251	lgmn/cxcl12a/ctsba/flt4/atp6v1e1b/lmo2/lfng	7
GO:0030301	GO:0030301	cholesterol transport	3/223	43/18569	0.0148171	0.17737	0.158818	stab2/stab1/abca1a	3
GO:0000027	GO:0000027	ribosomal large subunit assembly	2/223	16/18569	0.0154224	0.17737	0.158818	rpl23a/rpl6	2
GO:0019377	GO:0019377	glycolipid catabolic process	2/223	16/18569	0.0154224	0.17737	0.158818	hexb/hexa	2
GO:0032366	GO:0032366	intracellular sterol transport	2/223	16/18569	0.0154224	0.17737	0.158818	stab2/stab1	2
GO:0032526	GO:0032526	response to retinoic acid	2/223	16/18569	0.0154224	0.17737	0.158818	nr2f5/rxraa	2
GO:0046479	GO:0046479	glycosphingolipid catabolic process	2/223	16/18569	0.0154224	0.17737	0.158818	hexb/hexa	2
GO:0090287	GO:0090287	regulation of cellular response to growth factor stimulus	6/223	167/18569	0.0156346	0.17737	0.158818	dab2/nrp2a/flt4/nrp2b/mmp2/hsp90ab1	6
GO:0090504	GO:0090504	epiboly	4/223	80/18569	0.01574	0.17737	0.158818	ctsba/cyth3a/aplnra/fzd7a	4
GO:0009187	GO:0009187	cyclic nucleotide metabolic process	3/223	44/18569	0.0157633	0.17737	0.158818	adcy7/npr1a/pde4ba	3
GO:0051247	GO:0051247	positive regulation of protein metabolic process	8/223	270/18569	0.0166065	0.185277	0.165898	crlf1b/adam8a/ctsh/zgc:110239/aplnra/ctsla/aplnrb/pycard	8
GO:1901657	GO:1901657	glycosyl compound metabolic process	3/223	45/18569	0.0167427	0.185277	0.165898	fuca1.1/fuca2/naga	3
GO:0030162	GO:0030162	regulation of proteolysis	6/223	170/18569	0.0169238	0.185746	0.166318	adam8a/ctsh/zgc:110239/ctsla/pycard/hsp90ab1	6
GO:0033260	GO:0033260	nuclear DNA replication	2/223	17/18569	0.0173419	0.185766	0.166336	mcm4/mcm2	2
GO:0035476	GO:0035476	angioblast cell migration	2/223	17/18569	0.0173419	0.185766	0.166336	aplnra/aplnrb	2
GO:1901071	GO:1901071	glucosamine-containing compound metabolic process	2/223	17/18569	0.0173419	0.185766	0.166336	gnpda1/amdhd2	2
GO:2001233	GO:2001233	regulation of apoptotic signaling pathway	4/223	83/18569	0.0177904	0.189059	0.169284	ctsh/zgc:110239/slc35f6/ctsla	4
GO:0022603	GO:0022603	regulation of anatomical structure morphogenesis	9/223	330/18569	0.018586	0.190724	0.170775	cxcl12a/stab2/thbs1b/aplnra/stab1/atp6v1f/tek/aplnrb/tspan18b	9
GO:0007369	GO:0007369	gastrulation	8/223	276/18569	0.0186867	0.190724	0.170775	cxcl12a/celsr1b/cyth3a/cxcl12b/swap70b/aplnra/fzd7a/aplnrb	8
GO:0008277	GO:0008277	regulation of G protein-coupled receptor signaling pathway	3/223	47/18569	0.0188018	0.190724	0.170775	aplnra/aplnrb/arrb2b	3
GO:0015918	GO:0015918	sterol transport	3/223	47/18569	0.0188018	0.190724	0.170775	stab2/stab1/abca1a	3
GO:0039019	GO:0039019	pronephric nephron development	3/223	47/18569	0.0188018	0.190724	0.170775	bnc2/mafba/kirrel3l	3
GO:0042147	GO:0042147	retrograde transport, endosome to Golgi	3/223	47/18569	0.0188018	0.190724	0.170775	snx8a/snx1a/snx5	3
GO:0050918	GO:0050918	positive chemotaxis	2/223	18/18569	0.0193571	0.194881	0.174497	cxcl12a/cxcl12b	2
GO:0031290	GO:0031290	retinal ganglion cell axon guidance	3/223	48/18569	0.0198816	0.198667	0.177888	cxcl12a/cxcl12b/mmp2	3
GO:0045597	GO:0045597	positive regulation of cell differentiation	6/223	179/18569	0.0212272	0.206778	0.18515	tfec/cxcl12a/dab2/gdpd5b/swap70b/hhex	6
GO:0030334	GO:0030334	regulation of cell migration	7/223	230/18569	0.0213801	0.206778	0.18515	cxcl12a/adam8a/cxcl12b/prcp/flt4/plvapb/tek	7
GO:0044786	GO:0044786	cell cycle DNA replication	2/223	19/18569	0.0214654	0.206778	0.18515	mcm4/mcm2	2
GO:0050921	GO:0050921	positive regulation of chemotaxis	2/223	19/18569	0.0214654	0.206778	0.18515	cxcl12a/cxcl12b	2
GO:0060841	GO:0060841	venous blood vessel development	2/223	19/18569	0.0214654	0.206778	0.18515	flt4/nr2f2	2
GO:0001936	GO:0001936	regulation of endothelial cell proliferation	2/223	20/18569	0.0236643	0.220045	0.197029	aplnra/aplnrb	2
GO:0010594	GO:0010594	regulation of endothelial cell migration	2/223	20/18569	0.0236643	0.220045	0.197029	prcp/tek	2
GO:0046514	GO:0046514	ceramide catabolic process	2/223	20/18569	0.0236643	0.220045	0.197029	hexb/hexa	2
GO:0048538	GO:0048538	thymus development	2/223	20/18569	0.0236643	0.220045	0.197029	cdca7a/mcm2	2
GO:0050974	GO:0050974	detection of mechanical stimulus involved in sensory perception	2/223	20/18569	0.0236643	0.220045	0.197029	myo7aa/ap1b1	2

## Sheet: tab.go_DEG_Multi36_cluster1
36 hpf cl 1	ID	Description	GeneRatio	BgRatio	pvalue	p.adjust	qvalue	geneID	Count
GO:0048514	GO:0048514	blood vessel morphogenesis	56/577	439/18569	1.74869e-19	3.68274e-16	2.81815e-16	slc2a1a/slc2a1b/cxcr4a/adgrb1a/flt1/hdac9b/hey2/pgfb/dll4/pdgfba/efnb2a/igfbp7/nrp1b/hlx1/egfra/sox7/hspg2/apln/lpar2a/wnk1a/arhgap18/lama4/sema3ab/hif1ab/git1/ackr3b/arhgef9b/robo4/dlc/kdrl/sdf4/pald1a/perp/pkma/gsk3ba/notch1b/lpar6a/arhgef7b/gata2a/sh3kbp1/acvrl1/rab11a/ets1/mcamb/esama/amotl2a/sox18/gng2/cdh5/wwtr1/kdr/plk2b/rasip1/ramp2/smad5/cdc42	56
GO:0001568	GO:0001568	blood vessel development	59/577	495/18569	4.98092e-19	5.24491e-16	4.01357e-16	slc2a1a/slc2a1b/cxcr4a/adgrb1a/flt1/hdac9b/hey2/pgfb/dll4/pdgfba/itga4/efnb2a/igfbp7/nrp1b/hlx1/egfra/sox7/hspg2/apln/lpar2a/wnk1a/arhgap18/lama4/sema3ab/hif1ab/git1/ackr3b/arhgef9b/robo4/dlc/kdrl/sdf4/pald1a/perp/pkma/gsk3ba/itgb1b/notch1b/lpar6a/arhgef7b/gata2a/sh3kbp1/acvrl1/rab11a/ets1/mcamb/esama/amotl2a/sox18/gng2/cdh5/pak2a/wwtr1/kdr/plk2b/rasip1/ramp2/smad5/cdc42	59
GO:0001525	GO:0001525	angiogenesis	46/577	353/18569	1.52113e-16	1.06783e-13	8.1714e-14	slc2a1a/slc2a1b/cxcr4a/adgrb1a/flt1/hdac9b/pgfb/dll4/pdgfba/efnb2a/igfbp7/nrp1b/hlx1/hspg2/apln/lpar2a/wnk1a/arhgap18/sema3ab/hif1ab/git1/ackr3b/arhgef9b/robo4/kdrl/sdf4/pald1a/pkma/gsk3ba/notch1b/lpar6a/arhgef7b/gata2a/acvrl1/rab11a/mcamb/esama/amotl2a/sox18/gng2/cdh5/kdr/plk2b/rasip1/ramp2/cdc42	46
GO:0007015	GO:0007015	actin filament organization	41/577	330/18569	3.71605e-14	1.9565e-11	1.49718e-11	lcp1/rnd3a/arfip2a/rhoub/rhoj/ppp1r9alb/scinla/rflnb/cfl1l/fscn1a/myo1ca/dbn1/shroom4/myh10/myo6b/rhogb/myo1b/arpc1b/svila/cnn3a/sh3kbp1/cdc42ep5/sptbn1/hip1/arhgef1a/wasf3b/capgb/cttn/tmsb4x/iqgap2/nck1b/rhocb/limk1b/limch1b/arpc5a/tpm3/rhoab/cdc42l/cfl1/tagln2/cdc42	41
GO:0040012	GO:0040012	regulation of locomotion	32/577	267/18569	6.54663e-11	2.75744e-08	2.11008e-08	pdgfbb/sema5ba/sema3ga/kita/pgfb/lef1/dll4/rbpms2b/pdgfba/efnb2a/nrp1b/il6r/anxa5b/llgl2/sema7a/lama4/rbpms2a/s1pr2/sema3ab/robo4/srgap2/cd99/klf6a/plxnb3/mmp14b/amotl2a/tmsb4x/kdr/ptk2bb/gnb1b/smad5/cdc42	32
GO:0040011	GO:0040011	locomotion	39/577	409/18569	5.54632e-10	1.90331e-07	1.45647e-07	cxcr4a/pdgfbb/sema5ba/sema3ga/ccl38.1/lrrc15/kita/pgfb/lef1/dll4/rbpms2b/ccdc141/pdgfba/efnb2a/nrp1b/il6r/anxa5b/llgl2/pik3cg/sema7a/lama4/rbpms2a/s1pr2/sema3ab/ackr3b/robo4/rhogb/srgap2/cd99/klf6a/plxnb3/mmp14b/amotl2a/tmsb4x/kdr/ptk2bb/gnb1b/smad5/cdc42	39
GO:0002040	GO:0002040	sprouting angiogenesis	22/577	144/18569	6.65511e-10	1.90331e-07	1.45647e-07	slc2a1a/slc2a1b/cxcr4a/flt1/pgfb/dll4/efnb2a/igfbp7/nrp1b/hlx1/apln/arhgap18/arhgef9b/kdrl/sdf4/pkma/esama/gng2/cdh5/plk2b/rasip1/cdc42	22
GO:0030334	GO:0030334	regulation of cell migration	28/577	230/18569	7.23004e-10	1.90331e-07	1.45647e-07	pdgfbb/sema5ba/sema3ga/kita/pgfb/lef1/dll4/pdgfba/nrp1b/il6r/llgl2/sema7a/lama4/s1pr2/sema3ab/robo4/srgap2/cd99/klf6a/plxnb3/mmp14b/amotl2a/tmsb4x/kdr/ptk2bb/gnb1b/smad5/cdc42	28
GO:2000145	GO:2000145	regulation of cell motility	29/577	249/18569	1.02422e-09	2.39667e-07	1.83401e-07	pdgfbb/sema5ba/sema3ga/kita/pgfb/lef1/dll4/pdgfba/nrp1b/il6r/anxa5b/llgl2/sema7a/lama4/s1pr2/sema3ab/robo4/srgap2/cd99/klf6a/plxnb3/mmp14b/amotl2a/tmsb4x/kdr/ptk2bb/gnb1b/smad5/cdc42	29
GO:0007219	GO:0007219	Notch signaling pathway	20/577	128/18569	2.66808e-09	5.61897e-07	4.29981e-07	hey1/epas1a/mecom/epas1b/hey2/dll4/tcima/llgl2/notchl/jag2b/hif1ab/llgl1/dlc/itgb1b/tet3/notch1b/adam10a/dtx2/ptbp1a/mfng	20
GO:0001667	GO:0001667	ameboidal-type cell migration	28/577	252/18569	5.75286e-09	1.10141e-06	8.42835e-07	cxcr4a/sema5ba/sema3ga/kita/lef1/tbx2b/dll4/efnb2a/nrp1b/hspg2/apln/sema7a/fscn1a/s1pr2/sema3ab/hif1ab/robo4/itgb1b/klf6a/acvrl1/mmp14b/tns1b/amotl2a/phactr4b/rhoab/smad5/tagln2/cdc42	28
GO:0007264	GO:0007264	small GTPase-mediated signal transduction	31/577	304/18569	6.98819e-09	1.22643e-06	9.38501e-07	spry4/rasgrp3/dock9b/arhgef3/rnd3a/rhoub/rhoj/gdi1/akap13/git1/robo4/rhogb/rgl2/psd2/lpar6a/cdc42se1/cdc42ep5/rasgef1ba/rock2b/ralgapa1/psda/arhgef1a/arhgap31/rhocb/phactr4b/rap1b/akap12b/rhoab/rasip1/cdc42l/cdc42	31
GO:0031032	GO:0031032	actomyosin structure organization	22/577	165/18569	9.06575e-09	1.46865e-06	1.12386e-06	cxcr4a/csrp2/qki2/flncb/mef2d/myh10/myo18ab/cdc42bpaa/myl9a/itgb1b/mef2ca/cnn3a/mef2aa/rock2b/tln1/iqgap2/plecb/limk1b/limch1b/tpm3/rhoab/qkia	22
GO:0008283	GO:0008283	cell population proliferation	37/577	425/18569	1.80493e-08	2.71513e-06	2.0777e-06	hbegfb/tnfrsf9a/igfbp1a/cxcr4a/pdgfbb/hey2/pgfb/lef1/dll4/pdgfba/zic2a/npr3/egfra/llgl2/kitlga/hspg2/cav2/cav1/hbegfa/zic2b/lamb1a/il15/etv5a/cdkn1bb/jund/rhbdf1a/klf6a/tcf7l1b/arhgef7b/ptk2aa/hapln3/amotl2a/btg1/ptk2bb/sh3bp4a/junbb/ptk2ab	37
GO:0050790	GO:0050790	regulation of catalytic activity	40/577	498/18569	4.42445e-08	6.21193e-06	4.75356e-06	kng1/adcyap1b/tbc1d14/cdkn1ca/pdgfbb/si:ch211-288d18.1/spry4/flt1/ccl38.1/rasgrp3/prkag3a/dock9b/kita/agrn/pdgfba/pkig/adap2/igf1ra/egfra/trib1/axin2/si:dkeyp-19e1.3/scarb2a/cav1/pik3r5/agap1/serpinh1a/cdkn1bb/tpd52l1/kdrl/arhgap29a/rgl2/epha2a/dock6/plxnb3/rasgef1ba/trib3/hip1/kdr/rasip1	40
GO:0042692	GO:0042692	muscle cell differentiation	29/577	297/18569	5.59735e-08	7.15463e-06	5.47496e-06	foxf2b/cxcr4a/csrp2/spry4/prdm1a/qki2/lef1/rbpms2b/pdgfba/flncb/mrtfba/myo9ab/rbpms2a/mef2d/myo18ab/dysf/myl9a/itgb1b/mef2ca/apc/mef2cb/mef2aa/mrtfbb/jam2a/tln1/plecb/akap12b/tpm3/qkia	29
GO:0007169	GO:0007169	transmembrane receptor protein tyrosine kinase signaling pathway	30/577	315/18569	5.77535e-08	7.15463e-06	5.47496e-06	angpt2a/hbegfb/igfbp1a/pdgfbb/igfbp3/spry4/flt1/afap1l2/kita/pgfb/dll4/pdgfba/efnb2a/nrp1b/igf1ra/egfra/grb10b/cav2/hbegfa/kdrl/gsk3ba/efnb1/rhbdf1a/epha2a/grb10a/gng2/kdr/efna1b/ptk2bb/efna1a	30
GO:0042127	GO:0042127	regulation of cell population proliferation	29/577	301/18569	7.48913e-08	8.42148e-06	6.44438e-06	hbegfb/tnfrsf9a/igfbp1a/pdgfbb/pgfb/lef1/dll4/pdgfba/zic2a/egfra/llgl2/kitlga/cav2/cav1/hbegfa/lamb1a/il15/etv5a/cdkn1bb/jund/klf6a/tcf7l1b/ptk2aa/hapln3/btg1/ptk2bb/sh3bp4a/junbb/ptk2ab	29
GO:0043549	GO:0043549	regulation of kinase activity	21/577	170/18569	7.59772e-08	8.42148e-06	6.44438e-06	adcyap1b/cdkn1ca/pdgfbb/spry4/flt1/kita/pdgfba/pkig/igf1ra/egfra/trib1/axin2/cav1/pik3r5/cdkn1bb/tpd52l1/kdrl/epha2a/trib3/kdr/rasip1	21
GO:0098609	GO:0098609	cell-cell adhesion	37/577	451/18569	8.39549e-08	8.50651e-06	6.50945e-06	cadm1b/pcdh1g29/ncam3/pcdh19/pvrl2l/igsf5b/mecom/itga4/tmem47/sc:d189/robo3/nectin3b/podxl/dchs1b/pcdh1g3/jag2b/pcdh1b/il15/robo4/dspa/nectin1b/perp/tet3/pkp3b/si:ch211-156j16.1/jupa/cd99/notch1b/esama/jam2a/cdh5/tln1/tjp1a/si:ch73-22o12.1/pcdh12/scarf1/cfl1	37
GO:0042325	GO:0042325	regulation of phosphorylation	27/577	268/18569	8.48227e-08	8.50651e-06	6.50945e-06	adcyap1b/cdkn1ca/pdgfbb/spry4/flt1/kita/pgfb/ppp1r14ba/pdgfba/pkig/il6r/igf1ra/egfra/trib1/axin2/cav1/pik3r5/il15/cdkn1bb/tpd52l1/kdrl/epha2a/btbd10b/trib3/nck1b/kdr/rasip1	27
GO:0048812	GO:0048812	neuron projection morphogenesis	39/577	500/18569	1.41543e-07	1.35496e-05	1.03686e-05	mmp25b/ncam3/sema5ba/sema3ga/lrrc15/myo10l3/agrn/rbpms2b/bsg/efnb2a/nrp1b/robo3/kalrnb/sgk1/sema7a/lamb1b/myo9ab/lama4/dbn1/rbpms2a/sema3ab/hif1ab/lamb1a/appa/kif1b/robo4/nedd4l/ahi1/srgap2/efnb1/fam53b/apc/notch1b/plxnb3/tmem108/pak2a/efna1b/pitpnaa/efna1a	39
GO:0051338	GO:0051338	regulation of transferase activity	21/577	179/18569	1.85101e-07	1.69488e-05	1.29698e-05	adcyap1b/cdkn1ca/pdgfbb/spry4/flt1/kita/pdgfba/pkig/igf1ra/egfra/trib1/axin2/cav1/pik3r5/cdkn1bb/tpd52l1/kdrl/epha2a/trib3/kdr/rasip1	21
GO:0060840	GO:0060840	artery development	10/577	39/18569	2.18978e-07	1.92153e-05	1.47042e-05	hey2/dll4/sox7/dlc/kdrl/notch1b/gata2a/acvrl1/amotl2a/sox18	10
GO:0007409	GO:0007409	axonogenesis	35/577	437/18569	3.3557e-07	2.82684e-05	2.16319e-05	mmp25b/ncam3/sema5ba/sema3ga/lrrc15/myo10l3/agrn/rbpms2b/bsg/efnb2a/nrp1b/robo3/kalrnb/sema7a/lamb1b/myo9ab/lama4/dbn1/rbpms2a/sema3ab/hif1ab/lamb1a/appa/kif1b/robo4/ahi1/efnb1/fam53b/apc/notch1b/plxnb3/pak2a/efna1b/pitpnaa/efna1a	35
GO:0048667	GO:0048667	cell morphogenesis involved in neuron differentiation	37/577	479/18569	3.78488e-07	3.06575e-05	2.34601e-05	mmp25b/ncam3/sema5ba/sema3ga/lrrc15/myo10l3/agrn/rbpms2b/bsg/efnb2a/nrp1b/robo3/kalrnb/llgl2/sema7a/lamb1b/myo9ab/lama4/dbn1/rbpms2a/sema3ab/hif1ab/lamb1a/appa/kif1b/robo4/nedd4l/ahi1/efnb1/fam53b/apc/notch1b/plxnb3/pak2a/efna1b/pitpnaa/efna1a	37
GO:0055001	GO:0055001	muscle cell development	24/577	241/18569	5.47893e-07	4.27357e-05	3.27027e-05	foxf2b/cxcr4a/csrp2/spry4/qki2/lef1/pdgfba/flncb/myo9ab/mef2d/myo18ab/dysf/myl9a/itgb1b/mef2ca/apc/mef2cb/mef2aa/jam2a/tln1/plecb/akap12b/tpm3/qkia	24
GO:0030335	GO:0030335	positive regulation of cell migration	15/577	103/18569	6.64095e-07	4.99494e-05	3.82229e-05	pdgfbb/sema5ba/sema3ga/kita/pgfb/pdgfba/nrp1b/il6r/sema7a/sema3ab/cd99/kdr/ptk2bb/gnb1b/cdc42	15
GO:0007266	GO:0007266	Rho protein signal transduction	15/577	104/18569	7.54144e-07	5.40259e-05	4.13423e-05	arhgef3/rhoub/rhoj/akap13/lpar6a/cdc42se1/cdc42ep5/rock2b/arhgef1a/phactr4b/akap12b/rhoab/rasip1/cdc42l/cdc42	15
GO:0071900	GO:0071900	regulation of protein serine/threonine kinase activity	12/577	66/18569	7.69599e-07	5.40259e-05	4.13423e-05	cdkn1ca/pdgfbb/spry4/kita/pdgfba/pkig/trib1/pik3r5/cdkn1bb/tpd52l1/trib3/rasip1	12
GO:0003158	GO:0003158	endothelium development	12/577	67/18569	9.11364e-07	5.99791e-05	4.5898e-05	slc2a1a/hey2/itga4/egfra/lama4/dlc/tcf7l1b/sh3kbp1/ets1/cdh5/tjp1a/kdr	12
GO:0090132	GO:0090132	epithelium migration	12/577	67/18569	9.11364e-07	5.99791e-05	4.5898e-05	cxcr4a/kita/dll4/efnb2a/nrp1b/hspg2/apln/robo4/klf6a/acvrl1/tagln2/cdc42	12
GO:0019220	GO:0019220	regulation of phosphate metabolic process	27/577	304/18569	1.05791e-06	6.55284e-05	5.01445e-05	adcyap1b/cdkn1ca/pdgfbb/spry4/flt1/kita/pgfb/ppp1r14ba/pdgfba/pkig/il6r/igf1ra/egfra/trib1/axin2/cav1/pik3r5/il15/cdkn1bb/tpd52l1/kdrl/epha2a/btbd10b/trib3/nck1b/kdr/rasip1	27
GO:0051174	GO:0051174	regulation of phosphorus metabolic process	27/577	304/18569	1.05791e-06	6.55284e-05	5.01445e-05	adcyap1b/cdkn1ca/pdgfbb/spry4/flt1/kita/pgfb/ppp1r14ba/pdgfba/pkig/il6r/igf1ra/egfra/trib1/axin2/cav1/pik3r5/il15/cdkn1bb/tpd52l1/kdrl/epha2a/btbd10b/trib3/nck1b/kdr/rasip1	27
GO:0043405	GO:0043405	regulation of MAP kinase activity	8/577	27/18569	1.09051e-06	6.56175e-05	5.02127e-05	pdgfbb/spry4/kita/pdgfba/trib1/pik3r5/tpd52l1/trib3	8
GO:0007411	GO:0007411	axon guidance	25/577	269/18569	1.15944e-06	6.59944e-05	5.0501e-05	mmp25b/ncam3/sema5ba/sema3ga/lrrc15/rbpms2b/bsg/efnb2a/nrp1b/robo3/kalrnb/sema7a/lamb1b/lama4/rbpms2a/sema3ab/hif1ab/lamb1a/kif1b/robo4/ahi1/efnb1/apc/efna1b/efna1a	25
GO:0097485	GO:0097485	neuron projection guidance	25/577	269/18569	1.15944e-06	6.59944e-05	5.0501e-05	mmp25b/ncam3/sema5ba/sema3ga/lrrc15/rbpms2b/bsg/efnb2a/nrp1b/robo3/kalrnb/sema7a/lamb1b/lama4/rbpms2a/sema3ab/hif1ab/lamb1a/kif1b/robo4/ahi1/efnb1/apc/efna1b/efna1a	25
GO:0061061	GO:0061061	muscle structure development	33/577	422/18569	1.24091e-06	6.87728e-05	5.26271e-05	foxf2b/cxcr4a/csrp2/spry4/prdm1a/qki2/lef1/rbpms2b/pdgfba/flncb/hspg2/mrtfba/myo9ab/lama4/rbpms2a/mef2d/lamb1a/myo18ab/dysf/myl9a/itgb1b/mef2ca/apc/mef2cb/mef2aa/mrtfbb/jam2a/tln1/plecb/wwtr1/akap12b/tpm3/qkia	33
GO:2000147	GO:2000147	positive regulation of cell motility	15/577	110/18569	1.56561e-06	8.4543e-05	6.4695e-05	pdgfbb/sema5ba/sema3ga/kita/pgfb/pdgfba/nrp1b/il6r/sema7a/sema3ab/cd99/kdr/ptk2bb/gnb1b/cdc42	15
GO:0061564	GO:0061564	axon development	36/577	488/18569	1.6092e-06	8.47244e-05	6.48339e-05	mmp25b/ncam3/sema5ba/sema3ga/lrrc15/myo10l3/agrn/rbpms2b/bsg/efnb2a/nrp1b/robo3/kalrnb/sema7a/lamb1b/myo9ab/lama4/dbn1/rbpms2a/sema3ab/hif1ab/lamb1a/appa/kif1b/robo4/ahi1/efnb1/fam53b/apc/notch1b/plxnb3/mcamb/pak2a/efna1b/pitpnaa/efna1a	36
GO:0045859	GO:0045859	regulation of protein kinase activity	15/577	111/18569	1.75924e-06	9.03651e-05	6.91503e-05	adcyap1b/cdkn1ca/pdgfbb/spry4/kita/pdgfba/pkig/trib1/axin2/cav1/pik3r5/cdkn1bb/tpd52l1/trib3/rasip1	15
GO:0030855	GO:0030855	epithelial cell differentiation	25/577	276/18569	1.85407e-06	9.29684e-05	7.11424e-05	slc2a1a/myt1b/cxcr4a/mecom/hey2/etv4/tbx2b/prkceb/itga4/myo9ab/lama4/s1pr2/etv5a/dlc/myo6b/gpr156/srgap2/apc/tcf7l1b/ets1/tjp1a/iqgap2/wwtr1/kdr/ptk2ab	25
GO:0051093	GO:0051093	negative regulation of developmental process	19/577	174/18569	2.1153e-06	0.00010015	7.66377e-05	her9/sema5ba/sema3ga/adgrb1a/qki2/dll4/rbpms2b/llgl2/axin2/lpar2a/arhgap18/rflnb/sema7a/rbpms2a/sema3ab/id1/cdh5/foxl2b/qkia	19
GO:0051145	GO:0051145	smooth muscle cell differentiation	6/577	14/18569	2.12933e-06	0.00010015	7.66377e-05	foxf2b/rbpms2b/pdgfba/mrtfba/rbpms2a/mrtfbb	6
GO:0043542	GO:0043542	endothelial cell migration	10/577	49/18569	2.13995e-06	0.00010015	7.66377e-05	cxcr4a/dll4/efnb2a/nrp1b/hspg2/robo4/klf6a/acvrl1/tagln2/cdc42	10
GO:0032970	GO:0032970	regulation of actin filament-based process	20/577	192/18569	2.39912e-06	0.000109838	8.40515e-05	rnd3a/arfip2a/scinla/dbn1/rhogb/svila/cdc42ep5/rock2b/sptbn1/wasf3b/capgb/cttn/tmsb4x/nck1b/rhocb/limk1b/limch1b/abracl/arpc5a/rhoab	20
GO:0090130	GO:0090130	tissue migration	12/577	74/18569	2.73615e-06	0.00012139	9.28919e-05	cxcr4a/kita/dll4/efnb2a/nrp1b/hspg2/apln/robo4/klf6a/acvrl1/tagln2/cdc42	12
GO:0040017	GO:0040017	positive regulation of locomotion	15/577	115/18569	2.76674e-06	0.00012139	9.28919e-05	pdgfbb/sema5ba/sema3ga/kita/pgfb/pdgfba/nrp1b/il6r/sema7a/sema3ab/cd99/kdr/ptk2bb/gnb1b/cdc42	15
GO:0010631	GO:0010631	epithelial cell migration	11/577	63/18569	3.37061e-06	0.000144867	0.000110857	cxcr4a/kita/dll4/efnb2a/nrp1b/hspg2/robo4/klf6a/acvrl1/tagln2/cdc42	11
GO:0035907	GO:0035907	dorsal aorta development	6/577	15/18569	3.45571e-06	0.000145554	0.000111383	hey2/dll4/dlc/notch1b/gata2a/amotl2a	6
GO:0098742	GO:0098742	cell-cell adhesion via plasma-membrane adhesion molecules	20/577	198/18569	3.85612e-06	0.000159235	0.000121852	cadm1b/pcdh1g29/ncam3/pcdh19/pvrl2l/robo3/nectin3b/dchs1b/pcdh1g3/jag2b/pcdh1b/robo4/nectin1b/notch1b/esama/cdh5/si:ch73-22o12.1/pcdh12/scarf1/cfl1	20
GO:0033674	GO:0033674	positive regulation of kinase activity	13/577	92/18569	5.18485e-06	0.000209986	0.000160688	adcyap1b/pdgfbb/flt1/kita/pdgfba/igf1ra/egfra/axin2/pik3r5/tpd52l1/kdrl/epha2a/kdr	13
GO:0010927	GO:0010927	cellular component assembly involved in morphogenesis	15/577	123/18569	6.44162e-06	0.000255963	0.000195871	cxcr4a/csrp2/qki2/flncb/mef2d/myo18ab/myl9a/itgb1b/mef2ca/mef2aa/tln1/plecb/wwtr1/tpm3/qkia	15
GO:0098657	GO:0098657	import into cell	33/577	457/18569	6.88132e-06	0.000268371	0.000205366	ca2/zgc:158423/adgrb1a/kcnj2a/itsn2a/slc7a3a/slc9a6b/cerkl/slc3a2a/sh3gl3a/scarb2a/wnk1a/rhoub/neurl1b/rhoj/fscn1a/myo1ca/lrrc8c/csnk1g1/lrrc8ab/myo6b/dysf/myo1b/ehd1b/slc12a2/rab14/hip1/itsn2b/sh3bp4a/ramp2/cdc42l/ywhaba/cdc42	33
GO:0032956	GO:0032956	regulation of actin cytoskeleton organization	19/577	189/18569	7.18678e-06	0.000275188	0.000210583	rnd3a/arfip2a/scinla/dbn1/rhogb/svila/cdc42ep5/rock2b/sptbn1/wasf3b/capgb/cttn/tmsb4x/nck1b/rhocb/limk1b/limch1b/arpc5a/rhoab	19
GO:0040007	GO:0040007	growth	31/577	418/18569	7.68162e-06	0.000288884	0.000221063	sema5ba/sema3ga/myo10l3/hey2/lef1/pdgfba/igfbp7/robo3/igf1ra/npr3/sema7a/cav1/hbegfa/myo9ab/dbn1/sema3ab/lamb1a/kif1b/fam53b/tubb5/klf6a/notch1b/tmem108/prdx5/cdh5/chd4a/rap1b/vdac3/akap12b/sh3bp4a/junbb	31
GO:0051347	GO:0051347	positive regulation of transferase activity	13/577	96/18569	8.36834e-06	0.000309188	0.000236601	adcyap1b/pdgfbb/flt1/kita/pdgfba/igf1ra/egfra/axin2/pik3r5/tpd52l1/kdrl/epha2a/kdr	13
GO:0009968	GO:0009968	negative regulation of signal transduction	32/577	443/18569	9.41023e-06	0.000341689	0.000261471	igfbp3/spry4/dll4/mapkbp1/rgs3a/cerkl/ldlrad4a/nkd1/bambia/tcima/grb10b/axin2/spred2b/tle3a/tnfaip8l1/skib/dlc/insig1/gsk3ba/jupa/apc/grb10a/sesn1/wwtr1/ptbp1a/nck1b/phactr4b/akap12b/sh3bp4a/sox4a/rasip1/dusp5	32
GO:0007157	GO:0007157	heterophilic cell-cell adhesion via plasma membrane cell adhesion molecules	7/577	26/18569	1.06049e-05	0.000378542	0.000289673	pvrl2l/nectin3b/jag2b/nectin1b/notch1b/si:ch73-22o12.1/scarf1	7
GO:0043085	GO:0043085	positive regulation of catalytic activity	25/577	306/18569	1.14833e-05	0.000403063	0.000308437	adcyap1b/tbc1d14/pdgfbb/si:ch211-288d18.1/flt1/ccl38.1/rasgrp3/dock9b/kita/pdgfba/igf1ra/egfra/axin2/si:dkeyp-19e1.3/pik3r5/agap1/tpd52l1/kdrl/arhgap29a/rgl2/epha2a/dock6/rasgef1ba/hip1/kdr	25
GO:0035904	GO:0035904	aorta development	6/577	18/18569	1.18353e-05	0.000408609	0.00031268	hey2/dll4/dlc/notch1b/gata2a/amotl2a	6
GO:0046031	GO:0046031	ADP metabolic process	9/577	47/18569	1.20433e-05	0.000409083	0.000313043	hkdc1/aldocb/eno1a/pfkpa/pkma/gpia/gapdhs/ak1/tpi1b	9
GO:0048863	GO:0048863	stem cell differentiation	23/577	269/18569	1.23268e-05	0.000412067	0.000315327	cxcr4a/sema5ba/epas1a/sema3ga/prdm1a/epas1b/kita/lef1/nrp1b/zic2a/hspg2/sema7a/jag2b/fscn1a/zic2b/sema3ab/hif1ab/dlc/notch1b/tln1/phactr4b/efna1b/rap1b	23
GO:0030239	GO:0030239	myofibril assembly	14/577	115/18569	1.33028e-05	0.000437745	0.000334976	cxcr4a/csrp2/qki2/flncb/mef2d/myo18ab/myl9a/itgb1b/mef2ca/mef2aa/tln1/plecb/tpm3/qkia	14
GO:0009135	GO:0009135	purine nucleoside diphosphate metabolic process	9/577	48/18569	1.44183e-05	0.000460075	0.000352064	hkdc1/aldocb/eno1a/pfkpa/pkma/gpia/gapdhs/ak1/tpi1b	9
GO:0009179	GO:0009179	purine ribonucleoside diphosphate metabolic process	9/577	48/18569	1.44183e-05	0.000460075	0.000352064	hkdc1/aldocb/eno1a/pfkpa/pkma/gpia/gapdhs/ak1/tpi1b	9
GO:0042327	GO:0042327	positive regulation of phosphorylation	17/577	165/18569	1.56558e-05	0.000488335	0.00037369	adcyap1b/pdgfbb/flt1/kita/pgfb/pdgfba/il6r/igf1ra/egfra/axin2/pik3r5/il15/tpd52l1/kdrl/epha2a/btbd10b/kdr	17
GO:0048589	GO:0048589	developmental growth	29/577	392/18569	1.57677e-05	0.000488335	0.00037369	sema5ba/sema3ga/myo10l3/hey2/lef1/pdgfba/robo3/igf1ra/npr3/sema7a/cav1/hbegfa/myo9ab/dbn1/sema3ab/lamb1a/kif1b/fam53b/tubb5/klf6a/notch1b/tmem108/prdx5/cdh5/chd4a/rap1b/vdac3/akap12b/junbb	29
GO:0042060	GO:0042060	wound healing	13/577	102/18569	1.6361e-05	0.000492704	0.000377033	kng1/f2rl2/bambia/il6r/dspa/dysf/si:ch211-156j16.1/eppk1/esama/macf1a/plecb/rhocb/rhoab	13
GO:0010648	GO:0010648	negative regulation of cell communication	32/577	456/18569	1.68303e-05	0.000492704	0.000377033	igfbp3/spry4/dll4/mapkbp1/rgs3a/cerkl/ldlrad4a/nkd1/bambia/tcima/grb10b/axin2/spred2b/tle3a/tnfaip8l1/skib/dlc/insig1/gsk3ba/jupa/apc/grb10a/sesn1/wwtr1/ptbp1a/nck1b/phactr4b/akap12b/sh3bp4a/sox4a/rasip1/dusp5	32
GO:0023057	GO:0023057	negative regulation of signaling	32/577	456/18569	1.68303e-05	0.000492704	0.000377033	igfbp3/spry4/dll4/mapkbp1/rgs3a/cerkl/ldlrad4a/nkd1/bambia/tcima/grb10b/axin2/spred2b/tle3a/tnfaip8l1/skib/dlc/insig1/gsk3ba/jupa/apc/grb10a/sesn1/wwtr1/ptbp1a/nck1b/phactr4b/akap12b/sh3bp4a/sox4a/rasip1/dusp5	32
GO:0051014	GO:0051014	actin filament severing	6/577	19/18569	1.68446e-05	0.000492704	0.000377033	scinla/cfl1l/srgap2/svila/capgb/cfl1	6
GO:0001932	GO:0001932	regulation of protein phosphorylation	19/577	201/18569	1.7364e-05	0.00050094	0.000383335	adcyap1b/cdkn1ca/pdgfbb/spry4/kita/pgfb/pdgfba/pkig/il6r/trib1/axin2/cav1/pik3r5/il15/cdkn1bb/tpd52l1/trib3/nck1b/rasip1	19
GO:0007163	GO:0007163	establishment or maintenance of cell polarity	14/577	120/18569	2.1704e-05	0.000611202	0.000467711	llgl2/rhoub/rhoj/jag2b/fscn1a/myo9ab/llgl1/rhogb/notch1b/mmp14b/amotl2a/cdh5/cdc42l/cdc42	14
GO:0040013	GO:0040013	negative regulation of locomotion	11/577	76/18569	2.17664e-05	0.000611202	0.000467711	sema5ba/sema3ga/lef1/dll4/llgl2/sema7a/s1pr2/sema3ab/srgap2/plxnb3/smad5	11
GO:0045596	GO:0045596	negative regulation of cell differentiation	14/577	121/18569	2.38566e-05	0.000658453	0.00050387	her9/sema5ba/sema3ga/qki2/rbpms2b/llgl2/lpar2a/rflnb/sema7a/rbpms2a/sema3ab/id1/foxl2b/qkia	14
GO:0045446	GO:0045446	endothelial cell differentiation	9/577	51/18569	2.40745e-05	0.000658453	0.00050387	slc2a1a/hey2/itga4/lama4/dlc/tcf7l1b/ets1/tjp1a/kdr	9
GO:0009185	GO:0009185	ribonucleoside diphosphate metabolic process	9/577	52/18569	2.83204e-05	0.000764651	0.000585136	hkdc1/aldocb/eno1a/pfkpa/pkma/gpia/gapdhs/ak1/tpi1b	9
GO:0048562	GO:0048562	embryonic organ morphogenesis	32/577	470/18569	3.05138e-05	0.000813444	0.000622474	cxcr4a/igfbp3/prdm1a/mecom/afap1l2/tbx2b/efnb2a/nkd1/adap2/sema6a/zic2a/igf1ra/hspg2/fscn1a/s1pr2/zic2b/lamb1a/llgl1/skib/myo6b/gsk3ba/efnb1/apc/slc12a2/mef2cb/trib3/tmsb4x/tln1/phactr4b/rap1b/sox4a/smad5	32
GO:0055002	GO:0055002	striated muscle cell development	14/577	124/18569	3.14822e-05	0.000828769	0.0006342	cxcr4a/csrp2/qki2/flncb/mef2d/myo18ab/myl9a/itgb1b/mef2ca/mef2aa/tln1/plecb/tpm3/qkia	14
GO:0044087	GO:0044087	regulation of cellular component biogenesis	23/577	286/18569	3.27593e-05	0.000851741	0.00065178	tbc1d14/abcc4/nrp1b/podxl/scinla/dbn1/lamb1a/arhgef9b/appa/svila/cdc42ep5/rock2b/mmp14b/sptbn1/capgb/cttn/macf1a/tmsb4x/nck1b/limk1b/limch1b/arpc5a/cdc42	23
GO:0051056	GO:0051056	regulation of small GTPase mediated signal transduction	14/577	125/18569	3.44609e-05	0.000885056	0.000677273	spry4/arhgef3/akap13/git1/robo4/psd2/lpar6a/cdc42se1/ralgapa1/psda/arhgef1a/akap12b/rhoab/rasip1	14
GO:0060562	GO:0060562	epithelial tube morphogenesis	22/577	268/18569	3.54564e-05	0.000896691	0.000686177	pcdh19/igfbp3/tbx2b/dll4/igfbp7/nkd1/adap2/zic2a/egfra/s1pr2/sema3ab/llgl1/skib/gsk3ba/apc/mef2cb/sh3kbp1/trib3/tmsb4x/cdh5/phactr4b/smad5	22
GO:0060485	GO:0060485	mesenchyme development	21/577	249/18569	3.57655e-05	0.000896691	0.000686177	cxcr4a/sema5ba/sema3ga/prdm1a/lef1/nrp1b/zic2a/llgl2/hspg2/sema7a/fscn1a/zic2b/tle3a/sema3ab/hif1ab/lamb1a/dlc/apc/tln1/phactr4b/prkd2	21
GO:0051493	GO:0051493	regulation of cytoskeleton organization	22/577	269/18569	3.75165e-05	0.000929527	0.000711304	rnd3a/arfip2a/scinla/dbn1/rhogb/gsk3ba/apc/svila/cdc42ep5/rock2b/sptbn1/wasf3b/capgb/cttn/tmsb4x/nck1b/rhocb/limk1b/limch1b/arpc5a/rhoab/mapre1b	22
GO:0043408	GO:0043408	regulation of MAPK cascade	19/577	213/18569	3.89519e-05	0.000953868	0.000729931	adcyap1b/pdgfbb/spry4/tirap/ccl38.1/kita/mapkbp1/pdgfba/igf1ra/grapa/cav2/sema7a/spred2b/pik3r5/tpd52l1/grb2a/pak2a/kdr/dusp5	19
GO:0022603	GO:0022603	regulation of anatomical structure morphogenesis	25/577	330/18569	4.08211e-05	0.000988152	0.000756166	sema5ba/sema3ga/adgrb1a/pgfb/dll4/palm1b/arhgap18/sema7a/dbn1/sema3ab/hif1ab/palm2akap2/myh10/nedd4l/rhogb/palm1a/gata2a/cdc42se1/cdc42ep5/plxnb3/amotl2a/cdh5/pak2a/kdr/ptk2ab	25
GO:0010562	GO:0010562	positive regulation of phosphorus metabolic process	17/577	178/18569	4.17758e-05	0.000988537	0.00075646	adcyap1b/pdgfbb/flt1/kita/pgfb/pdgfba/il6r/igf1ra/egfra/axin2/pik3r5/il15/tpd52l1/kdrl/epha2a/btbd10b/kdr	17
GO:0045937	GO:0045937	positive regulation of phosphate metabolic process	17/577	178/18569	4.17758e-05	0.000988537	0.00075646	adcyap1b/pdgfbb/flt1/kita/pgfb/pdgfba/il6r/igf1ra/egfra/axin2/pik3r5/il15/tpd52l1/kdrl/epha2a/btbd10b/kdr	17
GO:0014866	GO:0014866	skeletal myofibril assembly	6/577	22/18569	4.27805e-05	0.00100106	0.000766046	qki2/mef2d/myo18ab/mef2ca/tpm3/qkia	6
GO:0043406	GO:0043406	positive regulation of MAP kinase activity	5/577	14/18569	4.51555e-05	0.00103113	0.000789052	pdgfbb/kita/pdgfba/pik3r5/tpd52l1	5
GO:0006096	GO:0006096	glycolytic process	8/577	43/18569	4.59571e-05	0.00103113	0.000789052	hkdc1/aldocb/eno1a/pfkpa/pkma/gpia/gapdhs/tpi1b	8
GO:0046032	GO:0046032	ADP catabolic process	8/577	43/18569	4.59571e-05	0.00103113	0.000789052	hkdc1/aldocb/eno1a/pfkpa/pkma/gpia/gapdhs/tpi1b	8
GO:0007156	GO:0007156	homophilic cell adhesion via plasma membrane adhesion molecules	16/577	162/18569	4.65133e-05	0.00103113	0.000789052	cadm1b/pcdh1g29/ncam3/pcdh19/pvrl2l/robo3/nectin3b/dchs1b/pcdh1g3/pcdh1b/robo4/nectin1b/esama/cdh5/si:ch73-22o12.1/pcdh12	16
GO:0009611	GO:0009611	response to wounding	16/577	162/18569	4.65133e-05	0.00103113	0.000789052	kng1/f2rl2/nrp1b/bambia/il6r/hbegfa/dspa/dysf/si:ch211-156j16.1/eppk1/mcamb/esama/macf1a/plecb/rhocb/rhoab	16
GO:0009137	GO:0009137	purine nucleoside diphosphate catabolic process	8/577	44/18569	5.46569e-05	0.00118667	0.000908082	hkdc1/aldocb/eno1a/pfkpa/pkma/gpia/gapdhs/tpi1b	8
GO:0009181	GO:0009181	purine ribonucleoside diphosphate catabolic process	8/577	44/18569	5.46569e-05	0.00118667	0.000908082	hkdc1/aldocb/eno1a/pfkpa/pkma/gpia/gapdhs/tpi1b	8
GO:0048915	GO:0048915	posterior lateral line system development	11/577	84/18569	5.64265e-05	0.00121259	0.000927917	lef1/llgl2/esr1/s1pr2/llgl1/ackr3b/kif1b/gpr156/apc/gnb1b/smad5	11
GO:0045860	GO:0045860	positive regulation of protein kinase activity	7/577	33/18569	5.70182e-05	0.00121293	0.000928175	adcyap1b/pdgfbb/kita/pdgfba/axin2/pik3r5/tpd52l1	7
GO:0110053	GO:0110053	regulation of actin filament organization	14/577	132/18569	6.31589e-05	0.00133013	0.00101786	arfip2a/scinla/dbn1/svila/cdc42ep5/sptbn1/wasf3b/capgb/cttn/tmsb4x/nck1b/limk1b/limch1b/arpc5a	14
GO:0009191	GO:0009191	ribonucleoside diphosphate catabolic process	8/577	45/18569	6.46849e-05	0.00134491	0.00102917	hkdc1/aldocb/eno1a/pfkpa/pkma/gpia/gapdhs/tpi1b	8
GO:0048916	GO:0048916	posterior lateral line development	10/577	71/18569	6.51381e-05	0.00134491	0.00102917	lef1/llgl2/esr1/s1pr2/llgl1/ackr3b/gpr156/apc/gnb1b/smad5	10
GO:0051241	GO:0051241	negative regulation of multicellular organismal process	18/577	204/18569	7.12348e-05	0.00145651	0.00111457	kng1/her9/sema5ba/sema3ga/adgrb1a/qki2/dll4/sc:d189/anxa5b/llgl2/axin2/arhgap18/rflnb/sema7a/sema3ab/id1/cdh5/qkia	18
GO:0019364	GO:0019364	pyridine nucleotide catabolic process	8/577	46/18569	7.61954e-05	0.00152826	0.00116947	hkdc1/aldocb/eno1a/pfkpa/pkma/gpia/gapdhs/tpi1b	8
GO:0072526	GO:0072526	pyridine-containing compound catabolic process	8/577	46/18569	7.61954e-05	0.00152826	0.00116947	hkdc1/aldocb/eno1a/pfkpa/pkma/gpia/gapdhs/tpi1b	8
GO:0048881	GO:0048881	mechanosensory lateral line system development	11/577	87/18569	7.82313e-05	0.00155429	0.0011894	lef1/llgl2/esr1/s1pr2/llgl1/ackr3b/kif1b/gpr156/apc/gnb1b/smad5	11
GO:0043534	GO:0043534	blood vessel endothelial cell migration	7/577	35/18569	8.50448e-05	0.00167387	0.0012809	cxcr4a/dll4/efnb2a/nrp1b/hspg2/acvrl1/cdc42	7
GO:0032868	GO:0032868	response to insulin	8/577	47/18569	8.93548e-05	0.00174242	0.00133335	slc2a1a/slc2a1b/grb10b/cav2/lpin2/insig1/gsk3ba/grb10a	8
GO:0006090	GO:0006090	pyruvate metabolic process	9/577	60/18569	9.12681e-05	0.0017634	0.00134941	hkdc1/aldocb/eno1a/ldha/pfkpa/pkma/gpia/gapdhs/tpi1b	9
GO:0120035	GO:0120035	regulation of plasma membrane bounded cell projection organization	19/577	228/18569	9.75892e-05	0.00186839	0.00142975	sema5ba/abcc4/sema3ga/rbpms2b/nrp1b/podxl/sema7a/dbn1/rbpms2a/sema3ab/lamb1a/appa/nedd4l/gsk3ba/cdc42ep5/plxnb3/pak2a/tfg/cdc42	19
GO:0031344	GO:0031344	regulation of cell projection organization	19/577	230/18569	0.000109534	0.00207819	0.0015903	sema5ba/abcc4/sema3ga/rbpms2b/nrp1b/podxl/sema7a/dbn1/rbpms2a/sema3ab/lamb1a/appa/nedd4l/gsk3ba/cdc42ep5/plxnb3/pak2a/tfg/cdc42	19
GO:0001666	GO:0001666	response to hypoxia	10/577	76/18569	0.000117202	0.00218432	0.00167151	igfbp1a/epas1a/epas1b/pgfb/plekhn1/ldha/nrp1b/apln/hif1ab/egln2	10
GO:0001945	GO:0001945	lymph vessel development	10/577	76/18569	0.000117202	0.00218432	0.00167151	cxcr4a/hdac9b/dll4/apln/kdrl/notch1b/mcamb/sox18/junbb/smad5	10
GO:0048010	GO:0048010	vascular endothelial growth factor receptor signaling pathway	6/577	26/18569	0.000118747	0.0021937	0.00167869	flt1/pgfb/dll4/nrp1b/gng2/kdr	6
GO:0071902	GO:0071902	positive regulation of protein serine/threonine kinase activity	5/577	17/18569	0.000129168	0.00235818	0.00180455	pdgfbb/kita/pdgfba/pik3r5/tpd52l1	5
GO:0033043	GO:0033043	regulation of organelle organization	29/577	441/18569	0.000130764	0.00235818	0.00180455	sycp1/tbc1d14/abcc4/rnd3a/arfip2a/axin2/scinla/dbn1/lamb1a/arhgef9b/appa/rhogb/gsk3ba/apc/svila/cdc42ep5/rock2b/sptbn1/wasf3b/capgb/cttn/tmsb4x/nck1b/rhocb/limk1b/limch1b/arpc5a/rhoab/mapre1b	29
GO:0036293	GO:0036293	response to decreased oxygen levels	10/577	77/18569	0.00013101	0.00235818	0.00180455	igfbp1a/epas1a/epas1b/pgfb/plekhn1/ldha/nrp1b/apln/hif1ab/egln2	10
GO:0009132	GO:0009132	nucleoside diphosphate metabolic process	9/577	63/18569	0.000134537	0.00240114	0.00183743	hkdc1/aldocb/eno1a/pfkpa/pkma/gpia/gapdhs/ak1/tpi1b	9
GO:0043087	GO:0043087	regulation of GTPase activity	15/577	160/18569	0.000143542	0.00251997	0.00192836	adcyap1b/tbc1d14/si:ch211-288d18.1/ccl38.1/rasgrp3/dock9b/adap2/si:dkeyp-19e1.3/agap1/arhgap29a/rgl2/dock6/plxnb3/rasgef1ba/rasip1	15
GO:0044093	GO:0044093	positive regulation of molecular function	25/577	357/18569	0.000143588	0.00251997	0.00192836	adcyap1b/tbc1d14/pdgfbb/si:ch211-288d18.1/flt1/ccl38.1/rasgrp3/dock9b/kita/pdgfba/igf1ra/egfra/axin2/si:dkeyp-19e1.3/pik3r5/agap1/tpd52l1/kdrl/arhgap29a/rgl2/epha2a/dock6/rasgef1ba/hip1/kdr	25
GO:0150105	GO:0150105	protein localization to cell-cell junction	4/577	10/18569	0.00016688	0.00290453	0.00222264	mpp7a/arhgef7b/cgnl1/tjp1a	4
GO:0006897	GO:0006897	endocytosis	23/577	320/18569	0.000179596	0.00304847	0.00233279	adgrb1a/itsn2a/cerkl/sh3gl3a/scarb2a/rhoub/neurl1b/rhoj/fscn1a/myo1ca/csnk1g1/myo6b/dysf/myo1b/ehd1b/rab14/hip1/itsn2b/sh3bp4a/ramp2/cdc42l/ywhaba/cdc42	23
GO:0051146	GO:0051146	striated muscle cell differentiation	19/577	239/18569	0.000180746	0.00304847	0.00233279	cxcr4a/csrp2/spry4/prdm1a/qki2/flncb/myo9ab/mef2d/myo18ab/myl9a/itgb1b/mef2ca/mef2cb/mef2aa/jam2a/tln1/plecb/tpm3/qkia	19
GO:0022604	GO:0022604	regulation of cell morphogenesis	10/577	80/18569	0.00018094	0.00304847	0.00233279	palm1b/dbn1/palm2akap2/myh10/rhogb/palm1a/cdc42se1/cdc42ep5/plxnb3/amotl2a	10
GO:0070482	GO:0070482	response to oxygen levels	10/577	80/18569	0.00018094	0.00304847	0.00233279	igfbp1a/epas1a/epas1b/pgfb/plekhn1/ldha/nrp1b/apln/hif1ab/egln2	10
GO:0003007	GO:0003007	heart morphogenesis	20/577	260/18569	0.000191935	0.00320805	0.0024549	tbx2b/nkd1/adap2/igf1ra/s1pr2/mef2d/lamb1a/llgl1/skib/gsk3ba/mef2ca/apc/mef2cb/rock2b/trib3/ccm2l/tmsb4x/wwtr1/prkd2/smad5	20
GO:0008360	GO:0008360	regulation of cell shape	9/577	66/18569	0.000193741	0.00321275	0.0024585	palm1b/palm2akap2/myh10/rhogb/palm1a/cdc42se1/cdc42ep5/plxnb3/amotl2a	9
GO:0014033	GO:0014033	neural crest cell differentiation	15/577	165/18569	0.000201829	0.00332072	0.00254112	cxcr4a/sema5ba/sema3ga/prdm1a/lef1/nrp1b/zic2a/hspg2/sema7a/fscn1a/zic2b/sema3ab/hif1ab/tln1/phactr4b	15
GO:0000165	GO:0000165	MAPK cascade	19/577	243/18569	0.000223691	0.00365189	0.00279454	adcyap1b/pdgfbb/spry4/tirap/ccl38.1/kita/mapkbp1/pdgfba/igf1ra/grapa/cav2/sema7a/spred2b/pik3r5/tpd52l1/grb2a/pak2a/kdr/dusp5	19
GO:0046847	GO:0046847	filopodium assembly	6/577	29/18569	0.000226342	0.00366675	0.00280591	nrp1b/arhgef9b/robo4/srgap2/amotl2a/cdc42	6
GO:0045732	GO:0045732	positive regulation of protein catabolic process	7/577	41/18569	0.000241979	0.00386363	0.00295657	oaz2b/oaz2a/trib1/axin2/gsk3ba/apc/trib3	7
GO:0030031	GO:0030031	cell projection assembly	27/577	413/18569	0.000242785	0.00386363	0.00295657	cxcr4a/abcc4/nrp1b/flncb/podxl/llgl2/ablim1a/ift52/scinla/lamb1a/llgl1/arhgef9b/appa/robo4/ahi1/mtss1la/srgap2/ehd1b/arhgef7b/cdc42ep5/mcamb/capgb/amotl2a/wwtr1/akap12b/cfl1/cdc42	27
GO:0009134	GO:0009134	nucleoside diphosphate catabolic process	8/577	54/18569	0.000244345	0.00386363	0.00295657	hkdc1/aldocb/eno1a/pfkpa/pkma/gpia/gapdhs/tpi1b	8
GO:1902903	GO:1902903	regulation of supramolecular fiber organization	15/577	168/18569	0.000245834	0.00386363	0.00295657	arfip2a/scinla/dbn1/apc/svila/cdc42ep5/sptbn1/wasf3b/capgb/cttn/tmsb4x/nck1b/limk1b/limch1b/arpc5a	15
GO:0032488	GO:0032488	Cdc42 protein signal transduction	4/577	11/18569	0.000255804	0.00399054	0.00305369	rhoub/rhoj/cdc42l/cdc42	4
GO:0048844	GO:0048844	artery morphogenesis	5/577	20/18569	0.00029956	0.00463877	0.00354974	hey2/kdrl/gata2a/acvrl1/amotl2a	5
GO:0050673	GO:0050673	epithelial cell proliferation	9/577	70/18569	0.00030498	0.00465427	0.00356159	pgfb/dll4/egfra/llgl2/hspg2/cav2/cav1/arhgef7b/amotl2a	9
GO:0050920	GO:0050920	regulation of chemotaxis	9/577	70/18569	0.00030498	0.00465427	0.00356159	sema5ba/sema3ga/pgfb/rbpms2b/efnb2a/il6r/sema7a/rbpms2a/sema3ab	9
GO:0048762	GO:0048762	mesenchymal cell differentiation	16/577	191/18569	0.000319934	0.00484734	0.00370934	cxcr4a/sema5ba/sema3ga/prdm1a/lef1/nrp1b/zic2a/llgl2/hspg2/sema7a/fscn1a/zic2b/sema3ab/hif1ab/tln1/phactr4b	16
GO:0031076	GO:0031076	embryonic camera-type eye development	8/577	57/18569	0.000357672	0.00538041	0.00411726	afap1l2/efnb2a/sema6a/igf1ra/efnb1/tln1/phactr4b/sox4a	8
GO:0010721	GO:0010721	negative regulation of cell development	9/577	72/18569	0.000377828	0.00564331	0.00431844	her9/sema5ba/sema3ga/qki2/rflnb/sema7a/sema3ab/id1/qkia	9
GO:0031101	GO:0031101	fin regeneration	10/577	88/18569	0.000397482	0.00589505	0.00451108	lef1/igf1ra/lamb1a/fam53b/tubb5/notch1b/prdx5/chd4a/vdac3/junbb	10
GO:0009952	GO:0009952	anterior/posterior pattern specification	19/577	255/18569	0.00041052	0.00604583	0.00462647	hey1/her9/hey2/lef1/agrn/efnb2a/igf1ra/cav1/dlc/myh10/apc/mef2aa/tcf7l1b/cdc42se1/mmp14b/ccm2l/wwtr1/rap1b/ptk2ab	19
GO:0030336	GO:0030336	negative regulation of cell migration	7/577	45/18569	0.000438755	0.00641679	0.00491034	lef1/dll4/llgl2/s1pr2/srgap2/plxnb3/smad5	7
GO:0016049	GO:0016049	cell growth	14/577	160/18569	0.000480854	0.006984	0.00534438	sema5ba/sema3ga/myo10l3/igfbp7/robo3/sema7a/myo9ab/dbn1/sema3ab/kif1b/fam53b/tmem108/cdh5/sh3bp4a	14
GO:0001935	GO:0001935	endothelial cell proliferation	7/577	46/18569	0.00050383	0.00721813	0.00552355	pgfb/dll4/hspg2/cav2/cav1/arhgef7b/amotl2a	7
GO:2000146	GO:2000146	negative regulation of cell motility	7/577	46/18569	0.00050383	0.00721813	0.00552355	lef1/dll4/llgl2/s1pr2/srgap2/plxnb3/smad5	7
GO:0035023	GO:0035023	regulation of Rho protein signal transduction	8/577	60/18569	0.000510514	0.00726448	0.00555901	arhgef3/akap13/lpar6a/cdc42se1/arhgef1a/akap12b/rhoab/rasip1	8
GO:0031399	GO:0031399	regulation of protein modification process	19/577	260/18569	0.000521599	0.0073724	0.00564159	adcyap1b/cdkn1ca/pdgfbb/spry4/kita/pgfb/pdgfba/pkig/il6r/trib1/axin2/cav1/pik3r5/il15/cdkn1bb/tpd52l1/trib3/nck1b/rasip1	19
GO:0042246	GO:0042246	tissue regeneration	13/577	144/18569	0.000562953	0.00790386	0.00604829	lef1/pdgfba/igf1ra/cav1/hbegfa/lamb1a/fam53b/tubb5/notch1b/prdx5/chd4a/vdac3/junbb	13
GO:0001570	GO:0001570	vasculogenesis	8/577	61/18569	0.000571851	0.00792315	0.00606305	cxcr4a/flt1/hey2/nrp1b/sox7/ackr3b/sox18/wwtr1	8
GO:0008593	GO:0008593	regulation of Notch signaling pathway	8/577	61/18569	0.000571851	0.00792315	0.00606305	mecom/dll4/tcima/llgl2/llgl1/dlc/ptbp1a/mfng	8
GO:0008154	GO:0008154	actin polymerization or depolymerization	12/577	127/18569	0.000604316	0.00831823	0.00636537	scinla/cfl1l/dbn1/svila/cdc42ep5/sptbn1/capgb/cttn/tmsb4x/nck1b/arpc5a/cfl1	12
GO:0048596	GO:0048596	embryonic camera-type eye morphogenesis	7/577	48/18569	0.000656952	0.00885824	0.00677861	afap1l2/efnb2a/sema6a/efnb1/tln1/phactr4b/sox4a	7
GO:0051336	GO:0051336	regulation of hydrolase activity	20/577	286/18569	0.000657046	0.00885824	0.00677861	kng1/adcyap1b/tbc1d14/si:ch211-288d18.1/ccl38.1/rasgrp3/dock9b/agrn/adap2/si:dkeyp-19e1.3/scarb2a/agap1/serpinh1a/arhgap29a/rgl2/dock6/plxnb3/rasgef1ba/hip1/rasip1	20
GO:0050678	GO:0050678	regulation of epithelial cell proliferation	6/577	35/18569	0.000660372	0.00885824	0.00677861	pgfb/dll4/egfra/llgl2/cav2/cav1	6
GO:1902414	GO:1902414	protein localization to cell junction	6/577	35/18569	0.000660372	0.00885824	0.00677861	mpp7a/nectin1b/arhgef7b/rab11a/cgnl1/tjp1a	6
GO:0014032	GO:0014032	neural crest cell development	13/577	147/18569	0.000684522	0.00906669	0.00693812	cxcr4a/sema5ba/sema3ga/prdm1a/lef1/nrp1b/zic2a/sema7a/fscn1a/zic2b/sema3ab/hif1ab/phactr4b	13
GO:0048864	GO:0048864	stem cell development	13/577	147/18569	0.000684522	0.00906669	0.00693812	cxcr4a/sema5ba/sema3ga/prdm1a/lef1/nrp1b/zic2a/sema7a/fscn1a/zic2b/sema3ab/hif1ab/phactr4b	13
GO:0009154	GO:0009154	purine ribonucleotide catabolic process	8/577	63/18569	0.000712387	0.00937679	0.00717542	hkdc1/aldocb/eno1a/pfkpa/pkma/gpia/gapdhs/tpi1b	8
GO:1902533	GO:1902533	positive regulation of intracellular signal transduction	18/577	247/18569	0.00074818	0.00978675	0.00748914	adcyap1b/pdgfbb/tirap/ccl38.1/kita/mapkbp1/pdgfba/arhgef3/igf1ra/cav2/sema7a/pik3r5/akap13/robo4/tpd52l1/lpar6a/nck1b/akap12b	18
GO:0018193	GO:0018193	peptidyl-amino acid modification	23/577	355/18569	0.000774349	0.0100665	0.00770324	p4ha1b/fkbp1ab/prkceb/eogt/il6r/sgk1/zdhhc20a/cav1/hipk3b/csnk1g1/il15/egln2/aatka/gsk3ba/cdc42bpaa/prkcea/rps6ka3a/rock2b/mknk2a/crtap/tpst1/plod1a/fkbp1aa	23
GO:0009261	GO:0009261	ribonucleotide catabolic process	8/577	64/18569	0.000792399	0.010238	0.00783444	hkdc1/aldocb/eno1a/pfkpa/pkma/gpia/gapdhs/tpi1b	8
GO:0009799	GO:0009799	specification of symmetry	22/577	335/18569	0.000837355	0.0106233	0.00812929	flt1/tbx2b/nkd1/adap2/robo3/apln/lamb1a/llgl1/skib/ahi1/gsk3ba/itgb1b/apc/acvrl1/rock2b/trib3/mcamb/sesn1/tmsb4x/wwtr1/smad5/cfl1	22
GO:0009855	GO:0009855	determination of bilateral symmetry	22/577	335/18569	0.000837355	0.0106233	0.00812929	flt1/tbx2b/nkd1/adap2/robo3/apln/lamb1a/llgl1/skib/ahi1/gsk3ba/itgb1b/apc/acvrl1/rock2b/trib3/mcamb/sesn1/tmsb4x/wwtr1/smad5/cfl1	22
GO:0090596	GO:0090596	sensory organ morphogenesis	22/577	335/18569	0.000837355	0.0106233	0.00812929	her9/igfbp3/afap1l2/tbx2b/agrn/efnb2a/cerkl/sema6a/zic2a/igf1ra/lamb1a/myo6b/efnb1/apc/slc12a2/cdipt/tln1/phactr4b/sox4a/smad5/ptk2ab/cdc42	22
GO:0043547	GO:0043547	positive regulation of GTPase activity	12/577	132/18569	0.000852956	0.0107564	0.00823118	adcyap1b/tbc1d14/si:ch211-288d18.1/ccl38.1/rasgrp3/dock9b/si:dkeyp-19e1.3/agap1/arhgap29a/rgl2/dock6/rasgef1ba	12
GO:0008284	GO:0008284	positive regulation of cell population proliferation	13/577	151/18569	0.000880391	0.0110181	0.00843137	hbegfb/pdgfbb/pgfb/pdgfba/egfra/kitlga/hbegfa/il15/tcf7l1b/ptk2aa/hapln3/ptk2bb/ptk2ab	13
GO:0003170	GO:0003170	heart valve development	6/577	37/18569	0.00089741	0.0110181	0.00843137	adap2/llgl1/jupa/apc/gata2a/tmsb4x	6
GO:0048919	GO:0048919	posterior lateral line neuromast development	6/577	37/18569	0.00089741	0.0110181	0.00843137	lef1/llgl2/s1pr2/llgl1/gpr156/smad5	6
GO:0021514	GO:0021514	ventral spinal cord interneuron differentiation	5/577	25/18569	0.00090285	0.0110181	0.00843137	dll4/jag2b/dlc/notch1b/gata2a	5
GO:0071901	GO:0071901	negative regulation of protein serine/threonine kinase activity	5/577	25/18569	0.00090285	0.0110181	0.00843137	cdkn1ca/spry4/pkig/cdkn1bb/rasip1	5
GO:0046034	GO:0046034	ATP metabolic process	9/577	81/18569	0.000905092	0.0110181	0.00843137	hkdc1/aldocb/eno1a/pfkpa/pkma/gpia/gapdhs/ak1/tpi1b	9
GO:0031099	GO:0031099	regeneration	16/577	211/18569	0.000950006	0.0114983	0.0087989	igfbp1a/lef1/pdgfba/igf1ra/cav1/hbegfa/lamb1a/fam53b/tubb5/notch1b/mcamb/prdx5/chd4a/vdac3/junbb/smad5	16
GO:0042074	GO:0042074	cell migration involved in gastrulation	9/577	82/18569	0.000989257	0.011905	0.00911009	cxcr4a/tbx2b/apln/s1pr2/itgb1b/mmp14b/rhoab/smad5/cdc42	9
GO:1990138	GO:1990138	neuron projection extension	11/577	118/18569	0.00112732	0.0134894	0.0103225	sema5ba/sema3ga/myo10l3/robo3/sema7a/myo9ab/dbn1/sema3ab/kif1b/fam53b/tmem108	11
GO:0007044	GO:0007044	cell-substrate junction assembly	4/577	16/18569	0.00124648	0.0147477	0.0112854	llgl2/macf1a/plecb/limch1b	4
GO:0150115	GO:0150115	cell-substrate junction organization	4/577	16/18569	0.00124648	0.0147477	0.0112854	llgl2/macf1a/plecb/limch1b	4
GO:0030833	GO:0030833	regulation of actin filament polymerization	10/577	102/18569	0.00127469	0.0149819	0.0114646	scinla/dbn1/svila/cdc42ep5/sptbn1/capgb/cttn/tmsb4x/nck1b/arpc5a	10
GO:0030178	GO:0030178	negative regulation of Wnt signaling pathway	9/577	85/18569	0.0012805	0.0149819	0.0114646	rgs3a/nkd1/grb10b/axin2/tle3a/gsk3ba/jupa/apc/grb10a	9
GO:0003171	GO:0003171	atrioventricular valve development	5/577	27/18569	0.00130337	0.0151652	0.0116049	adap2/llgl1/jupa/gata2a/tmsb4x	5
GO:0032869	GO:0032869	cellular response to insulin stimulus	6/577	40/18569	0.00136956	0.0158478	0.0121272	grb10b/cav2/lpin2/insig1/gsk3ba/grb10a	6
GO:0048925	GO:0048925	lateral line system development	12/577	140/18569	0.00142497	0.0163988	0.0125489	lef1/llgl2/cav1/esr1/s1pr2/llgl1/ackr3b/kif1b/gpr156/apc/gnb1b/smad5	12
GO:0006195	GO:0006195	purine nucleotide catabolic process	8/577	70/18569	0.00143689	0.0164462	0.0125851	hkdc1/aldocb/eno1a/pfkpa/pkma/gpia/gapdhs/tpi1b	8
GO:0008064	GO:0008064	regulation of actin polymerization or depolymerization	10/577	104/18569	0.00147827	0.0168283	0.0128776	scinla/dbn1/svila/cdc42ep5/sptbn1/capgb/cttn/tmsb4x/nck1b/arpc5a	10
GO:0061572	GO:0061572	actin filament bundle organization	7/577	55/18569	0.00150194	0.0170058	0.0130134	lcp1/rflnb/fscn1a/myh10/limk1b/limch1b/rhoab	7
GO:0048592	GO:0048592	eye morphogenesis	17/577	242/18569	0.001546	0.017234	0.013188	her9/afap1l2/tbx2b/agrn/efnb2a/cerkl/sema6a/zic2a/lamb1a/efnb1/apc/cdipt/tln1/phactr4b/sox4a/ptk2ab/cdc42	17
GO:0007173	GO:0007173	epidermal growth factor receptor signaling pathway	5/577	28/18569	0.00154664	0.017234	0.013188	hbegfb/afap1l2/hbegfa/rhbdf1a/ptk2bb	5
GO:0018210	GO:0018210	peptidyl-threonine modification	5/577	28/18569	0.00154664	0.017234	0.013188	eogt/hipk3b/gsk3ba/cdc42bpaa/rock2b	5
GO:0007368	GO:0007368	determination of left/right symmetry	20/577	307/18569	0.00155892	0.0172793	0.0132227	flt1/tbx2b/nkd1/adap2/apln/lamb1a/llgl1/skib/ahi1/gsk3ba/itgb1b/apc/rock2b/trib3/mcamb/sesn1/tmsb4x/wwtr1/smad5/cfl1	20
GO:0009199	GO:0009199	ribonucleoside triphosphate metabolic process	10/577	105/18569	0.00158953	0.0173529	0.013279	hkdc1/aldocb/eno1a/pfkpa/uck2a/pkma/gpia/gapdhs/ak1/tpi1b	10
GO:0002042	GO:0002042	cell migration involved in sprouting angiogenesis	4/577	17/18569	0.00159027	0.0173529	0.013279	cxcr4a/efnb2a/nrp1b/cdc42	4
GO:0039020	GO:0039020	pronephric nephron tubule development	4/577	17/18569	0.00159027	0.0173529	0.013279	mecom/etv4/tbx2b/etv5a	4
GO:0008285	GO:0008285	negative regulation of cell population proliferation	9/577	88/18569	0.00163723	0.0177732	0.0136006	igfbp1a/dll4/llgl2/cav2/cav1/etv5a/cdkn1bb/btg1/sh3bp4a	9
GO:0048882	GO:0048882	lateral line development	11/577	124/18569	0.0016872	0.0182217	0.0139438	lef1/llgl2/cav1/esr1/s1pr2/llgl1/ackr3b/gpr156/apc/gnb1b/smad5	11
GO:0001934	GO:0001934	positive regulation of protein phosphorylation	10/577	106/18569	0.00170749	0.0182537	0.0139683	adcyap1b/pdgfbb/kita/pgfb/pdgfba/il6r/axin2/pik3r5/il15/tpd52l1	10
GO:0030832	GO:0030832	regulation of actin filament length	10/577	106/18569	0.00170749	0.0182537	0.0139683	scinla/dbn1/svila/cdc42ep5/sptbn1/capgb/cttn/tmsb4x/nck1b/arpc5a	10
GO:0016052	GO:0016052	carbohydrate catabolic process	8/577	72/18569	0.001726	0.0183265	0.014024	hkdc1/aldocb/eno1a/pfkpa/pkma/gpia/gapdhs/tpi1b	8
GO:0090066	GO:0090066	regulation of anatomical structure size	18/577	266/18569	0.0017317	0.0183265	0.014024	sema5ba/sema3ga/scinla/sema7a/dbn1/sema3ab/avpr1ab/svila/slc12a2/acvrl1/cdc42ep5/ednraa/sptbn1/capgb/cttn/tmsb4x/nck1b/arpc5a	18
GO:0001755	GO:0001755	neural crest cell migration	10/577	107/18569	0.00183244	0.0191996	0.0146921	cxcr4a/sema5ba/sema3ga/lef1/nrp1b/sema7a/fscn1a/sema3ab/hif1ab/phactr4b	10
GO:0002011	GO:0002011	morphogenesis of an epithelial sheet	10/577	107/18569	0.00183244	0.0191996	0.0146921	fzd10/afap1l2/fscn1a/arhgef7b/tln1/rhocb/phactr4b/rhoab/sox4a/cfl1	10
GO:0042176	GO:0042176	regulation of protein catabolic process	8/577	73/18569	0.00188683	0.0196716	0.0150533	oaz2b/oaz2a/trib1/axin2/gsk3ba/rhbdf1a/apc/trib3	8
GO:0045595	GO:0045595	regulation of cell differentiation	28/577	498/18569	0.00193709	0.0200961	0.0153782	hey1/her9/sema5ba/sema3ga/prdm1a/hey2/qki2/lef1/rbpms2b/ccdc141/gdpd5a/llgl2/lpar2a/rflnb/sema7a/dbn1/rbpms2a/sema3ab/mef2ca/apc/plxnb3/arhgef1a/hapln3/jam2a/id1/foxl2b/ptbp1a/qkia	28
GO:0048675	GO:0048675	axon extension	10/577	108/18569	0.00196467	0.0202823	0.0155207	sema5ba/sema3ga/myo10l3/robo3/sema7a/myo9ab/dbn1/sema3ab/kif1b/fam53b	10
GO:0051247	GO:0051247	positive regulation of protein metabolic process	18/577	270/18569	0.00203997	0.0209569	0.0160369	adcyap1b/pdgfbb/oaz2b/kita/pgfb/pdgfba/oaz2a/il6r/trib1/axin2/pik3r5/il15/tpd52l1/gsk3ba/apc/trib3/hip1/nck1b	18
GO:0048048	GO:0048048	embryonic eye morphogenesis	7/577	58/18569	0.00205451	0.0210038	0.0160728	afap1l2/efnb2a/sema6a/efnb1/tln1/phactr4b/sox4a	7
GO:0001894	GO:0001894	tissue homeostasis	9/577	91/18569	0.00206955	0.0210554	0.0161123	foxf2b/her9/lef1/foxf2a/cdipt/tjp1a/ptbp1a/emc3/cdc42	9
GO:0090497	GO:0090497	mesenchymal cell migration	10/577	109/18569	0.00210449	0.0212559	0.0162657	cxcr4a/sema5ba/sema3ga/lef1/nrp1b/sema7a/fscn1a/sema3ab/hif1ab/phactr4b	10
GO:0060972	GO:0060972	left/right pattern formation	20/577	315/18569	0.00210944	0.0212559	0.0162657	flt1/tbx2b/nkd1/adap2/apln/lamb1a/llgl1/skib/ahi1/gsk3ba/itgb1b/apc/rock2b/trib3/mcamb/sesn1/tmsb4x/wwtr1/smad5/cfl1	20
GO:0030042	GO:0030042	actin filament depolymerization	6/577	44/18569	0.00226839	0.022443	0.0171741	scinla/cfl1l/svila/sptbn1/capgb/cfl1	6
GO:0030865	GO:0030865	cortical cytoskeleton organization	6/577	44/18569	0.00226839	0.022443	0.0171741	llgl2/llgl1/rhogb/rock2b/amotl2a/iqgap2	6
GO:0001933	GO:0001933	negative regulation of protein phosphorylation	7/577	59/18569	0.00226988	0.022443	0.0171741	cdkn1ca/spry4/pkig/cav1/cdkn1bb/nck1b/rasip1	7
GO:0072009	GO:0072009	nephron epithelium development	7/577	59/18569	0.00226988	0.022443	0.0171741	mecom/etv4/tbx2b/prkceb/etv5a/srgap2/iqgap2	7
GO:0035050	GO:0035050	embryonic heart tube development	14/577	188/18569	0.00228604	0.0224972	0.0172156	tbx3a/tbx2b/nkd1/adap2/s1pr2/llgl1/skib/kdrl/gsk3ba/apc/mef2cb/trib3/tmsb4x/smad5	14
GO:0032535	GO:0032535	regulation of cellular component size	15/577	209/18569	0.00232255	0.0227502	0.0174092	sema5ba/sema3ga/scinla/sema7a/dbn1/sema3ab/svila/slc12a2/cdc42ep5/sptbn1/capgb/cttn/tmsb4x/nck1b/arpc5a	15
GO:0018126	GO:0018126	protein hydroxylation	4/577	19/18569	0.00246532	0.0239266	0.0183094	p4ha1b/egln2/crtap/plod1a	4
GO:0018208	GO:0018208	peptidyl-proline modification	5/577	31/18569	0.00247673	0.0239266	0.0183094	p4ha1b/fkbp1ab/egln2/crtap/fkbp1aa	5
GO:0030866	GO:0030866	cortical actin cytoskeleton organization	5/577	31/18569	0.00247673	0.0239266	0.0183094	llgl2/llgl1/rock2b/amotl2a/iqgap2	5
GO:0016055	GO:0016055	Wnt signaling pathway	18/577	275/18569	0.00248902	0.0239355	0.0183162	fzd10/lef1/rgs3a/nkd1/bambia/grb10b/axin2/tle3a/csnk1g1/gsk3ba/tet3/fam53b/jupa/apc/tcf7l1b/grb10a/amotl2a/rhoab	18
GO:2000026	GO:2000026	regulation of multicellular organismal development	26/577	459/18569	0.00250081	0.0239395	0.0183193	hey1/her9/sema5ba/sema3ga/adgrb1a/hey2/pgfb/qki2/lef1/dll4/lpar2a/arhgap18/rflnb/sema7a/lama4/dbn1/s1pr2/sema3ab/hif1ab/gata2a/plxnb3/hapln3/id1/cdh5/kdr/qkia	26
GO:0060249	GO:0060249	anatomical structure homeostasis	9/577	94/18569	0.00258832	0.0246652	0.0188746	foxf2b/her9/lef1/foxf2a/cdipt/tjp1a/ptbp1a/emc3/cdc42	9
GO:0051261	GO:0051261	protein depolymerization	8/577	77/18569	0.00265173	0.0251479	0.019244	sh3gl3a/scinla/cfl1l/apc/svila/sptbn1/capgb/cfl1	8
GO:0001822	GO:0001822	kidney development	15/577	212/18569	0.00266286	0.0251479	0.019244	mecom/etv4/tbx2b/prkceb/podxl/jag2b/hdac5/myo1ca/etv5a/srgap2/six2a/tmsb4x/iqgap2/wwtr1/cdc42	15
GO:0198738	GO:0198738	cell-cell signaling by wnt	18/577	277/18569	0.00269045	0.025295	0.0193566	fzd10/lef1/rgs3a/nkd1/bambia/grb10b/axin2/tle3a/csnk1g1/gsk3ba/tet3/fam53b/jupa/apc/tcf7l1b/grb10a/amotl2a/rhoab	18
GO:0042326	GO:0042326	negative regulation of phosphorylation	7/577	61/18569	0.00275248	0.0257632	0.0197149	cdkn1ca/spry4/pkig/cav1/cdkn1bb/nck1b/rasip1	7
GO:0009205	GO:0009205	purine ribonucleoside triphosphate metabolic process	9/577	95/18569	0.00278244	0.0259284	0.0198413	hkdc1/aldocb/eno1a/pfkpa/pkma/gpia/gapdhs/ak1/tpi1b	9
GO:0120031	GO:0120031	plasma membrane bounded cell projection assembly	23/577	392/18569	0.00280789	0.0260503	0.0199345	cxcr4a/abcc4/nrp1b/flncb/podxl/llgl2/ablim1a/ift52/lamb1a/arhgef9b/appa/robo4/ahi1/srgap2/ehd1b/arhgef7b/cdc42ep5/mcamb/amotl2a/wwtr1/akap12b/cfl1/cdc42	23
GO:0006469	GO:0006469	negative regulation of protein kinase activity	6/577	46/18569	0.00285677	0.0260952	0.0199689	cdkn1ca/spry4/pkig/cav1/cdkn1bb/rasip1	6
GO:0033673	GO:0033673	negative regulation of kinase activity	6/577	46/18569	0.00285677	0.0260952	0.0199689	cdkn1ca/spry4/pkig/cav1/cdkn1bb/rasip1	6
GO:0038127	GO:0038127	ERBB signaling pathway	5/577	32/18569	0.0028615	0.0260952	0.0199689	hbegfb/afap1l2/hbegfa/rhbdf1a/ptk2bb	5
GO:0009166	GO:0009166	nucleotide catabolic process	8/577	78/18569	0.0028763	0.0260952	0.0199689	hkdc1/aldocb/eno1a/pfkpa/pkma/gpia/gapdhs/tpi1b	8
GO:0043434	GO:0043434	response to peptide hormone	8/577	78/18569	0.0028763	0.0260952	0.0199689	slc2a1a/slc2a1b/grb10b/cav2/lpin2/insig1/gsk3ba/grb10a	8
GO:0006935	GO:0006935	chemotaxis	15/577	214/18569	0.00291186	0.0260952	0.0199689	cxcr4a/sema5ba/sema3ga/ccl38.1/lrrc15/pgfb/rbpms2b/efnb2a/il6r/pik3cg/sema7a/rbpms2a/sema3ab/ackr3b/rhogb	15
GO:0042330	GO:0042330	taxis	15/577	214/18569	0.00291186	0.0260952	0.0199689	cxcr4a/sema5ba/sema3ga/ccl38.1/lrrc15/pgfb/rbpms2b/efnb2a/il6r/pik3cg/sema7a/rbpms2a/sema3ab/ackr3b/rhogb	15
GO:0072001	GO:0072001	renal system development	15/577	214/18569	0.00291186	0.0260952	0.0199689	mecom/etv4/tbx2b/prkceb/podxl/jag2b/hdac5/myo1ca/etv5a/srgap2/six2a/tmsb4x/iqgap2/wwtr1/cdc42	15
GO:0043410	GO:0043410	positive regulation of MAPK cascade	11/577	133/18569	0.00293486	0.0261899	0.0200413	adcyap1b/pdgfbb/ccl38.1/kita/mapkbp1/pdgfba/igf1ra/cav2/sema7a/pik3r5/tpd52l1	11
GO:0001936	GO:0001936	regulation of endothelial cell proliferation	4/577	20/18569	0.00300676	0.0267183	0.0204457	pgfb/dll4/cav2/cav1	4
GO:0046627	GO:0046627	negative regulation of insulin receptor signaling pathway	3/577	10/18569	0.00304205	0.0268057	0.0205126	grb10b/gsk3ba/grb10a	3
GO:1900077	GO:1900077	negative regulation of cellular response to insulin stimulus	3/577	10/18569	0.00304205	0.0268057	0.0205126	grb10b/gsk3ba/grb10a	3
GO:0072523	GO:0072523	purine-containing compound catabolic process	8/577	79/18569	0.00311541	0.0271583	0.0207824	hkdc1/aldocb/eno1a/pfkpa/pkma/gpia/gapdhs/tpi1b	8
GO:1901652	GO:1901652	response to peptide	8/577	79/18569	0.00311541	0.0271583	0.0207824	slc2a1a/slc2a1b/grb10b/cav2/lpin2/insig1/gsk3ba/grb10a	8
GO:0009141	GO:0009141	nucleoside triphosphate metabolic process	10/577	115/18569	0.00312075	0.0271583	0.0207824	hkdc1/aldocb/eno1a/pfkpa/uck2a/pkma/gpia/gapdhs/ak1/tpi1b	10
GO:0009953	GO:0009953	dorsal/ventral pattern formation	12/577	154/18569	0.00316958	0.0274697	0.0210207	zic2a/robo3/bambia/axin2/scinla/cav1/tsc22d3/skib/acvrl1/smad1/ptbp1a/smad5	12
GO:0051348	GO:0051348	negative regulation of transferase activity	6/577	47/18569	0.00319049	0.0275376	0.0210727	cdkn1ca/spry4/pkig/cav1/cdkn1bb/rasip1	6
GO:0048588	GO:0048588	developmental cell growth	11/577	135/18569	0.00329393	0.0283144	0.0216671	sema5ba/sema3ga/myo10l3/robo3/sema7a/myo9ab/dbn1/sema3ab/kif1b/fam53b/tmem108	11
GO:0032271	GO:0032271	regulation of protein polymerization	10/577	116/18569	0.00332281	0.0284465	0.0217682	scinla/dbn1/svila/cdc42ep5/sptbn1/capgb/cttn/tmsb4x/nck1b/arpc5a	10
GO:0070121	GO:0070121	Kupffer's vesicle development	8/577	80/18569	0.0033697	0.0287311	0.021986	cxcr4a/nkd1/llgl2/itgb1b/rab11a/rock2b/wwtr1/akap12b	8
GO:0072006	GO:0072006	nephron development	9/577	98/18569	0.00343462	0.0291666	0.0223192	mecom/etv4/tbx2b/prkceb/podxl/myo1ca/etv5a/srgap2/iqgap2	9
GO:0019362	GO:0019362	pyridine nucleotide metabolic process	8/577	81/18569	0.00363979	0.0306616	0.0234632	hkdc1/aldocb/eno1a/pfkpa/pkma/gpia/gapdhs/tpi1b	8
GO:0046496	GO:0046496	nicotinamide nucleotide metabolic process	8/577	81/18569	0.00363979	0.0306616	0.0234632	hkdc1/aldocb/eno1a/pfkpa/pkma/gpia/gapdhs/tpi1b	8
GO:0009144	GO:0009144	purine nucleoside triphosphate metabolic process	9/577	99/18569	0.00367682	0.0308501	0.0236075	hkdc1/aldocb/eno1a/pfkpa/pkma/gpia/gapdhs/ak1/tpi1b	9
GO:0061053	GO:0061053	somite development	12/577	157/18569	0.00370783	0.0309869	0.0237122	cxcr4a/lef1/efnb2a/rgs3a/cav1/tle3a/lamb1a/dlc/psd2/apc/mef2aa/rap1b	12
GO:0002244	GO:0002244	hematopoietic progenitor cell differentiation	11/577	138/18569	0.0038978	0.0323593	0.0247624	epas1a/epas1b/kita/hlx1/jag2b/hif1ab/dlc/notch1b/hdac7a/efna1b/rap1b	11
GO:0003143	GO:0003143	embryonic heart tube morphogenesis	12/577	158/18569	0.00390278	0.0323593	0.0247624	tbx2b/nkd1/adap2/s1pr2/llgl1/skib/gsk3ba/apc/mef2cb/trib3/tmsb4x/smad5	12
GO:0030041	GO:0030041	actin filament polymerization	10/577	119/18569	0.00399201	0.0329693	0.0252292	scinla/dbn1/svila/cdc42ep5/sptbn1/capgb/cttn/tmsb4x/nck1b/arpc5a	10
GO:0032350	GO:0032350	regulation of hormone metabolic process	3/577	11/18569	0.0040869	0.0334903	0.0256278	lef1/tle3a/apc	3
GO:0045638	GO:0045638	negative regulation of myeloid cell differentiation	3/577	11/18569	0.0040869	0.0334903	0.0256278	qki2/lpar2a/qkia	3
GO:1903825	GO:1903825	organic acid transmembrane transport	9/577	101/18569	0.00420127	0.0341616	0.0261416	slc7a5/slc5a8l/zgc:158423/slc16a1a/slc7a3a/slc3a2a/slc38a5b/lrrc8c/lrrc8ab	9
GO:1905039	GO:1905039	carboxylic acid transmembrane transport	9/577	101/18569	0.00420127	0.0341616	0.0261416	slc7a5/slc5a8l/zgc:158423/slc16a1a/slc7a3a/slc3a2a/slc38a5b/lrrc8c/lrrc8ab	9
GO:0001946	GO:0001946	lymphangiogenesis	6/577	50/18569	0.00436661	0.0353695	0.0270659	cxcr4a/dll4/kdrl/notch1b/mcamb/sox18	6
GO:0120032	GO:0120032	regulation of plasma membrane bounded cell projection assembly	7/577	67/18569	0.00467946	0.0377584	0.0288939	abcc4/nrp1b/podxl/lamb1a/appa/cdc42ep5/cdc42	7
GO:1901700	GO:1901700	response to oxygen-containing compound	21/577	363/18569	0.00492208	0.0395645	0.0302761	slc2a1a/slc2a1b/agrn/rxrab/grb10b/cav2/esr1/man1b1b/hif1ab/abhd2a/lpin2/insig1/chrnb2/gsk3ba/tet3/sult2st3/grb10a/sesn1/txndc12/rap1b/sh3bp4a	21
GO:0010975	GO:0010975	regulation of neuron projection development	12/577	163/18569	0.00500475	0.0400761	0.0306675	sema5ba/sema3ga/rbpms2b/sema7a/dbn1/rbpms2a/sema3ab/nedd4l/gsk3ba/plxnb3/pak2a/tfg	12
GO:0060537	GO:0060537	muscle tissue development	16/577	249/18569	0.00502864	0.0401148	0.0306972	csrp2/spry4/hey2/npr3/hspg2/cav1/myo9ab/myo18ab/itgb1b/mef2ca/mef2cb/jam2a/tln1/plecb/wwtr1/qkia	16
GO:0060491	GO:0060491	regulation of cell projection assembly	7/577	68/18569	0.00508016	0.0403729	0.0308946	abcc4/nrp1b/podxl/lamb1a/appa/cdc42ep5/cdc42	7
GO:0071456	GO:0071456	cellular response to hypoxia	4/577	23/18569	0.0051052	0.0404194	0.0309302	epas1a/epas1b/hif1ab/egln2	4
GO:0072524	GO:0072524	pyridine-containing compound metabolic process	8/577	86/18569	0.00525015	0.0408926	0.0312923	hkdc1/aldocb/eno1a/pfkpa/pkma/gpia/gapdhs/tpi1b	8
GO:0036303	GO:0036303	lymph vessel morphogenesis	6/577	52/18569	0.0053107	0.0408926	0.0312923	cxcr4a/dll4/kdrl/notch1b/mcamb/sox18	6
GO:0001952	GO:0001952	regulation of cell-matrix adhesion	3/577	12/18569	0.00532443	0.0408926	0.0312923	robo4/macf1a/limch1b	3
GO:0021555	GO:0021555	midbrain-hindbrain boundary morphogenesis	3/577	12/18569	0.00532443	0.0408926	0.0312923	myh10/cdc42se1/ptk2ab	3
GO:0043252	GO:0043252	sodium-independent organic anion transport	3/577	12/18569	0.00532443	0.0408926	0.0312923	slco1d1/slco1c1/slco5a1a	3
GO:0046626	GO:0046626	regulation of insulin receptor signaling pathway	3/577	12/18569	0.00532443	0.0408926	0.0312923	grb10b/gsk3ba/grb10a	3
GO:0048385	GO:0048385	regulation of retinoic acid receptor signaling pathway	3/577	12/18569	0.00532443	0.0408926	0.0312923	zic2a/zic2b/wwtr1	3
GO:0071786	GO:0071786	endoplasmic reticulum tubular network organization	3/577	12/18569	0.00532443	0.0408926	0.0312923	rtn1b/rtn1a/cdipt	3
GO:0098739	GO:0098739	import across plasma membrane	10/577	124/18569	0.00533973	0.0408926	0.0312923	ca2/zgc:158423/kcnj2a/slc7a3a/slc9a6b/slc3a2a/wnk1a/lrrc8c/lrrc8ab/slc12a2	10
GO:0048384	GO:0048384	retinoic acid receptor signaling pathway	5/577	37/18569	0.00545453	0.0416205	0.0318493	zic2a/rxrab/zic2b/apc/wwtr1	5
GO:0060218	GO:0060218	hematopoietic stem cell differentiation	8/577	87/18569	0.00562885	0.0427955	0.0327485	epas1a/epas1b/jag2b/hif1ab/dlc/notch1b/efna1b/rap1b	8
GO:1902532	GO:1902532	negative regulation of intracellular signal transduction	11/577	145/18569	0.00565245	0.0428203	0.0327675	spry4/mapkbp1/cerkl/spred2b/tnfaip8l1/gsk3ba/sesn1/akap12b/sh3bp4a/rasip1/dusp5	11
GO:0016331	GO:0016331	morphogenesis of embryonic epithelium	7/577	70/18569	0.00595824	0.0444867	0.0340427	pcdh19/afap1l2/nkd1/zic2a/tln1/phactr4b/sox4a	7
GO:0021602	GO:0021602	cranial nerve morphogenesis	4/577	24/18569	0.00597803	0.0444867	0.0340427	six3a/lrrn1/tuba1a/klf6a	4
GO:0036294	GO:0036294	cellular response to decreased oxygen levels	4/577	24/18569	0.00597803	0.0444867	0.0340427	epas1a/epas1b/hif1ab/egln2	4
GO:0061386	GO:0061386	closure of optic fissure	4/577	24/18569	0.00597803	0.0444867	0.0340427	afap1l2/tln1/phactr4b/sox4a	4
GO:0097581	GO:0097581	lamellipodium organization	4/577	24/18569	0.00597803	0.0444867	0.0340427	ablim1a/robo4/arhgef7b/mmp14b	4
GO:0051129	GO:0051129	negative regulation of cellular component organization	13/577	188/18569	0.00601918	0.0445796	0.0341137	sycp1/sema5ba/sema3ga/scinla/sema7a/sema3ab/dysf/gsk3ba/apc/svila/sptbn1/capgb/tmsb4x	13
GO:0030155	GO:0030155	regulation of cell adhesion	12/577	167/18569	0.00605402	0.0445796	0.0341137	mecom/podxl/lama4/il15/robo4/tet3/si:ch211-156j16.1/plxnb3/macf1a/cdh5/limch1b/ptk2bb	12
GO:0050767	GO:0050767	regulation of neurogenesis	12/577	167/18569	0.00605402	0.0445796	0.0341137	hey1/her9/sema5ba/sema3ga/hey2/lef1/sema7a/dbn1/sema3ab/plxnb3/hapln3/id1	12
GO:0045103	GO:0045103	intermediate filament-based process	5/577	38/18569	0.00612369	0.0446145	0.0341405	dspa/eppk1/fam83hb/macf1a/plecb	5
GO:0045104	GO:0045104	intermediate filament cytoskeleton organization	5/577	38/18569	0.00612369	0.0446145	0.0341405	dspa/eppk1/fam83hb/macf1a/plecb	5
GO:0060349	GO:0060349	bone morphogenesis	5/577	38/18569	0.00612369	0.0446145	0.0341405	prdm1a/ltbp1/mef2ca/mmp14b/rap1b	5
GO:0060284	GO:0060284	regulation of cell development	17/577	277/18569	0.0061435	0.0446145	0.0341405	hey1/her9/sema5ba/sema3ga/hey2/qki2/lef1/lpar2a/rflnb/sema7a/dbn1/sema3ab/plxnb3/hapln3/jam2a/id1/qkia	17
GO:1901699	GO:1901699	cellular response to nitrogen compound	11/577	147/18569	0.0062537	0.0452588	0.0346335	agrn/grb10b/cav2/lpin2/insig1/chrnb2/gsk3ba/grb10a/sesn1/rap1b/sh3bp4a	11
GO:0051345	GO:0051345	positive regulation of hydrolase activity	13/577	189/18569	0.00628646	0.04534	0.0346956	adcyap1b/tbc1d14/si:ch211-288d18.1/ccl38.1/rasgrp3/dock9b/si:dkeyp-19e1.3/agap1/arhgap29a/rgl2/dock6/rasgef1ba/hip1	13
GO:0016358	GO:0016358	dendrite development	6/577	54/18569	0.00639615	0.0458789	0.035108	rbpms2b/dbn1/rbpms2a/nedd4l/srgap2/scarf1	6
GO:0009880	GO:0009880	embryonic pattern specification	7/577	71/18569	0.00643752	0.0458789	0.035108	prdm1a/dlc/tcf7l1b/smad1/amotl2a/rap1b/smad5	7
GO:0072073	GO:0072073	kidney epithelium development	7/577	71/18569	0.00643752	0.0458789	0.035108	mecom/etv4/tbx2b/prkceb/etv5a/srgap2/iqgap2	7
GO:0032880	GO:0032880	regulation of protein localization	8/577	89/18569	0.00644832	0.0458789	0.035108	adcyap1b/nkd1/llgl2/llgl1/tmem35/rhbdf1a/ptk2aa/ptk2ab	8
GO:0019511	GO:0019511	peptidyl-proline hydroxylation	3/577	13/18569	0.00676353	0.0473333	0.036221	p4ha1b/egln2/crtap	3
GO:0042573	GO:0042573	retinoic acid metabolic process	3/577	13/18569	0.00676353	0.0473333	0.036221	lef1/tle3a/apc	3
GO:1900076	GO:1900076	regulation of cellular response to insulin stimulus	3/577	13/18569	0.00676353	0.0473333	0.036221	grb10b/gsk3ba/grb10a	3
GO:1901698	GO:1901698	response to nitrogen compound	16/577	257/18569	0.00676359	0.0473333	0.036221	slc2a1a/slc2a1b/agrn/grb10b/cav2/man1b1b/ecpas/lpin2/insig1/chrnb2/gsk3ba/grb10a/sesn1/erlec1/rap1b/sh3bp4a	16
GO:0060900	GO:0060900	embryonic camera-type eye formation	5/577	39/18569	0.0068485	0.0473333	0.036221	afap1l2/sema6a/tln1/phactr4b/sox4a	5
GO:0045765	GO:0045765	regulation of angiogenesis	8/577	90/18569	0.00689046	0.0473333	0.036221	adgrb1a/pgfb/dll4/arhgap18/hif1ab/gata2a/cdh5/kdr	8
GO:1901292	GO:1901292	nucleoside phosphate catabolic process	8/577	90/18569	0.00689046	0.0473333	0.036221	hkdc1/aldocb/eno1a/pfkpa/pkma/gpia/gapdhs/tpi1b	8
GO:0008286	GO:0008286	insulin receptor signaling pathway	4/577	25/18569	0.00694474	0.0473333	0.036221	grb10b/cav2/gsk3ba/grb10a	4
GO:0032436	GO:0032436	positive regulation of proteasomal ubiquitin-dependent protein catabolic process	4/577	25/18569	0.00694474	0.0473333	0.036221	trib1/axin2/gsk3ba/trib3	4
GO:0045746	GO:0045746	negative regulation of Notch signaling pathway	4/577	25/18569	0.00694474	0.0473333	0.036221	dll4/tcima/dlc/ptbp1a	4
GO:0071453	GO:0071453	cellular response to oxygen levels	4/577	25/18569	0.00694474	0.0473333	0.036221	epas1a/epas1b/hif1ab/egln2	4
GO:0010563	GO:0010563	negative regulation of phosphorus metabolic process	7/577	72/18569	0.00694491	0.0473333	0.036221	cdkn1ca/spry4/pkig/cav1/cdkn1bb/nck1b/rasip1	7
GO:0045936	GO:0045936	negative regulation of phosphate metabolic process	7/577	72/18569	0.00694491	0.0473333	0.036221	cdkn1ca/spry4/pkig/cav1/cdkn1bb/nck1b/rasip1	7
GO:0007029	GO:0007029	endoplasmic reticulum organization	6/577	55/18569	0.00699544	0.0473711	0.0362499	rtn1b/rtn1a/cdipt/emc4/emc3/reep5	6
GO:0050768	GO:0050768	negative regulation of neurogenesis	6/577	55/18569	0.00699544	0.0473711	0.0362499	her9/sema5ba/sema3ga/sema7a/sema3ab/id1	6
GO:0060560	GO:0060560	developmental growth involved in morphogenesis	13/577	193/18569	0.00745148	0.0502975	0.0384893	sema5ba/sema3ga/myo10l3/robo3/sema7a/myo9ab/dbn1/sema3ab/kif1b/fam53b/tmem108/cdh5/akap12b	13
GO:0003333	GO:0003333	amino acid transmembrane transport	7/577	73/18569	0.00748138	0.050338	0.0385202	slc7a5/zgc:158423/slc7a3a/slc3a2a/slc38a5b/lrrc8c/lrrc8ab	7
GO:0009896	GO:0009896	positive regulation of catabolic process	11/577	151/18569	0.00760612	0.0510143	0.0390378	oaz2b/plekhn1/oaz2a/trib1/axin2/gsk3ba/apc/trib3/sesn1/samd4a/sh3bp4a	11
GO:0048703	GO:0048703	embryonic viscerocranium morphogenesis	9/577	111/18569	0.00775356	0.0517693	0.0396155	cxcr4a/prdm1a/mecom/zic2a/hspg2/fscn1a/s1pr2/zic2b/tln1	9
GO:0045165	GO:0045165	cell fate commitment	13/577	194/18569	0.00776785	0.0517693	0.0396155	hey1/cdkn1ca/tbx21/tbx3a/prdm1a/kita/hey2/tbx2b/sox13/apc/tcf7l1b/gata2a/wwtr1	13
GO:0030111	GO:0030111	regulation of Wnt signaling pathway	12/577	173/18569	0.00794658	0.0527934	0.0403992	rgs3a/nkd1/bambia/grb10b/axin2/tle3a/csnk1g1/gsk3ba/fam53b/jupa/apc/grb10a	12
GO:0048013	GO:0048013	ephrin receptor signaling pathway	4/577	26/18569	0.00800932	0.0528766	0.0404628	efnb2a/efnb1/efna1b/efna1a	4
GO:2000060	GO:2000060	positive regulation of ubiquitin-dependent protein catabolic process	4/577	26/18569	0.00800932	0.0528766	0.0404628	trib1/axin2/gsk3ba/trib3	4
GO:0048593	GO:0048593	camera-type eye morphogenesis	13/577	195/18569	0.00809473	0.0532734	0.0407665	afap1l2/tbx2b/agrn/efnb2a/cerkl/sema6a/zic2a/efnb1/cdipt/tln1/phactr4b/sox4a/ptk2ab	13
GO:0021517	GO:0021517	ventral spinal cord development	6/577	57/18569	0.00831422	0.0540091	0.0413295	dll4/igf1ra/jag2b/dlc/notch1b/gata2a	6
GO:0030010	GO:0030010	establishment of cell polarity	6/577	57/18569	0.00831422	0.0540091	0.0413295	llgl2/myo9ab/llgl1/mmp14b/amotl2a/cdh5	6
GO:0034330	GO:0034330	cell junction organization	17/577	286/18569	0.00834091	0.0540091	0.0413295	ncam3/llgl2/cldn5b/ppfibp1a/myo9ab/dbn1/arhgef9b/ppfibp1b/rock2b/si:ch73-61d6.3/macf1a/tmem108/cdh5/tjp1a/plecb/limch1b/rasip1	17
GO:0016114	GO:0016114	terpenoid biosynthetic process	3/577	14/18569	0.00841168	0.0540091	0.0413295	lef1/tle3a/apc	3
GO:0021594	GO:0021594	rhombomere formation	3/577	14/18569	0.00841168	0.0540091	0.0413295	spry4/efnb2a/notch1b	3
GO:0060837	GO:0060837	blood vessel endothelial cell differentiation	3/577	14/18569	0.00841168	0.0540091	0.0413295	hey2/dlc/ets1	3
GO:0061300	GO:0061300	cerebellum vasculature development	3/577	14/18569	0.00841168	0.0540091	0.0413295	slc2a1a/nrp1b/cdh5	3
GO:0072148	GO:0072148	epithelial cell fate commitment	3/577	14/18569	0.00841168	0.0540091	0.0413295	hey2/tcf7l1b/wwtr1	3
GO:0000281	GO:0000281	mitotic cytokinesis	5/577	41/18569	0.00847403	0.0542441	0.0415093	dchs1b/myh10/rock2b/iqgap2/rhocb	5
GO:0009967	GO:0009967	positive regulation of signal transduction	23/577	431/18569	0.00866083	0.0552718	0.0422958	adcyap1b/pdgfbb/tirap/ccl38.1/afap1l2/kita/mapkbp1/pdgfba/bambia/arhgef3/igf1ra/cav2/sema7a/pik3r5/akap13/tsc22d3/csnk1g1/robo4/tpd52l1/fam53b/lpar6a/nck1b/akap12b	23
GO:0051051	GO:0051051	negative regulation of transport	6/577	58/18569	0.0090365	0.0568345	0.0434916	nkd1/wnk1a/nedd4l/dysf/rhbdf1a/rap1b	6
GO:0051961	GO:0051961	negative regulation of nervous system development	6/577	58/18569	0.0090365	0.0568345	0.0434916	her9/sema5ba/sema3ga/sema7a/sema3ab/id1	6
GO:0010243	GO:0010243	response to organonitrogen compound	14/577	220/18569	0.00907822	0.0568345	0.0434916	slc2a1a/slc2a1b/grb10b/cav2/man1b1b/ecpas/lpin2/insig1/gsk3ba/grb10a/sesn1/erlec1/rap1b/sh3bp4a	14
GO:0031401	GO:0031401	positive regulation of protein modification process	10/577	134/18569	0.0090829	0.0568345	0.0434916	adcyap1b/pdgfbb/kita/pgfb/pdgfba/il6r/axin2/pik3r5/il15/tpd52l1	10
GO:0043254	GO:0043254	regulation of protein-containing complex assembly	10/577	134/18569	0.0090829	0.0568345	0.0434916	scinla/dbn1/svila/cdc42ep5/sptbn1/capgb/cttn/tmsb4x/nck1b/arpc5a	10
GO:0016525	GO:0016525	negative regulation of angiogenesis	4/577	27/18569	0.00917557	0.0568345	0.0434916	adgrb1a/dll4/arhgap18/cdh5	4
GO:0018107	GO:0018107	peptidyl-threonine phosphorylation	4/577	27/18569	0.00917557	0.0568345	0.0434916	hipk3b/gsk3ba/cdc42bpaa/rock2b	4
GO:0022600	GO:0022600	digestive system process	4/577	27/18569	0.00917557	0.0568345	0.0434916	cav1/cdipt/ptbp1a/shank3b	4
GO:0051147	GO:0051147	regulation of muscle cell differentiation	4/577	27/18569	0.00917557	0.0568345	0.0434916	prdm1a/rbpms2b/rbpms2a/jam2a	4
GO:2000181	GO:2000181	negative regulation of blood vessel morphogenesis	4/577	27/18569	0.00917557	0.0568345	0.0434916	adgrb1a/dll4/arhgap18/cdh5	4
GO:0035850	GO:0035850	epithelial cell differentiation involved in kidney development	5/577	42/18569	0.00937913	0.0579251	0.0443261	etv4/prkceb/etv5a/srgap2/iqgap2	5
GO:0043086	GO:0043086	negative regulation of catalytic activity	9/577	115/18569	0.00968541	0.0596417	0.0456398	kng1/cdkn1ca/spry4/agrn/pkig/cav1/serpinh1a/cdkn1bb/rasip1	9
GO:0031400	GO:0031400	negative regulation of protein modification process	7/577	77/18569	0.00993707	0.061013	0.0466891	cdkn1ca/spry4/pkig/cav1/cdkn1bb/nck1b/rasip1	7
GO:0009725	GO:0009725	response to hormone	15/577	246/18569	0.0102564	0.0623272	0.0476948	slc2a1a/slc2a1b/slc31a1/grb10b/cav2/esr1/abhd2a/lpin2/insig1/gsk3ba/avpr1ab/sult2st3/grb10a/keap1a/ramp2	15
GO:0021603	GO:0021603	cranial nerve formation	3/577	15/18569	0.010275	0.0623272	0.0476948	lrrn1/tuba1a/klf6a	3
GO:0030512	GO:0030512	negative regulation of transforming growth factor beta receptor signaling pathway	3/577	15/18569	0.010275	0.0623272	0.0476948	ldlrad4a/bambia/skib	3
GO:0043535	GO:0043535	regulation of blood vessel endothelial cell migration	3/577	15/18569	0.010275	0.0623272	0.0476948	dll4/nrp1b/cdc42	3
GO:0003014	GO:0003014	renal system process	5/577	43/18569	0.0103486	0.0623272	0.0476948	dachd/prkceb/aqp1a.1/ehd1b/iqgap2	5
GO:0061005	GO:0061005	cell differentiation involved in kidney development	5/577	43/18569	0.0103486	0.0623272	0.0476948	etv4/prkceb/etv5a/srgap2/iqgap2	5
GO:0048920	GO:0048920	posterior lateral line neuromast primordium migration	4/577	28/18569	0.0104471	0.0623272	0.0476948	esr1/ackr3b/apc/gnb1b	4
GO:0072080	GO:0072080	nephron tubule development	4/577	28/18569	0.0104471	0.0623272	0.0476948	mecom/etv4/tbx2b/etv5a	4
GO:1901343	GO:1901343	negative regulation of vasculature development	4/577	28/18569	0.0104471	0.0623272	0.0476948	adgrb1a/dll4/arhgap18/cdh5	4
GO:1901800	GO:1901800	positive regulation of proteasomal protein catabolic process	4/577	28/18569	0.0104471	0.0623272	0.0476948	trib1/axin2/gsk3ba/trib3	4
GO:0048705	GO:0048705	skeletal system morphogenesis	14/577	224/18569	0.0105317	0.0626546	0.0479453	cxcr4a/prdm1a/mecom/zic2a/hspg2/ltbp1/rflnb/fscn1a/s1pr2/zic2b/mef2ca/mmp14b/tln1/rap1b	14
GO:0002064	GO:0002064	epithelial cell development	8/577	98/18569	0.011297	0.0668297	0.0511403	slc2a1a/myt1b/prkceb/lama4/srgap2/tjp1a/iqgap2/ptk2ab	8
GO:1901342	GO:1901342	regulation of vasculature development	8/577	98/18569	0.011297	0.0668297	0.0511403	adgrb1a/pgfb/dll4/arhgap18/hif1ab/gata2a/cdh5/kdr	8
GO:0071417	GO:0071417	cellular response to organonitrogen compound	9/577	118/18569	0.0113573	0.0669986	0.0512695	grb10b/cav2/lpin2/insig1/gsk3ba/grb10a/sesn1/rap1b/sh3bp4a	9
GO:0002072	GO:0002072	optic cup morphogenesis involved in camera-type eye development	4/577	29/18569	0.0118271	0.0691886	0.0529453	afap1l2/tln1/phactr4b/sox4a	4
GO:0048883	GO:0048883	neuromast primordium migration	4/577	29/18569	0.0118271	0.0691886	0.0529453	esr1/ackr3b/apc/gnb1b	4
GO:1903052	GO:1903052	positive regulation of proteolysis involved in protein catabolic process	4/577	29/18569	0.0118271	0.0691886	0.0529453	trib1/axin2/gsk3ba/trib3	4
GO:0043010	GO:0043010	camera-type eye development	25/577	495/18569	0.0122433	0.0710221	0.0543484	cadm1b/adcyap1b/afap1l2/tbx2b/agrn/ccdc141/efnb2a/cerkl/sema6a/zic2a/igf1ra/hbegfa/llgl1/myo6b/efnb1/apc/cdipt/tln1/wwtr1/copz1/emc3/phactr4b/sox4a/ptk2ab/cdc42	25
GO:0003159	GO:0003159	morphogenesis of an endothelium	3/577	16/18569	0.0123585	0.0710221	0.0543484	egfra/sh3kbp1/cdh5	3
GO:0006970	GO:0006970	response to osmotic stress	3/577	16/18569	0.0123585	0.0710221	0.0543484	ca2/slc31a1/aqp1a.1	3
GO:0048859	GO:0048859	formation of anatomical boundary	3/577	16/18569	0.0123585	0.0710221	0.0543484	efnb2a/apc/notch1b	3
GO:0061154	GO:0061154	endothelial tube morphogenesis	3/577	16/18569	0.0123585	0.0710221	0.0543484	egfra/sh3kbp1/cdh5	3
GO:0072554	GO:0072554	blood vessel lumenization	3/577	16/18569	0.0123585	0.0710221	0.0543484	egfra/sh3kbp1/cdh5	3
GO:0048483	GO:0048483	autonomic nervous system development	6/577	62/18569	0.0123766	0.0710221	0.0543484	cxcr4a/tbx2b/fscn1a/tubb5/ednraa/phactr4b	6
GO:0035265	GO:0035265	organ growth	5/577	45/18569	0.0124889	0.0712781	0.0545443	hey2/npr3/cav1/klf6a/rap1b	5
GO:0071526	GO:0071526	semaphorin-plexin signaling pathway	5/577	45/18569	0.0124889	0.0712781	0.0545443	sema5ba/sema3ga/sema7a/sema3ab/plxnb3	5
GO:0097529	GO:0097529	myeloid leukocyte migration	9/577	120/18569	0.0125861	0.0716386	0.0548202	ccl38.1/pgfb/il6r/pik3cg/hif1ab/cd99/gnb1b/cdc42l/cdc42	9
GO:0007369	GO:0007369	gastrulation	16/577	276/18569	0.0128418	0.0728974	0.0557834	cxcr4a/tbx2b/apln/s1pr2/etv5a/mylipa/itgb1b/arhgef7b/mmp14b/rap1b/rhoab/smad5/dusp5/cfl1/ptk2ab/cdc42	16
GO:0002687	GO:0002687	positive regulation of leukocyte migration	4/577	30/18569	0.0133188	0.0742725	0.0568357	pgfb/il6r/cd99/gnb1b	4
GO:0034314	GO:0034314	Arp2/3 complex-mediated actin nucleation	4/577	30/18569	0.0133188	0.0742725	0.0568357	arfip2a/arpc1b/wasf3b/arpc5a	4
GO:0043588	GO:0043588	skin development	4/577	30/18569	0.0133188	0.0742725	0.0568357	llgl2/llgl1/dspa/rps6ka3a	4
GO:0048813	GO:0048813	dendrite morphogenesis	4/577	30/18569	0.0133188	0.0742725	0.0568357	rbpms2b/dbn1/rbpms2a/nedd4l	4
GO:0048843	GO:0048843	negative regulation of axon extension involved in axon guidance	4/577	30/18569	0.0133188	0.0742725	0.0568357	sema5ba/sema3ga/sema7a/sema3ab	4
GO:0061326	GO:0061326	renal tubule development	4/577	30/18569	0.0133188	0.0742725	0.0568357	mecom/etv4/tbx2b/etv5a	4
GO:0021515	GO:0021515	cell differentiation in spinal cord	6/577	63/18569	0.013331	0.0742725	0.0568357	dll4/igf1ra/jag2b/dlc/notch1b/gata2a	6
GO:0060070	GO:0060070	canonical Wnt signaling pathway	12/577	186/18569	0.0136206	0.0756861	0.0579174	fzd10/lef1/nkd1/bambia/axin2/tle3a/csnk1g1/gsk3ba/fam53b/jupa/apc/tcf7l1b	12
GO:1901880	GO:1901880	negative regulation of protein depolymerization	5/577	46/18569	0.0136635	0.0757248	0.0579471	scinla/apc/svila/sptbn1/capgb	5
GO:0060173	GO:0060173	limb development	7/577	82/18569	0.0137746	0.0761398	0.0582646	prdm1a/etv4/lef1/dll4/llgl1/etv5a/apc	7
GO:0048793	GO:0048793	pronephros development	10/577	143/18569	0.0139279	0.0767858	0.058759	mecom/etv4/tbx2b/podxl/jag2b/hdac5/etv5a/six2a/tmsb4x/wwtr1	10
GO:0007179	GO:0007179	transforming growth factor beta receptor signaling pathway	6/577	64/18569	0.0143356	0.0784177	0.0600077	ldlrad4a/bambia/skib/acvrl1/smad1/smad5	6
GO:0071559	GO:0071559	response to transforming growth factor beta	6/577	64/18569	0.0143356	0.0784177	0.0600077	ldlrad4a/bambia/skib/acvrl1/smad1/smad5	6
GO:0071560	GO:0071560	cellular response to transforming growth factor beta stimulus	6/577	64/18569	0.0143356	0.0784177	0.0600077	ldlrad4a/bambia/skib/acvrl1/smad1/smad5	6
GO:0001569	GO:0001569	branching involved in blood vessel morphogenesis	3/577	17/18569	0.014666	0.0796048	0.0609162	dll4/igfbp7/sema3ab	3
GO:0034109	GO:0034109	homotypic cell-cell adhesion	3/577	17/18569	0.014666	0.0796048	0.0609162	si:ch211-156j16.1/cd99/esama	3
GO:0060232	GO:0060232	delamination	3/577	17/18569	0.014666	0.0796048	0.0609162	mecom/tet3/cdh5	3
GO:0140694	GO:0140694	non-membrane-bounded organelle assembly	15/577	257/18569	0.0148177	0.0802214	0.061388	cxcr4a/csrp2/qki2/flncb/mef2d/myo18ab/myl9a/itgb1b/mef2ca/mef2aa/tln1/plecb/tpm3/mapre1b/qkia	15
GO:0039019	GO:0039019	pronephric nephron development	5/577	47/18569	0.0149103	0.0803099	0.0614557	mecom/etv4/tbx2b/podxl/etv5a	5
GO:0061136	GO:0061136	regulation of proteasomal protein catabolic process	5/577	47/18569	0.0149103	0.0803099	0.0614557	trib1/axin2/gsk3ba/rhbdf1a/trib3	5
GO:1902904	GO:1902904	negative regulation of supramolecular fiber organization	6/577	65/18569	0.0153918	0.0826915	0.0632782	scinla/apc/svila/sptbn1/capgb/tmsb4x	6
GO:0021903	GO:0021903	rostrocaudal neural tube patterning	5/577	48/18569	0.016231	0.0865381	0.0662217	myh10/apc/tcf7l1b/cdc42se1/ptk2ab	5
GO:0030308	GO:0030308	negative regulation of cell growth	5/577	48/18569	0.016231	0.0865381	0.0662217	sema5ba/sema3ga/sema7a/sema3ab/sh3bp4a	5
GO:0031290	GO:0031290	retinal ganglion cell axon guidance	5/577	48/18569	0.016231	0.0865381	0.0662217	rbpms2b/rbpms2a/lamb1a/ahi1/apc	5
GO:0045944	GO:0045944	positive regulation of transcription by RNA polymerase II	18/577	332/18569	0.0162726	0.0865408	0.0662238	adcyap1b/rxrab/sox7/zfpm2b/mrtfba/mef2d/lpin2/tet3/mef2ca/jupa/mef2cb/mef2aa/gata2a/mrtfbb/si:ch73-61d6.3/sox18/wwtr1/sox4a	18
GO:0071375	GO:0071375	cellular response to peptide hormone stimulus	6/577	66/18569	0.0165007	0.0873125	0.0668143	grb10b/cav2/lpin2/insig1/gsk3ba/grb10a	6
GO:1901653	GO:1901653	cellular response to peptide	6/577	66/18569	0.0165007	0.0873125	0.0668143	grb10b/cav2/lpin2/insig1/gsk3ba/grb10a	6
GO:0007586	GO:0007586	digestion	4/577	32/18569	0.0166484	0.0878737	0.0672438	cav1/cdipt/ptbp1a/shank3b	4
GO:0006820	GO:0006820	monoatomic anion transport	9/577	126/18569	0.0168668	0.0888038	0.0679555	slc5a8l/abcc4/ttyh2l/ttyh3b/lrrc8c/lrrc8ab/slc12a2/ano5b/vdac3	9
GO:0003181	GO:0003181	atrioventricular valve morphogenesis	3/577	18/18569	0.0172003	0.0894414	0.0684435	jupa/gata2a/tmsb4x	3
GO:0021554	GO:0021554	optic nerve development	3/577	18/18569	0.0172003	0.0894414	0.0684435	six3a/tuba1a/klf6a	3
GO:0030032	GO:0030032	lamellipodium assembly	3/577	18/18569	0.0172003	0.0894414	0.0684435	ablim1a/robo4/arhgef7b	3
GO:0043114	GO:0043114	regulation of vascular permeability	3/577	18/18569	0.0172003	0.0894414	0.0684435	itga4/itgb1b/tjp1a	3
GO:0051058	GO:0051058	negative regulation of small GTPase mediated signal transduction	3/577	18/18569	0.0172003	0.0894414	0.0684435	spry4/akap12b/rasip1	3
GO:0048884	GO:0048884	neuromast development	7/577	86/18569	0.0175301	0.0905549	0.0692955	lef1/llgl2/cav1/s1pr2/llgl1/gpr156/smad5	7
GO:0018212	GO:0018212	peptidyl-tyrosine modification	5/577	49/18569	0.0176273	0.0905549	0.0692955	il6r/cav1/il15/aatka/tpst1	5
GO:0051017	GO:0051017	actin filament bundle assembly	5/577	49/18569	0.0176273	0.0905549	0.0692955	lcp1/fscn1a/limk1b/limch1b/rhoab	5
GO:0030509	GO:0030509	BMP signaling pathway	9/577	127/18569	0.0176724	0.0905549	0.0692955	igfbp3/tbx2b/bambia/tsc22d3/skib/acvrl1/smad1/wwtr1/smad5	9
GO:0071772	GO:0071772	response to BMP	9/577	127/18569	0.0176724	0.0905549	0.0692955	igfbp3/tbx2b/bambia/tsc22d3/skib/acvrl1/smad1/wwtr1/smad5	9
GO:0071773	GO:0071773	cellular response to BMP stimulus	9/577	127/18569	0.0176724	0.0905549	0.0692955	igfbp3/tbx2b/bambia/tsc22d3/skib/acvrl1/smad1/wwtr1/smad5	9
GO:0051960	GO:0051960	regulation of nervous system development	12/577	193/18569	0.0177411	0.0906861	0.0693959	hey1/her9/sema5ba/sema3ga/hey2/lef1/sema7a/dbn1/sema3ab/plxnb3/hapln3/id1	12
GO:0044092	GO:0044092	negative regulation of molecular function	10/577	149/18569	0.0180926	0.092259	0.0705996	kng1/cdkn1ca/spry4/agrn/pkig/cav1/serpinh1a/cdkn1bb/nedd4l/rasip1	10
GO:0051223	GO:0051223	regulation of protein transport	4/577	33/18569	0.0184913	0.0938378	0.0718077	nkd1/llgl2/llgl1/rhbdf1a	4
GO:0060914	GO:0060914	heart formation	4/577	33/18569	0.0184913	0.0938378	0.0718077	mef2d/lamb1a/mef2ca/mef2cb	4
GO:0050817	GO:0050817	coagulation	6/577	68/18569	0.0188811	0.0955857	0.0731453	kng1/f2rl2/bambia/anxa5b/si:ch211-156j16.1/esama	6
GO:0061371	GO:0061371	determination of heart left/right asymmetry	13/577	218/18569	0.0190662	0.0957763	0.0732911	tbx2b/nkd1/adap2/apln/llgl1/skib/gsk3ba/apc/trib3/tmsb4x/wwtr1/smad5/cfl1	13
GO:0032870	GO:0032870	cellular response to hormone stimulus	12/577	195/18569	0.0190743	0.0957763	0.0732911	slc31a1/grb10b/cav2/esr1/abhd2a/lpin2/insig1/gsk3ba/avpr1ab/grb10a/keap1a/ramp2	12
GO:0010977	GO:0010977	negative regulation of neuron projection development	5/577	50/18569	0.0191007	0.0957763	0.0732911	sema5ba/sema3ga/sema7a/sema3ab/gsk3ba	5
GO:1903050	GO:1903050	regulation of proteolysis involved in protein catabolic process	5/577	50/18569	0.0191007	0.0957763	0.0732911	trib1/axin2/gsk3ba/rhbdf1a/trib3	5
GO:0048738	GO:0048738	cardiac muscle tissue development	8/577	108/18569	0.0193706	0.096899	0.0741502	hey2/npr3/cav1/itgb1b/mef2ca/mef2cb/tln1/wwtr1	8
GO:0050900	GO:0050900	leukocyte migration	10/577	151/18569	0.0196658	0.0979107	0.0749244	tbx21/ccl38.1/pgfb/il6r/pik3cg/hif1ab/cd99/gnb1b/cdc42l/cdc42	10
GO:0051258	GO:0051258	protein polymerization	10/577	151/18569	0.0196658	0.0979107	0.0749244	scinla/dbn1/svila/cdc42ep5/sptbn1/capgb/cttn/tmsb4x/nck1b/arpc5a	10
GO:0021593	GO:0021593	rhombomere morphogenesis	3/577	19/18569	0.0199631	0.0980006	0.0749932	spry4/efnb2a/notch1b	3
GO:0030168	GO:0030168	platelet activation	3/577	19/18569	0.0199631	0.0980006	0.0749932	bambia/si:ch211-156j16.1/esama	3
GO:0048009	GO:0048009	insulin-like growth factor receptor signaling pathway	3/577	19/18569	0.0199631	0.0980006	0.0749932	igfbp1a/igfbp3/igf1ra	3
GO:0060038	GO:0060038	cardiac muscle cell proliferation	3/577	19/18569	0.0199631	0.0980006	0.0749932	hey2/npr3/cav1	3
GO:0060350	GO:0060350	endochondral bone morphogenesis	3/577	19/18569	0.0199631	0.0980006	0.0749932	prdm1a/mmp14b/rap1b	3
GO:0089718	GO:0089718	amino acid import across plasma membrane	3/577	19/18569	0.0199631	0.0980006	0.0749932	zgc:158423/slc7a3a/slc3a2a	3
GO:0051494	GO:0051494	negative regulation of cytoskeleton organization	6/577	69/18569	0.0201549	0.0984833	0.0753626	scinla/apc/svila/sptbn1/capgb/tmsb4x	6
GO:0060348	GO:0060348	bone development	6/577	69/18569	0.0201549	0.0984833	0.0753626	prdm1a/ltbp1/rflnb/mef2ca/mmp14b/rap1b	6
GO:0021915	GO:0021915	neural tube development	8/577	109/18569	0.0203579	0.0992449	0.0759454	pcdh19/zic2a/myh10/apc/tcf7l1b/cdc42se1/phactr4b/ptk2ab	8
GO:0032007	GO:0032007	negative regulation of TOR signaling	4/577	34/18569	0.0204558	0.0994917	0.0761342	tnfaip8l1/gsk3ba/sesn1/sh3bp4a	4
GO:0032101	GO:0032101	regulation of response to external stimulus	16/577	292/18569	0.0207272	0.100518	0.0769199	cadm1b/kng1/sema5ba/tirap/sema3ga/pgfb/rbpms2b/dcbld1/efnb2a/nrp1b/sc:d189/il6r/sema7a/cav1/rbpms2a/sema3ab	16
GO:0021510	GO:0021510	spinal cord development	7/577	89/18569	0.020783	0.100518	0.0769199	dll4/igf1ra/jag2b/dlc/notch1b/gata2a/rnf220a	7
GO:0048871	GO:0048871	multicellular organismal-level homeostasis	15/577	268/18569	0.0208101	0.100518	0.0769199	foxf2b/her9/hdac9b/lef1/lpar2a/foxf2a/arhgef12b/aqp1a.1/klf6a/gata2a/cdipt/tjp1a/ptbp1a/emc3/cdc42	15
GO:0009628	GO:0009628	response to abiotic stimulus	19/577	367/18569	0.0213018	0.102568	0.0784883	ca2/slc45a2/igfbp1a/epas1a/epas1b/pgfb/plekhn1/ldha/nrp1b/slc31a1/apln/hif1ab/lamb1a/egln2/myo6b/perp/aqp1a.1/ucp2/alpl	19
GO:0014706	GO:0014706	striated muscle tissue development	8/577	110/18569	0.0213805	0.102568	0.0784883	hey2/npr3/cav1/itgb1b/mef2ca/mef2cb/tln1/wwtr1	8
GO:0021700	GO:0021700	developmental maturation	8/577	110/18569	0.0213805	0.102568	0.0784883	zdhhc20a/rflnb/abhd2a/klf6a/slc12a2/macf1a/scarf1/ddx5	8
GO:0035107	GO:0035107	appendage morphogenesis	6/577	70/18569	0.0214859	0.102839	0.0786959	prdm1a/etv4/lef1/etv5a/apc/plod1a	6
GO:0051248	GO:0051248	negative regulation of protein metabolic process	12/577	199/18569	0.0219635	0.104887	0.0802629	kng1/cdkn1ca/spry4/agrn/pkig/cav1/trim3a/serpinh1a/cdkn1bb/samd4a/nck1b/rasip1	12
GO:0043242	GO:0043242	negative regulation of protein-containing complex disassembly	5/577	52/18569	0.0222849	0.106181	0.081253	scinla/apc/svila/sptbn1/capgb	5
GO:0032434	GO:0032434	regulation of proteasomal ubiquitin-dependent protein catabolic process	4/577	35/18569	0.0225438	0.106931	0.0818267	trib1/axin2/gsk3ba/trib3	4
GO:0050922	GO:0050922	negative regulation of chemotaxis	4/577	35/18569	0.0225438	0.106931	0.0818267	sema5ba/sema3ga/sema7a/sema3ab	4
GO:0003179	GO:0003179	heart valve morphogenesis	3/577	20/18569	0.0229554	0.107431	0.0822098	jupa/gata2a/tmsb4x	3
GO:0010594	GO:0010594	regulation of endothelial cell migration	3/577	20/18569	0.0229554	0.107431	0.0822098	dll4/nrp1b/cdc42	3
GO:0030038	GO:0030038	contractile actin filament bundle assembly	3/577	20/18569	0.0229554	0.107431	0.0822098	limk1b/limch1b/rhoab	3
GO:0036302	GO:0036302	atrioventricular canal development	3/577	20/18569	0.0229554	0.107431	0.0822098	tbx2b/dchs1b/tmsb4x	3
GO:0043149	GO:0043149	stress fiber assembly	3/577	20/18569	0.0229554	0.107431	0.0822098	limk1b/limch1b/rhoab	3
GO:0045666	GO:0045666	positive regulation of neuron differentiation	3/577	20/18569	0.0229554	0.107431	0.0822098	prdm1a/gdpd5a/arhgef1a	3
GO:0030837	GO:0030837	negative regulation of actin filament polymerization	5/577	53/18569	0.0239984	0.111078	0.0850007	scinla/svila/sptbn1/capgb/tmsb4x	5
GO:0031345	GO:0031345	negative regulation of cell projection organization	5/577	53/18569	0.0239984	0.111078	0.0850007	sema5ba/sema3ga/sema7a/sema3ab/gsk3ba	5
GO:0032272	GO:0032272	negative regulation of protein polymerization	5/577	53/18569	0.0239984	0.111078	0.0850007	scinla/svila/sptbn1/capgb/tmsb4x	5
GO:0045926	GO:0045926	negative regulation of growth	5/577	53/18569	0.0239984	0.111078	0.0850007	sema5ba/sema3ga/sema7a/sema3ab/sh3bp4a	5
GO:1901879	GO:1901879	regulation of protein depolymerization	5/577	53/18569	0.0239984	0.111078	0.0850007	scinla/apc/svila/sptbn1/capgb	5
GO:0050770	GO:0050770	regulation of axonogenesis	7/577	92/18569	0.0244336	0.112845	0.0863522	sema5ba/sema3ga/sema7a/dbn1/sema3ab/plxnb3/pak2a	7
GO:0006639	GO:0006639	acylglycerol metabolic process	5/577	54/18569	0.0257946	0.11861	0.0907641	slc7a3a/dgkza/abhd2a/lipeb/lpin2	5
GO:1902905	GO:1902905	positive regulation of supramolecular fiber organization	5/577	54/18569	0.0257946	0.11861	0.0907641	cdc42ep5/wasf3b/nck1b/limk1b/limch1b	5
GO:0010647	GO:0010647	positive regulation of cell communication	23/577	478/18569	0.0260775	0.118636	0.0907837	adcyap1b/pdgfbb/tirap/ccl38.1/afap1l2/kita/mapkbp1/pdgfba/bambia/arhgef3/igf1ra/cav2/sema7a/pik3r5/akap13/tsc22d3/csnk1g1/robo4/tpd52l1/fam53b/lpar6a/nck1b/akap12b	23
GO:0023056	GO:0023056	positive regulation of signaling	23/577	478/18569	0.0260775	0.118636	0.0907837	adcyap1b/pdgfbb/tirap/ccl38.1/afap1l2/kita/mapkbp1/pdgfba/bambia/arhgef3/igf1ra/cav2/sema7a/pik3r5/akap13/tsc22d3/csnk1g1/robo4/tpd52l1/fam53b/lpar6a/nck1b/akap12b	23
GO:0021546	GO:0021546	rhombomere development	3/577	21/18569	0.0261773	0.118636	0.0907837	spry4/efnb2a/notch1b	3
GO:0035924	GO:0035924	cellular response to vascular endothelial growth factor stimulus	3/577	21/18569	0.0261773	0.118636	0.0907837	pgfb/nrp1b/kdr	3
GO:0048264	GO:0048264	determination of ventral identity	3/577	21/18569	0.0261773	0.118636	0.0907837	robo3/acvrl1/smad5	3
GO:0055017	GO:0055017	cardiac muscle tissue growth	3/577	21/18569	0.0261773	0.118636	0.0907837	hey2/npr3/cav1	3
GO:0045229	GO:0045229	external encapsulating structure organization	11/577	181/18569	0.0261945	0.118636	0.0907837	mmp25a/col5a3a/ltbp1/col4a1/col4a2/lamb1b/lamb1a/serpinh1a/mmp14b/crtap/wwtr1	11
GO:0008015	GO:0008015	blood circulation	15/577	277/18569	0.0269494	0.121675	0.0931094	hbegfb/flt1/tbx2b/itga4/gja5a/apln/crip2/bin1b/itgb1b/avpr1ab/acvrl1/ednraa/ccm2l/tjp1a/adma	15
GO:0046530	GO:0046530	photoreceptor cell differentiation	8/577	115/18569	0.0270423	0.121675	0.0931094	her9/tbx2b/cerkl/llgl2/ahi1/apc/cdipt/cdc42	8
GO:0030517	GO:0030517	negative regulation of axon extension	4/577	37/18569	0.0270966	0.121675	0.0931094	sema5ba/sema3ga/sema7a/sema3ab	4
GO:0060037	GO:0060037	pharyngeal system development	4/577	37/18569	0.0270966	0.121675	0.0931094	igfbp3/prdm1a/fscn1a/smad5	4
GO:0006638	GO:0006638	neutral lipid metabolic process	5/577	55/18569	0.0276745	0.123623	0.0946003	slc7a3a/dgkza/abhd2a/lipeb/lpin2	5
GO:0051495	GO:0051495	positive regulation of cytoskeleton organization	5/577	55/18569	0.0276745	0.123623	0.0946003	cdc42ep5/wasf3b/nck1b/limk1b/limch1b	5
GO:0015711	GO:0015711	organic anion transport	15/577	278/18569	0.0277066	0.123623	0.0946003	slc2a1a/slc2a1b/slc7a5/slc5a8l/slco1d1/zgc:158423/slc16a1a/slco1c1/abcc4/slc7a3a/slc3a2a/slco5a1a/slc38a5b/lrrc8c/lrrc8ab	15
GO:0060341	GO:0060341	regulation of cellular localization	8/577	116/18569	0.0282884	0.125952	0.0963825	adcyap1b/nkd1/llgl2/llgl1/tmem35/rhbdf1a/ptk2aa/ptk2ab	8
GO:0003018	GO:0003018	vascular process in circulatory system	6/577	75/18569	0.0290314	0.128987	0.0987054	itga4/itgb1b/avpr1ab/acvrl1/ednraa/tjp1a	6
GO:0001819	GO:0001819	positive regulation of cytokine production	4/577	38/18569	0.029564	0.129186	0.0988571	tirap/afap1l2/sema7a/il15	4
GO:0003146	GO:0003146	heart jogging	4/577	38/18569	0.029564	0.129186	0.0988571	nkd1/adap2/gsk3ba/apc	4
GO:0030901	GO:0030901	midbrain development	4/577	38/18569	0.029564	0.129186	0.0988571	zic2a/zic2b/apc/tcf7l1b	4
GO:0050919	GO:0050919	negative chemotaxis	4/577	38/18569	0.029564	0.129186	0.0988571	sema3ga/lrrc15/sema7a/sema3ab	4
GO:0051693	GO:0051693	actin filament capping	4/577	38/18569	0.029564	0.129186	0.0988571	scinla/svila/sptbn1/capgb	4
GO:2000058	GO:2000058	regulation of ubiquitin-dependent protein catabolic process	4/577	38/18569	0.029564	0.129186	0.0988571	trib1/axin2/gsk3ba/trib3	4
GO:0048754	GO:0048754	branching morphogenesis of an epithelial tube	3/577	22/18569	0.0296281	0.129186	0.0988571	dll4/igfbp7/sema3ab	3
GO:0050708	GO:0050708	regulation of protein secretion	3/577	22/18569	0.0296281	0.129186	0.0988571	llgl2/llgl1/rhbdf1a	3
GO:2000242	GO:2000242	negative regulation of reproductive process	3/577	22/18569	0.0296281	0.129186	0.0988571	sycp1/dchs1b/ptbp1a	3
GO:0071695	GO:0071695	anatomical structure maturation	7/577	96/18569	0.0299537	0.130336	0.0997372	rflnb/abhd2a/klf6a/slc12a2/macf1a/scarf1/ddx5	7
GO:0001501	GO:0001501	skeletal system development	20/577	407/18569	0.0300387	0.130436	0.099814	cxcr4a/igfbp3/prdm1a/mecom/zic2a/hspg2/ltbp1/rflnb/fscn1a/s1pr2/zic2b/skib/mef2ca/apc/mmp14b/ednraa/hapln3/tln1/wwtr1/rap1b	20
GO:0021532	GO:0021532	neural tube patterning	5/577	57/18569	0.0316897	0.136276	0.104283	myh10/apc/tcf7l1b/cdc42se1/ptk2ab	5
GO:0045664	GO:0045664	regulation of neuron differentiation	5/577	57/18569	0.0316897	0.136276	0.104283	prdm1a/ccdc141/gdpd5a/arhgef1a/id1	5
GO:0090090	GO:0090090	negative regulation of canonical Wnt signaling pathway	5/577	57/18569	0.0316897	0.136276	0.104283	nkd1/axin2/tle3a/gsk3ba/apc	5
GO:0003013	GO:0003013	circulatory system process	15/577	283/18569	0.0317308	0.136276	0.104283	hbegfb/flt1/tbx2b/itga4/gja5a/apln/crip2/bin1b/itgb1b/avpr1ab/acvrl1/ednraa/ccm2l/tjp1a/adma	15
GO:0045893	GO:0045893	positive regulation of DNA-templated transcription	23/577	488/18569	0.0319723	0.136276	0.104283	adcyap1b/tbx21/tbx3a/afap1l2/tbx2b/rxrab/sox7/zfpm2b/mrtfba/mef2d/lpin2/tet3/mef2ca/jupa/mef2cb/mef2aa/gata2a/mrtfbb/si:ch73-61d6.3/sox18/wwtr1/sox4a/smad5	23
GO:1902680	GO:1902680	positive regulation of RNA biosynthetic process	23/577	488/18569	0.0319723	0.136276	0.104283	adcyap1b/tbx21/tbx3a/afap1l2/tbx2b/rxrab/sox7/zfpm2b/mrtfba/mef2d/lpin2/tet3/mef2ca/jupa/mef2cb/mef2aa/gata2a/mrtfbb/si:ch73-61d6.3/sox18/wwtr1/sox4a/smad5	23
GO:0001947	GO:0001947	heart looping	9/577	141/18569	0.0320735	0.136276	0.104283	tbx2b/adap2/llgl1/skib/gsk3ba/apc/trib3/tmsb4x/smad5	9
GO:0030834	GO:0030834	regulation of actin filament depolymerization	4/577	39/18569	0.03216	0.136276	0.104283	scinla/svila/sptbn1/capgb	4
GO:0030835	GO:0030835	negative regulation of actin filament depolymerization	4/577	39/18569	0.03216	0.136276	0.104283	scinla/svila/sptbn1/capgb	4
GO:0045010	GO:0045010	actin nucleation	4/577	39/18569	0.03216	0.136276	0.104283	arfip2a/arpc1b/wasf3b/arpc5a	4
GO:0048841	GO:0048841	regulation of axon extension involved in axon guidance	4/577	39/18569	0.03216	0.136276	0.104283	sema5ba/sema3ga/sema7a/sema3ab	4
GO:0050771	GO:0050771	negative regulation of axonogenesis	4/577	39/18569	0.03216	0.136276	0.104283	sema5ba/sema3ga/sema7a/sema3ab	4
GO:0009798	GO:0009798	axis specification	6/577	77/18569	0.0324815	0.137086	0.104903	prdm1a/axin2/mmp14b/ccm2l/macf1a/rap1b	6
GO:0030522	GO:0030522	intracellular receptor signaling pathway	6/577	77/18569	0.0324815	0.137086	0.104903	zic2a/rxrab/esr1/zic2b/apc/wwtr1	6
GO:0010632	GO:0010632	regulation of epithelial cell migration	3/577	23/18569	0.0333065	0.139174	0.1065	dll4/nrp1b/cdc42	3
GO:0014855	GO:0014855	striated muscle cell proliferation	3/577	23/18569	0.0333065	0.139174	0.1065	hey2/npr3/cav1	3
GO:0032011	GO:0032011	ARF protein signal transduction	3/577	23/18569	0.0333065	0.139174	0.1065	git1/psd2/psda	3
GO:0032012	GO:0032012	regulation of ARF protein signal transduction	3/577	23/18569	0.0333065	0.139174	0.1065	git1/psd2/psda	3
GO:1902622	GO:1902622	regulation of neutrophil migration	3/577	23/18569	0.0333065	0.139174	0.1065	il6r/cd99/gnb1b	3
GO:0006006	GO:0006006	glucose metabolic process	5/577	58/18569	0.0338268	0.140789	0.107736	hkdc1/pfkpa/gpia/gapdhs/tpi1b	5
GO:0090630	GO:0090630	activation of GTPase activity	5/577	58/18569	0.0338268	0.140789	0.107736	tbc1d14/si:ch211-288d18.1/si:dkeyp-19e1.3/agap1/arhgap29a	5
GO:0021675	GO:0021675	nerve development	6/577	78/18569	0.0343022	0.142486	0.109035	sema5ba/six3a/lrrn1/tuba1a/kif1b/klf6a	6
GO:0015804	GO:0015804	neutral amino acid transport	4/577	40/18569	0.0348855	0.14434	0.110453	slc7a5/zgc:158423/slc3a2a/slc38a5b	4
GO:0048645	GO:0048645	animal organ formation	4/577	40/18569	0.0348855	0.14434	0.110453	mef2d/lamb1a/mef2ca/mef2cb	4
GO:0031589	GO:0031589	cell-substrate adhesion	8/577	121/18569	0.0351154	0.144722	0.110746	itga4/lamb1b/lamb1a/robo4/myo18ab/itgb1b/macf1a/limch1b	8
GO:0060828	GO:0060828	regulation of canonical Wnt signaling pathway	8/577	121/18569	0.0351154	0.144722	0.110746	nkd1/bambia/axin2/tle3a/csnk1g1/gsk3ba/fam53b/apc	8
GO:0031333	GO:0031333	negative regulation of protein-containing complex assembly	5/577	59/18569	0.0360512	0.144998	0.110957	scinla/svila/sptbn1/capgb/tmsb4x	5
GO:0001558	GO:0001558	regulation of cell growth	7/577	100/18569	0.0362575	0.144998	0.110957	sema5ba/sema3ga/igfbp7/sema7a/dbn1/sema3ab/sh3bp4a	7
GO:0001709	GO:0001709	cell fate determination	2/577	10/18569	0.036766	0.144998	0.110957	prdm1a/tbx2b	2
GO:0009651	GO:0009651	response to salt stress	2/577	10/18569	0.036766	0.144998	0.110957	ca2/slc31a1	2
GO:0010766	GO:0010766	negative regulation of sodium ion transport	2/577	10/18569	0.036766	0.144998	0.110957	wnk1a/nedd4l	2
GO:0030277	GO:0030277	maintenance of gastrointestinal epithelium	2/577	10/18569	0.036766	0.144998	0.110957	cdipt/ptbp1a	2
GO:0032328	GO:0032328	alanine transport	2/577	10/18569	0.036766	0.144998	0.110957	zgc:158423/slc3a2a	2
GO:0045823	GO:0045823	positive regulation of heart contraction	2/577	10/18569	0.036766	0.144998	0.110957	apln/adma	2
GO:0048008	GO:0048008	platelet-derived growth factor receptor signaling pathway	2/577	10/18569	0.036766	0.144998	0.110957	pdgfbb/pdgfba	2
GO:0048041	GO:0048041	focal adhesion assembly	2/577	10/18569	0.036766	0.144998	0.110957	macf1a/limch1b	2
GO:0051492	GO:0051492	regulation of stress fiber assembly	2/577	10/18569	0.036766	0.144998	0.110957	limk1b/limch1b	2
GO:0051893	GO:0051893	regulation of focal adhesion assembly	2/577	10/18569	0.036766	0.144998	0.110957	macf1a/limch1b	2
GO:0060467	GO:0060467	negative regulation of fertilization	2/577	10/18569	0.036766	0.144998	0.110957	dchs1b/ptbp1a	2
GO:0060468	GO:0060468	prevention of polyspermy	2/577	10/18569	0.036766	0.144998	0.110957	dchs1b/ptbp1a	2
GO:0070365	GO:0070365	hepatocyte differentiation	2/577	10/18569	0.036766	0.144998	0.110957	tbx2b/apc	2
GO:0070593	GO:0070593	dendrite self-avoidance	2/577	10/18569	0.036766	0.144998	0.110957	robo3/robo4	2
GO:0090049	GO:0090049	regulation of cell migration involved in sprouting angiogenesis	2/577	10/18569	0.036766	0.144998	0.110957	nrp1b/cdc42	2
GO:0090109	GO:0090109	regulation of cell-substrate junction assembly	2/577	10/18569	0.036766	0.144998	0.110957	macf1a/limch1b	2
GO:0098719	GO:0098719	sodium ion import across plasma membrane	2/577	10/18569	0.036766	0.144998	0.110957	ca2/slc9a6b	2
GO:0150116	GO:0150116	regulation of cell-substrate junction organization	2/577	10/18569	0.036766	0.144998	0.110957	macf1a/limch1b	2
GO:1902106	GO:1902106	negative regulation of leukocyte differentiation	2/577	10/18569	0.036766	0.144998	0.110957	qki2/qkia	2
GO:1902667	GO:1902667	regulation of axon guidance	2/577	10/18569	0.036766	0.144998	0.110957	rbpms2b/rbpms2a	2
GO:1903524	GO:1903524	positive regulation of blood circulation	2/577	10/18569	0.036766	0.144998	0.110957	apln/adma	2
GO:0006887	GO:0006887	exocytosis	10/577	168/18569	0.0372942	0.146807	0.112341	llgl2/dchs1b/exoc6b/llgl1/sdf4/exoc3l1/rab11a/stxbp2/ptbp1a/rap1b	10
GO:0090504	GO:0090504	epiboly	6/577	80/18569	0.0381381	0.149848	0.114669	fzd10/fscn1a/arhgef7b/rhocb/rhoab/cfl1	6
GO:0034329	GO:0034329	cell junction assembly	10/577	169/18569	0.0385894	0.15134	0.11581	llgl2/cldn5b/arhgef9b/rock2b/si:ch73-61d6.3/macf1a/cdh5/tjp1a/plecb/limch1b	10
GO:0048736	GO:0048736	appendage development	8/577	124/18569	0.0397054	0.155427	0.118938	prdm1a/etv4/lef1/dll4/llgl1/etv5a/apc/plod1a	8
GO:0071363	GO:0071363	cellular response to growth factor stimulus	15/577	292/18569	0.0400273	0.156396	0.119679	igfbp3/spry4/pgfb/tbx2b/dll4/ldlrad4a/nrp1b/bambia/tsc22d3/skib/acvrl1/smad1/wwtr1/kdr/smad5	15
GO:0050878	GO:0050878	regulation of body fluid levels	6/577	81/18569	0.0401544	0.156602	0.119837	kng1/f2rl2/bambia/si:ch211-156j16.1/aqp1a.1/esama	6
GO:0030917	GO:0030917	midbrain-hindbrain boundary development	4/577	42/18569	0.0407262	0.157814	0.120764	myh10/apc/cdc42se1/ptk2ab	4
GO:0070201	GO:0070201	regulation of establishment of protein localization	4/577	42/18569	0.0407262	0.157814	0.120764	nkd1/llgl2/llgl1/rhbdf1a	4
GO:1902475	GO:1902475	L-alpha-amino acid transmembrane transport	4/577	42/18569	0.0407262	0.157814	0.120764	zgc:158423/slc7a3a/slc3a2a/slc38a5b	4
GO:0021545	GO:0021545	cranial nerve development	5/577	61/18569	0.0407648	0.157814	0.120764	six3a/lrrn1/tuba1a/kif1b/klf6a	5
GO:0070848	GO:0070848	response to growth factor	15/577	293/18569	0.0410366	0.157999	0.120906	igfbp3/spry4/pgfb/tbx2b/dll4/ldlrad4a/nrp1b/bambia/tsc22d3/skib/acvrl1/smad1/wwtr1/kdr/smad5	15
GO:0001885	GO:0001885	endothelial cell development	3/577	25/18569	0.0413377	0.157999	0.120906	slc2a1a/lama4/tjp1a	3
GO:0010565	GO:0010565	regulation of cellular ketone metabolic process	3/577	25/18569	0.0413377	0.157999	0.120906	lef1/tle3a/apc	3
GO:0030225	GO:0030225	macrophage differentiation	3/577	25/18569	0.0413377	0.157999	0.120906	qki2/kif1b/qkia	3
GO:0051016	GO:0051016	barbed-end actin filament capping	3/577	25/18569	0.0413377	0.157999	0.120906	scinla/svila/capgb	3
GO:0060419	GO:0060419	heart growth	3/577	25/18569	0.0413377	0.157999	0.120906	hey2/npr3/cav1	3
GO:0061138	GO:0061138	morphogenesis of a branching epithelium	3/577	25/18569	0.0413377	0.157999	0.120906	dll4/igfbp7/sema3ab	3
GO:0007517	GO:0007517	muscle organ development	12/577	219/18569	0.0414191	0.158023	0.120924	spry4/hspg2/myo9ab/lama4/lamb1a/myo18ab/dysf/jam2a/tln1/plecb/wwtr1/qkia	12
GO:0046434	GO:0046434	organophosphate catabolic process	8/577	126/18569	0.0429782	0.163532	0.12514	hkdc1/aldocb/eno1a/pfkpa/pkma/gpia/gapdhs/tpi1b	8
GO:0048640	GO:0048640	negative regulation of developmental growth	4/577	43/18569	0.0438418	0.163532	0.12514	sema5ba/sema3ga/sema7a/sema3ab	4
GO:0055013	GO:0055013	cardiac muscle cell development	4/577	43/18569	0.0438418	0.163532	0.12514	itgb1b/mef2ca/mef2cb/tln1	4
GO:0009310	GO:0009310	amine catabolic process	2/577	11/18569	0.044028	0.163532	0.12514	hnmt/sat1a.2	2
GO:0018401	GO:0018401	peptidyl-proline hydroxylation to 4-hydroxy-L-proline	2/577	11/18569	0.044028	0.163532	0.12514	p4ha1b/egln2	2
GO:0019471	GO:0019471	4-hydroxyproline metabolic process	2/577	11/18569	0.044028	0.163532	0.12514	p4ha1b/egln2	2
GO:0019755	GO:0019755	one-carbon compound transport	2/577	11/18569	0.044028	0.163532	0.12514	ca2/aqp1a.1	2
GO:0031033	GO:0031033	myosin filament organization	2/577	11/18569	0.044028	0.163532	0.12514	mef2d/mef2ca	2
GO:0042402	GO:0042402	cellular biogenic amine catabolic process	2/577	11/18569	0.044028	0.163532	0.12514	hnmt/sat1a.2	2
GO:0042531	GO:0042531	positive regulation of tyrosine phosphorylation of STAT protein	2/577	11/18569	0.044028	0.163532	0.12514	il6r/il15	2
GO:0046323	GO:0046323	glucose import	2/577	11/18569	0.044028	0.163532	0.12514	slc2a1a/slc2a1b	2
GO:0072132	GO:0072132	mesenchyme morphogenesis	2/577	11/18569	0.044028	0.163532	0.12514	apc/prkd2	2
GO:1903707	GO:1903707	negative regulation of hemopoiesis	2/577	11/18569	0.044028	0.163532	0.12514	qki2/qkia	2
GO:1903828	GO:1903828	negative regulation of protein localization	2/577	11/18569	0.044028	0.163532	0.12514	nkd1/rhbdf1a	2
GO:2001222	GO:2001222	regulation of neuron migration	2/577	11/18569	0.044028	0.163532	0.12514	sema3ab/srgap2	2
GO:0048644	GO:0048644	muscle organ morphogenesis	3/577	26/18569	0.0456849	0.168498	0.12894	myo18ab/dysf/wwtr1	3
GO:0085029	GO:0085029	extracellular matrix assembly	3/577	26/18569	0.0456849	0.168498	0.12894	lamb1b/lamb1a/mmp14b	3
GO:1902017	GO:1902017	regulation of cilium assembly	3/577	26/18569	0.0456849	0.168498	0.12894	abcc4/lamb1a/appa	3
GO:1905517	GO:1905517	macrophage migration	3/577	26/18569	0.0456849	0.168498	0.12894	hif1ab/cdc42l/cdc42	3
GO:0141091	GO:0141091	transforming growth factor beta receptor superfamily signaling pathway	11/577	200/18569	0.0483755	0.178058	0.136256	igfbp3/tbx2b/ldlrad4a/bambia/fscn1a/tsc22d3/skib/acvrl1/smad1/wwtr1/smad5	11
GO:1902115	GO:1902115	regulation of organelle assembly	5/577	64/18569	0.0485041	0.178058	0.136256	tbc1d14/abcc4/lamb1a/arhgef9b/appa	5
GO:0048701	GO:0048701	embryonic cranial skeleton morphogenesis	10/577	176/18569	0.0485306	0.178058	0.136256	cxcr4a/prdm1a/mecom/zic2a/hspg2/fscn1a/s1pr2/zic2b/tln1/rap1b	10
GO:1901136	GO:1901136	carbohydrate derivative catabolic process	9/577	153/18569	0.0496502	0.181827	0.13914	hkdc1/aldocb/eno1a/pfkpa/man1b1b/pkma/gpia/gapdhs/tpi1b	9
GO:0032984	GO:0032984	protein-containing complex disassembly	8/577	130/18569	0.0500464	0.181827	0.13914	sh3gl3a/scinla/cfl1l/apc/svila/sptbn1/capgb/cfl1	8
GO:0035282	GO:0035282	segmentation	8/577	130/18569	0.0500464	0.181827	0.13914	lef1/efnb2a/cav1/dlc/apc/mef2aa/tcf7l1b/rap1b	8
GO:0010810	GO:0010810	regulation of cell-substrate adhesion	3/577	27/18569	0.0502486	0.181827	0.13914	robo4/macf1a/limch1b	3
GO:0017015	GO:0017015	regulation of transforming growth factor beta receptor signaling pathway	3/577	27/18569	0.0502486	0.181827	0.13914	ldlrad4a/bambia/skib	3
GO:0072015	GO:0072015	podocyte development	3/577	27/18569	0.0502486	0.181827	0.13914	prkceb/srgap2/iqgap2	3
GO:0072310	GO:0072310	glomerular epithelial cell development	3/577	27/18569	0.0502486	0.181827	0.13914	prkceb/srgap2/iqgap2	3
GO:1903844	GO:1903844	regulation of cellular response to transforming growth factor beta stimulus	3/577	27/18569	0.0502486	0.181827	0.13914	ldlrad4a/bambia/skib	3
GO:0032787	GO:0032787	monocarboxylic acid metabolic process	15/577	302/18569	0.0509497	0.182316	0.139514	hkdc1/aldocb/slc7a3a/lef1/eno1a/ldha/pfkpa/tle3a/abhd2a/lpin2/pkma/apc/gpia/gapdhs/tpi1b	15
GO:0007596	GO:0007596	blood coagulation	5/577	65/18569	0.0512635	0.182316	0.139514	kng1/f2rl2/bambia/si:ch211-156j16.1/esama	5
GO:0030516	GO:0030516	regulation of axon extension	5/577	65/18569	0.0512635	0.182316	0.139514	sema5ba/sema3ga/sema7a/dbn1/sema3ab	5
GO:0002690	GO:0002690	positive regulation of leukocyte chemotaxis	2/577	12/18569	0.0517687	0.182316	0.139514	pgfb/il6r	2
GO:0007343	GO:0007343	egg activation	2/577	12/18569	0.0517687	0.182316	0.139514	dchs1b/ptbp1a	2
GO:0010595	GO:0010595	positive regulation of endothelial cell migration	2/577	12/18569	0.0517687	0.182316	0.139514	nrp1b/cdc42	2
GO:0021654	GO:0021654	rhombomere boundary formation	2/577	12/18569	0.0517687	0.182316	0.139514	efnb2a/notch1b	2
GO:0032233	GO:0032233	positive regulation of actin filament bundle assembly	2/577	12/18569	0.0517687	0.182316	0.139514	limk1b/limch1b	2
GO:0042509	GO:0042509	regulation of tyrosine phosphorylation of STAT protein	2/577	12/18569	0.0517687	0.182316	0.139514	il6r/il15	2
GO:0043567	GO:0043567	regulation of insulin-like growth factor receptor signaling pathway	2/577	12/18569	0.0517687	0.182316	0.139514	igfbp1a/igfbp3	2
GO:0048799	GO:0048799	animal organ maturation	2/577	12/18569	0.0517687	0.182316	0.139514	rflnb/slc12a2	2
GO:0048922	GO:0048922	posterior lateral line neuromast deposition	2/577	12/18569	0.0517687	0.182316	0.139514	lef1/smad5	2
GO:0060351	GO:0060351	cartilage development involved in endochondral bone morphogenesis	2/577	12/18569	0.0517687	0.182316	0.139514	prdm1a/rap1b	2
GO:0071711	GO:0071711	basement membrane organization	2/577	12/18569	0.0517687	0.182316	0.139514	lamb1b/lamb1a	2
GO:0071816	GO:0071816	tail-anchored membrane protein insertion into ER membrane	2/577	12/18569	0.0517687	0.182316	0.139514	emc4/emc3	2
GO:0072014	GO:0072014	proximal tubule development	2/577	12/18569	0.0517687	0.182316	0.139514	mecom/tbx2b	2
GO:0001756	GO:0001756	somitogenesis	7/577	109/18569	0.0534749	0.18801	0.143871	lef1/efnb2a/cav1/dlc/apc/mef2aa/rap1b	7
GO:0031346	GO:0031346	positive regulation of cell projection organization	6/577	87/18569	0.0536584	0.188341	0.144125	nrp1b/sema7a/dbn1/cdc42ep5/plxnb3/cdc42	6
GO:0018108	GO:0018108	peptidyl-tyrosine phosphorylation	4/577	46/18569	0.0539678	0.188678	0.144383	il6r/cav1/il15/aatka	4
GO:0055006	GO:0055006	cardiac cell development	4/577	46/18569	0.0539678	0.188678	0.144383	itgb1b/mef2ca/mef2cb/tln1	4
GO:0007599	GO:0007599	hemostasis	5/577	66/18569	0.0541129	0.188678	0.144383	kng1/f2rl2/bambia/si:ch211-156j16.1/esama	5
GO:0072175	GO:0072175	epithelial tube formation	5/577	66/18569	0.0541129	0.188678	0.144383	pcdh19/igfbp3/zic2a/phactr4b/smad5	5
GO:0007178	GO:0007178	transmembrane receptor protein serine/threonine kinase signaling pathway	11/577	204/18569	0.0543034	0.18903	0.144652	igfbp3/tbx2b/ldlrad4a/bambia/fscn1a/tsc22d3/skib/acvrl1/smad1/wwtr1/smad5	11
GO:0030198	GO:0030198	extracellular matrix organization	10/577	180/18569	0.0549195	0.190544	0.145811	mmp25a/col5a3a/ltbp1/col4a1/col4a2/lamb1b/lamb1a/serpinh1a/mmp14b/crtap	10
GO:0043062	GO:0043062	extracellular structure organization	10/577	180/18569	0.0549195	0.190544	0.145811	mmp25a/col5a3a/ltbp1/col4a1/col4a2/lamb1b/lamb1a/serpinh1a/mmp14b/crtap	10
GO:0008299	GO:0008299	isoprenoid biosynthetic process	3/577	28/18569	0.0550248	0.190596	0.14585	lef1/tle3a/apc	3
GO:0010639	GO:0010639	negative regulation of organelle organization	7/577	110/18569	0.055656	0.192466	0.147281	sycp1/scinla/apc/svila/sptbn1/capgb/tmsb4x	7
GO:0007229	GO:0007229	integrin-mediated signaling pathway	5/577	67/18569	0.0570523	0.196971	0.150728	itga4/sema7a/itgb1b/phactr4b/cdc42	5
GO:0015807	GO:0015807	L-amino acid transport	4/577	47/18569	0.057601	0.19757	0.151187	zgc:158423/slc7a3a/slc3a2a/slc38a5b	4
GO:0036465	GO:0036465	synaptic vesicle recycling	4/577	47/18569	0.057601	0.19757	0.151187	itsn2a/sh3gl3a/git1/itsn2b	4
GO:0048846	GO:0048846	axon extension involved in axon guidance	4/577	47/18569	0.057601	0.19757	0.151187	sema5ba/sema3ga/sema7a/sema3ab	4
GO:1902284	GO:1902284	neuron projection extension involved in neuron projection guidance	4/577	47/18569	0.057601	0.19757	0.151187	sema5ba/sema3ga/sema7a/sema3ab	4
GO:0042461	GO:0042461	photoreceptor cell development	6/577	89/18569	0.0587028	0.201021	0.153828	her9/tbx2b/cerkl/llgl2/ahi1/cdc42	6
GO:0007260	GO:0007260	tyrosine phosphorylation of STAT protein	2/577	13/18569	0.0599514	0.202531	0.154983	il6r/il15	2
GO:0030388	GO:0030388	fructose 1,6-bisphosphate metabolic process	2/577	13/18569	0.0599514	0.202531	0.154983	aldocb/pfkpa	2
GO:0045685	GO:0045685	regulation of glial cell differentiation	2/577	13/18569	0.0599514	0.202531	0.154983	qki2/qkia	2
GO:0048814	GO:0048814	regulation of dendrite morphogenesis	2/577	13/18569	0.0599514	0.202531	0.154983	dbn1/nedd4l	2
GO:0048923	GO:0048923	posterior lateral line neuromast hair cell differentiation	2/577	13/18569	0.0599514	0.202531	0.154983	s1pr2/gpr156	2
GO:0070527	GO:0070527	platelet aggregation	2/577	13/18569	0.0599514	0.202531	0.154983	si:ch211-156j16.1/esama	2
GO:0002274	GO:0002274	myeloid leukocyte activation	3/577	29/18569	0.0600091	0.202531	0.154983	sc:d189/il15/dysf	3
GO:0003094	GO:0003094	glomerular filtration	3/577	29/18569	0.0600091	0.202531	0.154983	dachd/prkceb/iqgap2	3
GO:0120034	GO:0120034	positive regulation of plasma membrane bounded cell projection assembly	3/577	29/18569	0.0600091	0.202531	0.154983	nrp1b/cdc42ep5/cdc42	3
GO:0007160	GO:0007160	cell-matrix adhesion	6/577	90/18569	0.0613277	0.20665	0.158135	itga4/robo4/myo18ab/itgb1b/macf1a/limch1b	6
GO:0043244	GO:0043244	regulation of protein-containing complex disassembly	5/577	69/18569	0.0632011	0.212622	0.162705	scinla/apc/svila/sptbn1/capgb	5
GO:0030199	GO:0030199	collagen fibril organization	3/577	30/18569	0.0651969	0.21812	0.166912	ltbp1/serpinh1a/crtap	3
GO:0033002	GO:0033002	muscle cell proliferation	3/577	30/18569	0.0651969	0.21812	0.166912	hey2/npr3/cav1	3
GO:0043277	GO:0043277	apoptotic cell clearance	3/577	30/18569	0.0651969	0.21812	0.166912	adgrb1a/cerkl/rab14	3
GO:0048484	GO:0048484	enteric nervous system development	4/577	49/18569	0.0652495	0.21812	0.166912	tbx2b/tubb5/ednraa/phactr4b	4
GO:0006909	GO:0006909	phagocytosis	5/577	70/18569	0.06641	0.221296	0.169343	adgrb1a/cerkl/dysf/rab14/ywhaba	5
GO:0070374	GO:0070374	positive regulation of ERK1 and ERK2 cascade	5/577	70/18569	0.06641	0.221296	0.169343	adcyap1b/pdgfbb/ccl38.1/pdgfba/sema7a	5
GO:0009894	GO:0009894	regulation of catabolic process	14/577	288/18569	0.0666448	0.221488	0.16949	oaz2b/plekhn1/oaz2a/trib1/axin2/gsk3ba/rhbdf1a/apc/trib3/keap1a/sesn1/samd4a/sh3bp4a/qkia	14
GO:0006821	GO:0006821	chloride transport	6/577	92/18569	0.066783	0.221488	0.16949	slc5a8l/abcc4/ttyh2l/ttyh3b/slc12a2/ano5b	6
GO:0032102	GO:0032102	negative regulation of response to external stimulus	6/577	92/18569	0.066783	0.221488	0.16949	kng1/sema5ba/sema3ga/sc:d189/sema7a/sema3ab	6
GO:0003157	GO:0003157	endocardium development	2/577	14/18569	0.0685414	0.225544	0.172594	itga4/apc	2
GO:0032231	GO:0032231	regulation of actin filament bundle assembly	2/577	14/18569	0.0685414	0.225544	0.172594	limk1b/limch1b	2
GO:0042116	GO:0042116	macrophage activation	2/577	14/18569	0.0685414	0.225544	0.172594	sc:d189/dysf	2
GO:0072530	GO:0072530	purine-containing compound transmembrane transport	2/577	14/18569	0.0685414	0.225544	0.172594	lrrc8c/lrrc8ab	2
GO:0098508	GO:0098508	endothelial to hematopoietic transition	2/577	14/18569	0.0685414	0.225544	0.172594	mecom/tet3	2
GO:0008217	GO:0008217	regulation of blood pressure	4/577	50/18569	0.0692624	0.227561	0.174137	apln/avpr1ab/ednraa/adma	4
GO:0032835	GO:0032835	glomerulus development	5/577	71/18569	0.0697081	0.228313	0.174712	prkceb/podxl/myo1ca/srgap2/iqgap2	5
GO:0050769	GO:0050769	positive regulation of neurogenesis	5/577	71/18569	0.0697081	0.228313	0.174712	lef1/sema7a/dbn1/plxnb3/hapln3	5
GO:0001763	GO:0001763	morphogenesis of a branching structure	3/577	31/18569	0.0705832	0.230462	0.176357	dll4/igfbp7/sema3ab	3
GO:0046890	GO:0046890	regulation of lipid biosynthetic process	3/577	31/18569	0.0705832	0.230462	0.176357	lef1/tle3a/apc	3
GO:0060041	GO:0060041	retina development in camera-type eye	14/577	291/18569	0.0712233	0.232192	0.177681	cadm1b/tbx2b/agrn/ccdc141/cerkl/zic2a/hbegfa/llgl1/myo6b/apc/cdipt/wwtr1/emc3/cdc42	14
GO:0060026	GO:0060026	convergent extension	9/577	165/18569	0.0726299	0.236047	0.180631	s1pr2/appa/mmp14b/mcamb/amotl2a/rap1b/akap12b/smad5/ptk2ab	9
GO:0060538	GO:0060538	skeletal muscle organ development	9/577	165/18569	0.0726299	0.236047	0.180631	spry4/hspg2/myo9ab/lama4/myo18ab/jam2a/tln1/plecb/qkia	9
GO:0051240	GO:0051240	positive regulation of multicellular organismal process	14/577	292/18569	0.0727943	0.236217	0.180761	tirap/afap1l2/pgfb/lef1/apln/sema7a/dbn1/il15/avpr1ab/gata2a/plxnb3/hapln3/kdr/adma	14
GO:0007189	GO:0007189	adenylate cyclase-activating G protein-coupled receptor signaling pathway	8/577	141/18569	0.0731943	0.23715	0.181474	adcyap1b/adra2da/adgrb1a/lpar2a/s1pr2/s1pr5a/adgrl4/adma	8
GO:0061351	GO:0061351	neural precursor cell proliferation	4/577	51/18569	0.0733994	0.237449	0.181703	zic2a/zic2b/tcf7l1b/hapln3	4
GO:0008038	GO:0008038	neuron recognition	3/577	32/18569	0.0761627	0.243622	0.186427	efnb2a/robo3/robo4	3
GO:0045766	GO:0045766	positive regulation of angiogenesis	3/577	32/18569	0.0761627	0.243622	0.186427	pgfb/gata2a/kdr	3
GO:0061318	GO:0061318	renal filtration cell differentiation	3/577	32/18569	0.0761627	0.243622	0.186427	prkceb/srgap2/iqgap2	3
GO:0072010	GO:0072010	glomerular epithelium development	3/577	32/18569	0.0761627	0.243622	0.186427	prkceb/srgap2/iqgap2	3
GO:0072112	GO:0072112	podocyte differentiation	3/577	32/18569	0.0761627	0.243622	0.186427	prkceb/srgap2/iqgap2	3
GO:0072311	GO:0072311	glomerular epithelial cell differentiation	3/577	32/18569	0.0761627	0.243622	0.186427	prkceb/srgap2/iqgap2	3
GO:0035148	GO:0035148	tube formation	5/577	73/18569	0.0765703	0.243622	0.186427	pcdh19/igfbp3/zic2a/phactr4b/smad5	5
GO:0051130	GO:0051130	positive regulation of cellular component organization	11/577	217/18569	0.0768384	0.243622	0.186427	nrp1b/sema7a/dbn1/cdc42ep5/plxnb3/wasf3b/nck1b/limk1b/limch1b/cdc42l/cdc42	11
GO:0090287	GO:0090287	regulation of cellular response to growth factor stimulus	9/577	167/18569	0.0770072	0.243622	0.186427	igfbp3/spry4/dll4/ldlrad4a/nrp1b/bambia/tsc22d3/skib/smad5	9
GO:0048704	GO:0048704	embryonic skeletal system morphogenesis	10/577	192/18569	0.0773106	0.243622	0.186427	cxcr4a/prdm1a/mecom/zic2a/hspg2/fscn1a/s1pr2/zic2b/tln1/rap1b	10
GO:0006984	GO:0006984	ER-nucleus signaling pathway	2/577	15/18569	0.0775055	0.243622	0.186427	insig1/nck1b	2
GO:0008078	GO:0008078	mesodermal cell migration	2/577	15/18569	0.0775055	0.243622	0.186427	apln/s1pr2	2
GO:0010634	GO:0010634	positive regulation of epithelial cell migration	2/577	15/18569	0.0775055	0.243622	0.186427	nrp1b/cdc42	2
GO:0030947	GO:0030947	regulation of vascular endothelial growth factor receptor signaling pathway	2/577	15/18569	0.0775055	0.243622	0.186427	dll4/nrp1b	2
GO:0031638	GO:0031638	zymogen activation	2/577	15/18569	0.0775055	0.243622	0.186427	plat/mmp14b	2
GO:0034315	GO:0034315	regulation of Arp2/3 complex-mediated actin nucleation	2/577	15/18569	0.0775055	0.243622	0.186427	arfip2a/wasf3b	2
GO:0042058	GO:0042058	regulation of epidermal growth factor receptor signaling pathway	2/577	15/18569	0.0775055	0.243622	0.186427	afap1l2/rhbdf1a	2
GO:0045773	GO:0045773	positive regulation of axon extension	2/577	15/18569	0.0775055	0.243622	0.186427	sema7a/dbn1	2
GO:1903531	GO:1903531	negative regulation of secretion by cell	2/577	15/18569	0.0775055	0.243622	0.186427	rhbdf1a/rap1b	2
GO:0001708	GO:0001708	cell fate specification	7/577	119/18569	0.0777576	0.24405	0.186755	hey1/cdkn1ca/tbx21/tbx3a/tbx2b/apc/tcf7l1b	7
GO:0061640	GO:0061640	cytoskeleton-dependent cytokinesis	5/577	74/18569	0.0801333	0.251132	0.192174	dchs1b/myh10/rock2b/iqgap2/rhocb	5
GO:0006865	GO:0006865	amino acid transport	7/577	120/18569	0.0804888	0.251871	0.19274	slc7a5/zgc:158423/slc7a3a/slc3a2a/slc38a5b/lrrc8c/lrrc8ab	7
GO:0001841	GO:0001841	neural tube formation	3/577	33/18569	0.0819298	0.254866	0.195032	pcdh19/zic2a/phactr4b	3
GO:0045197	GO:0045197	establishment or maintenance of epithelial cell apical/basal polarity	3/577	33/18569	0.0819298	0.254866	0.195032	jag2b/myo9ab/notch1b	3
GO:0045494	GO:0045494	photoreceptor cell maintenance	3/577	33/18569	0.0819298	0.254866	0.195032	her9/emc3/cdc42	3
GO:1904018	GO:1904018	positive regulation of vasculature development	3/577	33/18569	0.0819298	0.254866	0.195032	pgfb/gata2a/kdr	3
GO:0032940	GO:0032940	secretion by cell	12/577	246/18569	0.0832579	0.258615	0.197901	abcc4/llgl2/dchs1b/exoc6b/llgl1/sdf4/exoc3l1/rhbdf1a/rab11a/stxbp2/ptbp1a/rap1b	12
GO:0007162	GO:0007162	negative regulation of cell adhesion	5/577	75/18569	0.0837834	0.259368	0.198476	mecom/podxl/tet3/plxnb3/cdh5	5
GO:0098656	GO:0098656	monoatomic anion transmembrane transport	5/577	75/18569	0.0837834	0.259368	0.198476	lrrc8c/lrrc8ab/slc12a2/ano5b/vdac3	5
GO:0030162	GO:0030162	regulation of proteolysis	9/577	170/18569	0.0838696	0.259368	0.198476	kng1/agrn/trib1/axin2/serpinh1a/gsk3ba/rhbdf1a/trib3/hip1	9

## Sheet: tab.go_DEG_Multi36_cluster2
36 hpf cl 2	ID	Description	GeneRatio	BgRatio	pvalue	p.adjust	qvalue	geneID	Count
GO:0006260	GO:0006260	DNA replication	74/488	141/18569	1.34105e-79	1.63474e-76	1.32694e-76	esco2/e2f8/mms22l/dscc1/recql4/tonsl/primpol/e2f7/cdc45/zranb3/pole2/pola2/blm/dna2/mcm8/terf1/pold1/rrm1/pole/dtl/pola1/prim1/pcna/prim2/mcm10/topbp1/orc5/chaf1a/dbf4b/gins3/pold2/rpa2/gmnn/gins1/pold3/lig1/rpa3/cenps/wdhd1/fen1/gins4/rfc1/rad51/timeless/orc4/rfc3/rfc2/traip/rfc5/rfc4/smarcal1/gins2/cdc6/orc1/rnaseh2a/polg/orc2/rbbp4/eme1/dbf4/mcm7/rpa1/pole3/pole4/tipin/cenpx/parp1/ssrp1a/mcm6/…	74
GO:0051276	GO:0051276	chromosome organization	88/488	243/18569	5.45311e-77	3.32367e-74	2.69785e-74	esco2/dscc1/si:ch73-368j24.11/ncapg2/cenpo/si:dkey-261m9.12/ncapd3/rad51d/cenph/blm/si:ch211-113a14.18/mcm8/terf1/nsl1/si:dkey-108k21.10/si:ch211-113a14.24/zgc:153405/psmc3ip/trip13/si:dkey-108k21.21/mis18a/mcm9/fbxo5/kif18a/cenpn/mis12/ncaph2/si:dkey-23a13.17/kntc1/smc2/msh2/dclre1b/zwilch/fancd2/ska1/si:dkey-23a13.9/si:ch211-161h7.4/ncapg/smc4/cenpp/rad51/si:ch73-368j24.12/chtf8/cenpk/rmi2/ncap…	88
GO:0006974	GO:0006974	DNA damage response	107/488	438/18569	9.61346e-74	3.90627e-71	3.17076e-71	exo1/mms22l/fancl/chek1/pclaf/tonsl/brip1/ube2t/primpol/e2f7/zswim7/cdc45/rad54b/rad54l/chek2/zranb3/fanci/fancc/pole2/rad51d/blm/dna2/mcm8/nsmce1/rad51c/unga/cdc7/swi5/trip13/neil3/fanca/pold1/mcm9/pole/dtl/palb2/brca2/rad18/pcna/mcm10/topbp1/msh2/dclre1b/zgc:112496/faap24/chaf1a/fancd2/pold2/mus81/rpa2/rad1/pold3/lig1/rpa3/cenps/wdhd1/fen1/gins4/rfc1/rad51/wdr76/timeless/rmi2/dek/rfc3/rfc2/rad5…	107
GO:0006281	GO:0006281	DNA repair	93/488	335/18569	2.6068e-69	7.94423e-67	6.44841e-67	exo1/mms22l/fancl/pclaf/tonsl/brip1/ube2t/primpol/zswim7/cdc45/rad54b/rad54l/zranb3/fanci/fancc/pole2/rad51d/blm/dna2/mcm8/nsmce1/rad51c/unga/cdc7/swi5/trip13/neil3/fanca/pold1/mcm9/pole/dtl/palb2/brca2/rad18/pcna/msh2/dclre1b/zgc:112496/faap24/chaf1a/fancd2/pold2/mus81/rpa2/rad1/pold3/lig1/rpa3/cenps/wdhd1/fen1/gins4/rfc1/rad51/timeless/rmi2/dek/rfc3/rfc2/rad52/rfc5/cdca5/msh6/rfc4/smarcal1/gins…	93
GO:0006261	GO:0006261	DNA-templated DNA replication	54/488	87/18569	1.14469e-63	2.79076e-61	2.26529e-61	e2f8/mms22l/tonsl/primpol/e2f7/cdc45/zranb3/pole2/pola2/blm/dna2/pold1/pole/pola1/prim1/pcna/prim2/mcm10/topbp1/orc5/dbf4b/gins3/pold2/gins1/pold3/lig1/cenps/wdhd1/gins4/rad51/timeless/orc4/rfc3/rfc2/traip/rfc5/rfc4/smarcal1/gins2/cdc6/orc1/polg/eme1/dbf4/mcm7/pole3/pole4/tipin/cenpx/parp1/mcm6/mcm3/carm1/atrx	54
GO:1903047	GO:1903047	mitotic cell cycle process	81/488	305/18569	1.73929e-58	3.53365e-56	2.8683e-56	chek1/ncapg2/e2f7/cdc45/stil/ncapd3/chek2/ccne2/kif4/sass6/cenph/foxm1/nsl1/skp2/fbxo5/kif18a/mis12/dtl/ncaph2/pola1/kntc1/smc2/topbp1/zwilch/fancd2/gins3/mus81/ska1/si:ch211-161h7.4/gins1/lig1/ncapg/smc4/rad51/ccna2/cenpk/ncaph/cdca5/cdc23/cdc6/orc1/cenpi/ndc80/eme1/cdk2/zgc:86764/nuf2/ncapd2/ccnb2/aurkb/zw10/tipin/mad2l1bp/knstrn/nbn/anapc1/mad2l1/racgap1/banf1/tubg1/ranbp1/bub3/spdl1/rb1/mcm6/…	81
GO:0007059	GO:0007059	chromosome segregation	65/488	179/18569	9.58732e-57	1.66956e-54	1.3552e-54	ncapg2/stil/ncapd3/kif4/cenph/haus4/nsl1/psmc3ip/haus1/trip13/mis18a/kif18a/espl1/cenpn/haus6/mis12/ncaph2/si:dkey-6i22.5/haus3/kntc1/haus5/smc2/zwilch/fancd2/ska1/si:ch211-161h7.4/ncapg/smc4/cenpk/rmi2/ncaph/cdca5/cdc23/cenpi/ndc80/zgc:86764/nuf2/ncapd2/spc24/cenpt/aurkb/si:dkey-25o16.4/zw10/knl1/knstrn/sgo1/anapc1/mad2l1/racgap1/tubgcp2/top2a/spc25/tubg1/bub3/spdl1/cenpw/stag2b/kifc1/mki67/ttk/…	65
GO:0071824	GO:0071824	protein-DNA complex organization	86/488	373/18569	1.3873e-56	2.11389e-54	1.71587e-54	mms22l/si:ch73-368j24.11/tonsl/primpol/asf1ba/cenpo/phf19/cdc45/si:dkey-261m9.12/cenph/hist1h2a6/si:ch211-113a14.18/rad51c/unga/si:dkey-108k21.10/si:ch211-113a14.24/zgc:153405/si:ch1073-153i20.5/hist1h2a3/si:dkey-108k21.21/mis18a/chaf1b/cenpn/mis12/si:dkey-23a13.17/kntc1/dnmt3bb.2/ing5b/suv39h1b/chaf1a/si:dkey-23a13.9/si:ch211-161h7.4/hist1h2a4/si:dkey-108k21.19/cenpp/rad51/si:ch73-368j24.12/cenp…	86
GO:0000280	GO:0000280	nuclear division	61/488	165/18569	8.24814e-54	1.11717e-51	9.06813e-52	ncapg2/brip1/rad54b/rad54l/ncapd3/sass6/rad51d/rad51c/nsl1/psmc3ip/trip13/fbxo5/kif18a/espl1/mis12/ncaph2/kntc1/smc2/zwilch/fancd2/mus81/ska1/si:ch211-161h7.4/mnd1/cenps/ncapg/smc4/rad51/cenpk/ncaph/cdca5/cdc23/cenpi/ndc80/eme1/zgc:86764/nuf2/ncapd2/zgc:85936/zw10/mad2l1bp/knstrn/sgo1/cenpx/mad2l1/racgap1/banf1/top2a/tubg1/ranbp1/bub3/spdl1/kifc1/aurka/mki67/ttk/kif23/si:ch211-244o22.2/tmpoa/ran/…	61
GO:0006310	GO:0006310	DNA recombination	59/488	168/18569	1.65048e-50	2.01194e-48	1.63311e-48	exo1/mms22l/si:ch73-368j24.11/tonsl/brip1/zswim7/cdc45/si:dkey-261m9.12/rad54b/rad54l/rad51d/blm/si:ch211-113a14.18/mcm8/nsmce1/rad51c/si:dkey-108k21.10/si:ch211-113a14.24/zgc:153405/psmc3ip/cdc7/swi5/trip13/si:dkey-108k21.21/mcm9/palb2/brca2/si:dkey-23a13.17/msh2/fancd2/mus81/rpa2/si:dkey-23a13.9/lig1/mnd1/rpa3/cenps/gins4/rad51/si:ch73-368j24.12/rmi2/rad52/zgc:110425/gins2/eme1/rad51ap1/nucks1b…	59
GO:0048285	GO:0048285	organelle fission	61/488	188/18569	8.24062e-50	9.13211e-48	7.41262e-48	ncapg2/brip1/rad54b/rad54l/ncapd3/sass6/rad51d/rad51c/nsl1/psmc3ip/trip13/fbxo5/kif18a/espl1/mis12/ncaph2/kntc1/smc2/zwilch/fancd2/mus81/ska1/si:ch211-161h7.4/mnd1/cenps/ncapg/smc4/rad51/cenpk/ncaph/cdca5/cdc23/cenpi/ndc80/eme1/zgc:86764/nuf2/ncapd2/zgc:85936/zw10/mad2l1bp/knstrn/sgo1/cenpx/mad2l1/racgap1/banf1/top2a/tubg1/ranbp1/bub3/spdl1/kifc1/aurka/mki67/ttk/kif23/si:ch211-244o22.2/tmpoa/ran/…	61
GO:0006325	GO:0006325	chromatin organization	72/488	337/18569	8.45433e-45	8.58819e-43	6.97111e-43	mms22l/si:ch73-368j24.11/tonsl/primpol/asf1ba/phf19/si:dkey-261m9.12/hist1h2a6/si:ch211-113a14.18/unga/si:dkey-108k21.10/si:ch211-113a14.24/zgc:153405/si:ch1073-153i20.5/hist1h2a3/si:dkey-108k21.21/mis18a/chaf1b/cenpn/si:dkey-23a13.17/dnmt3bb.2/ing5b/suv39h1b/chaf1a/si:dkey-23a13.9/hist1h2a4/si:dkey-108k21.19/cenpp/si:ch73-368j24.12/asf1bb/dek/dnmt1/mtf2/zgc:110425/nsd2/cenpi/rbbp4/nasp/hist1h2a5…	72
GO:0098813	GO:0098813	nuclear chromosome segregation	45/488	110/18569	3.42826e-42	3.21465e-40	2.60936e-40	ncapg2/ncapd3/kif4/nsl1/psmc3ip/trip13/kif18a/espl1/mis12/ncaph2/kntc1/smc2/zwilch/fancd2/ska1/si:ch211-161h7.4/ncapg/smc4/cenpk/rmi2/ncaph/cdca5/cdc23/cenpi/ndc80/zgc:86764/nuf2/ncapd2/si:dkey-25o16.4/zw10/knl1/knstrn/sgo1/anapc1/mad2l1/racgap1/top2a/tubg1/bub3/spdl1/kifc1/ttk/kif23/ran/nusap1	45
GO:0140014	GO:0140014	mitotic nuclear division	42/488	111/18569	1.01624e-37	8.84859e-36	7.18248e-36	ncapg2/ncapd3/nsl1/fbxo5/kif18a/mis12/ncaph2/kntc1/smc2/zwilch/ska1/si:ch211-161h7.4/ncapg/smc4/cenpk/ncaph/cdca5/cdc23/cenpi/ndc80/zgc:86764/nuf2/ncapd2/zw10/mad2l1bp/knstrn/mad2l1/racgap1/banf1/tubg1/ranbp1/bub3/spdl1/kifc1/aurka/mki67/ttk/kif23/si:ch211-244o22.2/tmpoa/ran/nusap1	42
GO:0065004	GO:0065004	protein-DNA complex assembly	38/488	85/18569	1.41114e-37	1.14679e-35	9.30857e-36	si:ch73-368j24.11/cenpo/cdc45/si:dkey-261m9.12/cenph/si:ch211-113a14.18/rad51c/si:dkey-108k21.10/si:ch211-113a14.24/zgc:153405/si:dkey-108k21.21/mis18a/chaf1b/cenpn/mis12/si:dkey-23a13.17/kntc1/chaf1a/si:dkey-23a13.9/si:ch211-161h7.4/cenpp/rad51/si:ch73-368j24.12/cenpk/rad52/zgc:110425/cenpi/nasp/cenpt/zgc:163040/cenpx/daxx/nap1l1/sart3/cenpw/seta/setb/dlgap5	38
GO:0000819	GO:0000819	sister chromatid segregation	37/488	80/18569	2.63361e-37	2.00648e-35	1.62868e-35	ncapg2/ncapd3/nsl1/kif18a/mis12/ncaph2/kntc1/smc2/zwilch/ska1/si:ch211-161h7.4/ncapg/smc4/cenpk/rmi2/ncaph/cdca5/cdc23/cenpi/ndc80/zgc:86764/nuf2/ncapd2/zw10/knstrn/anapc1/mad2l1/racgap1/top2a/tubg1/bub3/spdl1/kifc1/ttk/kif23/ran/nusap1	37
GO:0006338	GO:0006338	chromatin remodeling	52/488	217/18569	4.39867e-35	3.15411e-33	2.56022e-33	si:ch73-368j24.11/primpol/si:dkey-261m9.12/hist1h2a6/si:ch211-113a14.18/unga/si:dkey-108k21.10/si:ch211-113a14.24/zgc:153405/si:ch1073-153i20.5/hist1h2a3/si:dkey-108k21.21/mis18a/chaf1b/cenpn/si:dkey-23a13.17/dnmt3bb.2/chaf1a/si:dkey-23a13.9/hist1h2a4/si:dkey-108k21.19/cenpp/si:ch73-368j24.12/dnmt1/zgc:110425/cenpi/rbbp4/nasp/hist1h2a5/pole3/hist1h2a1/h2ax/zgc:163040/hat1/baz1b/daxx/ezh2/uhrf1/br…	52
GO:0000070	GO:0000070	mitotic sister chromatid segregation	34/488	71/18569	5.04734e-35	3.41817e-33	2.77456e-33	ncapg2/ncapd3/nsl1/kif18a/mis12/ncaph2/kntc1/smc2/zwilch/ska1/si:ch211-161h7.4/ncapg/smc4/cenpk/ncaph/cdca5/cdc23/cenpi/ndc80/zgc:86764/nuf2/ncapd2/zw10/knstrn/mad2l1/racgap1/tubg1/bub3/spdl1/kifc1/ttk/kif23/ran/nusap1	34
GO:0006302	GO:0006302	double-strand break repair	44/488	148/18569	3.27124e-34	2.09876e-32	1.70358e-32	mms22l/tonsl/brip1/zswim7/cdc45/rad54b/rad54l/rad51d/blm/mcm8/nsmce1/rad51c/cdc7/swi5/trip13/mcm9/palb2/brca2/dclre1b/fancd2/mus81/rpa2/rpa3/gins4/rad51/rmi2/dek/rad52/cdca5/gins2/xrcc1/eme1/rad51ap1/nucks1b/zgc:85936/mcm7/rpa1/nbn/parp2/parp1/nsmce2/mcm6/mcm3/rnf168	44
GO:0010564	GO:0010564	regulation of cell cycle process	50/488	218/18569	8.984e-33	5.47575e-31	4.44472e-31	e2f8/chek1/e2f7/stil/chek2/ccne2/cep76/trip13/fbxo5/dtl/kntc1/topbp1/zwilch/fancd2/dbf4b/mus81/rad1/wdr76/timeless/rmi2/cdca5/cdc23/cdc6/orc1/ndc80/eme1/cdk2/dbf4/aurkb/si:dkey-25o16.4/zw10/tipin/mad2l1bp/tp53bp1/knstrn/nbn/anapc1/mad2l1/ranbp1/bub3/spdl1/rb1/rae1/aurka/mki67/ttk/cdk1/cdc25b/si:ch211-244o22.2/tpx2	50
GO:0051301	GO:0051301	cell division	56/488	307/18569	4.69617e-31	2.72601e-29	2.21273e-29	e2f8/ncapg2/e2f7/cdc45/ncapd3/sass6/haus1/cdc7/ercc6l/mis18a/fbxo5/haus6/mis12/si:dkey-6i22.5/haus3/zwilch/ska1/ncapg/ccna2/ncaph/cdca5/cdc23/cdc6/cks1b/ndc80/nuf2/ncapd2/spc24/vrk1/ccnb2/aurkb/si:dkey-25o16.4/zw10/tipin/knl1/sgo1/kl/racgap1/spc25/spdl1/pds5b/stag2b/rae1/smc3/aurka/ttk/cdk1/cdca7b/cks2/cdc25b/cdk11b/kif23/si:ch211-244o22.2/arpp19b/plk1/nusap1	56
GO:0000724	GO:0000724	double-strand break repair via homologous recombination	33/488	89/18569	1.65842e-29	9.18916e-28	7.45893e-28	mms22l/tonsl/zswim7/cdc45/rad54b/rad54l/rad51d/blm/mcm8/nsmce1/rad51c/cdc7/swi5/mcm9/palb2/brca2/mus81/rpa2/rpa3/gins4/rad51/rmi2/rad52/gins2/rad51ap1/nucks1b/zgc:85936/mcm7/rpa1/nbn/nsmce2/mcm6/mcm3	33
GO:0051321	GO:0051321	meiotic cell cycle	34/488	97/18569	2.11681e-29	1.12191e-27	9.10664e-28	brip1/rad54b/rad54l/ncapd3/rad51d/blm/rad51c/psmc3ip/trip13/fbxo5/espl1/ncaph2/fancd2/mus81/si:ch211-161h7.4/mnd1/cenps/rad51/eme1/nuf2/ncapd2/zgc:85936/rpa1/h2ax/sgo1/cenpx/nbn/tubgcp2/top2a/tubg1/smc3/aurka/ttk/cdc25b	34
GO:0000725	GO:0000725	recombinational repair	33/488	90/18569	2.55607e-29	1.29827e-27	1.05382e-27	mms22l/tonsl/zswim7/cdc45/rad54b/rad54l/rad51d/blm/mcm8/nsmce1/rad51c/cdc7/swi5/mcm9/palb2/brca2/mus81/rpa2/rpa3/gins4/rad51/rmi2/rad52/gins2/rad51ap1/nucks1b/zgc:85936/mcm7/rpa1/nbn/nsmce2/mcm6/mcm3	33
GO:0030261	GO:0030261	chromosome condensation	22/488	31/18569	1.72996e-28	8.43526e-27	6.84698e-27	si:ch73-368j24.11/ncapg2/si:dkey-261m9.12/ncapd3/si:ch211-113a14.18/si:dkey-108k21.10/si:ch211-113a14.24/zgc:153405/si:dkey-108k21.21/ncaph2/si:dkey-23a13.17/smc2/si:dkey-23a13.9/ncapg/smc4/si:ch73-368j24.12/ncaph/zgc:110425/ncapd2/si:dkey-108k21.14/top2a/nusap1	22
GO:0051726	GO:0051726	regulation of cell cycle	64/488	466/18569	5.08838e-28	2.38567e-26	1.93647e-26	e2f8/chek1/pclaf/e2f7/stil/chek2/ccne2/cep76/skp2/trip13/fbxo5/dtl/kntc1/topbp1/zwilch/fancd2/dbf4b/mus81/rad1/gmnn/btg3/wdr76/ccna2/timeless/rmi2/cdca5/cdc23/cdc6/orc1/cks1b/ndc80/eme1/cdk2/dbf4/ccnb2/aurkb/si:dkey-25o16.4/men1/zw10/tipin/mad2l1bp/tp53bp1/knstrn/nbn/tfdp1b/anapc1/mad2l1/ranbp1/bub3/ssrp1a/spdl1/rb1/cenpw/rae1/aurka/mki67/ttk/cdk1/cks2/cdc25b/dlgap5/cdk11b/si:ch211-244o22.2/tpx2	64
GO:0044770	GO:0044770	cell cycle phase transition	40/488	167/18569	3.60228e-27	1.62636e-25	1.32014e-25	chek1/e2f7/chek2/ccne2/foxm1/skp2/trip13/dtl/kntc1/topbp1/zwilch/fancd2/dbf4b/mus81/rad1/wdr76/ccna2/timeless/cdca5/cdc23/cdc6/orc1/ndc80/eme1/cdk2/dbf4/ccnb2/zw10/tipin/mad2l1bp/tp53bp1/nbn/anapc1/mad2l1/bub3/spdl1/rb1/ttk/cdk1/cdc25b	40
GO:1901987	GO:1901987	regulation of cell cycle phase transition	35/488	132/18569	1.56669e-25	6.82071e-24	5.53644e-24	chek1/e2f7/chek2/ccne2/trip13/dtl/kntc1/topbp1/zwilch/fancd2/dbf4b/mus81/rad1/wdr76/timeless/cdca5/cdc23/cdc6/orc1/ndc80/eme1/cdk2/dbf4/zw10/tipin/mad2l1bp/tp53bp1/nbn/mad2l1/bub3/spdl1/rb1/ttk/cdk1/cdc25b	35
GO:1903046	GO:1903046	meiotic cell cycle process	28/488	74/18569	1.68205e-25	7.07042e-24	5.73912e-24	brip1/rad54b/rad54l/ncapd3/rad51d/rad51c/psmc3ip/trip13/fbxo5/espl1/ncaph2/fancd2/mus81/si:ch211-161h7.4/mnd1/cenps/rad51/eme1/nuf2/ncapd2/zgc:85936/sgo1/cenpx/top2a/tubg1/aurka/ttk/cdc25b	28
GO:0045005	GO:0045005	DNA-templated DNA replication maintenance of fidelity	18/488	24/18569	3.05388e-24	1.24089e-22	1.00724e-22	mms22l/tonsl/primpol/zranb3/dna2/pold1/pole/cenps/rad51/timeless/traip/smarcal1/eme1/tipin/cenpx/parp1/carm1/atrx	18
GO:0051052	GO:0051052	regulation of DNA metabolic process	30/488	104/18569	3.12691e-23	1.22958e-21	9.98064e-22	esco2/e2f8/dscc1/si:ch73-368j24.11/e2f7/si:dkey-261m9.12/blm/si:ch211-113a14.18/terf1/si:dkey-108k21.10/si:ch211-113a14.24/zgc:153405/si:dkey-108k21.21/pcna/si:dkey-23a13.17/dbf4b/si:dkey-23a13.9/gmnn/si:ch73-368j24.12/timeless/rmi2/dek/zgc:110425/dbf4/si:dkey-108k21.14/usp1/tipin/tfam/rnf168/hells	30
GO:0000075	GO:0000075	cell cycle checkpoint signaling	26/488	75/18569	1.29269e-22	4.92432e-21	3.99712e-21	chek1/e2f7/chek2/trip13/dtl/kntc1/topbp1/zwilch/fancd2/mus81/rad1/wdr76/timeless/cdc6/orc1/ndc80/eme1/zw10/tipin/tp53bp1/nbn/mad2l1/bub3/spdl1/ttk/cdk1	26
GO:0045786	GO:0045786	negative regulation of cell cycle	32/488	131/18569	3.06795e-22	1.13328e-20	9.19897e-21	e2f8/chek1/e2f7/chek2/trip13/fbxo5/dtl/kntc1/topbp1/zwilch/fancd2/mus81/rad1/gmnn/btg3/wdr76/timeless/cdc6/orc1/ndc80/eme1/men1/zw10/tipin/tp53bp1/nbn/mad2l1/bub3/spdl1/rb1/ttk/cdk1	32
GO:0010948	GO:0010948	negative regulation of cell cycle process	29/488	103/18569	3.63711e-22	1.30401e-20	1.05848e-20	e2f8/chek1/e2f7/chek2/trip13/fbxo5/dtl/kntc1/topbp1/zwilch/fancd2/mus81/rad1/wdr76/timeless/cdc6/orc1/ndc80/eme1/zw10/tipin/tp53bp1/nbn/mad2l1/bub3/spdl1/rb1/ttk/cdk1	29
GO:1901988	GO:1901988	negative regulation of cell cycle phase transition	27/488	89/18569	1.11966e-21	3.89961e-20	3.16535e-20	chek1/e2f7/chek2/trip13/dtl/kntc1/topbp1/zwilch/fancd2/mus81/rad1/wdr76/timeless/cdc6/orc1/ndc80/eme1/zw10/tipin/tp53bp1/nbn/mad2l1/bub3/spdl1/rb1/ttk/cdk1	27
GO:0034508	GO:0034508	centromere complex assembly	15/488	18/18569	1.20981e-21	4.09655e-20	3.32521e-20	cenpo/cenph/mis18a/cenpn/mis12/kntc1/si:ch211-161h7.4/cenpp/cenpk/cenpi/nasp/cenpt/cenpx/cenpw/dlgap5	15
GO:0140013	GO:0140013	meiotic nuclear division	22/488	58/18569	2.50114e-20	8.24024e-19	6.68868e-19	brip1/rad54b/rad54l/rad51d/rad51c/psmc3ip/trip13/fbxo5/espl1/fancd2/mus81/si:ch211-161h7.4/mnd1/cenps/rad51/eme1/nuf2/zgc:85936/sgo1/cenpx/top2a/ttk	22
GO:0031297	GO:0031297	replication fork processing	15/488	21/18569	7.48217e-20	2.4002e-18	1.94827e-18	mms22l/tonsl/primpol/zranb3/dna2/cenps/rad51/traip/smarcal1/eme1/tipin/cenpx/parp1/carm1/atrx	15
GO:0006334	GO:0006334	nucleosome assembly	19/488	41/18569	9.5315e-20	2.9792e-18	2.41825e-18	si:ch73-368j24.11/si:dkey-261m9.12/si:ch211-113a14.18/si:dkey-108k21.10/si:ch211-113a14.24/zgc:153405/si:dkey-108k21.21/chaf1b/si:dkey-23a13.17/chaf1a/si:dkey-23a13.9/si:ch73-368j24.12/zgc:110425/zgc:163040/daxx/nap1l1/sart3/seta/setb	19
GO:0007093	GO:0007093	mitotic cell cycle checkpoint signaling	21/488	54/18569	9.89129e-20	3.01437e-18	2.44679e-18	chek1/e2f7/chek2/dtl/kntc1/topbp1/zwilch/fancd2/mus81/cdc6/orc1/ndc80/eme1/zw10/tipin/nbn/mad2l1/bub3/spdl1/ttk/cdk1	21
GO:0044772	GO:0044772	mitotic cell cycle phase transition	28/488	125/18569	1.5873e-18	4.7193e-17	3.8307e-17	chek1/e2f7/ccne2/foxm1/skp2/dtl/kntc1/topbp1/zwilch/ccna2/cdca5/cdc23/cdc6/orc1/ndc80/cdk2/ccnb2/zw10/mad2l1bp/nbn/anapc1/mad2l1/bub3/spdl1/rb1/ttk/cdk1/cdc25b	28
GO:0006913	GO:0006913	nucleocytoplasmic transport	27/488	115/18569	1.7895e-18	5.07303e-17	4.11782e-17	aaas/nutf2l/xpo7/cse1l/nup160/ipo9/nup93/nup58/nup85/nup188/nup62l/rangap1a/ranbp1/ranbp3b/phax/nup107/rae1/kpnb1/abce1/kpnb3/nup50/xpo1a/ran/ipo7/ddx39aa/anp32a/ddx39ab	27
GO:0051169	GO:0051169	nuclear transport	27/488	115/18569	1.7895e-18	5.07303e-17	4.11782e-17	aaas/nutf2l/xpo7/cse1l/nup160/ipo9/nup93/nup58/nup85/nup188/nup62l/rangap1a/ranbp1/ranbp3b/phax/nup107/rae1/kpnb1/abce1/kpnb3/nup50/xpo1a/ran/ipo7/ddx39aa/anp32a/ddx39ab	27
GO:0034728	GO:0034728	nucleosome organization	19/488	47/18569	2.34797e-18	6.50495e-17	5.28013e-17	si:ch73-368j24.11/si:dkey-261m9.12/si:ch211-113a14.18/si:dkey-108k21.10/si:ch211-113a14.24/zgc:153405/si:dkey-108k21.21/chaf1b/si:dkey-23a13.17/chaf1a/si:dkey-23a13.9/si:ch73-368j24.12/zgc:110425/zgc:163040/daxx/nap1l1/sart3/seta/setb	19
GO:0045930	GO:0045930	negative regulation of mitotic cell cycle	24/488	88/18569	3.34294e-18	9.05564e-17	7.35055e-17	chek1/e2f7/chek2/fbxo5/dtl/kntc1/topbp1/zwilch/fancd2/mus81/btg3/cdc6/orc1/ndc80/eme1/zw10/tipin/nbn/mad2l1/bub3/spdl1/rb1/ttk/cdk1	24
GO:0007051	GO:0007051	spindle organization	24/488	90/18569	5.94528e-18	1.5755e-16	1.27885e-16	stil/kif4/sass6/cenph/haus4/haus1/haus6/haus3/haus5/ndc80/zgc:86764/nuf2/aurkb/knstrn/racgap1/tubgcp2/tubg1/rae1/kifc1/aurka/dlgap5/kif23/tpx2/plk1	24
GO:0007131	GO:0007131	reciprocal meiotic recombination	16/488	31/18569	8.49235e-18	2.1567e-16	1.75062e-16	brip1/rad54b/rad54l/rad51d/rad51c/psmc3ip/trip13/fancd2/mus81/mnd1/cenps/rad51/eme1/zgc:85936/cenpx/top2a	16
GO:0140527	GO:0140527	reciprocal homologous recombination	16/488	31/18569	8.49235e-18	2.1567e-16	1.75062e-16	brip1/rad54b/rad54l/rad51d/rad51c/psmc3ip/trip13/fancd2/mus81/mnd1/cenps/rad51/eme1/zgc:85936/cenpx/top2a	16
GO:0019953	GO:0019953	sexual reproduction	39/488	278/18569	1.01422e-17	2.52314e-16	2.04806e-16	fancl/brip1/rad54b/rad54l/ncapd3/sass6/rad51d/blm/rad51c/psmc3ip/trip13/fbxo5/espl1/brca2/ncaph2/fancd2/mus81/nemp1/si:ch211-161h7.4/mnd1/cenps/rad51/eme1/nuf2/ncapd2/zgc:85936/vrk1/rpa1/h2ax/sgo1/cenpx/nbn/tubgcp2/top2a/tubg1/smc3/aurka/ttk/cdc25b	39
GO:0051053	GO:0051053	negative regulation of DNA metabolic process	18/488	44/18569	1.43714e-17	3.50374e-16	2.84402e-16	si:ch73-368j24.11/si:dkey-261m9.12/blm/si:ch211-113a14.18/terf1/si:dkey-108k21.10/si:ch211-113a14.24/zgc:153405/si:dkey-108k21.21/si:dkey-23a13.17/si:dkey-23a13.9/gmnn/si:ch73-368j24.12/timeless/rmi2/zgc:110425/si:dkey-108k21.14/tipin	18
GO:0035825	GO:0035825	homologous recombination	16/488	32/18569	1.65782e-17	3.96252e-16	3.21642e-16	brip1/rad54b/rad54l/rad51d/rad51c/psmc3ip/trip13/fancd2/mus81/mnd1/cenps/rad51/eme1/zgc:85936/cenpx/top2a	16
GO:1901990	GO:1901990	regulation of mitotic cell cycle phase transition	23/488	90/18569	8.28645e-17	1.94253e-15	1.57677e-15	chek1/e2f7/ccne2/dtl/kntc1/topbp1/zwilch/cdca5/cdc23/cdc6/orc1/ndc80/cdk2/zw10/mad2l1bp/nbn/mad2l1/bub3/spdl1/rb1/ttk/cdk1/cdc25b	23
GO:0006270	GO:0006270	DNA replication initiation	14/488	24/18569	9.6158e-17	2.21164e-15	1.7952e-15	cdc45/pola2/pola1/prim2/mcm10/topbp1/orc5/gins3/orc4/cdc6/orc1/mcm7/mcm6/mcm3	14
GO:0022616	GO:0022616	DNA strand elongation	12/488	16/18569	1.57169e-16	3.54794e-15	2.8799e-15	dna2/pole/pola1/pcna/dclre1b/pold2/gins1/pold3/lig1/mcm7/pole3/mcm3	12
GO:0007346	GO:0007346	regulation of mitotic cell cycle	37/488	274/18569	2.55679e-16	5.66677e-15	4.59977e-15	chek1/e2f7/chek2/ccne2/fbxo5/dtl/kntc1/topbp1/zwilch/fancd2/mus81/btg3/cdca5/cdc23/cdc6/orc1/cks1b/ndc80/eme1/cdk2/zw10/tipin/mad2l1bp/nbn/mad2l1/bub3/spdl1/rb1/cenpw/mki67/ttk/cdk1/cks2/cdc25b/dlgap5/cdk11b/si:ch211-244o22.2	37
GO:0061982	GO:0061982	meiosis I cell cycle process	18/488	51/18569	3.28596e-16	7.15282e-15	5.80601e-15	brip1/rad54b/rad54l/rad51d/rad51c/psmc3ip/trip13/fancd2/mus81/si:ch211-161h7.4/mnd1/cenps/rad51/eme1/zgc:85936/cenpx/top2a/cdc25b	18
GO:0022414	GO:0022414	reproductive process	40/488	332/18569	8.25652e-16	1.76574e-14	1.43327e-14	fancl/brip1/rad54b/rad54l/ncapd3/sass6/rad51d/blm/rad51c/psmc3ip/trip13/fbxo5/espl1/brca2/ncaph2/fancd2/mus81/nemp1/si:ch211-161h7.4/mnd1/cenps/rad51/eme1/nuf2/ncapd2/zgc:85936/vrk1/rpa1/h2ax/sgo1/cenpx/nbn/tubgcp2/top2a/tfam/tubg1/smc3/aurka/ttk/cdc25b	40
GO:0007127	GO:0007127	meiosis I	17/488	46/18569	8.95169e-16	1.8814e-14	1.52715e-14	brip1/rad54b/rad54l/rad51d/rad51c/psmc3ip/trip13/fancd2/mus81/si:ch211-161h7.4/mnd1/cenps/rad51/eme1/zgc:85936/cenpx/top2a	17
GO:0000003	GO:0000003	reproduction	40/488	335/18569	1.12607e-15	2.32658e-14	1.88851e-14	fancl/brip1/rad54b/rad54l/ncapd3/sass6/rad51d/blm/rad51c/psmc3ip/trip13/fbxo5/espl1/brca2/ncaph2/fancd2/mus81/nemp1/si:ch211-161h7.4/mnd1/cenps/rad51/eme1/nuf2/ncapd2/zgc:85936/vrk1/rpa1/h2ax/sgo1/cenpx/nbn/tubgcp2/top2a/tfam/tubg1/smc3/aurka/ttk/cdc25b	40
GO:0006271	GO:0006271	DNA strand elongation involved in DNA replication	11/488	14/18569	1.25305e-15	2.54578e-14	2.06644e-14	dna2/pole/pola1/pcna/pold2/gins1/pold3/lig1/mcm7/pole3/mcm3	11
GO:0031570	GO:0031570	DNA integrity checkpoint signaling	17/488	47/18569	1.36883e-15	2.73542e-14	2.22037e-14	chek1/e2f7/chek2/dtl/topbp1/fancd2/mus81/rad1/wdr76/timeless/cdc6/orc1/eme1/tipin/tp53bp1/nbn/cdk1	17
GO:0051383	GO:0051383	kinetochore organization	10/488	11/18569	1.54226e-15	3.03229e-14	2.46134e-14	cenph/mis12/kntc1/si:ch211-161h7.4/cenpk/nuf2/cenpt/cenpx/cenpw/dlgap5	10
GO:0044786	GO:0044786	cell cycle DNA replication	12/488	19/18569	4.04965e-15	7.83575e-14	6.36035e-14	e2f8/e2f7/cdc45/pola1/dbf4b/gins3/gins1/lig1/rad51/dbf4/mcm6/mcm3	12
GO:0045910	GO:0045910	negative regulation of DNA recombination	14/488	30/18569	6.16951e-15	1.1751e-13	9.53839e-14	si:ch73-368j24.11/si:dkey-261m9.12/blm/si:ch211-113a14.18/si:dkey-108k21.10/si:ch211-113a14.24/zgc:153405/si:dkey-108k21.21/si:dkey-23a13.17/si:dkey-23a13.9/si:ch73-368j24.12/rmi2/zgc:110425/si:dkey-108k21.14	14
GO:1901991	GO:1901991	negative regulation of mitotic cell cycle phase transition	17/488	52/18569	9.70745e-15	1.82052e-13	1.47773e-13	chek1/e2f7/dtl/kntc1/topbp1/zwilch/cdc6/orc1/ndc80/zw10/nbn/mad2l1/bub3/spdl1/rb1/ttk/cdk1	17
GO:0051382	GO:0051382	kinetochore assembly	9/488	10/18569	5.43365e-14	1.00358e-12	8.14614e-13	cenph/mis12/kntc1/si:ch211-161h7.4/cenpk/cenpt/cenpx/cenpw/dlgap5	9
GO:0007052	GO:0007052	mitotic spindle organization	17/488	60/18569	1.41088e-13	2.56696e-12	2.08363e-12	stil/kif4/sass6/cenph/ndc80/zgc:86764/nuf2/aurkb/racgap1/tubg1/rae1/kifc1/aurka/dlgap5/kif23/tpx2/plk1	17
GO:0000226	GO:0000226	microtubule cytoskeleton organization	39/488	369/18569	1.44235e-13	2.58563e-12	2.09878e-12	stil/cenpj/kif4/sass6/cep76/cenph/haus4/haus1/plk4/kif18a/haus6/stmn1a/haus3/haus5/poc1b/cep152/ska1/ndc80/zgc:86764/nuf2/aurkb/si:ch211-266i6.3/knstrn/racgap1/tubgcp2/tubg1/ranbp1/spdl1/rae1/kifc1/aurka/dlgap5/tuba8l4/si:ch211-114n24.6/kif23/tpx2/tubb4b/plk1/nusap1	39
GO:0044774	GO:0044774	mitotic DNA integrity checkpoint signaling	13/488	30/18569	1.9401e-13	3.42752e-12	2.78215e-12	chek1/e2f7/chek2/dtl/topbp1/fancd2/mus81/cdc6/orc1/eme1/tipin/nbn/cdk1	13
GO:0000018	GO:0000018	regulation of DNA recombination	14/488	39/18569	5.15165e-13	8.97122e-12	7.28202e-12	si:ch73-368j24.11/si:dkey-261m9.12/blm/si:ch211-113a14.18/si:dkey-108k21.10/si:ch211-113a14.24/zgc:153405/si:dkey-108k21.21/si:dkey-23a13.17/si:dkey-23a13.9/si:ch73-368j24.12/rmi2/zgc:110425/si:dkey-108k21.14	14
GO:1902850	GO:1902850	microtubule cytoskeleton organization involved in mitosis	19/488	85/18569	5.69029e-13	9.76967e-12	7.93013e-12	stil/kif4/sass6/cenph/ndc80/zgc:86764/nuf2/aurkb/racgap1/tubg1/spdl1/rae1/kifc1/aurka/dlgap5/kif23/tpx2/plk1/nusap1	19
GO:0006275	GO:0006275	regulation of DNA replication	11/488	22/18569	2.00701e-12	3.39797e-11	2.75817e-11	esco2/e2f8/dscc1/e2f7/terf1/pcna/dbf4b/gmnn/timeless/dbf4/tipin	11
GO:0051983	GO:0051983	regulation of chromosome segregation	13/488	35/18569	2.12099e-12	3.54177e-11	2.87489e-11	kntc1/zwilch/rmi2/cdc23/ndc80/zw10/anapc1/mad2l1/bub3/spdl1/mki67/ttk/si:ch211-244o22.2	13
GO:0033260	GO:0033260	nuclear DNA replication	10/488	17/18569	2.36557e-12	3.8968e-11	3.16307e-11	cdc45/pola1/dbf4b/gins3/gins1/lig1/rad51/dbf4/mcm6/mcm3	10
GO:0000077	GO:0000077	DNA damage checkpoint signaling	14/488	43/18569	2.43088e-12	3.951e-11	3.20706e-11	chek1/e2f7/chek2/dtl/topbp1/fancd2/mus81/rad1/wdr76/eme1/tipin/tp53bp1/nbn/cdk1	14
GO:0042770	GO:0042770	signal transduction in response to DNA damage	15/488	58/18569	1.67802e-11	2.65651e-10	2.15631e-10	chek1/e2f7/chek2/dtl/topbp1/fancd2/mus81/rad1/wdr76/eme1/tipin/tp53bp1/nbn/prpf19/cdk1	15
GO:0070828	GO:0070828	heterochromatin organization	15/488	58/18569	1.67802e-11	2.65651e-10	2.15631e-10	hist1h2a6/unga/si:ch1073-153i20.5/hist1h2a3/hist1h2a4/si:dkey-108k21.19/hist1h2a5/pole3/hist1h2a1/h2ax/hat1/ezh2/uhrf1/lmnb2/h2az2a	15
GO:0051304	GO:0051304	chromosome separation	11/488	26/18569	1.99849e-11	3.12328e-10	2.53519e-10	espl1/ncaph2/kntc1/zwilch/cdc23/ndc80/zw10/mad2l1/bub3/spdl1/ttk	11
GO:0051783	GO:0051783	regulation of nuclear division	13/488	42/18569	3.09903e-11	4.78192e-10	3.88153e-10	trip13/fbxo5/kntc1/zwilch/cdc23/ndc80/zw10/mad2l1/bub3/spdl1/mki67/ttk/si:ch211-244o22.2	13
GO:0044773	GO:0044773	mitotic DNA damage checkpoint signaling	11/488	27/18569	3.29314e-11	5.01791e-10	4.07309e-10	chek1/e2f7/chek2/dtl/topbp1/fancd2/mus81/eme1/tipin/nbn/cdk1	11
GO:0051306	GO:0051306	mitotic sister chromatid separation	10/488	21/18569	3.90285e-11	5.87355e-10	4.76762e-10	ncaph2/kntc1/zwilch/cdc23/ndc80/zw10/mad2l1/bub3/spdl1/ttk	10
GO:0033045	GO:0033045	regulation of sister chromatid segregation	11/488	28/18569	5.29644e-11	7.87362e-10	6.39109e-10	kntc1/zwilch/rmi2/cdc23/ndc80/zw10/anapc1/mad2l1/bub3/spdl1/ttk	11
GO:0007088	GO:0007088	regulation of mitotic nuclear division	12/488	36/18569	6.69779e-11	9.83688e-10	7.98469e-10	fbxo5/kntc1/zwilch/cdc23/ndc80/zw10/mad2l1/bub3/spdl1/mki67/ttk/si:ch211-244o22.2	12
GO:0051168	GO:0051168	nuclear export	15/488	69/18569	2.45184e-10	3.49356e-09	2.83576e-09	xpo7/cse1l/nup93/nup85/nup188/nup62l/ranbp3b/phax/nup107/rae1/abce1/xpo1a/ran/ddx39aa/ddx39ab	15
GO:0000727	GO:0000727	double-strand break repair via break-induced replication	8/488	13/18569	2.46469e-10	3.49356e-09	2.83576e-09	cdc45/cdc7/mus81/gins4/gins2/mcm7/mcm6/mcm3	8
GO:1902969	GO:1902969	mitotic DNA replication	8/488	13/18569	2.46469e-10	3.49356e-09	2.83576e-09	cdc45/pola1/gins3/gins1/lig1/rad51/mcm6/mcm3	8
GO:0007091	GO:0007091	metaphase/anaphase transition of mitotic cell cycle	10/488	25/18569	3.2905e-10	4.55809e-09	3.69985e-09	kntc1/zwilch/cdc23/ndc80/zw10/anapc1/mad2l1/bub3/spdl1/ttk	10
GO:0051784	GO:0051784	negative regulation of nuclear division	10/488	25/18569	3.2905e-10	4.55809e-09	3.69985e-09	trip13/fbxo5/kntc1/zwilch/ndc80/zw10/mad2l1/bub3/spdl1/ttk	10
GO:2001251	GO:2001251	negative regulation of chromosome organization	9/488	19/18569	4.06342e-10	5.56551e-09	4.51758e-09	terf1/kntc1/zwilch/ndc80/zw10/mad2l1/bub3/spdl1/ttk	9
GO:0006606	GO:0006606	protein import into nucleus	13/488	51/18569	4.66053e-10	6.31243e-09	5.12386e-09	nutf2l/cse1l/ipo9/nup93/nup85/nup188/nup62l/nup107/kpnb1/kpnb3/nup50/ran/ipo7	13
GO:0044784	GO:0044784	metaphase/anaphase transition of cell cycle	10/488	26/18569	5.22216e-10	6.9954e-09	5.67823e-09	kntc1/zwilch/cdc23/ndc80/zw10/anapc1/mad2l1/bub3/spdl1/ttk	10
GO:0051170	GO:0051170	import into nucleus	13/488	52/18569	6.0668e-10	8.03851e-09	6.52493e-09	nutf2l/cse1l/ipo9/nup93/nup85/nup188/nup62l/nup107/kpnb1/kpnb3/nup50/ran/ipo7	13
GO:0010965	GO:0010965	regulation of mitotic sister chromatid separation	9/488	20/18569	7.21676e-10	9.35876e-09	7.59659e-09	kntc1/zwilch/cdc23/ndc80/zw10/mad2l1/bub3/spdl1/ttk	9
GO:0045839	GO:0045839	negative regulation of mitotic nuclear division	9/488	20/18569	7.21676e-10	9.35876e-09	7.59659e-09	fbxo5/kntc1/zwilch/ndc80/zw10/mad2l1/bub3/spdl1/ttk	9
GO:0050657	GO:0050657	nucleic acid transport	15/488	76/18569	1.03779e-09	1.3042e-08	1.05863e-08	slbp/nutf2l/ndc1/nup93/nup85/nup188/nup62l/phax/nup107/rae1/nup50/ran/ddx39aa/eif4a3/ddx39ab	15
GO:0050658	GO:0050658	RNA transport	15/488	76/18569	1.03779e-09	1.3042e-08	1.05863e-08	slbp/nutf2l/ndc1/nup93/nup85/nup188/nup62l/phax/nup107/rae1/nup50/ran/ddx39aa/eif4a3/ddx39ab	15
GO:0051236	GO:0051236	establishment of RNA localization	15/488	76/18569	1.03779e-09	1.3042e-08	1.05863e-08	slbp/nutf2l/ndc1/nup93/nup85/nup188/nup62l/phax/nup107/rae1/nup50/ran/ddx39aa/eif4a3/ddx39ab	15
GO:0031023	GO:0031023	microtubule organizing center organization	14/488	65/18569	1.11398e-09	1.34024e-08	1.08788e-08	stil/cenpj/sass6/cep76/haus4/haus1/plk4/haus6/haus3/haus5/poc1b/cep152/ranbp1/aurka	14
GO:0034504	GO:0034504	protein localization to nucleus	14/488	65/18569	1.11398e-09	1.34024e-08	1.08788e-08	nutf2l/cse1l/ipo9/nup93/nup85/nup188/nup62l/nup107/kpnb1/kpnb3/lmnb2/nup50/ran/ipo7	14
GO:0007094	GO:0007094	mitotic spindle assembly checkpoint signaling	8/488	15/18569	1.17642e-09	1.34024e-08	1.08788e-08	kntc1/zwilch/ndc80/zw10/mad2l1/bub3/spdl1/ttk	8
GO:0031577	GO:0031577	spindle checkpoint signaling	8/488	15/18569	1.17642e-09	1.34024e-08	1.08788e-08	kntc1/zwilch/ndc80/zw10/mad2l1/bub3/spdl1/ttk	8
GO:0033046	GO:0033046	negative regulation of sister chromatid segregation	8/488	15/18569	1.17642e-09	1.34024e-08	1.08788e-08	kntc1/zwilch/ndc80/zw10/mad2l1/bub3/spdl1/ttk	8
GO:0033048	GO:0033048	negative regulation of mitotic sister chromatid segregation	8/488	15/18569	1.17642e-09	1.34024e-08	1.08788e-08	kntc1/zwilch/ndc80/zw10/mad2l1/bub3/spdl1/ttk	8
GO:0045841	GO:0045841	negative regulation of mitotic metaphase/anaphase transition	8/488	15/18569	1.17642e-09	1.34024e-08	1.08788e-08	kntc1/zwilch/ndc80/zw10/mad2l1/bub3/spdl1/ttk	8
GO:0071173	GO:0071173	spindle assembly checkpoint signaling	8/488	15/18569	1.17642e-09	1.34024e-08	1.08788e-08	kntc1/zwilch/ndc80/zw10/mad2l1/bub3/spdl1/ttk	8
GO:0071174	GO:0071174	mitotic spindle checkpoint signaling	8/488	15/18569	1.17642e-09	1.34024e-08	1.08788e-08	kntc1/zwilch/ndc80/zw10/mad2l1/bub3/spdl1/ttk	8
GO:2000816	GO:2000816	negative regulation of mitotic sister chromatid separation	8/488	15/18569	1.17642e-09	1.34024e-08	1.08788e-08	kntc1/zwilch/ndc80/zw10/mad2l1/bub3/spdl1/ttk	8
GO:0045934	GO:0045934	negative regulation of nucleobase-containing compound metabolic process	36/488	439/18569	1.71523e-09	1.93599e-08	1.57146e-08	e2f8/si:ch73-368j24.11/e2f7/si:dkey-261m9.12/dnmt3bb.3/blm/si:ch211-113a14.18/terf1/si:dkey-108k21.10/si:ch211-113a14.24/znfl2a/zgc:153405/si:dkey-108k21.21/si:dkey-23a13.17/dnmt3bb.2/si:dkey-23a13.9/gmnn/si:ch73-368j24.12/timeless/rmi2/zgc:110425/scmh1/mier1a/si:dkey-108k21.14/men1/tipin/lin37/parp1/daxx/uhrf1/cbx1a/cnbpa/cbx2/rnf168/cbx5/cbx3a	36
GO:0030071	GO:0030071	regulation of mitotic metaphase/anaphase transition	9/488	22/18569	2.03936e-09	2.28071e-08	1.85128e-08	kntc1/zwilch/cdc23/ndc80/zw10/mad2l1/bub3/spdl1/ttk	9
GO:0033047	GO:0033047	regulation of mitotic sister chromatid segregation	8/488	16/18569	2.29884e-09	2.4799e-08	2.01296e-08	kntc1/zwilch/ndc80/zw10/mad2l1/bub3/spdl1/ttk	8
GO:0051985	GO:0051985	negative regulation of chromosome segregation	8/488	16/18569	2.29884e-09	2.4799e-08	2.01296e-08	kntc1/zwilch/ndc80/zw10/mad2l1/bub3/spdl1/ttk	8
GO:1902100	GO:1902100	negative regulation of metaphase/anaphase transition of cell cycle	8/488	16/18569	2.29884e-09	2.4799e-08	2.01296e-08	kntc1/zwilch/ndc80/zw10/mad2l1/bub3/spdl1/ttk	8
GO:1905819	GO:1905819	negative regulation of chromosome separation	8/488	16/18569	2.29884e-09	2.4799e-08	2.01296e-08	kntc1/zwilch/ndc80/zw10/mad2l1/bub3/spdl1/ttk	8
GO:0000086	GO:0000086	G2/M transition of mitotic cell cycle	11/488	38/18569	2.33982e-09	2.50196e-08	2.03087e-08	chek1/foxm1/skp2/dtl/topbp1/cdc6/orc1/cdk2/nbn/cdk1/cdc25b	11
GO:0006403	GO:0006403	RNA localization	15/488	82/18569	3.15104e-09	3.32457e-08	2.69859e-08	slbp/nutf2l/ndc1/nup93/nup85/nup188/nup62l/phax/nup107/rae1/nup50/ran/ddx39aa/eif4a3/ddx39ab	15
GO:0071897	GO:0071897	DNA biosynthetic process	11/488	39/18569	3.18251e-09	3.32457e-08	2.69859e-08	pclaf/tk1/primpol/pole2/terf1/pold1/dtl/pcna/pold3/lig1/rpa1	11
GO:0007098	GO:0007098	centrosome cycle	13/488	59/18569	3.26944e-09	3.32457e-08	2.69859e-08	stil/cenpj/sass6/cep76/haus4/haus1/haus6/haus3/haus5/poc1b/cep152/ranbp1/aurka	13
GO:0051310	GO:0051310	metaphase chromosome alignment	9/488	23/18569	3.27275e-09	3.32457e-08	2.69859e-08	ska1/si:ch211-161h7.4/cdca5/ndc80/nuf2/si:dkey-25o16.4/knl1/knstrn/spdl1	9
GO:1902099	GO:1902099	regulation of metaphase/anaphase transition of cell cycle	9/488	23/18569	3.27275e-09	3.32457e-08	2.69859e-08	kntc1/zwilch/cdc23/ndc80/zw10/mad2l1/bub3/spdl1/ttk	9
GO:1905818	GO:1905818	regulation of chromosome separation	9/488	23/18569	3.27275e-09	3.32457e-08	2.69859e-08	kntc1/zwilch/cdc23/ndc80/zw10/mad2l1/bub3/spdl1/ttk	9
GO:0140694	GO:0140694	non-membrane-bounded organelle assembly	26/488	257/18569	4.65578e-09	4.69041e-08	3.80725e-08	stil/cenpj/sass6/cep76/cenph/haus4/haus1/plk4/haus6/mis12/haus3/kntc1/haus5/poc1b/cep152/si:ch211-161h7.4/cenpk/zgc:86764/cenpt/cenpx/racgap1/tubgcp2/cenpw/kifc1/dlgap5/kif23	26
GO:0033044	GO:0033044	regulation of chromosome organization	12/488	51/18569	5.9369e-09	5.93203e-08	4.81509e-08	terf1/kntc1/zwilch/rmi2/cdc23/ndc80/zw10/anapc1/mad2l1/bub3/spdl1/ttk	12
GO:0044839	GO:0044839	cell cycle G2/M phase transition	11/488	42/18569	7.5689e-09	7.50121e-08	6.0888e-08	chek1/foxm1/skp2/dtl/topbp1/cdc6/orc1/cdk2/nbn/cdk1/cdc25b	11
GO:0015931	GO:0015931	nucleobase-containing compound transport	17/488	119/18569	1.42354e-08	1.39943e-07	1.13593e-07	slc29a2/slbp/nutf2l/ndc1/nup93/nup85/nup188/nup62l/phax/nup107/rae1/nup50/ran/ddx39aa/eif4a3/ddx39ab/slc29a1a	17
GO:0008608	GO:0008608	attachment of spindle microtubules to kinetochore	7/488	14/18569	2.42678e-08	2.36659e-07	1.92098e-07	ska1/si:ch211-161h7.4/ndc80/nuf2/si:dkey-25o16.4/knl1/knstrn	7
GO:0051303	GO:0051303	establishment of chromosome localization	9/488	29/18569	3.48502e-08	3.36032e-07	2.7276e-07	ska1/si:ch211-161h7.4/cdca5/ndc80/nuf2/si:dkey-25o16.4/knl1/knstrn/spdl1	9
GO:0090068	GO:0090068	positive regulation of cell cycle process	10/488	38/18569	3.5009e-08	3.36032e-07	2.7276e-07	e2f8/e2f7/ccne2/dbf4b/cdca5/cdc23/ndc80/dbf4/ranbp1/cdc25b	10
GO:0051225	GO:0051225	spindle assembly	11/488	49/18569	4.36312e-08	4.15519e-07	3.37281e-07	stil/haus4/haus1/haus6/haus3/haus5/zgc:86764/racgap1/tubgcp2/kifc1/kif23	11
GO:0050000	GO:0050000	chromosome localization	9/488	30/18569	4.86342e-08	4.59575e-07	3.73041e-07	ska1/si:ch211-161h7.4/cdca5/ndc80/nuf2/si:dkey-25o16.4/knl1/knstrn/spdl1	9
GO:0036297	GO:0036297	interstrand cross-link repair	8/488	23/18569	7.44569e-08	6.98177e-07	5.66717e-07	fancl/fancc/fanca/dclre1b/faap24/fancd2/rad51ap1/nucks1b	8
GO:0045787	GO:0045787	positive regulation of cell cycle	10/488	42/18569	9.91622e-08	9.22739e-07	7.48996e-07	e2f8/e2f7/ccne2/dbf4b/cdca5/cdc23/ndc80/dbf4/ranbp1/cdc25b	10
GO:0006284	GO:0006284	base-excision repair	8/488	24/18569	1.09128e-07	1.00778e-06	8.18024e-07	unga/neil3/pold1/pole/rpa3/fen1/xrcc1/apex2	8
GO:0007080	GO:0007080	mitotic metaphase chromosome alignment	6/488	11/18569	1.31992e-07	1.20976e-06	9.81977e-07	ska1/si:ch211-161h7.4/cdca5/ndc80/nuf2/spdl1	6
GO:0010389	GO:0010389	regulation of G2/M transition of mitotic cell cycle	9/488	34/18569	1.6237e-07	1.47708e-06	1.19896e-06	chek1/dtl/topbp1/cdc6/orc1/cdk2/nbn/cdk1/cdc25b	9
GO:0000712	GO:0000712	resolution of meiotic recombination intermediates	6/488	12/18569	2.58122e-07	2.33075e-06	1.89189e-06	mus81/cenps/eme1/zgc:85936/cenpx/top2a	6
GO:0044818	GO:0044818	mitotic G2/M transition checkpoint	7/488	19/18569	3.17801e-07	2.84852e-06	2.31217e-06	chek1/dtl/topbp1/cdc6/orc1/nbn/cdk1	7
GO:0045132	GO:0045132	meiotic chromosome segregation	8/488	28/18569	4.20387e-07	3.74052e-06	3.03622e-06	psmc3ip/trip13/espl1/fancd2/si:ch211-161h7.4/nuf2/sgo1/ttk	8
GO:1902749	GO:1902749	regulation of cell cycle G2/M phase transition	9/488	38/18569	4.59584e-07	4.05966e-06	3.29526e-06	chek1/dtl/topbp1/cdc6/orc1/cdk2/nbn/cdk1/cdc25b	9
GO:0007064	GO:0007064	mitotic sister chromatid cohesion	6/488	13/18569	4.68728e-07	4.10238e-06	3.32994e-06	esco2/dscc1/chtf8/cdca5/pds5b/smc3	6
GO:0032392	GO:0032392	DNA geometric change	7/488	20/18569	4.77882e-07	4.10238e-06	3.32994e-06	blm/mcm8/mcm9/mcm7/nbn/mcm6/mcm3	7
GO:0032508	GO:0032508	DNA duplex unwinding	7/488	20/18569	4.77882e-07	4.10238e-06	3.32994e-06	blm/mcm8/mcm9/mcm7/nbn/mcm6/mcm3	7
GO:0034502	GO:0034502	protein localization to chromosome	7/488	20/18569	4.77882e-07	4.10238e-06	3.32994e-06	kntc1/zwilch/vrk1/rpa1/knl1/spdl1/ttk	7
GO:0071103	GO:0071103	DNA conformation change	8/488	29/18569	5.67258e-07	4.83558e-06	3.92508e-06	blm/mcm8/mcm9/mcm7/nbn/top2a/mcm6/mcm3	8
GO:0051028	GO:0051028	mRNA transport	11/488	64/18569	7.80401e-07	6.60631e-06	5.36241e-06	slbp/nutf2l/ndc1/nup93/nup85/nup188/nup107/nup50/ddx39aa/eif4a3/ddx39ab	11
GO:0006298	GO:0006298	mismatch repair	6/488	14/18569	8.02074e-07	6.74295e-06	5.47331e-06	exo1/pcna/msh2/rpa3/msh6/rnaseh2a	6
GO:0007062	GO:0007062	sister chromatid cohesion	8/488	31/18569	9.95468e-07	8.31147e-06	6.7465e-06	esco2/dscc1/chtf8/cdca5/pds5b/stag2b/smc3/smc1al	8
GO:0009262	GO:0009262	deoxyribonucleotide metabolic process	6/488	15/18569	1.30714e-06	1.08395e-05	8.79851e-06	rrm2/tyms/rrm1/dtymk/nudt1/dut	6
GO:0006289	GO:0006289	nucleotide-excision repair	8/488	33/18569	1.67288e-06	1.37787e-05	1.11843e-05	brip1/fancc/pold1/pole/rpa2/pold3/rpa3/rpa1	8
GO:0098534	GO:0098534	centriole assembly	7/488	24/18569	1.94744e-06	1.59324e-05	1.29325e-05	stil/cenpj/sass6/cep76/plk4/poc1b/cep152	7
GO:0010972	GO:0010972	negative regulation of G2/M transition of mitotic cell cycle	7/488	25/18569	2.6438e-06	2.1343e-05	1.73243e-05	chek1/dtl/topbp1/cdc6/orc1/nbn/cdk1	7
GO:0070192	GO:0070192	chromosome organization involved in meiotic cell cycle	7/488	25/18569	2.6438e-06	2.1343e-05	1.73243e-05	ncapd3/psmc3ip/trip13/ncaph2/fancd2/rad51/ncapd2	7
GO:0000731	GO:0000731	DNA synthesis involved in DNA repair	6/488	17/18569	3.09051e-06	2.47851e-05	2.01183e-05	pclaf/primpol/pole2/dtl/pcna/pold3	6
GO:0006405	GO:0006405	RNA export from nucleus	9/488	47/18569	3.11391e-06	2.48095e-05	2.01381e-05	nup93/nup85/nup188/nup62l/phax/nup107/rae1/ddx39aa/ddx39ab	9
GO:1902750	GO:1902750	negative regulation of cell cycle G2/M phase transition	7/488	26/18569	3.5363e-06	2.79919e-05	2.27213e-05	chek1/dtl/topbp1/cdc6/orc1/nbn/cdk1	7
GO:0006301	GO:0006301	postreplication repair	6/488	18/18569	4.53309e-06	3.56506e-05	2.89379e-05	pclaf/primpol/pole2/dtl/rad18/pcna	6
GO:0007095	GO:0007095	mitotic G2 DNA damage checkpoint signaling	5/488	11/18569	4.97819e-06	3.89001e-05	3.15756e-05	chek1/dtl/topbp1/nbn/cdk1	5
GO:0006997	GO:0006997	nucleus organization	8/488	39/18569	6.45403e-06	5.01112e-05	4.06758e-05	nup205/ndc1/nup93/ahctf1/banf1/nup107/lmnb2/tmpoa	8
GO:0000076	GO:0000076	DNA replication checkpoint signaling	5/488	12/18569	8.34967e-06	6.44193e-05	5.22898e-05	topbp1/timeless/cdc6/orc1/tipin	5
GO:0019985	GO:0019985	translesion synthesis	5/488	13/18569	1.32753e-05	0.000101777	8.26133e-05	pclaf/primpol/pole2/dtl/pcna	5
GO:0007099	GO:0007099	centriole replication	6/488	22/18569	1.66599e-05	0.000126928	0.000103028	stil/cenpj/sass6/cep76/poc1b/cep152	6
GO:0010639	GO:0010639	negative regulation of organelle organization	12/488	110/18569	3.23453e-05	0.0002449	0.000198788	terf1/trip13/fbxo5/kntc1/zwilch/ndc80/si:ch211-266i6.3/zw10/mad2l1/bub3/spdl1/ttk	12
GO:0040029	GO:0040029	epigenetic regulation of gene expression	9/488	63/18569	3.72713e-05	0.000280455	0.000227648	unga/dnmt3bb.2/dnmt1/pole3/hat1/ezh2/uhrf1/lmnb2/ddx39ab	9
GO:0033365	GO:0033365	protein localization to organelle	22/488	327/18569	5.82844e-05	0.000435882	0.000353809	stil/kntc1/zwilch/nutf2l/vrk1/cse1l/rpa1/ipo9/nup93/knl1/nup85/nup188/nup62l/spdl1/nup107/kpnb1/kpnb3/lmnb2/ttk/nup50/ran/ipo7	22
GO:0006305	GO:0006305	DNA alkylation	4/488	10/18569	8.72425e-05	0.000633028	0.000513835	dnmt3bb.3/dnmt3bb.2/dnmt1/hells	4
GO:0006306	GO:0006306	DNA methylation	4/488	10/18569	8.72425e-05	0.000633028	0.000513835	dnmt3bb.3/dnmt3bb.2/dnmt1/hells	4
GO:0006611	GO:0006611	protein export from nucleus	4/488	10/18569	8.72425e-05	0.000633028	0.000513835	xpo7/cse1l/ranbp3b/xpo1a	4
GO:0031573	GO:0031573	mitotic intra-S DNA damage checkpoint signaling	4/488	10/18569	8.72425e-05	0.000633028	0.000513835	fancd2/mus81/eme1/tipin	4
GO:0051231	GO:0051231	spindle elongation	4/488	10/18569	8.72425e-05	0.000633028	0.000513835	kif4/zgc:86764/racgap1/kif23	4
GO:0032200	GO:0032200	telomere organization	7/488	43/18569	0.000117731	0.000849192	0.000689297	rad51d/blm/terf1/dclre1b/rpa1/hat1/nbn	7
GO:0009394	GO:0009394	2'-deoxyribonucleotide metabolic process	4/488	11/18569	0.000134251	0.000962657	0.000781397	tyms/dtymk/nudt1/dut	4
GO:0051656	GO:0051656	establishment of organelle localization	15/488	190/18569	0.000155875	0.00111118	0.000901955	ska1/si:ch211-161h7.4/cdca5/ndc80/nuf2/si:dkey-25o16.4/knl1/knstrn/spdl1/abce1/lmnb2/kif23/xpo1a/ran/nusap1	15
GO:0006312	GO:0006312	mitotic recombination	4/488	12/18569	0.000197201	0.00138953	0.00112789	blm/msh2/rad51/rad52	4
GO:0019692	GO:0019692	deoxyribose phosphate metabolic process	4/488	12/18569	0.000197201	0.00138953	0.00112789	tyms/dtymk/nudt1/dut	4
GO:0051298	GO:0051298	centrosome duplication	6/488	35/18569	0.000271281	0.00190053	0.00154268	stil/cenpj/sass6/cep76/poc1b/cep152	6
GO:0045814	GO:0045814	negative regulation of gene expression, epigenetic	7/488	50/18569	0.000311494	0.00216978	0.00176123	unga/dnmt1/pole3/hat1/ezh2/uhrf1/lmnb2	7
GO:0009147	GO:0009147	pyrimidine nucleoside triphosphate metabolic process	5/488	24/18569	0.000345152	0.00239057	0.00194045	tyms/dtymk/ctps1b/uck2b/dut	5
GO:0031507	GO:0031507	heterochromatin formation	6/488	38/18569	0.000431676	0.00297296	0.00241318	unga/pole3/hat1/ezh2/uhrf1/lmnb2	6
GO:1901992	GO:1901992	positive regulation of mitotic cell cycle phase transition	4/488	15/18569	0.00051073	0.00349764	0.00283906	ccne2/cdca5/cdc23/cdc25b	4
GO:0033043	GO:0033043	regulation of organelle organization	24/488	441/18569	0.000666648	0.0044668	0.00362574	stil/cep76/terf1/trip13/fbxo5/stmn1a/kntc1/zwilch/ska1/rmi2/cdc23/ndc80/mcm7/si:ch211-266i6.3/zw10/anapc1/mad2l1/bub3/spdl1/rae1/mki67/ttk/si:ch211-244o22.2/tpx2	24
GO:0006513	GO:0006513	protein monoubiquitination	4/488	16/18569	0.000666905	0.0044668	0.00362574	fancl/ube2t/dtl/rad18	4
GO:0045931	GO:0045931	positive regulation of mitotic cell cycle	4/488	16/18569	0.000666905	0.0044668	0.00362574	ccne2/cdca5/cdc23/cdc25b	4
GO:0051445	GO:0051445	regulation of meiotic cell cycle	4/488	16/18569	0.000666905	0.0044668	0.00362574	trip13/fbxo5/ttk/cdc25b	4
GO:0000723	GO:0000723	telomere maintenance	6/488	42/18569	0.000750699	0.00500056	0.004059	rad51d/blm/terf1/dclre1b/rpa1/nbn	6
GO:0006397	GO:0006397	mRNA processing	20/488	342/18569	0.000767265	0.00508313	0.00412603	slbp/dcps/sart3/prpf19/si:ch211-107m4.1/snrpd1/srrt/crnkl1/nudt21/snrpa1/srsf2a/snrpe/snrpf/dhx15/ddx39aa/eif4a3/puf60a/polr2d/ddx39ab/cirbpa	20
GO:0006221	GO:0006221	pyrimidine nucleotide biosynthetic process	5/488	30/18569	0.00101639	0.00669722	0.00543619	tyms/dtymk/ctps1b/uck2b/dut	5
GO:1901989	GO:1901989	positive regulation of cell cycle phase transition	4/488	18/18569	0.00107549	0.00704852	0.00572135	ccne2/cdca5/cdc23/cdc25b	4
GO:0006220	GO:0006220	pyrimidine nucleotide metabolic process	5/488	32/18569	0.00137564	0.00887377	0.00720292	tyms/dtymk/ctps1b/uck2b/dut	5
GO:0072528	GO:0072528	pyrimidine-containing compound biosynthetic process	5/488	32/18569	0.00137564	0.00887377	0.00720292	tyms/dtymk/ctps1b/uck2b/dut	5
GO:0072527	GO:0072527	pyrimidine-containing compound metabolic process	6/488	47/18569	0.00137583	0.00887377	0.00720292	tk1/tyms/dtymk/ctps1b/uck2b/dut	6
GO:0051129	GO:0051129	negative regulation of cellular component organization	13/488	188/18569	0.00144655	0.00928077	0.00753328	terf1/unga/trip13/fbxo5/kntc1/zwilch/ndc80/si:ch211-266i6.3/zw10/mad2l1/bub3/spdl1/ttk	13
GO:0008380	GO:0008380	RNA splicing	18/488	311/18569	0.00155085	0.00989783	0.00803416	tsen2/grsf1/sart3/prpf19/si:ch211-107m4.1/snrpd1/crnkl1/snrpa1/srsf2a/snrpe/snrpf/hmga1a/dhx15/ddx39aa/eif4a3/puf60a/ddx39ab/cirbpa	18
GO:0072594	GO:0072594	establishment of protein localization to organelle	13/488	190/18569	0.00159074	0.0100996	0.00819792	nutf2l/cse1l/ipo9/nup93/nup85/nup188/nup62l/nup107/kpnb1/kpnb3/nup50/ran/ipo7	13
GO:0045143	GO:0045143	homologous chromosome segregation	4/488	20/18569	0.00163345	0.010317	0.00837439	psmc3ip/trip13/fancd2/si:ch211-161h7.4	4
GO:0060041	GO:0060041	retina development in camera-type eye	17/488	291/18569	0.00187756	0.0117301	0.00952145	tyms/chaf1b/slbp/poc1b/dnmt3bb.2/fen1/ccna2/dnmt1/rfc5/rfc4/sgo1/uba2/mcm3/smarca5/cdk1/ran/plk1	17
GO:0051255	GO:0051255	spindle midzone assembly	3/488	10/18569	0.00188606	0.0117301	0.00952145	zgc:86764/racgap1/kif23	3
GO:0051447	GO:0051447	negative regulation of meiotic cell cycle	3/488	10/18569	0.00188606	0.0117301	0.00952145	trip13/fbxo5/ttk	3
GO:0009148	GO:0009148	pyrimidine nucleoside triphosphate biosynthetic process	4/488	21/18569	0.0019763	0.0121672	0.00987624	tyms/dtymk/ctps1b/uck2b	4
GO:0016925	GO:0016925	protein sumoylation	4/488	21/18569	0.0019763	0.0121672	0.00987624	sumo3b/nsmce2/uba2/sumo3a	4
GO:0006406	GO:0006406	mRNA export from nucleus	5/488	36/18569	0.00236287	0.014474	0.0117487	nup93/nup85/nup107/ddx39aa/ddx39ab	5
GO:1901796	GO:1901796	regulation of signal transduction by p53 class mediator	4/488	23/18569	0.00280514	0.0170973	0.013878	topbp1/nup62l/sart3/prpf19	4
GO:0051054	GO:0051054	positive regulation of DNA metabolic process	5/488	38/18569	0.00301373	0.0182773	0.0148359	e2f8/e2f7/dbf4b/dbf4/rnf168	5
GO:0032465	GO:0032465	regulation of cytokinesis	4/488	24/18569	0.00329713	0.0198971	0.0161506	e2f8/e2f7/aurkb/aurka	4
GO:0000375	GO:0000375	RNA splicing, via transesterification reactions	14/488	233/18569	0.00356177	0.0211795	0.0171916	sart3/prpf19/si:ch211-107m4.1/snrpd1/crnkl1/snrpa1/srsf2a/snrpe/snrpf/ddx39aa/eif4a3/puf60a/ddx39ab/cirbpa	14
GO:0000377	GO:0000377	RNA splicing, via transesterification reactions with bulged adenosine as nucleophile	14/488	233/18569	0.00356177	0.0211795	0.0171916	sart3/prpf19/si:ch211-107m4.1/snrpd1/crnkl1/snrpa1/srsf2a/snrpe/snrpf/ddx39aa/eif4a3/puf60a/ddx39ab/cirbpa	14
GO:0000398	GO:0000398	mRNA splicing, via spliceosome	14/488	233/18569	0.00356177	0.0211795	0.0171916	sart3/prpf19/si:ch211-107m4.1/snrpd1/crnkl1/snrpa1/srsf2a/snrpe/snrpf/ddx39aa/eif4a3/puf60a/ddx39ab/cirbpa	14
GO:0000910	GO:0000910	cytokinesis	8/488	96/18569	0.00377987	0.0223673	0.0181558	e2f8/e2f7/fbxo5/aurkb/racgap1/aurka/kif23/nusap1	8
GO:0006304	GO:0006304	DNA modification	4/488	25/18569	0.00384474	0.0226413	0.0183781	dnmt3bb.3/dnmt3bb.2/dnmt1/hells	4
GO:0016071	GO:0016071	mRNA metabolic process	23/488	477/18569	0.00401065	0.0235047	0.019079	slbp/dcps/sart3/prpf19/si:ch211-107m4.1/snrpd1/srrt/dkc1/crnkl1/nudt21/snrpa1/srsf2a/snrpe/etf1b/cnot9/snrpf/dhx15/ddx39aa/eif4a3/puf60a/polr2d/ddx39ab/cirbpa	23
GO:0051640	GO:0051640	organelle localization	15/488	262/18569	0.0040913	0.0238626	0.0193695	ska1/si:ch211-161h7.4/cdca5/ndc80/nuf2/si:dkey-25o16.4/knl1/knstrn/spdl1/abce1/lmnb2/kif23/xpo1a/ran/nusap1	15
GO:0000281	GO:0000281	mitotic cytokinesis	5/488	41/18569	0.0042192	0.0240325	0.0195074	fbxo5/aurkb/racgap1/kif23/nusap1	5
GO:0072331	GO:0072331	signal transduction by p53 class mediator	5/488	41/18569	0.0042192	0.0240325	0.0195074	e2f7/topbp1/nup62l/sart3/prpf19	5
GO:0000002	GO:0000002	mitochondrial genome maintenance	3/488	13/18569	0.0042387	0.0240325	0.0195074	primpol/polg/tfam	3
GO:0000054	GO:0000054	ribosomal subunit export from nucleus	3/488	13/18569	0.0042387	0.0240325	0.0195074	abce1/xpo1a/ran	3
GO:0033750	GO:0033750	ribosome localization	3/488	13/18569	0.0042387	0.0240325	0.0195074	abce1/xpo1a/ran	3
GO:1902253	GO:1902253	regulation of intrinsic apoptotic signaling pathway by p53 class mediator	3/488	13/18569	0.0042387	0.0240325	0.0195074	topbp1/nup62l/sart3	3
GO:0000387	GO:0000387	spliceosomal snRNP assembly	4/488	26/18569	0.00445078	0.0250023	0.0202946	sart3/snrpd1/snrpe/snrpf	4
GO:0090307	GO:0090307	mitotic spindle assembly	4/488	26/18569	0.00445078	0.0250023	0.0202946	zgc:86764/racgap1/kifc1/kif23	4
GO:0031109	GO:0031109	microtubule polymerization or depolymerization	6/488	61/18569	0.00522945	0.0292417	0.0237358	kif18a/stmn1a/ska1/si:ch211-266i6.3/tubgcp2/tubg1	6
GO:0009129	GO:0009129	pyrimidine nucleoside monophosphate metabolic process	3/488	14/18569	0.00529041	0.0293137	0.0237942	tyms/uck2b/dut	3
GO:0009130	GO:0009130	pyrimidine nucleoside monophosphate biosynthetic process	3/488	14/18569	0.00529041	0.0293137	0.0237942	tyms/uck2b/dut	3
GO:0009124	GO:0009124	nucleoside monophosphate biosynthetic process	5/488	44/18569	0.00573426	0.0316293	0.0256738	tyms/adssl/uck2b/prps1b/dut	5
GO:0045892	GO:0045892	negative regulation of DNA-templated transcription	18/488	360/18569	0.00718954	0.0393006	0.0319007	e2f8/e2f7/dnmt3bb.3/znfl2a/dnmt3bb.2/scmh1/mier1a/men1/lin37/parp1/daxx/uhrf1/cbx1a/cnbpa/cbx2/rnf168/cbx5/cbx3a	18
GO:1902679	GO:1902679	negative regulation of RNA biosynthetic process	18/488	360/18569	0.00718954	0.0393006	0.0319007	e2f8/e2f7/dnmt3bb.3/znfl2a/dnmt3bb.2/scmh1/mier1a/men1/lin37/parp1/daxx/uhrf1/cbx1a/cnbpa/cbx2/rnf168/cbx5/cbx3a	18
GO:0010458	GO:0010458	exit from mitosis	3/488	16/18569	0.00782804	0.0424106	0.0344251	cdca5/mad2l1bp/ttk	3
GO:0045454	GO:0045454	cell redox homeostasis	3/488	16/18569	0.00782804	0.0424106	0.0344251	selenoh/txnrd3/prdx4	3
GO:0022618	GO:0022618	protein-RNA complex assembly	9/488	132/18569	0.00817097	0.0440726	0.0357742	sart3/snrpd1/crnkl1/nudt21/eif3ba/snrpe/snrpf/puf60a/polr2d	9
GO:0031101	GO:0031101	fin regeneration	7/488	88/18569	0.00845094	0.0453819	0.0368369	esco2/pola2/rbbp4/ezh2/rbb4l/smc3/ttk	7
GO:0007129	GO:0007129	homologous chromosome pairing at meiosis	3/488	17/18569	0.00932246	0.0498424	0.0404576	psmc3ip/trip13/fancd2	3
GO:0032259	GO:0032259	methylation	12/488	211/18569	0.0101617	0.054092	0.043907	tyms/dnmt3bb.3/dnmt3bb.2/suv39h1b/dnmt1/shmt1/nsd2/ezh2/ash2l/carm1/hells/prmt1	12
GO:0071826	GO:0071826	protein-RNA complex organization	9/488	137/18569	0.0102978	0.0545781	0.0443015	sart3/snrpd1/crnkl1/nudt21/eif3ba/snrpe/snrpf/puf60a/polr2d	9
GO:0009123	GO:0009123	nucleoside monophosphate metabolic process	5/488	51/18569	0.0106842	0.0563809	0.0457649	tyms/adssl/uck2b/prps1b/dut	5
GO:0009411	GO:0009411	response to UV	3/488	18/18569	0.0109719	0.0576495	0.0467946	primpol/dtl/pold3	3
GO:0006998	GO:0006998	nuclear envelope organization	3/488	19/18569	0.0127789	0.0668562	0.0542678	banf1/lmnb2/tmpoa	3
GO:2000241	GO:2000241	regulation of reproductive process	6/488	75/18569	0.0139738	0.0727951	0.0590884	trip13/fbxo5/brca2/tfam/ttk/cdc25b	6
GO:0000122	GO:0000122	negative regulation of transcription by RNA polymerase II	13/488	248/18569	0.0144223	0.074812	0.0607256	e2f8/e2f7/dnmt3bb.3/znfl2a/dnmt3bb.2/mier1a/lin37/parp1/uhrf1/cbx1a/cbx2/cbx5/cbx3a	13
GO:0051253	GO:0051253	negative regulation of RNA metabolic process	18/488	393/18569	0.016523	0.0853456	0.0692758	e2f8/e2f7/dnmt3bb.3/znfl2a/dnmt3bb.2/scmh1/mier1a/men1/lin37/parp1/daxx/uhrf1/cbx1a/cnbpa/cbx2/rnf168/cbx5/cbx3a	18
GO:2000242	GO:2000242	negative regulation of reproductive process	3/488	22/18569	0.0191648	0.0985731	0.0800127	trip13/fbxo5/ttk	3
GO:0006282	GO:0006282	regulation of DNA repair	4/488	40/18569	0.0204116	0.104545	0.0848603	rmi2/dek/usp1/rnf168	4
GO:0032886	GO:0032886	regulation of microtubule-based process	7/488	105/18569	0.0208051	0.106114	0.0861341	stil/cep76/stmn1a/ska1/si:ch211-266i6.3/rae1/tpx2	7
GO:0080135	GO:0080135	regulation of cellular response to stress	7/488	106/18569	0.0217912	0.110681	0.0898408	topbp1/wdr76/rmi2/dek/usp1/prpf19/rnf168	7
GO:0000082	GO:0000082	G1/S transition of mitotic cell cycle	4/488	41/18569	0.0221621	0.112098	0.0909911	e2f7/ccne2/cdk2/rb1	4
GO:0060216	GO:0060216	definitive hemopoiesis	5/488	62/18569	0.0233181	0.117458	0.0953414	haus3/topbp1/dnmt1/dkc1/sumo3a	5
GO:0031123	GO:0031123	RNA 3'-end processing	5/488	63/18569	0.0248002	0.124409	0.100984	slbp/eri2/dkc1/nudt21/polr2d	5
GO:0044843	GO:0044843	cell cycle G1/S phase transition	4/488	43/18569	0.0259307	0.129547	0.105155	e2f7/ccne2/cdk2/rb1	4
GO:0031468	GO:0031468	nuclear membrane reassembly	2/488	10/18569	0.0269723	0.131733	0.106929	banf1/tmpoa	2
GO:0060236	GO:0060236	regulation of mitotic spindle organization	2/488	10/18569	0.0269723	0.131733	0.106929	rae1/tpx2	2
GO:0070365	GO:0070365	hepatocyte differentiation	2/488	10/18569	0.0269723	0.131733	0.106929	e2f8/e2f7	2
GO:2000765	GO:2000765	regulation of cytoplasmic translation	2/488	10/18569	0.0269723	0.131733	0.106929	cnbpa/cnbpb	2
GO:0007019	GO:0007019	microtubule depolymerization	3/488	25/18569	0.0270167	0.131733	0.106929	kif18a/stmn1a/si:ch211-266i6.3	3
GO:0072332	GO:0072332	intrinsic apoptotic signaling pathway by p53 class mediator	3/488	25/18569	0.0270167	0.131733	0.106929	topbp1/nup62l/sart3	3
GO:2000045	GO:2000045	regulation of G1/S transition of mitotic cell cycle	3/488	26/18569	0.0299601	0.145503	0.118106	e2f7/ccne2/rb1	3
GO:0036089	GO:0036089	cleavage furrow formation	2/488	11/18569	0.032401	0.156114	0.126719	aurkb/kif23	2
GO:0090224	GO:0090224	regulation of spindle organization	2/488	11/18569	0.032401	0.156114	0.126719	rae1/tpx2	2
GO:0018205	GO:0018205	peptidyl-lysine modification	5/488	69/18569	0.0349575	0.167768	0.136179	sumo3b/nsmce2/uba2/senp2/sumo3a	5
GO:0000079	GO:0000079	regulation of cyclin-dependent protein serine/threonine kinase activity	3/488	28/18569	0.0363313	0.172326	0.139879	ccne2/ccna2/ccnb2	3
GO:1902806	GO:1902806	regulation of cell cycle G1/S phase transition	3/488	28/18569	0.0363313	0.172326	0.139879	e2f7/ccne2/rb1	3
GO:1904029	GO:1904029	regulation of cyclin-dependent protein kinase activity	3/488	28/18569	0.0363313	0.172326	0.139879	ccne2/ccna2/ccnb2	3
GO:0042246	GO:0042246	tissue regeneration	8/488	144/18569	0.0365796	0.172832	0.140289	esco2/pola2/rbbp4/ezh2/rbb4l/smc3/ttk/flt4	8
GO:2000116	GO:2000116	regulation of cysteine-type endopeptidase activity	4/488	48/18569	0.0369451	0.173884	0.141144	esco2/cenph/bcl2l16/rb1	4
GO:0006415	GO:0006415	translational termination	2/488	12/18569	0.0382163	0.175134	0.142158	abce1/etf1b	2
GO:0006544	GO:0006544	glycine metabolic process	2/488	12/18569	0.0382163	0.175134	0.142158	dhfr/shmt1	2
GO:0006684	GO:0006684	sphingomyelin metabolic process	2/488	12/18569	0.0382163	0.175134	0.142158	smpd5/smpd4	2
GO:0016445	GO:0016445	somatic diversification of immunoglobulins	2/488	12/18569	0.0382163	0.175134	0.142158	msh2/rnf168	2
GO:0016447	GO:0016447	somatic recombination of immunoglobulin gene segments	2/488	12/18569	0.0382163	0.175134	0.142158	msh2/rnf168	2
GO:1902807	GO:1902807	negative regulation of cell cycle G1/S phase transition	2/488	12/18569	0.0382163	0.175134	0.142158	e2f7/rb1	2
GO:2000134	GO:2000134	negative regulation of G1/S transition of mitotic cell cycle	2/488	12/18569	0.0382163	0.175134	0.142158	e2f7/rb1	2
GO:0097193	GO:0097193	intrinsic apoptotic signaling pathway	5/488	71/18569	0.0388377	0.177315	0.143928	chek1/topbp1/bcl2l16/nup62l/sart3	5
GO:0051302	GO:0051302	regulation of cell division	4/488	49/18569	0.0394247	0.179323	0.145558	e2f8/e2f7/aurkb/aurka	4
GO:0031124	GO:0031124	mRNA 3'-end processing	3/488	29/18569	0.0397565	0.18016	0.146238	slbp/nudt21/polr2d	3
GO:0070507	GO:0070507	regulation of microtubule cytoskeleton organization	5/488	72/18569	0.0408723	0.184531	0.149785	stmn1a/ska1/si:ch211-266i6.3/rae1/tpx2	5
GO:0031017	GO:0031017	exocrine pancreas development	4/488	50/18569	0.0419969	0.188214	0.152775	dnmt3bb.2/dnmt1/nup62l/sart3	4
GO:0035272	GO:0035272	exocrine system development	4/488	50/18569	0.0419969	0.188214	0.152775	dnmt3bb.2/dnmt1/nup62l/sart3	4
GO:0003407	GO:0003407	neural retina development	7/488	123/18569	0.0437659	0.194663	0.15801	slbp/poc1b/dnmt3bb.2/dnmt1/uba2/cdk1/ran	7
GO:0002200	GO:0002200	somatic diversification of immune receptors	2/488	13/18569	0.044394	0.194663	0.15801	msh2/rnf168	2
GO:0002562	GO:0002562	somatic diversification of immune receptors via germline recombination within a single locus	2/488	13/18569	0.044394	0.194663	0.15801	msh2/rnf168	2
GO:0006278	GO:0006278	RNA-templated DNA biosynthetic process	2/488	13/18569	0.044394	0.194663	0.15801	terf1/rpa1	2
GO:0007004	GO:0007004	telomere maintenance via telomerase	2/488	13/18569	0.044394	0.194663	0.15801	terf1/rpa1	2
GO:0071763	GO:0071763	nuclear membrane organization	2/488	13/18569	0.044394	0.194663	0.15801	banf1/tmpoa	2
GO:0061640	GO:0061640	cytoskeleton-dependent cytokinesis	5/488	74/18569	0.0451322	0.19719	0.160061	fbxo5/aurkb/racgap1/kif23/nusap1	5
GO:0010952	GO:0010952	positive regulation of peptidase activity	4/488	53/18569	0.0502691	0.21885	0.177643	esco2/bcl2l16/rb1/zgc:110239	4
GO:0016444	GO:0016444	somatic cell DNA recombination	2/488	14/18569	0.0509113	0.219544	0.178206	msh2/rnf168	2
GO:1902275	GO:1902275	regulation of chromatin organization	2/488	14/18569	0.0509113	0.219544	0.178206	unga/ssrp1a	2
GO:0043280	GO:0043280	positive regulation of cysteine-type endopeptidase activity involved in apoptotic process	3/488	32/18569	0.0509687	0.219544	0.178206	esco2/bcl2l16/rb1	3
GO:0022613	GO:0022613	ribonucleoprotein complex biogenesis	14/488	328/18569	0.0522584	0.224306	0.182072	eri2/sart3/snrpd1/dkc1/abce1/crnkl1/nudt21/xpo1a/eif3ba/snrpe/ran/snrpf/puf60a/polr2d	14
GO:0006886	GO:0006886	intracellular protein transport	16/488	389/18569	0.0525664	0.224516	0.182241	nutf2l/xpo7/cse1l/ipo9/nup93/nup85/nup188/nup62l/ranbp3b/nup107/kpnb1/kpnb3/nup50/xpo1a/ran/ipo7	16
GO:0031099	GO:0031099	regeneration	10/488	211/18569	0.0526755	0.224516	0.182241	esco2/pola2/rbbp4/ezh2/uhrf1/top2a/rbb4l/smc3/ttk/flt4	10
GO:0007292	GO:0007292	female gamete generation	5/488	78/18569	0.0544188	0.231138	0.187617	fancl/trip13/brca2/nemp1/ttk	5
GO:2001056	GO:2001056	positive regulation of cysteine-type endopeptidase activity	3/488	33/18569	0.0550109	0.232036	0.188346	esco2/bcl2l16/rb1	3
GO:2001242	GO:2001242	regulation of intrinsic apoptotic signaling pathway	3/488	33/18569	0.0550109	0.232036	0.188346	topbp1/nup62l/sart3	3
GO:0097190	GO:0097190	apoptotic signaling pathway	8/488	157/18569	0.0557206	0.234219	0.190117	chek1/topbp1/ing5b/bcl2l16/siva1/nup62l/sart3/zgc:110239	8
GO:0009142	GO:0009142	nucleoside triphosphate biosynthetic process	4/488	55/18569	0.0562444	0.235608	0.191245	tyms/dtymk/ctps1b/uck2b	4
GO:0030947	GO:0030947	regulation of vascular endothelial growth factor receptor signaling pathway	2/488	15/18569	0.057746	0.23943	0.194348	flt4/nrp2a	2
GO:0031145	GO:0031145	anaphase-promoting complex-dependent catabolic process	2/488	15/18569	0.057746	0.23943	0.194348	cdc23/anapc1	2
GO:0046653	GO:0046653	tetrahydrofolate metabolic process	2/488	15/18569	0.057746	0.23943	0.194348	dhfr/shmt1	2

## Sheet: tab.go_DEG_Multi36_cluster3
36 hpf cl 3	ID	Description	GeneRatio	BgRatio	pvalue	p.adjust	qvalue	geneID	Count
GO:0001568	GO:0001568	blood vessel development	50/466	495/18569	4.10387e-17	7.87533e-14	6.02621e-14	bmp10/tnnt2a/mb/hapln1b/fn1a/tbx20/has2/sema3aa/unc5b/foxc1b/wnk1b/adgrg6/meis1b/igf2b/ackr3b/lpar2b/lpar1/sdc2/sox11b/calcrla/serpine1/tgfbr3/serpinf1/jcada/gas6/yap1/gmds/nrp1a/spns2/rab13/rcan1a/tal1/fbn2b/aplnra/spry2/reck/amotl2a/nr2f2/ramp2/notch1b/tll1/sirt2/tie1/hspa12b/marcksl1b/elmo1/rtn4a/msna/tek/clec14a	50
GO:0048514	GO:0048514	blood vessel morphogenesis	44/466	439/18569	4.72498e-15	4.53362e-12	3.46913e-12	tnnt2a/mb/hapln1b/fn1a/tbx20/sema3aa/unc5b/wnk1b/adgrg6/meis1b/igf2b/ackr3b/lpar2b/lpar1/sdc2/sox11b/calcrla/serpine1/tgfbr3/serpinf1/jcada/gas6/yap1/nrp1a/spns2/rab13/rcan1a/tal1/fbn2b/aplnra/spry2/reck/amotl2a/ramp2/notch1b/sirt2/tie1/hspa12b/marcksl1b/elmo1/rtn4a/msna/tek/clec14a	44
GO:0001525	GO:0001525	angiogenesis	38/466	353/18569	3.94442e-14	2.52311e-11	1.93069e-11	tnnt2a/hapln1b/fn1a/tbx20/unc5b/wnk1b/adgrg6/meis1b/igf2b/ackr3b/lpar2b/lpar1/sdc2/sox11b/calcrla/serpine1/tgfbr3/serpinf1/jcada/gas6/nrp1a/spns2/rab13/rcan1a/tal1/aplnra/spry2/reck/amotl2a/ramp2/notch1b/sirt2/tie1/hspa12b/elmo1/rtn4a/tek/clec14a	38
GO:0071363	GO:0071363	cellular response to growth factor stimulus	31/466	292/18569	1.36343e-11	4.81254e-09	3.68256e-09	fgf5/bmp10/ntrk3a/sall1a/sfrp5/has2/tgfb3/fstl1a/bmpr1ab/fgfr2/zeb2a/smad6b/smad6a/smad9/lpxn/bmp6/bmp16/bmpr1aa/tgfbr3/bambib/yap1/nrp1a/smad7/fstl1b/fgfr4/acvr1ba/skila/id2a/spry2/cd63/tll1	31
GO:0070848	GO:0070848	response to growth factor	31/466	293/18569	1.48987e-11	4.81254e-09	3.68256e-09	fgf5/bmp10/ntrk3a/sall1a/sfrp5/has2/tgfb3/fstl1a/bmpr1ab/fgfr2/zeb2a/smad6b/smad6a/smad9/lpxn/bmp6/bmp16/bmpr1aa/tgfbr3/bambib/yap1/nrp1a/smad7/fstl1b/fgfr4/acvr1ba/skila/id2a/spry2/cd63/tll1	31
GO:0022603	GO:0022603	regulation of anatomical structure morphogenesis	33/466	330/18569	1.5047e-11	4.81254e-09	3.68256e-09	rspo2/fn1a/sema3aa/sema3gb/unc5b/tiam1a/adgrg6/slit2/meis1b/epha4a/sox11b/myh11a/slit3/kctd12.2/dip2ba/parp3/fmnl2a/serpine1/serpinf1/sema4ab/nrp1a/si:dkey-49n23.1/aplnra/reck/amotl2a/sirt2/tie1/elmo1/vat1/cyfip1/msna/tek/clec14a	33
GO:0048589	GO:0048589	developmental growth	36/466	392/18569	2.06188e-11	5.65249e-09	4.32529e-09	hapln1b/fn1a/tbx20/gata4/has2/sema3aa/sema3gb/myo10l1/dcn/zeb2b/mycb/zeb2a/slit2/anxa1a/gpc4/igf2b/epha4a/cthrc1a/slit3/dip2ba/insra/ccn1/kdm6bb/sema4ab/yap1/nrp1a/si:dkey-49n23.1/fosab/lfng/akap12b/acvr1ba/mdka/serpinh1b/notch1b/cyfip1/hdac1	36
GO:0003318	GO:0003318	cell migration to the midline involved in heart development	10/466	21/18569	2.47963e-11	5.94801e-09	4.55142e-09	gata5/fn1a/gata4/gata6/snai1b/robo1/slit2/sphk2/pdgfra/spns2	10
GO:0040007	GO:0040007	growth	37/466	418/18569	3.14854e-11	6.20203e-09	4.7458e-09	hapln1b/fn1a/tbx20/gata4/has2/sema3aa/sema3gb/myo10l1/dcn/zeb2b/wfdc1/mycb/zeb2a/slit2/anxa1a/gpc4/igf2b/epha4a/cthrc1a/slit3/dip2ba/insra/ccn1/kdm6bb/sema4ab/yap1/nrp1a/si:dkey-49n23.1/fosab/lfng/akap12b/acvr1ba/mdka/serpinh1b/notch1b/cyfip1/hdac1	37
GO:0060973	GO:0060973	cell migration involved in heart development	11/466	28/18569	3.23191e-11	6.20203e-09	4.7458e-09	gata5/fn1a/gata4/gata6/snai1b/robo1/slit2/sphk2/sdc2/pdgfra/spns2	11
GO:0001667	GO:0001667	ameboidal-type cell migration	28/466	252/18569	4.64421e-11	8.10204e-09	6.19969e-09	nrg2a/cdh1/wnt11/pcdh10a/fn1a/has2/sema3aa/snai1b/ptges/sema3gb/foxc1b/zeb2b/zeb2a/gpc4/lpxn/cthrc1a/pdgfra/sema4ab/nrp1a/si:dkey-49n23.1/rab13/celsr1a/aplnra/reck/amotl2a/cnn2/snai1a/tek	28
GO:0003007	GO:0003007	heart morphogenesis	27/466	260/18569	4.80777e-10	7.68843e-08	5.88319e-08	gata5/nrg2a/tnnt2a/hand2/wnt11/fn1a/tbx20/gata4/has2/gata6/snai1b/robo1/ppp2r3a/adgrg6/slit2/meis1b/chsy1/sphk2/zfpm1/pdgfra/bmpr1aa/yap1/spns2/tal1/fbn2b/nr2f1a/hdac1	27
GO:0141091	GO:0141091	transforming growth factor beta receptor superfamily signaling pathway	23/466	200/18569	1.30591e-09	1.92772e-07	1.4751e-07	bmp10/sfrp5/has2/tgfb3/fstl1a/bmpr1ab/smad6b/smad6a/smad9/lpxn/bmp6/bmp16/bmpr1aa/tgfbr3/bambib/yap1/smad7/fstl1b/acvr1ba/skila/aplnra/id2a/tll1	23
GO:0007178	GO:0007178	transmembrane receptor protein serine/threonine kinase signaling pathway	23/466	204/18569	1.92803e-09	2.64277e-07	2.02225e-07	bmp10/sfrp5/has2/tgfb3/fstl1a/bmpr1ab/smad6b/smad6a/smad9/lpxn/bmp6/bmp16/bmpr1aa/tgfbr3/bambib/yap1/smad7/fstl1b/acvr1ba/skila/aplnra/id2a/tll1	23
GO:0045595	GO:0045595	regulation of cell differentiation	37/466	498/18569	4.23564e-09	5.4188e-07	4.14647e-07	hapln1b/ek1/edn1/cdh4/sema3aa/errfi1a/il34/sema3gb/tiam1a/f2r/fgfr2/slc18a2/slit2/igf2b/epha4a/ccn2a/sox5/myh11a/pdgfra/slit3/dip2ba/parp3/dld/ccn1/serpinf1/sema4ab/si:dkey-49n23.1/tal1/fgfr4/lfng/gpr182/id2a/reck/wdfy2/sirt2/hdac1/clec14a	37
GO:0060914	GO:0060914	heart formation	10/466	33/18569	4.96535e-09	5.95531e-07	4.55701e-07	gata5/fn1a/gata4/gata6/snai1b/robo1/slit2/pdgfra/yap1/hdac1	10
GO:0007169	GO:0007169	transmembrane receptor protein tyrosine kinase signaling pathway	28/466	315/18569	7.68748e-09	8.6778e-07	6.64027e-07	fgf5/ntrk3a/ephb2b/sall1a/blk/ek1/errfi1a/efnb3b/foxc1b/fgfr2/zeb2a/igf2b/epha4a/efna3b/pdgfra/insra/efnb3a/epha7/nrp1a/fgfr4/efna1b/grb10a/spry2/anks1ab/cd63/tie1/yrk/tek	28
GO:0003260	GO:0003260	cardioblast migration	7/466	14/18569	1.76652e-08	1.78419e-06	1.36526e-06	gata5/gata4/gata6/snai1b/robo1/slit2/pdgfra	7
GO:0060975	GO:0060975	cardioblast migration to the midline involved in heart field formation	7/466	14/18569	1.76652e-08	1.78419e-06	1.36526e-06	gata5/gata4/gata6/snai1b/robo1/slit2/pdgfra	7
GO:2000026	GO:2000026	regulation of multicellular organismal development	34/466	459/18569	1.98309e-08	1.87022e-06	1.4311e-06	hapln1b/tbx20/gbx2/sema3aa/errfi1a/il34/tgfb3/sema3gb/unc5b/tiam1a/adgrg6/slit2/meis1b/epha4a/sox11b/sox5/myh11a/slit3/dip2ba/serpine1/ecm1b/serpinf1/sema4ab/si:dkey-49n23.1/spns2/tal1/aplnra/reck/sirt2/tie1/elmo1/tek/hdac1/clec14a	34
GO:0048863	GO:0048863	stem cell differentiation	25/466	269/18569	2.04662e-08	1.87022e-06	1.4311e-06	adarb1a/nrg2a/tnnt2a/hand2/fn1a/edn1/sema3aa/tgfb3/sema3gb/foxc1b/zeb2b/f2r/fgfr2/pdgfra/dld/sema4ab/nrp1a/si:dkey-49n23.1/tal1/fosab/fgfr4/efna1b/gpr182/notch1b/hdac1	25
GO:0060026	GO:0060026	convergent extension	19/466	165/18569	3.52512e-08	3.07487e-06	2.35289e-06	gata5/gata4/has2/gata6/snai1b/robo1/dcn/zeb2b/zeb2a/slit2/gpc4/cthrc1a/pdgfra/mcu/akap12b/amotl2a/fzd7b/hdac1/kdm6a	19
GO:0048645	GO:0048645	animal organ formation	10/466	40/18569	3.88453e-08	3.24105e-06	2.48006e-06	gata5/fn1a/gata4/gata6/snai1b/robo1/slit2/pdgfra/yap1/hdac1	10
GO:0001501	GO:0001501	skeletal system development	31/466	407/18569	4.53194e-08	3.62366e-06	2.77283e-06	adarb1a/rspo2/hand2/wnt11/hapln1b/fn1a/edn1/plod2/bmp3/tgfb3/foxc1b/dcn/cyp26b1/fgfr2/ece1/meis1b/gpc4/lpar1/chsy1/ctsk/sphk2/sox5/pdgfra/yap1/nrp1a/spns2/plcb3/marcksl1b/wls/hdac1/kdm6a	31
GO:0060974	GO:0060974	cell migration involved in heart formation	7/466	17/18569	9.37601e-08	7.19703e-06	5.50717e-06	gata5/gata4/gata6/snai1b/robo1/slit2/pdgfra	7
GO:0035162	GO:0035162	embryonic hemopoiesis	14/466	96/18569	1.18259e-07	8.72841e-06	6.67899e-06	alas2/trim2a/tbx20/prkcbb/drll.3/meis1b/lpar1/kdm6bb/yap1/tspo/tal1/myct1a/tmem88a/tll1	14
GO:0048013	GO:0048013	ephrin receptor signaling pathway	8/466	26/18569	1.55575e-07	1.10573e-05	8.46109e-06	ephb2b/ek1/efnb3b/efna3b/efnb3a/epha7/efna1b/anks1ab	8
GO:0002244	GO:0002244	hematopoietic progenitor cell differentiation	16/466	138/18569	3.86799e-07	2.50519e-05	1.91697e-05	tnnt2a/tgfb3/mycb/f2r/fgfr2/pdgfra/dld/mgst1.1/tal1/fosab/fgfr4/efna1b/jun/gpr182/notch1b/hdac1	16
GO:0008283	GO:0008283	cell population proliferation	30/466	425/18569	3.89032e-07	2.50519e-05	1.91697e-05	fgf5/hapln1b/tbx20/cyp2r1/thpo/il34/tgfb3/adora2aa/mycb/fgfr2/ankrd45/meis1b/igf2b/socs3a/lgals9l3/kdm6bb/lgals9l1/jcada/gmds/fbn2b/junba/jun/aplnra/id2a/nr2f1a/amotl2a/sirt2/tek/wls/hdac1	30
GO:0031099	GO:0031099	regeneration	20/466	211/18569	3.91639e-07	2.50519e-05	1.91697e-05	hapln1b/gata4/has2/mycb/anxa1a/igf2b/epha4a/fhl1b/ccn2a/socs3a/ccn1/kdm6bb/yap1/fosab/lfng/acvr1ba/mdka/serpinh1b/notch1b/hdac1	20
GO:0060560	GO:0060560	developmental growth involved in morphogenesis	19/466	193/18569	4.26642e-07	2.64105e-05	2.02094e-05	fn1a/sema3aa/sema3gb/myo10l1/dcn/zeb2b/zeb2a/slit2/gpc4/epha4a/cthrc1a/slit3/dip2ba/sema4ab/nrp1a/si:dkey-49n23.1/akap12b/cyfip1/hdac1	19
GO:0007369	GO:0007369	gastrulation	23/466	276/18569	5.37674e-07	3.22437e-05	2.46729e-05	gata5/cdh1/wnt11/drl/fn1a/has2/snai1b/ptges/zeb2b/zeb2a/gpc4/lpar1/cthrc1a/sdc2/mcu/tal1/acvr1ba/celsr1a/aplnra/tll1/fzd7b/snai1a/kdm6a	23
GO:0002040	GO:0002040	sprouting angiogenesis	16/466	144/18569	6.92435e-07	3.64178e-05	2.78669e-05	hapln1b/fn1a/adgrg6/igf2b/sdc2/sox11b/tgfbr3/jcada/gas6/nrp1a/rcan1a/aplnra/reck/hspa12b/rtn4a/clec14a	16
GO:0042246	GO:0042246	tissue regeneration	16/466	144/18569	6.92435e-07	3.64178e-05	2.78669e-05	hapln1b/gata4/has2/mycb/anxa1a/igf2b/ccn1/kdm6bb/yap1/fosab/lfng/acvr1ba/mdka/serpinh1b/notch1b/hdac1	16
GO:0030509	GO:0030509	BMP signaling pathway	15/466	127/18569	7.02166e-07	3.64178e-05	2.78669e-05	bmp10/sfrp5/has2/fstl1a/bmpr1ab/smad6a/smad9/bmp6/bmp16/bmpr1aa/yap1/fstl1b/skila/id2a/tll1	15
GO:0071772	GO:0071772	response to BMP	15/466	127/18569	7.02166e-07	3.64178e-05	2.78669e-05	bmp10/sfrp5/has2/fstl1a/bmpr1ab/smad6a/smad9/bmp6/bmp16/bmpr1aa/yap1/fstl1b/skila/id2a/tll1	15
GO:0071773	GO:0071773	cellular response to BMP stimulus	15/466	127/18569	7.02166e-07	3.64178e-05	2.78669e-05	bmp10/sfrp5/has2/fstl1a/bmpr1ab/smad6a/smad9/bmp6/bmp16/bmpr1aa/yap1/fstl1b/skila/id2a/tll1	15
GO:0060029	GO:0060029	convergent extension involved in organogenesis	7/466	22/18569	7.37326e-07	3.72349e-05	2.84922e-05	gata5/gata4/gata6/snai1b/robo1/slit2/pdgfra	7
GO:0042074	GO:0042074	cell migration involved in gastrulation	12/466	82/18569	9.13966e-07	4.49718e-05	3.44125e-05	cdh1/wnt11/has2/snai1b/ptges/zeb2b/zeb2a/gpc4/cthrc1a/celsr1a/aplnra/snai1a	12
GO:0048562	GO:0048562	embryonic organ morphogenesis	31/466	470/18569	1.06972e-06	5.13199e-05	3.92701e-05	mfap5/adarb1a/gata5/tnnt2a/hand2/wnt11/sfrp5/fn1a/edn1/tbx20/gata4/has2/bmp3/pax2a/ppp2r3a/cyp26b1/adgrg6/ece1/meis1b/epha4a/chsy1/sphk2/sox11b/zfpm1/pdgfra/bmpr1aa/spns2/plcb3/fbn2b/wls/kdm6a	31
GO:0060485	GO:0060485	mesenchyme development	21/466	249/18569	1.38171e-06	6.46707e-05	4.94861e-05	adarb1a/nrg2a/hand2/ek1/fn1a/edn1/sema3aa/sema3gb/foxc1b/zeb2b/fgfr2/zeb2a/pdgfra/parp3/dld/tgfbr3/sema4ab/nrp1a/si:dkey-49n23.1/tal1/snai1a	21
GO:0060218	GO:0060218	hematopoietic stem cell differentiation	12/466	87/18569	1.747e-06	7.80193e-05	5.97005e-05	tnnt2a/tgfb3/f2r/fgfr2/dld/tal1/fosab/fgfr4/efna1b/gpr182/notch1b/hdac1	12
GO:0051216	GO:0051216	cartilage development	18/466	192/18569	1.74822e-06	7.80193e-05	5.97005e-05	fn1a/edn1/tgfb3/foxc1b/dcn/cyp26b1/fgfr2/gpc4/lpar1/chsy1/ctsk/sox5/yap1/nrp1a/spns2/plcb3/marcksl1b/wls	18
GO:0051093	GO:0051093	negative regulation of developmental process	17/466	174/18569	1.91843e-06	8.36696e-05	6.40241e-05	sema3aa/sema3gb/unc5b/f2r/slit2/epha4a/slit3/socs3a/dip2ba/serpine1/serpinf1/sema4ab/si:dkey-49n23.1/lfng/gpr182/sirt2/vat1	17
GO:0048925	GO:0048925	lateral line system development	15/466	140/18569	2.44356e-06	0.000104204	7.97371e-05	adarb1a/wnt11/edn1/cdh4/snai1b/wnk1b/adgrg6/gpc4/ackr3b/lpar2b/socs3a/cdh6/yap1/fzd7b/rtn4a	15
GO:0045765	GO:0045765	regulation of angiogenesis	12/466	90/18569	2.5205e-06	0.000105149	8.046e-05	unc5b/adgrg6/meis1b/sox11b/serpine1/serpinf1/aplnra/reck/sirt2/tie1/elmo1/tek	12
GO:0030517	GO:0030517	negative regulation of axon extension	8/466	37/18569	3.01656e-06	0.000123166	9.42465e-05	sema3aa/sema3gb/slit2/epha4a/slit3/dip2ba/sema4ab/si:dkey-49n23.1	8
GO:0048732	GO:0048732	gland development	21/466	264/18569	3.51079e-06	0.000140358	0.000107402	gata5/hand2/sfrp5/fn1a/gata4/gata6/pax2a/foxc1b/fzd5/zeb2b/fgfr2/fhl1b/ptger2a/socs3a/dld/yap1/nrp1a/tal1/aplnra/id2a/hdac1	21
GO:0010977	GO:0010977	negative regulation of neuron projection development	9/466	50/18569	3.67162e-06	0.000143793	0.00011003	sema3aa/sema3gb/slit2/epha4a/slit3/socs3a/dip2ba/sema4ab/si:dkey-49n23.1	9
GO:0048565	GO:0048565	digestive tract development	13/466	110/18569	3.84211e-06	0.00014746	0.000112837	gata5/mb/hand2/sfrp5/tbx20/gata6/fgfr2/sdc2/myh11a/dld/yap1/flna/hdac1	13
GO:0098609	GO:0098609	cell-cell adhesion	29/466	451/18569	3.93888e-06	0.00014821	0.000113411	pcdh15b/cntn3a.1/pcdh11/cdh1/igdcc3/pcdh10a/fn1a/cdh4/snai1b/si:ch73-208g10.1/sdk1a/adgrl2a/cxadr/f2r/igf2b/pdgfra/lgals9l3/cdh6/lgals9l1/arvcfb/itga9/icam3/celsr1a/si:ch211-66e2.3/notch1b/tie1/fblim1/flot1b/itga6l	29
GO:0061448	GO:0061448	connective tissue development	18/466	205/18569	4.44759e-06	0.00016347	0.000125087	fn1a/edn1/tgfb3/foxc1b/dcn/cyp26b1/fgfr2/gpc4/lpar1/chsy1/ctsk/sox5/yap1/nrp1a/spns2/plcb3/marcksl1b/wls	18
GO:0050771	GO:0050771	negative regulation of axonogenesis	8/466	39/18569	4.59999e-06	0.00016347	0.000125087	sema3aa/sema3gb/slit2/epha4a/slit3/dip2ba/sema4ab/si:dkey-49n23.1	8
GO:0060840	GO:0060840	artery development	8/466	39/18569	4.59999e-06	0.00016347	0.000125087	bmp10/tnnt2a/sema3aa/meis1b/calcrla/tal1/amotl2a/notch1b	8
GO:0061008	GO:0061008	hepaticobiliary system development	16/466	167/18569	4.94703e-06	0.000169524	0.00012972	gata5/sfrp5/gata4/gata6/foxc1b/fzd5/zeb2b/fgfr2/fhl1b/socs3a/dld/add3a/yap1/aplnra/id2a/hdac1	16
GO:0090287	GO:0090287	regulation of cellular response to growth factor stimulus	16/466	167/18569	4.94703e-06	0.000169524	0.00012972	sall1a/sfrp5/has2/fstl1a/zeb2a/smad6a/smad9/bmp16/tgfbr3/bambib/nrp1a/fstl1b/skila/spry2/cd63/tll1	16
GO:0031345	GO:0031345	negative regulation of cell projection organization	9/466	53/18569	6.07554e-06	0.000204543	0.000156517	sema3aa/sema3gb/slit2/epha4a/slit3/socs3a/dip2ba/sema4ab/si:dkey-49n23.1	9
GO:1901342	GO:1901342	regulation of vasculature development	12/466	98/18569	6.23683e-06	0.000206353	0.000157902	unc5b/adgrg6/meis1b/sox11b/serpine1/serpinf1/aplnra/reck/sirt2/tie1/elmo1/tek	12
GO:0048762	GO:0048762	mesenchymal cell differentiation	17/466	191/18569	6.8192e-06	0.000221797	0.00016972	adarb1a/nrg2a/ek1/fn1a/edn1/sema3aa/sema3gb/foxc1b/zeb2b/zeb2a/pdgfra/parp3/tgfbr3/sema4ab/nrp1a/si:dkey-49n23.1/snai1a	17
GO:0055123	GO:0055123	digestive system development	15/466	153/18569	7.36207e-06	0.000235464	0.000180177	gata5/mb/hand2/sfrp5/tbx20/gata6/fgfr2/ptger2a/sdc2/myh11a/bhmt/dld/yap1/flna/hdac1	15
GO:0050768	GO:0050768	negative regulation of neurogenesis	9/466	55/18569	8.33835e-06	0.000262316	0.000200725	sema3aa/sema3gb/slit2/epha4a/slit3/dip2ba/sema4ab/si:dkey-49n23.1/sirt2	9
GO:0048640	GO:0048640	negative regulation of developmental growth	8/466	43/18569	9.9288e-06	0.000307312	0.000235156	sema3aa/sema3gb/slit2/epha4a/slit3/dip2ba/sema4ab/si:dkey-49n23.1	8
GO:0031101	GO:0031101	fin regeneration	11/466	88/18569	1.24153e-05	0.000378174	0.000289379	has2/anxa1a/igf2b/ccn1/kdm6bb/yap1/lfng/acvr1ba/serpinh1b/notch1b/hdac1	11
GO:0051961	GO:0051961	negative regulation of nervous system development	9/466	58/18569	1.30652e-05	0.000391752	0.000299769	sema3aa/sema3gb/slit2/epha4a/slit3/dip2ba/sema4ab/si:dkey-49n23.1/sirt2	9
GO:0090066	GO:0090066	regulation of anatomical structure size	20/466	266/18569	1.37812e-05	0.000406862	0.000311332	myo3b/edn1/vill/edn2/sema3aa/sema3gb/ssh1a/slit2/epha4a/urp1/adrb2a/slit3/dip2ba/slc12a7b/add3a/sema4ab/si:dkey-49n23.1/vaspb/svild/cyfip1	20
GO:0009611	GO:0009611	response to wounding	15/466	162/18569	1.47127e-05	0.000427783	0.00032734	f8/mylka/prkcbb/vwf/f2r/epha4a/sox11b/socs3a/thbd/serpine1/pla2g4aa/nrp1a/eppk1/rhoca/f13a1b	15
GO:0040011	GO:0040011	locomotion	26/466	409/18569	1.52192e-05	0.000433839	0.000331974	fgf5/mylka/ackr4b/sema3aa/sema3gb/slit2/arhgap4a/gpc4/ackr3b/stk10/pdgfra/slit3/ccn1/sema4ab/nrp1a/si:dkey-49n23.1/spns2/rab13/lgals3b/reck/amotl2a/rap2c/yrk/cnn2/rtn4a/tek	26
GO:0060562	GO:0060562	epithelial tube morphogenesis	20/466	268/18569	1.53731e-05	0.000433839	0.000331974	gata5/tnnt2a/hand2/cdh1/wnt11/fn1a/tbx20/gata4/has2/pax2a/unc5b/ppp2r3a/meis1b/zfpm1/bmpr1aa/spns2/mdka/vaspb/marcksl1b/msna	20
GO:0001889	GO:0001889	liver development	15/466	163/18569	1.5838e-05	0.000440479	0.000337055	gata5/sfrp5/gata4/gata6/foxc1b/fzd5/zeb2b/fgfr2/fhl1b/socs3a/dld/yap1/aplnra/id2a/hdac1	15
GO:0050770	GO:0050770	regulation of axonogenesis	11/466	92/18569	1.90569e-05	0.000520109	0.000397988	sema3aa/sema3gb/tiam1a/slit2/epha4a/slit3/dip2ba/sema4ab/nrp1a/si:dkey-49n23.1/clec14a	11
GO:0120035	GO:0120035	regulation of plasma membrane bounded cell projection organization	18/466	228/18569	1.92432e-05	0.000520109	0.000397988	ntrk3a/myo3b/sema3aa/sema3gb/tiam1a/slit2/eps8a/epha4a/gpm6ab/slit3/kctd12.2/socs3a/dip2ba/sema4ab/nrp1a/si:dkey-49n23.1/selenow2a/clec14a	18
GO:0001945	GO:0001945	lymph vessel development	10/466	76/18569	1.95165e-05	0.000520169	0.000398034	bmpr1ab/nfatc1/lpar1/bmpr1aa/itga9/junba/aplnra/nr2f2/notch1b/elmo1	10
GO:0001570	GO:0001570	vasculogenesis	9/466	61/18569	1.9907e-05	0.000523309	0.000400437	mb/tbx20/sema3aa/ackr3b/yap1/nrp1a/tal1/fbn2b/aplnra	9
GO:0031344	GO:0031344	regulation of cell projection organization	18/466	230/18569	2.16403e-05	0.000561187	0.000429421	ntrk3a/myo3b/sema3aa/sema3gb/tiam1a/slit2/eps8a/epha4a/gpm6ab/slit3/kctd12.2/socs3a/dip2ba/sema4ab/nrp1a/si:dkey-49n23.1/selenow2a/clec14a	18
GO:0030308	GO:0030308	negative regulation of cell growth	8/466	48/18569	2.31495e-05	0.000592319	0.000453243	sema3aa/sema3gb/slit2/epha4a/slit3/dip2ba/sema4ab/si:dkey-49n23.1	8
GO:0042127	GO:0042127	regulation of cell population proliferation	21/466	301/18569	2.60234e-05	0.00065709	0.000502806	fgf5/hapln1b/tbx20/il34/tgfb3/adora2aa/mycb/fgfr2/meis1b/igf2b/lgals9l3/lgals9l1/jcada/gmds/fbn2b/junba/jun/aplnra/id2a/sirt2/hdac1	21
GO:0035051	GO:0035051	cardiocyte differentiation	10/466	79/18569	2.75472e-05	0.000686534	0.000525337	gata5/hand2/fn1a/bmpr1ab/bmpr1aa/icam3/fbn2b/tmem88a/nr2f1a/nr2f2	10
GO:0007179	GO:0007179	transforming growth factor beta receptor signaling pathway	9/466	64/18569	2.95806e-05	0.000709564	0.000542959	tgfb3/smad6b/smad6a/smad9/lpxn/tgfbr3/bambib/smad7/skila	9
GO:0071559	GO:0071559	response to transforming growth factor beta	9/466	64/18569	2.95806e-05	0.000709564	0.000542959	tgfb3/smad6b/smad6a/smad9/lpxn/tgfbr3/bambib/smad7/skila	9
GO:0071560	GO:0071560	cellular response to transforming growth factor beta stimulus	9/466	64/18569	2.95806e-05	0.000709564	0.000542959	tgfb3/smad6b/smad6a/smad9/lpxn/tgfbr3/bambib/smad7/skila	9
GO:0009953	GO:0009953	dorsal/ventral pattern formation	14/466	154/18569	3.46462e-05	0.000820816	0.000628089	edn1/zeb2b/bmpr1ab/zeb2a/smad9/sox11b/bmpr1aa/yap1/fstl1b/acvr1ba/spry2/tll1/snai1a/hdac1	14
GO:0061371	GO:0061371	determination of heart left/right asymmetry	17/466	218/18569	3.81439e-05	0.00089266	0.000683065	tnnt2a/hand2/wnt11/fn1a/tbx20/gata4/has2/foxc1b/ppp2r3a/bmpr1ab/fgfr2/meis1b/zfpm1/bmpr1aa/yap1/flna/aplnra	17
GO:0048701	GO:0048701	embryonic cranial skeleton morphogenesis	15/466	176/18569	3.9141e-05	0.000904959	0.000692475	adarb1a/hand2/wnt11/fn1a/edn1/bmp3/cyp26b1/ece1/meis1b/sphk2/pdgfra/spns2/plcb3/wls/kdm6a	15
GO:0048592	GO:0048592	eye morphogenesis	18/466	242/18569	4.24833e-05	0.000970163	0.00074237	mfap5/rab11fip4a/sfrp5/fn1a/cdh4/pax2a/foxc1b/meis1b/epha4a/cpamd8/chsy1/sox11b/socs3a/cdh6/gmds/ccnd1/id2a/hdac1	18
GO:0090132	GO:0090132	epithelium migration	9/466	67/18569	4.29723e-05	0.000970163	0.00074237	cdh1/pcdh10a/fn1a/lpxn/nrp1a/rab13/reck/cnn2/tek	9
GO:0061564	GO:0061564	axon development	28/466	488/18569	4.58351e-05	0.00102276	0.000782619	cntn3a.1/ephb2b/elavl4/ek1/sema3aa/sema3gb/unc5b/efnb3b/myo10l1/robo1/tiam1a/slit2/epha4a/efna3b/slit3/socs3a/dip2ba/efnb3a/epha7/sema4ab/nrp1a/si:dkey-49n23.1/efna1b/notch1b/vaspb/rtn4a/cyfip1/clec14a	28
GO:0007409	GO:0007409	axonogenesis	26/466	437/18569	4.69455e-05	0.00102418	0.000783705	cntn3a.1/ephb2b/elavl4/sema3aa/sema3gb/unc5b/efnb3b/myo10l1/robo1/tiam1a/slit2/epha4a/efna3b/slit3/dip2ba/efnb3a/epha7/sema4ab/nrp1a/si:dkey-49n23.1/efna1b/notch1b/vaspb/rtn4a/cyfip1/clec14a	26
GO:0060395	GO:0060395	SMAD protein signal transduction	5/466	17/18569	4.69661e-05	0.00102418	0.000783705	smad6b/smad6a/smad9/bmpr1aa/smad7	5
GO:0045926	GO:0045926	negative regulation of growth	8/466	53/18569	4.87252e-05	0.0010506	0.000803923	sema3aa/sema3gb/slit2/epha4a/slit3/dip2ba/sema4ab/si:dkey-49n23.1	8
GO:0042060	GO:0042060	wound healing	11/466	102/18569	5.0453e-05	0.00107577	0.000823181	f8/mylka/prkcbb/vwf/f2r/thbd/serpine1/nrp1a/eppk1/rhoca/f13a1b	11
GO:0007411	GO:0007411	axon guidance	19/466	269/18569	5.30341e-05	0.00109587	0.000838559	cntn3a.1/ephb2b/sema3aa/sema3gb/unc5b/efnb3b/robo1/slit2/efna3b/slit3/efnb3a/epha7/sema4ab/nrp1a/si:dkey-49n23.1/efna1b/vaspb/rtn4a/cyfip1	19
GO:0097485	GO:0097485	neuron projection guidance	19/466	269/18569	5.30341e-05	0.00109587	0.000838559	cntn3a.1/ephb2b/sema3aa/sema3gb/unc5b/efnb3b/robo1/slit2/efna3b/slit3/efnb3a/epha7/sema4ab/nrp1a/si:dkey-49n23.1/efna1b/vaspb/rtn4a/cyfip1	19
GO:0045596	GO:0045596	negative regulation of cell differentiation	12/466	121/18569	5.34394e-05	0.00109587	0.000838559	sema3aa/sema3gb/f2r/slit2/epha4a/slit3/dip2ba/sema4ab/si:dkey-49n23.1/lfng/gpr182/sirt2	12
GO:0048705	GO:0048705	skeletal system morphogenesis	17/466	224/18569	5.36798e-05	0.00109587	0.000838559	adarb1a/hand2/wnt11/fn1a/edn1/bmp3/cyp26b1/ece1/meis1b/gpc4/ctsk/sphk2/pdgfra/spns2/plcb3/wls/kdm6a	17
GO:0060028	GO:0060028	convergent extension involved in axis elongation	7/466	40/18569	5.45324e-05	0.00110156	0.000842911	dcn/zeb2b/zeb2a/gpc4/cthrc1a/akap12b/hdac1	7
GO:2000145	GO:2000145	regulation of cell motility	18/466	249/18569	6.15821e-05	0.001231	0.000941963	fgf5/mylka/sema3aa/sema3gb/arhgap4a/gpc4/stk10/ccn1/sema4ab/nrp1a/si:dkey-49n23.1/spns2/reck/amotl2a/rap2c/cnn2/rtn4a/tek	18
GO:0048881	GO:0048881	mechanosensory lateral line system development	10/466	87/18569	6.3992e-05	0.00125449	0.00095994	adarb1a/edn1/snai1b/wnk1b/adgrg6/ackr3b/lpar2b/socs3a/yap1/rtn4a	10
GO:0003401	GO:0003401	axis elongation	8/466	55/18569	6.40648e-05	0.00125449	0.00095994	fn1a/dcn/zeb2b/zeb2a/gpc4/cthrc1a/akap12b/hdac1	8
GO:0010975	GO:0010975	regulation of neuron projection development	14/466	163/18569	6.47367e-05	0.00125485	0.000960209	ntrk3a/sema3aa/sema3gb/tiam1a/slit2/epha4a/slit3/kctd12.2/socs3a/dip2ba/sema4ab/nrp1a/si:dkey-49n23.1/clec14a	14
GO:0048882	GO:0048882	lateral line development	12/466	124/18569	6.79566e-05	0.00130409	0.000997889	adarb1a/wnt11/edn1/snai1b/wnk1b/gpc4/ackr3b/lpar2b/socs3a/yap1/fzd7b/rtn4a	12
GO:0048812	GO:0048812	neuron projection morphogenesis	28/466	500/18569	6.98639e-05	0.00132741	0.00101574	cntn3a.1/ephb2b/elavl4/sema3aa/sema3gb/unc5b/efnb3b/myo10l1/robo1/tiam1a/slit2/epha4a/efna3b/slit3/kctd12.2/dip2ba/efnb3a/epha7/sema4ab/nrp1a/si:dkey-49n23.1/efna1b/nckap1/notch1b/vaspb/rtn4a/cyfip1/clec14a	28
GO:0016055	GO:0016055	Wnt signaling pathway	19/466	275/18569	7.12848e-05	0.00134113	0.00102624	wnt9b/rspo2/wnt11/sfrp5/fzd5/btk/bambib/ndrg2/ccnyl1/tmem88a/grb10a/fzd4/rab8b/jun/reck/amotl2a/fzd7b/wls/hdac1	19
GO:0042327	GO:0042327	positive regulation of phosphorylation	14/466	165/18569	7.39048e-05	0.00137581	0.00105277	fgf5/ntrk3a/ek1/il34/fgfr2/epha4a/pdgfra/insra/mob3c/fgfr4/aplnra/wdfy2/tie1/tek	14
GO:0030334	GO:0030334	regulation of cell migration	17/466	230/18569	7.45617e-05	0.00137581	0.00105277	fgf5/sema3aa/sema3gb/arhgap4a/gpc4/stk10/ccn1/sema4ab/nrp1a/si:dkey-49n23.1/spns2/reck/amotl2a/rap2c/cnn2/rtn4a/tek	17
GO:0010721	GO:0010721	negative regulation of cell development	9/466	72/18569	7.65803e-05	0.0013996	0.00107097	sema3aa/sema3gb/slit2/epha4a/slit3/dip2ba/sema4ab/si:dkey-49n23.1/sirt2	9
GO:0198738	GO:0198738	cell-cell signaling by wnt	19/466	277/18569	7.85004e-05	0.00141865	0.00108555	wnt9b/rspo2/wnt11/sfrp5/fzd5/btk/bambib/ndrg2/ccnyl1/tmem88a/grb10a/fzd4/rab8b/jun/reck/amotl2a/fzd7b/wls/hdac1	19
GO:0032535	GO:0032535	regulation of cellular component size	16/466	209/18569	7.98405e-05	0.00141865	0.00108555	myo3b/vill/sema3aa/sema3gb/ssh1a/slit2/epha4a/slit3/dip2ba/slc12a7b/add3a/sema4ab/si:dkey-49n23.1/vaspb/svild/cyfip1	16
GO:0048706	GO:0048706	embryonic skeletal system development	16/466	209/18569	7.98405e-05	0.00141865	0.00108555	adarb1a/hand2/wnt11/fn1a/edn1/bmp3/cyp26b1/ece1/meis1b/sphk2/pdgfra/spns2/plcb3/wls/hdac1/kdm6a	16
GO:0035050	GO:0035050	embryonic heart tube development	15/466	188/18569	8.33619e-05	0.0014362	0.00109898	gata5/tnnt2a/hand2/wnt11/fn1a/tbx20/gata4/has2/ppp2r3a/meis1b/zfpm1/pdgfra/bmpr1aa/spns2/tal1	15
GO:0051129	GO:0051129	negative regulation of cellular component organization	15/466	188/18569	8.33619e-05	0.0014362	0.00109898	vill/sema3aa/sema3gb/ssh1a/slit2/epha4a/slit3/socs3a/dip2ba/add3a/sema4ab/si:dkey-49n23.1/lgals3b/svild/vat1	15
GO:0050767	GO:0050767	regulation of neurogenesis	14/466	167/18569	8.4184e-05	0.0014362	0.00109898	hapln1b/sema3aa/sema3gb/tiam1a/slit2/epha4a/slit3/dip2ba/serpinf1/sema4ab/si:dkey-49n23.1/sirt2/hdac1/clec14a	14
GO:0048667	GO:0048667	cell morphogenesis involved in neuron differentiation	27/466	479/18569	8.42224e-05	0.0014362	0.00109898	cntn3a.1/ephb2b/elavl4/sema3aa/sema3gb/unc5b/efnb3b/myo10l1/robo1/tiam1a/slit2/epha4a/efna3b/slit3/kctd12.2/dip2ba/efnb3a/epha7/sema4ab/nrp1a/si:dkey-49n23.1/efna1b/notch1b/vaspb/rtn4a/cyfip1/clec14a	27
GO:0048675	GO:0048675	axon extension	11/466	108/18569	8.53961e-05	0.0014362	0.00109898	sema3aa/sema3gb/myo10l1/slit2/epha4a/slit3/dip2ba/sema4ab/nrp1a/si:dkey-49n23.1/cyfip1	11
GO:0048738	GO:0048738	cardiac muscle tissue development	11/466	108/18569	8.53961e-05	0.0014362	0.00109898	gata5/nrg2a/tnnt2a/hand2/tbx20/gata4/icam3/tmem88a/aplnra/nr2f1a/nr2f2	11
GO:0060536	GO:0060536	cartilage morphogenesis	6/466	30/18569	8.60673e-05	0.0014362	0.00109898	edn1/cyp26b1/gpc4/chsy1/plcb3/wls	6
GO:0090130	GO:0090130	tissue migration	9/466	74/18569	9.51423e-05	0.00157395	0.00120439	cdh1/pcdh10a/fn1a/lpxn/nrp1a/rab13/reck/cnn2/tek	9
GO:0090092	GO:0090092	regulation of transmembrane receptor protein serine/threonine kinase signaling pathway	12/466	129/18569	9.9735e-05	0.00163583	0.00125174	sfrp5/has2/fstl1a/smad6a/smad9/bmp16/tgfbr3/bambib/fstl1b/skila/aplnra/tll1	12
GO:0014706	GO:0014706	striated muscle tissue development	11/466	110/18569	0.000100908	0.00164103	0.00125572	gata5/nrg2a/tnnt2a/hand2/tbx20/gata4/icam3/tmem88a/aplnra/nr2f1a/nr2f2	11
GO:0048704	GO:0048704	embryonic skeletal system morphogenesis	15/466	192/18569	0.00010565	0.00170372	0.00130369	adarb1a/hand2/wnt11/fn1a/edn1/bmp3/cyp26b1/ece1/meis1b/sphk2/pdgfra/spns2/plcb3/wls/kdm6a	15
GO:0048703	GO:0048703	embryonic viscerocranium morphogenesis	11/466	111/18569	0.000109525	0.00175149	0.00134024	hand2/wnt11/fn1a/edn1/ece1/meis1b/sphk2/spns2/plcb3/wls/kdm6a	11
GO:0048844	GO:0048844	artery morphogenesis	5/466	20/18569	0.00011057	0.00175359	0.00134185	sema3aa/meis1b/calcrla/tal1/amotl2a	5
GO:0051960	GO:0051960	regulation of nervous system development	15/466	193/18569	0.000111974	0.00176129	0.00134774	hapln1b/gbx2/sema3aa/sema3gb/tiam1a/slit2/epha4a/slit3/dip2ba/serpinf1/sema4ab/si:dkey-49n23.1/sirt2/hdac1/clec14a	15
GO:0009799	GO:0009799	specification of symmetry	21/466	335/18569	0.000121119	0.00187441	0.0014343	tnnt2a/hand2/wnt11/fn1a/tbx20/gata4/has2/foxc1b/ppp2r3a/bmpr1ab/fgfr2/meis1b/zfpm1/dld/bmpr1aa/yap1/sesn1/flna/aplnra/tll1/hdac1	21
GO:0009855	GO:0009855	determination of bilateral symmetry	21/466	335/18569	0.000121119	0.00187441	0.0014343	tnnt2a/hand2/wnt11/fn1a/tbx20/gata4/has2/foxc1b/ppp2r3a/bmpr1ab/fgfr2/meis1b/zfpm1/dld/bmpr1aa/yap1/sesn1/flna/aplnra/tll1/hdac1	21
GO:0055074	GO:0055074	calcium ion homeostasis	12/466	132/18569	0.000124359	0.00190916	0.0014609	tnnt2a/slc24a3/edn1/homer1b/plcd1a/atp2a3/edn2/fhl1b/mcu/plcb3/aplnra/smdt1b	12
GO:0048593	GO:0048593	camera-type eye morphogenesis	15/466	195/18569	0.000125617	0.00191317	0.00146396	sfrp5/fn1a/cdh4/pax2a/foxc1b/meis1b/epha4a/cpamd8/chsy1/sox11b/socs3a/cdh6/gmds/ccnd1/hdac1	15
GO:0060972	GO:0060972	left/right pattern formation	20/466	315/18569	0.000147381	0.00222696	0.00170407	gata5/tnnt2a/hand2/wnt11/fn1a/tbx20/gata4/has2/foxc1b/ppp2r3a/bmpr1ab/fgfr2/meis1b/zfpm1/dld/bmpr1aa/yap1/sesn1/flna/aplnra	20
GO:0040012	GO:0040012	regulation of locomotion	18/466	267/18569	0.000149496	0.00224128	0.00171503	fgf5/mylka/sema3aa/sema3gb/arhgap4a/gpc4/stk10/ccn1/sema4ab/nrp1a/si:dkey-49n23.1/spns2/reck/amotl2a/rap2c/cnn2/rtn4a/tek	18
GO:0060215	GO:0060215	primitive hemopoiesis	8/466	62/18569	0.000152633	0.00227057	0.00173744	trim2a/drll.3/meis1b/lpar1/kdm6bb/tspo/tal1/tmem88a	8
GO:0003313	GO:0003313	heart rudiment development	4/466	12/18569	0.000165144	0.00241306	0.00184647	fn1a/tbx20/pdgfra/spns2	4
GO:0010562	GO:0010562	positive regulation of phosphorus metabolic process	14/466	178/18569	0.000165984	0.00241306	0.00184647	fgf5/ntrk3a/ek1/il34/fgfr2/epha4a/pdgfra/insra/mob3c/fgfr4/aplnra/wdfy2/tie1/tek	14
GO:0045937	GO:0045937	positive regulation of phosphate metabolic process	14/466	178/18569	0.000165984	0.00241306	0.00184647	fgf5/ntrk3a/ek1/il34/fgfr2/epha4a/pdgfra/insra/mob3c/fgfr4/aplnra/wdfy2/tie1/tek	14
GO:0010631	GO:0010631	epithelial cell migration	8/466	63/18569	0.000171054	0.00246806	0.00188856	pcdh10a/fn1a/lpxn/nrp1a/rab13/reck/cnn2/tek	8
GO:0003143	GO:0003143	embryonic heart tube morphogenesis	13/466	158/18569	0.000180503	0.00258496	0.00197802	gata5/tnnt2a/hand2/wnt11/fn1a/tbx20/gata4/has2/ppp2r3a/meis1b/zfpm1/bmpr1aa/spns2	13
GO:1990138	GO:1990138	neuron projection extension	11/466	118/18569	0.000189314	0.00269106	0.0020592	sema3aa/sema3gb/myo10l1/slit2/epha4a/slit3/dip2ba/sema4ab/nrp1a/si:dkey-49n23.1/cyfip1	11
GO:0050878	GO:0050878	regulation of body fluid levels	9/466	81/18569	0.00019241	0.00271497	0.0020775	f8/f5/mylka/prkcbb/has2/vwf/f2r/thbd/f13a1b	9
GO:0016049	GO:0016049	cell growth	13/466	160/18569	0.000204505	0.00285587	0.00218532	sema3aa/sema3gb/myo10l1/wfdc1/slit2/gpc4/epha4a/slit3/dip2ba/sema4ab/nrp1a/si:dkey-49n23.1/cyfip1	13
GO:0051241	GO:0051241	negative regulation of multicellular organismal process	15/466	204/18569	0.000206478	0.00285587	0.00218532	sema3aa/sema3gb/unc5b/slit2/epha4a/adrb2a/slit3/dip2ba/lgals9l3/lgals9l1/serpine1/serpinf1/sema4ab/si:dkey-49n23.1/sirt2	15
GO:0043542	GO:0043542	endothelial cell migration	7/466	49/18569	0.000206861	0.00285587	0.00218532	fn1a/lpxn/nrp1a/rab13/reck/cnn2/tek	7
GO:0030516	GO:0030516	regulation of axon extension	8/466	65/18569	0.000213395	0.00292504	0.00223824	sema3aa/sema3gb/slit2/epha4a/slit3/dip2ba/sema4ab/si:dkey-49n23.1	8
GO:0006874	GO:0006874	intracellular calcium ion homeostasis	11/466	120/18569	0.000219595	0.00298868	0.00228694	tnnt2a/slc24a3/edn1/homer1b/plcd1a/atp2a3/edn2/mcu/plcb3/aplnra/smdt1b	11
GO:1904888	GO:1904888	cranial skeletal system development	17/466	252/18569	0.000224829	0.00303836	0.00232496	adarb1a/rspo2/hand2/wnt11/fn1a/edn1/bmp3/cyp26b1/ece1/meis1b/sphk2/pdgfra/spns2/plcb3/nr2f2/wls/kdm6a	17
GO:0007599	GO:0007599	hemostasis	8/466	66/18569	0.000237583	0.00318826	0.00243966	f8/f5/mylka/prkcbb/vwf/f2r/thbd/f13a1b	8
GO:0048915	GO:0048915	posterior lateral line system development	9/466	84/18569	0.000254124	0.00338655	0.00259139	adarb1a/snai1b/wnk1b/adgrg6/ackr3b/lpar2b/socs3a/yap1/rtn4a	9
GO:0003158	GO:0003158	endothelium development	8/466	67/18569	0.000263971	0.00349352	0.00267324	fn1a/meis1b/tal1/fbn2b/nr2f2/tll1/marcksl1b/msna	8
GO:0007368	GO:0007368	determination of left/right symmetry	19/466	307/18569	0.000296233	0.00389363	0.00297941	tnnt2a/hand2/wnt11/fn1a/tbx20/gata4/has2/foxc1b/ppp2r3a/bmpr1ab/fgfr2/meis1b/zfpm1/dld/bmpr1aa/yap1/sesn1/flna/aplnra	19
GO:0050919	GO:0050919	negative chemotaxis	6/466	38/18569	0.000337704	0.00440853	0.00337341	sema3aa/sema3gb/slit2/slit3/sema4ab/si:dkey-49n23.1	6
GO:0043010	GO:0043010	camera-type eye development	26/466	495/18569	0.000343124	0.00444901	0.00340439	f8/sfrp5/fn1a/cdh4/wdr17/pax2a/foxc1b/fzd5/meis1b/epha4a/cpamd8/chsy1/sox11b/socs3a/cdh6/yap1/gmds/icn2/dnajb1b/ccnd1/fzd4/id2a/lmo4a/marcksl1b/rtn4a/hdac1	26
GO:0050673	GO:0050673	epithelial cell proliferation	8/466	70/18569	0.000357858	0.00460768	0.0035258	adora2aa/igf2b/jcada/aplnra/nr2f1a/amotl2a/tek/hdac1	8
GO:0001755	GO:0001755	neural crest cell migration	10/466	107/18569	0.000360163	0.00460768	0.0035258	nrg2a/fn1a/sema3aa/sema3gb/foxc1b/zeb2b/pdgfra/sema4ab/nrp1a/si:dkey-49n23.1	10
GO:0048638	GO:0048638	regulation of developmental growth	10/466	108/18569	0.0003882	0.00493349	0.00377511	tbx20/sema3aa/sema3gb/slit2/epha4a/slit3/dip2ba/sema4ab/yap1/si:dkey-49n23.1	10
GO:0007492	GO:0007492	endoderm development	8/466	71/18569	0.000394601	0.00494928	0.00378719	gata5/cdh1/fn1a/ccn2a/yap1/acvr1ba/aplnra/msna	8
GO:0048916	GO:0048916	posterior lateral line development	8/466	71/18569	0.000394601	0.00494928	0.00378719	adarb1a/snai1b/wnk1b/ackr3b/lpar2b/socs3a/yap1/rtn4a	8
GO:0045165	GO:0045165	cell fate commitment	14/466	194/18569	0.000402879	0.00502029	0.00384153	gata5/wnt9b/wnt11/tbx20/gata4/gata6/pax2a/bmpr1ab/sox5/dld/bmpr1aa/acvr1ba/tmem88a/nr2f2	14
GO:0090497	GO:0090497	mesenchymal cell migration	10/466	109/18569	0.000418031	0.00517549	0.00396029	nrg2a/fn1a/sema3aa/sema3gb/foxc1b/zeb2b/pdgfra/sema4ab/nrp1a/si:dkey-49n23.1	10
GO:0060041	GO:0060041	retina development in camera-type eye	18/466	291/18569	0.00042682	0.00525044	0.00401764	f8/sfrp5/cdh4/pax2a/foxc1b/meis1b/chsy1/sox11b/socs3a/cdh6/yap1/gmds/icn2/ccnd1/fzd4/id2a/marcksl1b/hdac1	18
GO:0042325	GO:0042325	regulation of phosphorylation	17/466	268/18569	0.000459435	0.00561564	0.00429709	fgf5/ntrk3a/ek1/il34/fgfr2/epha4a/pdgfra/insra/mob3c/ccnyl1/fgfr4/ccnd1/aplnra/spry2/wdfy2/tie1/tek	17
GO:0051094	GO:0051094	positive regulation of developmental process	17/466	269/18569	0.000479361	0.00582211	0.00445508	hapln1b/edn1/il34/tiam1a/meis1b/ccn2a/sox5/ccn1/serpinf1/tal1/aplnra/wdfy2/tie1/elmo1/tek/hdac1/clec14a	17
GO:0033674	GO:0033674	positive regulation of kinase activity	9/466	92/18569	0.000502812	0.00606853	0.00464365	ntrk3a/ek1/fgfr2/epha4a/pdgfra/insra/fgfr4/tie1/tek	9
GO:1901532	GO:1901532	regulation of hematopoietic progenitor cell differentiation	6/466	41/18569	0.000516202	0.00619119	0.00473751	f2r/fgfr2/pdgfra/dld/fgfr4/gpr182	6
GO:0030510	GO:0030510	regulation of BMP signaling pathway	9/466	93/18569	0.000544572	0.00649089	0.00496684	sfrp5/has2/fstl1a/smad6a/smad9/bmp16/fstl1b/skila/tll1	9
GO:0051489	GO:0051489	regulation of filopodium assembly	4/466	16/18569	0.000560621	0.0066002	0.00505048	myo3b/gpm6ab/nrp1a/selenow2a	4
GO:0060030	GO:0060030	dorsal convergence	4/466	16/18569	0.000560621	0.0066002	0.00505048	has2/zeb2b/zeb2a/gpc4	4
GO:0001837	GO:0001837	epithelial to mesenchymal transition	6/466	42/18569	0.00058964	0.00689951	0.00527951	ek1/zeb2b/zeb2a/parp3/tgfbr3/snai1a	6
GO:0048588	GO:0048588	developmental cell growth	11/466	135/18569	0.000605582	0.00704311	0.00538939	sema3aa/sema3gb/myo10l1/slit2/epha4a/slit3/dip2ba/sema4ab/nrp1a/si:dkey-49n23.1/cyfip1	11
GO:0050801	GO:0050801	monoatomic ion homeostasis	17/466	276/18569	0.000640867	0.00740857	0.00566905	tnnt2a/slc24a3/edn1/homer1b/plcd1a/atp2a3/edn2/slc9a1b/wnk1b/fhl1b/slc12a7b/calcrla/mcu/fth1a/plcb3/aplnra/smdt1b	17
GO:0048878	GO:0048878	chemical homeostasis	22/466	407/18569	0.000660542	0.0075903	0.00580811	tnnt2a/slc24a3/edn1/homer1b/plcd1a/atp2a3/has2/edn2/slc9a1b/wnk1b/fhl1b/insra/slc12a7b/calcrla/mcu/yap1/fth1a/plcb3/aplnra/lipf/smdt1b/pla2g12b	22
GO:0060284	GO:0060284	regulation of cell development	17/466	277/18569	0.000667373	0.00762315	0.00583324	hapln1b/cdh4/sema3aa/il34/sema3gb/tiam1a/slit2/epha4a/slit3/dip2ba/serpinf1/sema4ab/si:dkey-49n23.1/reck/sirt2/hdac1/clec14a	17
GO:0051347	GO:0051347	positive regulation of transferase activity	9/466	96/18569	0.000687216	0.00780335	0.00597114	ntrk3a/ek1/fgfr2/epha4a/pdgfra/insra/fgfr4/tie1/tek	9
GO:0046847	GO:0046847	filopodium assembly	5/466	29/18569	0.000703115	0.00793693	0.00607335	myo3b/gpm6ab/nrp1a/amotl2a/selenow2a	5
GO:0030878	GO:0030878	thyroid gland development	4/466	17/18569	0.000718669	0.00806506	0.0061714	gata5/hand2/pax2a/tal1	4
GO:0040008	GO:0040008	regulation of growth	11/466	138/18569	0.000728064	0.008123	0.00621573	tbx20/sema3aa/sema3gb/wfdc1/slit2/epha4a/slit3/dip2ba/sema4ab/yap1/si:dkey-49n23.1	11
GO:0043085	GO:0043085	positive regulation of catalytic activity	18/466	306/18569	0.000768888	0.00852888	0.00652631	ntrk3a/ek1/edn1/hdr/edn2/tiam1a/sgsm3/fgfr2/rapgef5a/epha4a/ctsk/pdgfra/insra/si:ch211-266k8.4/gramd4b/fgfr4/tie1/tek	18
GO:0021545	GO:0021545	cranial nerve development	7/466	61/18569	0.000811506	0.00891435	0.00682127	fgf5/cdh4/adgrg6/slit2/cdh6/gmds/rtn4a	7
GO:0061387	GO:0061387	regulation of extent of cell growth	8/466	79/18569	0.000812929	0.00891435	0.00682127	sema3aa/sema3gb/slit2/epha4a/slit3/dip2ba/sema4ab/si:dkey-49n23.1	8
GO:0003206	GO:0003206	cardiac chamber morphogenesis	5/466	30/18569	0.000826525	0.00901194	0.00689595	nrg2a/tnnt2a/gata4/adgrg6/nr2f1a	5
GO:0050790	GO:0050790	regulation of catalytic activity	25/466	498/18569	0.000851899	0.00923613	0.00706749	ntrk3a/ek1/edn1/hdr/edn2/tiam1a/sgsm3/fgfr2/rapgef5a/epha4a/ctsk/pdgfra/insra/si:ch211-266k8.4/serpine1/serpinf1/gramd4b/ccnyl1/fgfr4/ccnd1/spry2/reck/serpinh1b/tie1/tek	25
GO:0090596	GO:0090596	sensory organ morphogenesis	19/466	335/18569	0.00085955	0.00926672	0.0070909	mfap5/rab11fip4a/sfrp5/fn1a/cdh4/pax2a/foxc1b/adgrg6/meis1b/epha4a/cpamd8/chsy1/sox11b/socs3a/cdh6/gmds/ccnd1/id2a/hdac1	19
GO:0060070	GO:0060070	canonical Wnt signaling pathway	13/466	186/18569	0.000865542	0.0092792	0.00710045	wnt9b/wnt11/sfrp5/fzd5/btk/bambib/ccnyl1/tmem88a/fzd4/rab8b/jun/reck/fzd7b	13
GO:0007189	GO:0007189	adenylate cyclase-activating G protein-coupled receptor signaling pathway	11/466	141/18569	0.000870459	0.00928006	0.00710112	mc1r/adgrl2a/adora2aa/adgrg6/adcy2b/lpar2b/lpar1/ptger2a/adrb2a/calcrla/adgre10	11
GO:0061026	GO:0061026	cardiac muscle tissue regeneration	4/466	18/18569	0.000905805	0.00958982	0.00733814	hapln1b/gata4/fosab/mdka	4
GO:0006816	GO:0006816	calcium ion transport	13/466	187/18569	0.000909509	0.00958982	0.00733814	trpv4/slc24a3/homer1b/plcd1a/atp2a3/cacna2d2a/p2rx1/mcu/lgals3b/plcb3/aplnra/ramp2/smdt1b	13
GO:0001558	GO:0001558	regulation of cell growth	9/466	100/18569	0.00092344	0.0096835	0.00740983	sema3aa/sema3gb/wfdc1/slit2/epha4a/slit3/dip2ba/sema4ab/si:dkey-49n23.1	9
GO:0014033	GO:0014033	neural crest cell differentiation	12/466	165/18569	0.000958417	0.00992958	0.00759812	adarb1a/nrg2a/fn1a/edn1/sema3aa/sema3gb/foxc1b/zeb2b/pdgfra/sema4ab/nrp1a/si:dkey-49n23.1	12
GO:0051050	GO:0051050	positive regulation of transport	8/466	81/18569	0.000959599	0.00992958	0.00759812	edn1/wnk1b/mcu/lgals3b/aplnra/oaz1a/msna/flot1b	8
GO:0001763	GO:0001763	morphogenesis of a branching structure	5/466	31/18569	0.00096538	0.00992958	0.00759812	tnnt2a/sema3aa/unc5b/slit2/spns2	5
GO:0001935	GO:0001935	endothelial cell proliferation	6/466	46/18569	0.000967603	0.00992958	0.00759812	igf2b/jcada/aplnra/nr2f1a/amotl2a/tek	6
GO:0098771	GO:0098771	inorganic ion homeostasis	15/466	238/18569	0.0010405	0.0106209	0.00812711	tnnt2a/slc24a3/edn1/homer1b/plcd1a/atp2a3/edn2/fhl1b/slc12a7b/calcrla/mcu/fth1a/plcb3/aplnra/smdt1b	15
GO:0001503	GO:0001503	ossification	9/466	102/18569	0.00106413	0.0107477	0.00822416	bmp3/tgfb3/cyp26b1/adgrg6/gpc4/ecm1b/rps6ka3b/alpl/wls	9
GO:0008361	GO:0008361	regulation of cell size	9/466	102/18569	0.00106413	0.0107477	0.00822416	sema3aa/sema3gb/slit2/epha4a/slit3/dip2ba/slc12a7b/sema4ab/si:dkey-49n23.1	9
GO:0008038	GO:0008038	neuron recognition	5/466	32/18569	0.00112084	0.0110125	0.00842675	cntn3a.1/ek1/robo1/slit2/nrp1a	5
GO:0045766	GO:0045766	positive regulation of angiogenesis	5/466	32/18569	0.00112084	0.0110125	0.00842675	meis1b/aplnra/tie1/elmo1/tek	5
GO:0062197	GO:0062197	cellular response to chemical stress	5/466	32/18569	0.00112084	0.0110125	0.00842675	mb/trpv4/nfe2l2a/gsr/sirt2	5
GO:1902036	GO:1902036	regulation of hematopoietic stem cell differentiation	5/466	32/18569	0.00112084	0.0110125	0.00842675	f2r/fgfr2/dld/fgfr4/gpr182	5
GO:0021593	GO:0021593	rhombomere morphogenesis	4/466	19/18569	0.00112478	0.0110125	0.00842675	efnb3b/cyp26b1/epha4a/notch1b	4
GO:0060841	GO:0060841	venous blood vessel development	4/466	19/18569	0.00112478	0.0110125	0.00842675	tnnt2a/meis1b/spry2/nr2f2	4
GO:0007422	GO:0007422	peripheral nervous system development	7/466	65/18569	0.0011885	0.0115188	0.00881423	nrg2a/pax2a/adgrg6/cdh6/notch1b/rtn4a/hdac1	7
GO:0007596	GO:0007596	blood coagulation	7/466	65/18569	0.0011885	0.0115188	0.00881423	f8/mylka/prkcbb/vwf/f2r/thbd/f13a1b	7
GO:0014032	GO:0014032	neural crest cell development	11/466	147/18569	0.00122482	0.0117522	0.00899276	adarb1a/nrg2a/fn1a/sema3aa/sema3gb/foxc1b/zeb2b/pdgfra/sema4ab/nrp1a/si:dkey-49n23.1	11
GO:0048864	GO:0048864	stem cell development	11/466	147/18569	0.00122482	0.0117522	0.00899276	adarb1a/nrg2a/fn1a/sema3aa/sema3gb/foxc1b/zeb2b/pdgfra/sema4ab/nrp1a/si:dkey-49n23.1	11
GO:0043549	GO:0043549	regulation of kinase activity	12/466	170/18569	0.00124131	0.0118511	0.00906846	ntrk3a/ek1/fgfr2/epha4a/pdgfra/insra/ccnyl1/fgfr4/ccnd1/spry2/tie1/tek	12
GO:1904018	GO:1904018	positive regulation of vasculature development	5/466	33/18569	0.00129409	0.0122939	0.00940729	meis1b/aplnra/tie1/elmo1/tek	5
GO:0010594	GO:0010594	regulation of endothelial cell migration	4/466	20/18569	0.00137833	0.0130296	0.00997027	nrp1a/reck/cnn2/tek	4
GO:0002011	GO:0002011	morphogenesis of an epithelial sheet	9/466	107/18569	0.00149283	0.0140428	0.0107456	cdh1/sfrp5/pax2a/cthrc1a/sdc2/sox11b/aplnra/rhoca/fzd7b	9
GO:0001946	GO:0001946	lymphangiogenesis	6/466	50/18569	0.00150886	0.0141244	0.010808	nfatc1/lpar1/itga9/nr2f2/notch1b/elmo1	6
GO:0060042	GO:0060042	retina morphogenesis in camera-type eye	10/466	129/18569	0.00154853	0.0143876	0.0110094	sfrp5/cdh4/foxc1b/meis1b/chsy1/sox11b/socs3a/cdh6/gmds/hdac1	10
GO:0050817	GO:0050817	coagulation	7/466	68/18569	0.00155197	0.0143876	0.0110094	f8/mylka/prkcbb/vwf/f2r/thbd/f13a1b	7
GO:0000122	GO:0000122	negative regulation of transcription by RNA polymerase II	15/466	248/18569	0.00156701	0.0144572	0.0110627	gata5/id2b/gata4/gata6/zeb2b/mycb/sox11b/dnajb1b/ccnd1/skila/id2a/nr2f1a/nr2f2/sirt2/hdac1	15
GO:0030859	GO:0030859	polarized epithelial cell differentiation	3/466	10/18569	0.00165219	0.0150978	0.0115529	hand2/fn1a/myh11a	3
GO:0055010	GO:0055010	ventricular cardiac muscle tissue morphogenesis	3/466	10/18569	0.00165219	0.0150978	0.0115529	nrg2a/tnnt2a/gata4	3
GO:0021546	GO:0021546	rhombomere development	4/466	21/18569	0.00166919	0.0151569	0.011598	efnb3b/cyp26b1/epha4a/notch1b	4
GO:0045446	GO:0045446	endothelial cell differentiation	6/466	51/18569	0.00167444	0.0151569	0.011598	fn1a/meis1b/tal1/fbn2b/nr2f2/tll1	6
GO:0030855	GO:0030855	epithelial cell differentiation	16/466	276/18569	0.00171838	0.0154815	0.0118465	hand2/fn1a/gata6/pax2a/errfi1a/meis1b/myh11a/socs3a/bhmt/tal1/krt8/fbn2b/id2a/nr2f2/tll1/rtn4a	16
GO:0008015	GO:0008015	blood circulation	16/466	277/18569	0.00178281	0.0159869	0.0122332	tnnt2a/hand2/edn1/edn2/foxc1b/adgrl2a/adora2aa/urp1/myh11a/adrb2a/mcu/icam3/plcb3/cbfb/junba/ccdc80	16
GO:0019220	GO:0019220	regulation of phosphate metabolic process	17/466	304/18569	0.00183516	0.0162603	0.0124424	fgf5/ntrk3a/ek1/il34/fgfr2/epha4a/pdgfra/insra/mob3c/ccnyl1/fgfr4/ccnd1/aplnra/spry2/wdfy2/tie1/tek	17
GO:0051174	GO:0051174	regulation of phosphorus metabolic process	17/466	304/18569	0.00183516	0.0162603	0.0124424	fgf5/ntrk3a/ek1/il34/fgfr2/epha4a/pdgfra/insra/mob3c/ccnyl1/fgfr4/ccnd1/aplnra/spry2/wdfy2/tie1/tek	17
GO:0016331	GO:0016331	morphogenesis of embryonic epithelium	7/466	70/18569	0.00183871	0.0162603	0.0124424	hand2/cdh1/sfrp5/pax2a/sox11b/mdka/vaspb	7
GO:0036303	GO:0036303	lymph vessel morphogenesis	6/466	52/18569	0.00185346	0.0163155	0.0124846	nfatc1/lpar1/itga9/nr2f2/notch1b/elmo1	6
GO:0045597	GO:0045597	positive regulation of cell differentiation	12/466	179/18569	0.00192402	0.0167827	0.0128422	hapln1b/edn1/il34/tiam1a/ccn2a/sox5/ccn1/serpinf1/tal1/wdfy2/hdac1/clec14a	12
GO:0051338	GO:0051338	regulation of transferase activity	12/466	179/18569	0.00192402	0.0167827	0.0128422	ntrk3a/ek1/fgfr2/epha4a/pdgfra/insra/ccnyl1/fgfr4/ccnd1/spry2/tie1/tek	12
GO:0009968	GO:0009968	negative regulation of signal transduction	22/466	443/18569	0.00195509	0.0169766	0.0129905	errfi1a/adgrl2a/fzd5/cyp26b1/zeb2a/smad6a/btk/sox11b/socs3a/dld/bambib/gramd4b/sesn1/lgals3b/akap12b/skila/tmem88a/grb10a/aplnra/spry2/sesn3/grinab	22
GO:0061053	GO:0061053	somite development	11/466	157/18569	0.00207387	0.0179269	0.0137177	fn1a/has2/zeb2b/zeb2a/igf2b/epha4a/calcrla/dld/tgfbr3/rtn4a/ccdc80	11
GO:0003170	GO:0003170	heart valve development	5/466	37/18569	0.0021893	0.0187661	0.0143599	trpv4/has2/nfatc1/yap1/fbn2b	5
GO:0003013	GO:0003013	circulatory system process	16/466	283/18569	0.00221338	0.0187661	0.0143599	tnnt2a/hand2/edn1/edn2/foxc1b/adgrl2a/adora2aa/urp1/myh11a/adrb2a/mcu/icam3/plcb3/cbfb/junba/ccdc80	16
GO:0003229	GO:0003229	ventricular cardiac muscle tissue development	3/466	11/18569	0.00222964	0.0187661	0.0143599	nrg2a/tnnt2a/gata4	3
GO:0061383	GO:0061383	trabecula morphogenesis	3/466	11/18569	0.00222964	0.0187661	0.0143599	nrg2a/adgrg6/kdm6bb	3
GO:0061384	GO:0061384	heart trabecula morphogenesis	3/466	11/18569	0.00222964	0.0187661	0.0143599	nrg2a/adgrg6/kdm6bb	3
GO:1903035	GO:1903035	negative regulation of response to wounding	3/466	11/18569	0.00222964	0.0187661	0.0143599	epha4a/socs3a/serpine1	3
GO:0035148	GO:0035148	tube formation	7/466	73/18569	0.00234389	0.0196416	0.0150298	hand2/cdh1/pax2a/adgrg6/chsy1/mdka/vaspb	7
GO:0010632	GO:0010632	regulation of epithelial cell migration	4/466	23/18569	0.00237368	0.019719	0.015089	nrp1a/reck/cnn2/tek	4
GO:0071910	GO:0071910	determination of liver left/right asymmetry	4/466	23/18569	0.00237368	0.019719	0.015089	foxc1b/fgfr2/dld/aplnra	4
GO:0048546	GO:0048546	digestive tract morphogenesis	5/466	38/18569	0.00246985	0.0203115	0.0155424	gata5/sfrp5/tbx20/myh11a/dld	5
GO:0060349	GO:0060349	bone morphogenesis	5/466	38/18569	0.00246985	0.0203115	0.0155424	edn1/cyp26b1/gpc4/ctsk/wls	5
GO:0055080	GO:0055080	monoatomic cation homeostasis	15/466	260/18569	0.00247676	0.0203115	0.0155424	tnnt2a/slc24a3/edn1/homer1b/plcd1a/atp2a3/edn2/slc9a1b/fhl1b/slc12a7b/mcu/fth1a/plcb3/aplnra/smdt1b	15
GO:0006022	GO:0006022	aminoglycan metabolic process	7/466	74/18569	0.00253407	0.0206931	0.0158344	has2/has3/chst7/chsy1/lygl1/hyal2b/b3gnt7	7
GO:0030902	GO:0030902	hindbrain development	10/466	138/18569	0.00255245	0.0207549	0.0158817	has2/gbx2/pax2a/efnb3b/cyp26b1/epha4a/ca8/gmds/notch1b/hdac1	10
GO:0006029	GO:0006029	proteoglycan metabolic process	6/466	56/18569	0.00271776	0.0220059	0.0168389	hs6st3a/dcn/chst7/gpc4/hs6st1b/chsy1	6
GO:0003018	GO:0003018	vascular process in circulatory system	7/466	75/18569	0.00273589	0.0220596	0.01688	edn1/edn2/foxc1b/adgrl2a/urp1/adrb2a/plcb3	7
GO:2000736	GO:2000736	regulation of stem cell differentiation	5/466	39/18569	0.0027756	0.0221669	0.0169621	f2r/fgfr2/dld/fgfr4/gpr182	5
GO:0010648	GO:0010648	negative regulation of cell communication	22/466	456/18569	0.00278386	0.0221669	0.0169621	errfi1a/adgrl2a/fzd5/cyp26b1/zeb2a/smad6a/btk/sox11b/socs3a/dld/bambib/gramd4b/sesn1/lgals3b/akap12b/skila/tmem88a/grb10a/aplnra/spry2/sesn3/grinab	22
GO:0023057	GO:0023057	negative regulation of signaling	22/466	456/18569	0.00278386	0.0221669	0.0169621	errfi1a/adgrl2a/fzd5/cyp26b1/zeb2a/smad6a/btk/sox11b/socs3a/dld/bambib/gramd4b/sesn1/lgals3b/akap12b/skila/tmem88a/grb10a/aplnra/spry2/sesn3/grinab	22
GO:0021654	GO:0021654	rhombomere boundary formation	3/466	12/18569	0.0029178	0.0230422	0.0176319	efnb3b/epha4a/notch1b	3
GO:0050853	GO:0050853	B cell receptor signaling pathway	3/466	12/18569	0.0029178	0.0230422	0.0176319	prkcbb/si:ch211-214p13.9/btk	3
GO:0001666	GO:0001666	response to hypoxia	7/466	76/18569	0.00294982	0.0230907	0.017669	alas2/mb/egln1b/nrp1a/camk2g2/lipf/sirt2	7
GO:0040013	GO:0040013	negative regulation of locomotion	7/466	76/18569	0.00294982	0.0230907	0.017669	sema3aa/sema3gb/arhgap4a/sema4ab/si:dkey-49n23.1/rap2c/rtn4a	7
GO:0030203	GO:0030203	glycosaminoglycan metabolic process	6/466	57/18569	0.00297445	0.0230907	0.017669	has2/has3/chst7/chsy1/lygl1/hyal2b	6
GO:0055007	GO:0055007	cardiac muscle cell differentiation	6/466	57/18569	0.00297445	0.0230907	0.017669	gata5/hand2/icam3/tmem88a/nr2f1a/nr2f2	6
GO:0001947	GO:0001947	heart looping	10/466	141/18569	0.00298411	0.0230907	0.017669	tnnt2a/hand2/wnt11/tbx20/gata4/has2/ppp2r3a/meis1b/zfpm1/bmpr1aa	10
GO:0032101	GO:0032101	regulation of response to external stimulus	16/466	292/18569	0.00301943	0.0231319	0.0177006	f8/f5/sema3aa/sema3gb/f2r/epha4a/mapkapk3/socs3a/tlr5b/serpine1/gramd4b/sema4ab/si:dkey-34d22.1/nrp1a/mfge8b/si:dkey-49n23.1	16
GO:0006935	GO:0006935	chemotaxis	13/466	214/18569	0.00302559	0.0231319	0.0177006	ackr4b/sema3aa/sema3gb/slit2/ackr3b/pdgfra/slit3/sema4ab/nrp1a/si:dkey-49n23.1/rab13/lgals3b/yrk	13
GO:0042330	GO:0042330	taxis	13/466	214/18569	0.00302559	0.0231319	0.0177006	ackr4b/sema3aa/sema3gb/slit2/ackr3b/pdgfra/slit3/sema4ab/nrp1a/si:dkey-49n23.1/rab13/lgals3b/yrk	13
GO:0006023	GO:0006023	aminoglycan biosynthetic process	5/466	40/18569	0.00310781	0.0236663	0.0181094	has2/has3/chst7/chsy1/b3gnt7	5
GO:0036293	GO:0036293	response to decreased oxygen levels	7/466	77/18569	0.00317632	0.0240923	0.0184355	alas2/mb/egln1b/nrp1a/camk2g2/lipf/sirt2	7
GO:0021675	GO:0021675	nerve development	7/466	78/18569	0.00341586	0.0258072	0.0197477	fgf5/cdh4/adgrg6/slit2/cdh6/gmds/rtn4a	7
GO:0031589	GO:0031589	cell-substrate adhesion	9/466	121/18569	0.00346314	0.0259947	0.0198911	epdl2/ek1/fn1a/vwf/ccdc80l2/lpxn/itga9/ccdc80/itga6l	9
GO:1903510	GO:1903510	mucopolysaccharide metabolic process	5/466	41/18569	0.00346776	0.0259947	0.0198911	has2/has3/chst7/chsy1/hyal2b	5
GO:0009306	GO:0009306	protein secretion	6/466	59/18569	0.00354163	0.0261569	0.0200153	edn1/rab3da/mcu/rab13/rab8b/wls	6
GO:0035592	GO:0035592	establishment of protein localization to extracellular region	6/466	59/18569	0.00354163	0.0261569	0.0200153	edn1/rab3da/mcu/rab13/rab8b/wls	6
GO:0006873	GO:0006873	intracellular monoatomic ion homeostasis	13/466	218/18569	0.00354392	0.0261569	0.0200153	tnnt2a/slc24a3/edn1/homer1b/plcd1a/atp2a3/edn2/slc9a1b/mcu/fth1a/plcb3/aplnra/smdt1b	13
GO:0030003	GO:0030003	intracellular monoatomic cation homeostasis	13/466	218/18569	0.00354392	0.0261569	0.0200153	tnnt2a/slc24a3/edn1/homer1b/plcd1a/atp2a3/edn2/slc9a1b/mcu/fth1a/plcb3/aplnra/smdt1b	13
GO:0019725	GO:0019725	cellular homeostasis	16/466	298/18569	0.00368127	0.0270665	0.0207113	tnnt2a/slc24a3/edn1/homer1b/plcd1a/atp2a3/edn2/slc9a1b/slc12a7b/mcu/fth1a/plcb3/gsr/ccnd1/aplnra/smdt1b	16
GO:0001938	GO:0001938	positive regulation of endothelial cell proliferation	3/466	13/18569	0.003723	0.0272688	0.0208661	igf2b/jcada/aplnra	3
GO:0048857	GO:0048857	neural nucleus development	4/466	26/18569	0.00377675	0.0275573	0.0210869	pax2a/ackr3b/gmds/hdac1	4
GO:0071692	GO:0071692	protein localization to extracellular region	6/466	60/18569	0.00385359	0.0280115	0.0214345	edn1/rab3da/mcu/rab13/rab8b/wls	6
GO:0070482	GO:0070482	response to oxygen levels	7/466	80/18569	0.00393599	0.0285025	0.0218101	alas2/mb/egln1b/nrp1a/camk2g2/lipf/sirt2	7
GO:0044093	GO:0044093	positive regulation of molecular function	18/466	357/18569	0.00415132	0.0299488	0.0229169	ntrk3a/ek1/edn1/hdr/edn2/tiam1a/sgsm3/fgfr2/rapgef5a/epha4a/ctsk/pdgfra/insra/si:ch211-266k8.4/gramd4b/fgfr4/tie1/tek	18
GO:0006024	GO:0006024	glycosaminoglycan biosynthetic process	4/466	27/18569	0.00434695	0.0310104	0.0237292	has2/has3/chst7/chsy1	4
GO:0016525	GO:0016525	negative regulation of angiogenesis	4/466	27/18569	0.00434695	0.0310104	0.0237292	unc5b/serpine1/serpinf1/sirt2	4
GO:2000181	GO:2000181	negative regulation of blood vessel morphogenesis	4/466	27/18569	0.00434695	0.0310104	0.0237292	unc5b/serpine1/serpinf1/sirt2	4
GO:0001704	GO:0001704	formation of primary germ layer	7/466	82/18569	0.00451407	0.0319224	0.0244271	gata5/fn1a/lpar1/tal1/acvr1ba/aplnra/tll1	7
GO:0045892	GO:0045892	negative regulation of DNA-templated transcription	18/466	360/18569	0.0045247	0.0319224	0.0244271	gata5/id2b/tbx20/gata4/gata6/zeb2b/mycb/zeb2a/smad9/sox11b/dnajb1b/ccnd1/skila/id2a/nr2f1a/nr2f2/sirt2/hdac1	18
GO:1902679	GO:1902679	negative regulation of RNA biosynthetic process	18/466	360/18569	0.0045247	0.0319224	0.0244271	gata5/id2b/tbx20/gata4/gata6/zeb2b/mycb/zeb2a/smad9/sox11b/dnajb1b/ccnd1/skila/id2a/nr2f1a/nr2f2/sirt2/hdac1	18
GO:0003157	GO:0003157	endocardium development	3/466	14/18569	0.00465085	0.0323369	0.0247442	fn1a/tal1/fbn2b	3
GO:0021594	GO:0021594	rhombomere formation	3/466	14/18569	0.00465085	0.0323369	0.0247442	efnb3b/epha4a/notch1b	3
GO:0051222	GO:0051222	positive regulation of protein transport	3/466	14/18569	0.00465085	0.0323369	0.0247442	edn1/mcu/oaz1a	3
GO:0061548	GO:0061548	ganglion development	3/466	14/18569	0.00465085	0.0323369	0.0247442	fgf5/cdh6/reck	3
GO:0044331	GO:0044331	cell-cell adhesion mediated by cadherin	4/466	28/18569	0.00497244	0.0343241	0.0262649	cdh1/cdh4/cdh6/flot1b	4
GO:1901343	GO:1901343	negative regulation of vasculature development	4/466	28/18569	0.00497244	0.0343241	0.0262649	unc5b/serpine1/serpinf1/sirt2	4
GO:0061061	GO:0061061	muscle structure development	20/466	422/18569	0.00516065	0.0354957	0.0271613	gata5/nrg2a/tnnt2a/hand2/homer1b/plod2/gata4/ppp2r3a/gpc4/igf2b/fhl1b/pdlim1/myl9b/icam3/actn1/akap12b/cbfb/tmem88a/nr2f1a/nr2f2	20
GO:0001702	GO:0001702	gastrulation with mouth forming second	6/466	64/18569	0.00530791	0.0363781	0.0278366	cdh1/drl/gpc4/cthrc1a/sdc2/aplnra	6
GO:0051049	GO:0051049	regulation of transport	22/466	483/18569	0.00547392	0.0373824	0.0286051	kcnh4b/edn1/homer1b/dpp6b/cacna2d2a/kcng2/wnk1b/rab3da/map2k1/nkain4/doc2b/clic2/mcu/rab13/slc38a2/lgals3b/plcb3/rab8b/aplnra/oaz1a/msna/flot1b	22
GO:0120034	GO:0120034	positive regulation of plasma membrane bounded cell projection assembly	4/466	29/18569	0.00565553	0.0384857	0.0294493	myo3b/eps8a/nrp1a/selenow2a	4
GO:0008078	GO:0008078	mesodermal cell migration	3/466	15/18569	0.00570633	0.0385579	0.0295045	has2/snai1b/snai1a	3
GO:0035907	GO:0035907	dorsal aorta development	3/466	15/18569	0.00570633	0.0385579	0.0295045	meis1b/amotl2a/notch1b	3
GO:0030903	GO:0030903	notochord development	7/466	86/18569	0.00585978	0.0391393	0.0299495	plod2/fstl1a/gpc4/igf2b/ccn2a/fstl1b/fbn2b	7
GO:0048884	GO:0048884	neuromast development	7/466	86/18569	0.00585978	0.0391393	0.0299495	wnt11/edn1/wnk1b/gpc4/socs3a/fzd7b/rtn4a	7
GO:0030198	GO:0030198	extracellular matrix organization	11/466	180/18569	0.00587396	0.0391393	0.0299495	adamts6/plod2/has2/mmp11b/has3/ccdc80l2/gpc4/cpamd8/reck/serpinh1b/ccdc80	11
GO:0043062	GO:0043062	extracellular structure organization	11/466	180/18569	0.00587396	0.0391393	0.0299495	adamts6/plod2/has2/mmp11b/has3/ccdc80l2/gpc4/cpamd8/reck/serpinh1b/ccdc80	11
GO:0044087	GO:0044087	regulation of cellular component biogenesis	15/466	286/18569	0.00597962	0.0397055	0.0303827	myo3b/ek1/vill/ssh1a/eps8a/gpc4/gpm6ab/add3a/nrp1a/selenow2a/vaspb/svild/cyfip1/msna/flot1b	15
GO:0045229	GO:0045229	external encapsulating structure organization	11/466	181/18569	0.00611742	0.0404805	0.0309757	adamts6/plod2/has2/mmp11b/has3/ccdc80l2/gpc4/cpamd8/reck/serpinh1b/ccdc80	11
GO:0001756	GO:0001756	somitogenesis	8/466	109/18569	0.00618589	0.0407929	0.0312148	fn1a/has2/zeb2b/zeb2a/igf2b/calcrla/dld/ccdc80	8
GO:0031346	GO:0031346	positive regulation of cell projection organization	7/466	87/18569	0.00623861	0.0409996	0.0313729	ntrk3a/myo3b/tiam1a/eps8a/nrp1a/selenow2a/clec14a	7
GO:0030166	GO:0030166	proteoglycan biosynthetic process	5/466	47/18569	0.00627984	0.0411297	0.0314725	hs6st3a/chst7/gpc4/hs6st1b/chsy1	5
GO:0003073	GO:0003073	regulation of systemic arterial blood pressure	4/466	30/18569	0.00639845	0.0414818	0.031742	edn1/edn2/adrb2a/ccdc80	4
GO:0034599	GO:0034599	cellular response to oxidative stress	4/466	30/18569	0.00639845	0.0414818	0.031742	mb/nfe2l2a/gsr/sirt2	4
GO:0048843	GO:0048843	negative regulation of axon extension involved in axon guidance	4/466	30/18569	0.00639845	0.0414818	0.031742	sema3aa/sema3gb/sema4ab/si:dkey-49n23.1	4
GO:0030099	GO:0030099	myeloid cell differentiation	13/466	235/18569	0.00660823	0.0426976	0.0326723	alas2/gata5/trim2a/gata4/gata6/thpo/il34/meis1b/smad9/kdm6bb/tspo/tal1/tmem88a	13
GO:0008037	GO:0008037	cell recognition	6/466	67/18569	0.0066363	0.0427351	0.032701	cntn3a.1/ek1/robo1/slit2/epha4a/nrp1a	6
GO:0003205	GO:0003205	cardiac chamber development	5/466	48/18569	0.00686873	0.0436607	0.0334092	nrg2a/tnnt2a/gata4/adgrg6/nr2f1a	5
GO:0003159	GO:0003159	morphogenesis of an endothelium	3/466	16/18569	0.0068938	0.0436607	0.0334092	meis1b/marcksl1b/msna	3
GO:0048859	GO:0048859	formation of anatomical boundary	3/466	16/18569	0.0068938	0.0436607	0.0334092	efnb3b/epha4a/notch1b	3
GO:0061154	GO:0061154	endothelial tube morphogenesis	3/466	16/18569	0.0068938	0.0436607	0.0334092	meis1b/marcksl1b/msna	3
GO:0072554	GO:0072554	blood vessel lumenization	3/466	16/18569	0.0068938	0.0436607	0.0334092	meis1b/marcksl1b/msna	3
GO:0007498	GO:0007498	mesoderm development	8/466	112/18569	0.00725849	0.0458192	0.0350609	cdh1/quo/fgfr2/lpar1/dld/tal1/acvr1ba/tll1	8
GO:0060027	GO:0060027	convergent extension involved in gastrulation	7/466	90/18569	0.00748481	0.0470929	0.0360356	has2/zeb2b/zeb2a/gpc4/mcu/fzd7b/kdm6a	7
GO:0055082	GO:0055082	intracellular chemical homeostasis	13/466	240/18569	0.00782758	0.0490887	0.0375627	tnnt2a/slc24a3/edn1/homer1b/plcd1a/atp2a3/edn2/slc9a1b/mcu/fth1a/plcb3/aplnra/smdt1b	13
GO:0008217	GO:0008217	regulation of blood pressure	5/466	50/18569	0.00816032	0.0510087	0.0390319	edn1/edn2/urp1/adrb2a/ccdc80	5
GO:0001569	GO:0001569	branching involved in blood vessel morphogenesis	3/466	17/18569	0.00821704	0.0510307	0.0390488	tnnt2a/unc5b/spns2	3
GO:0008354	GO:0008354	germ cell migration	3/466	17/18569	0.00821704	0.0510307	0.0390488	cdh1/ackr3b/kdm6a	3
GO:0042692	GO:0042692	muscle cell differentiation	15/466	297/18569	0.00834083	0.0516324	0.0395092	gata5/tnnt2a/hand2/plod2/ppp2r3a/gpc4/igf2b/myl9b/icam3/actn1/akap12b/cbfb/tmem88a/nr2f1a/nr2f2	15
GO:0032102	GO:0032102	negative regulation of response to external stimulus	7/466	92/18569	0.00841207	0.051906	0.0397185	sema3aa/sema3gb/epha4a/socs3a/serpine1/sema4ab/si:dkey-49n23.1	7
GO:0008543	GO:0008543	fibroblast growth factor receptor signaling pathway	6/466	71/18569	0.00876242	0.0538945	0.0412401	fgf5/sall1a/fgfr2/zeb2a/fgfr4/spry2	6
GO:0070588	GO:0070588	calcium ion transmembrane transport	10/466	165/18569	0.00890698	0.0546086	0.0417866	trpv4/slc24a3/plcd1a/atp2a3/cacna2d2a/p2rx1/mcu/plcb3/aplnra/smdt1b	10
GO:0035113	GO:0035113	embryonic appendage morphogenesis	4/466	33/18569	0.0090072	0.0548724	0.0419885	hand2/sall1a/fibinb/tll1	4
GO:1903034	GO:1903034	regulation of response to wounding	4/466	33/18569	0.0090072	0.0548724	0.0419885	f2r/epha4a/socs3a/serpine1	4
GO:0033333	GO:0033333	fin development	8/466	117/18569	0.00935007	0.056497	0.0432316	rspo2/hand2/sall1a/fgfr2/slc43a2a/fibinb/chsy1/tll1	8
GO:0044344	GO:0044344	cellular response to fibroblast growth factor stimulus	6/466	72/18569	0.00936219	0.056497	0.0432316	fgf5/sall1a/fgfr2/zeb2a/fgfr4/spry2	6
GO:0071774	GO:0071774	response to fibroblast growth factor	6/466	72/18569	0.00936219	0.056497	0.0432316	fgf5/sall1a/fgfr2/zeb2a/fgfr4/spry2	6
GO:0030155	GO:0030155	regulation of cell adhesion	10/466	167/18569	0.00965019	0.0576849	0.0441406	ek1/snai1b/rhoua/f2r/ccdc80l2/igf2b/lgals9l3/lgals9l1/flot1b/ccdc80	10
GO:0030212	GO:0030212	hyaluronan metabolic process	3/466	18/18569	0.00967928	0.0576849	0.0441406	has2/has3/hyal2b	3
GO:0035904	GO:0035904	aorta development	3/466	18/18569	0.00967928	0.0576849	0.0441406	meis1b/amotl2a/notch1b	3
GO:0043114	GO:0043114	regulation of vascular permeability	3/466	18/18569	0.00967928	0.0576849	0.0441406	foxc1b/adgrl2a/plcb3	3
GO:0033339	GO:0033339	pectoral fin development	6/466	73/18569	0.0099907	0.0592875	0.0453669	rspo2/hand2/sall1a/fgfr2/fibinb/chsy1	6
GO:0006939	GO:0006939	smooth muscle contraction	4/466	34/18569	0.01001	0.0592875	0.0453669	edn1/edn2/adrb2a/flna	4
GO:0051253	GO:0051253	negative regulation of RNA metabolic process	18/466	393/18569	0.0107668	0.063574	0.0486469	gata5/id2b/tbx20/gata4/gata6/zeb2b/mycb/zeb2a/smad9/sox11b/dnajb1b/ccnd1/skila/id2a/nr2f1a/nr2f2/sirt2/hdac1	18
GO:0001838	GO:0001838	embryonic epithelial tube formation	4/466	35/18569	0.0110824	0.064828	0.0496065	hand2/cdh1/mdka/vaspb	4
GO:0050678	GO:0050678	regulation of epithelial cell proliferation	4/466	35/18569	0.0110824	0.064828	0.0496065	adora2aa/igf2b/jcada/aplnra	4
GO:0050922	GO:0050922	negative regulation of chemotaxis	4/466	35/18569	0.0110824	0.064828	0.0496065	sema3aa/sema3gb/sema4ab/si:dkey-49n23.1	4
GO:0003208	GO:0003208	cardiac ventricle morphogenesis	3/466	19/18569	0.0112833	0.064828	0.0496065	nrg2a/tnnt2a/gata4	3
GO:0006904	GO:0006904	vesicle docking involved in exocytosis	3/466	19/18569	0.0112833	0.064828	0.0496065	rab3da/rab13/rab8b	3
GO:0030856	GO:0030856	regulation of epithelial cell differentiation	3/466	19/18569	0.0112833	0.064828	0.0496065	errfi1a/myh11a/tal1	3
GO:0035469	GO:0035469	determination of pancreatic left/right asymmetry	3/466	19/18569	0.0112833	0.064828	0.0496065	foxc1b/fgfr2/dld	3
GO:0055008	GO:0055008	cardiac muscle tissue morphogenesis	3/466	19/18569	0.0112833	0.064828	0.0496065	nrg2a/tnnt2a/gata4	3
GO:0060350	GO:0060350	endochondral bone morphogenesis	3/466	19/18569	0.0112833	0.064828	0.0496065	edn1/gpc4/wls	3
GO:0010959	GO:0010959	regulation of metal ion transport	7/466	98/18569	0.0117006	0.0670252	0.0512877	homer1b/dpp6b/wnk1b/nkain4/lgals3b/plcb3/aplnra	7
GO:0006979	GO:0006979	response to oxidative stress	6/466	76/18569	0.0120556	0.0686488	0.0525302	mb/sesn1/nfe2l2a/gsr/sesn3/sirt2	6
GO:0019722	GO:0019722	calcium-mediated signaling	6/466	76/18569	0.0120556	0.0686488	0.0525302	mlnl/ackr4b/nfatc1/ackr3b/mcu/rcan1a	6
GO:0009952	GO:0009952	anterior/posterior pattern specification	13/466	255/18569	0.0125744	0.0713912	0.0546286	fn1a/has2/pax2a/zeb2b/zeb2a/igf2b/epha4a/btk/calcrla/dld/wls/hdac1/ccdc80	13
GO:0048736	GO:0048736	appendage development	8/466	124/18569	0.0129927	0.0733338	0.0561151	rspo2/hand2/sall1a/fgfr2/slc43a2a/fibinb/chsy1/tll1	8
GO:0001936	GO:0001936	regulation of endothelial cell proliferation	3/466	20/18569	0.0130312	0.0733338	0.0561151	igf2b/jcada/aplnra	3
GO:0003179	GO:0003179	heart valve morphogenesis	3/466	20/18569	0.0130312	0.0733338	0.0561151	has2/nfatc1/fbn2b	3
GO:0060037	GO:0060037	pharyngeal system development	4/466	37/18569	0.0134427	0.0754284	0.0577179	wnt9b/wnt11/fn1a/gpc4	4
GO:0031076	GO:0031076	embryonic camera-type eye development	5/466	57/18569	0.0139924	0.0780565	0.0597289	sfrp5/pax2a/epha4a/sox11b/lmo4a	5
GO:0048332	GO:0048332	mesoderm morphogenesis	5/466	57/18569	0.0139924	0.0780565	0.0597289	quo/lpar1/tal1/acvr1ba/tll1	5
GO:0008284	GO:0008284	positive regulation of cell population proliferation	9/466	151/18569	0.014095	0.0784007	0.0599923	fgf5/hapln1b/il34/mycb/fgfr2/meis1b/igf2b/jcada/aplnra	9
GO:0003044	GO:0003044	regulation of systemic arterial blood pressure mediated by a chemical signal	3/466	21/18569	0.0149248	0.0818308	0.062617	edn1/edn2/adrb2a	3
GO:0014029	GO:0014029	neural crest formation	3/466	21/18569	0.0149248	0.0818308	0.062617	zeb2b/zeb2a/parp3	3
GO:0030513	GO:0030513	positive regulation of BMP signaling pathway	3/466	21/18569	0.0149248	0.0818308	0.062617	sfrp5/bmp16/tll1	3
GO:0048934	GO:0048934	peripheral nervous system neuron differentiation	3/466	21/18569	0.0149248	0.0818308	0.062617	notch1b/rtn4a/hdac1	3
GO:0048935	GO:0048935	peripheral nervous system neuron development	3/466	21/18569	0.0149248	0.0818308	0.062617	notch1b/rtn4a/hdac1	3
GO:0048048	GO:0048048	embryonic eye morphogenesis	5/466	58/18569	0.015006	0.0820411	0.062778	mfap5/sfrp5/pax2a/epha4a/sox11b	5
GO:0030335	GO:0030335	positive regulation of cell migration	7/466	103/18569	0.0150797	0.0822098	0.0629071	sema3aa/sema3gb/ccn1/sema4ab/nrp1a/si:dkey-49n23.1/tek	7
GO:0090504	GO:0090504	epiboly	6/466	80/18569	0.0152525	0.0829165	0.0634478	cdh1/cthrc1a/sdc2/aplnra/rhoca/fzd7b	6
GO:0051240	GO:0051240	positive regulation of multicellular organismal process	14/466	292/18569	0.016063	0.0867875	0.0664099	hapln1b/il34/tiam1a/f2r/meis1b/igf2b/sox5/serpinf1/aplnra/tie1/elmo1/tek/hdac1/clec14a	14
GO:0048841	GO:0048841	regulation of axon extension involved in axon guidance	4/466	39/18569	0.0161002	0.0867875	0.0664099	sema3aa/sema3gb/sema4ab/si:dkey-49n23.1	4
GO:0051924	GO:0051924	regulation of calcium ion transport	4/466	39/18569	0.0161002	0.0867875	0.0664099	homer1b/lgals3b/plcb3/aplnra	4
GO:0035282	GO:0035282	segmentation	8/466	130/18569	0.0168621	0.0904361	0.0692018	fn1a/has2/zeb2b/zeb2a/igf2b/calcrla/dld/ccdc80	8
GO:0016339	GO:0016339	calcium-dependent cell-cell adhesion via plasma membrane cell adhesion molecules	3/466	22/18569	0.0169656	0.0904361	0.0692018	cdh1/cdh4/cdh6	3
GO:0048754	GO:0048754	branching morphogenesis of an epithelial tube	3/466	22/18569	0.0169656	0.0904361	0.0692018	tnnt2a/unc5b/spns2	3
GO:0050679	GO:0050679	positive regulation of epithelial cell proliferation	3/466	22/18569	0.0169656	0.0904361	0.0692018	igf2b/jcada/aplnra	3
GO:0060173	GO:0060173	limb development	6/466	82/18569	0.0170527	0.0906488	0.0693646	rspo2/hand2/sall1a/fgfr2/fibinb/chsy1	6
GO:0035023	GO:0035023	regulation of Rho protein signal transduction	5/466	60/18569	0.0171778	0.0910614	0.0696803	arhgef18a/f2r/si:dkey-172h23.2/eps8a/akap12b	5
GO:0030832	GO:0030832	regulation of actin filament length	7/466	106/18569	0.0174121	0.0920489	0.070436	myo3b/vill/ssh1a/add3a/vaspb/svild/cyfip1	7
GO:1903829	GO:1903829	positive regulation of protein localization	4/466	40/18569	0.0175438	0.0924908	0.070774	edn1/mcu/oaz1a/msna	4
GO:0051146	GO:0051146	striated muscle cell differentiation	12/466	239/18569	0.0179496	0.0943706	0.0722125	gata5/tnnt2a/hand2/plod2/ppp2r3a/gpc4/myl9b/icam3/cbfb/tmem88a/nr2f1a/nr2f2	12
GO:0008593	GO:0008593	regulation of Notch signaling pathway	5/466	61/18569	0.0183379	0.0961485	0.0735729	chsy1/dld/gmds/lfng/id2a	5
GO:0019827	GO:0019827	stem cell population maintenance	3/466	23/18569	0.0191544	0.0996132	0.0762241	tal1/celsr1a/notch1b	3
GO:0050654	GO:0050654	chondroitin sulfate proteoglycan metabolic process	3/466	23/18569	0.0191544	0.0996132	0.0762241	dcn/chst7/chsy1	3
GO:1904951	GO:1904951	positive regulation of establishment of protein localization	3/466	23/18569	0.0191544	0.0996132	0.0762241	edn1/mcu/oaz1a	3
GO:0045861	GO:0045861	negative regulation of proteolysis	5/466	62/18569	0.0195484	0.101387	0.0775817	edn1/serpine1/serpinf1/reck/serpinh1b	5
GO:0021915	GO:0021915	neural tube development	7/466	109/18569	0.0199879	0.10311	0.0788996	cdh1/pax2a/celsr1a/mdka/vaspb/wls/hdac1	7
GO:0052547	GO:0052547	regulation of peptidase activity	7/466	109/18569	0.0199879	0.10311	0.0788996	hdr/ctsk/serpine1/serpinf1/gramd4b/reck/serpinh1b	7
GO:0007015	GO:0007015	actin filament organization	15/466	330/18569	0.0200589	0.103198	0.0789676	trpv4/gas2l1/vill/rhoua/ssh1a/mical1/add3a/mcu/rhoca/vaspb/marcksl1b/svild/cnn2/elmo1/cyfip1	15
GO:2000147	GO:2000147	positive regulation of cell motility	7/466	110/18569	0.0209026	0.1072	0.0820298	sema3aa/sema3gb/ccn1/sema4ab/nrp1a/si:dkey-49n23.1/tek	7
GO:0120031	GO:0120031	plasma membrane bounded cell projection assembly	17/466	392/18569	0.0209485	0.1072	0.0820298	myo3b/pax2a/ablim2/fgfr2/eps8a/pam/gpm6ab/si:ch211-71m22.1/dld/yap1/nrp1a/akap12b/amotl2a/selenow2a/sirt2/elmo1/cyfip1	17
GO:0007156	GO:0007156	homophilic cell adhesion via plasma membrane adhesion molecules	9/466	162/18569	0.0212903	0.108534	0.08305	pcdh15b/cntn3a.1/pcdh11/cdh1/pcdh10a/cdh4/sdk1a/cdh6/celsr1a	9
GO:0001738	GO:0001738	morphogenesis of a polarized epithelium	3/466	24/18569	0.0214918	0.108534	0.08305	hand2/fn1a/myh11a	3
GO:0043270	GO:0043270	positive regulation of monoatomic ion transport	3/466	24/18569	0.0214918	0.108534	0.08305	wnk1b/lgals3b/aplnra	3
GO:0061386	GO:0061386	closure of optic fissure	3/466	24/18569	0.0214918	0.108534	0.08305	sfrp5/pax2a/sox11b	3
GO:0097581	GO:0097581	lamellipodium organization	3/466	24/18569	0.0214918	0.108534	0.08305	ablim2/gpc4/cyfip1	3
GO:0060537	GO:0060537	muscle tissue development	12/466	249/18569	0.0238238	0.119031	0.0910825	gata5/nrg2a/tnnt2a/hand2/tbx20/plod2/gata4/icam3/tmem88a/aplnra/nr2f1a/nr2f2	12
GO:0001885	GO:0001885	endothelial cell development	3/466	25/18569	0.023978	0.119031	0.0910825	meis1b/fbn2b/tll1	3
GO:0060415	GO:0060415	muscle tissue morphogenesis	3/466	25/18569	0.023978	0.119031	0.0910825	nrg2a/tnnt2a/gata4	3
GO:0061138	GO:0061138	morphogenesis of a branching epithelium	3/466	25/18569	0.023978	0.119031	0.0910825	tnnt2a/unc5b/spns2	3
GO:0098727	GO:0098727	maintenance of cell number	3/466	25/18569	0.023978	0.119031	0.0910825	tal1/celsr1a/notch1b	3
GO:0030042	GO:0030042	actin filament depolymerization	4/466	44/18569	0.0241097	0.119031	0.0910825	vill/mical1/add3a/svild	4
GO:0035567	GO:0035567	non-canonical Wnt signaling pathway	4/466	44/18569	0.0241097	0.119031	0.0910825	sfrp5/fzd5/fzd4/fzd7b	4
GO:0031016	GO:0031016	pancreas development	9/466	166/18569	0.0244664	0.119031	0.0910825	gata5/foxc1b/fgfr2/fhl1b/ptger2a/bhmt/dld/yap1/hdac1	9
GO:0002757	GO:0002757	immune response-activating signaling pathway	6/466	89/18569	0.0244938	0.119031	0.0910825	prkcbb/si:ch211-214p13.9/btk/mapkapk3/tlr5b/gramd4b	6
GO:0006670	GO:0006670	sphingosine metabolic process	2/466	10/18569	0.024749	0.119031	0.0910825	sphk2/sptlc2a	2
GO:0006851	GO:0006851	mitochondrial calcium ion transmembrane transport	2/466	10/18569	0.024749	0.119031	0.0910825	mcu/smdt1b	2
GO:0010092	GO:0010092	specification of animal organ identity	2/466	10/18569	0.024749	0.119031	0.0910825	fn1a/hdac1	2
GO:0018149	GO:0018149	peptide cross-linking	2/466	10/18569	0.024749	0.119031	0.0910825	tgm2b/f13a1b	2
GO:0034694	GO:0034694	response to prostaglandin	2/466	10/18569	0.024749	0.119031	0.0910825	ptger2a/nfe2l2a	2
GO:0046642	GO:0046642	negative regulation of alpha-beta T cell proliferation	2/466	10/18569	0.024749	0.119031	0.0910825	lgals9l3/lgals9l1	2
GO:0048008	GO:0048008	platelet-derived growth factor receptor signaling pathway	2/466	10/18569	0.024749	0.119031	0.0910825	foxc1b/pdgfra	2
GO:0051897	GO:0051897	positive regulation of phosphatidylinositol 3-kinase/protein kinase B signal transduction	2/466	10/18569	0.024749	0.119031	0.0910825	insra/tek	2
GO:0070365	GO:0070365	hepatocyte differentiation	2/466	10/18569	0.024749	0.119031	0.0910825	socs3a/id2a	2
GO:2000641	GO:2000641	regulation of early endosome to late endosome transport	2/466	10/18569	0.024749	0.119031	0.0910825	map2k1/msna	2
GO:0008360	GO:0008360	regulation of cell shape	5/466	66/18569	0.0249101	0.119208	0.0912181	fn1a/fmnl2a/amotl2a/cyfip1/msna	5
GO:0072175	GO:0072175	epithelial tube formation	5/466	66/18569	0.0249101	0.119208	0.0912181	hand2/cdh1/pax2a/mdka/vaspb	5
GO:0040017	GO:0040017	positive regulation of locomotion	7/466	115/18569	0.0259144	0.12328	0.0943337	sema3aa/sema3gb/ccn1/sema4ab/nrp1a/si:dkey-49n23.1/tek	7
GO:0002429	GO:0002429	immune response-activating cell surface receptor signaling pathway	4/466	45/18569	0.0259536	0.12328	0.0943337	prkcbb/si:ch211-214p13.9/btk/tlr5b	4
GO:0071526	GO:0071526	semaphorin-plexin signaling pathway	4/466	45/18569	0.0259536	0.12328	0.0943337	sema3aa/sema3gb/sema4ab/si:dkey-49n23.1	4
GO:0007188	GO:0007188	adenylate cyclase-modulating G protein-coupled receptor signaling pathway	11/466	224/18569	0.0263612	0.123657	0.0946224	mc1r/adgrl2a/adora2aa/adgrg6/adcy2b/lpar2b/lpar1/ptger2a/adrb2a/calcrla/adgre10	11
GO:0033334	GO:0033334	fin morphogenesis	5/466	67/18569	0.0263837	0.123657	0.0946224	hand2/sall1a/slc43a2a/fibinb/tll1	5
GO:0120032	GO:0120032	regulation of plasma membrane bounded cell projection assembly	5/466	67/18569	0.0263837	0.123657	0.0946224	myo3b/eps8a/gpm6ab/nrp1a/selenow2a	5
GO:0035118	GO:0035118	embryonic pectoral fin morphogenesis	3/466	26/18569	0.026613	0.123657	0.0946224	hand2/sall1a/fibinb	3
GO:0048644	GO:0048644	muscle organ morphogenesis	3/466	26/18569	0.026613	0.123657	0.0946224	nrg2a/tnnt2a/gata4	3
GO:0050851	GO:0050851	antigen receptor-mediated signaling pathway	3/466	26/18569	0.026613	0.123657	0.0946224	prkcbb/si:ch211-214p13.9/btk	3
GO:0060319	GO:0060319	primitive erythrocyte differentiation	3/466	26/18569	0.026613	0.123657	0.0946224	meis1b/kdm6bb/tspo	3
GO:0085029	GO:0085029	extracellular matrix assembly	3/466	26/18569	0.026613	0.123657	0.0946224	has2/has3/gpc4	3
GO:1905517	GO:1905517	macrophage migration	3/466	26/18569	0.026613	0.123657	0.0946224	il34/lgals3b/yrk	3
GO:0052548	GO:0052548	regulation of endopeptidase activity	6/466	91/18569	0.0269631	0.124981	0.0956357	hdr/serpine1/serpinf1/gramd4b/reck/serpinh1b	6
GO:0034329	GO:0034329	cell junction assembly	9/466	169/18569	0.0270598	0.125127	0.0957476	cdh1/ek1/fn1a/cdh4/nbeaa/sdk1a/cdh6/rab13/flot1b	9
GO:0060491	GO:0060491	regulation of cell projection assembly	5/466	68/18569	0.027912	0.128696	0.0984787	myo3b/eps8a/gpm6ab/nrp1a/selenow2a	5
GO:0030162	GO:0030162	regulation of proteolysis	9/466	170/18569	0.0279658	0.128696	0.0984787	edn1/hdr/ctsk/serpine1/serpinf1/gramd4b/reck/serpinh1b/sirt2	9
GO:0098742	GO:0098742	cell-cell adhesion via plasma-membrane adhesion molecules	10/466	198/18569	0.0281882	0.12941	0.0990244	pcdh15b/cntn3a.1/pcdh11/cdh1/pcdh10a/cdh4/sdk1a/cdh6/celsr1a/notch1b	10
GO:0045934	GO:0045934	negative regulation of nucleobase-containing compound metabolic process	18/466	439/18569	0.029156	0.130782	0.100074	gata5/id2b/tbx20/gata4/gata6/zeb2b/mycb/zeb2a/smad9/sox11b/dnajb1b/ccnd1/skila/id2a/nr2f1a/nr2f2/sirt2/hdac1	18
GO:0000302	GO:0000302	response to reactive oxygen species	3/466	27/18569	0.0293962	0.130782	0.100074	mb/sesn1/sesn3	3
GO:0003171	GO:0003171	atrioventricular valve development	3/466	27/18569	0.0293962	0.130782	0.100074	trpv4/has2/nfatc1	3
GO:0010810	GO:0010810	regulation of cell-substrate adhesion	3/466	27/18569	0.0293962	0.130782	0.100074	ek1/ccdc80l2/ccdc80	3
GO:0017015	GO:0017015	regulation of transforming growth factor beta receptor signaling pathway	3/466	27/18569	0.0293962	0.130782	0.100074	tgfbr3/bambib/skila	3
GO:0090100	GO:0090100	positive regulation of transmembrane receptor protein serine/threonine kinase signaling pathway	3/466	27/18569	0.0293962	0.130782	0.100074	sfrp5/bmp16/tll1	3
GO:1903844	GO:1903844	regulation of cellular response to transforming growth factor beta stimulus	3/466	27/18569	0.0293962	0.130782	0.100074	tgfbr3/bambib/skila	3
GO:0060348	GO:0060348	bone development	5/466	69/18569	0.0294952	0.130782	0.100074	edn1/cyp26b1/gpc4/ctsk/wls	5
GO:0002764	GO:0002764	immune response-regulating signaling pathway	6/466	93/18569	0.0295919	0.130782	0.100074	prkcbb/si:ch211-214p13.9/btk/mapkapk3/tlr5b/gramd4b	6
GO:0030201	GO:0030201	heparan sulfate proteoglycan metabolic process	2/466	11/18569	0.0297533	0.130782	0.100074	hs6st3a/hs6st1b	2
GO:0031529	GO:0031529	ruffle organization	2/466	11/18569	0.0297533	0.130782	0.100074	eps8a/cyfip1	2
GO:0051928	GO:0051928	positive regulation of calcium ion transport	2/466	11/18569	0.0297533	0.130782	0.100074	lgals3b/aplnra	2
GO:0060217	GO:0060217	hemangioblast cell differentiation	2/466	11/18569	0.0297533	0.130782	0.100074	lpar1/tal1	2
GO:0060323	GO:0060323	head morphogenesis	2/466	11/18569	0.0297533	0.130782	0.100074	edn1/cyp26b1	2
GO:0060324	GO:0060324	face development	2/466	11/18569	0.0297533	0.130782	0.100074	edn1/kdm6a	2
GO:0042063	GO:0042063	gliogenesis	9/466	172/18569	0.0298414	0.130782	0.100074	f8/hapln1b/pax2a/il34/adgrg6/fmnl2a/icn2/sirt2/hdac1	9
GO:0001706	GO:0001706	endoderm formation	4/466	47/18569	0.0298892	0.130782	0.100074	gata5/fn1a/acvr1ba/aplnra	4
GO:0008277	GO:0008277	regulation of G protein-coupled receptor signaling pathway	4/466	47/18569	0.0298892	0.130782	0.100074	kctd12.2/rgs12a/aplnra/ramp2	4
GO:0048846	GO:0048846	axon extension involved in axon guidance	4/466	47/18569	0.0298892	0.130782	0.100074	sema3aa/sema3gb/sema4ab/si:dkey-49n23.1	4
GO:1902284	GO:1902284	neuron projection extension involved in neuron projection guidance	4/466	47/18569	0.0298892	0.130782	0.100074	sema3aa/sema3gb/sema4ab/si:dkey-49n23.1	4
GO:0006790	GO:0006790	sulfur compound metabolic process	10/466	200/18569	0.0299183	0.130782	0.100074	hs6st3a/mical1/chst7/hs6st1b/chsy1/bhmt/gsr/gstt1b/sult6b1/sult1st1	10
GO:0030111	GO:0030111	regulation of Wnt signaling pathway	9/466	173/18569	0.0308114	0.13438	0.102828	sfrp5/fzd5/btk/bambib/ccnyl1/tmem88a/grb10a/rab8b/reck	9
GO:0010720	GO:0010720	positive regulation of cell development	6/466	94/18569	0.0309672	0.134564	0.102968	hapln1b/il34/tiam1a/serpinf1/hdac1/clec14a	6
GO:0006909	GO:0006909	phagocytosis	5/466	70/18569	0.031134	0.134564	0.102968	anxa1a/gulp1a/srpx/anxa11a/elmo1	5
GO:0035107	GO:0035107	appendage morphogenesis	5/466	70/18569	0.031134	0.134564	0.102968	hand2/sall1a/slc43a2a/fibinb/tll1	5
GO:0050920	GO:0050920	regulation of chemotaxis	5/466	70/18569	0.031134	0.134564	0.102968	sema3aa/sema3gb/sema4ab/nrp1a/si:dkey-49n23.1	5
GO:0048596	GO:0048596	embryonic camera-type eye morphogenesis	4/466	48/18569	0.031982	0.13764	0.105322	sfrp5/pax2a/epha4a/sox11b	4
GO:0043269	GO:0043269	regulation of monoatomic ion transport	11/466	231/18569	0.0319893	0.13764	0.105322	kcnh4b/homer1b/dpp6b/cacna2d2a/kcng2/wnk1b/nkain4/clic2/lgals3b/plcb3/aplnra	11
GO:0030278	GO:0030278	regulation of ossification	3/466	28/18569	0.0323271	0.137866	0.105495	tgfb3/cyp26b1/ecm1b	3
GO:0048368	GO:0048368	lateral mesoderm development	3/466	28/18569	0.0323271	0.137866	0.105495	fgfr2/dld/tal1	3
GO:0051896	GO:0051896	regulation of phosphatidylinositol 3-kinase/protein kinase B signal transduction	3/466	28/18569	0.0323271	0.137866	0.105495	ntrk3a/insra/tek	3
GO:0030031	GO:0030031	cell projection assembly	17/466	413/18569	0.0323291	0.137866	0.105495	myo3b/pax2a/ablim2/fgfr2/eps8a/pam/gpm6ab/si:ch211-71m22.1/dld/yap1/nrp1a/akap12b/amotl2a/selenow2a/sirt2/elmo1/cyfip1	17
GO:0050769	GO:0050769	positive regulation of neurogenesis	5/466	71/18569	0.0328288	0.139546	0.106781	hapln1b/tiam1a/serpinf1/hdac1/clec14a	5
GO:0035270	GO:0035270	endocrine system development	7/466	121/18569	0.0329412	0.139546	0.106781	gata5/hand2/fn1a/pax2a/fhl1b/bhmt/tal1	7
GO:0060828	GO:0060828	regulation of canonical Wnt signaling pathway	7/466	121/18569	0.0329412	0.139546	0.106781	fzd5/btk/bambib/ccnyl1/tmem88a/rab8b/reck	7
GO:0001707	GO:0001707	mesoderm formation	4/466	49/18569	0.0341586	0.143751	0.109998	lpar1/tal1/acvr1ba/tll1	4
GO:0022406	GO:0022406	membrane docking	4/466	49/18569	0.0341586	0.143751	0.109998	rab3da/pam/rab13/rab8b	4
GO:0140056	GO:0140056	organelle localization by membrane tethering	4/466	49/18569	0.0341586	0.143751	0.109998	rab3da/pam/rab13/rab8b	4
GO:0046903	GO:0046903	secretion	12/466	263/18569	0.0342716	0.143911	0.110121	sytl4/edn1/rab3da/cadps2/doc2b/mcu/rab13/slc38a2/rab8b/rab11ba/wls/pla2g12b	12
GO:0010595	GO:0010595	positive regulation of endothelial cell migration	2/466	12/18569	0.0351204	0.143944	0.110146	nrp1a/tek	2
GO:0030206	GO:0030206	chondroitin sulfate biosynthetic process	2/466	12/18569	0.0351204	0.143944	0.110146	chst7/chsy1	2
GO:0033564	GO:0033564	anterior/posterior axon guidance	2/466	12/18569	0.0351204	0.143944	0.110146	unc5b/slit2	2
GO:0035710	GO:0035710	CD4-positive, alpha-beta T cell activation	2/466	12/18569	0.0351204	0.143944	0.110146	lgals9l3/lgals9l1	2
GO:0046519	GO:0046519	sphingoid metabolic process	2/466	12/18569	0.0351204	0.143944	0.110146	sphk2/sptlc2a	2
GO:0046626	GO:0046626	regulation of insulin receptor signaling pathway	2/466	12/18569	0.0351204	0.143944	0.110146	igf2b/grb10a	2
GO:0046633	GO:0046633	alpha-beta T cell proliferation	2/466	12/18569	0.0351204	0.143944	0.110146	lgals9l3/lgals9l1	2
GO:0046640	GO:0046640	regulation of alpha-beta T cell proliferation	2/466	12/18569	0.0351204	0.143944	0.110146	lgals9l3/lgals9l1	2
GO:0048679	GO:0048679	regulation of axon regeneration	2/466	12/18569	0.0351204	0.143944	0.110146	epha4a/socs3a	2
GO:0070570	GO:0070570	regulation of neuron projection regeneration	2/466	12/18569	0.0351204	0.143944	0.110146	epha4a/socs3a	2
GO:0002072	GO:0002072	optic cup morphogenesis involved in camera-type eye development	3/466	29/18569	0.0354046	0.143944	0.110146	sfrp5/pax2a/sox11b	3
GO:0003231	GO:0003231	cardiac ventricle development	3/466	29/18569	0.0354046	0.143944	0.110146	nrg2a/tnnt2a/gata4	3
GO:0032963	GO:0032963	collagen metabolic process	3/466	29/18569	0.0354046	0.143944	0.110146	plod2/mmp11b/p3h2	3
GO:0060059	GO:0060059	embryonic retina morphogenesis in camera-type eye	3/466	29/18569	0.0354046	0.143944	0.110146	sfrp5/foxc1b/meis1b	3
GO:0060872	GO:0060872	semicircular canal development	3/466	29/18569	0.0354046	0.143944	0.110146	adgrg6/chsy1/wls	3
GO:0030900	GO:0030900	forebrain development	8/466	150/18569	0.0356846	0.144775	0.110782	sfrp5/gbx2/igf2b/epha4a/kctd12.2/nrp1a/lmo4a/wls	8
GO:0002768	GO:0002768	immune response-regulating cell surface receptor signaling pathway	4/466	50/18569	0.0364193	0.147444	0.112825	prkcbb/si:ch211-214p13.9/btk/tlr5b	4
GO:0030199	GO:0030199	collagen fibril organization	3/466	30/18569	0.0386275	0.155401	0.118913	plod2/cpamd8/serpinh1b	3
GO:0035329	GO:0035329	hippo signaling	3/466	30/18569	0.0386275	0.155401	0.118913	adgrl2a/yap1/amotl2a	3
GO:0043588	GO:0043588	skin development	3/466	30/18569	0.0386275	0.155401	0.118913	nrg2a/errfi1a/krt8	3
GO:0060047	GO:0060047	heart contraction	9/466	182/18569	0.0405446	0.161216	0.123362	tnnt2a/hand2/adora2aa/myh11a/adrb2a/mcu/icam3/cbfb/junba	9
GO:0001541	GO:0001541	ovarian follicle development	2/466	13/18569	0.040829	0.161216	0.123362	pla2g4aa/pgrmc1	2
GO:0001990	GO:0001990	regulation of systemic arterial blood pressure by hormone	2/466	13/18569	0.040829	0.161216	0.123362	edn1/edn2	2
GO:0010717	GO:0010717	regulation of epithelial to mesenchymal transition	2/466	13/18569	0.040829	0.161216	0.123362	ek1/parp3	2
GO:0032388	GO:0032388	positive regulation of intracellular transport	2/466	13/18569	0.040829	0.161216	0.123362	oaz1a/msna	2
GO:0033336	GO:0033336	caudal fin development	2/466	13/18569	0.040829	0.161216	0.123362	rspo2/tll1	2
GO:0046636	GO:0046636	negative regulation of alpha-beta T cell activation	2/466	13/18569	0.040829	0.161216	0.123362	lgals9l3/lgals9l1	2
GO:0048898	GO:0048898	anterior lateral line system development	2/466	13/18569	0.040829	0.161216	0.123362	adarb1a/edn1	2
GO:1900076	GO:1900076	regulation of cellular response to insulin stimulus	2/466	13/18569	0.040829	0.161216	0.123362	igf2b/grb10a	2
GO:0008154	GO:0008154	actin polymerization or depolymerization	7/466	127/18569	0.0411372	0.161989	0.123954	vill/ssh1a/mical1/add3a/vaspb/svild/cyfip1	7
GO:0010951	GO:0010951	negative regulation of endopeptidase activity	4/466	52/18569	0.0411938	0.161989	0.123954	serpine1/serpinf1/reck/serpinh1b	4
GO:0030866	GO:0030866	cortical actin cytoskeleton organization	3/466	31/18569	0.0419943	0.164142	0.125602	fmnl2a/rab13/amotl2a	3
GO:0051209	GO:0051209	release of sequestered calcium ion into cytosol	3/466	31/18569	0.0419943	0.164142	0.125602	plcd1a/plcb3/aplnra	3
GO:0010001	GO:0010001	glial cell differentiation	8/466	155/18569	0.0419978	0.164142	0.125602	f8/hapln1b/pax2a/il34/adgrg6/fmnl2a/icn2/hdac1	8
GO:1903530	GO:1903530	regulation of secretion by cell	7/466	128/18569	0.0426209	0.166239	0.127206	edn1/rab3da/doc2b/mcu/rab13/slc38a2/rab8b	7
GO:0060627	GO:0060627	regulation of vesicle-mediated transport	8/466	156/18569	0.0433437	0.168423	0.128878	rab3da/map2k1/doc2b/rab13/lgals3b/rab8b/msna/flot1b	8
GO:0021782	GO:0021782	glial cell development	6/466	102/18569	0.0434769	0.168423	0.128878	f8/pax2a/il34/adgrg6/fmnl2a/icn2	6
GO:0030833	GO:0030833	regulation of actin filament polymerization	6/466	102/18569	0.0434769	0.168423	0.128878	vill/ssh1a/add3a/vaspb/svild/cyfip1	6
GO:0010466	GO:0010466	negative regulation of peptidase activity	4/466	53/18569	0.0437076	0.168423	0.128878	serpine1/serpinf1/reck/serpinh1b	4
GO:0030837	GO:0030837	negative regulation of actin filament polymerization	4/466	53/18569	0.0437076	0.168423	0.128878	vill/ssh1a/add3a/svild	4
GO:0032272	GO:0032272	negative regulation of protein polymerization	4/466	53/18569	0.0437076	0.168423	0.128878	vill/ssh1a/add3a/svild	4
GO:0071466	GO:0071466	cellular response to xenobiotic stimulus	5/466	77/18569	0.0441944	0.169958	0.130052	cyp2r1/aldh2.2/nfe2l2a/sult6b1/sult1st1	5
GO:0003015	GO:0003015	heart process	9/466	186/18569	0.045472	0.173947	0.133104	tnnt2a/hand2/adora2aa/myh11a/adrb2a/mcu/icam3/cbfb/junba	9
GO:0034332	GO:0034332	adherens junction organization	3/466	32/18569	0.0455035	0.173947	0.133104	cdh1/cdh4/cdh6	3
GO:0040036	GO:0040036	regulation of fibroblast growth factor receptor signaling pathway	3/466	32/18569	0.0455035	0.173947	0.133104	sall1a/zeb2a/spry2	3
GO:0055113	GO:0055113	epiboly involved in gastrulation with mouth forming second	4/466	54/18569	0.0463058	0.175257	0.134107	cdh1/cthrc1a/sdc2/aplnra	4
GO:0097553	GO:0097553	calcium ion transmembrane import into cytosol	4/466	54/18569	0.0463058	0.175257	0.134107	trpv4/plcd1a/plcb3/aplnra	4
GO:0032940	GO:0032940	secretion by cell	11/466	246/18569	0.0468237	0.175257	0.134107	sytl4/edn1/rab3da/cadps2/doc2b/mcu/rab13/slc38a2/rab8b/rab11ba/wls	11
GO:0007413	GO:0007413	axonal fasciculation	2/466	14/18569	0.0468587	0.175257	0.134107	ek1/nrp1a	2
GO:0016239	GO:0016239	positive regulation of macroautophagy	2/466	14/18569	0.0468587	0.175257	0.134107	sesn1/sesn3	2
GO:0030204	GO:0030204	chondroitin sulfate metabolic process	2/466	14/18569	0.0468587	0.175257	0.134107	chst7/chsy1	2
GO:0030216	GO:0030216	keratinocyte differentiation	2/466	14/18569	0.0468587	0.175257	0.134107	errfi1a/krt8	2
GO:0040037	GO:0040037	negative regulation of fibroblast growth factor receptor signaling pathway	2/466	14/18569	0.0468587	0.175257	0.134107	zeb2a/spry2	2
GO:0046620	GO:0046620	regulation of organ growth	2/466	14/18569	0.0468587	0.175257	0.134107	tbx20/yap1	2
GO:0061300	GO:0061300	cerebellum vasculature development	2/466	14/18569	0.0468587	0.175257	0.134107	foxc1b/pdgfra	2
GO:0106030	GO:0106030	neuron projection fasciculation	2/466	14/18569	0.0468587	0.175257	0.134107	ek1/nrp1a	2
GO:0007266	GO:0007266	Rho protein signal transduction	6/466	104/18569	0.0470336	0.175257	0.134107	arhgef18a/rhoua/f2r/si:dkey-172h23.2/eps8a/akap12b	6
GO:0008064	GO:0008064	regulation of actin polymerization or depolymerization	6/466	104/18569	0.0470336	0.175257	0.134107	vill/ssh1a/add3a/vaspb/svild/cyfip1	6
GO:0044089	GO:0044089	positive regulation of cellular component biogenesis	6/466	105/18569	0.0488776	0.180353	0.138007	myo3b/eps8a/nrp1a/selenow2a/vaspb/flot1b	6
GO:0001841	GO:0001841	neural tube formation	3/466	33/18569	0.0491531	0.180353	0.138007	cdh1/mdka/vaspb	3
GO:0035138	GO:0035138	pectoral fin morphogenesis	3/466	33/18569	0.0491531	0.180353	0.138007	hand2/sall1a/fibinb	3
GO:0051208	GO:0051208	sequestering of calcium ion	3/466	33/18569	0.0491531	0.180353	0.138007	plcd1a/plcb3/aplnra	3
GO:0051223	GO:0051223	regulation of protein transport	3/466	33/18569	0.0491531	0.180353	0.138007	edn1/mcu/oaz1a	3
GO:0051282	GO:0051282	regulation of sequestering of calcium ion	3/466	33/18569	0.0491531	0.180353	0.138007	plcd1a/plcb3/aplnra	3
GO:0051283	GO:0051283	negative regulation of sequestering of calcium ion	3/466	33/18569	0.0491531	0.180353	0.138007	plcd1a/plcb3/aplnra	3
GO:0070509	GO:0070509	calcium ion import	3/466	33/18569	0.0491531	0.180353	0.138007	trpv4/lgals3b/plcb3	3
GO:0032956	GO:0032956	regulation of actin cytoskeleton organization	9/466	189/18569	0.0494194	0.180985	0.13849	myo3b/ek1/vill/ssh1a/add3a/rhoca/vaspb/svild/cyfip1	9
GO:0022604	GO:0022604	regulation of cell morphogenesis	5/466	80/18569	0.0506581	0.184816	0.141421	fn1a/fmnl2a/amotl2a/cyfip1/msna	5
GO:0070121	GO:0070121	Kupffer's vesicle development	5/466	80/18569	0.0506581	0.184816	0.141421	gata5/sdc2/yap1/akap12b/aplnra	5
GO:0001764	GO:0001764	neuron migration	4/466	56/18569	0.0517545	0.188457	0.144208	cdh1/sema3aa/ackr3b/hdac1	4
GO:0051046	GO:0051046	regulation of secretion	7/466	134/18569	0.0522481	0.189894	0.145307	edn1/rab3da/doc2b/mcu/rab13/slc38a2/rab8b	7
GO:0032386	GO:0032386	regulation of intracellular transport	3/466	34/18569	0.0529412	0.190787	0.145991	map2k1/oaz1a/msna	3
GO:0043491	GO:0043491	phosphatidylinositol 3-kinase/protein kinase B signal transduction	3/466	34/18569	0.0529412	0.190787	0.145991	ntrk3a/insra/tek	3
GO:0010634	GO:0010634	positive regulation of epithelial cell migration	2/466	15/18569	0.0531898	0.190787	0.145991	nrp1a/tek	2
GO:0030512	GO:0030512	negative regulation of transforming growth factor beta receptor signaling pathway	2/466	15/18569	0.0531898	0.190787	0.145991	bambib/skila	2
GO:0043535	GO:0043535	regulation of blood vessel endothelial cell migration	2/466	15/18569	0.0531898	0.190787	0.145991	reck/cnn2	2
GO:0060606	GO:0060606	tube closure	2/466	15/18569	0.0531898	0.190787	0.145991	adgrg6/vaspb	2
GO:2000401	GO:2000401	regulation of lymphocyte migration	2/466	15/18569	0.0531898	0.190787	0.145991	stk10/spns2	2
GO:0032970	GO:0032970	regulation of actin filament-based process	9/466	192/18569	0.0535868	0.191853	0.146806	myo3b/ek1/vill/ssh1a/add3a/rhoca/vaspb/svild/cyfip1	9
GO:0030010	GO:0030010	establishment of cell polarity	4/466	57/18569	0.0546044	0.193332	0.147938	cdh1/fn1a/gpc4/amotl2a	4
GO:0035150	GO:0035150	regulation of tube size	4/466	57/18569	0.0546044	0.193332	0.147938	edn1/edn2/urp1/adrb2a	4
GO:0035296	GO:0035296	regulation of tube diameter	4/466	57/18569	0.0546044	0.193332	0.147938	edn1/edn2/urp1/adrb2a	4
GO:0045664	GO:0045664	regulation of neuron differentiation	4/466	57/18569	0.0546044	0.193332	0.147938	cdh4/slc18a2/lfng/id2a	4
GO:0097746	GO:0097746	blood vessel diameter maintenance	4/466	57/18569	0.0546044	0.193332	0.147938	edn1/edn2/urp1/adrb2a	4
GO:1902476	GO:1902476	chloride transmembrane transport	4/466	57/18569	0.0546044	0.193332	0.147938	slc6a4a/clic2/slc12a7b/ano5b	4
GO:0043534	GO:0043534	blood vessel endothelial cell migration	3/466	35/18569	0.0568654	0.200966	0.15378	fn1a/reck/cnn2	3
GO:0006027	GO:0006027	glycosaminoglycan catabolic process	2/466	16/18569	0.0598035	0.208281	0.159377	lygl1/hyal2b	2
GO:0007044	GO:0007044	cell-substrate junction assembly	2/466	16/18569	0.0598035	0.208281	0.159377	ek1/fn1a	2
GO:0009067	GO:0009067	aspartate family amino acid biosynthetic process	2/466	16/18569	0.0598035	0.208281	0.159377	got1/bhmt	2
GO:0045931	GO:0045931	positive regulation of mitotic cell cycle	2/466	16/18569	0.0598035	0.208281	0.159377	ccnd1/mdka	2
GO:0046634	GO:0046634	regulation of alpha-beta T cell activation	2/466	16/18569	0.0598035	0.208281	0.159377	lgals9l3/lgals9l1	2
GO:0048936	GO:0048936	peripheral nervous system neuron axonogenesis	2/466	16/18569	0.0598035	0.208281	0.159377	notch1b/rtn4a	2
GO:0150115	GO:0150115	cell-substrate junction organization	2/466	16/18569	0.0598035	0.208281	0.159377	ek1/fn1a	2
GO:1904262	GO:1904262	negative regulation of TORC1 signaling	2/466	16/18569	0.0598035	0.208281	0.159377	sesn1/sesn3	2
GO:0031333	GO:0031333	negative regulation of protein-containing complex assembly	4/466	59/18569	0.0605537	0.210512	0.161084	vill/ssh1a/add3a/svild	4
GO:0051962	GO:0051962	positive regulation of nervous system development	5/466	85/18569	0.0625981	0.217226	0.166221	hapln1b/tiam1a/serpinf1/hdac1/clec14a	5
GO:0022407	GO:0022407	regulation of cell-cell adhesion	6/466	112/18569	0.0630223	0.218303	0.167046	snai1b/f2r/igf2b/lgals9l3/lgals9l1/flot1b	6
GO:0090288	GO:0090288	negative regulation of cellular response to growth factor stimulus	4/466	60/18569	0.0636519	0.220087	0.168411	zeb2a/smad6a/skila/spry2	4
GO:0048919	GO:0048919	posterior lateral line neuromast development	3/466	37/18569	0.065113	0.224093	0.171476	wnk1b/socs3a/rtn4a	3
GO:0061035	GO:0061035	regulation of cartilage development	3/466	37/18569	0.065113	0.224093	0.171476	tgfb3/sox5/spns2	3
GO:0009410	GO:0009410	response to xenobiotic stimulus	5/466	86/18569	0.0651609	0.224093	0.171476	cyp2r1/aldh2.2/nfe2l2a/sult6b1/sult1st1	5
GO:0002042	GO:0002042	cell migration involved in sprouting angiogenesis	2/466	17/18569	0.0666817	0.226482	0.173304	fn1a/reck	2
GO:0034109	GO:0034109	homotypic cell-cell adhesion	2/466	17/18569	0.0666817	0.226482	0.173304	cxadr/pdgfra	2
GO:0035476	GO:0035476	angioblast cell migration	2/466	17/18569	0.0666817	0.226482	0.173304	meis1b/aplnra	2
GO:0048246	GO:0048246	macrophage chemotaxis	2/466	17/18569	0.0666817	0.226482	0.173304	lgals3b/yrk	2
GO:0050886	GO:0050886	endocrine process	2/466	17/18569	0.0666817	0.226482	0.173304	edn1/edn2	2
GO:0050935	GO:0050935	iridophore differentiation	2/466	17/18569	0.0666817	0.226482	0.173304	gbx2/sox5	2
GO:0055064	GO:0055064	chloride ion homeostasis	2/466	17/18569	0.0666817	0.226482	0.173304	slc12a7b/calcrla	2
GO:0051346	GO:0051346	negative regulation of hydrolase activity	4/466	61/18569	0.0668319	0.226591	0.173388	serpine1/serpinf1/reck/serpinh1b	4
GO:0048793	GO:0048793	pronephros development	7/466	143/18569	0.069069	0.233752	0.178867	tnnt2a/pax2a/igf2b/ptger2a/cdh6/yap1/camk2g2	7
GO:0045103	GO:0045103	intermediate filament-based process	3/466	38/18569	0.0694313	0.233752	0.178867	krt8/eppk1/krt18a.1	3
GO:0045104	GO:0045104	intermediate filament cytoskeleton organization	3/466	38/18569	0.0694313	0.233752	0.178867	krt8/eppk1/krt18a.1	3
GO:0051693	GO:0051693	actin filament capping	3/466	38/18569	0.0694313	0.233752	0.178867	vill/add3a/svild	3
GO:0022037	GO:0022037	metencephalon development	4/466	62/18569	0.0700928	0.235154	0.17994	gbx2/pax2a/ca8/hdac1	4
GO:0060216	GO:0060216	definitive hemopoiesis	4/466	62/18569	0.0700928	0.235154	0.17994	mycb/meis1b/ccn2a/tal1	4
GO:0032271	GO:0032271	regulation of protein polymerization	6/466	116/18569	0.0720818	0.239068	0.182935	vill/ssh1a/add3a/vaspb/svild/cyfip1	6
GO:0060341	GO:0060341	regulation of cellular localization	6/466	116/18569	0.0720818	0.239068	0.182935	edn1/map2k1/gpc4/mcu/oaz1a/msna	6
GO:0032880	GO:0032880	regulation of protein localization	5/466	89/18569	0.0731963	0.239068	0.182935	edn1/gpc4/mcu/oaz1a/msna	5
GO:0044272	GO:0044272	sulfur compound biosynthetic process	5/466	89/18569	0.0731963	0.239068	0.182935	hs6st3a/chst7/hs6st1b/chsy1/bhmt	5
GO:1902532	GO:1902532	negative regulation of intracellular signal transduction	7/466	145/18569	0.0731997	0.239068	0.182935	adgrl2a/smad6a/sesn1/akap12b/aplnra/spry2/sesn3	7
GO:0003181	GO:0003181	atrioventricular valve morphogenesis	2/466	18/18569	0.073807	0.239068	0.182935	has2/nfatc1	2
GO:0008585	GO:0008585	female gonad development	2/466	18/18569	0.073807	0.239068	0.182935	pla2g4aa/pgrmc1	2
GO:0010171	GO:0010171	body morphogenesis	2/466	18/18569	0.073807	0.239068	0.182935	edn1/cyp26b1	2
GO:0021548	GO:0021548	pons development	2/466	18/18569	0.073807	0.239068	0.182935	pax2a/hdac1	2
GO:0021554	GO:0021554	optic nerve development	2/466	18/18569	0.073807	0.239068	0.182935	slit2/rtn4a	2
GO:0030032	GO:0030032	lamellipodium assembly	2/466	18/18569	0.073807	0.239068	0.182935	ablim2/cyfip1	2
GO:0034312	GO:0034312	diol biosynthetic process	2/466	18/18569	0.073807	0.239068	0.182935	sphk2/sptlc2a	2
GO:0038084	GO:0038084	vascular endothelial growth factor signaling pathway	2/466	18/18569	0.073807	0.239068	0.182935	nrp1a/cd63	2
GO:0042177	GO:0042177	negative regulation of protein catabolic process	2/466	18/18569	0.073807	0.239068	0.182935	edn1/sirt2	2
GO:0051058	GO:0051058	negative regulation of small GTPase mediated signal transduction	2/466	18/18569	0.073807	0.239068	0.182935	akap12b/spry2	2
GO:0060079	GO:0060079	excitatory postsynaptic potential	2/466	18/18569	0.073807	0.239068	0.182935	grin2bb/p2rx1	2
GO:0061041	GO:0061041	regulation of wound healing	2/466	18/18569	0.073807	0.239068	0.182935	f2r/serpine1	2
GO:0071675	GO:0071675	regulation of mononuclear cell migration	2/466	18/18569	0.073807	0.239068	0.182935	stk10/spns2	2
GO:0030834	GO:0030834	regulation of actin filament depolymerization	3/466	39/18569	0.0738755	0.239068	0.182935	vill/add3a/svild	3
GO:0030835	GO:0030835	negative regulation of actin filament depolymerization	3/466	39/18569	0.0738755	0.239068	0.182935	vill/add3a/svild	3
GO:0060900	GO:0060900	embryonic camera-type eye formation	3/466	39/18569	0.0738755	0.239068	0.182935	sfrp5/pax2a/sox11b	3
GO:0002253	GO:0002253	activation of immune response	6/466	117/18569	0.0744575	0.240545	0.184066	prkcbb/si:ch211-214p13.9/btk/mapkapk3/tlr5b/gramd4b	6
GO:0007160	GO:0007160	cell-matrix adhesion	5/466	90/18569	0.0759897	0.245083	0.187538	epdl2/ek1/fn1a/itga9/itga6l	5
GO:0022408	GO:0022408	negative regulation of cell-cell adhesion	4/466	64/18569	0.0768547	0.247457	0.189354	snai1b/f2r/lgals9l3/lgals9l1	4
GO:0015804	GO:0015804	neutral amino acid transport	3/466	40/18569	0.078443	0.251306	0.192299	slc43a2a/slc38a2/slc38a5b	3
GO:0032869	GO:0032869	cellular response to insulin stimulus	3/466	40/18569	0.078443	0.251306	0.192299	igf2b/rab13/grb10a	3
GO:0048278	GO:0048278	vesicle docking	3/466	40/18569	0.078443	0.251306	0.192299	rab3da/rab13/rab8b	3
GO:0051247	GO:0051247	positive regulation of protein metabolic process	11/466	270/18569	0.0792413	0.253338	0.193855	fgf5/hdr/il34/ctsk/dip2ba/gramd4b/mob3c/aplnra/oaz1a/wdfy2/sirt2	11
GO:0030041	GO:0030041	actin filament polymerization	6/466	119/18569	0.0793414	0.253338	0.193855	vill/ssh1a/add3a/vaspb/svild/cyfip1	6
GO:1902904	GO:1902904	negative regulation of supramolecular fiber organization	4/466	65/18569	0.080354	0.254496	0.19474	vill/ssh1a/add3a/svild	4
GO:0001818	GO:0001818	negative regulation of cytokine production	2/466	19/18569	0.0811627	0.254496	0.19474	lgals9l3/lgals9l1	2
GO:0010811	GO:0010811	positive regulation of cell-substrate adhesion	2/466	19/18569	0.0811627	0.254496	0.19474	ccdc80l2/ccdc80	2
GO:0017121	GO:0017121	plasma membrane phospholipid scrambling	2/466	19/18569	0.0811627	0.254496	0.19474	si:ch211-71m22.1/plscr3b	2
GO:0018126	GO:0018126	protein hydroxylation	2/466	19/18569	0.0811627	0.254496	0.19474	plod2/egln1b	2
GO:0021952	GO:0021952	central nervous system projection neuron axonogenesis	2/466	19/18569	0.0811627	0.254496	0.19474	slit2/slit3	2
GO:0021986	GO:0021986	habenula development	2/466	19/18569	0.0811627	0.254496	0.19474	kctd12.2/wls	2
GO:0034198	GO:0034198	cellular response to amino acid starvation	2/466	19/18569	0.0811627	0.254496	0.19474	sesn1/sesn3	2
GO:0046545	GO:0046545	development of primary female sexual characteristics	2/466	19/18569	0.0811627	0.254496	0.19474	pla2g4aa/pgrmc1	2
GO:0048015	GO:0048015	phosphatidylinositol-mediated signaling	2/466	19/18569	0.0811627	0.254496	0.19474	plcd1a/plcb3	2
GO:1903670	GO:1903670	regulation of sprouting angiogenesis	2/466	19/18569	0.0811627	0.254496	0.19474	adgrg6/sox11b	2
GO:0007163	GO:0007163	establishment or maintenance of cell polarity	6/466	120/18569	0.0818494	0.25623	0.196067	cdh1/fn1a/rhoua/gpc4/amotl2a/notch1b	6
GO:0007264	GO:0007264	small GTPase-mediated signal transduction	12/466	304/18569	0.0826478	0.258308	0.197658	arhgef18a/tiam1a/rhoua/f2r/rapgef5a/si:dkey-172h23.2/eps8a/ksr1b/akap12b/spry2/rhoca/rap2c	12
GO:0000082	GO:0000082	G1/S transition of mitotic cell cycle	3/466	41/18569	0.0831307	0.258554	0.197846	meis1b/pla2g4aa/ccnd1	3
GO:0033500	GO:0033500	carbohydrate homeostasis	3/466	41/18569	0.0831307	0.258554	0.197846	insra/mcu/yap1	3
GO:0042593	GO:0042593	glucose homeostasis	3/466	41/18569	0.0831307	0.258554	0.197846	insra/mcu/yap1	3
GO:0055001	GO:0055001	muscle cell development	10/466	241/18569	0.0832716	0.258573	0.19786	tnnt2a/plod2/ppp2r3a/gpc4/myl9b/icam3/actn1/akap12b/cbfb/nr2f2	10
GO:0051651	GO:0051651	maintenance of location in cell	4/466	66/18569	0.083931	0.2602	0.199105	plcd1a/fth1a/plcb3/aplnra	4
GO:0140352	GO:0140352	export from cell	11/466	273/18569	0.0840875	0.260264	0.199155	sytl4/edn1/rab3da/cadps2/doc2b/mcu/rab13/slc38a2/rab8b/rab11ba/wls	11

## Sheet: tab.go_DEG_Multi36_cluster4
36 hpf cl 4	ID	Description	GeneRatio	BgRatio	pvalue	p.adjust	qvalue	geneID	Count
GO:0007059	GO:0007059	chromosome segregation	62/255	179/18569	3.11925e-71	3.39686e-68	2.71867e-68	fam83d/nek2/ccnb1/prc1a/prc1b/nusap1/kifc1/kif11/cenpf/bub1bb/bub1ba/top2a/mki67/kif23/cdca8/mad2l1/cenpt/ttk/zgc:86764/oip5/espl1/sgo1/knstrn/spdl1/cenpi/si:ch211-244o22.2/aurkb/nuf2/gcna/racgap1/knl1/si:dkey-25o16.4/dlgap5/ncaph/ndc80/ska1/ska3/bub1/cdca5/ncapd2/spc24/ncapg/pttg1/mis18a/kif18a/spc25/cenpk/bub3/smc2/cenpn/cdc27/nde1/kntc1/cenpw/haus4/nsl1/smc4/cenph/ncaph2/si:dkey-6i22.5/rad21a/…	62
GO:1903047	GO:1903047	mitotic cell cycle process	69/255	305/18569	4.81082e-65	2.61949e-62	2.09651e-62	ccnb1/ccnb3/bora/bmb/tacc3/prc1a/prc1b/nusap1/cdk1/kifc1/aurka/kif11/cenpf/bub1bb/tpx2/ccnb2/bub1ba/plk1/mad2l1bp/ect2/mki67/kif23/cdca8/mad2l1/ttk/zgc:86764/knstrn/spdl1/cenpi/si:ch211-244o22.2/aurkb/nuf2/miip/cdc14b/gcna/anln/racgap1/cep55l/dlgap5/ncaph/ccnf/ndc80/mus81/ska1/ccna2/bub1/cdca5/ncapd2/gpsm2/ncapg/ube2s/kif18a/cdc25b/fbxo5/ckap5/cenpk/bub3/tmpoa/smc2/cdc27/nde1/kntc1/nsl1/smc4/cenp…	69
GO:0140014	GO:0140014	mitotic nuclear division	48/255	111/18569	1.37718e-60	4.99917e-58	4.00108e-58	ccnb1/bora/bmb/prc1a/prc1b/nusap1/kifc1/aurka/kif11/bub1bb/bub1ba/mad2l1bp/mki67/kif23/cdca8/mad2l1/ttk/zgc:86764/knstrn/spdl1/cenpi/si:ch211-244o22.2/nuf2/cdc14b/gcna/racgap1/ncaph/ndc80/ska1/bub1/cdca5/ncapd2/ncapg/ube2s/kif18a/fbxo5/cenpk/bub3/tmpoa/smc2/nde1/kntc1/nsl1/smc4/ncaph2/reep3b/banf1/ran	48
GO:0000280	GO:0000280	nuclear division	54/255	165/18569	2.82326e-60	6.27769e-58	5.02434e-58	ccnb1/bora/bmb/prc1a/prc1b/nusap1/kifc1/aurka/kif11/bub1bb/bub1ba/top2a/mad2l1bp/mki67/kif23/cdca8/mad2l1/ttk/zgc:86764/espl1/sgo1/knstrn/spdl1/cenpi/si:ch211-244o22.2/nuf2/cdc14b/gcna/racgap1/ncaph/ndc80/mus81/ska1/bub1/cdca5/ncapd2/ncapg/pttg1/ube2s/kif18a/fbxo5/cenpk/bub3/tmpoa/smc2/nde1/kntc1/nsl1/cenpx/smc4/ncaph2/reep3b/banf1/ran	54
GO:0051276	GO:0051276	chromosome organization	61/255	243/18569	2.88232e-60	6.27769e-58	5.02434e-58	pif1/ccnb1/prc1a/prc1b/nusap1/kifc1/kif11/bub1bb/bub1ba/top2a/kif23/cdca8/mad2l1/cenpt/ttk/zgc:86764/oip5/knstrn/spdl1/cenpi/nuf2/racgap1/dlgap5/ncaph/ndc80/ska1/bub1/cdca5/ncapd2/ncapg/pttg1/zgc:153405/si:dkey-108k21.21/pot1/si:ch211-113a14.24/zgc:110425/si:dkey-108k21.10/mis18a/kif18a/fbxo5/cenpk/si:dkey-23a13.9/bub3/smc2/cenpn/cdc27/kntc1/si:dkey-23a13.17/cenpw/si:ch211-113a14.18/si:ch73-368j2…	61
GO:0048285	GO:0048285	organelle fission	55/255	188/18569	2.60692e-58	4.73156e-56	3.78689e-56	ccnb1/bora/bmb/prc1a/prc1b/nusap1/kifc1/aurka/kif11/mtfr2/bub1bb/bub1ba/top2a/mad2l1bp/mki67/kif23/cdca8/mad2l1/ttk/zgc:86764/espl1/sgo1/knstrn/spdl1/cenpi/si:ch211-244o22.2/nuf2/cdc14b/gcna/racgap1/ncaph/ndc80/mus81/ska1/bub1/cdca5/ncapd2/ncapg/pttg1/ube2s/kif18a/fbxo5/cenpk/bub3/tmpoa/smc2/nde1/kntc1/nsl1/cenpx/smc4/ncaph2/reep3b/banf1/ran	55
GO:0098813	GO:0098813	nuclear chromosome segregation	43/255	110/18569	6.97034e-52	1.08439e-49	8.67886e-50	fam83d/ccnb1/prc1a/prc1b/nusap1/kifc1/kif11/cenpf/bub1bb/bub1ba/top2a/kif23/cdca8/mad2l1/ttk/zgc:86764/espl1/sgo1/knstrn/spdl1/cenpi/nuf2/racgap1/knl1/si:dkey-25o16.4/ncaph/ndc80/ska1/bub1/cdca5/ncapd2/ncapg/pttg1/kif18a/cenpk/bub3/smc2/cdc27/kntc1/nsl1/smc4/ncaph2/ran	43
GO:0000819	GO:0000819	sister chromatid segregation	36/255	80/18569	3.05966e-46	4.16496e-44	3.33342e-44	ccnb1/prc1a/prc1b/nusap1/kifc1/kif11/bub1bb/bub1ba/top2a/kif23/cdca8/mad2l1/ttk/zgc:86764/knstrn/spdl1/cenpi/nuf2/racgap1/ncaph/ndc80/ska1/bub1/cdca5/ncapd2/ncapg/kif18a/cenpk/bub3/smc2/cdc27/kntc1/nsl1/smc4/ncaph2/ran	36
GO:0000070	GO:0000070	mitotic sister chromatid segregation	34/255	71/18569	6.75805e-45	8.17724e-43	6.54464e-43	ccnb1/prc1a/prc1b/nusap1/kifc1/kif11/bub1bb/bub1ba/kif23/cdca8/mad2l1/ttk/zgc:86764/knstrn/spdl1/cenpi/nuf2/racgap1/ncaph/ndc80/ska1/bub1/cdca5/ncapd2/ncapg/kif18a/cenpk/bub3/smc2/kntc1/nsl1/smc4/ncaph2/ran	34
GO:0051301	GO:0051301	cell division	53/255	307/18569	5.33947e-43	5.81469e-41	4.65377e-41	fam83d/ccnb1/ccnb3/bora/nusap1/cdk1/cdc20/aurka/kif11/ccnb2/plk1/ect2/cks2/kif23/cdca8/ttk/oip5/sgo1/spdl1/si:ch211-244o22.2/aurkb/nuf2/cdc14b/anln/racgap1/knl1/cep55l/si:dkey-25o16.4/ncaph/ccnf/ndc80/mastl/ska1/ska3/ccna2/cdca5/ncapd2/spc24/ncapg/ube2s/mis18a/arpp19b/cks1b/cdc25b/fbxo5/spc25/cdc27/fzr1a/vrk1/si:dkey-6i22.5/reep3b/ppp1caa/rad21a	53
GO:0030261	GO:0030261	chromosome condensation	19/255	31/18569	2.56419e-28	2.53855e-26	2.03173e-26	nusap1/top2a/ncaph/ncapd2/ncapg/zgc:153405/si:dkey-108k21.21/si:ch211-113a14.24/zgc:110425/si:dkey-108k21.10/si:dkey-23a13.9/smc2/si:dkey-23a13.17/si:ch211-113a14.18/si:ch73-368j24.12/si:dkey-261m9.12/smc4/si:dkey-108k21.14/ncaph2	19
GO:0065004	GO:0065004	protein-DNA complex assembly	25/255	85/18569	8.88627e-27	8.06429e-25	6.45424e-25	cenpt/oip5/cenpi/dlgap5/zgc:153405/si:dkey-108k21.21/rad52/si:ch211-113a14.24/zgc:110425/si:dkey-108k21.10/mis18a/cenpk/si:dkey-23a13.9/cenpn/kntc1/si:dkey-23a13.17/cenpw/si:ch211-113a14.18/si:ch73-368j24.12/si:dkey-261m9.12/cenpx/cenph/zgc:163040/seta/setb	25
GO:0010564	GO:0010564	regulation of cell cycle process	34/255	218/18569	4.1632e-26	3.48748e-24	2.7912e-24	fam83d/bora/cdk1/aurka/cenpf/bub1bb/tpx2/bub1ba/mad2l1bp/ect2/mki67/mad2l1/ttk/knstrn/spdl1/si:ch211-244o22.2/aurkb/miip/cdc14b/gcna/si:dkey-25o16.4/ccnf/ndc80/mus81/bub1/cdca5/dbf4/dbf4b/cdc25b/fbxo5/bub3/cdc27/kntc1/wdr76	34
GO:0051726	GO:0051726	regulation of cell cycle	44/255	466/18569	2.35819e-24	1.83434e-22	1.46811e-22	fam83d/ccnb1/ccnb3/bora/cdk1/aurka/kif11/birc5a/cenpf/bub1bb/tpx2/ccnb2/bub1ba/mad2l1bp/ect2/cks2/mki67/mad2l1/ttk/knstrn/spdl1/si:ch211-244o22.2/aurkb/miip/cdc14b/gcna/si:dkey-25o16.4/dlgap5/ccnf/ndc80/mus81/ccna2/bub1/cdca5/dbf4/dbf4b/cks1b/cdc25b/fbxo5/bub3/cdc27/kntc1/cenpw/wdr76	44
GO:0000226	GO:0000226	microtubule cytoskeleton organization	39/255	369/18569	2.03562e-23	1.47786e-21	1.1828e-21	bora/aspm/tacc3/prc1a/prc1b/nusap1/kifc1/aurka/kif11/tpx2/plk1/kif23/zgc:86764/knstrn/spdl1/aurkb/nuf2/cdc14b/racgap1/dlgap5/ccnf/ndc80/si:ch211-266i6.3/tuba1b/ska1/gpsm2/wdr62/kif18a/plk4/ckap5/sdccag8/nde1/haus4/cenph/stmn1a/tubb4b/tuba1c/si:ch211-114n24.6/tuba8l4	39
GO:0071824	GO:0071824	protein-DNA complex organization	39/255	373/18569	3.02838e-23	2.06119e-21	1.64967e-21	cenpt/oip5/cenpi/hist1h2a4/dlgap5/hist1h2a1/zgc:153405/si:dkey-108k21.21/rad52/si:ch211-113a14.24/zgc:110425/si:dkey-108k21.10/hist1h2a3/mis18a/si:dkey-108k21.19/hist1h2a5/cenpk/si:dkey-23a13.9/cenpn/kntc1/si:dkey-23a13.17/cenpw/si:ch211-113a14.18/si:ch73-368j24.12/si:dkey-261m9.12/cenpx/cenph/lmnb1/zgc:163040/h2ax/h2ax1/dek/hmgn2/cbx3a/ddx39ab/seta/banf1/h2az2b/setb	39
GO:0044770	GO:0044770	cell cycle phase transition	28/255	167/18569	1.54149e-22	9.87461e-21	7.90312e-21	fam83d/ccnb1/ccnb3/cdk1/cenpf/bub1bb/ccnb2/bub1ba/mad2l1bp/mad2l1/ttk/spdl1/miip/cdc14b/ccnf/ndc80/mus81/ccna2/bub1/cdca5/dbf4/ube2s/dbf4b/cdc25b/bub3/cdc27/kntc1/wdr76	28
GO:1902850	GO:1902850	microtubule cytoskeleton organization involved in mitosis	22/255	85/18569	2.52182e-22	1.5257e-20	1.22109e-20	bora/tacc3/prc1a/prc1b/nusap1/kifc1/aurka/kif11/tpx2/plk1/kif23/zgc:86764/spdl1/aurkb/nuf2/racgap1/dlgap5/ndc80/gpsm2/ckap5/nde1/cenph	22
GO:0007051	GO:0007051	spindle organization	21/255	90/18569	2.49438e-20	1.42967e-18	1.14424e-18	bora/aspm/tacc3/prc1a/prc1b/kifc1/aurka/kif11/tpx2/plk1/kif23/zgc:86764/knstrn/aurkb/nuf2/racgap1/dlgap5/ndc80/ckap5/haus4/cenph	21
GO:0007052	GO:0007052	mitotic spindle organization	18/255	60/18569	9.12693e-20	4.96961e-18	3.97742e-18	bora/tacc3/prc1a/prc1b/kifc1/aurka/kif11/tpx2/plk1/kif23/zgc:86764/aurkb/nuf2/racgap1/dlgap5/ndc80/ckap5/cenph	18
GO:0044772	GO:0044772	mitotic cell cycle phase transition	23/255	125/18569	1.18669e-19	6.15382e-18	4.9252e-18	ccnb1/ccnb3/cdk1/cenpf/bub1bb/ccnb2/bub1ba/mad2l1bp/mad2l1/ttk/spdl1/miip/cdc14b/ccnf/ndc80/ccna2/bub1/cdca5/ube2s/cdc25b/bub3/cdc27/kntc1	23
GO:0006338	GO:0006338	chromatin remodeling	27/255	217/18569	2.72087e-18	1.34683e-16	1.07793e-16	oip5/cenpi/hist1h2a4/hist1h2a1/zgc:153405/si:dkey-108k21.21/si:ch211-113a14.24/zgc:110425/si:dkey-108k21.10/hist1h2a3/mis18a/si:dkey-108k21.19/hist1h2a5/si:dkey-23a13.9/cenpn/si:dkey-23a13.17/si:ch211-113a14.18/si:ch73-368j24.12/si:dkey-261m9.12/lmnb1/zgc:163040/h2ax/h2ax1/ddx39ab/seta/h2az2b/setb	27
GO:0006325	GO:0006325	chromatin organization	31/255	337/18569	5.06453e-17	2.39794e-15	1.91919e-15	oip5/cenpi/hist1h2a4/hist1h2a1/zgc:153405/si:dkey-108k21.21/si:ch211-113a14.24/zgc:110425/si:dkey-108k21.10/hist1h2a3/mis18a/si:dkey-108k21.19/hist1h2a5/si:dkey-23a13.9/cenpn/si:dkey-23a13.17/si:ch211-113a14.18/si:ch73-368j24.12/si:dkey-261m9.12/lmnb1/zgc:163040/h2ax/h2ax1/dek/hmgn2/cbx3a/ddx39ab/seta/banf1/h2az2b/setb	31
GO:0034508	GO:0034508	centromere complex assembly	11/255	18/18569	7.71733e-17	3.50174e-15	2.80261e-15	cenpt/oip5/cenpi/dlgap5/mis18a/cenpk/cenpn/kntc1/cenpw/cenpx/cenph	11
GO:1901987	GO:1901987	regulation of cell cycle phase transition	21/255	132/18569	1.09431e-16	4.76682e-15	3.81511e-15	fam83d/cdk1/cenpf/bub1bb/bub1ba/mad2l1bp/mad2l1/ttk/spdl1/miip/cdc14b/ndc80/mus81/bub1/cdca5/dbf4/dbf4b/cdc25b/bub3/kntc1/wdr76	21
GO:0051053	GO:0051053	negative regulation of DNA metabolic process	14/255	44/18569	4.72601e-16	1.97947e-14	1.58426e-14	parpbp/zgc:153405/si:dkey-108k21.21/pot1/si:ch211-113a14.24/zgc:110425/si:dkey-108k21.10/si:dkey-23a13.9/si:dkey-23a13.17/si:ch211-113a14.18/si:ch73-368j24.12/si:dkey-261m9.12/si:dkey-108k21.14/rnf169	14
GO:0051983	GO:0051983	regulation of chromosome segregation	13/255	35/18569	5.13238e-16	2.07006e-14	1.65677e-14	bub1bb/bub1ba/mki67/mad2l1/ttk/spdl1/si:ch211-244o22.2/gcna/ndc80/bub1/bub3/cdc27/kntc1	13
GO:0007088	GO:0007088	regulation of mitotic nuclear division	13/255	36/18569	7.93603e-16	3.08655e-14	2.47031e-14	bora/bub1bb/bub1ba/mki67/mad2l1/ttk/spdl1/si:ch211-244o22.2/ndc80/bub1/fbxo5/bub3/kntc1	13
GO:0051303	GO:0051303	establishment of chromosome localization	12/255	29/18569	1.46485e-15	5.50077e-14	4.40253e-14	fam83d/ccnb1/cenpf/knstrn/spdl1/nuf2/knl1/si:dkey-25o16.4/ndc80/ska1/cdca5/nde1	12
GO:0045910	GO:0045910	negative regulation of DNA recombination	12/255	30/18569	2.41192e-15	8.47285e-14	6.78123e-14	parpbp/zgc:153405/si:dkey-108k21.21/si:ch211-113a14.24/zgc:110425/si:dkey-108k21.10/si:dkey-23a13.9/si:dkey-23a13.17/si:ch211-113a14.18/si:ch73-368j24.12/si:dkey-261m9.12/si:dkey-108k21.14	12
GO:0050000	GO:0050000	chromosome localization	12/255	30/18569	2.41192e-15	8.47285e-14	6.78123e-14	fam83d/ccnb1/cenpf/knstrn/spdl1/nuf2/knl1/si:dkey-25o16.4/ndc80/ska1/cdca5/nde1	12
GO:0051310	GO:0051310	metaphase chromosome alignment	11/255	23/18569	3.08598e-15	1.0502e-13	8.40522e-14	fam83d/ccnb1/cenpf/knstrn/spdl1/nuf2/knl1/si:dkey-25o16.4/ndc80/ska1/cdca5	11
GO:0006334	GO:0006334	nucleosome assembly	13/255	41/18569	5.69381e-15	1.87896e-13	1.50382e-13	zgc:153405/si:dkey-108k21.21/si:ch211-113a14.24/zgc:110425/si:dkey-108k21.10/si:dkey-23a13.9/si:dkey-23a13.17/si:ch211-113a14.18/si:ch73-368j24.12/si:dkey-261m9.12/zgc:163040/seta/setb	13
GO:0051783	GO:0051783	regulation of nuclear division	13/255	42/18569	8.14638e-15	2.60924e-13	2.0883e-13	bora/bub1bb/bub1ba/mki67/mad2l1/ttk/spdl1/si:ch211-244o22.2/ndc80/bub1/fbxo5/bub3/kntc1	13
GO:0051304	GO:0051304	chromosome separation	11/255	26/18569	1.70045e-14	5.29083e-13	4.2345e-13	bub1bb/bub1ba/mad2l1/ttk/espl1/spdl1/ndc80/bub1/bub3/kntc1/ncaph2	11
GO:0045839	GO:0045839	negative regulation of mitotic nuclear division	10/255	20/18569	3.27443e-14	9.90514e-13	7.92756e-13	bub1bb/bub1ba/mad2l1/ttk/spdl1/ndc80/bub1/fbxo5/bub3/kntc1	10
GO:0034728	GO:0034728	nucleosome organization	13/255	47/18569	4.22554e-14	1.24368e-12	9.95377e-13	zgc:153405/si:dkey-108k21.21/si:ch211-113a14.24/zgc:110425/si:dkey-108k21.10/si:dkey-23a13.9/si:dkey-23a13.17/si:ch211-113a14.18/si:ch73-368j24.12/si:dkey-261m9.12/zgc:163040/seta/setb	13
GO:0051052	GO:0051052	regulation of DNA metabolic process	17/255	104/18569	6.09905e-14	1.62806e-12	1.30302e-12	parpbp/dbf4/zgc:153405/si:dkey-108k21.21/pot1/si:ch211-113a14.24/dbf4b/zgc:110425/si:dkey-108k21.10/si:dkey-23a13.9/si:dkey-23a13.17/si:ch211-113a14.18/si:ch73-368j24.12/si:dkey-261m9.12/si:dkey-108k21.14/rnf169/dek	17
GO:0051306	GO:0051306	mitotic sister chromatid separation	10/255	21/18569	6.1762e-14	1.62806e-12	1.30302e-12	bub1bb/bub1ba/mad2l1/ttk/spdl1/ndc80/bub1/bub3/kntc1/ncaph2	10
GO:0007094	GO:0007094	mitotic spindle assembly checkpoint signaling	9/255	15/18569	7.02653e-14	1.62806e-12	1.30302e-12	bub1bb/bub1ba/mad2l1/ttk/spdl1/ndc80/bub1/bub3/kntc1	9
GO:0031577	GO:0031577	spindle checkpoint signaling	9/255	15/18569	7.02653e-14	1.62806e-12	1.30302e-12	bub1bb/bub1ba/mad2l1/ttk/spdl1/ndc80/bub1/bub3/kntc1	9
GO:0033046	GO:0033046	negative regulation of sister chromatid segregation	9/255	15/18569	7.02653e-14	1.62806e-12	1.30302e-12	bub1bb/bub1ba/mad2l1/ttk/spdl1/ndc80/bub1/bub3/kntc1	9
GO:0033048	GO:0033048	negative regulation of mitotic sister chromatid segregation	9/255	15/18569	7.02653e-14	1.62806e-12	1.30302e-12	bub1bb/bub1ba/mad2l1/ttk/spdl1/ndc80/bub1/bub3/kntc1	9
GO:0045841	GO:0045841	negative regulation of mitotic metaphase/anaphase transition	9/255	15/18569	7.02653e-14	1.62806e-12	1.30302e-12	bub1bb/bub1ba/mad2l1/ttk/spdl1/ndc80/bub1/bub3/kntc1	9
GO:0071173	GO:0071173	spindle assembly checkpoint signaling	9/255	15/18569	7.02653e-14	1.62806e-12	1.30302e-12	bub1bb/bub1ba/mad2l1/ttk/spdl1/ndc80/bub1/bub3/kntc1	9
GO:0071174	GO:0071174	mitotic spindle checkpoint signaling	9/255	15/18569	7.02653e-14	1.62806e-12	1.30302e-12	bub1bb/bub1ba/mad2l1/ttk/spdl1/ndc80/bub1/bub3/kntc1	9
GO:2000816	GO:2000816	negative regulation of mitotic sister chromatid separation	9/255	15/18569	7.02653e-14	1.62806e-12	1.30302e-12	bub1bb/bub1ba/mad2l1/ttk/spdl1/ndc80/bub1/bub3/kntc1	9
GO:0007346	GO:0007346	regulation of mitotic cell cycle	25/255	274/18569	7.63403e-14	1.73197e-12	1.38618e-12	bora/cdk1/cenpf/bub1bb/bub1ba/mad2l1bp/cks2/mki67/mad2l1/ttk/spdl1/si:ch211-244o22.2/miip/cdc14b/dlgap5/ndc80/mus81/bub1/cdca5/cks1b/cdc25b/fbxo5/bub3/kntc1/cenpw	25
GO:1901990	GO:1901990	regulation of mitotic cell cycle phase transition	16/255	90/18569	8.6662e-14	1.92602e-12	1.54149e-12	cdk1/cenpf/bub1bb/bub1ba/mad2l1bp/mad2l1/ttk/spdl1/miip/cdc14b/ndc80/bub1/cdca5/cdc25b/bub3/kntc1	16
GO:0000018	GO:0000018	regulation of DNA recombination	12/255	39/18569	9.77548e-14	2.1291e-12	1.70402e-12	parpbp/zgc:153405/si:dkey-108k21.21/si:ch211-113a14.24/zgc:110425/si:dkey-108k21.10/si:dkey-23a13.9/si:dkey-23a13.17/si:ch211-113a14.18/si:ch73-368j24.12/si:dkey-261m9.12/si:dkey-108k21.14	12
GO:0033047	GO:0033047	regulation of mitotic sister chromatid segregation	9/255	16/18569	1.58692e-13	3.20028e-12	2.56134e-12	bub1bb/bub1ba/mad2l1/ttk/spdl1/ndc80/bub1/bub3/kntc1	9
GO:0051985	GO:0051985	negative regulation of chromosome segregation	9/255	16/18569	1.58692e-13	3.20028e-12	2.56134e-12	bub1bb/bub1ba/mad2l1/ttk/spdl1/ndc80/bub1/bub3/kntc1	9
GO:1902100	GO:1902100	negative regulation of metaphase/anaphase transition of cell cycle	9/255	16/18569	1.58692e-13	3.20028e-12	2.56134e-12	bub1bb/bub1ba/mad2l1/ttk/spdl1/ndc80/bub1/bub3/kntc1	9
GO:1905819	GO:1905819	negative regulation of chromosome separation	9/255	16/18569	1.58692e-13	3.20028e-12	2.56134e-12	bub1bb/bub1ba/mad2l1/ttk/spdl1/ndc80/bub1/bub3/kntc1	9
GO:0006310	GO:0006310	DNA recombination	20/255	168/18569	1.79673e-13	3.51017e-12	2.80936e-12	parpbp/pif1/top2a/sfr1/mus81/zgc:153405/si:dkey-108k21.21/rad52/si:ch211-113a14.24/zgc:110425/si:dkey-108k21.10/si:dkey-23a13.9/si:dkey-23a13.17/si:ch211-113a14.18/si:ch73-368j24.12/si:dkey-261m9.12/cenpx/h2ax/si:dkey-108k21.14/rad21a	20
GO:0051383	GO:0051383	kinetochore organization	8/255	11/18569	1.80505e-13	3.51017e-12	2.80936e-12	cenpt/nuf2/dlgap5/cenpk/kntc1/cenpw/cenpx/cenph	8
GO:0007091	GO:0007091	metaphase/anaphase transition of mitotic cell cycle	10/255	25/18569	5.45405e-13	1.02404e-11	8.19592e-12	bub1bb/bub1ba/mad2l1/ttk/spdl1/ndc80/bub1/bub3/cdc27/kntc1	10
GO:0051784	GO:0051784	negative regulation of nuclear division	10/255	25/18569	5.45405e-13	1.02404e-11	8.19592e-12	bub1bb/bub1ba/mad2l1/ttk/spdl1/ndc80/bub1/fbxo5/bub3/kntc1	10
GO:0044784	GO:0044784	metaphase/anaphase transition of cell cycle	10/255	26/18569	8.75655e-13	1.61625e-11	1.29356e-11	bub1bb/bub1ba/mad2l1/ttk/spdl1/ndc80/bub1/bub3/cdc27/kntc1	10
GO:2001251	GO:2001251	negative regulation of chromosome organization	9/255	19/18569	1.23615e-12	2.24361e-11	1.79567e-11	bub1bb/bub1ba/mad2l1/ttk/spdl1/ndc80/bub1/bub3/kntc1	9
GO:1903046	GO:1903046	meiotic cell cycle process	14/255	74/18569	1.30037e-12	2.32148e-11	1.858e-11	aspm/aurka/top2a/ttk/espl1/sgo1/nuf2/mus81/ncapd2/pttg1/cdc25b/fbxo5/cenpx/ncaph2	14
GO:0033045	GO:0033045	regulation of sister chromatid segregation	10/255	28/18569	2.11181e-12	3.7093e-11	2.96873e-11	bub1bb/bub1ba/mad2l1/ttk/spdl1/ndc80/bub1/bub3/cdc27/kntc1	10
GO:0010965	GO:0010965	regulation of mitotic sister chromatid separation	9/255	20/18569	2.22075e-12	3.83872e-11	3.07231e-11	bub1bb/bub1ba/mad2l1/ttk/spdl1/ndc80/bub1/bub3/kntc1	9
GO:0051321	GO:0051321	meiotic cell cycle	15/255	97/18569	4.38047e-12	7.45364e-11	5.9655e-11	aspm/aurka/top2a/ttk/espl1/sgo1/nuf2/mus81/ncapd2/pttg1/cdc25b/fbxo5/cenpx/h2ax/ncaph2	15
GO:0030071	GO:0030071	regulation of mitotic metaphase/anaphase transition	9/255	22/18569	6.42099e-12	1.07576e-10	8.60985e-11	bub1bb/bub1ba/mad2l1/ttk/spdl1/ndc80/bub1/bub3/kntc1	9
GO:0051382	GO:0051382	kinetochore assembly	7/255	10/18569	9.82974e-12	1.62191e-10	1.29809e-10	cenpt/dlgap5/cenpk/kntc1/cenpw/cenpx/cenph	7
GO:1902099	GO:1902099	regulation of metaphase/anaphase transition of cell cycle	9/255	23/18569	1.04231e-11	1.66922e-10	1.33596e-10	bub1bb/bub1ba/mad2l1/ttk/spdl1/ndc80/bub1/bub3/kntc1	9
GO:1905818	GO:1905818	regulation of chromosome separation	9/255	23/18569	1.04231e-11	1.66922e-10	1.33596e-10	bub1bb/bub1ba/mad2l1/ttk/spdl1/ndc80/bub1/bub3/kntc1	9
GO:0010948	GO:0010948	negative regulation of cell cycle process	15/255	103/18569	1.07417e-11	1.69532e-10	1.35684e-10	cdk1/bub1bb/bub1ba/mad2l1/ttk/spdl1/miip/ccnf/ndc80/mus81/bub1/fbxo5/bub3/kntc1/wdr76	15
GO:0051656	GO:0051656	establishment of organelle localization	19/255	190/18569	1.67991e-11	2.61346e-10	2.09168e-10	fam83d/ccnb1/aspm/nusap1/cenpf/kif23/knstrn/spdl1/nuf2/knl1/si:dkey-25o16.4/ndc80/ska1/cdca5/gpsm2/nde1/lmnb1/xpo1b/ran	19
GO:0033044	GO:0033044	regulation of chromosome organization	11/255	51/18569	7.74334e-11	1.18768e-09	9.50554e-10	bub1bb/bub1ba/mad2l1/ttk/spdl1/ndc80/bub1/pot1/bub3/cdc27/kntc1	11
GO:1901991	GO:1901991	negative regulation of mitotic cell cycle phase transition	11/255	52/18569	9.70265e-11	1.46753e-09	1.17453e-09	cdk1/bub1bb/bub1ba/mad2l1/ttk/spdl1/miip/ndc80/bub1/bub3/kntc1	11
GO:0007093	GO:0007093	mitotic cell cycle checkpoint signaling	11/255	54/18569	1.50081e-10	2.23889e-09	1.79189e-09	cdk1/bub1bb/bub1ba/mad2l1/ttk/spdl1/ndc80/mus81/bub1/bub3/kntc1	11
GO:0045930	GO:0045930	negative regulation of mitotic cell cycle	13/255	88/18569	2.1893e-10	3.22182e-09	2.57858e-09	cdk1/bub1bb/bub1ba/mad2l1/ttk/spdl1/miip/ndc80/mus81/bub1/fbxo5/bub3/kntc1	13
GO:1901988	GO:1901988	negative regulation of cell cycle phase transition	13/255	89/18569	2.53278e-10	3.67759e-09	2.94336e-09	cdk1/bub1bb/bub1ba/mad2l1/ttk/spdl1/miip/ndc80/mus81/bub1/bub3/kntc1/wdr76	13
GO:0045786	GO:0045786	negative regulation of cell cycle	15/255	131/18569	3.56971e-10	5.11502e-09	4.0938e-09	cdk1/bub1bb/bub1ba/mad2l1/ttk/spdl1/miip/ccnf/ndc80/mus81/bub1/fbxo5/bub3/kntc1/wdr76	15
GO:0000075	GO:0000075	cell cycle checkpoint signaling	12/255	75/18569	4.21692e-10	5.96393e-09	4.77322e-09	cdk1/bub1bb/bub1ba/mad2l1/ttk/spdl1/ndc80/mus81/bub1/bub3/kntc1/wdr76	12
GO:0051231	GO:0051231	spindle elongation	6/255	10/18569	1.26842e-09	1.77092e-08	1.41735e-08	prc1a/prc1b/kif11/kif23/zgc:86764/racgap1	6
GO:0007080	GO:0007080	mitotic metaphase chromosome alignment	6/255	11/18569	2.75848e-09	3.80251e-08	3.04333e-08	ccnb1/spdl1/nuf2/ndc80/ska1/cdca5	6
GO:0051640	GO:0051640	organelle localization	19/255	262/18569	4.06449e-09	5.53279e-08	4.42816e-08	fam83d/ccnb1/aspm/nusap1/cenpf/kif23/knstrn/spdl1/nuf2/knl1/si:dkey-25o16.4/ndc80/ska1/cdca5/gpsm2/nde1/lmnb1/xpo1b/ran	19
GO:0019953	GO:0019953	sexual reproduction	19/255	278/18569	1.07253e-08	1.44196e-07	1.15407e-07	ccnb1/bmb/aspm/aurka/top2a/ttk/espl1/sgo1/nuf2/mus81/ncapd2/pttg1/cdc25b/fbxo5/nemp1/cenpx/vrk1/h2ax/ncaph2	19
GO:0008608	GO:0008608	attachment of spindle microtubules to kinetochore	6/255	14/18569	1.73194e-08	2.30011e-07	1.84088e-07	knstrn/nuf2/knl1/si:dkey-25o16.4/ndc80/ska1	6
GO:0140694	GO:0140694	non-membrane-bounded organelle assembly	18/255	257/18569	1.81229e-08	2.37781e-07	1.90308e-07	prc1a/prc1b/kifc1/kif11/kif23/cenpt/zgc:86764/racgap1/dlgap5/wdr62/plk4/cenpk/kntc1/cenpw/haus4/cenpx/cenph/ddx61	18
GO:0010639	GO:0010639	negative regulation of organelle organization	12/255	110/18569	3.71309e-08	4.81376e-07	3.85268e-07	bub1bb/bub1ba/mad2l1/ttk/spdl1/ccnf/ndc80/si:ch211-266i6.3/bub1/fbxo5/bub3/kntc1	12
GO:0090307	GO:0090307	mitotic spindle assembly	7/255	26/18569	4.46544e-08	5.72102e-07	4.57881e-07	prc1a/prc1b/kifc1/kif11/kif23/zgc:86764/racgap1	7
GO:0033043	GO:0033043	regulation of organelle organization	23/255	441/18569	4.83257e-08	6.11938e-07	4.89763e-07	bora/bub1bb/tpx2/bub1ba/ect2/mki67/mad2l1/ttk/spdl1/si:ch211-244o22.2/ccnf/ndc80/odf2b/si:ch211-266i6.3/ska1/bub1/odf2a/pot1/fbxo5/bub3/cdc27/kntc1/stmn1a	23
GO:0000281	GO:0000281	mitotic cytokinesis	8/255	41/18569	7.31944e-08	9.16192e-07	7.33272e-07	nusap1/ect2/kif23/aurkb/anln/racgap1/cep55l/fbxo5	8
GO:0070828	GO:0070828	heterochromatin organization	9/255	58/18569	8.93311e-08	1.09305e-06	8.74821e-07	hist1h2a4/hist1h2a1/hist1h2a3/si:dkey-108k21.19/hist1h2a5/lmnb1/h2ax/h2ax1/h2az2b	9
GO:0140013	GO:0140013	meiotic nuclear division	9/255	58/18569	8.93311e-08	1.09305e-06	8.74821e-07	top2a/ttk/espl1/sgo1/nuf2/mus81/pttg1/fbxo5/cenpx	9
GO:0051255	GO:0051255	spindle midzone assembly	5/255	10/18569	1.11884e-07	1.35379e-06	1.08351e-06	prc1a/prc1b/kif23/zgc:86764/racgap1	5
GO:0022414	GO:0022414	reproductive process	19/255	332/18569	1.79528e-07	2.14841e-06	1.71948e-06	ccnb1/bmb/aspm/aurka/top2a/ttk/espl1/sgo1/nuf2/mus81/ncapd2/pttg1/cdc25b/fbxo5/nemp1/cenpx/vrk1/h2ax/ncaph2	19
GO:0000003	GO:0000003	reproduction	19/255	335/18569	2.06314e-07	2.44213e-06	1.95455e-06	ccnb1/bmb/aspm/aurka/top2a/ttk/espl1/sgo1/nuf2/mus81/ncapd2/pttg1/cdc25b/fbxo5/nemp1/cenpx/vrk1/h2ax/ncaph2	19
GO:0051225	GO:0051225	spindle assembly	8/255	49/18569	3.14217e-07	3.67938e-06	2.94479e-06	prc1a/prc1b/kifc1/kif11/kif23/zgc:86764/racgap1/haus4	8
GO:0090068	GO:0090068	positive regulation of cell cycle process	7/255	38/18569	7.44344e-07	8.6233e-06	6.90164e-06	fam83d/cdc14b/ndc80/cdca5/dbf4/dbf4b/cdc25b	7
GO:0000910	GO:0000910	cytokinesis	10/255	96/18569	8.00633e-07	9.17778e-06	7.34542e-06	nusap1/aurka/ect2/kif23/aurkb/cdc14b/anln/racgap1/cep55l/fbxo5	10
GO:0045787	GO:0045787	positive regulation of cell cycle	7/255	42/18569	1.51841e-06	1.72245e-05	1.37856e-05	fam83d/cdc14b/ndc80/cdca5/dbf4/dbf4b/cdc25b	7
GO:0010458	GO:0010458	exit from mitosis	5/255	16/18569	1.81261e-06	2.03498e-05	1.62869e-05	mad2l1bp/ttk/cdc14b/cdca5/ube2s	5
GO:0031023	GO:0031023	microtubule organizing center organization	8/255	65/18569	2.91002e-06	3.23369e-05	2.58807e-05	aurka/ccnf/wdr62/plk4/ckap5/sdccag8/nde1/haus4	8
GO:0006998	GO:0006998	nuclear envelope organization	5/255	19/18569	4.66522e-06	5.13174e-05	4.10718e-05	bmb/tmpoa/lmnb1/reep3b/banf1	5
GO:0034502	GO:0034502	protein localization to chromosome	5/255	20/18569	6.15076e-06	6.69818e-05	5.36087e-05	ttk/spdl1/knl1/kntc1/vrk1	5
GO:0031468	GO:0031468	nuclear membrane reassembly	4/255	10/18569	6.83585e-06	7.37053e-05	5.89899e-05	bmb/tmpoa/reep3b/banf1	4
GO:0061640	GO:0061640	cytoskeleton-dependent cytokinesis	8/255	74/18569	7.81255e-06	8.34104e-05	6.67574e-05	nusap1/ect2/kif23/aurkb/anln/racgap1/cep55l/fbxo5	8
GO:0051129	GO:0051129	negative regulation of cellular component organization	12/255	188/18569	1.16758e-05	0.000123446	9.87995e-05	bub1bb/bub1ba/mad2l1/ttk/spdl1/ccnf/ndc80/si:ch211-266i6.3/bub1/fbxo5/bub3/kntc1	12
GO:0007098	GO:0007098	centrosome cycle	7/255	59/18569	1.5742e-05	0.000164837	0.000131927	aurka/ccnf/wdr62/ckap5/sdccag8/nde1/haus4	7
GO:0071763	GO:0071763	nuclear membrane organization	4/255	13/18569	2.25295e-05	0.000233663	0.000187012	bmb/tmpoa/reep3b/banf1	4
GO:0050830	GO:0050830	defense response to Gram-positive bacterium	5/255	27/18569	2.96065e-05	0.000304165	0.000243438	zgc:153631/hist1h2a1/si:dkey-23c22.5/hist1h2a3/h2ax1	5
GO:0007018	GO:0007018	microtubule-based movement	13/255	244/18569	3.45743e-05	0.000351882	0.000281628	kifc1/kif11/kif20a/cenpe/kif14/kif2c/kif23/kif20bb/kif22/kif18a/nde1/kif20ba/dynll1	13
GO:0000079	GO:0000079	regulation of cyclin-dependent protein serine/threonine kinase activity	5/255	28/18569	3.56408e-05	0.000352844	0.000282398	ccnb1/ccnb3/ccnb2/ccnf/ccna2	5
GO:0045132	GO:0045132	meiotic chromosome segregation	5/255	28/18569	3.56408e-05	0.000352844	0.000282398	ttk/espl1/sgo1/nuf2/pttg1	5
GO:1904029	GO:1904029	regulation of cyclin-dependent protein kinase activity	5/255	28/18569	3.56408e-05	0.000352844	0.000282398	ccnb1/ccnb3/ccnb2/ccnf/ccna2	5
GO:0006974	GO:0006974	DNA damage response	18/255	438/18569	3.77583e-05	0.00037044	0.000296481	parpbp/pif1/kmt5ab/cdk1/sfr1/mus81/cdca5/neil3/rad52/poll/cenpx/vrk1/h2ax/rnf169/wdr76/dek/bcl2l16/rad21a	18
GO:0045934	GO:0045934	negative regulation of nucleobase-containing compound metabolic process	18/255	439/18569	3.88951e-05	0.000378185	0.00030268	parpbp/zgc:153405/si:dkey-108k21.21/pot1/si:ch211-113a14.24/zgc:110425/si:dkey-108k21.10/si:dkey-23a13.9/si:dkey-23a13.17/si:ch211-113a14.18/si:ch73-368j24.12/si:dkey-261m9.12/si:dkey-108k21.14/rnf169/znf503/hic1l/cbx3a/hnrnpa0b	18
GO:0031145	GO:0031145	anaphase-promoting complex-dependent catabolic process	4/255	15/18569	4.20891e-05	0.00040562	0.000324637	cdc20/ube2s/cdc27/fzr1a	4
GO:0051293	GO:0051293	establishment of spindle localization	5/255	34/18569	9.43486e-05	0.00089344	0.000715063	aspm/nusap1/spdl1/gpsm2/nde1	5
GO:0051653	GO:0051653	spindle localization	5/255	34/18569	9.43486e-05	0.00089344	0.000715063	aspm/nusap1/spdl1/gpsm2/nde1	5
GO:0006997	GO:0006997	nucleus organization	5/255	39/18569	0.000184606	0.00173307	0.00138706	bmb/tmpoa/lmnb1/reep3b/banf1	5
GO:0031109	GO:0031109	microtubule polymerization or depolymerization	6/255	61/18569	0.000186612	0.00173693	0.00139015	si:ch211-266i6.3/ska1/kif18a/ckap5/nde1/stmn1a	6
GO:0006302	GO:0006302	double-strand break repair	9/255	148/18569	0.000210532	0.00194296	0.00155504	parpbp/sfr1/mus81/cdca5/rad52/poll/rnf169/dek/rad21a	9
GO:0032506	GO:0032506	cytokinetic process	4/255	23/18569	0.000250422	0.00229168	0.00183414	ect2/kif23/aurkb/anln	4
GO:0003407	GO:0003407	neural retina development	8/255	123/18569	0.000299831	0.00272097	0.00217772	nek2/cdk1/foxn4/pcdh17/marcksa/marcksb/uba2/ran	8
GO:0044091	GO:0044091	membrane biogenesis	4/255	25/18569	0.000350112	0.00312518	0.00250123	bmb/tmpoa/reep3b/banf1	4
GO:0071709	GO:0071709	membrane assembly	4/255	25/18569	0.000350112	0.00312518	0.00250123	bmb/tmpoa/reep3b/banf1	4
GO:0040001	GO:0040001	establishment of mitotic spindle localization	4/255	27/18569	0.000475373	0.00420879	0.00336849	nusap1/spdl1/gpsm2/nde1	4
GO:0000712	GO:0000712	resolution of meiotic recombination intermediates	3/255	12/18569	0.000513727	0.00451168	0.00361091	top2a/mus81/cenpx	3
GO:0061982	GO:0061982	meiosis I cell cycle process	5/255	51/18569	0.000658826	0.0057397	0.00459375	top2a/mus81/pttg1/cdc25b/cenpx	5
GO:0060041	GO:0060041	retina development in camera-type eye	12/255	291/18569	0.000725953	0.00627431	0.00502163	nek2/cdk1/foxn4/plk1/sgo1/ccna2/pcdh17/arl6ip1/marcksa/marcksb/uba2/ran	12
GO:0006281	GO:0006281	DNA repair	13/255	335/18569	0.000775553	0.00665021	0.00532249	parpbp/pif1/sfr1/mus81/cdca5/neil3/rad52/poll/cenpx/h2ax/rnf169/dek/rad21a	13
GO:0007062	GO:0007062	sister chromatid cohesion	4/255	31/18569	0.000816377	0.00694558	0.00555888	bub1ba/bub1/cdca5/rad21a	4
GO:0010389	GO:0010389	regulation of G2/M transition of mitotic cell cycle	4/255	34/18569	0.00116509	0.00983549	0.00787181	cdk1/cenpf/miip/cdc25b	4
GO:0051445	GO:0051445	regulation of meiotic cell cycle	3/255	16/18569	0.00125558	0.0105179	0.00841798	ttk/cdc25b/fbxo5	3
GO:0000086	GO:0000086	G2/M transition of mitotic cell cycle	4/255	38/18569	0.00177654	0.0146564	0.0117302	cdk1/cenpf/miip/cdc25b	4
GO:1902749	GO:1902749	regulation of cell cycle G2/M phase transition	4/255	38/18569	0.00177654	0.0146564	0.0117302	cdk1/cenpf/miip/cdc25b	4
GO:1901989	GO:1901989	positive regulation of cell cycle phase transition	3/255	18/18569	0.00179283	0.0146796	0.0117488	fam83d/cdca5/cdc25b	3
GO:0048592	GO:0048592	eye morphogenesis	10/255	242/18569	0.00195319	0.0158141	0.0126568	nek2/cdk1/foxn4/poc5/kif22/pcdh17/arl6ip1/marcksa/znf503/marcksb	10
GO:0033365	GO:0033365	protein localization to organelle	12/255	327/18569	0.00196043	0.0158141	0.0126568	fam83d/kpna2/ttk/spdl1/knl1/odf2a/kntc1/lmnb1/vrk1/arf6a/tram1/ran	12
GO:0060042	GO:0060042	retina morphogenesis in camera-type eye	7/255	129/18569	0.00204831	0.0164016	0.0131269	nek2/cdk1/foxn4/pcdh17/arl6ip1/marcksa/marcksb	7
GO:0071900	GO:0071900	regulation of protein serine/threonine kinase activity	5/255	66/18569	0.00212188	0.0168666	0.0134991	ccnb1/ccnb3/ccnb2/ccnf/ccna2	5
GO:0044839	GO:0044839	cell cycle G2/M phase transition	4/255	42/18569	0.00258092	0.0203668	0.0163006	cdk1/cenpf/miip/cdc25b	4
GO:0070507	GO:0070507	regulation of microtubule cytoskeleton organization	5/255	72/18569	0.00310857	0.0243542	0.0194919	bora/tpx2/si:ch211-266i6.3/ska1/stmn1a	5
GO:0000132	GO:0000132	establishment of mitotic spindle orientation	3/255	22/18569	0.00324928	0.0251526	0.0201308	spdl1/gpsm2/nde1	3
GO:0031399	GO:0031399	regulation of protein modification process	10/255	260/18569	0.00327717	0.0251526	0.0201308	ccnb1/ccnb3/bora/birc5a/ccnb2/zgc:153631/ccnf/ccna2/si:dkey-23c22.5/arpp19b	10
GO:0032886	GO:0032886	regulation of microtubule-based process	6/255	105/18569	0.00327977	0.0251526	0.0201308	bora/tpx2/ccnf/si:ch211-266i6.3/ska1/stmn1a	6
GO:0007127	GO:0007127	meiosis I	4/255	46/18569	0.00360531	0.0274558	0.0219742	top2a/mus81/pttg1/cenpx	4
GO:0141060	GO:0141060	disruption of anatomical structure in another organism	3/255	23/18569	0.00369911	0.0279745	0.0223893	hist1h2a1/hist1h2a3/h2ax1	3
GO:0032465	GO:0032465	regulation of cytokinesis	3/255	24/18569	0.00418508	0.0312161	0.0249838	aurka/aurkb/cdc14b	3
GO:0051294	GO:0051294	establishment of spindle orientation	3/255	24/18569	0.00418508	0.0312161	0.0249838	spdl1/gpsm2/nde1	3
GO:0045859	GO:0045859	regulation of protein kinase activity	6/255	111/18569	0.00431202	0.0319442	0.0255665	ccnb1/ccnb3/bora/ccnb2/ccnf/ccna2	6
GO:0007019	GO:0007019	microtubule depolymerization	3/255	25/18569	0.00470803	0.0344097	0.0275398	si:ch211-266i6.3/kif18a/stmn1a	3
GO:2000779	GO:2000779	regulation of double-strand break repair	3/255	25/18569	0.00470803	0.0344097	0.0275398	parpbp/rnf169/dek	3
GO:0048593	GO:0048593	camera-type eye morphogenesis	8/255	195/18569	0.0056343	0.040905	0.0327383	nek2/cdk1/foxn4/pcdh17/arl6ip1/marcksa/znf503/marcksb	8
GO:0001932	GO:0001932	regulation of protein phosphorylation	8/255	201/18569	0.00672728	0.0485166	0.0388302	ccnb1/ccnb3/bora/ccnb2/zgc:153631/ccnf/ccna2/si:dkey-23c22.5	8
GO:0000724	GO:0000724	double-strand break repair via homologous recombination	5/255	89/18569	0.00764622	0.0547811	0.043844	parpbp/sfr1/mus81/rad52/rad21a	5
GO:0046642	GO:0046642	negative regulation of alpha-beta T cell proliferation	2/255	10/18569	0.00786051	0.0552264	0.0442003	zgc:153631/si:dkey-23c22.5	2
GO:0051447	GO:0051447	negative regulation of meiotic cell cycle	2/255	10/18569	0.00786051	0.0552264	0.0442003	ttk/fbxo5	2
GO:0060236	GO:0060236	regulation of mitotic spindle organization	2/255	10/18569	0.00786051	0.0552264	0.0442003	bora/tpx2	2
GO:0000725	GO:0000725	recombinational repair	5/255	90/18569	0.00800753	0.0558987	0.0447384	parpbp/sfr1/mus81/rad52/rad21a	5
GO:0042770	GO:0042770	signal transduction in response to DNA damage	4/255	58/18569	0.00824929	0.0572196	0.0457956	kmt5ab/cdk1/mus81/wdr76	4
GO:0007131	GO:0007131	reciprocal meiotic recombination	3/255	31/18569	0.00866192	0.059326	0.0474814	top2a/mus81/cenpx	3
GO:0140527	GO:0140527	reciprocal homologous recombination	3/255	31/18569	0.00866192	0.059326	0.0474814	top2a/mus81/cenpx	3
GO:0035825	GO:0035825	homologous recombination	3/255	32/18569	0.0094625	0.0624587	0.0499887	top2a/mus81/cenpx	3
GO:0042130	GO:0042130	negative regulation of T cell proliferation	3/255	32/18569	0.0094625	0.0624587	0.0499887	zgc:194627/zgc:153631/si:dkey-23c22.5	3
GO:0002720	GO:0002720	positive regulation of cytokine production involved in immune response	2/255	11/18569	0.00952079	0.0624587	0.0499887	zgc:153631/si:dkey-23c22.5	2
GO:0036089	GO:0036089	cleavage furrow formation	2/255	11/18569	0.00952079	0.0624587	0.0499887	kif23/aurkb	2
GO:0045738	GO:0045738	negative regulation of DNA repair	2/255	11/18569	0.00952079	0.0624587	0.0499887	parpbp/rnf169	2
GO:0090224	GO:0090224	regulation of spindle organization	2/255	11/18569	0.00952079	0.0624587	0.0499887	bora/tpx2	2
GO:2000780	GO:2000780	negative regulation of double-strand break repair	2/255	11/18569	0.00952079	0.0624587	0.0499887	parpbp/rnf169	2
GO:0032945	GO:0032945	negative regulation of mononuclear cell proliferation	3/255	33/18569	0.0103048	0.0664022	0.0531448	zgc:194627/zgc:153631/si:dkey-23c22.5	3
GO:0050672	GO:0050672	negative regulation of lymphocyte proliferation	3/255	33/18569	0.0103048	0.0664022	0.0531448	zgc:194627/zgc:153631/si:dkey-23c22.5	3
GO:0070664	GO:0070664	negative regulation of leukocyte proliferation	3/255	33/18569	0.0103048	0.0664022	0.0531448	zgc:194627/zgc:153631/si:dkey-23c22.5	3
GO:0002367	GO:0002367	cytokine production involved in immune response	2/255	12/18569	0.0113222	0.0708614	0.0567137	zgc:153631/si:dkey-23c22.5	2
GO:0002718	GO:0002718	regulation of cytokine production involved in immune response	2/255	12/18569	0.0113222	0.0708614	0.0567137	zgc:153631/si:dkey-23c22.5	2
GO:0046633	GO:0046633	alpha-beta T cell proliferation	2/255	12/18569	0.0113222	0.0708614	0.0567137	zgc:153631/si:dkey-23c22.5	2
GO:0046640	GO:0046640	regulation of alpha-beta T cell proliferation	2/255	12/18569	0.0113222	0.0708614	0.0567137	zgc:153631/si:dkey-23c22.5	2
GO:0051642	GO:0051642	centrosome localization	2/255	12/18569	0.0113222	0.0708614	0.0567137	dlgap5/nde1	2
GO:0051338	GO:0051338	regulation of transferase activity	7/255	179/18569	0.0119897	0.0746099	0.0597139	ccnb1/ccnb3/bora/ccnb2/ccnf/ccna2/pot1	7
GO:0051298	GO:0051298	centrosome duplication	3/255	35/18569	0.0121163	0.0749697	0.0600019	ccnf/wdr62/ckap5	3
GO:0000054	GO:0000054	ribosomal subunit export from nucleus	2/255	13/18569	0.0132606	0.0796952	0.0637839	xpo1b/ran	2
GO:0007064	GO:0007064	mitotic sister chromatid cohesion	2/255	13/18569	0.0132606	0.0796952	0.0637839	cdca5/rad21a	2
GO:0033750	GO:0033750	ribosome localization	2/255	13/18569	0.0132606	0.0796952	0.0637839	xpo1b/ran	2
GO:0046636	GO:0046636	negative regulation of alpha-beta T cell activation	2/255	13/18569	0.0132606	0.0796952	0.0637839	zgc:153631/si:dkey-23c22.5	2
GO:0061842	GO:0061842	microtubule organizing center localization	2/255	13/18569	0.0132606	0.0796952	0.0637839	dlgap5/nde1	2
GO:0006260	GO:0006260	DNA replication	6/255	141/18569	0.0133191	0.0796952	0.0637839	pif1/dbf4/dbf4b/poll/cenpx/rrm1	6
GO:0042742	GO:0042742	defense response to bacterium	5/255	104/18569	0.0143728	0.0855298	0.0684536	zgc:153631/hist1h2a1/si:dkey-23c22.5/hist1h2a3/h2ax1	5
GO:0002702	GO:0002702	positive regulation of production of molecular mediator of immune response	2/255	14/18569	0.0153319	0.0897656	0.0718437	zgc:153631/si:dkey-23c22.5	2
GO:0035914	GO:0035914	skeletal muscle cell differentiation	2/255	14/18569	0.0153319	0.0897656	0.0718437	marcksa/marcksb	2
GO:2000404	GO:2000404	regulation of T cell migration	2/255	14/18569	0.0153319	0.0897656	0.0718437	zgc:153631/si:dkey-23c22.5	2
GO:0080135	GO:0080135	regulation of cellular response to stress	5/255	106/18569	0.0154962	0.0902428	0.0722257	parpbp/kmt5ab/rnf169/wdr76/dek	5
GO:0006282	GO:0006282	regulation of DNA repair	3/255	40/18569	0.0173984	0.0979099	0.078362	parpbp/rnf169/dek	3
GO:0031110	GO:0031110	regulation of microtubule polymerization or depolymerization	3/255	40/18569	0.0173984	0.0979099	0.078362	si:ch211-266i6.3/ska1/stmn1a	3
GO:0050868	GO:0050868	negative regulation of T cell activation	3/255	40/18569	0.0173984	0.0979099	0.078362	zgc:194627/zgc:153631/si:dkey-23c22.5	3
GO:1903038	GO:1903038	negative regulation of leukocyte cell-cell adhesion	3/255	40/18569	0.0173984	0.0979099	0.078362	zgc:194627/zgc:153631/si:dkey-23c22.5	3
GO:0002700	GO:0002700	regulation of production of molecular mediator of immune response	2/255	15/18569	0.0175321	0.0979099	0.078362	zgc:153631/si:dkey-23c22.5	2
GO:0009262	GO:0009262	deoxyribonucleotide metabolic process	2/255	15/18569	0.0175321	0.0979099	0.078362	rrm1/dut	2
GO:1901992	GO:1901992	positive regulation of mitotic cell cycle phase transition	2/255	15/18569	0.0175321	0.0979099	0.078362	cdca5/cdc25b	2
GO:2000401	GO:2000401	regulation of lymphocyte migration	2/255	15/18569	0.0175321	0.0979099	0.078362	zgc:153631/si:dkey-23c22.5	2
GO:0090596	GO:0090596	sensory organ morphogenesis	10/255	335/18569	0.0177825	0.0988019	0.0790759	nek2/cdk1/foxn4/poc5/kif22/pcdh17/arl6ip1/marcksa/znf503/marcksb	10
GO:0060219	GO:0060219	camera-type eye photoreceptor cell differentiation	3/255	41/18569	0.0185856	0.10274	0.0822275	nek2/cdk1/pcdh17	3
GO:0043010	GO:0043010	camera-type eye development	13/255	495/18569	0.019704	0.106525	0.0852571	nek2/cdk1/foxn4/plk1/sgo1/ccna2/pcdh17/arl6ip1/marcksa/znf503/marcksb/uba2/ran	13
GO:0051250	GO:0051250	negative regulation of lymphocyte activation	3/255	42/18569	0.0198167	0.106525	0.0852571	zgc:194627/zgc:153631/si:dkey-23c22.5	3
GO:0006613	GO:0006613	cotranslational protein targeting to membrane	2/255	16/18569	0.0198573	0.106525	0.0852571	arl6ip1/tram1	2
GO:0045931	GO:0045931	positive regulation of mitotic cell cycle	2/255	16/18569	0.0198573	0.106525	0.0852571	cdca5/cdc25b	2
GO:0046634	GO:0046634	regulation of alpha-beta T cell activation	2/255	16/18569	0.0198573	0.106525	0.0852571	zgc:153631/si:dkey-23c22.5	2
GO:0072698	GO:0072698	protein localization to microtubule cytoskeleton	2/255	16/18569	0.0198573	0.106525	0.0852571	fam83d/odf2a	2
GO:0000077	GO:0000077	DNA damage checkpoint signaling	3/255	43/18569	0.0210918	0.111388	0.0891495	cdk1/mus81/wdr76	3
GO:0042129	GO:0042129	regulation of T cell proliferation	3/255	43/18569	0.0210918	0.111388	0.0891495	zgc:194627/zgc:153631/si:dkey-23c22.5	3
GO:0006913	GO:0006913	nucleocytoplasmic transport	5/255	115/18569	0.0212753	0.111388	0.0891495	kpna2/anp32a/xpo1b/ddx39ab/ran	5
GO:0046530	GO:0046530	photoreceptor cell differentiation	5/255	115/18569	0.0212753	0.111388	0.0891495	nek2/cdk1/si:ch211-185a18.2/poc5/pcdh17	5
GO:0051169	GO:0051169	nuclear transport	5/255	115/18569	0.0212753	0.111388	0.0891495	kpna2/anp32a/xpo1b/ddx39ab/ran	5
GO:0001754	GO:0001754	eye photoreceptor cell differentiation	4/255	77/18569	0.0215265	0.112164	0.0897704	nek2/cdk1/poc5/pcdh17	4
GO:0033260	GO:0033260	nuclear DNA replication	2/255	17/18569	0.0223037	0.115112	0.09213	dbf4/dbf4b	2
GO:0072678	GO:0072678	T cell migration	2/255	17/18569	0.0223037	0.115112	0.09213	zgc:153631/si:dkey-23c22.5	2
GO:0042098	GO:0042098	T cell proliferation	3/255	45/18569	0.0237741	0.122123	0.0977405	zgc:194627/zgc:153631/si:dkey-23c22.5	3
GO:0044380	GO:0044380	protein localization to cytoskeleton	2/255	18/18569	0.0248675	0.123524	0.0988622	fam83d/odf2a	2
GO:0047496	GO:0047496	vesicle transport along microtubule	2/255	18/18569	0.0248675	0.123524	0.0988622	kif23/nde1	2
GO:0060221	GO:0060221	retinal rod cell differentiation	2/255	18/18569	0.0248675	0.123524	0.0988622	nek2/cdk1	2
GO:0071675	GO:0071675	regulation of mononuclear cell migration	2/255	18/18569	0.0248675	0.123524	0.0988622	zgc:153631/si:dkey-23c22.5	2
GO:0019220	GO:0019220	regulation of phosphate metabolic process	9/255	304/18569	0.0250271	0.123524	0.0988622	ccnb1/ccnb3/bora/ccnb2/zgc:153631/ccnf/ccna2/si:dkey-23c22.5/arpp19b	9
GO:0051174	GO:0051174	regulation of phosphorus metabolic process	9/255	304/18569	0.0250271	0.123524	0.0988622	ccnb1/ccnb3/bora/ccnb2/zgc:153631/ccnf/ccna2/si:dkey-23c22.5/arpp19b	9
GO:0010842	GO:0010842	retina layer formation	3/255	46/18569	0.0251812	0.123524	0.0988622	foxn4/marcksa/marcksb	3
GO:0032944	GO:0032944	regulation of mononuclear cell proliferation	3/255	46/18569	0.0251812	0.123524	0.0988622	zgc:194627/zgc:153631/si:dkey-23c22.5	3
GO:0050670	GO:0050670	regulation of lymphocyte proliferation	3/255	46/18569	0.0251812	0.123524	0.0988622	zgc:194627/zgc:153631/si:dkey-23c22.5	3
GO:0070663	GO:0070663	regulation of leukocyte proliferation	3/255	46/18569	0.0251812	0.123524	0.0988622	zgc:194627/zgc:153631/si:dkey-23c22.5	3
GO:0001817	GO:0001817	regulation of cytokine production	4/255	82/18569	0.026399	0.12833	0.102709	zgc:153631/si:dkey-23c22.5/hic1l/banf1	4
GO:0002695	GO:0002695	negative regulation of leukocyte activation	3/255	47/18569	0.0266323	0.12833	0.102709	zgc:194627/zgc:153631/si:dkey-23c22.5	3
GO:0031570	GO:0031570	DNA integrity checkpoint signaling	3/255	47/18569	0.0266323	0.12833	0.102709	cdk1/mus81/wdr76	3
GO:0050866	GO:0050866	negative regulation of cell activation	3/255	47/18569	0.0266323	0.12833	0.102709	zgc:194627/zgc:153631/si:dkey-23c22.5	3
GO:0044786	GO:0044786	cell cycle DNA replication	2/255	19/18569	0.0275452	0.132144	0.105761	dbf4/dbf4b	2
GO:2000116	GO:2000116	regulation of cysteine-type endopeptidase activity	3/255	48/18569	0.0281272	0.134344	0.107522	cenph/bcl2l16/rad21a	3
GO:0032943	GO:0032943	mononuclear cell proliferation	3/255	49/18569	0.0296659	0.139854	0.111932	zgc:194627/zgc:153631/si:dkey-23c22.5	3
GO:0046651	GO:0046651	lymphocyte proliferation	3/255	49/18569	0.0296659	0.139854	0.111932	zgc:194627/zgc:153631/si:dkey-23c22.5	3
GO:0051302	GO:0051302	regulation of cell division	3/255	49/18569	0.0296659	0.139854	0.111932	aurka/aurkb/cdc14b	3
GO:0018105	GO:0018105	peptidyl-serine phosphorylation	5/255	126/18569	0.0300434	0.140565	0.112501	ttk/mastl/pbk/pkn3/vrk1	5
GO:0043549	GO:0043549	regulation of kinase activity	6/255	170/18569	0.030171	0.140565	0.112501	ccnb1/ccnb3/bora/ccnb2/ccnf/ccna2	6
GO:0001556	GO:0001556	oocyte maturation	2/255	20/18569	0.0303331	0.140565	0.112501	ccnb1/nemp1	2
GO:0050829	GO:0050829	defense response to Gram-negative bacterium	2/255	20/18569	0.0303331	0.140565	0.112501	zgc:153631/si:dkey-23c22.5	2
GO:0070661	GO:0070661	leukocyte proliferation	3/255	50/18569	0.0312483	0.144192	0.115404	zgc:194627/zgc:153631/si:dkey-23c22.5	3
GO:0018209	GO:0018209	peptidyl-serine modification	5/255	128/18569	0.0318487	0.146343	0.117125	ttk/mastl/pbk/pkn3/vrk1	5
GO:0042325	GO:0042325	regulation of phosphorylation	8/255	268/18569	0.0322066	0.147366	0.117944	ccnb1/ccnb3/bora/ccnb2/zgc:153631/ccnf/ccna2/si:dkey-23c22.5	8
GO:0061351	GO:0061351	neural precursor cell proliferation	3/255	51/18569	0.0328742	0.149791	0.119885	melk/gas2l3/vrk1	3
GO:0045862	GO:0045862	positive regulation of proteolysis	4/255	88/18569	0.0330526	0.149976	0.120033	cdc20/fzr1a/bcl2l16/rad21a	4
GO:0002699	GO:0002699	positive regulation of immune effector process	2/255	21/18569	0.0332276	0.150145	0.120168	zgc:153631/si:dkey-23c22.5	2
GO:0051247	GO:0051247	positive regulation of protein metabolic process	8/255	270/18569	0.0334345	0.150455	0.120417	bora/cdc20/birc5a/zgc:153631/si:dkey-23c22.5/fzr1a/bcl2l16/rad21a	8
GO:0001816	GO:0001816	cytokine production	4/255	90/18569	0.0354687	0.158952	0.127217	zgc:153631/si:dkey-23c22.5/hic1l/banf1	4
GO:0006275	GO:0006275	regulation of DNA replication	2/255	22/18569	0.0362255	0.159715	0.127827	dbf4/dbf4b	2
GO:0046631	GO:0046631	alpha-beta T cell activation	2/255	22/18569	0.0362255	0.159715	0.127827	zgc:153631/si:dkey-23c22.5	2
GO:0060541	GO:0060541	respiratory system development	2/255	22/18569	0.0362255	0.159715	0.127827	marcksa/marcksb	2
GO:2000242	GO:2000242	negative regulation of reproductive process	2/255	22/18569	0.0362255	0.159715	0.127827	ttk/fbxo5	2
GO:0060271	GO:0060271	cilium assembly	9/255	330/18569	0.0391624	0.171967	0.137634	cenpf/si:ch211-185a18.2/cdc14b/odf2b/odf2a/plk4/pibf1/tubb4b/dynll1	9
GO:0098534	GO:0098534	centriole assembly	2/255	24/18569	0.0425176	0.18595	0.148825	wdr62/plk4	2
GO:0050790	GO:0050790	regulation of catalytic activity	12/255	498/18569	0.0429454	0.18707	0.149721	ccnb1/ccnb3/bora/ccnb2/ect2/ccnf/ccna2/pot1/cenph/rasgef1bb/bcl2l16/rad21a	12
GO:0007265	GO:0007265	Ras protein signal transduction	3/255	57/18569	0.043532	0.18812	0.150562	hrasa/rasgef1bb/rassf1	3
GO:0030010	GO:0030010	establishment of cell polarity	3/255	57/18569	0.043532	0.18812	0.150562	spdl1/gpsm2/nde1	3
GO:0010972	GO:0010972	negative regulation of G2/M transition of mitotic cell cycle	2/255	25/18569	0.0458054	0.194852	0.155949	cdk1/miip	2
GO:0032436	GO:0032436	positive regulation of proteasomal ubiquitin-dependent protein catabolic process	2/255	25/18569	0.0458054	0.194852	0.155949	cdc20/fzr1a	2
GO:0070192	GO:0070192	chromosome organization involved in meiotic cell cycle	2/255	25/18569	0.0458054	0.194852	0.155949	ncapd2/ncaph2	2
GO:0099518	GO:0099518	vesicle cytoskeletal trafficking	2/255	25/18569	0.0458054	0.194852	0.155949	kif23/nde1	2
GO:0031503	GO:0031503	protein-containing complex localization	4/255	100/18569	0.0490471	0.205214	0.164242	lmnb1/xpo1b/ran/dynll1	4
GO:0046785	GO:0046785	microtubule polymerization	2/255	26/18569	0.0491834	0.205214	0.164242	ckap5/nde1	2
GO:1902017	GO:1902017	regulation of cilium assembly	2/255	26/18569	0.0491834	0.205214	0.164242	odf2b/odf2a	2
GO:1902750	GO:1902750	negative regulation of cell cycle G2/M phase transition	2/255	26/18569	0.0491834	0.205214	0.164242	cdk1/miip	2
GO:2000060	GO:2000060	positive regulation of ubiquitin-dependent protein catabolic process	2/255	26/18569	0.0491834	0.205214	0.164242	cdc20/fzr1a	2
GO:0022411	GO:0022411	cellular component disassembly	6/255	193/18569	0.0506432	0.210498	0.168472	si:ch211-266i6.3/kif18a/nemp1/vrk1/stmn1a/dnajc17	6
GO:0044782	GO:0044782	cilium organization	9/255	349/18569	0.052408	0.217005	0.17368	cenpf/si:ch211-185a18.2/cdc14b/odf2b/odf2a/plk4/pibf1/tubb4b/dynll1	9
GO:0044773	GO:0044773	mitotic DNA damage checkpoint signaling	2/255	27/18569	0.0526487	0.217176	0.173816	cdk1/mus81	2
GO:0040029	GO:0040029	epigenetic regulation of gene expression	3/255	63/18569	0.0556965	0.227508	0.182086	lmnb1/ddx39ab/h2az2b	3
GO:0050731	GO:0050731	positive regulation of peptidyl-tyrosine phosphorylation	2/255	28/18569	0.0561981	0.227508	0.182086	zgc:153631/si:dkey-23c22.5	2
GO:0051896	GO:0051896	regulation of phosphatidylinositol 3-kinase/protein kinase B signal transduction	2/255	28/18569	0.0561981	0.227508	0.182086	pdgfrb/cep55l	2
GO:0072384	GO:0072384	organelle transport along microtubule	2/255	28/18569	0.0561981	0.227508	0.182086	kif23/nde1	2
GO:1901800	GO:1901800	positive regulation of proteasomal protein catabolic process	2/255	28/18569	0.0561981	0.227508	0.182086	cdc20/fzr1a	2
GO:0022408	GO:0022408	negative regulation of cell-cell adhesion	3/255	64/18569	0.0578655	0.233391	0.186794	zgc:194627/zgc:153631/si:dkey-23c22.5	3
GO:0002440	GO:0002440	production of molecular mediator of immune response	2/255	29/18569	0.0598287	0.238657	0.191009	zgc:153631/si:dkey-23c22.5	2
GO:0071103	GO:0071103	DNA conformation change	2/255	29/18569	0.0598287	0.238657	0.191009	pif1/top2a	2
GO:1903052	GO:1903052	positive regulation of proteolysis involved in protein catabolic process	2/255	29/18569	0.0598287	0.238657	0.191009	cdc20/fzr1a	2
GO:0034504	GO:0034504	protein localization to nucleus	3/255	65/18569	0.060074	0.238761	0.191092	kpna2/lmnb1/ran	3
GO:0010256	GO:0010256	endomembrane system organization	7/255	255/18569	0.0627685	0.248563	0.198937	bmb/tmpoa/lmnb1/vrk1/reep3b/tram1/banf1	7
GO:0002687	GO:0002687	positive regulation of leukocyte migration	2/255	30/18569	0.0635377	0.249793	0.199921	zgc:153631/si:dkey-23c22.5	2
GO:0044774	GO:0044774	mitotic DNA integrity checkpoint signaling	2/255	30/18569	0.0635377	0.249793	0.199921	cdk1/mus81	2

## Sheet: tab.go_DEG_Multi36_cluster5
36 hpf cl 5	ID	Description	GeneRatio	BgRatio	pvalue	p.adjust	qvalue	geneID	Count
GO:0009952	GO:0009952	anterior/posterior pattern specification	29/184	255/18569	1.60849e-22	1.87872e-19	1.4595e-19	hes2.2/her4.4/sulf1/her12/hoxd9a/hoxc9a/hoxc3a/hoxd3a/hoxb9a/hoxa9a/nr6a1b/hoxa9b/scube2/hoxc6a/hoxc6b/gli2a/hoxb6b/hey2/dld/efnb2a/hoxb7a/hoxb3a/btk/cav1/hoxa4a/dlc/ccdc80/hoxb4a/cap1	29
GO:0048514	GO:0048514	blood vessel morphogenesis	26/184	439/18569	2.39722e-13	1.39998e-10	1.08758e-10	sulf1/hoxc9a/gdf6a/notch3/scube2/vegfc/tspan18a/isl2a/hey2/colec12/efnb2a/loxl2b/mcamb/dll4/nrp1a/efnb2b/cxcr4a/meis1b/tnfrsf19/dlc/flt1/gng2/notch1b/igfbp7/nrp1b/nrarpa	26
GO:0001568	GO:0001568	blood vessel development	26/184	495/18569	3.70902e-12	1.44405e-09	1.12182e-09	sulf1/hoxc9a/gdf6a/notch3/scube2/vegfc/tspan18a/isl2a/hey2/colec12/efnb2a/loxl2b/mcamb/dll4/nrp1a/efnb2b/cxcr4a/meis1b/tnfrsf19/dlc/flt1/gng2/notch1b/igfbp7/nrp1b/nrarpa	26
GO:0001501	GO:0001501	skeletal system development	22/184	407/18569	1.11565e-10	3.2577e-08	2.53076e-08	hoxd9a/ndnf/hoxc9a/gdf6a/plxna3/hoxc3a/hoxd3a/hoxb9a/hoxa9a/fgfrl1b/hoxa9b/ostn/nr5a2/loxl2b/fgfr1b/hoxb3a/nrp1a/cxcr4a/meis1b/hoxa4a/hoxb4a/hapln3	22
GO:0002040	GO:0002040	sprouting angiogenesis	14/184	144/18569	1.71528e-10	4.0069e-08	3.11279e-08	scube2/vegfc/tspan18a/efnb2a/loxl2b/dll4/nrp1a/cxcr4a/tnfrsf19/flt1/gng2/igfbp7/nrp1b/nrarpa	14
GO:0045595	GO:0045595	regulation of cell differentiation	23/184	498/18569	8.97931e-10	1.74797e-07	1.35792e-07	hes2.2/her4.4/vox/her12/hoxc9a/gdf6a/plxna3/notch3/sema7a/sema3fb/gli2a/tmem119b/eve1/hey2/dld/metrnla/loxl2b/fgfr1b/sema3fa/ccn1l2/fosl2/hapln3/rbpms2b	23
GO:0048706	GO:0048706	embryonic skeletal system development	15/184	209/18569	2.67301e-09	4.4601e-07	3.46486e-07	hoxd9a/ndnf/hoxc9a/gdf6a/plxna3/hoxc3a/hoxd3a/hoxb9a/hoxa9a/hoxa9b/hoxb3a/cxcr4a/meis1b/hoxa4a/hoxb4a	15
GO:0035907	GO:0035907	dorsal aorta development	6/184	15/18569	4.0544e-09	5.91942e-07	4.59854e-07	notch3/hey2/dll4/meis1b/dlc/notch1b	6
GO:0001667	GO:0001667	ameboidal-type cell migration	16/184	252/18569	4.56222e-09	5.92075e-07	4.59957e-07	apoc1/vegfc/sema7a/fbln1/sema3fb/efnb2a/loxl2b/cxcr4b/sema3fa/dll4/nrp1a/cxcr4a/tagln2/nrp1b/nrarpa/cap1	16
GO:0048705	GO:0048705	skeletal system morphogenesis	15/184	224/18569	6.88351e-09	7.99618e-07	6.21189e-07	hoxd9a/ndnf/hoxc9a/plxna3/hoxc3a/hoxd3a/hoxb9a/hoxa9a/hoxa9b/ostn/hoxb3a/cxcr4a/meis1b/hoxa4a/hoxb4a	15
GO:0048704	GO:0048704	embryonic skeletal system morphogenesis	14/184	192/18569	7.53065e-09	7.99618e-07	6.21189e-07	hoxd9a/ndnf/hoxc9a/plxna3/hoxc3a/hoxd3a/hoxb9a/hoxa9a/hoxa9b/hoxb3a/cxcr4a/meis1b/hoxa4a/hoxb4a	14
GO:0007411	GO:0007411	axon guidance	16/184	269/18569	1.15601e-08	1.03863e-06	8.06867e-07	gdf6a/plxna3/vegfc/sema7a/sema3fb/gli2a/isl2a/efnb2a/efna5a/cxcr4b/sema3fa/nrp1a/efnb2b/dpysl3/nrp1b/rbpms2b	16
GO:0097485	GO:0097485	neuron projection guidance	16/184	269/18569	1.15601e-08	1.03863e-06	8.06867e-07	gdf6a/plxna3/vegfc/sema7a/sema3fb/gli2a/isl2a/efnb2a/efna5a/cxcr4b/sema3fa/nrp1a/efnb2b/dpysl3/nrp1b/rbpms2b	16
GO:0035904	GO:0035904	aorta development	6/184	18/18569	1.46708e-08	1.22397e-06	9.50846e-07	notch3/hey2/dll4/meis1b/dlc/notch1b	6
GO:0060841	GO:0060841	venous blood vessel development	6/184	19/18569	2.1266e-08	1.65591e-06	1.28641e-06	vegfc/tspan18a/isl2a/dll4/meis1b/flt1	6
GO:0043542	GO:0043542	endothelial cell migration	8/184	49/18569	2.54392e-08	1.85706e-06	1.44267e-06	vegfc/efnb2a/loxl2b/dll4/nrp1a/cxcr4a/tagln2/nrp1b	8
GO:0061053	GO:0061053	somite development	12/184	157/18569	5.45894e-08	3.75061e-06	2.91369e-06	sulf1/her12/notch3/scube2/gli2a/dld/efnb2a/cav1/cxcr4a/dlc/ccdc80/cap1	12
GO:0007409	GO:0007409	axonogenesis	19/184	437/18569	7.46551e-08	4.84429e-06	3.76332e-06	her4.4/gdf6a/plxna3/notch3/vegfc/sema7a/sema3fb/gli2a/isl2a/efnb2a/efna5a/cxcr4b/sema3fa/nrp1a/efnb2b/dpysl3/notch1b/nrp1b/rbpms2b	19
GO:0061564	GO:0061564	axon development	20/184	488/18569	8.7121e-08	5.14958e-06	4.00048e-06	her4.4/gdf6a/plxna3/notch3/vegfc/sema7a/sema3fb/gli2a/isl2a/efnb2a/efna5a/cxcr4b/mcamb/sema3fa/nrp1a/efnb2b/dpysl3/notch1b/nrp1b/rbpms2b	20
GO:0001525	GO:0001525	angiogenesis	17/184	353/18569	8.81777e-08	5.14958e-06	4.00048e-06	scube2/vegfc/tspan18a/efnb2a/loxl2b/mcamb/dll4/nrp1a/cxcr4a/meis1b/tnfrsf19/flt1/gng2/notch1b/igfbp7/nrp1b/nrarpa	17
GO:0060840	GO:0060840	artery development	7/184	39/18569	9.84547e-08	5.47596e-06	4.25403e-06	notch3/tspan18a/hey2/dll4/meis1b/dlc/notch1b	7
GO:0048812	GO:0048812	neuron projection morphogenesis	20/184	500/18569	1.29015e-07	6.62472e-06	5.14646e-06	her4.4/gdf6a/plxna3/notch3/vegfc/sema7a/sema3fb/gli2a/isl2a/efnb2a/efna5a/cxcr4b/sema3fa/nrp1a/efnb2b/dpysl3/notch1b/nrp1b/rbpms2b/tmem108	20
GO:0001756	GO:0001756	somitogenesis	10/184	109/18569	1.30453e-07	6.62472e-06	5.14646e-06	sulf1/her12/scube2/gli2a/dld/efnb2a/cav1/dlc/ccdc80/cap1	10
GO:0001570	GO:0001570	vasculogenesis	8/184	61/18569	1.50115e-07	7.30558e-06	5.67539e-06	sulf1/hoxc9a/hey2/colec12/nrp1a/cxcr4a/flt1/nrp1b	8
GO:2000026	GO:2000026	regulation of multicellular organismal development	19/184	459/18569	1.60236e-07	7.48625e-06	5.81574e-06	hes2.2/her4.4/her12/plxna3/notch3/vegfc/sema7a/tspan18a/sema3fb/gli2a/tmem119b/hey2/loxl2b/lrp1aa/sema3fa/dll4/meis1b/hapln3/bmp2k	19
GO:0048010	GO:0048010	vascular endothelial growth factor receptor signaling pathway	6/184	26/18569	1.70344e-07	7.6524e-06	5.94481e-06	vegfc/dll4/nrp1a/flt1/gng2/nrp1b	6
GO:0010631	GO:0010631	epithelial cell migration	8/184	63/18569	1.94121e-07	8.39751e-06	6.52366e-06	vegfc/efnb2a/loxl2b/dll4/nrp1a/cxcr4a/tagln2/nrp1b	8
GO:0048667	GO:0048667	cell morphogenesis involved in neuron differentiation	19/184	479/18569	3.0838e-07	1.27302e-05	9.88951e-06	her4.4/gdf6a/plxna3/notch3/vegfc/sema7a/sema3fb/gli2a/isl2a/efnb2a/efna5a/cxcr4b/sema3fa/nrp1a/efnb2b/dpysl3/notch1b/nrp1b/rbpms2b	19
GO:0090132	GO:0090132	epithelium migration	8/184	67/18569	3.16074e-07	1.27302e-05	9.88951e-06	vegfc/efnb2a/loxl2b/dll4/nrp1a/cxcr4a/tagln2/nrp1b	8
GO:0050920	GO:0050920	regulation of chemotaxis	8/184	70/18569	4.46052e-07	1.72971e-05	1.34374e-05	vegfc/sema7a/sema3fb/efnb2a/cxcr4b/sema3fa/nrp1a/rbpms2b	8
GO:0040012	GO:0040012	regulation of locomotion	14/184	267/18569	4.59084e-07	1.72971e-05	1.34374e-05	sulf1/plxna3/vegfc/sema7a/sema3fb/efnb2a/cxcr4b/sema3fa/dll4/nrp1a/tnfrsf19/cd99/nrp1b/rbpms2b	14
GO:0048863	GO:0048863	stem cell differentiation	14/184	269/18569	5.02268e-07	1.83328e-05	1.42419e-05	gata2b/tfap2c/sema7a/sema3fb/dld/nr5a2/sema3fa/nrp1a/cxcr4a/fosl2/dlc/notch1b/nrp1b/nrarpa	14
GO:0007169	GO:0007169	transmembrane receptor protein tyrosine kinase signaling pathway	15/184	315/18569	6.02386e-07	2.13208e-05	1.65632e-05	ntrk3b/sulf1/gdf6a/ddr1/vegfc/efnb2a/efna5a/fgfr1b/ghrb/dll4/nrp1a/efnb2b/flt1/gng2/nrp1b	15
GO:0035282	GO:0035282	segmentation	10/184	130/18569	6.81403e-07	2.29765e-05	1.78494e-05	sulf1/her12/scube2/gli2a/dld/efnb2a/cav1/dlc/ccdc80/cap1	10
GO:0090130	GO:0090130	tissue migration	8/184	74/18569	6.88507e-07	2.29765e-05	1.78494e-05	vegfc/efnb2a/loxl2b/dll4/nrp1a/cxcr4a/tagln2/nrp1b	8
GO:0050767	GO:0050767	regulation of neurogenesis	11/184	167/18569	8.85307e-07	2.87233e-05	2.23139e-05	hes2.2/her4.4/her12/plxna3/notch3/sema7a/sema3fb/gli2a/hey2/sema3fa/hapln3	11
GO:0048562	GO:0048562	embryonic organ morphogenesis	18/184	470/18569	1.06409e-06	3.35907e-05	2.60951e-05	hoxd9a/ndnf/hoxc9a/plxna3/hoxc3a/hoxd3a/hoxb9a/hoxa9a/hoxa9b/tfap2c/gli2a/efnb2a/hoxb3a/cxcr4a/meis1b/znf503/hoxa4a/hoxb4a	18
GO:0030334	GO:0030334	regulation of cell migration	12/184	230/18569	3.27688e-06	0.000100721	7.82458e-05	sulf1/plxna3/vegfc/sema7a/sema3fb/cxcr4b/sema3fa/dll4/nrp1a/tnfrsf19/cd99/nrp1b	12
GO:0051960	GO:0051960	regulation of nervous system development	11/184	193/18569	3.64576e-06	0.000109186	8.48217e-05	hes2.2/her4.4/her12/plxna3/notch3/sema7a/sema3fb/gli2a/hey2/sema3fa/hapln3	11
GO:0021514	GO:0021514	ventral spinal cord interneuron differentiation	5/184	25/18569	4.09235e-06	0.000119497	9.28317e-05	notch3/dld/dll4/dlc/notch1b	5
GO:0007219	GO:0007219	Notch signaling pathway	9/184	128/18569	5.24397e-06	0.000149389	0.000116054	her12/notch3/hey2/dld/dll4/dlc/notch1b/bmp2k/nrarpa	9
GO:0008283	GO:0008283	cell population proliferation	16/184	425/18569	5.39224e-06	0.000149956	0.000116494	gdf6a/vegfc/tfap2c/tmem119b/hey2/hoxb8a/loxl2b/fgfr1b/dll4/cav1/cxcr4a/meis1b/btg2/hapln3/junba/nrarpa	16
GO:0060485	GO:0060485	mesenchyme development	12/184	249/18569	7.38238e-06	0.000195969	0.000152239	notch3/tfap2c/sema7a/sema3fb/dld/loxl2b/sema3fa/nrp1a/cxcr4a/dlc/nrp1b/nrarpa	12
GO:2000145	GO:2000145	regulation of cell motility	12/184	249/18569	7.38238e-06	0.000195969	0.000152239	sulf1/plxna3/vegfc/sema7a/sema3fb/cxcr4b/sema3fa/dll4/nrp1a/tnfrsf19/cd99/nrp1b	12
GO:0001946	GO:0001946	lymphangiogenesis	6/184	50/18569	9.65254e-06	0.000250537	0.000194631	hoxc9a/vegfc/mcamb/dll4/cxcr4a/notch1b	6
GO:0001945	GO:0001945	lymph vessel development	7/184	76/18569	1.02784e-05	0.000255429	0.000198431	hoxc9a/vegfc/mcamb/dll4/cxcr4a/notch1b/junba	7
GO:0040013	GO:0040013	negative regulation of locomotion	7/184	76/18569	1.02784e-05	0.000255429	0.000198431	sulf1/sema7a/sema3fb/cxcr4b/sema3fa/dll4/tnfrsf19	7
GO:0036303	GO:0036303	lymph vessel morphogenesis	6/184	52/18569	1.21652e-05	0.00029602	0.000229965	hoxc9a/vegfc/mcamb/dll4/cxcr4a/notch1b	6
GO:0001763	GO:0001763	morphogenesis of a branching structure	5/184	31/18569	1.24716e-05	0.000297282	0.000230946	plxna3/vegfc/dll4/igfbp7/nrarpa	5
GO:0090497	GO:0090497	mesenchymal cell migration	8/184	109/18569	1.29262e-05	0.000301955	0.000234576	sema7a/fbln1/sema3fb/sema3fa/nrp1a/cxcr4a/nrp1b/nrarpa	8
GO:0040011	GO:0040011	locomotion	15/184	409/18569	1.4588e-05	0.000334093	0.000259542	sulf1/plxna3/vegfc/sema7a/sema3fb/efnb2a/cxcr4b/sema3fa/dll4/nrp1a/cxcr4a/tnfrsf19/cd99/nrp1b/rbpms2b	15
GO:0048936	GO:0048936	peripheral nervous system neuron axonogenesis	4/184	16/18569	1.54724e-05	0.000347535	0.000269985	her4.4/notch3/dpysl3/notch1b	4
GO:0040007	GO:0040007	growth	15/184	418/18569	1.88198e-05	0.000413886	0.00032153	hoxc13b/hoxc13a/plxna3/vegfc/sema7a/sema3fb/isl2a/hey2/cxcr4b/sema3fa/cav1/nrp1a/notch1b/igfbp7/tmem108	15
GO:0040017	GO:0040017	positive regulation of locomotion	8/184	115/18569	1.91351e-05	0.000413886	0.00032153	vegfc/sema7a/sema3fb/cxcr4b/sema3fa/nrp1a/cd99/nrp1b	8
GO:0001569	GO:0001569	branching involved in blood vessel morphogenesis	4/184	17/18569	2.00768e-05	0.000426358	0.000331219	vegfc/dll4/igfbp7/nrarpa	4
GO:0021517	GO:0021517	ventral spinal cord development	6/184	57/18569	2.08129e-05	0.000434097	0.000337231	notch3/gli2a/dld/dll4/dlc/notch1b	6
GO:0043534	GO:0043534	blood vessel endothelial cell migration	5/184	35/18569	2.30755e-05	0.00046471	0.000361013	vegfc/efnb2a/dll4/cxcr4a/nrp1b	5
GO:1990138	GO:1990138	neuron projection extension	8/184	118/18569	2.30763e-05	0.00046471	0.000361013	plxna3/sema7a/sema3fb/isl2a/cxcr4b/sema3fa/nrp1a/tmem108	8
GO:0045165	GO:0045165	cell fate commitment	10/184	194/18569	2.4372e-05	0.000482482	0.000374819	gata2b/vox/gdf6a/scube2/tfap2c/gli2a/eve1/isl2a/hey2/dld	10
GO:0038084	GO:0038084	vascular endothelial growth factor signaling pathway	4/184	18/18569	2.56135e-05	0.00049861	0.000387349	gdf6a/vegfc/nrp1a/nrp1b	4
GO:0022603	GO:0022603	regulation of anatomical structure morphogenesis	13/184	330/18569	2.63698e-05	0.000504916	0.000392247	vox/hoxc9a/plxna3/vegfc/sema7a/tspan18a/sema3fb/eve1/sema3fa/dll4/nrp1a/meis1b/dpysl3	13
GO:0016049	GO:0016049	cell growth	9/184	160/18569	3.15944e-05	0.000595198	0.000462384	plxna3/sema7a/sema3fb/isl2a/cxcr4b/sema3fa/nrp1a/igfbp7/tmem108	9
GO:0032101	GO:0032101	regulation of response to external stimulus	12/184	292/18569	3.59614e-05	0.000666661	0.0005179	ddr1/vegfc/sema7a/sema3fb/efnb2a/metrnla/cxcr4b/sema3fa/cav1/nrp1a/nrp1b/rbpms2b	12
GO:0010975	GO:0010975	regulation of neuron projection development	9/184	163/18569	3.65646e-05	0.000666661	0.0005179	ntrk3b/plxna3/ddr1/sema7a/sema3fb/sema3fa/nrp1a/dpysl3/rbpms2b	9
GO:0021515	GO:0021515	cell differentiation in spinal cord	6/184	63/18569	3.71002e-05	0.000666661	0.0005179	notch3/gli2a/dld/dll4/dlc/notch1b	6
GO:0048589	GO:0048589	developmental growth	14/184	392/18569	3.78897e-05	0.000670532	0.000520907	hoxc13b/hoxc13a/plxna3/vegfc/sema7a/sema3fb/isl2a/hey2/cxcr4b/sema3fa/cav1/nrp1a/notch1b/tmem108	14
GO:0035924	GO:0035924	cellular response to vascular endothelial growth factor stimulus	4/184	21/18569	4.89453e-05	0.000828523	0.000643643	gdf6a/vegfc/nrp1a/nrp1b	4
GO:0048934	GO:0048934	peripheral nervous system neuron differentiation	4/184	21/18569	4.89453e-05	0.000828523	0.000643643	her4.4/notch3/dpysl3/notch1b	4
GO:0048935	GO:0048935	peripheral nervous system neuron development	4/184	21/18569	4.89453e-05	0.000828523	0.000643643	her4.4/notch3/dpysl3/notch1b	4
GO:0048754	GO:0048754	branching morphogenesis of an epithelial tube	4/184	22/18569	5.93602e-05	0.000986974	0.000766737	vegfc/dll4/igfbp7/nrarpa	4
GO:0048588	GO:0048588	developmental cell growth	8/184	135/18569	6.05774e-05	0.000986974	0.000766737	plxna3/sema7a/sema3fb/isl2a/cxcr4b/sema3fa/nrp1a/tmem108	8
GO:0051093	GO:0051093	negative regulation of developmental process	9/184	174/18569	6.08409e-05	0.000986974	0.000766737	hoxc9a/gdf6a/notch3/sema7a/sema3fb/loxl2b/sema3fa/dll4/rbpms2b	9
GO:0048732	GO:0048732	gland development	11/184	264/18569	6.74865e-05	0.00107978	0.000838838	dnah7/notch3/gli2a/isl2a/hoxc8a/dld/nr5a2/tcf7l2/nrp1a/cebpa/xbp1	11
GO:0030335	GO:0030335	positive regulation of cell migration	7/184	103/18569	7.44254e-05	0.00117471	0.000912584	vegfc/sema7a/sema3fb/sema3fa/nrp1a/cd99/nrp1b	7
GO:0030198	GO:0030198	extracellular matrix organization	9/184	180/18569	7.90272e-05	0.00121059	0.000940458	sulf1/col8a2/ndnf/col18a1b/fbln1/loxl2b/postnb/ccdc80/tgfbi	9
GO:0043062	GO:0043062	extracellular structure organization	9/184	180/18569	7.90272e-05	0.00121059	0.000940458	sulf1/col8a2/ndnf/col18a1b/fbln1/loxl2b/postnb/ccdc80/tgfbi	9
GO:0051094	GO:0051094	positive regulation of developmental process	11/184	269/18569	7.9808e-05	0.00121059	0.000940458	hoxc9a/plxna3/vegfc/sema7a/tmem119b/metrnla/loxl2b/fgfr1b/ccn1l2/meis1b/hapln3	11
GO:0045229	GO:0045229	external encapsulating structure organization	9/184	181/18569	8.24626e-05	0.00123482	0.000959282	sulf1/col8a2/ndnf/col18a1b/fbln1/loxl2b/postnb/ccdc80/tgfbi	9
GO:0001935	GO:0001935	endothelial cell proliferation	5/184	46/18569	8.92152e-05	0.00131903	0.0010247	vegfc/loxl2b/dll4/cav1/nrarpa	5
GO:0001755	GO:0001755	neural crest cell migration	7/184	107/18569	9.47509e-05	0.0013713	0.0010653	sema7a/sema3fb/sema3fa/nrp1a/cxcr4a/nrp1b/nrarpa	7
GO:0120035	GO:0120035	regulation of plasma membrane bounded cell projection organization	10/184	228/18569	9.50985e-05	0.0013713	0.0010653	ntrk3b/plxna3/ddr1/sema7a/sema3fb/sema3fa/nrp1a/dpysl3/nrp1b/rbpms2b	10
GO:0061138	GO:0061138	morphogenesis of a branching epithelium	4/184	25/18569	0.000100296	0.001406	0.00109226	vegfc/dll4/igfbp7/nrarpa	4
GO:0048675	GO:0048675	axon extension	7/184	108/18569	0.000100481	0.001406	0.00109226	plxna3/sema7a/sema3fb/isl2a/cxcr4b/sema3fa/nrp1a	7
GO:0031344	GO:0031344	regulation of cell projection organization	10/184	230/18569	0.00010221	0.001406	0.00109226	ntrk3b/plxna3/ddr1/sema7a/sema3fb/sema3fa/nrp1a/dpysl3/nrp1b/rbpms2b	10
GO:0008015	GO:0008015	blood circulation	11/184	277/18569	0.000103524	0.001406	0.00109226	adrb3a/tnni4b.2/sulf1/notch3/scube2/gja5a/gli2a/flt1/ccdc80/junba/crip2	11
GO:0060284	GO:0060284	regulation of cell development	11/184	277/18569	0.000103524	0.001406	0.00109226	hes2.2/her4.4/her12/plxna3/notch3/sema7a/sema3fb/gli2a/hey2/sema3fa/hapln3	11
GO:0031290	GO:0031290	retinal ganglion cell axon guidance	5/184	48/18569	0.000109675	0.00144595	0.0011233	gdf6a/gli2a/cxcr4b/nrp1a/rbpms2b	5
GO:0014032	GO:0014032	neural crest cell development	8/184	147/18569	0.00011018	0.00144595	0.0011233	tfap2c/sema7a/sema3fb/sema3fa/nrp1a/cxcr4a/nrp1b/nrarpa	8
GO:0048864	GO:0048864	stem cell development	8/184	147/18569	0.00011018	0.00144595	0.0011233	tfap2c/sema7a/sema3fb/sema3fa/nrp1a/cxcr4a/nrp1b/nrarpa	8
GO:2000147	GO:2000147	positive regulation of cell motility	7/184	110/18569	0.000112787	0.00146373	0.0011371	vegfc/sema7a/sema3fb/sema3fa/nrp1a/cd99/nrp1b	7
GO:0048762	GO:0048762	mesenchymal cell differentiation	9/184	191/18569	0.000124289	0.00158752	0.00123328	tfap2c/sema7a/sema3fb/loxl2b/sema3fa/nrp1a/cxcr4a/nrp1b/nrarpa	9
GO:0003013	GO:0003013	circulatory system process	11/184	283/18569	0.000125045	0.00158752	0.00123328	adrb3a/tnni4b.2/sulf1/notch3/scube2/gja5a/gli2a/flt1/ccdc80/junba/crip2	11
GO:0045446	GO:0045446	endothelial cell differentiation	5/184	51/18569	0.000146893	0.00184485	0.00143318	notch3/hey2/meis1b/tnfrsf19/dlc	5
GO:0021654	GO:0021654	rhombomere boundary formation	3/184	12/18569	0.000197168	0.00244991	0.00190323	notch3/efnb2a/notch1b	3
GO:0045596	GO:0045596	negative regulation of cell differentiation	7/184	121/18569	0.000204287	0.00251166	0.0019512	hoxc9a/gdf6a/notch3/sema7a/sema3fb/sema3fa/rbpms2b	7
GO:0042127	GO:0042127	regulation of cell population proliferation	11/184	301/18569	0.000213882	0.00256596	0.00199338	gdf6a/vegfc/tfap2c/tmem119b/fgfr1b/dll4/cav1/meis1b/btg2/hapln3/junba	11
GO:0021953	GO:0021953	central nervous system neuron differentiation	7/184	122/18569	0.000214934	0.00256596	0.00199338	ndnf/notch3/gli2a/dld/dll4/dlc/notch1b	7
GO:0009611	GO:0009611	response to wounding	8/184	162/18569	0.000215295	0.00256596	0.00199338	vim/cxcr4b/mcamb/nrp1a/f13a1b/nrp1b/sdc4/rhocb	8
GO:0031346	GO:0031346	positive regulation of cell projection organization	6/184	87/18569	0.000226608	0.00267351	0.00207694	ntrk3b/plxna3/ddr1/sema7a/nrp1a/nrp1b	6
GO:0014033	GO:0014033	neural crest cell differentiation	8/184	165/18569	0.000243943	0.00284925	0.00221346	tfap2c/sema7a/sema3fb/sema3fa/nrp1a/cxcr4a/nrp1b/nrarpa	8
GO:0021510	GO:0021510	spinal cord development	6/184	89/18569	0.000256548	0.00296681	0.00230478	notch3/gli2a/dld/dll4/dlc/notch1b	6
GO:0006935	GO:0006935	chemotaxis	9/184	214/18569	0.000290823	0.00329787	0.00256197	vegfc/sema7a/sema3fb/efnb2a/cxcr4b/sema3fa/nrp1a/cxcr4a/rbpms2b	9
GO:0042330	GO:0042330	taxis	9/184	214/18569	0.000290823	0.00329787	0.00256197	vegfc/sema7a/sema3fb/efnb2a/cxcr4b/sema3fa/nrp1a/cxcr4a/rbpms2b	9
GO:0050770	GO:0050770	regulation of axonogenesis	6/184	92/18569	0.000307196	0.00345005	0.0026802	plxna3/sema7a/sema3fb/sema3fa/nrp1a/dpysl3	6
GO:0021594	GO:0021594	rhombomere formation	3/184	14/18569	0.00032149	0.00354245	0.00275198	notch3/efnb2a/notch1b	3
GO:0060837	GO:0060837	blood vessel endothelial cell differentiation	3/184	14/18569	0.00032149	0.00354245	0.00275198	notch3/hey2/dlc	3
GO:0050922	GO:0050922	negative regulation of chemotaxis	4/184	35/18569	0.000384258	0.00419452	0.00325854	sema7a/sema3fb/cxcr4b/sema3fa	4
GO:0030947	GO:0030947	regulation of vascular endothelial growth factor receptor signaling pathway	3/184	15/18569	0.000398939	0.00431445	0.00335171	dll4/nrp1a/nrp1b	3
GO:0045597	GO:0045597	positive regulation of cell differentiation	8/184	179/18569	0.000422016	0.00452215	0.00351306	plxna3/sema7a/tmem119b/metrnla/loxl2b/fgfr1b/ccn1l2/hapln3	8
GO:0001558	GO:0001558	regulation of cell growth	6/184	100/18569	0.000481134	0.00510877	0.00396878	plxna3/sema7a/sema3fb/cxcr4b/sema3fa/igfbp7	6
GO:0048859	GO:0048859	formation of anatomical boundary	3/184	16/18569	0.000487431	0.005129	0.0039845	notch3/efnb2a/notch1b	3
GO:0003158	GO:0003158	endothelium development	5/184	67/18569	0.00053151	0.00554289	0.00430603	notch3/hey2/meis1b/tnfrsf19/dlc	5
GO:0002042	GO:0002042	cell migration involved in sprouting angiogenesis	3/184	17/18569	0.000587578	0.0060201	0.00467675	efnb2a/cxcr4a/nrp1b	3
GO:0035476	GO:0035476	angioblast cell migration	3/184	17/18569	0.000587578	0.0060201	0.00467675	isl2a/efnb2a/meis1b	3
GO:0050673	GO:0050673	epithelial cell proliferation	5/184	70/18569	0.000650361	0.00660541	0.00513145	vegfc/loxl2b/dll4/cav1/nrarpa	5
GO:0071363	GO:0071363	cellular response to growth factor stimulus	10/184	292/18569	0.000685793	0.00690522	0.00536437	ntrk3b/sulf1/ndnf/gdf6a/scube2/vegfc/fgfr1b/dll4/nrp1a/nrp1b	10
GO:0060560	GO:0060560	developmental growth involved in morphogenesis	8/184	193/18569	0.000693815	0.00692629	0.00538073	plxna3/sema7a/sema3fb/isl2a/cxcr4b/sema3fa/nrp1a/tmem108	8
GO:0070848	GO:0070848	response to growth factor	10/184	293/18569	0.00070404	0.00696881	0.00541376	ntrk3b/sulf1/ndnf/gdf6a/scube2/vegfc/fgfr1b/dll4/nrp1a/nrp1b	10
GO:0030900	GO:0030900	forebrain development	7/184	150/18569	0.000748667	0.00734826	0.00570855	ndnf/gli2a/daam1a/tcf7l2/cxcr4b/nrp1a/dpysl3	7
GO:0021593	GO:0021593	rhombomere morphogenesis	3/184	19/18569	0.000825179	0.00803175	0.00623951	notch3/efnb2a/notch1b	3
GO:0001666	GO:0001666	response to hypoxia	5/184	76/18569	0.000946464	0.00913612	0.00709745	vegfc/loxl2b/nrp1a/nrp1b/cct4	5
GO:0001936	GO:0001936	regulation of endothelial cell proliferation	3/184	20/18569	0.000963753	0.00915173	0.00710958	vegfc/dll4/cav1	3
GO:0010594	GO:0010594	regulation of endothelial cell migration	3/184	20/18569	0.000963753	0.00915173	0.00710958	dll4/nrp1a/nrp1b	3
GO:0036293	GO:0036293	response to decreased oxygen levels	5/184	77/18569	0.00100417	0.0093843	0.00729025	vegfc/loxl2b/nrp1a/nrp1b/cct4	5
GO:0030336	GO:0030336	negative regulation of cell migration	4/184	45/18569	0.00101235	0.0093843	0.00729025	sulf1/cxcr4b/dll4/tnfrsf19	4
GO:0071526	GO:0071526	semaphorin-plexin signaling pathway	4/184	45/18569	0.00101235	0.0093843	0.00729025	plxna3/sema7a/sema3fb/sema3fa	4
GO:2000146	GO:2000146	negative regulation of cell motility	4/184	46/18569	0.00110026	0.010119	0.00786099	sulf1/cxcr4b/dll4/tnfrsf19	4
GO:0021546	GO:0021546	rhombomere development	3/184	21/18569	0.00111622	0.0101855	0.00791268	notch3/efnb2a/notch1b	3
GO:0061387	GO:0061387	regulation of extent of cell growth	5/184	79/18569	0.00112738	0.0102076	0.00792985	plxna3/sema7a/sema3fb/cxcr4b/sema3fa	5
GO:0070482	GO:0070482	response to oxygen levels	5/184	80/18569	0.00119302	0.0107	0.00831238	vegfc/loxl2b/nrp1a/nrp1b/cct4	5
GO:0001708	GO:0001708	cell fate specification	6/184	119/18569	0.00120009	0.0107	0.00831238	vox/scube2/tfap2c/gli2a/eve1/isl2a	6
GO:0031016	GO:0031016	pancreas development	7/184	166/18569	0.00135247	0.0119673	0.00929685	gli2a/isl2a/hoxc8a/dld/nr5a2/tcf7l2/ildr2	7
GO:0090287	GO:0090287	regulation of cellular response to growth factor stimulus	7/184	167/18569	0.00140005	0.0122952	0.00955162	sulf1/gdf6a/scube2/vegfc/dll4/nrp1a/nrp1b	7
GO:0048871	GO:0048871	multicellular organismal-level homeostasis	9/184	268/18569	0.00144834	0.012551	0.00975033	sulf1/gdf6a/notch3/sema3fb/metrnla/aqp1a.1/tcf7l2/sema3fa/meis1b	9
GO:0010632	GO:0010632	regulation of epithelial cell migration	3/184	23/18569	0.00146486	0.012551	0.00975033	dll4/nrp1a/nrp1b	3
GO:0019827	GO:0019827	stem cell population maintenance	3/184	23/18569	0.00146486	0.012551	0.00975033	notch3/loxl2b/notch1b	3
GO:0051130	GO:0051130	positive regulation of cellular component organization	8/184	217/18569	0.00147471	0.012551	0.00975033	ntrk3b/plxna3/ddr1/sema7a/evla/nrp1a/limch1b/nrp1b	8
GO:0048882	GO:0048882	lateral line development	6/184	124/18569	0.00148291	0.012551	0.00975033	sulf1/hoxb8a/cxcr4b/cav1/tnfrsf19/gpr156	6
GO:0031017	GO:0031017	exocrine pancreas development	4/184	50/18569	0.00150577	0.0125624	0.00975918	isl2a/hoxc8a/nr5a2/tcf7l2	4
GO:0035272	GO:0035272	exocrine system development	4/184	50/18569	0.00150577	0.0125624	0.00975918	isl2a/hoxc8a/nr5a2/tcf7l2	4
GO:0008045	GO:0008045	motor neuron axon guidance	4/184	53/18569	0.00187098	0.0153143	0.011897	plxna3/vegfc/gli2a/nrp1a	4
GO:0045746	GO:0045746	negative regulation of Notch signaling pathway	3/184	25/18569	0.00187496	0.0153143	0.011897	dld/dll4/dlc	3
GO:0098727	GO:0098727	maintenance of cell number	3/184	25/18569	0.00187496	0.0153143	0.011897	notch3/loxl2b/notch1b	3
GO:0048013	GO:0048013	ephrin receptor signaling pathway	3/184	26/18569	0.00210418	0.0170672	0.0132588	efnb2a/efna5a/efnb2b	3
GO:0050768	GO:0050768	negative regulation of neurogenesis	4/184	55/18569	0.00214595	0.017286	0.0134288	notch3/sema7a/sema3fb/sema3fa	4
GO:0032102	GO:0032102	negative regulation of response to external stimulus	5/184	92/18569	0.00221882	0.0177505	0.0137896	sema7a/sema3fb/metrnla/cxcr4b/sema3fa	5
GO:0040008	GO:0040008	regulation of growth	6/184	138/18569	0.00254728	0.0202396	0.0157233	plxna3/sema7a/sema3fb/cxcr4b/sema3fa/igfbp7	6
GO:0051961	GO:0051961	negative regulation of nervous system development	4/184	58/18569	0.00260886	0.0205888	0.0159946	notch3/sema7a/sema3fb/sema3fa	4
GO:0048925	GO:0048925	lateral line system development	6/184	140/18569	0.00273675	0.0214532	0.0166661	sulf1/hoxb8a/cxcr4b/cav1/tnfrsf19/gpr156	6
GO:1901342	GO:1901342	regulation of vasculature development	5/184	98/18569	0.00292188	0.0227517	0.0176748	vegfc/tspan18a/lrp1aa/dll4/meis1b	5
GO:0008593	GO:0008593	regulation of Notch signaling pathway	4/184	61/18569	0.00313602	0.0241835	0.0187871	dld/dll4/dlc/bmp2k	4
GO:0042246	GO:0042246	tissue regeneration	6/184	144/18569	0.00314717	0.0241835	0.0187871	hoxc13b/hoxc13a/vegfc/cxcr4b/cav1/notch1b	6
GO:0048843	GO:0048843	negative regulation of axon extension involved in axon guidance	3/184	30/18569	0.00319176	0.0243659	0.0189288	sema7a/sema3fb/sema3fa	3
GO:0008361	GO:0008361	regulation of cell size	5/184	102/18569	0.00347203	0.0261634	0.0203252	plxna3/sema7a/sema3fb/cxcr4b/sema3fa	5
GO:0042060	GO:0042060	wound healing	5/184	102/18569	0.00347203	0.0261634	0.0203252	vim/nrp1a/f13a1b/sdc4/rhocb	5
GO:0007422	GO:0007422	peripheral nervous system development	4/184	65/18569	0.00394598	0.029356	0.0228054	her4.4/notch3/dpysl3/notch1b	4
GO:0030516	GO:0030516	regulation of axon extension	4/184	65/18569	0.00394598	0.029356	0.0228054	sema7a/sema3fb/cxcr4b/sema3fa	4
GO:1902667	GO:1902667	regulation of axon guidance	2/184	10/18569	0.00417072	0.0308317	0.0239518	nrp1a/rbpms2b	2
GO:0055123	GO:0055123	digestive system development	6/184	153/18569	0.0042369	0.0311239	0.0241788	gli2a/isl2a/hoxc8a/dld/nr5a2/tcf7l2	6
GO:0051241	GO:0051241	negative regulation of multicellular organismal process	7/184	204/18569	0.00429181	0.0313302	0.0243391	apoc1/notch3/sema7a/sema3fb/loxl2b/sema3fa/dll4	7
GO:0061448	GO:0061448	connective tissue development	7/184	205/18569	0.00440727	0.0319505	0.024821	thbs4b/fgfrl1b/ostn/nr5a2/loxl2b/fgfr1b/nrp1a	7
GO:0048638	GO:0048638	regulation of developmental growth	5/184	108/18569	0.00443149	0.0319505	0.024821	plxna3/sema7a/sema3fb/cxcr4b/sema3fa	5
GO:0050678	GO:0050678	regulation of epithelial cell proliferation	3/184	35/18569	0.0049624	0.0355588	0.0276241	vegfc/dll4/cav1	3
GO:0019755	GO:0019755	one-carbon compound transport	2/184	11/18569	0.00506445	0.0355936	0.0276511	aqp8a.1/aqp1a.1	2
GO:0042693	GO:0042693	muscle cell fate commitment	2/184	11/18569	0.00506445	0.0355936	0.0276511	scube2/gli2a	2
GO:0048070	GO:0048070	regulation of developmental pigmentation	2/184	11/18569	0.00506445	0.0355936	0.0276511	sulf1/gdf6a	2
GO:0090066	GO:0090066	regulation of anatomical structure size	8/184	266/18569	0.00512718	0.0355936	0.0276511	adrb3a/plxna3/notch3/sema7a/sema3fb/evla/cxcr4b/sema3fa	8
GO:0006909	GO:0006909	phagocytosis	4/184	70/18569	0.00514366	0.0355936	0.0276511	sema3fb/colec12/lrp1aa/sema3fa	4
GO:0031099	GO:0031099	regeneration	7/184	211/18569	0.0051501	0.0355936	0.0276511	hoxc13b/hoxc13a/vegfc/cxcr4b/mcamb/cav1/notch1b	7
GO:0048916	GO:0048916	posterior lateral line development	4/184	71/18569	0.00540931	0.0371651	0.028872	hoxb8a/cxcr4b/tnfrsf19/gpr156	4
GO:0010721	GO:0010721	negative regulation of cell development	4/184	72/18569	0.00568397	0.0388239	0.0301606	notch3/sema7a/sema3fb/sema3fa	4
GO:0001889	GO:0001889	liver development	6/184	163/18569	0.00575012	0.0390474	0.0303342	dnah7/notch3/dld/nr5a2/cebpa/xbp1	6
GO:0030517	GO:0030517	negative regulation of axon extension	3/184	37/18569	0.00580664	0.0392032	0.0304553	sema7a/sema3fb/sema3fa	3
GO:0007501	GO:0007501	mesodermal cell fate specification	2/184	12/18569	0.00603791	0.0400697	0.0311284	vox/eve1	2
GO:0010595	GO:0010595	positive regulation of endothelial cell migration	2/184	12/18569	0.00603791	0.0400697	0.0311284	nrp1a/nrp1b	2
GO:0120305	GO:0120305	regulation of pigmentation	2/184	12/18569	0.00603791	0.0400697	0.0311284	sulf1/gdf6a	2
GO:0042327	GO:0042327	positive regulation of phosphorylation	6/184	165/18569	0.00609472	0.0402183	0.0312438	ntrk3b/ddr1/vegfc/fgfr1b/ghrb/flt1	6
GO:0033333	GO:0033333	fin development	5/184	117/18569	0.0062046	0.0407133	0.0316284	hoxa13a/fbln1/hoxc8a/fgfr1b/dll4	5
GO:0050919	GO:0050919	negative chemotaxis	3/184	38/18569	0.00625899	0.0408408	0.0317274	sema7a/sema3fb/sema3fa	3
GO:0030855	GO:0030855	epithelial cell differentiation	8/184	276/18569	0.0063655	0.041305	0.0320881	notch3/hey2/nr5a2/cxcr4a/meis1b/tnfrsf19/dlc/gpr156	8
GO:0030155	GO:0030155	regulation of cell adhesion	6/184	167/18569	0.00645414	0.04142	0.0321774	plxna3/lmo7a/efna5a/ccdc80/limch1b/nrarpa	6
GO:0061008	GO:0061008	hepaticobiliary system development	6/184	167/18569	0.00645414	0.04142	0.0321774	dnah7/notch3/dld/nr5a2/cebpa/xbp1	6
GO:0048841	GO:0048841	regulation of axon extension involved in axon guidance	3/184	39/18569	0.00673179	0.0427323	0.0331968	sema7a/sema3fb/sema3fa	3
GO:0050771	GO:0050771	negative regulation of axonogenesis	3/184	39/18569	0.00673179	0.0427323	0.0331968	sema7a/sema3fb/sema3fa	3
GO:0097006	GO:0097006	regulation of plasma lipoprotein particle levels	2/184	13/18569	0.00708944	0.0447593	0.0347715	apoc1/apoeb	2
GO:0048736	GO:0048736	appendage development	5/184	124/18569	0.00789066	0.0495499	0.0384932	hoxa13a/fbln1/hoxc8a/fgfr1b/dll4	5
GO:0001710	GO:0001710	mesodermal cell fate commitment	2/184	14/18569	0.00821744	0.051053	0.0396609	vox/eve1	2
GO:0001776	GO:0001776	leukocyte homeostasis	2/184	14/18569	0.00821744	0.051053	0.0396609	sema3fb/sema3fa	2
GO:0010562	GO:0010562	positive regulation of phosphorus metabolic process	6/184	178/18569	0.00871168	0.0534494	0.0415225	ntrk3b/ddr1/vegfc/fgfr1b/ghrb/flt1	6
GO:0045937	GO:0045937	positive regulation of phosphate metabolic process	6/184	178/18569	0.00871168	0.0534494	0.0415225	ntrk3b/ddr1/vegfc/fgfr1b/ghrb/flt1	6
GO:0051240	GO:0051240	positive regulation of multicellular organismal process	8/184	292/18569	0.00880325	0.0534494	0.0415225	sulf1/plxna3/vegfc/sema7a/tmem119b/loxl2b/meis1b/hapln3	8
GO:0030301	GO:0030301	cholesterol transport	3/184	43/18569	0.00883196	0.0534494	0.0415225	apoc1/apoeb/cav1	3
GO:0048640	GO:0048640	negative regulation of developmental growth	3/184	43/18569	0.00883196	0.0534494	0.0415225	sema7a/sema3fb/sema3fa	3
GO:0010634	GO:0010634	positive regulation of epithelial cell migration	2/184	15/18569	0.00942028	0.0564251	0.0438342	nrp1a/nrp1b	2
GO:0043535	GO:0043535	regulation of blood vessel endothelial cell migration	2/184	15/18569	0.00942028	0.0564251	0.0438342	dll4/nrp1b	2
GO:0048915	GO:0048915	posterior lateral line system development	4/184	84/18569	0.00972969	0.057981	0.0450429	hoxb8a/cxcr4b/tnfrsf19/gpr156	4
GO:0048884	GO:0048884	neuromast development	4/184	86/18569	0.0105468	0.062467	0.0485279	sulf1/cav1/tnfrsf19/gpr156	4
GO:0010669	GO:0010669	epithelial structure maintenance	2/184	16/18569	0.0106964	0.062467	0.0485279	sulf1/tcf7l2	2
GO:0048885	GO:0048885	neuromast deposition	2/184	16/18569	0.0106964	0.062467	0.0485279	sulf1/tnfrsf19	2
GO:0051489	GO:0051489	regulation of filopodium assembly	2/184	16/18569	0.0106964	0.062467	0.0485279	nrp1a/nrp1b	2
GO:0048881	GO:0048881	mechanosensory lateral line system development	4/184	87/18569	0.0109715	0.063365	0.0492255	hoxb8a/cxcr4b/tnfrsf19/gpr156	4
GO:0060218	GO:0060218	hematopoietic stem cell differentiation	4/184	87/18569	0.0109715	0.063365	0.0492255	gata2b/dld/dlc/notch1b	4
GO:0050790	GO:0050790	regulation of catalytic activity	11/184	498/18569	0.0110129	0.063365	0.0492255	ntrk3b/apoc1/plxna3/ddr1/arhgap45b/fgfr1b/cav1/arhgap29b/flt1/casp22/cap1	11
GO:0015918	GO:0015918	sterol transport	3/184	47/18569	0.0112752	0.0639291	0.0496637	apoc1/apoeb/cav1	3
GO:0048846	GO:0048846	axon extension involved in axon guidance	3/184	47/18569	0.0112752	0.0639291	0.0496637	sema7a/sema3fb/sema3fa	3
GO:1902284	GO:1902284	neuron projection extension involved in neuron projection guidance	3/184	47/18569	0.0112752	0.0639291	0.0496637	sema7a/sema3fb/sema3fa	3
GO:0021536	GO:0021536	diencephalon development	4/184	88/18569	0.0114071	0.0643433	0.0499855	ndnf/gli2a/daam1a/tcf7l2	4
GO:0043085	GO:0043085	positive regulation of catalytic activity	8/184	306/18569	0.0114584	0.0643433	0.0499855	ntrk3b/ddr1/arhgap45b/fgfr1b/arhgap29b/flt1/casp22/cap1	8
GO:0030308	GO:0030308	negative regulation of cell growth	3/184	48/18569	0.0119407	0.0667309	0.0518403	sema7a/sema3fb/sema3fa	3
GO:0006833	GO:0006833	water transport	2/184	17/18569	0.0120442	0.0669889	0.0520408	aqp8a.1/aqp1a.1	2
GO:0002244	GO:0002244	hematopoietic progenitor cell differentiation	5/184	138/18569	0.0121704	0.0673698	0.0523366	gata2b/notch3/dld/dlc/notch1b	5
GO:0045765	GO:0045765	regulation of angiogenesis	4/184	90/18569	0.0123113	0.0676694	0.0525694	vegfc/tspan18a/dll4/meis1b	4
GO:0051216	GO:0051216	cartilage development	6/184	192/18569	0.0123404	0.0676694	0.0525694	fgfrl1b/ostn/nr5a2/loxl2b/fgfr1b/nrp1a	6
GO:0001894	GO:0001894	tissue homeostasis	4/184	91/18569	0.0127801	0.0697528	0.0541879	sulf1/gdf6a/notch3/tcf7l2	4
GO:0009968	GO:0009968	negative regulation of signal transduction	10/184	443/18569	0.0131007	0.0711702	0.0552891	sulf1/gdf6a/scube2/dld/socs3b/btk/dll4/nxn/dlc/tnfaip8l1	10
GO:0033674	GO:0033674	positive regulation of kinase activity	4/184	92/18569	0.0132601	0.0717028	0.0557028	ntrk3b/ddr1/fgfr1b/flt1	4
GO:0010977	GO:0010977	negative regulation of neuron projection development	3/184	50/18569	0.0133384	0.0717936	0.0557733	sema7a/sema3fb/sema3fa	3
GO:0050918	GO:0050918	positive chemotaxis	2/184	18/18569	0.0134623	0.0717988	0.0557774	vegfc/cxcr4b	2
GO:0061026	GO:0061026	cardiac muscle tissue regeneration	2/184	18/18569	0.0134623	0.0717988	0.0557774	vegfc/cav1	2
GO:0060249	GO:0060249	anatomical structure homeostasis	4/184	94/18569	0.0142544	0.0756777	0.0587907	sulf1/gdf6a/notch3/tcf7l2	4
GO:0021986	GO:0021986	habenula development	2/184	19/18569	0.014949	0.0776019	0.0602855	daam1a/tcf7l2	2
GO:0042044	GO:0042044	fluid transport	2/184	19/18569	0.014949	0.0776019	0.0602855	aqp8a.1/aqp1a.1	2
GO:0050921	GO:0050921	positive regulation of chemotaxis	2/184	19/18569	0.014949	0.0776019	0.0602855	vegfc/cxcr4b	2
GO:0060038	GO:0060038	cardiac muscle cell proliferation	2/184	19/18569	0.014949	0.0776019	0.0602855	hey2/cav1	2
GO:1903670	GO:1903670	regulation of sprouting angiogenesis	2/184	19/18569	0.014949	0.0776019	0.0602855	tspan18a/dll4	2
GO:0051347	GO:0051347	positive regulation of transferase activity	4/184	96/18569	0.0152947	0.0790449	0.0614066	ntrk3b/ddr1/fgfr1b/flt1	4
GO:0031345	GO:0031345	negative regulation of cell projection organization	3/184	53/18569	0.0156027	0.0799186	0.0620853	sema7a/sema3fb/sema3fa	3
GO:0045926	GO:0045926	negative regulation of growth	3/184	53/18569	0.0156027	0.0799186	0.0620853	sema7a/sema3fb/sema3fa	3
GO:0010648	GO:0010648	negative regulation of cell communication	10/184	456/18569	0.0157374	0.0799186	0.0620853	sulf1/gdf6a/scube2/dld/socs3b/btk/dll4/nxn/dlc/tnfaip8l1	10
GO:0023057	GO:0023057	negative regulation of signaling	10/184	456/18569	0.0157374	0.0799186	0.0620853	sulf1/gdf6a/scube2/dld/socs3b/btk/dll4/nxn/dlc/tnfaip8l1	10
GO:0002685	GO:0002685	regulation of leukocyte migration	3/184	54/18569	0.0164025	0.0823735	0.0639924	vegfc/cxcr4b/cd99	3
GO:0030038	GO:0030038	contractile actin filament bundle assembly	2/184	20/18569	0.0165029	0.0823735	0.0639924	limch1b/sdc4	2
GO:0043149	GO:0043149	stress fiber assembly	2/184	20/18569	0.0165029	0.0823735	0.0639924	limch1b/sdc4	2
GO:0048844	GO:0048844	artery morphogenesis	2/184	20/18569	0.0165029	0.0823735	0.0639924	hey2/meis1b	2
GO:0007015	GO:0007015	actin filament organization	8/184	330/18569	0.0173224	0.0858858	0.066721	evla/cnn3b/dpysl3/tagln2/limch1b/sdc4/cap1/rhocb	8
GO:0008284	GO:0008284	positive regulation of cell population proliferation	5/184	151/18569	0.0173536	0.0858858	0.066721	vegfc/tmem119b/fgfr1b/meis1b/hapln3	5
GO:0042325	GO:0042325	regulation of phosphorylation	7/184	268/18569	0.0176322	0.0868961	0.0675058	ntrk3b/ddr1/vegfc/fgfr1b/ghrb/cav1/flt1	7
GO:0032535	GO:0032535	regulation of cellular component size	6/184	209/18569	0.0180367	0.0881965	0.068516	plxna3/sema7a/sema3fb/evla/cxcr4b/sema3fa	6
GO:0048259	GO:0048259	regulation of receptor-mediated endocytosis	2/184	21/18569	0.0181226	0.0881965	0.068516	notch3/bmp2k	2
GO:0055017	GO:0055017	cardiac muscle tissue growth	2/184	21/18569	0.0181226	0.0881965	0.068516	hey2/cav1	2
GO:0009953	GO:0009953	dorsal/ventral pattern formation	5/184	154/18569	0.0187288	0.0902425	0.0701055	vox/gdf6a/gli2a/eve1/cav1	5
GO:0009799	GO:0009799	specification of symmetry	8/184	335/18569	0.0187748	0.0902425	0.0701055	dnah7/gdf6a/dld/tcf7l2/cxcr4b/mcamb/meis1b/flt1	8
GO:0009855	GO:0009855	determination of bilateral symmetry	8/184	335/18569	0.0187748	0.0902425	0.0701055	dnah7/gdf6a/dld/tcf7l2/cxcr4b/mcamb/meis1b/flt1	8
GO:0031076	GO:0031076	embryonic camera-type eye development	3/184	57/18569	0.0189382	0.0902847	0.0701383	gdf6a/efnb2a/znf503	3
GO:0050727	GO:0050727	regulation of inflammatory response	3/184	57/18569	0.0189382	0.0902847	0.0701383	sema7a/metrnla/cxcr4b	3
GO:0002688	GO:0002688	regulation of leukocyte chemotaxis	2/184	22/18569	0.0198065	0.0932823	0.072467	vegfc/cxcr4b	2
GO:0021538	GO:0021538	epithalamus development	2/184	22/18569	0.0198065	0.0932823	0.072467	daam1a/tcf7l2	2
GO:0036342	GO:0036342	post-anal tail morphogenesis	2/184	22/18569	0.0198065	0.0932823	0.072467	eve1/fgfr1b	2
GO:0044089	GO:0044089	positive regulation of cellular component biogenesis	4/184	105/18569	0.0205623	0.0964528	0.07493	evla/nrp1a/limch1b/nrp1b	4
GO:0014855	GO:0014855	striated muscle cell proliferation	2/184	23/18569	0.0215533	0.0991114	0.0769953	hey2/cav1	2
GO:0030500	GO:0030500	regulation of bone mineralization	2/184	23/18569	0.0215533	0.0991114	0.0769953	tmem119b/bmp2k	2
GO:0070167	GO:0070167	regulation of biomineral tissue development	2/184	23/18569	0.0215533	0.0991114	0.0769953	tmem119b/bmp2k	2
GO:0071910	GO:0071910	determination of liver left/right asymmetry	2/184	23/18569	0.0215533	0.0991114	0.0769953	dnah7/dld	2
GO:1902622	GO:1902622	regulation of neutrophil migration	2/184	23/18569	0.0215533	0.0991114	0.0769953	cxcr4b/cd99	2
GO:0090288	GO:0090288	negative regulation of cellular response to growth factor stimulus	3/184	60/18569	0.0216786	0.0992965	0.0771391	sulf1/gdf6a/scube2	3
GO:0060216	GO:0060216	definitive hemopoiesis	3/184	62/18569	0.0236196	0.107764	0.0837176	gata2b/meis1b/cebpa	3
GO:0001885	GO:0001885	endothelial cell development	2/184	25/18569	0.02523	0.113341	0.0880498	meis1b/tnfrsf19	2
GO:0042659	GO:0042659	regulation of cell fate specification	2/184	25/18569	0.02523	0.113341	0.0880498	vox/eve1	2
GO:0060419	GO:0060419	heart growth	2/184	25/18569	0.02523	0.113341	0.0880498	hey2/cav1	2
GO:2000027	GO:2000027	regulation of animal organ morphogenesis	2/184	25/18569	0.02523	0.113341	0.0880498	vox/eve1	2
GO:0007498	GO:0007498	mesoderm development	4/184	112/18569	0.025344	0.113417	0.0881085	vox/eve1/dld/fgfr1b	4
GO:0044093	GO:0044093	positive regulation of molecular function	8/184	357/18569	0.026211	0.116849	0.0907749	ntrk3b/ddr1/arhgap45b/fgfr1b/arhgap29b/flt1/casp22/cap1	8
GO:0043549	GO:0043549	regulation of kinase activity	5/184	170/18569	0.0272736	0.121124	0.0940959	ntrk3b/ddr1/fgfr1b/cav1/flt1	5
GO:0008037	GO:0008037	cell recognition	3/184	67/18569	0.0288709	0.127482	0.0990349	colec12/efnb2a/nrp1a	3
GO:0010810	GO:0010810	regulation of cell-substrate adhesion	2/184	27/18569	0.0291418	0.127482	0.0990349	ccdc80/limch1b	2
GO:0022600	GO:0022600	digestive system process	2/184	27/18569	0.0291418	0.127482	0.0990349	tcf7l2/cav1	2
GO:0048333	GO:0048333	mesodermal cell differentiation	2/184	27/18569	0.0291418	0.127482	0.0990349	vox/eve1	2
GO:0010976	GO:0010976	positive regulation of neuron projection development	2/184	28/18569	0.0311824	0.134893	0.104792	ntrk3b/ddr1	2
GO:0030278	GO:0030278	regulation of ossification	2/184	28/18569	0.0311824	0.134893	0.104792	tmem119b/bmp2k	2
GO:0048920	GO:0048920	posterior lateral line neuromast primordium migration	2/184	28/18569	0.0311824	0.134893	0.104792	hoxb8a/cxcr4b	2
GO:0019220	GO:0019220	regulation of phosphate metabolic process	7/184	304/18569	0.0321398	0.138012	0.107216	ntrk3b/ddr1/vegfc/fgfr1b/ghrb/cav1/flt1	7
GO:0051174	GO:0051174	regulation of phosphorus metabolic process	7/184	304/18569	0.0321398	0.138012	0.107216	ntrk3b/ddr1/vegfc/fgfr1b/ghrb/cav1/flt1	7
GO:0051338	GO:0051338	regulation of transferase activity	5/184	179/18569	0.0330169	0.139659	0.108495	ntrk3b/ddr1/fgfr1b/cav1/flt1	5
GO:0010453	GO:0010453	regulation of cell fate commitment	2/184	29/18569	0.0332779	0.139659	0.108495	vox/eve1	2
GO:0046847	GO:0046847	filopodium assembly	2/184	29/18569	0.0332779	0.139659	0.108495	nrp1a/nrp1b	2
GO:0048883	GO:0048883	neuromast primordium migration	2/184	29/18569	0.0332779	0.139659	0.108495	hoxb8a/cxcr4b	2
GO:0060059	GO:0060059	embryonic retina morphogenesis in camera-type eye	2/184	29/18569	0.0332779	0.139659	0.108495	gdf6a/meis1b	2
GO:0120034	GO:0120034	positive regulation of plasma membrane bounded cell projection assembly	2/184	29/18569	0.0332779	0.139659	0.108495	nrp1a/nrp1b	2
GO:0007492	GO:0007492	endoderm development	3/184	71/18569	0.03348	0.139659	0.108495	vox/vegfc/ildr2	3
GO:0050769	GO:0050769	positive regulation of neurogenesis	3/184	71/18569	0.03348	0.139659	0.108495	plxna3/sema7a/hapln3	3
GO:0007368	GO:0007368	determination of left/right symmetry	7/184	307/18569	0.0336268	0.139773	0.108583	dnah7/dld/tcf7l2/cxcr4b/mcamb/meis1b/flt1	7
GO:0007224	GO:0007224	smoothened signaling pathway	3/184	72/18569	0.0346885	0.142663	0.110828	sulf1/scube2/gli2a	3
GO:0044344	GO:0044344	cellular response to fibroblast growth factor stimulus	3/184	72/18569	0.0346885	0.142663	0.110828	sulf1/ndnf/fgfr1b	3
GO:0071774	GO:0071774	response to fibroblast growth factor	3/184	72/18569	0.0346885	0.142663	0.110828	sulf1/ndnf/fgfr1b	3
GO:0060047	GO:0060047	heart contraction	5/184	182/18569	0.0350865	0.142685	0.110846	tnni4b.2/gja5a/flt1/junba/crip2	5
GO:0002687	GO:0002687	positive regulation of leukocyte migration	2/184	30/18569	0.0354269	0.142685	0.110846	vegfc/cd99	2
GO:0003073	GO:0003073	regulation of systemic arterial blood pressure	2/184	30/18569	0.0354269	0.142685	0.110846	adrb3a/ccdc80	2
GO:0030223	GO:0030223	neutrophil differentiation	2/184	30/18569	0.0354269	0.142685	0.110846	meis1b/cebpa	2
GO:0033002	GO:0033002	muscle cell proliferation	2/184	30/18569	0.0354269	0.142685	0.110846	hey2/cav1	2
GO:0043277	GO:0043277	apoptotic cell clearance	2/184	30/18569	0.0354269	0.142685	0.110846	sema3fb/sema3fa	2
GO:0060795	GO:0060795	cell fate commitment involved in formation of primary germ layer	2/184	31/18569	0.0376282	0.15103	0.117329	vox/eve1	2
GO:0060972	GO:0060972	left/right pattern formation	7/184	315/18569	0.0378148	0.151259	0.117507	dnah7/dld/tcf7l2/cxcr4b/mcamb/meis1b/flt1	7
GO:0003015	GO:0003015	heart process	5/184	186/18569	0.0379685	0.151356	0.117582	tnni4b.2/gja5a/flt1/junba/crip2	5
GO:0007586	GO:0007586	digestion	2/184	32/18569	0.0398806	0.157367	0.122251	tcf7l2/cav1	2
GO:0008038	GO:0008038	neuron recognition	2/184	32/18569	0.0398806	0.157367	0.122251	efnb2a/nrp1a	2
GO:0045766	GO:0045766	positive regulation of angiogenesis	2/184	32/18569	0.0398806	0.157367	0.122251	vegfc/meis1b	2
GO:0006897	GO:0006897	endocytosis	7/184	320/18569	0.0405995	0.159664	0.124036	notch3/sema3fb/ehd2b/colec12/lrp1aa/sema3fa/bmp2k	7
GO:0035113	GO:0035113	embryonic appendage morphogenesis	2/184	33/18569	0.0421827	0.164781	0.128011	fbln1/hoxc8a	2
GO:1904018	GO:1904018	positive regulation of vasculature development	2/184	33/18569	0.0421827	0.164781	0.128011	vegfc/meis1b	2
GO:0050772	GO:0050772	positive regulation of axonogenesis	2/184	34/18569	0.0445335	0.173384	0.134694	plxna3/sema7a	2
GO:0070121	GO:0070121	Kupffer's vesicle development	3/184	80/18569	0.0451547	0.175218	0.136119	cxcr4b/efnb2b/cxcr4a	3
GO:0021522	GO:0021522	spinal cord motor neuron differentiation	2/184	35/18569	0.0469318	0.181511	0.141008	gli2a/dld	2
GO:0045944	GO:0045944	positive regulation of transcription by RNA polymerase II	7/184	332/18569	0.0478195	0.184334	0.143201	gata2b/si:dkey-68o6.6/si:dkey-68o6.5/isl2a/meis1b/hoxa4a/hoxb4a	7
GO:0060173	GO:0060173	limb development	3/184	82/18569	0.0479894	0.18438	0.143237	hoxc8a/fgfr1b/dll4	3
GO:0030902	GO:0030902	hindbrain development	4/184	138/18569	0.0485802	0.186038	0.144525	notch3/efnb2a/znf503/notch1b	4
GO:0050730	GO:0050730	regulation of peptidyl-tyrosine phosphorylation	2/184	36/18569	0.0493763	0.188469	0.146413	ghrb/cav1	2
GO:0060562	GO:0060562	epithelial tube morphogenesis	6/184	268/18569	0.0510209	0.194112	0.150797	vegfc/tfap2c/dll4/meis1b/igfbp7/nrarpa	6
GO:0048919	GO:0048919	posterior lateral line neuromast development	2/184	37/18569	0.051866	0.196687	0.152797	tnfrsf19/gpr156	2
GO:0051962	GO:0051962	positive regulation of nervous system development	3/184	85/18569	0.0524014	0.198074	0.153875	plxna3/sema7a/hapln3	3
GO:0001819	GO:0001819	positive regulation of cytokine production	2/184	38/18569	0.0543997	0.203386	0.158002	sulf1/sema7a	2
GO:0048546	GO:0048546	digestive tract morphogenesis	2/184	38/18569	0.0543997	0.203386	0.158002	gli2a/dld	2
GO:0045893	GO:0045893	positive regulation of DNA-templated transcription	9/184	488/18569	0.0545034	0.203386	0.158002	gata2b/si:dkey-68o6.6/si:dkey-68o6.5/isl2a/mafk/rps6ka1/meis1b/hoxa4a/hoxb4a	9
GO:1902680	GO:1902680	positive regulation of RNA biosynthetic process	9/184	488/18569	0.0545034	0.203386	0.158002	gata2b/si:dkey-68o6.6/si:dkey-68o6.5/isl2a/mafk/rps6ka1/meis1b/hoxa4a/hoxb4a	9
GO:2000736	GO:2000736	regulation of stem cell differentiation	2/184	39/18569	0.0569764	0.210027	0.163161	dld/fosl2	2
GO:0008285	GO:0008285	negative regulation of cell population proliferation	3/184	88/18569	0.0570023	0.210027	0.163161	dll4/cav1/btg2	3
GO:0031101	GO:0031101	fin regeneration	3/184	88/18569	0.0570023	0.210027	0.163161	hoxc13b/hoxc13a/notch1b	3
GO:0048066	GO:0048066	developmental pigmentation	3/184	88/18569	0.0570023	0.210027	0.163161	sulf1/gdf6a/nrarpa	3
GO:0061061	GO:0061061	muscle structure development	8/184	422/18569	0.0595576	0.218752	0.169939	gdf6a/scube2/gli2a/postnb/cxcr4a/fosl2/tgfbi/rbpms2b	8
GO:0000082	GO:0000082	G1/S transition of mitotic cell cycle	2/184	41/18569	0.0622541	0.22794	0.177076	cxcr4a/meis1b	2
GO:0001837	GO:0001837	epithelial to mesenchymal transition	2/184	42/18569	0.064953	0.23634	0.183602	tfap2c/loxl2b	2
GO:0030851	GO:0030851	granulocyte differentiation	2/184	42/18569	0.064953	0.23634	0.183602	meis1b/cebpa	2
GO:0010720	GO:0010720	positive regulation of cell development	3/184	94/18569	0.0667553	0.242144	0.188111	plxna3/sema7a/hapln3	3
GO:0044843	GO:0044843	cell cycle G1/S phase transition	2/184	43/18569	0.0676907	0.244776	0.190156	cxcr4a/meis1b	2
GO:0006898	GO:0006898	receptor-mediated endocytosis	3/184	95/18569	0.0684505	0.246105	0.191188	notch3/lrp1aa/bmp2k	3
GO:0031347	GO:0031347	regulation of defense response	4/184	155/18569	0.0684796	0.246105	0.191188	sema7a/metrnla/cxcr4b/cav1	4
GO:0070098	GO:0070098	chemokine-mediated signaling pathway	2/184	44/18569	0.0704659	0.252467	0.196131	cxcr4b/cxcr4a	2

## Sheet: tab.go_DEG_Multi48_cluster0
48 hpf cl 0	ID	Description	GeneRatio	BgRatio	pvalue	p.adjust	qvalue	geneID	Count
GO:0034660	GO:0034660	ncRNA metabolic process	232/3491	401/18569	4.21297e-69	1.28706e-65	1.07453e-65	mrm1/tdrd6/zgc:103759/ddx11/trmt61a/thg1l/zcchc7/tut1/naf1/rpp25l/lrrc47/mrm3a/exosc6/trub1/znhit6/rrp36/thada/prkra/zcchc4/pus1/bop1/tsr2/trmt13/rpp14/nsun5/mocs3/dimt1l/pus3/tfb2m/imp4/gnl3l/nifk/rsl1d1/mrto4/iars1/bxdc2/tsen2/exosc5/pwp1/pus10/nol6/tp53rk/zc3h7a/snu13b/dus2/utp6/fbl/polr1d/trnt1/dkc1/wdr4/polr3d/bysl/dcaf13/mettl1/yars1/pus7/eif6/rars1/gnl3/wdr12/dis3/wars1/rrp7a/ssb/tdrkh/rio…	232
GO:0022613	GO:0022613	ribonucleoprotein complex biogenesis	201/3491	328/18569	7.96845e-66	1.21718e-62	1.01619e-62	mrm1/shq1/coil/srpk1b/mterf3/naf1/mrm3a/exosc6/znhit6/rrp36/zcchc4/npm1a/bop1/tsr2/nsun5/c1qbp/dimt1l/polr1c/tfb2m/imp4/gnl3l/nifk/rsl1d1/mrto4/nop58/bxdc2/pwp1/eif3hb/nol6/trnau1apa/npm1b/snu13b/sdad1/utp6/fbl/polr1d/dkc1/bysl/nom1/dcaf13/noc2l/urb2/eif6/gnl3/wdr12/sbds/rrp7a/riok2/exosc2/gar1/utp15/ncl/rpusd2/wdr36/imp3/snu13a/eri1/mphosph10/ddx18/nop10/pdcd11/tma16/bud23/rpl7l1/exosc7/nop16/rc…	201
GO:0034470	GO:0034470	ncRNA processing	189/3491	314/18569	3.91781e-60	3.98964e-57	3.33083e-57	mrm1/tdrd6/trmt61a/thg1l/tut1/naf1/rpp25l/mrm3a/exosc6/trub1/znhit6/rrp36/thada/prkra/zcchc4/pus1/bop1/tsr2/trmt13/rpp14/nsun5/mocs3/dimt1l/pus3/tfb2m/imp4/gnl3l/nifk/rsl1d1/mrto4/bxdc2/tsen2/exosc5/pwp1/pus10/nol6/tp53rk/zc3h7a/snu13b/dus2/utp6/fbl/trnt1/dkc1/wdr4/bysl/dcaf13/mettl1/pus7/eif6/gnl3/wdr12/rrp7a/ssb/tdrkh/riok2/exosc2/si:ch211-225b11.4/gar1/alkbh8/utp15/rpp30/ncl/rpusd2/wdr36/imp3/…	189
GO:0042254	GO:0042254	ribosome biogenesis	147/3491	232/18569	5.98745e-51	4.57291e-48	3.81779e-48	mrm1/mterf3/naf1/mrm3a/exosc6/znhit6/rrp36/zcchc4/npm1a/bop1/tsr2/nsun5/c1qbp/dimt1l/polr1c/tfb2m/imp4/gnl3l/nifk/rsl1d1/mrto4/nop58/bxdc2/pwp1/nol6/npm1b/snu13b/sdad1/utp6/fbl/polr1d/dkc1/bysl/nom1/dcaf13/noc2l/urb2/eif6/gnl3/wdr12/sbds/rrp7a/riok2/exosc2/gar1/utp15/ncl/rpusd2/wdr36/imp3/snu13a/eri1/mphosph10/ddx18/nop10/pdcd11/tma16/bud23/rpl7l1/exosc7/nop16/rcl1/nop14/heatr3/noc4l/rrp15/exosc8…	147
GO:0016072	GO:0016072	rRNA metabolic process	122/3491	180/18569	3.87973e-47	2.37052e-44	1.97907e-44	mrm1/ddx11/zcchc7/naf1/mrm3a/exosc6/znhit6/rrp36/zcchc4/bop1/tsr2/nsun5/dimt1l/tfb2m/imp4/gnl3l/nifk/rsl1d1/mrto4/bxdc2/exosc5/pwp1/nol6/snu13b/utp6/fbl/polr1d/dkc1/bysl/dcaf13/eif6/gnl3/wdr12/dis3/rrp7a/riok2/exosc2/gar1/utp15/polr1e/ncl/rpusd2/wdr36/imp3/snu13a/eri1/mphosph10/ddx18/nop10/pdcd11/bud23/rpl7l1/exosc7/rcl1/rrp15/exosc8/pes/ddx49/rrs1/ppan/utp25/taf1b/nop2/rpf2/abt1/rexo4/wdr75/utp3…	122
GO:0006364	GO:0006364	rRNA processing	112/3491	161/18569	4.03583e-45	2.05491e-42	1.71558e-42	mrm1/naf1/mrm3a/exosc6/znhit6/rrp36/zcchc4/bop1/tsr2/nsun5/dimt1l/tfb2m/imp4/gnl3l/nifk/rsl1d1/mrto4/bxdc2/pwp1/nol6/snu13b/utp6/fbl/dkc1/bysl/dcaf13/eif6/gnl3/wdr12/rrp7a/riok2/exosc2/gar1/utp15/ncl/rpusd2/wdr36/imp3/snu13a/eri1/mphosph10/ddx18/nop10/pdcd11/bud23/rpl7l1/exosc7/rcl1/rrp15/exosc8/pes/ddx49/rrs1/ppan/utp25/nop2/rpf2/abt1/rexo4/wdr75/utp3/nop56/utp4/rrp1/mak16/tsr3/riok1/gnl2/dhx37/…	112
GO:0006974	GO:0006974	DNA damage response	195/3491	438/18569	8.30689e-36	3.62536e-33	3.0267e-33	rad54b/mcm9/ube2t/mcm10/cdc45/samhd1/chek1/unga/tonsl/rad23ab/ddx11/blm/pole2/fanci/dtl/swi5/zswim7/hmces/pold1/pclaf/fen1/exo1/cdc7/tdp1/pcna/rbbp8/eme1/e2f7/rfc2/chaf1a/fancg/dclre1a/rmi1/rad51/recql/pms1/zgc:112496/rad52/apex2/msh2/mms22l/pold2/rfc1/hpf1/phlda3/nsmce4a/rnaseh2a/rad51c/rpa2/atrip/wdhd1/brip1/pole/rfc4/gins4/fancc/wdr76/zgc:110269/alkbh3/gins2/msh6/rfc3/ddb2/rpa3/tipin/xrcc1/rad…	195
GO:0006281	GO:0006281	DNA repair	159/3491	335/18569	2.38197e-33	9.09613e-31	7.59408e-31	rad54b/mcm9/ube2t/cdc45/samhd1/unga/tonsl/rad23ab/ddx11/blm/pole2/fanci/dtl/swi5/zswim7/pold1/pclaf/fen1/exo1/cdc7/tdp1/pcna/rbbp8/eme1/rfc2/chaf1a/fancg/dclre1a/rmi1/rad51/recql/pms1/zgc:112496/rad52/apex2/msh2/mms22l/pold2/rfc1/hpf1/nsmce4a/rnaseh2a/rad51c/rpa2/atrip/wdhd1/brip1/pole/rfc4/gins4/fancc/zgc:110269/alkbh3/gins2/msh6/rfc3/ddb2/rpa3/xrcc1/rad9a/neil3/wrnip1/pms2/rfwd3/mpg/rad51ap1/ra…	159
GO:0006399	GO:0006399	tRNA metabolic process	98/3491	164/18569	2.69403e-31	9.14474e-29	7.63466e-29	trmt61a/thg1l/zcchc7/rpp25l/lrrc47/trub1/thada/pus1/trmt13/rpp14/mocs3/pus3/iars1/tsen2/pus10/tp53rk/dus2/trnt1/wdr4/polr3d/mettl1/yars1/pus7/rars1/wars1/ssb/exosc2/si:ch211-225b11.4/alkbh8/rpp30/dus4l/polr3b/trmu/osgep/vars1/gatb/exosc7/qrsl1/nsun2/exosc8/elp2/ptcd1/gars1/dtwd1/trmt5/rtcb/rpp38/lars1b/ctu2/mars1/thumpd1/elp5/trmt61b/kars1/dus3l/tars1/mettl2a/hars/farsa/urm1/pop5/trmt112/elac2/po…	98
GO:0006260	GO:0006260	DNA replication	88/3491	141/18569	3.06034e-30	9.34934e-28	7.80548e-28	dscc1/mcm10/cdc45/esco2/samhd1/e2f8/tonsl/twnk/ddx11/blm/pole2/dtl/pola2/pold1/fen1/pcna/lrwd1/eme1/e2f7/orc2/rfc2/chaf1a/rrm1/rmi1/rad51/cdc6/recql/prim2/terf1/prim1/orc4/mms22l/pold2/rfc1/rnaseh2a/rpa2/orc5/wdhd1/pole/rfc4/gins4/gins3/zgc:110269/gins2/gins1/rfc3/rpa3/tipin/mcmbp/wrnip1/lig1/mcm7/rbbp4/orc3/rfc5/ssrp1a/mcm5/pold3/cenpx/pola1/rpa1/mcm6/parp1/mcm4/mcm2/mcm3/orc6/primpol/noc3l/cdt1…	88
GO:0016071	GO:0016071	mRNA metabolic process	192/3491	477/18569	2.60254e-28	7.22796e-26	6.03441e-26	hnrnpa3/tent5bb/pcbp4/zgc:103759/coil/slbp/tent5ba/rbm25a/zcchc7/tent5c/srpk1b/tut1/exosc6/trub1/pde12/mtpap/pus1/pus3/mrto4/tbrg4/exosc5/trnau1apa/snu13b/bud13/dkc1/scnm1/htatsf1/cnot6l/mettl14/exosc2/bcas2/snu13a/srek1ip1/pcf11/dcp2/cpsf4/rbm15/exosc7/magoh/fastkd1/exosc8/lsm1/prpf19/prmt7/srsf10b/hnrnpa1b/mettl3/tent2/syncrip/dcps/dhx37/gcfc2/nudt21/u2af1/snrpd1/lsm7/ptbp2b/srrt/tent5ab/prkrip…	192
GO:0006397	GO:0006397	mRNA processing	146/3491	342/18569	8.64051e-25	2.19973e-22	1.83649e-22	hnrnpa3/pcbp4/coil/slbp/rbm25a/srpk1b/tut1/mtpap/trnau1apa/snu13b/bud13/scnm1/htatsf1/cnot6l/mettl14/bcas2/snu13a/srek1ip1/pcf11/cpsf4/rbm15/magoh/lsm1/prpf19/prmt7/srsf10b/hnrnpa1b/tent2/dcps/dhx37/gcfc2/nudt21/u2af1/snrpd1/lsm7/ptbp2b/srrt/prkrip1/snrpd2/lsm8/lsm3/crnkl1/snrpd3l/ddx39ab/snrpa/cirbpa/srsf2a/cstf1/snrpb/smu1a/snrpa1/sde2/zmat5/srsf7a/rbm7/ddx39aa/plrg1/eif4a3/snrpg/hnrnpua/ythdc1…	146
GO:0043043	GO:0043043	peptide biosynthetic process	177/3491	460/18569	1.53628e-23	3.61027e-21	3.0141e-21	pkz/eif4ebp3/mrrf/impact/trim2a/lrrc47/gtpbp2b/mrpl24/nanos1/chchd1/mrpl43/iars1/fibina/eef2l2/eif3hb/mrps16/trnau1apa/tsfm/msi2b/mtg1/eif4ebp3l/mrps14/yars1/mrpl18/mtrf1/eif6/mrpl58/rars1/mrpl22/mrpl11/wars1/cnot6l/ssb/mrpl41/mrps23/rpp30/mrps5/stk35/mrpl14/mrps11/mrpl16/vars1/gatb/cnbpa/qrsl1/magoh/mrps24/gars1/rnf25/secisbp2/mrpl12/mrpl4/cnbpb/mrpl15/drg1/mrps18a/eif1axa/tufm/eif2d/mrps2/mrps1…	177
GO:0006261	GO:0006261	DNA-templated DNA replication	59/3491	87/18569	1.78629e-23	3.89794e-21	3.25427e-21	mcm10/cdc45/e2f8/tonsl/twnk/blm/pole2/pola2/pold1/pcna/eme1/e2f7/rfc2/rad51/cdc6/recql/prim2/prim1/orc4/mms22l/pold2/orc5/wdhd1/pole/rfc4/gins4/gins3/gins2/gins1/rfc3/tipin/mcmbp/wrnip1/lig1/mcm7/orc3/rfc5/mcm5/pold3/cenpx/pola1/mcm6/parp1/mcm4/mcm2/mcm3/orc6/primpol/noc3l/cdt1/pole4/timeless/orc1/ssbp1/dbf4/pole3/chrac1/wdr18/atrxl	59
GO:0006412	GO:0006412	translation	175/3491	454/18569	2.1924e-23	4.46518e-21	3.72785e-21	pkz/eif4ebp3/mrrf/impact/trim2a/lrrc47/gtpbp2b/mrpl24/nanos1/chchd1/mrpl43/iars1/fibina/eef2l2/eif3hb/mrps16/trnau1apa/tsfm/msi2b/mtg1/eif4ebp3l/mrps14/yars1/mrpl18/mtrf1/eif6/mrpl58/rars1/mrpl22/mrpl11/wars1/cnot6l/ssb/mrpl41/mrps23/rpp30/mrps5/stk35/mrpl14/mrps11/mrpl16/vars1/gatb/cnbpa/qrsl1/magoh/mrps24/gars1/rnf25/secisbp2/mrpl12/mrpl4/cnbpb/mrpl15/drg1/mrps18a/eif1axa/tufm/eif2d/mrps2/mrps1…	175
GO:0008380	GO:0008380	RNA splicing	133/3491	311/18569	8.93578e-23	1.70618e-20	1.42443e-20	hnrnpa3/pcbp4/coil/rbm25a/srpk1b/rbm38/aff2/tsen2/trnau1apa/snu13b/bud13/scnm1/htatsf1/mettl14/bcas2/snu13a/srek1ip1/rbm15/magoh/prpf19/prmt7/srsf10b/hnrnpa1b/rtcb/dhx37/gcfc2/u2af1/snrpd1/lsm7/usb1/ptbp2b/prkrip1/snrpd2/lsm8/lsm3/crnkl1/snrpd3l/hnrnph1/ddx39ab/snrpa/cirbpa/srsf2a/snrpb/smu1a/snrpa1/sde2/zmat5/srsf7a/rbm7/ddx39aa/plrg1/eif4a3/snrpg/hnrnpua/ythdc1/sf3b4/srsf1a/rbm8a/isy1/snrnp27/s…	133
GO:0051276	GO:0051276	chromosome organization	112/3491	243/18569	1.54645e-22	2.77905e-20	2.32015e-20	mei4/mcm9/dscc1/esco2/ddx11/blm/zwilch/psmc3ip/mis12/cenpo/ncaph2/cenph/chtf8/rad51/nasp/ncapg2/recql/hat1/terf1/msh2/msh6/fbxo5/cenpn/tert/cenpt/si:dkey-108k21.10/mcmbp/zgc:153405/cenpp/si:ch211-113a14.24/cdca5/si:dkey-261m9.12/mcm7/dclre1b/si:ch211-113a14.18/mcm5/cenpx/kntc1/nbn/si:dkey-108k21.21/rpa1/mcm6/trip13/mcm4/smc2/ndc80/anapc15/mcm2/zw10/si:ch211-161h7.4/anapc2/nup155/mcm3/nup133/ska1/…	112
[truncated: 614 more rows]

## Sheet: tab.go_DEG_Multi48_cluster1
48 hpf cl 1	ID	Description	GeneRatio	BgRatio	pvalue	p.adjust	qvalue	geneID	Count
GO:0048514	GO:0048514	blood vessel morphogenesis	13/44	439/18569	1.61132e-11	5.61242e-09	3.54231e-09	apln/cxcr4a/dll4/dlc/igfbp7/hlx1/nrp1b/sox18/plk2b/mcamb/robo4/cdh5/aplnrb	13
[truncated: 412 more rows]

## Sheet: tab.go_DEG_Multi48_cluster2
48 hpf cl 2	ID	Description	GeneRatio	BgRatio	pvalue	p.adjust	qvalue	geneID	Count
[truncated: 249 more rows]

## Sheet: tab.go_DEG_Multi48_cluster3
48 hpf cl 3	ID	Description	GeneRatio	BgRatio	pvalue	p.adjust	qvalue	geneID	Count
[truncated: 456 more rows]

[truncated: 16 more sheets: tab.go_DEG_Multi48_cluster4, tab.go_DEG_Multi5_cluster0, tab.go_DEG_Multi5_cluster1, tab.go_DEG_Multi5_cluster2, tab.go_DEG_Multi5_cluster3, tab.go_DEG_Multi5_cluster4, tab.go_DEG_Multi5_cluster5, tab.go_DEG_Multi5_cluster6, tab.go_DEG_Multi5_cluster7, tab.go_DEG_Multi7_cluster0, tab.go_DEG_Multi7_cluster1, tab.go_DEG_Multi7_cluster2, tab.go_DEG_Multi7_cluster3, tab.go_DEG_Multi7_cluster4, tab.go_DEG_Multi7_cluster5, tab.go_DEG_Multi7_cluster6]
